# Supplementary material
Source: PubMed Central journal article supplement (PMC3734578)

## **The main pathways involved in salt tolerance of Thellungiella leaves**

The main pathways involved in salt tolerance of Thellungiella leaves correspond to the proteins that listed in Table 1 and their GO information including the enzyme code (EC) numbers were provided in Suppl Data 5.

# Sequence distribution: biological\_process

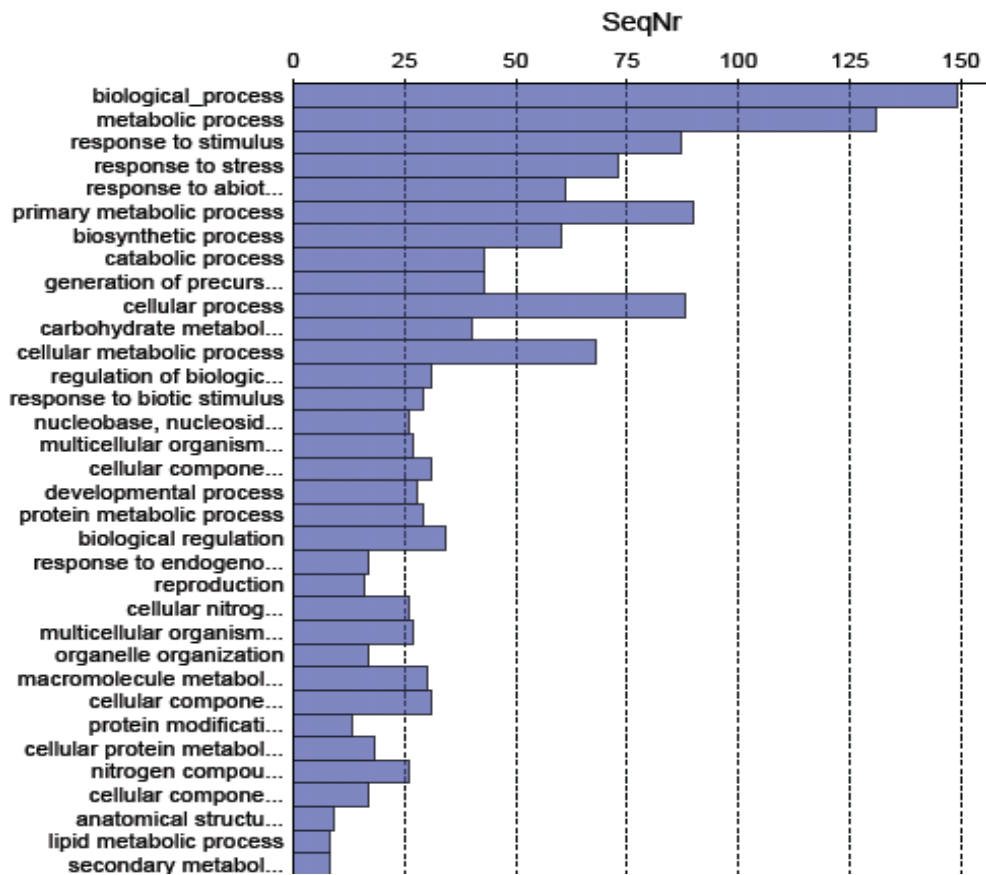

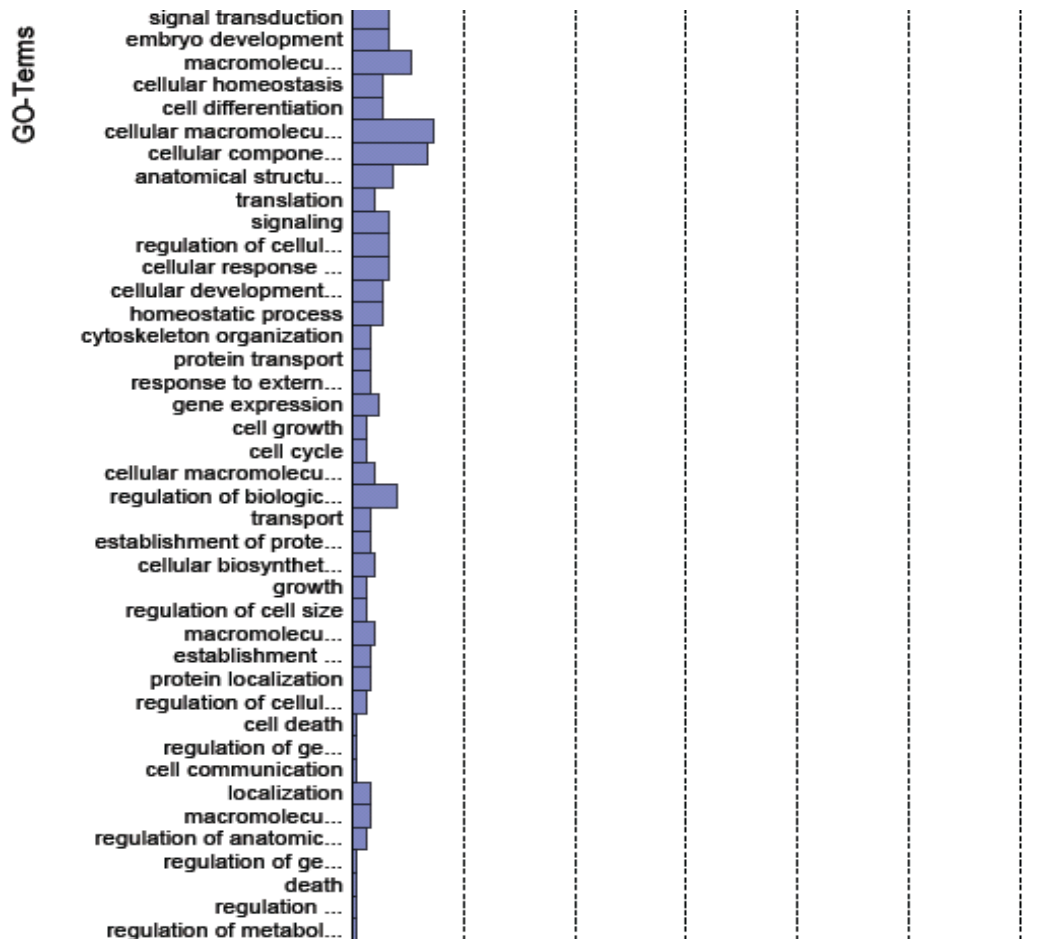

## GO-level distribution

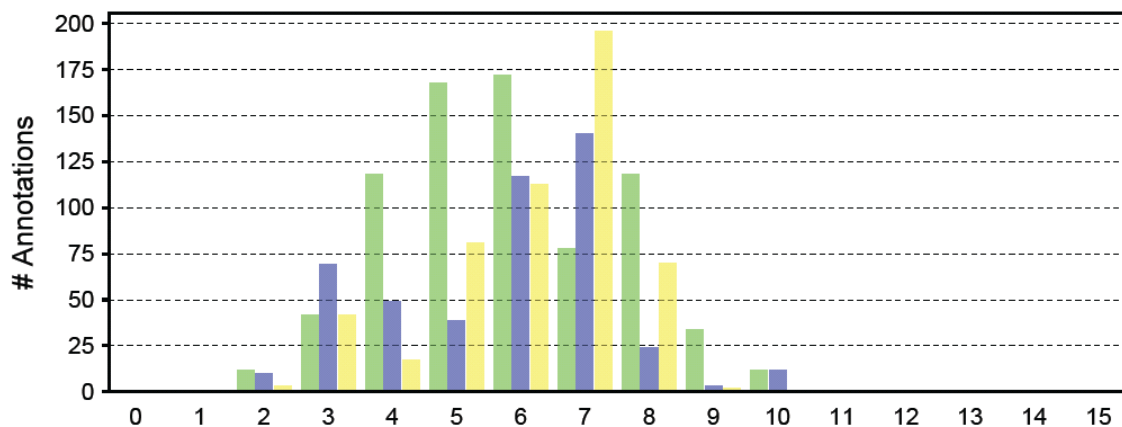

GO Level (Total Annotations = 1767, Mean Level = 5.825, Std. Deviation = 1.652)

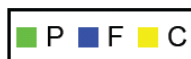

# Number of GO-terms for sequences with length(x)

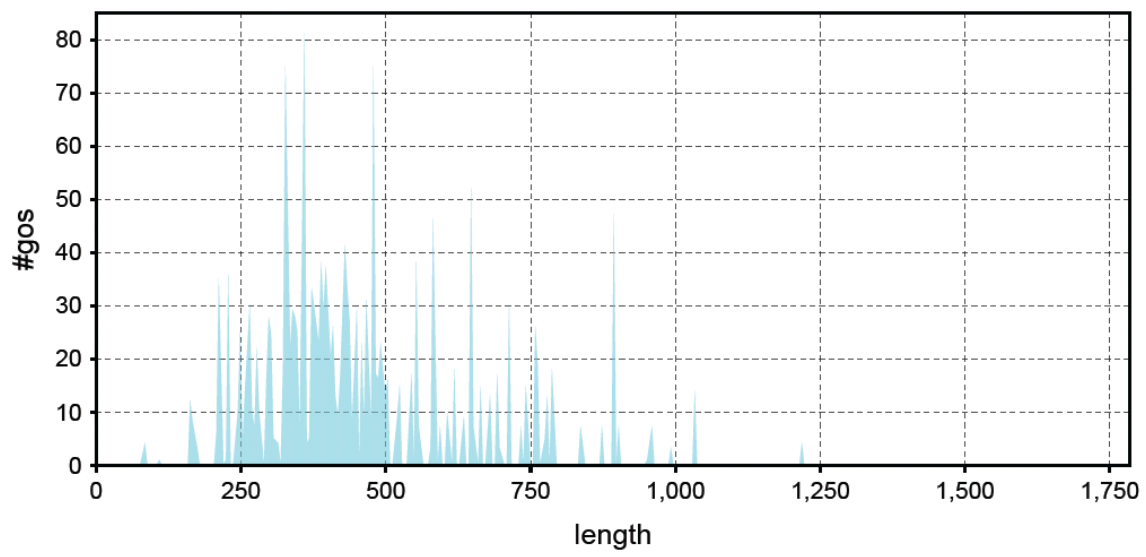

# Annotation-Score distribution

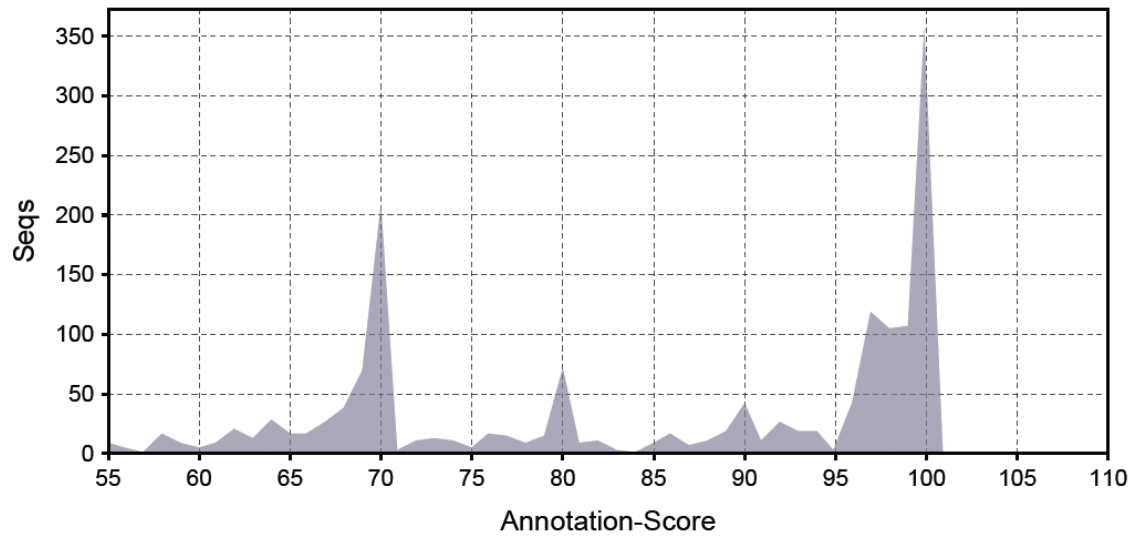

# The main pathways involved in salt tolerance of *Thellungiella*

Glycolysis/gluconeogenesis: 9 proteins

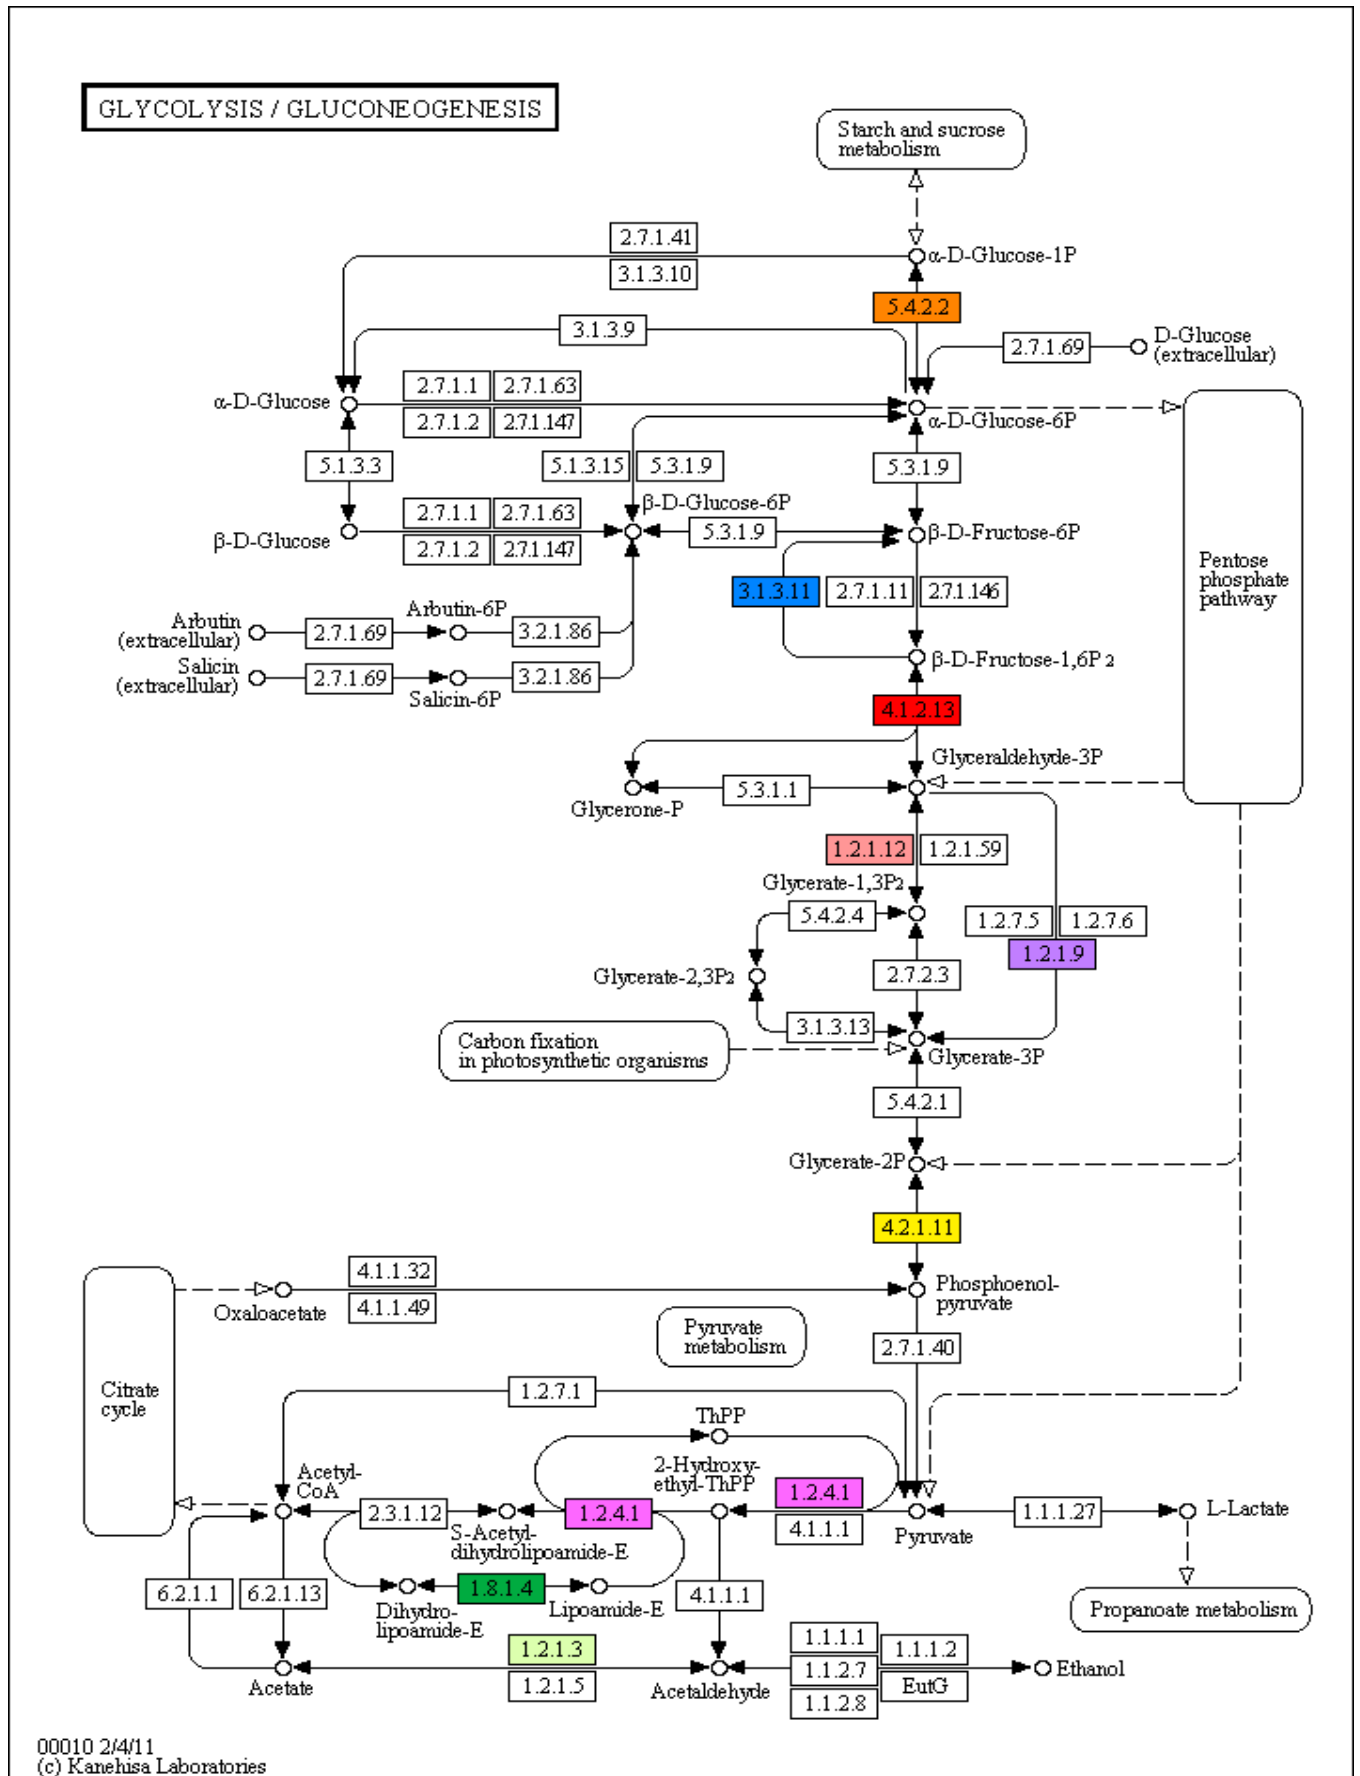

# Citrate cycle (TCA cycle): 6 proteins

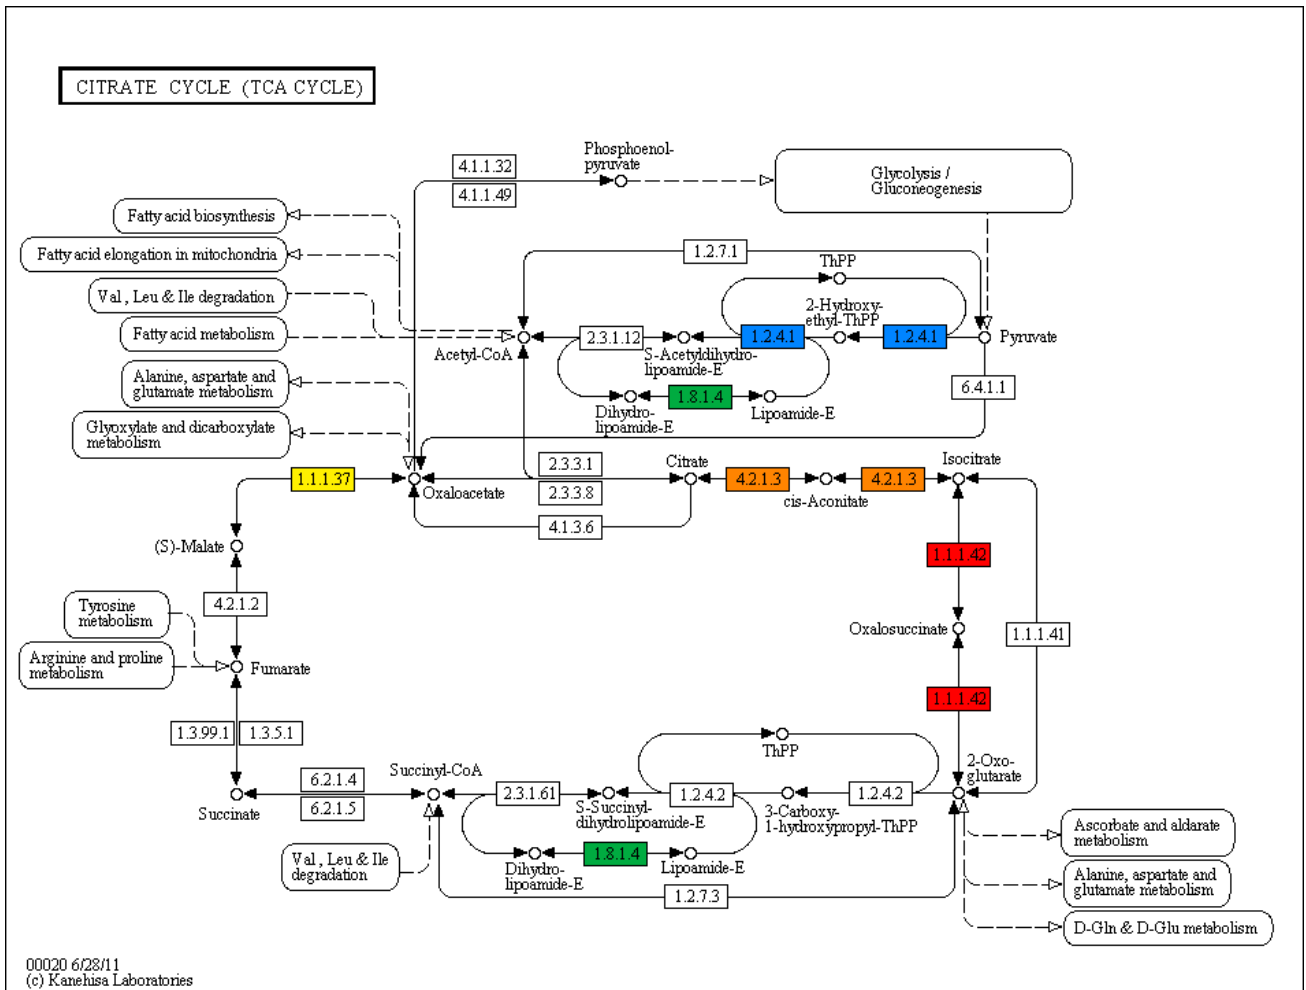











# Porphyrin and chlorophyll metabolism: 9 proteins

## PORPHYRIN AND CHLOROPHYLL METABOLISM

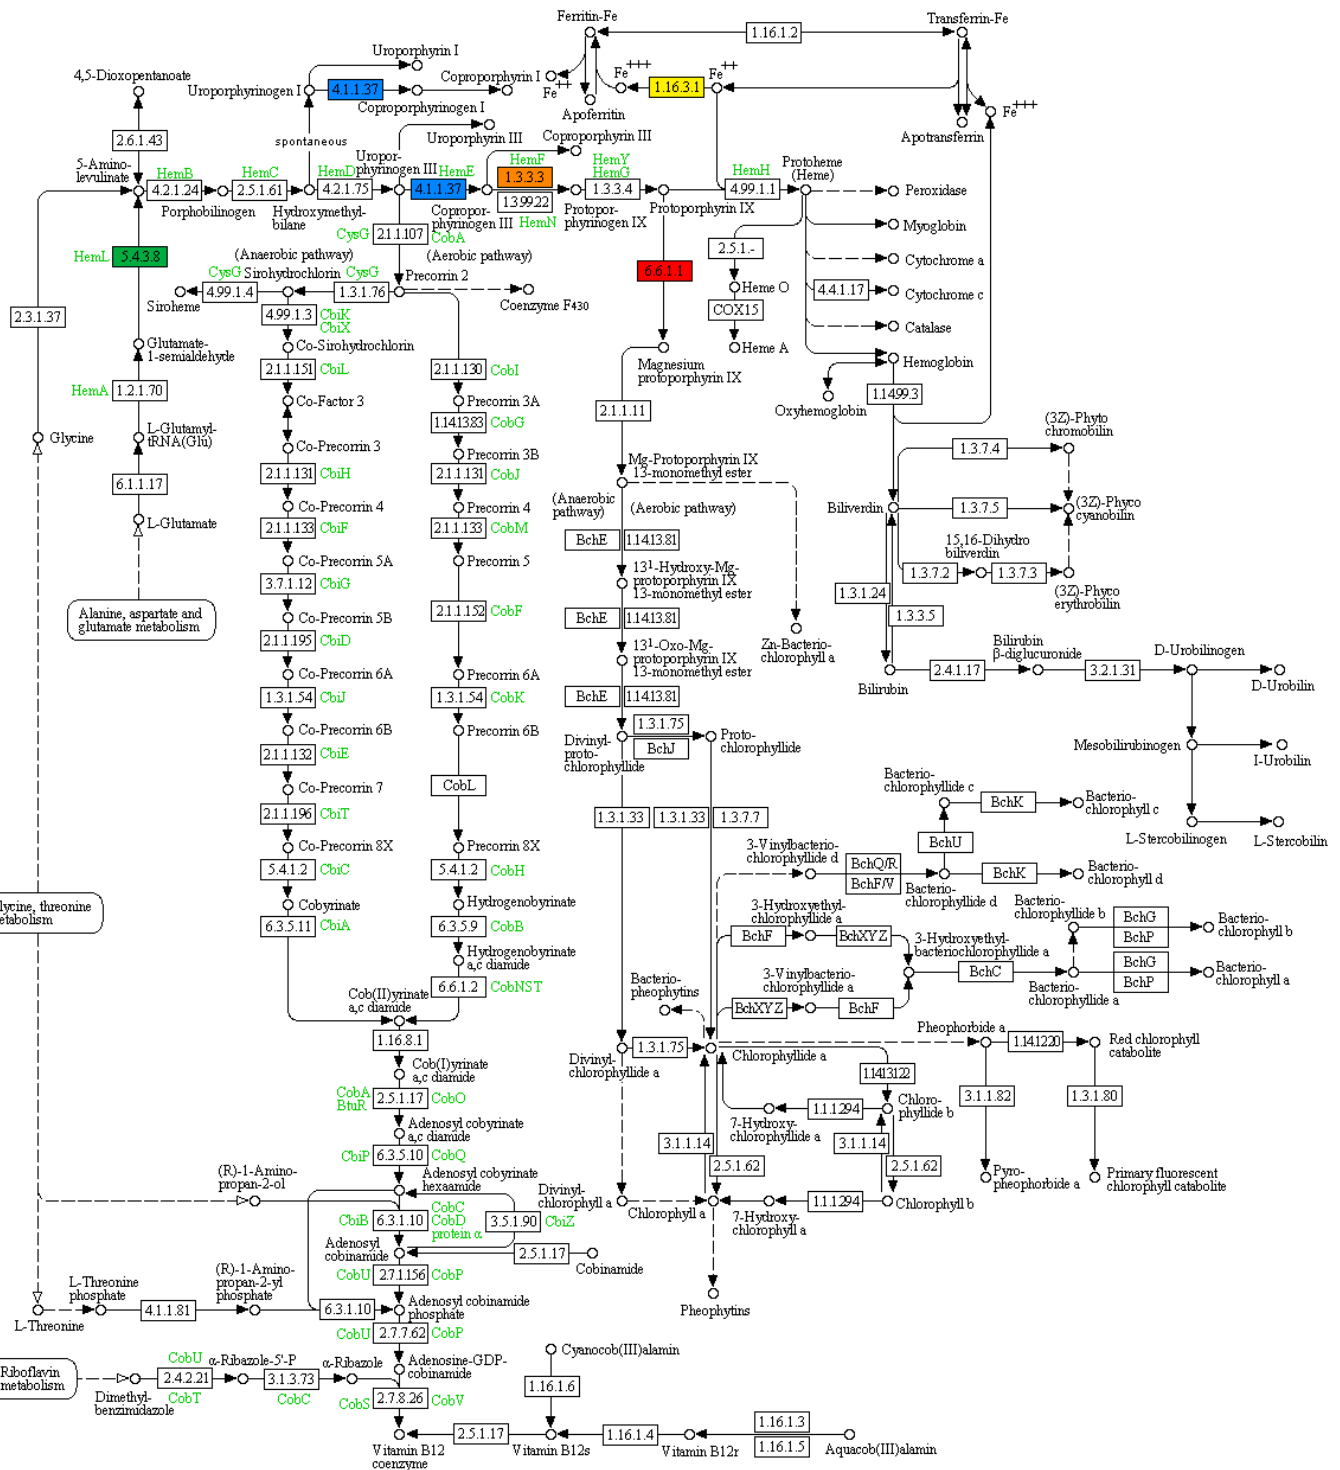

PENTOSE PHOSPHATE PATHWAY

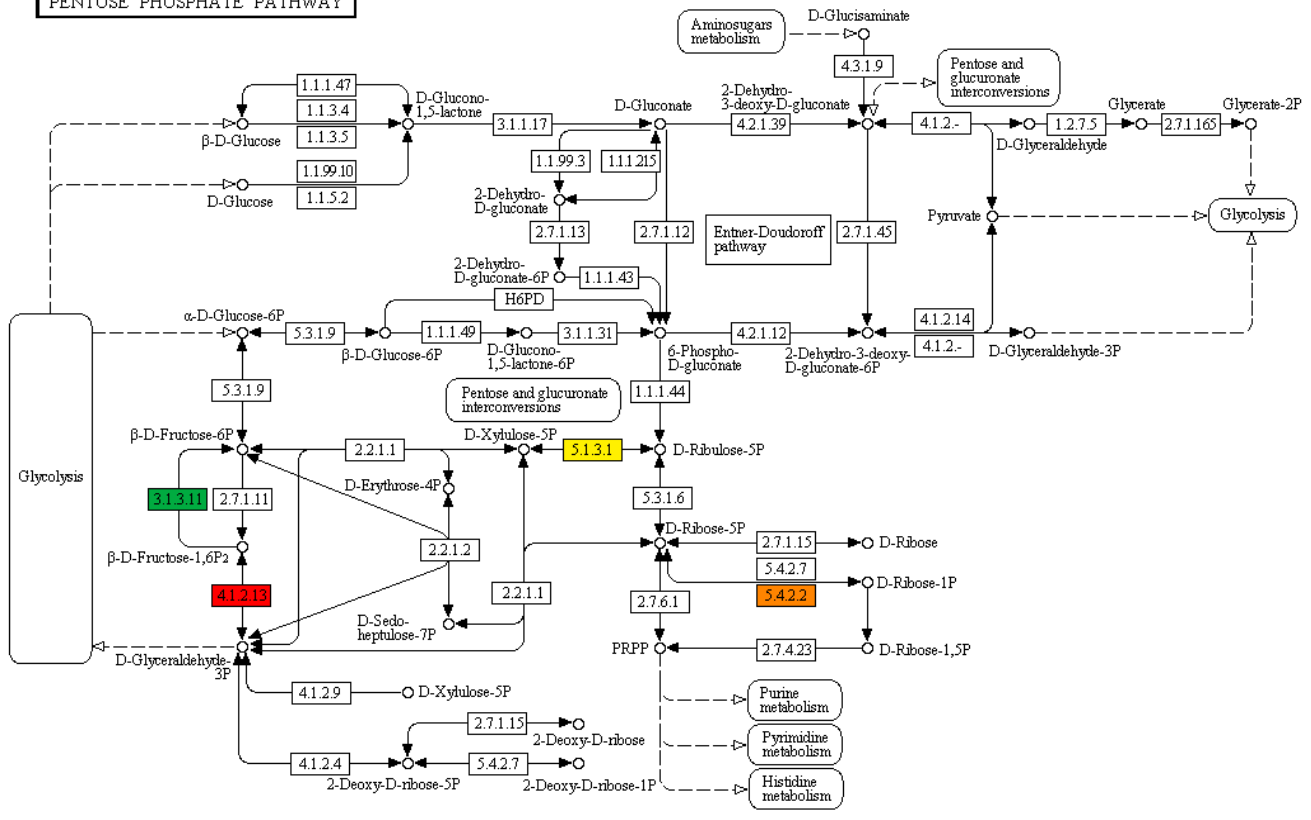

PENTOSE AND GLUCURONATE INTERCONVERSIONS

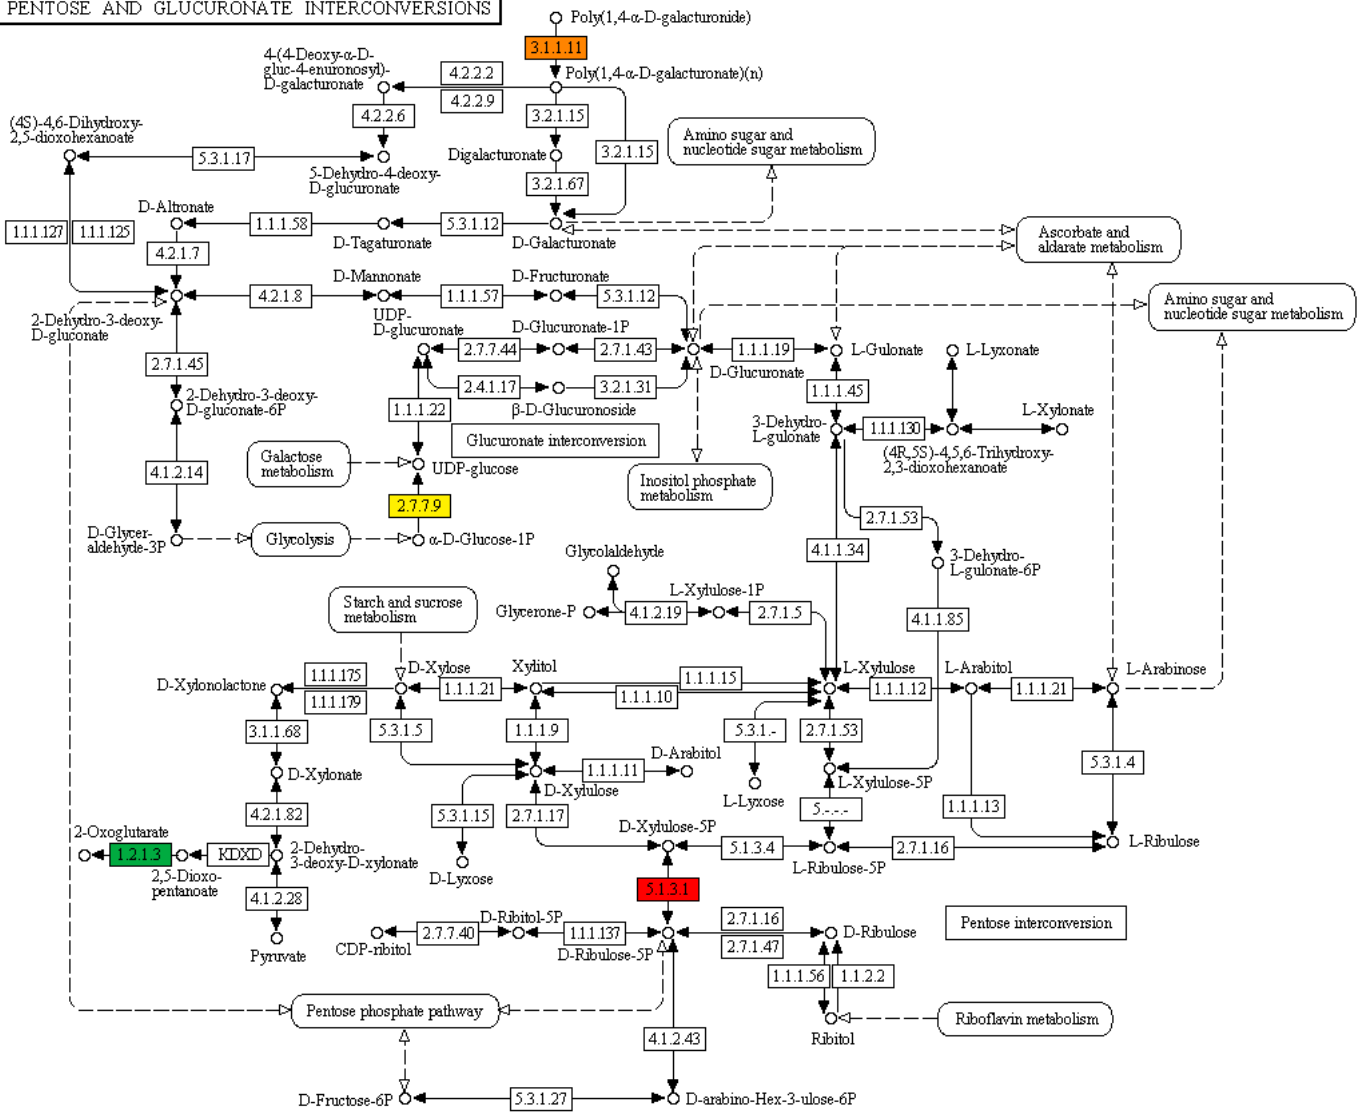









# FATTY ACID BIOSYNTHESIS

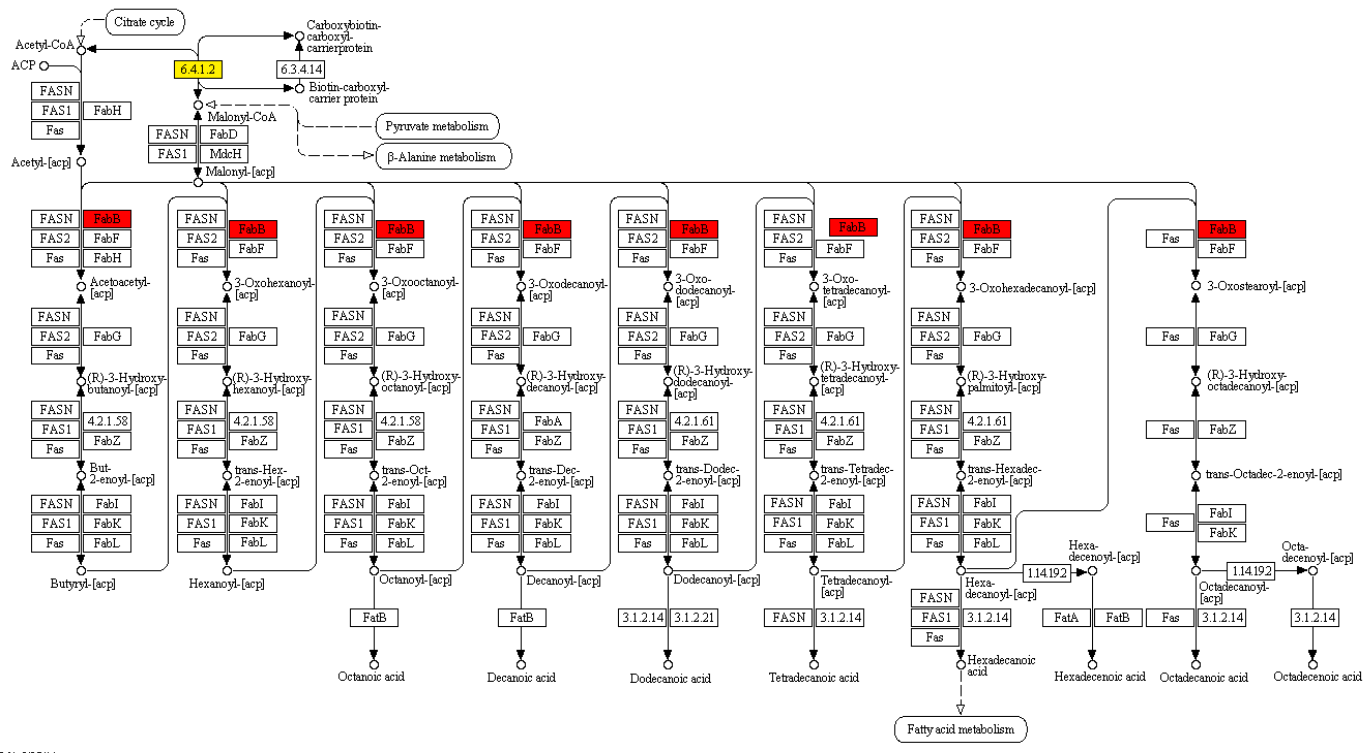

**FATTY ACID METABOLISM**

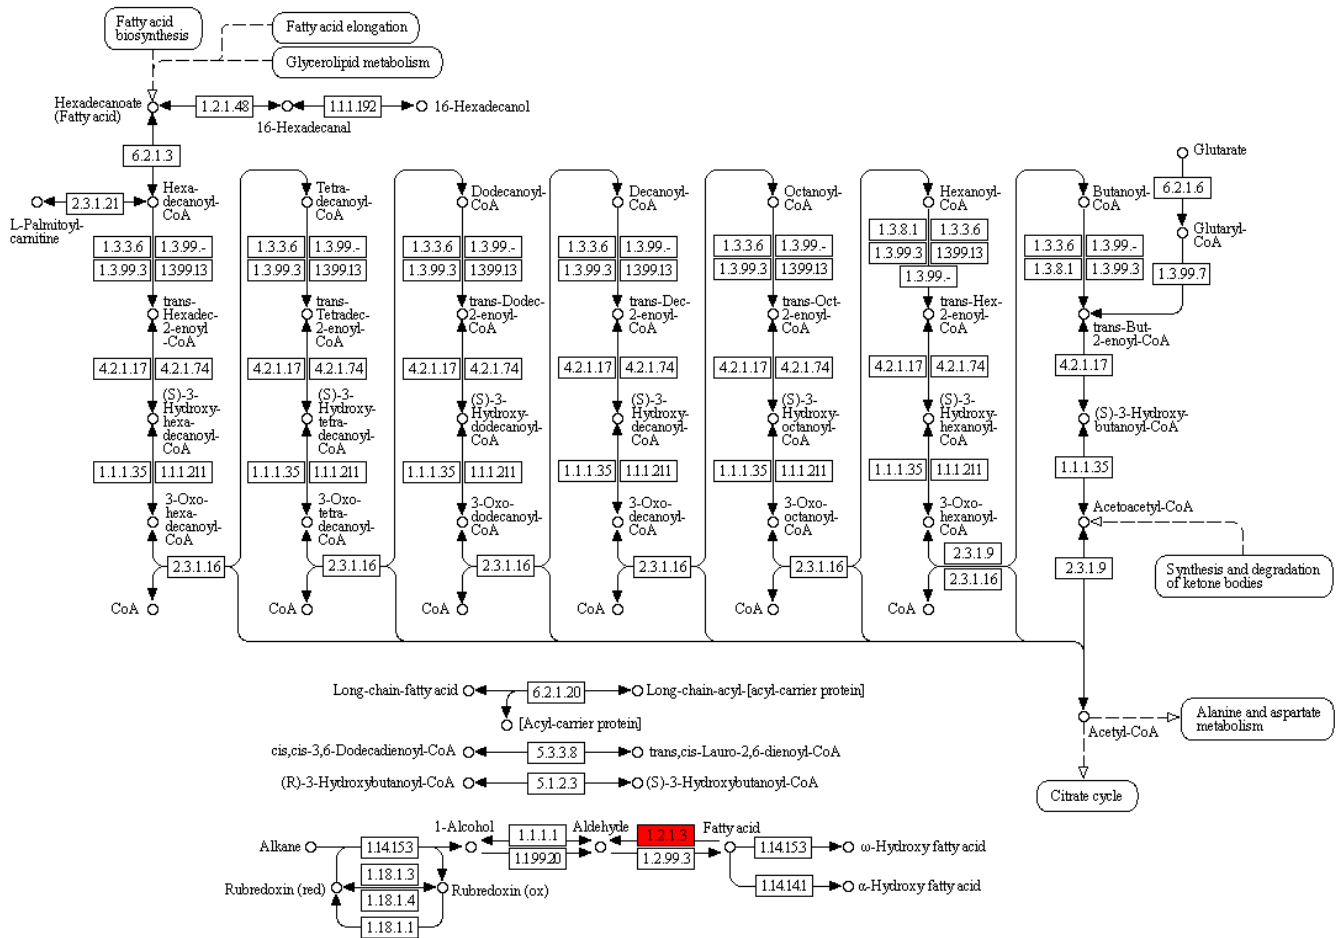



**PURINE METABOLISM**

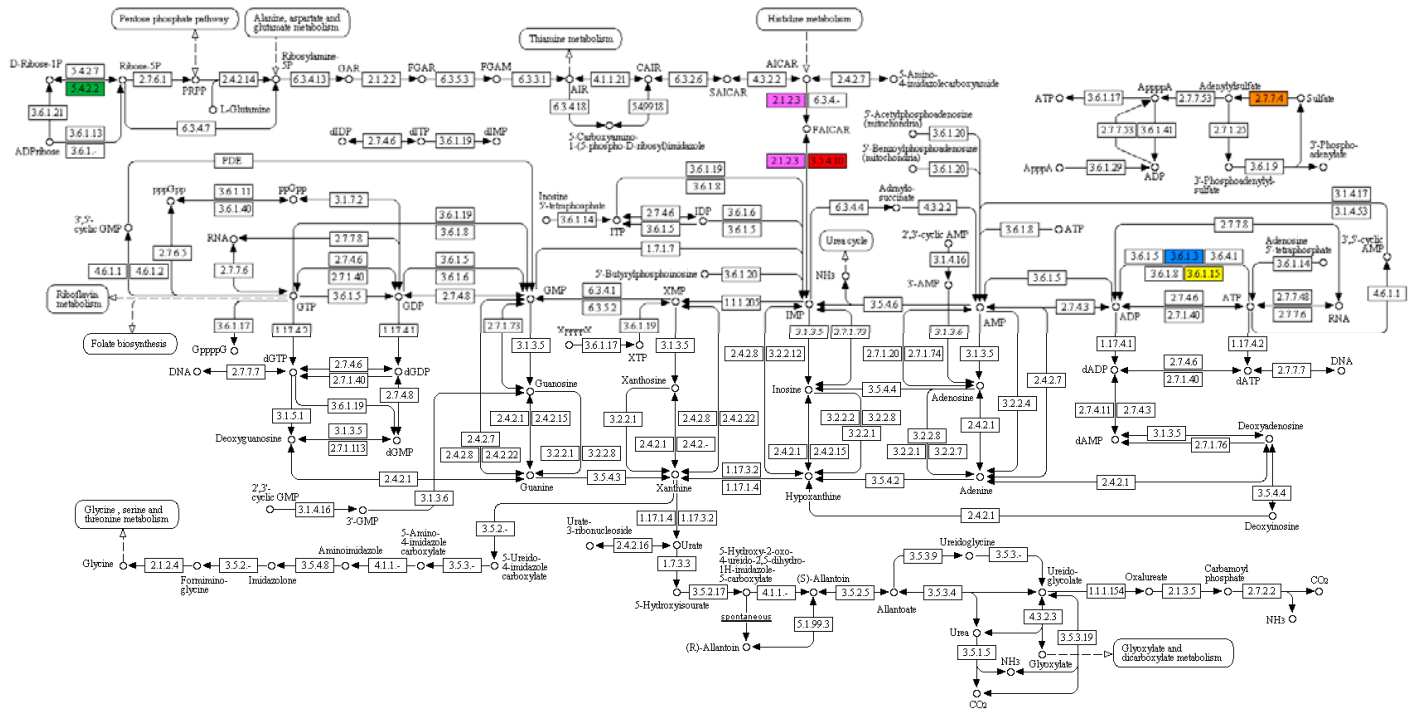

ALANINE, ASPARTATE AND GLUTAMATE METABOLISM

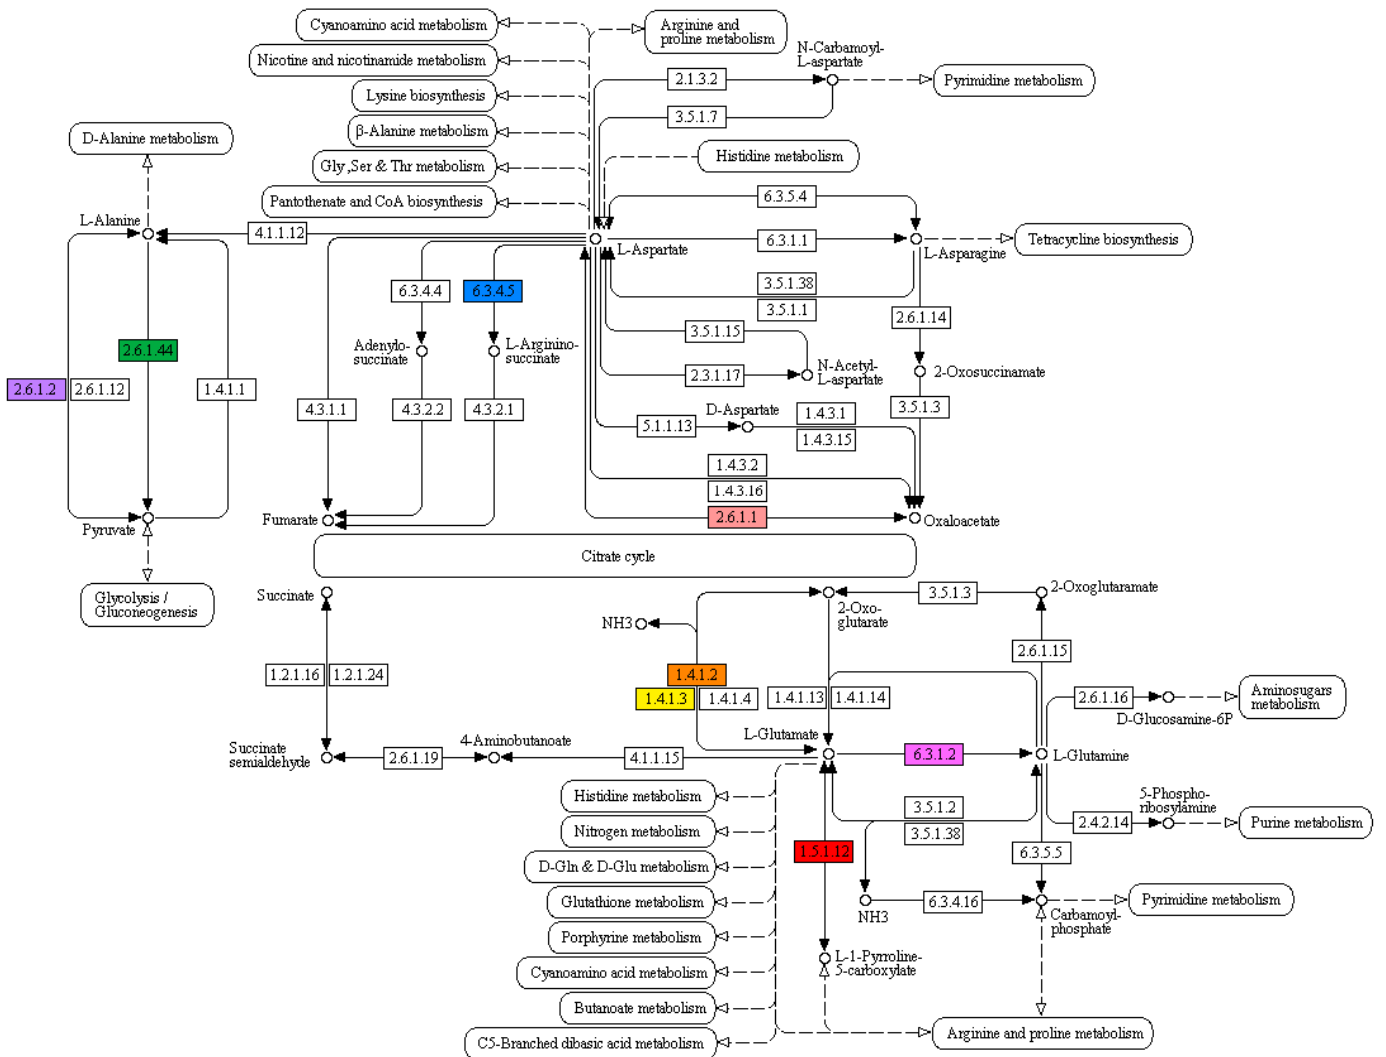

# TETRACYCLINE BIOSYNTHESIS

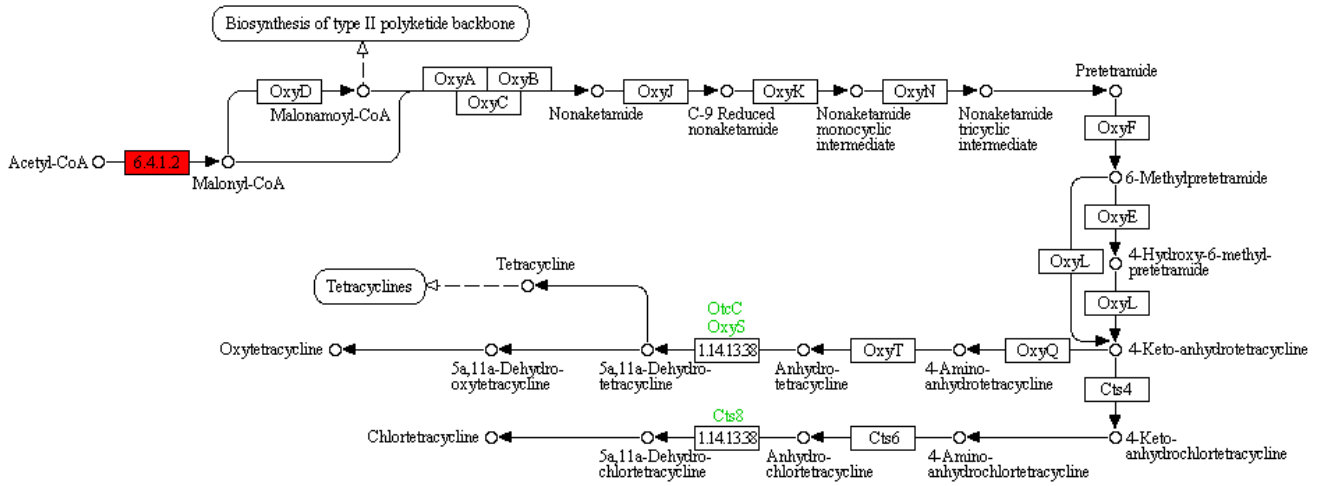

GLYCINE, SERINE AND THREONINE METABOLISM

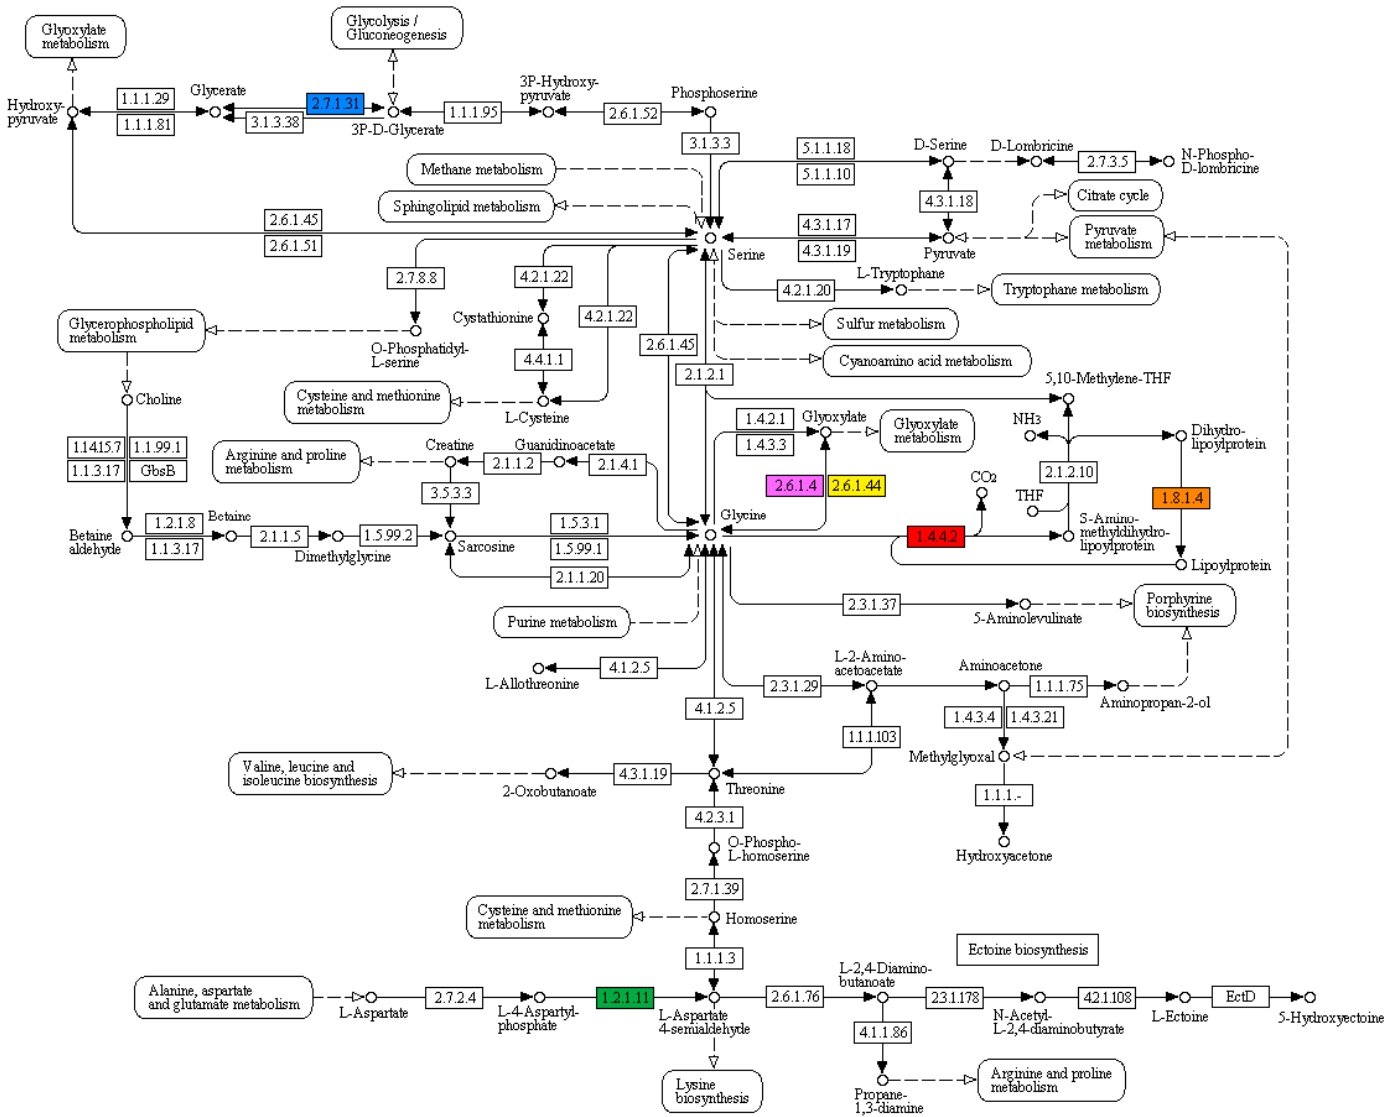



CYSTEINE AND METHIONINE METABOLISM

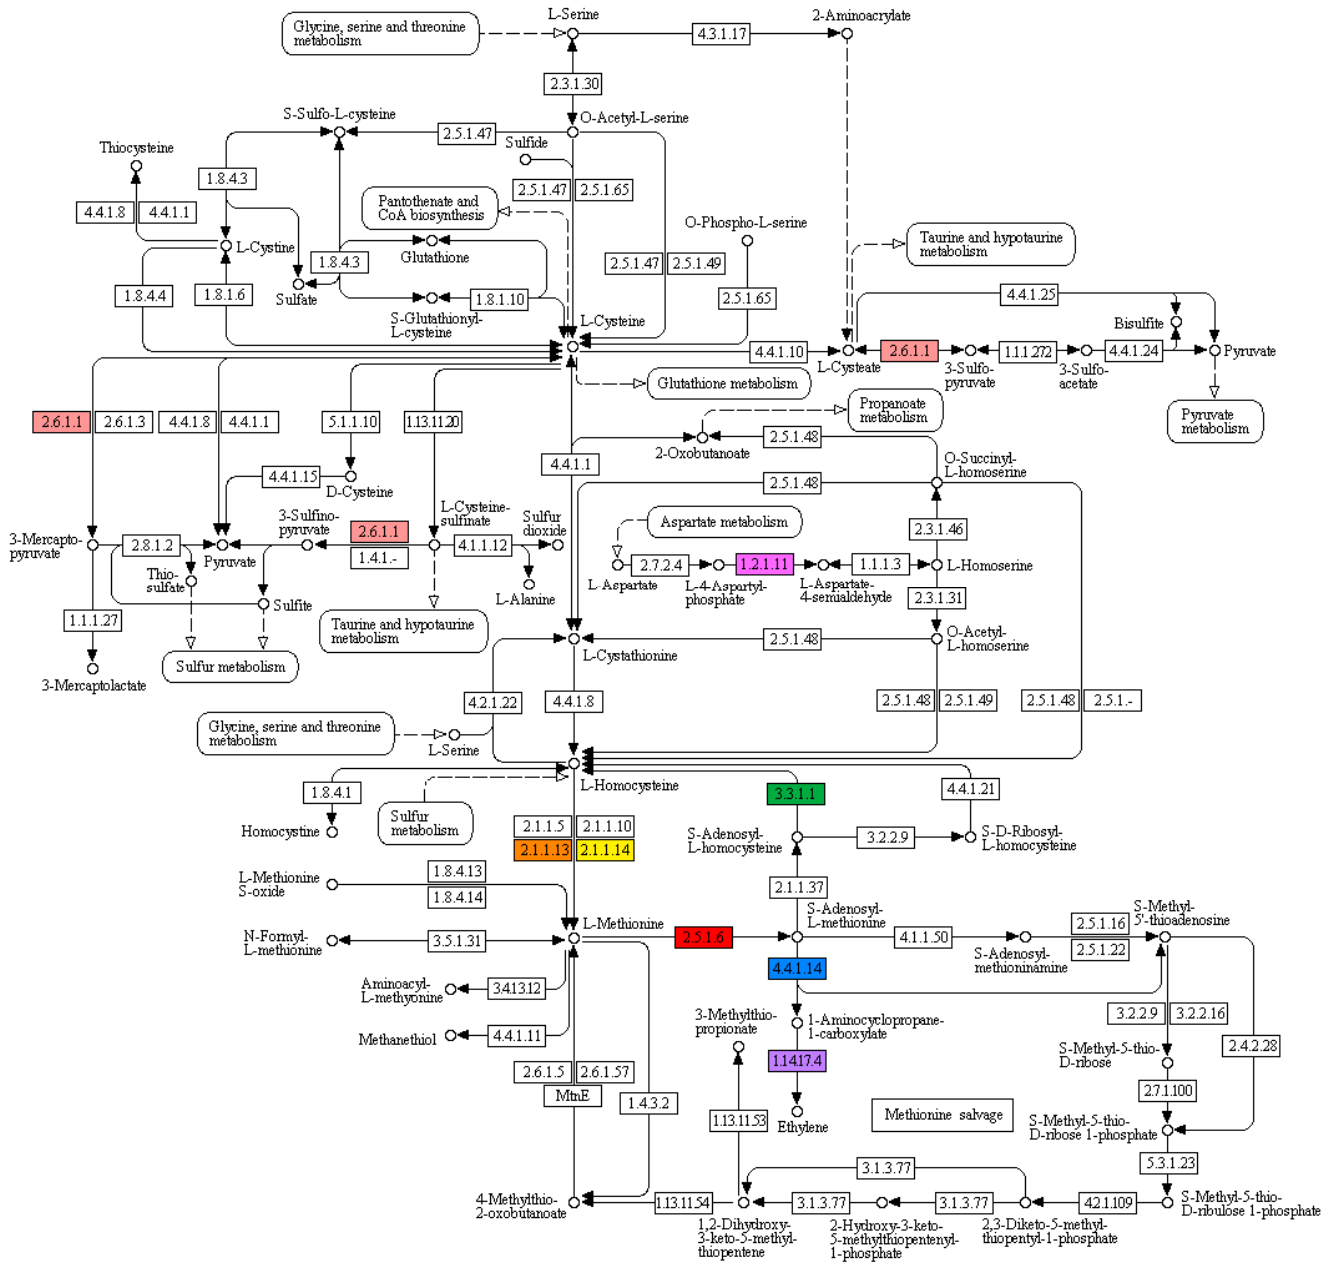

# VALINE, LEUCINE AND ISOLEUCINE DEGRADATION

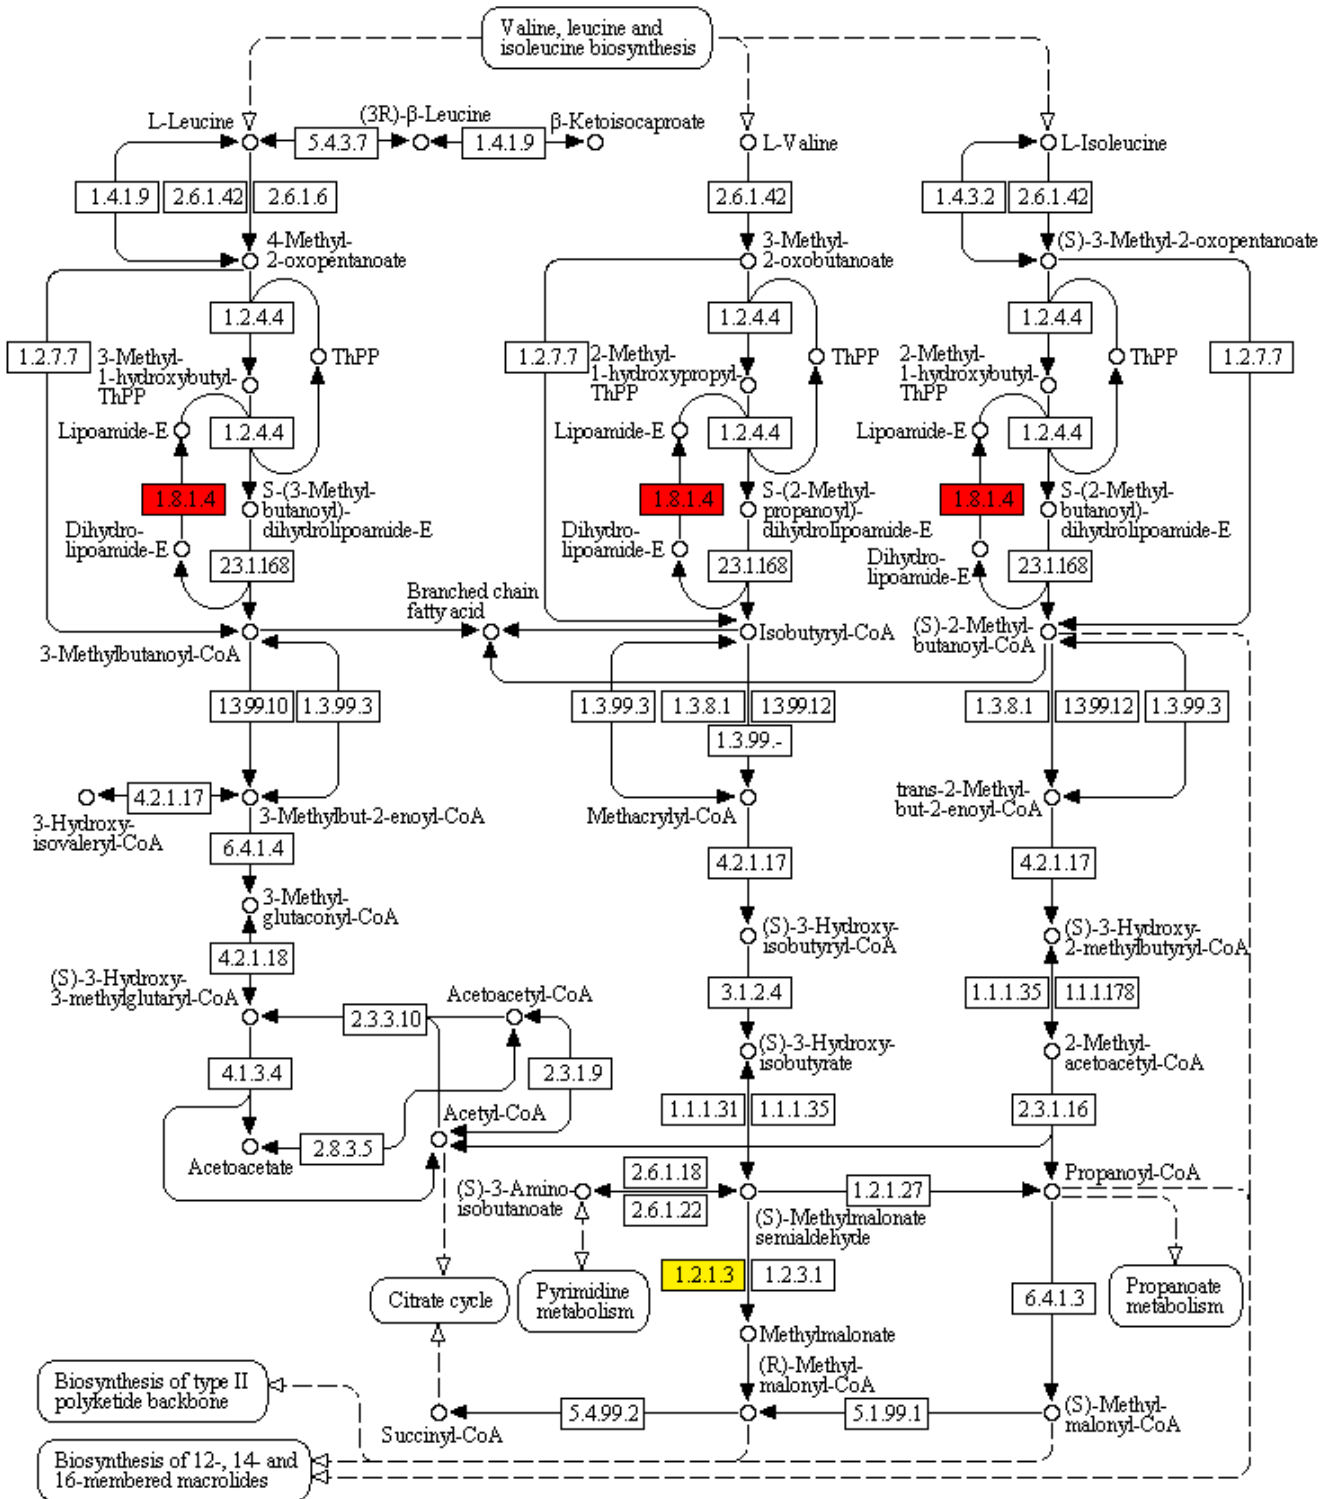



**LYSINE BIOSYNTHESIS**

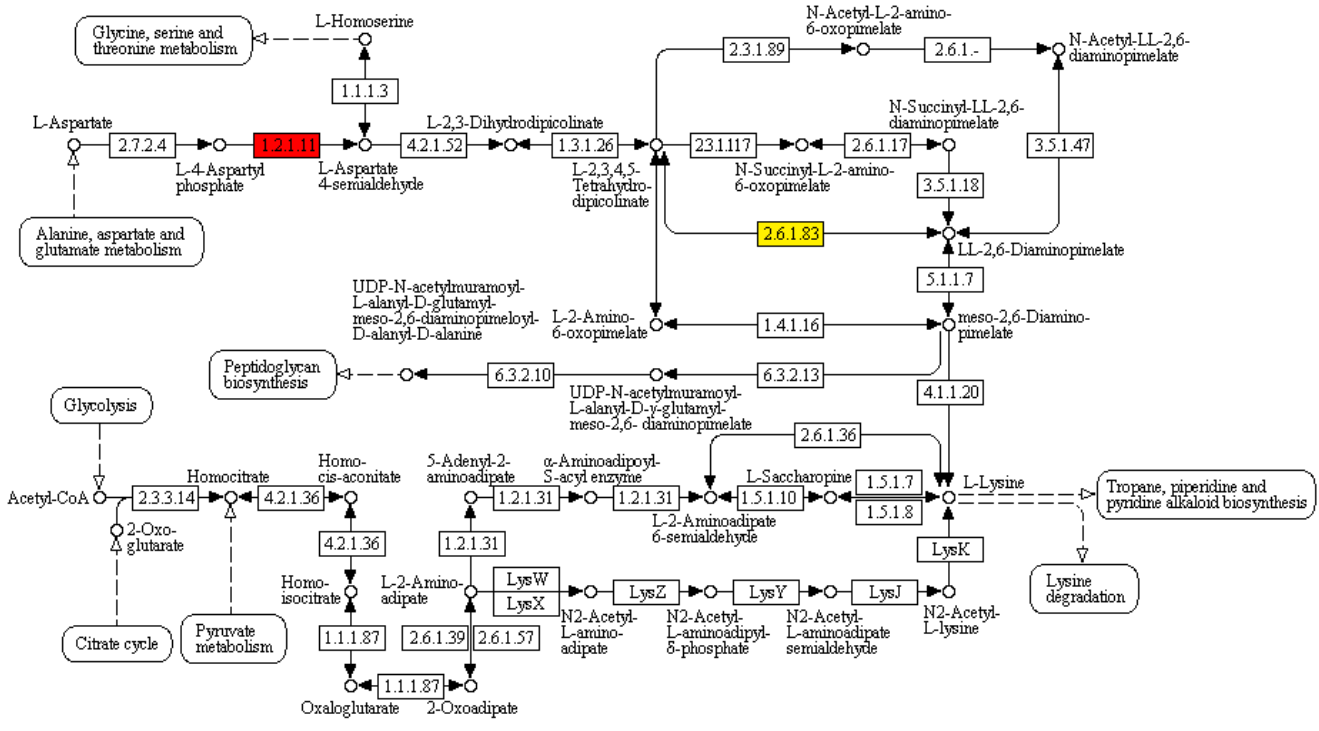



**ARGININE AND PROLINE METABOLISM**

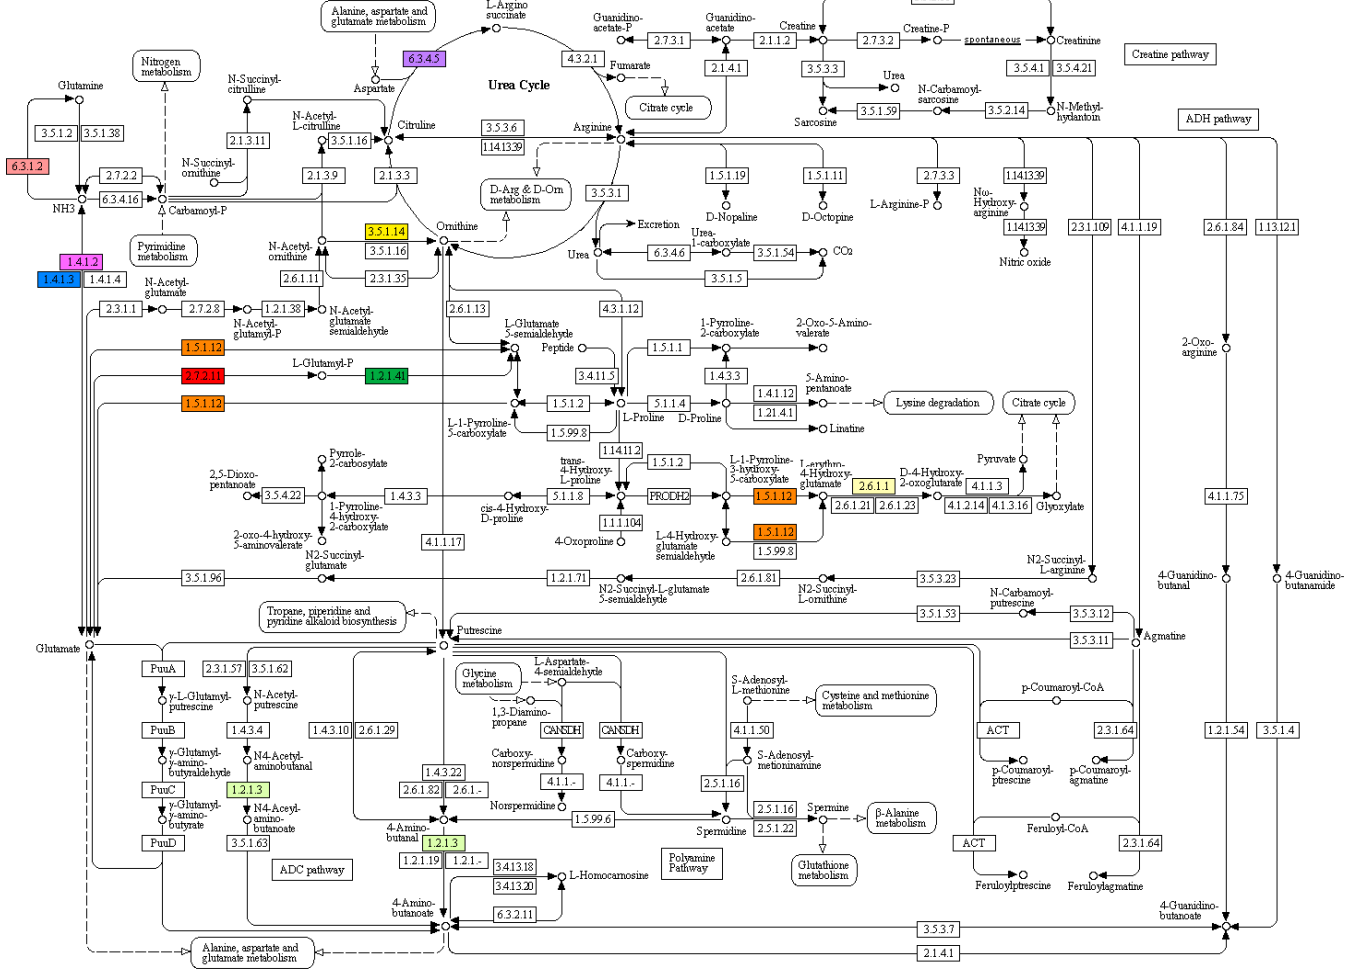









CHLOROCYCLOHEXANE AND CHLOROBENZENE DEGRADATION

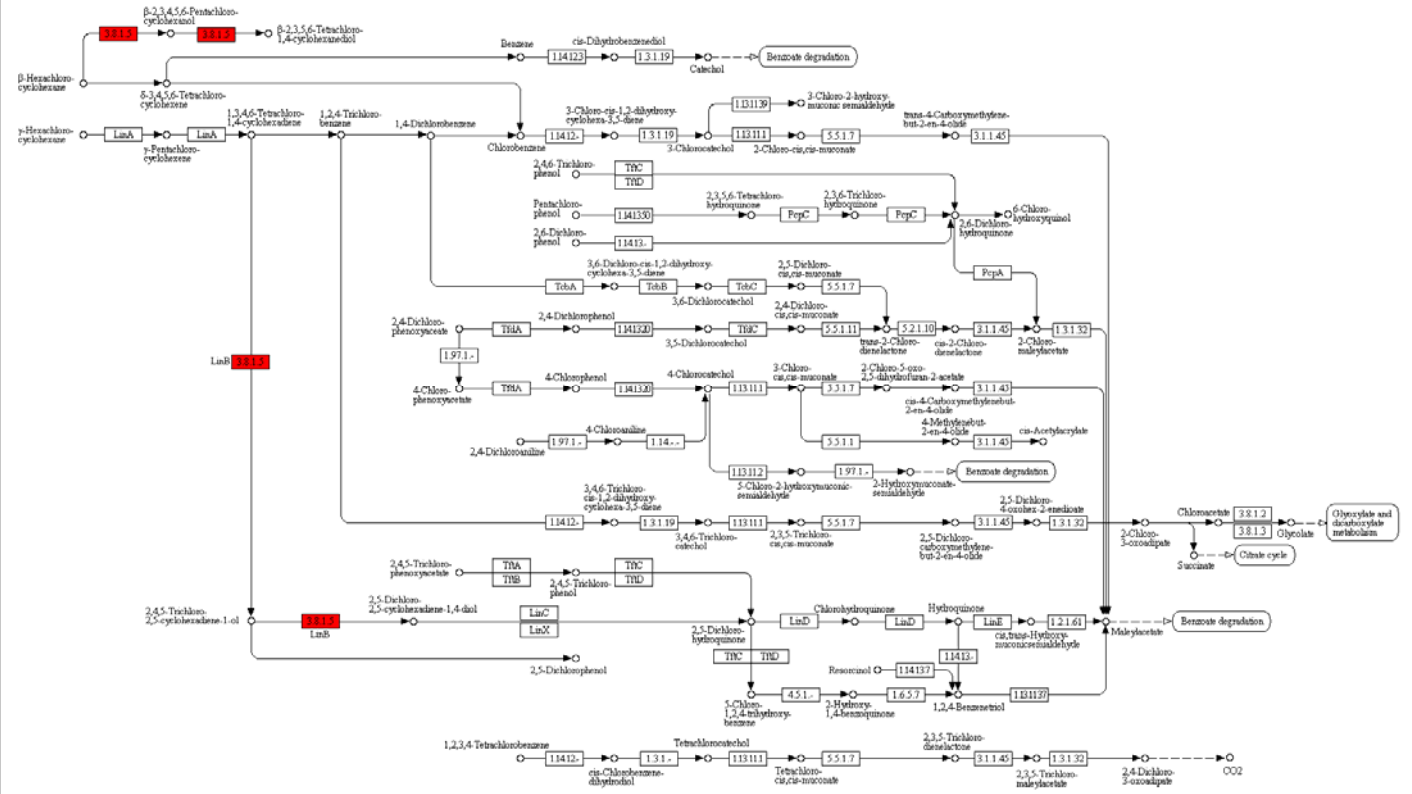



PHENYLALANINE, TYROSINE AND TRYPTOPHAN BIOSYNTHESIS

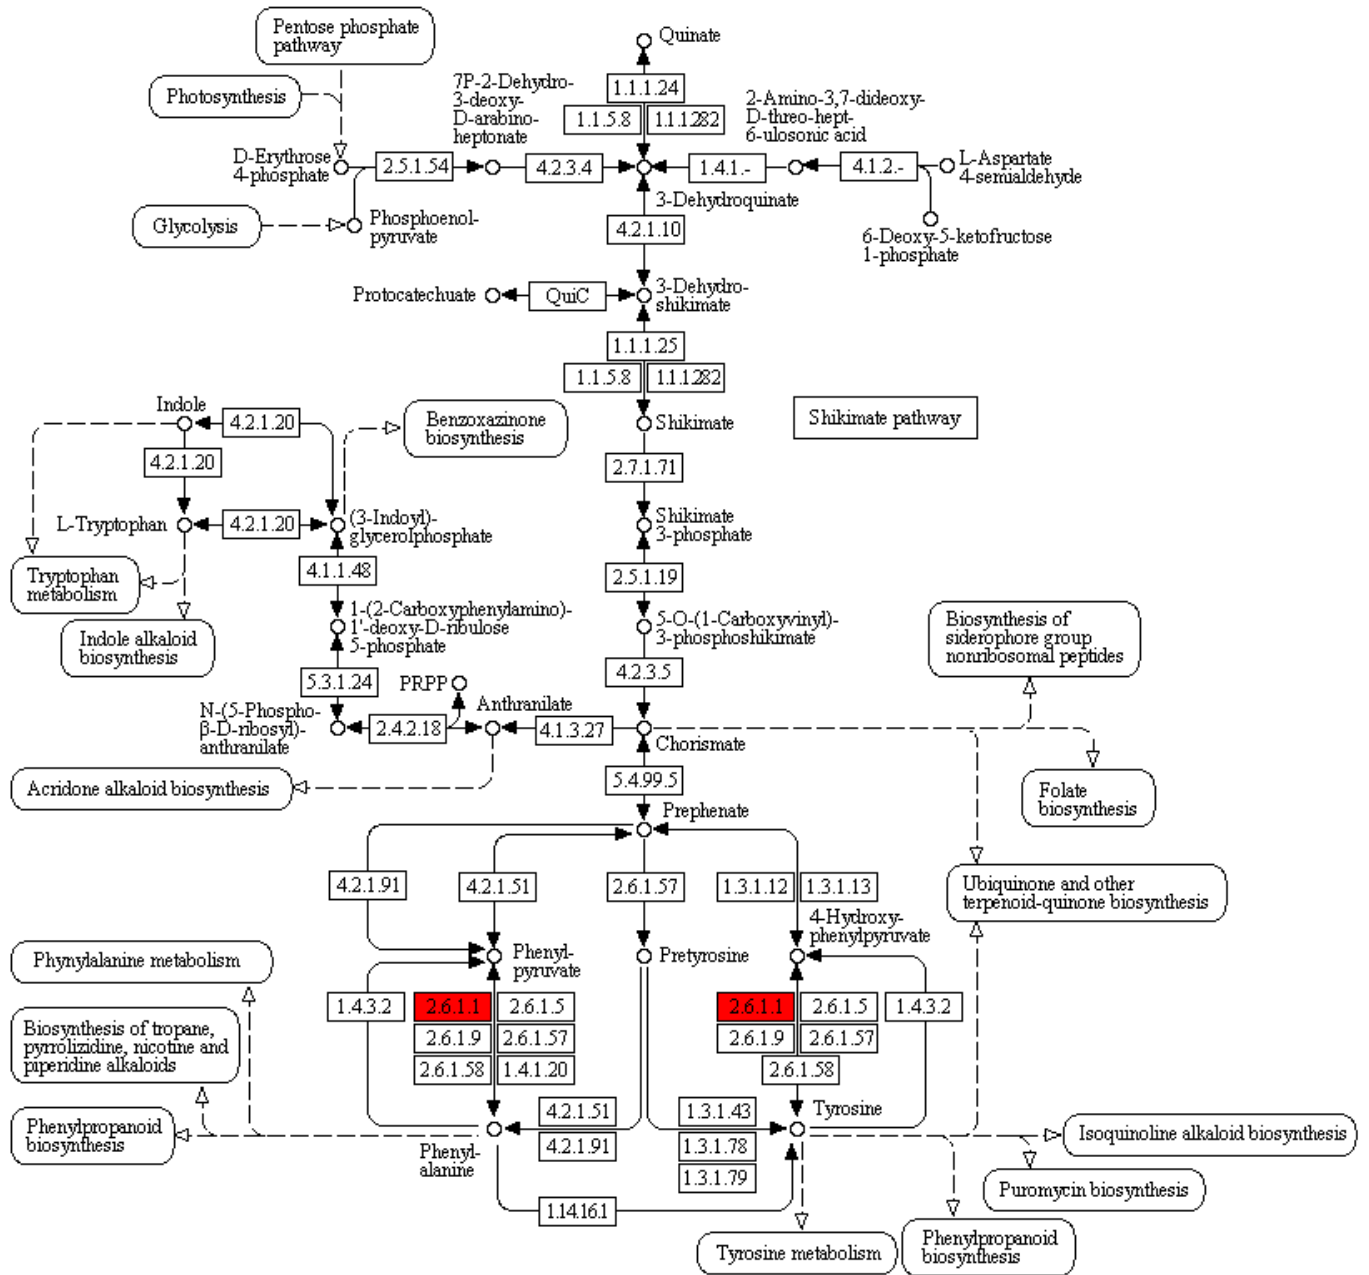

NOVOBIOCIN BIOSYNTHESIS

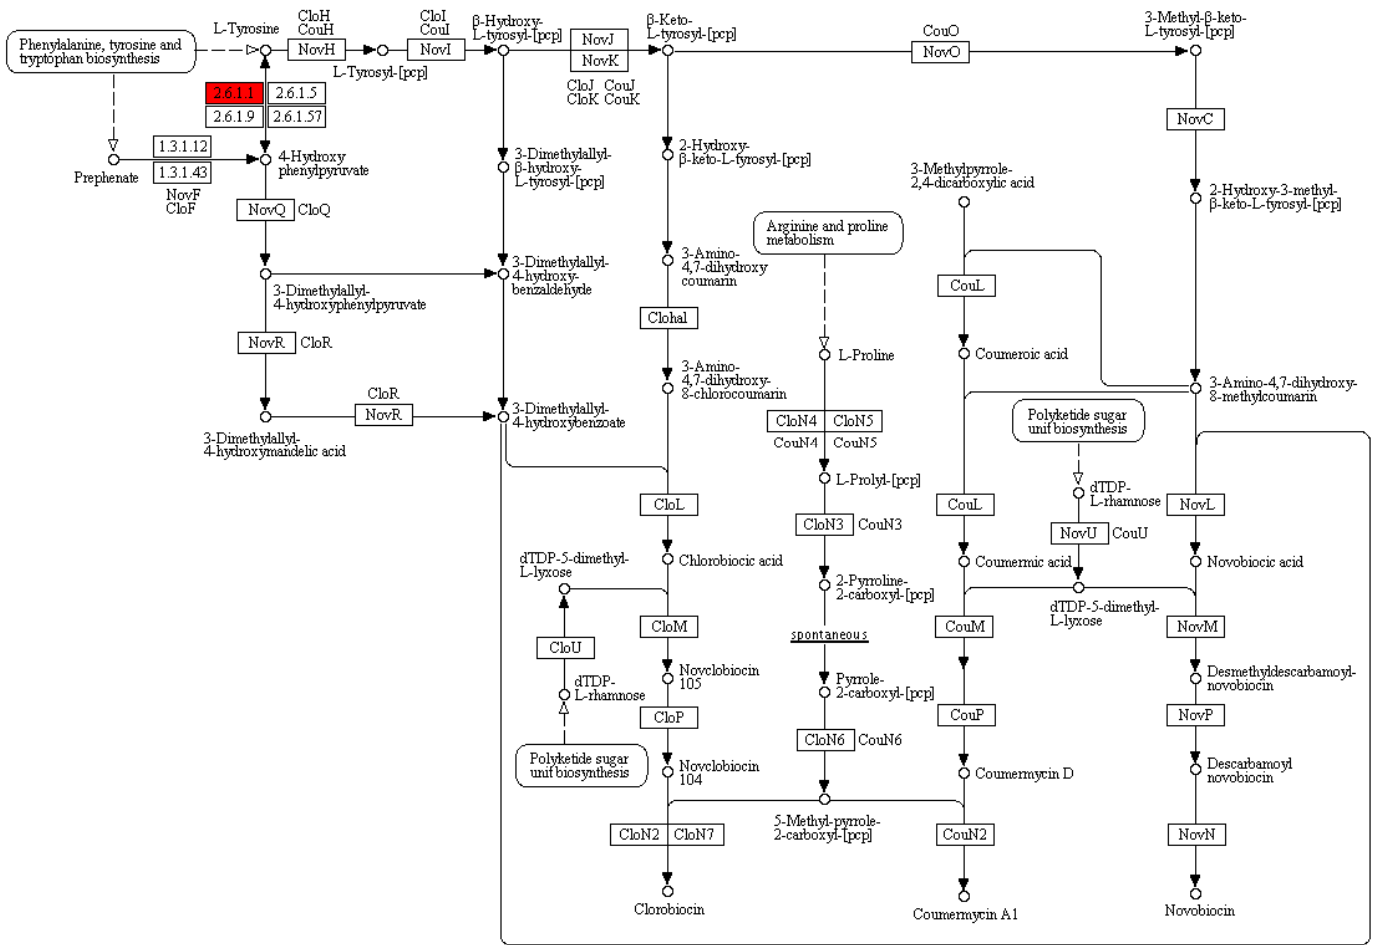



# TAURINE AND HYPOTAURINE METABOLISM

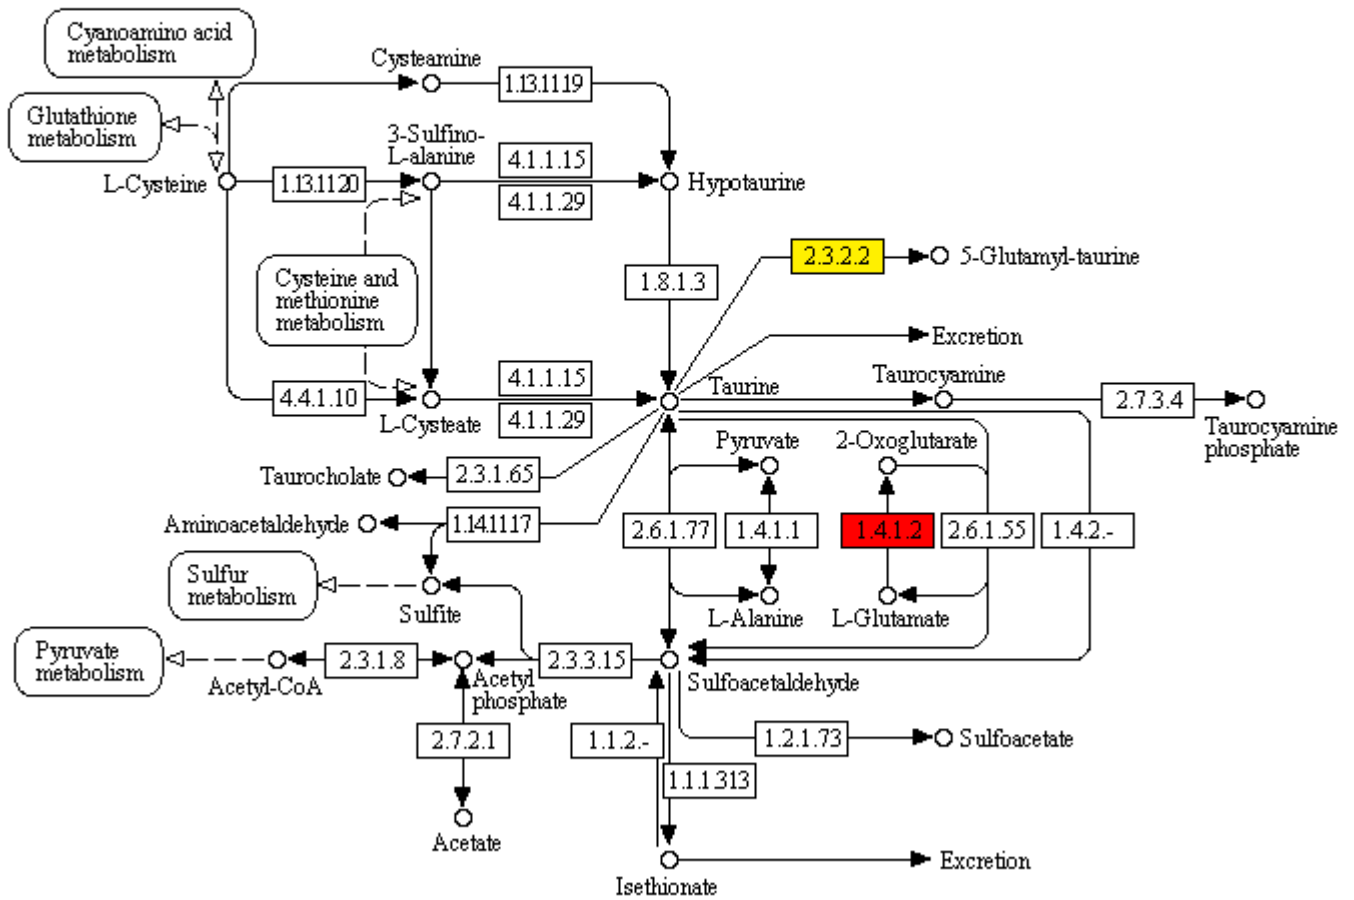

# SELENOCOMPOUND METABOLISM

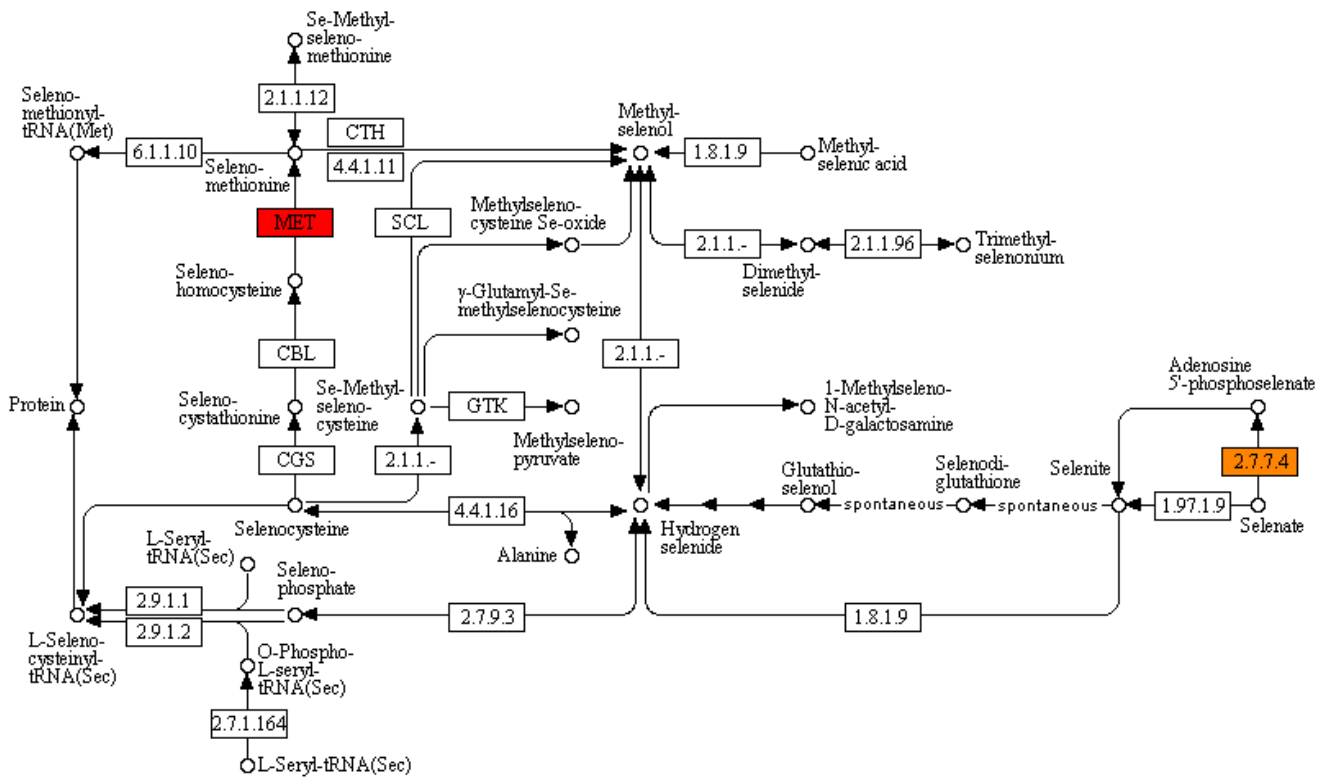



# CYANOAMINO ACID METABOLISM

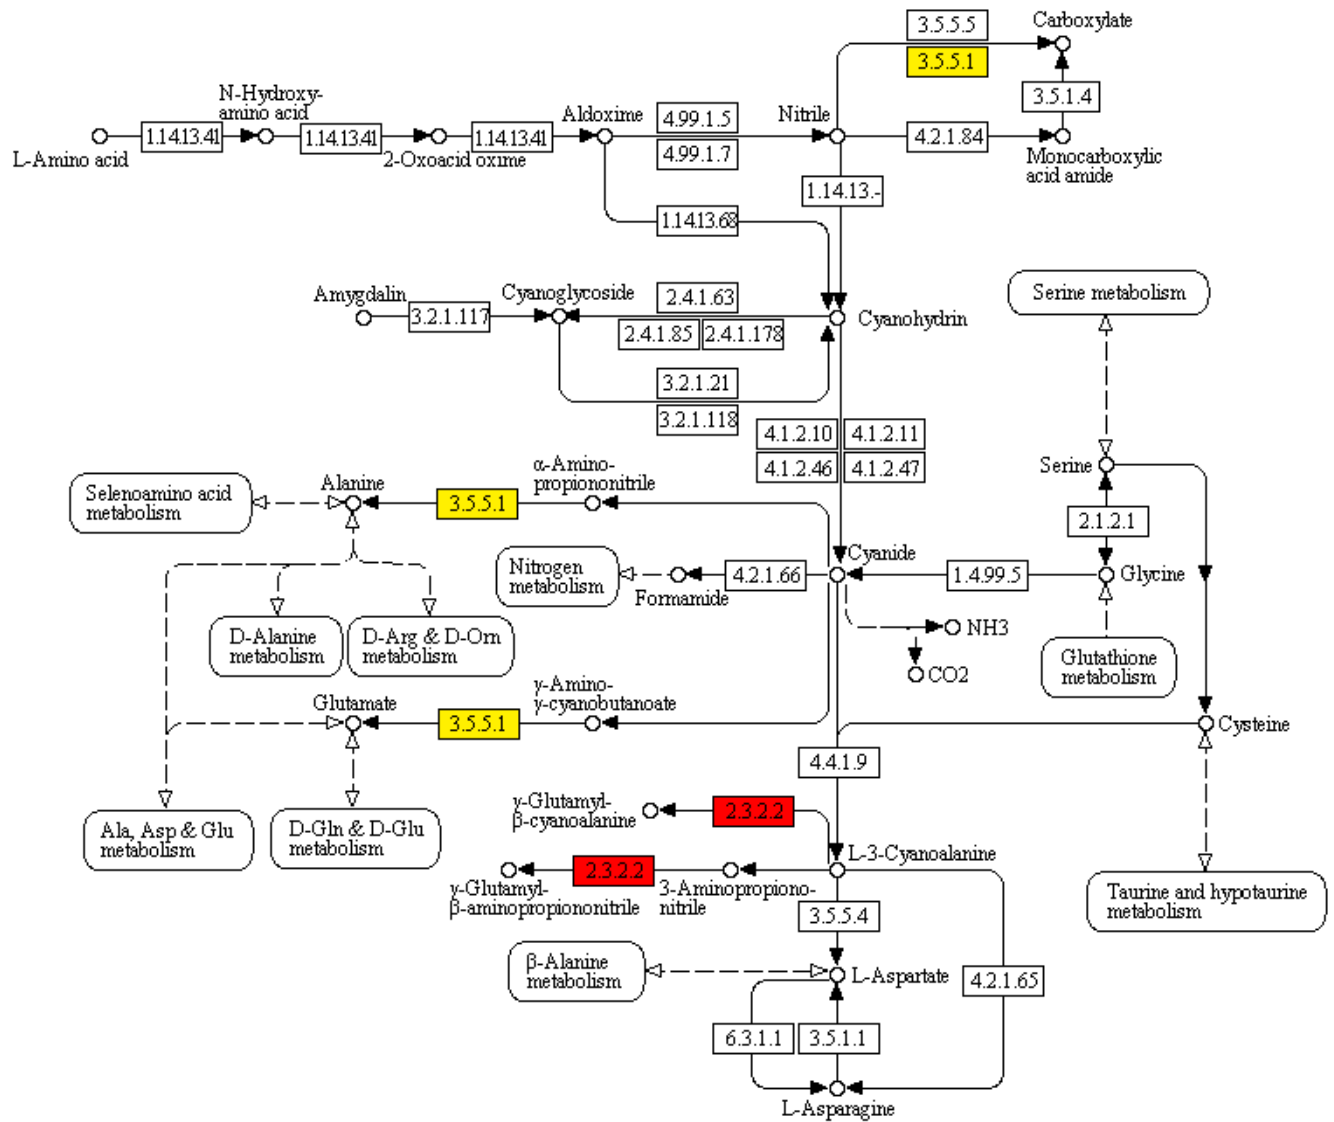

## D-GLUTAMINE AND D-GLUTAMATE METABOLISM

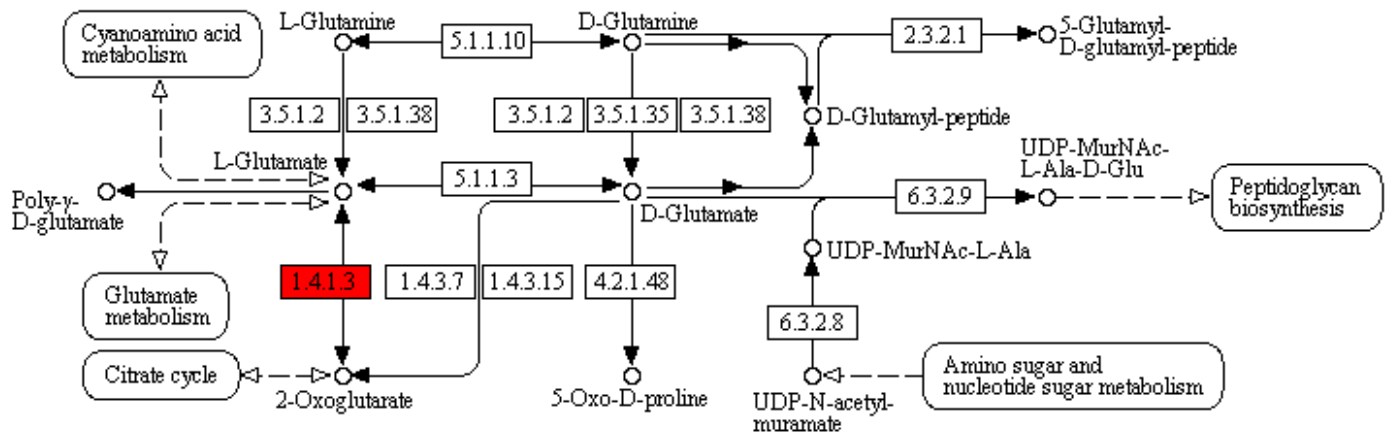





# STREPTOMYCIN BIOSYNTHESIS

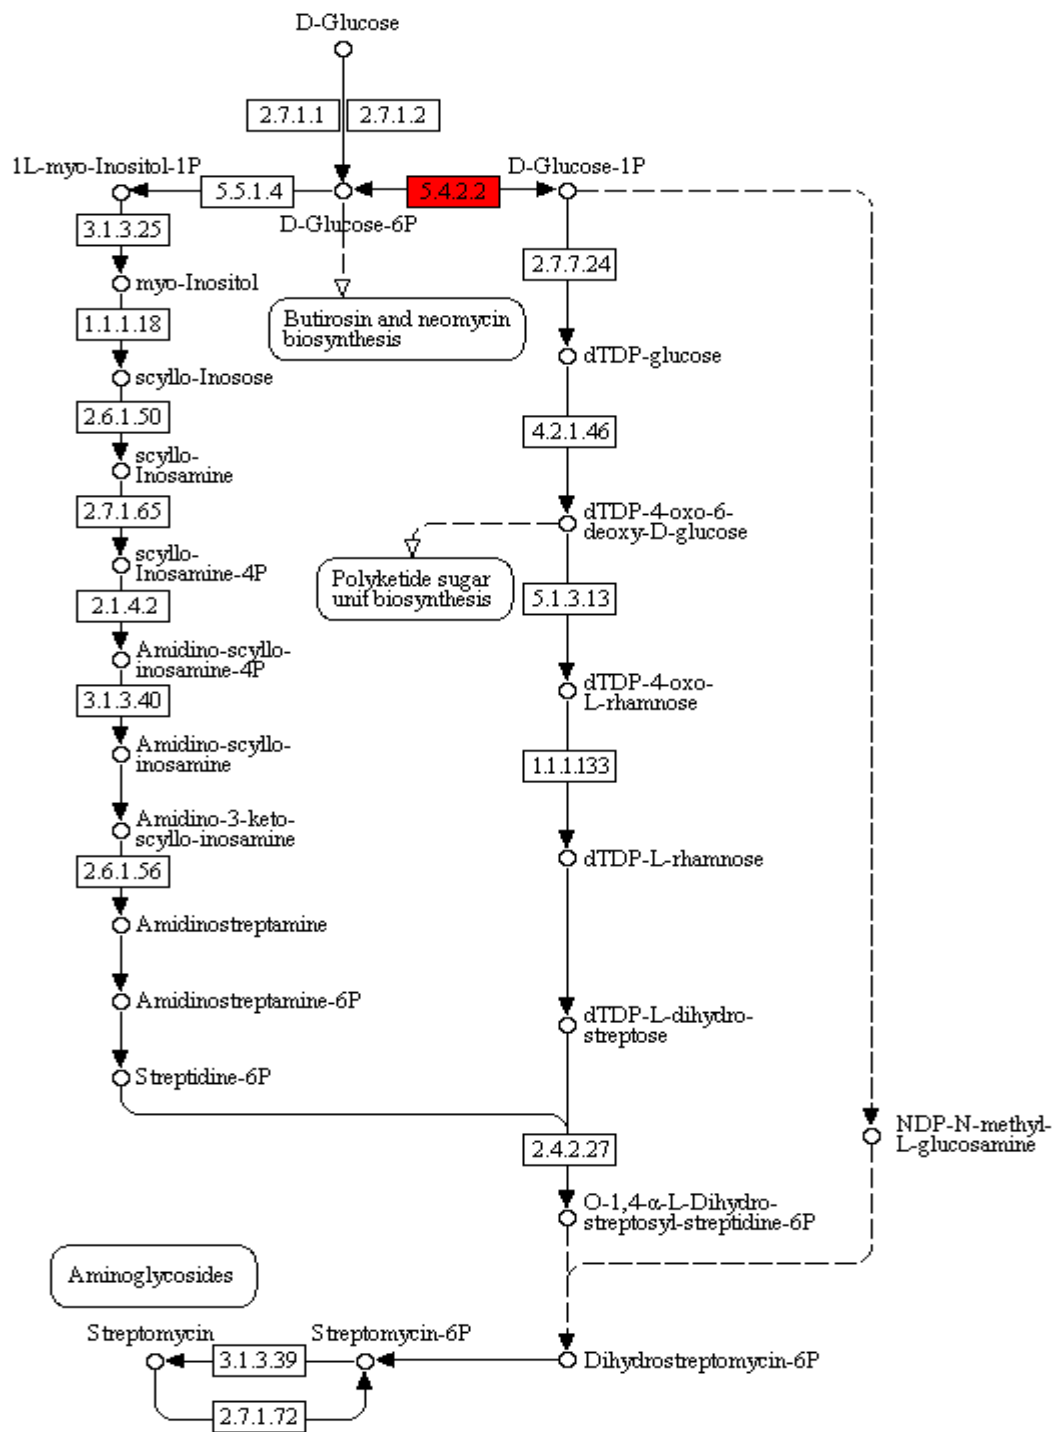

# GLYCEROLIPID METABOLISM

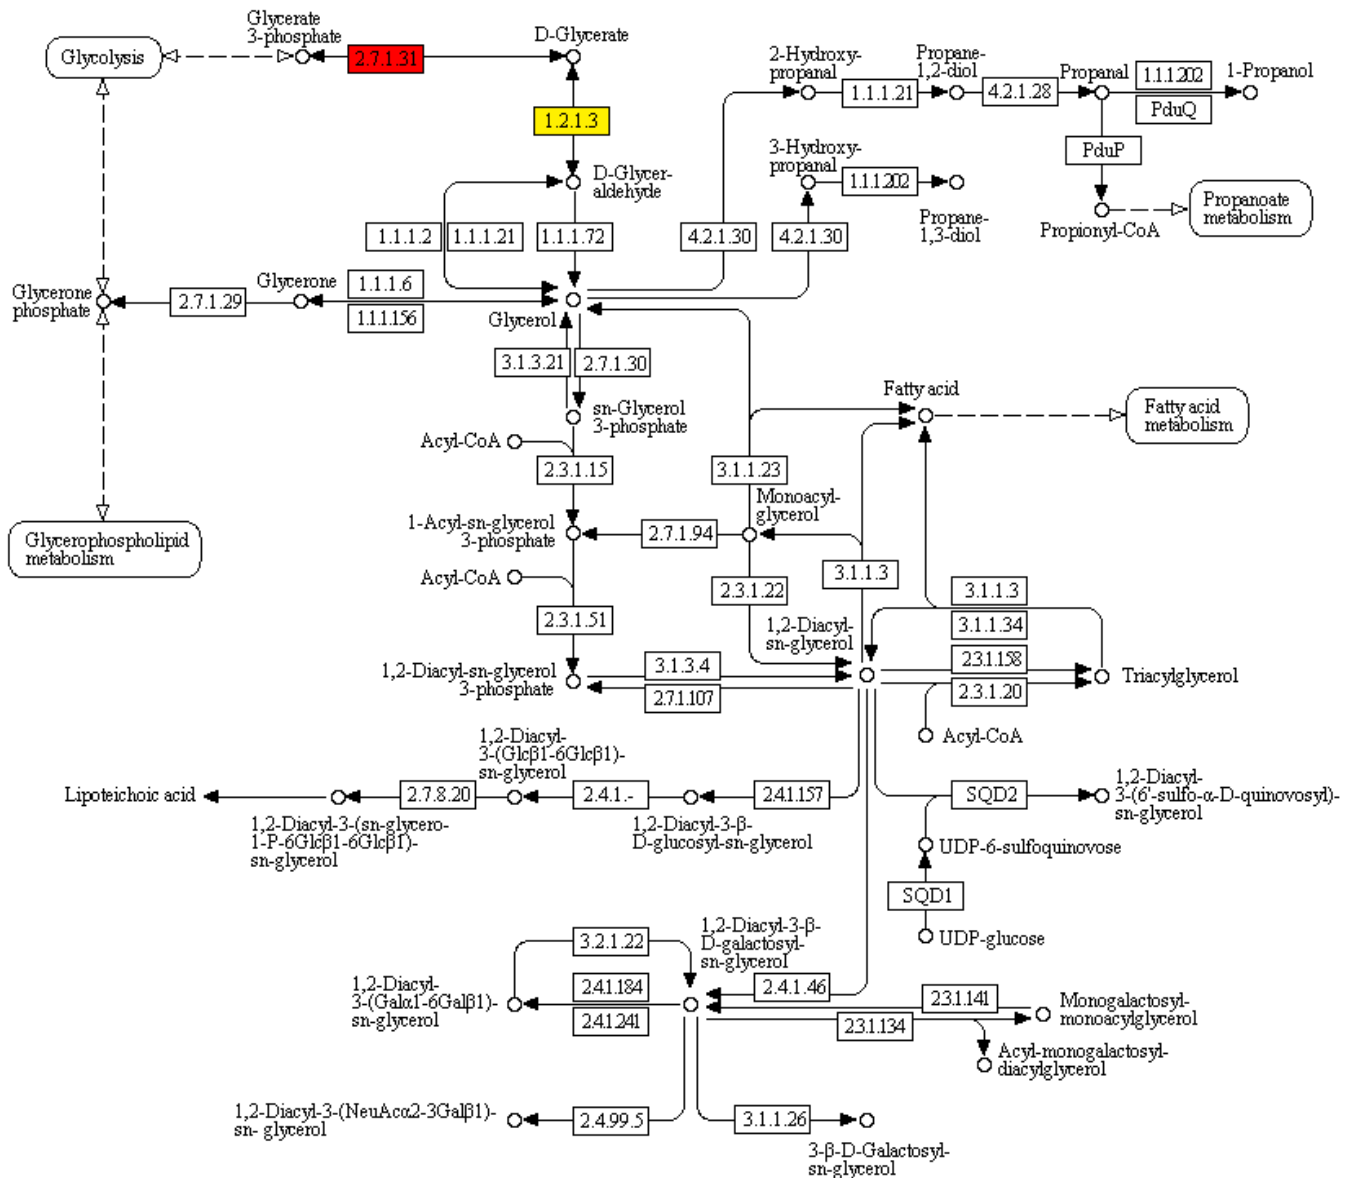



PYRUVATE METABOLISM

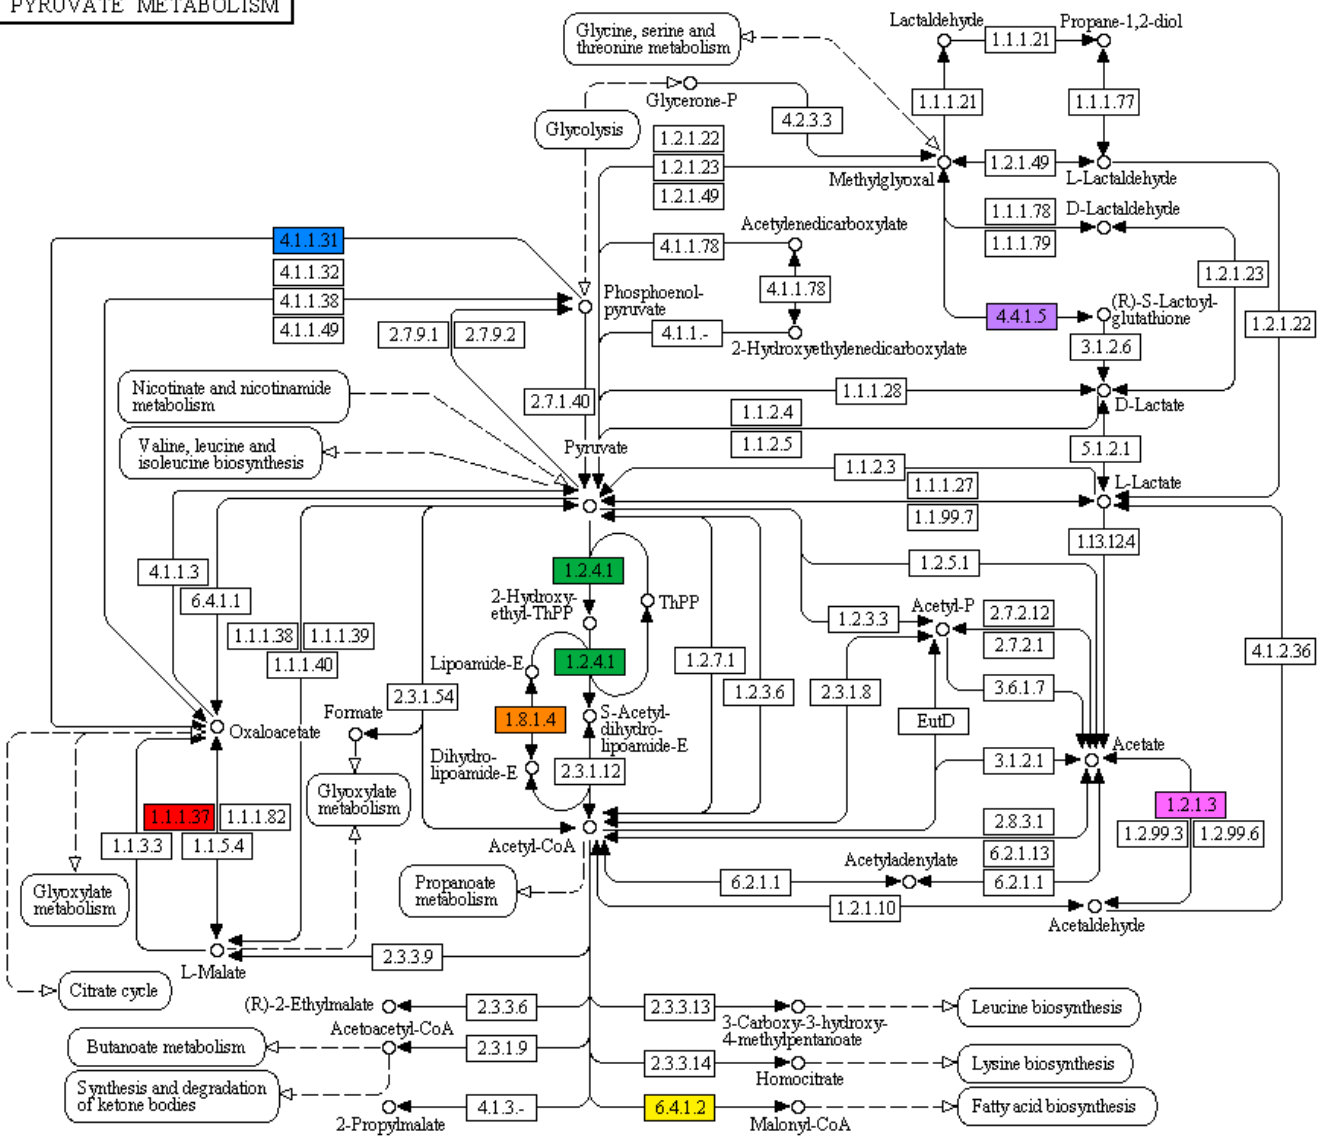



# CHLOROALKANE AND CHLOROALKENE DEGRADATION

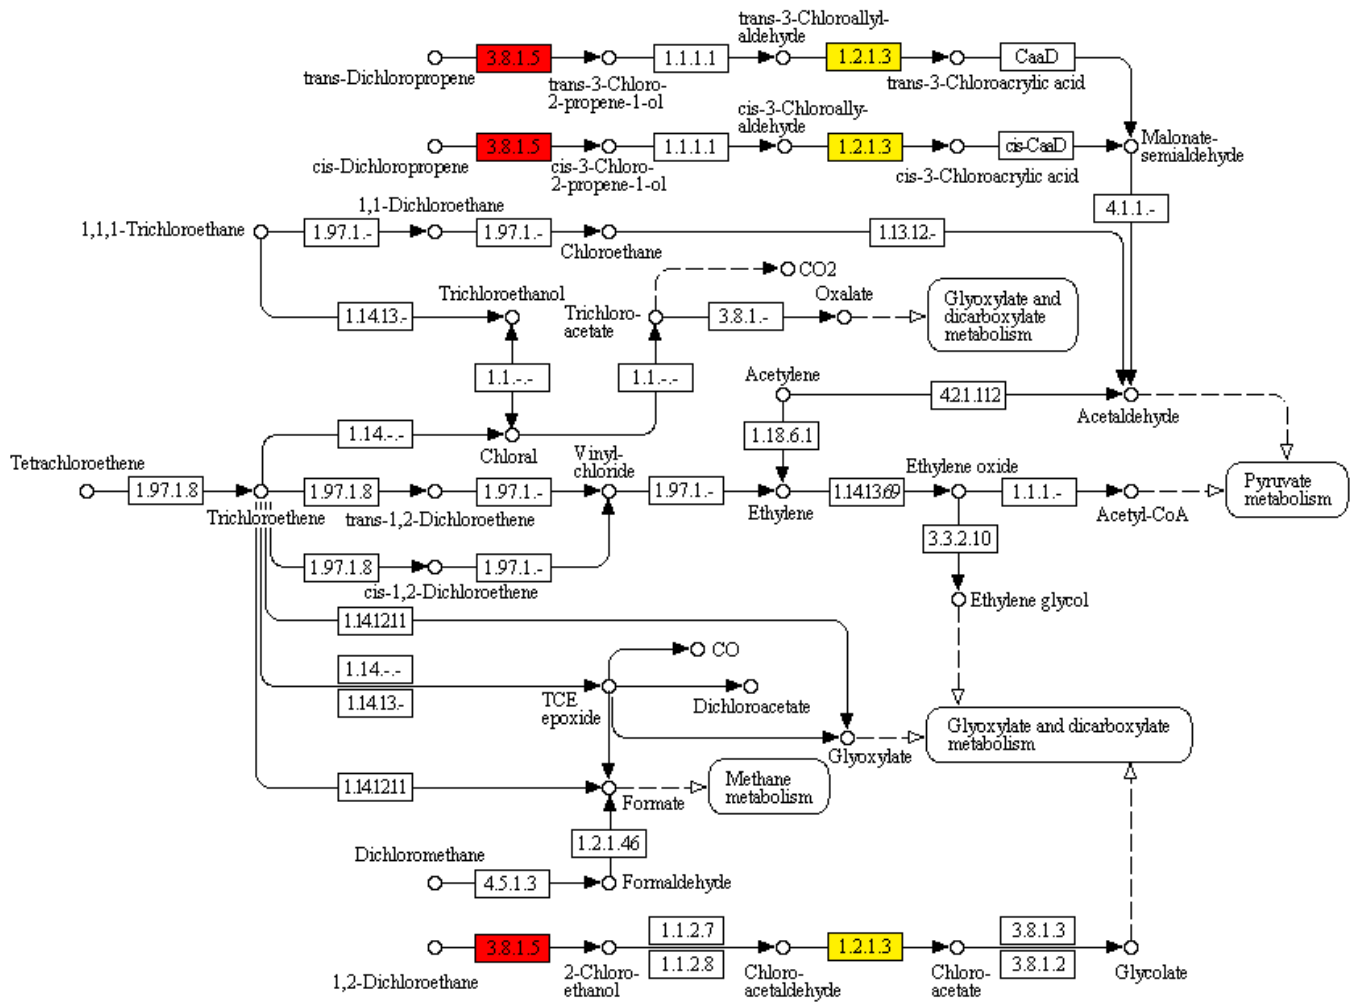



PROPANOATE METABOLISM

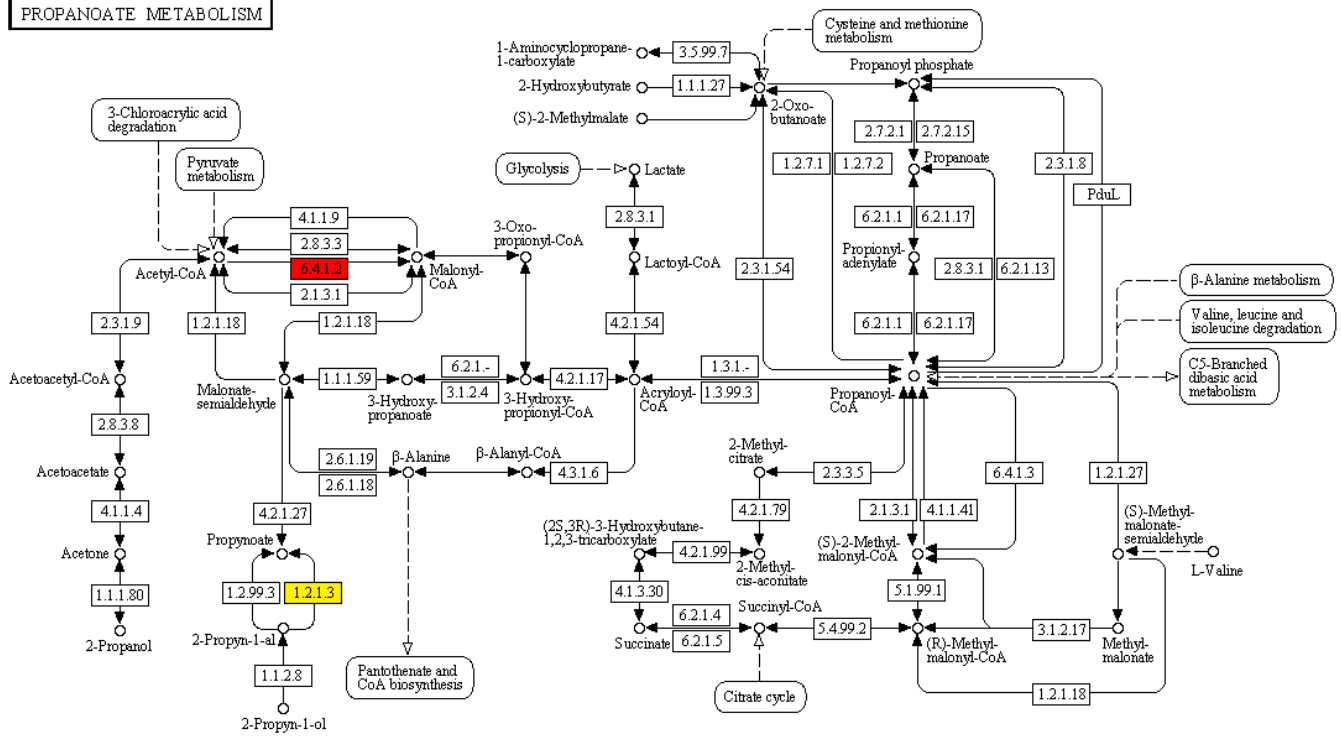

# STYRENE DEGRADATION

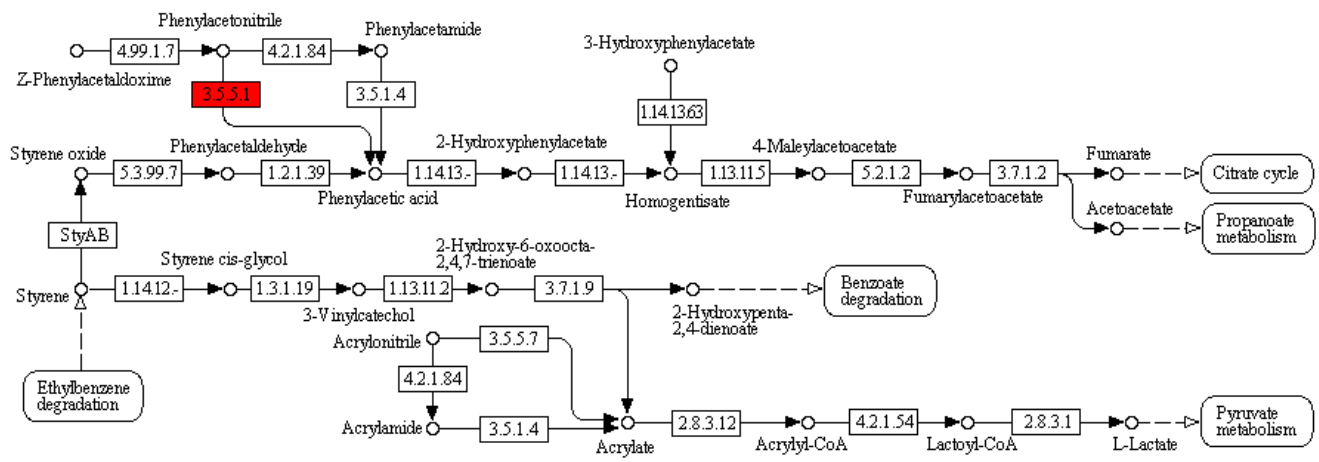



ONE CARBON POOL BY FOLATE

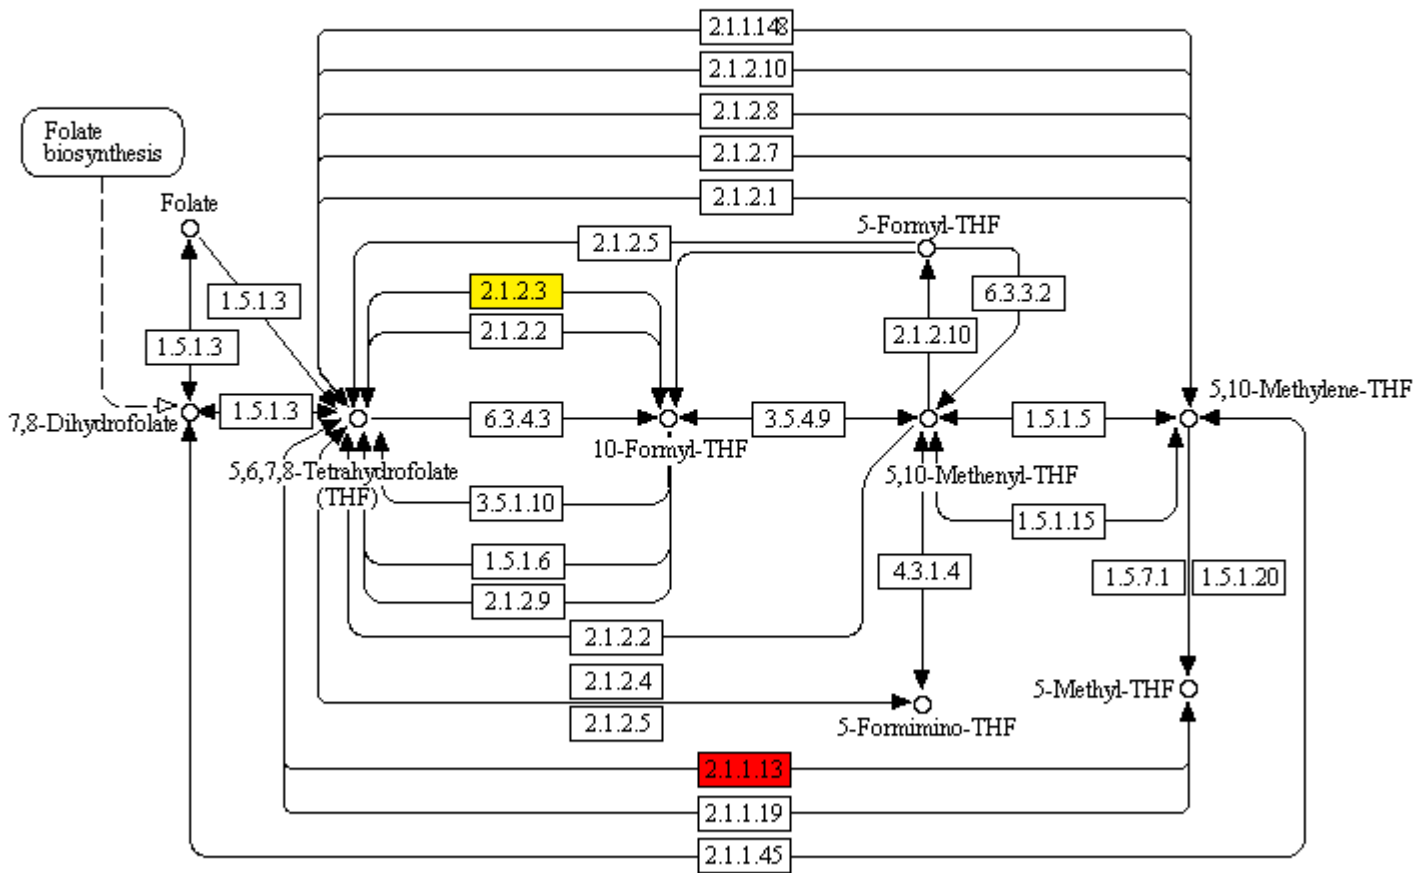

**METHANE METABOLISM**

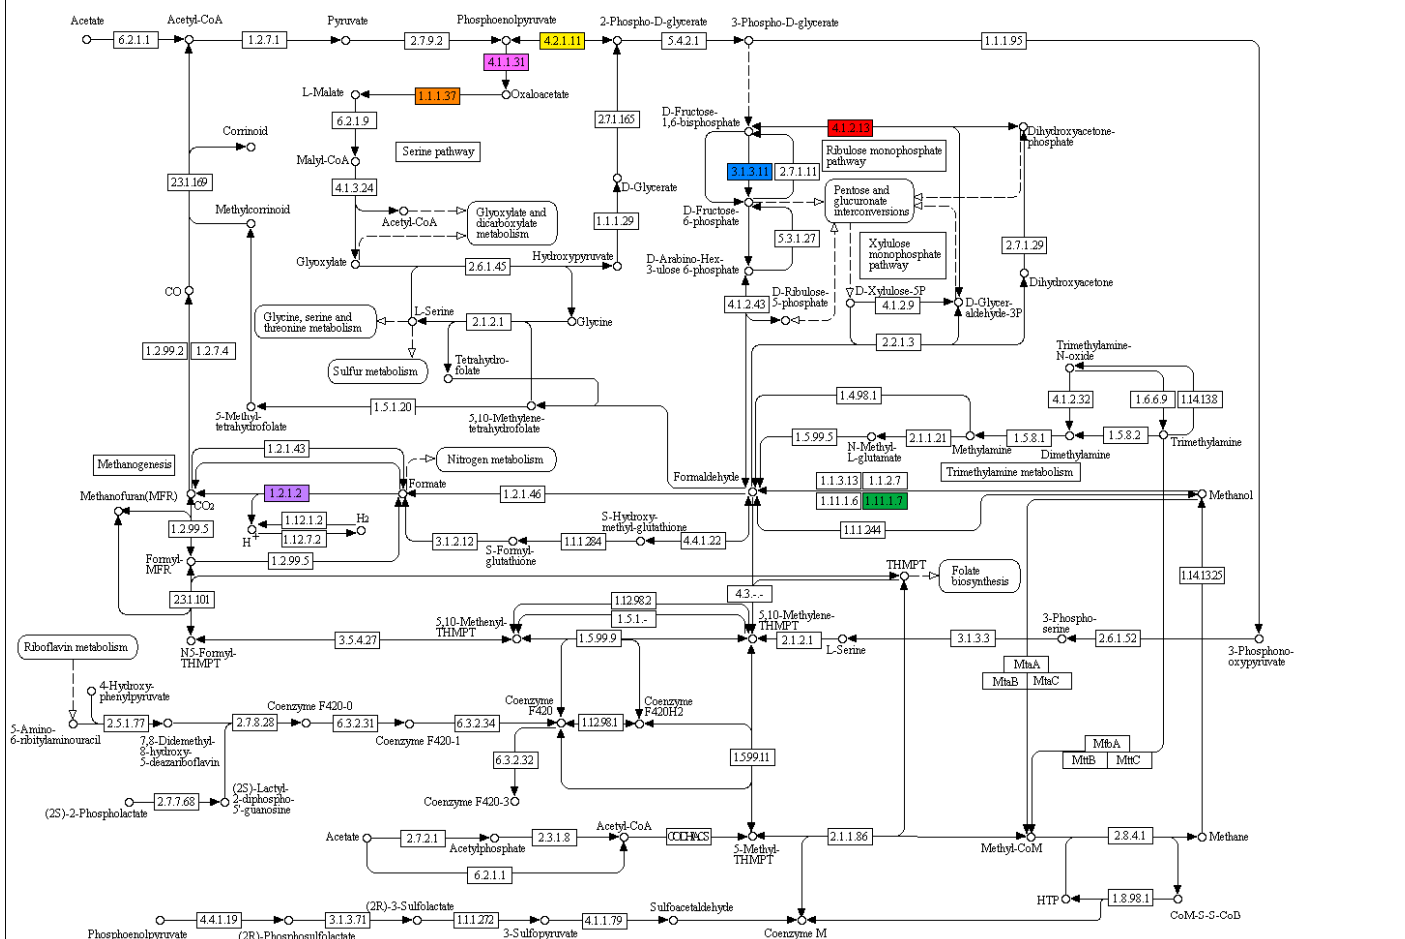

**Methanosarcinales (with cytochromes)**

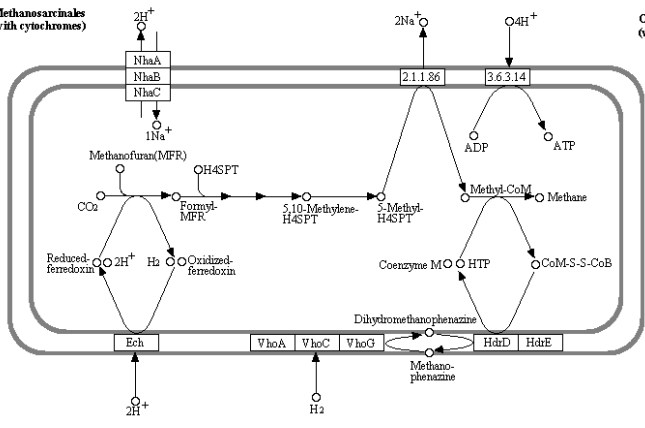

**Other methanogens (without cytochromes)**

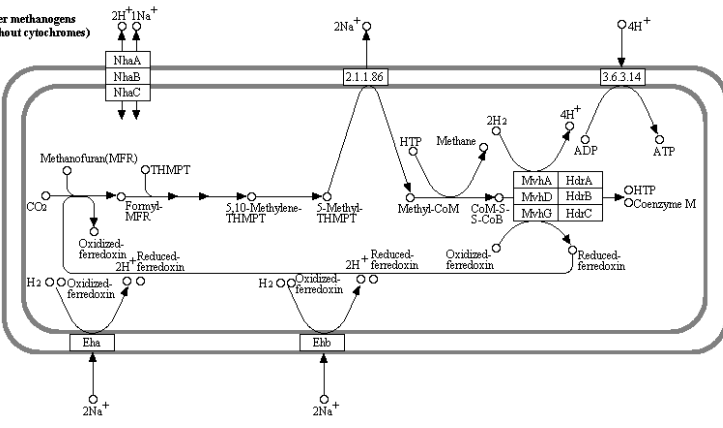





THIAMINE METABOLISM

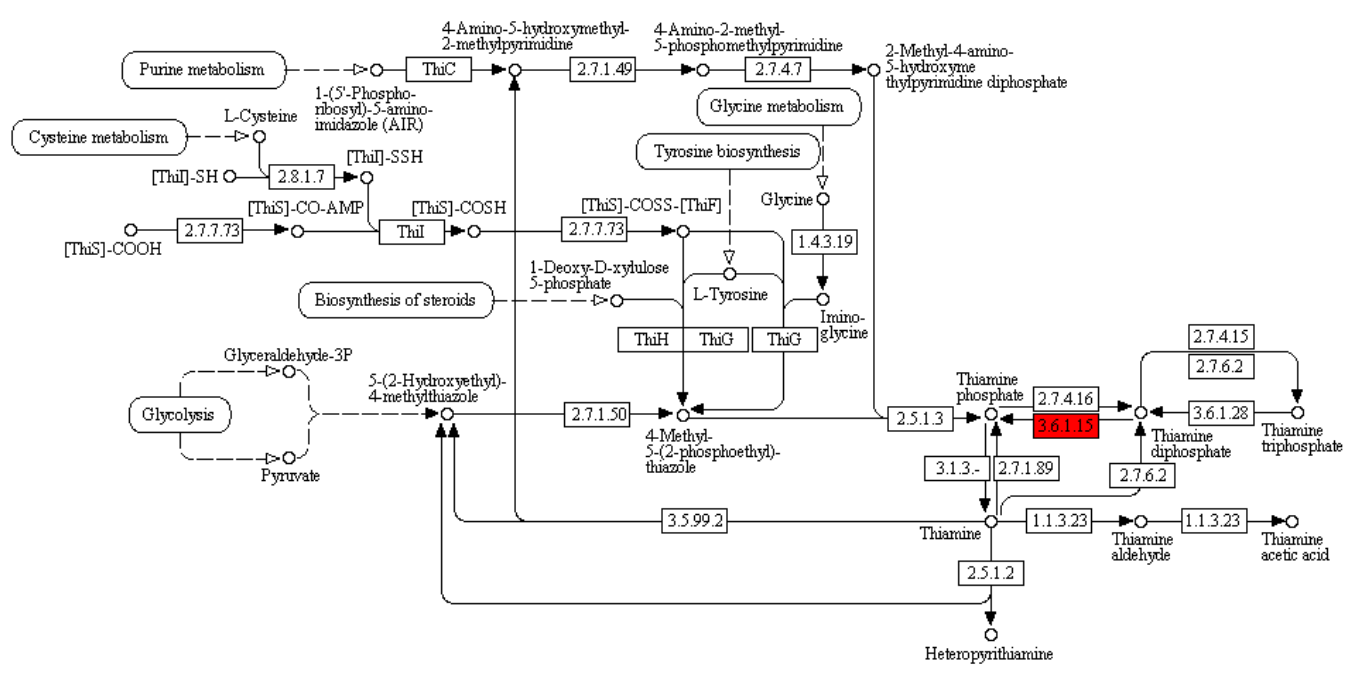

TERPENOID BACKBONE BIOSYNTHESIS

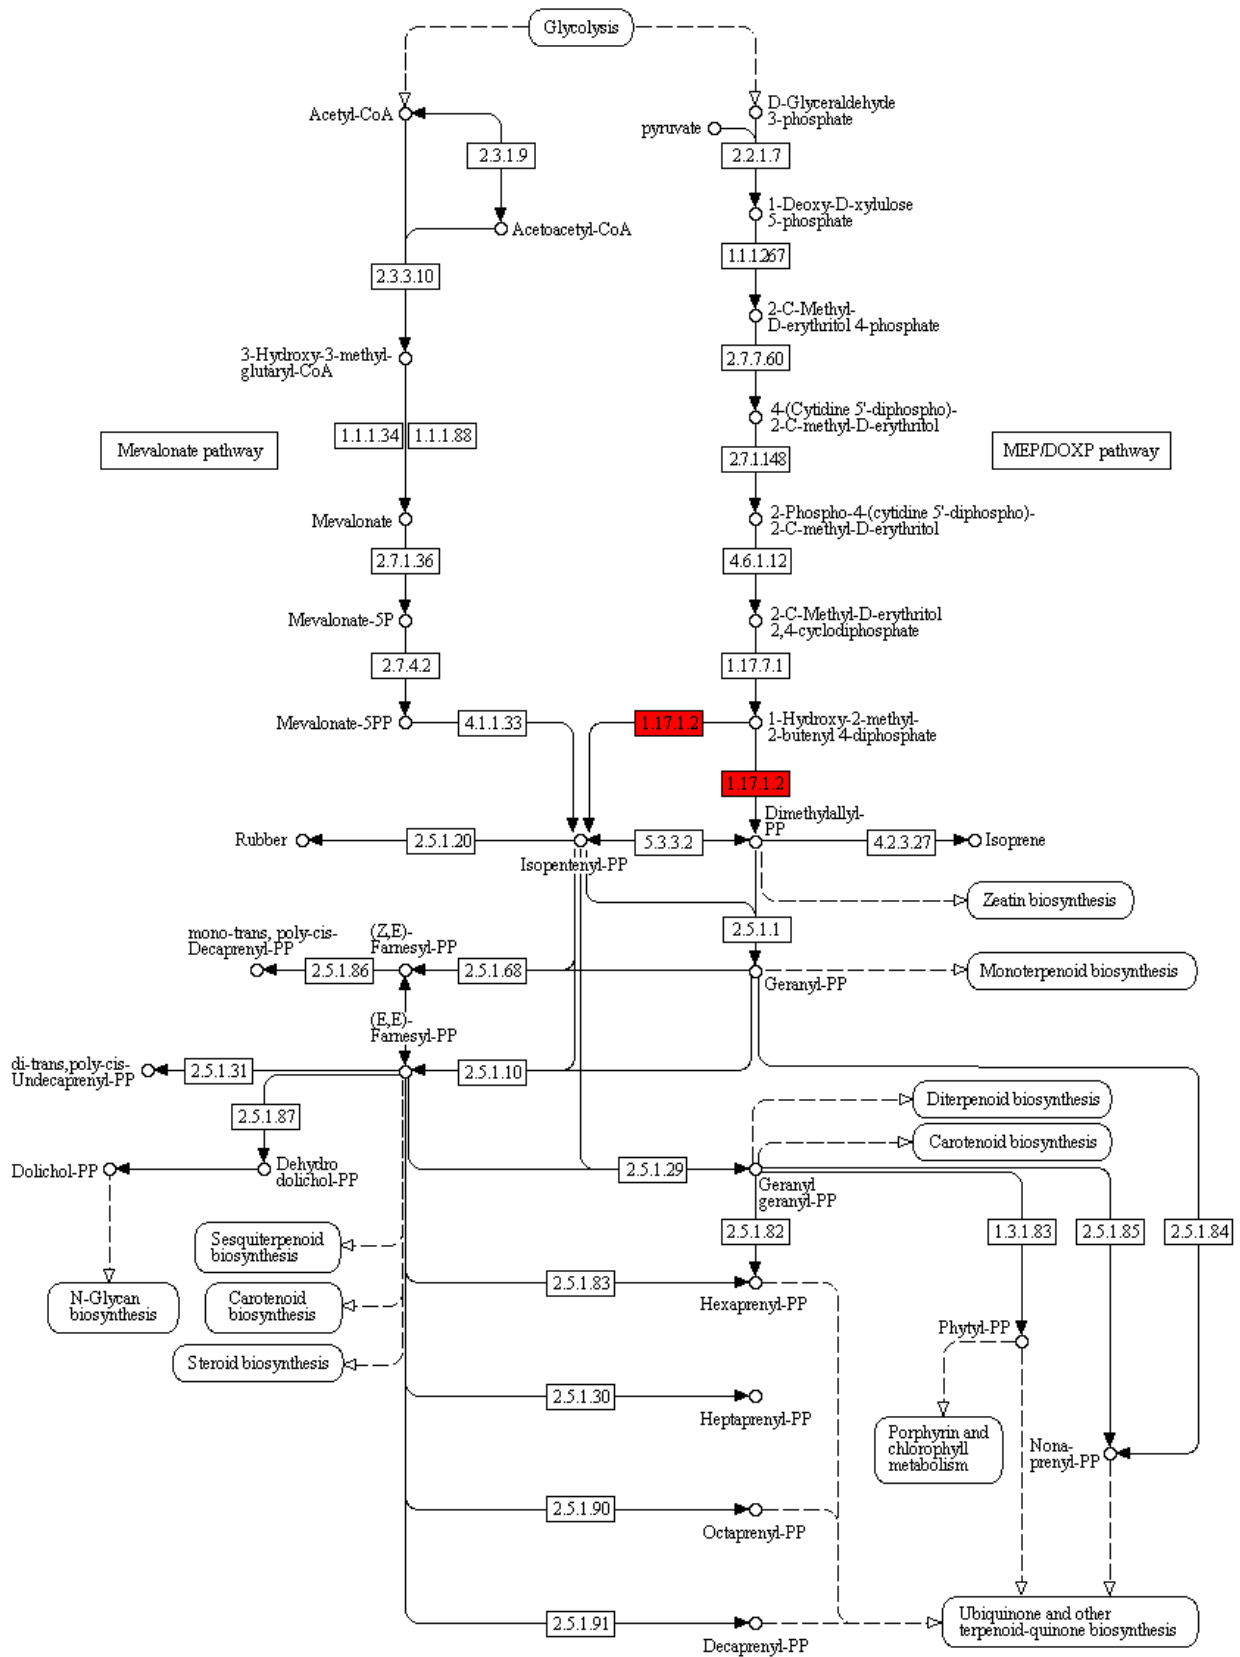

LIMONENE AND PINENE DEGRADATION

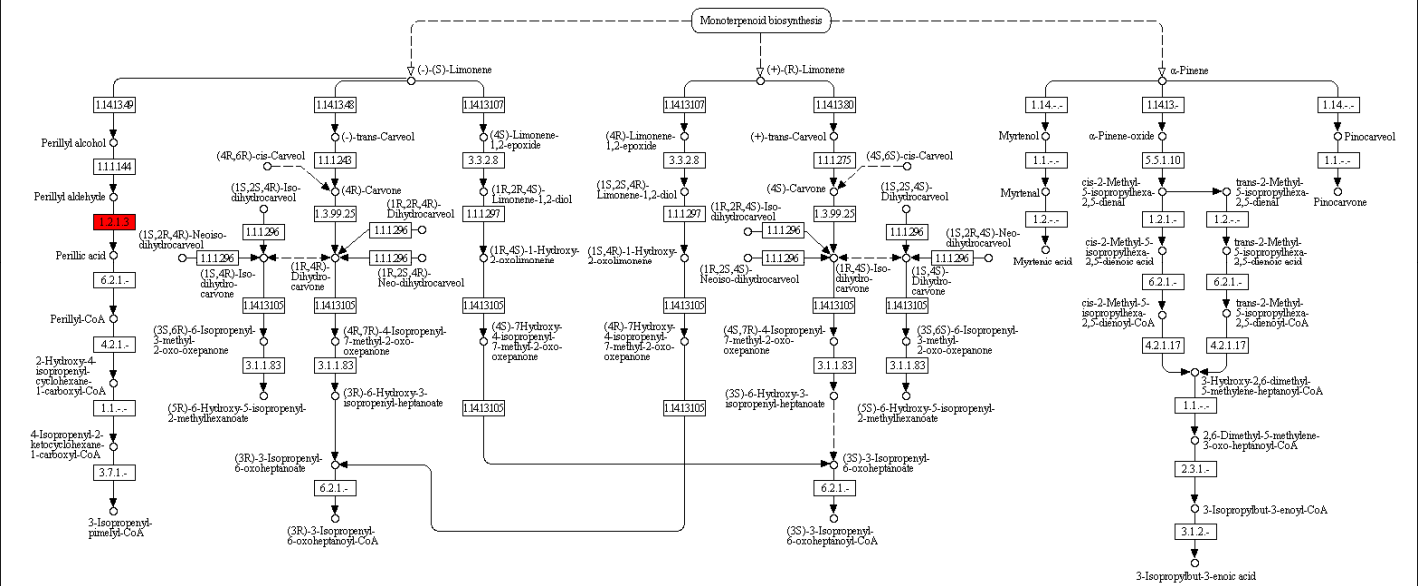



# SULFUR METABOLISM: REDUCTION AND FIXATION

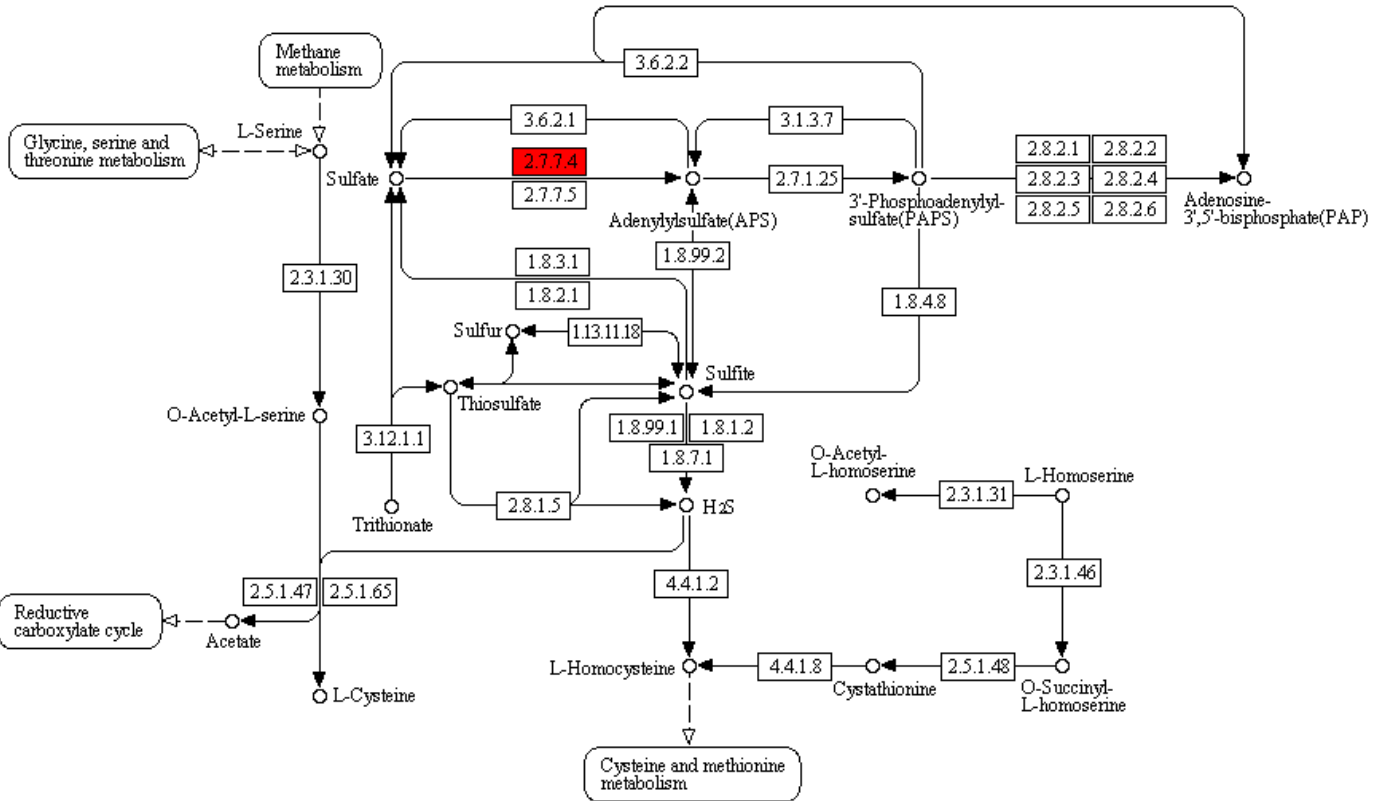

**PHENYLPROPANOID BIOSYNTHESIS**

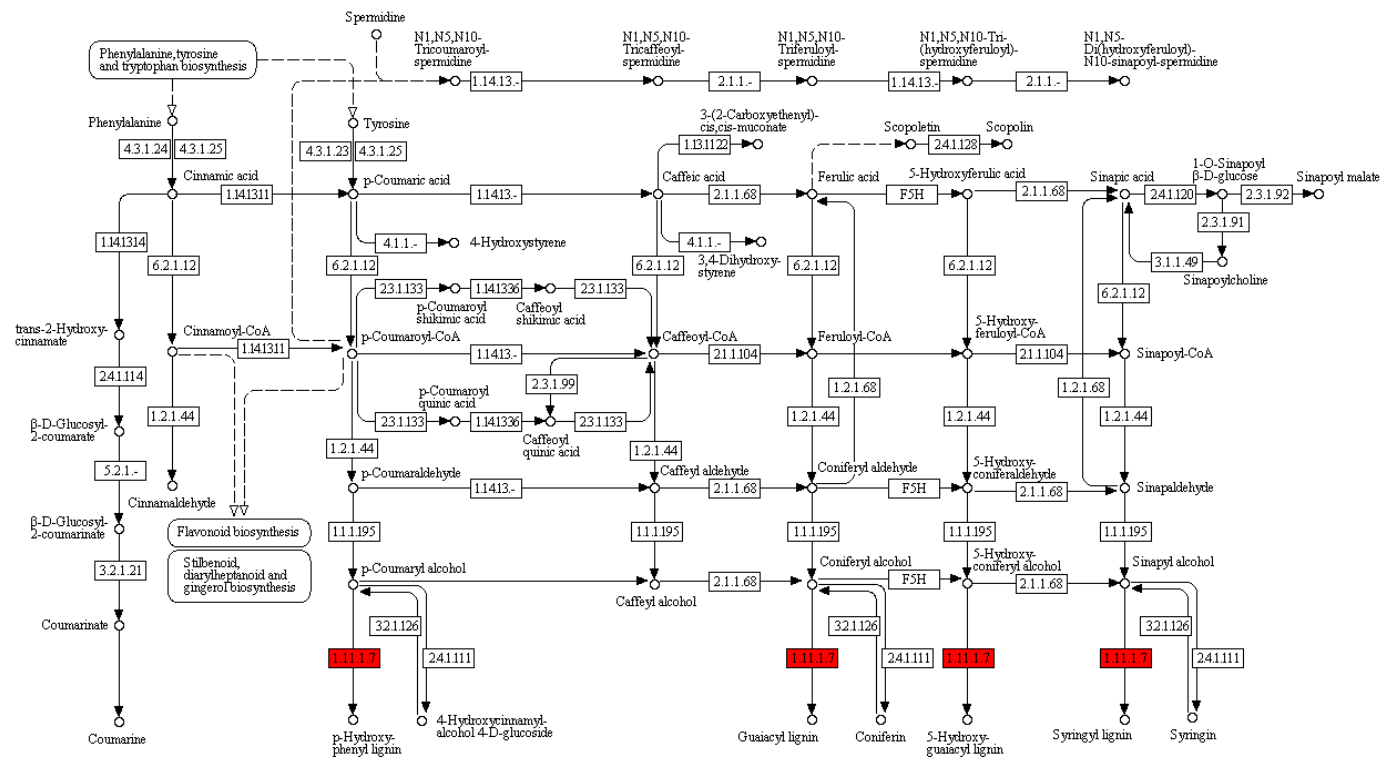



TROPANE, PIPERIDINE AND PYRIDINE ALKALOID BIOSYNTHESIS

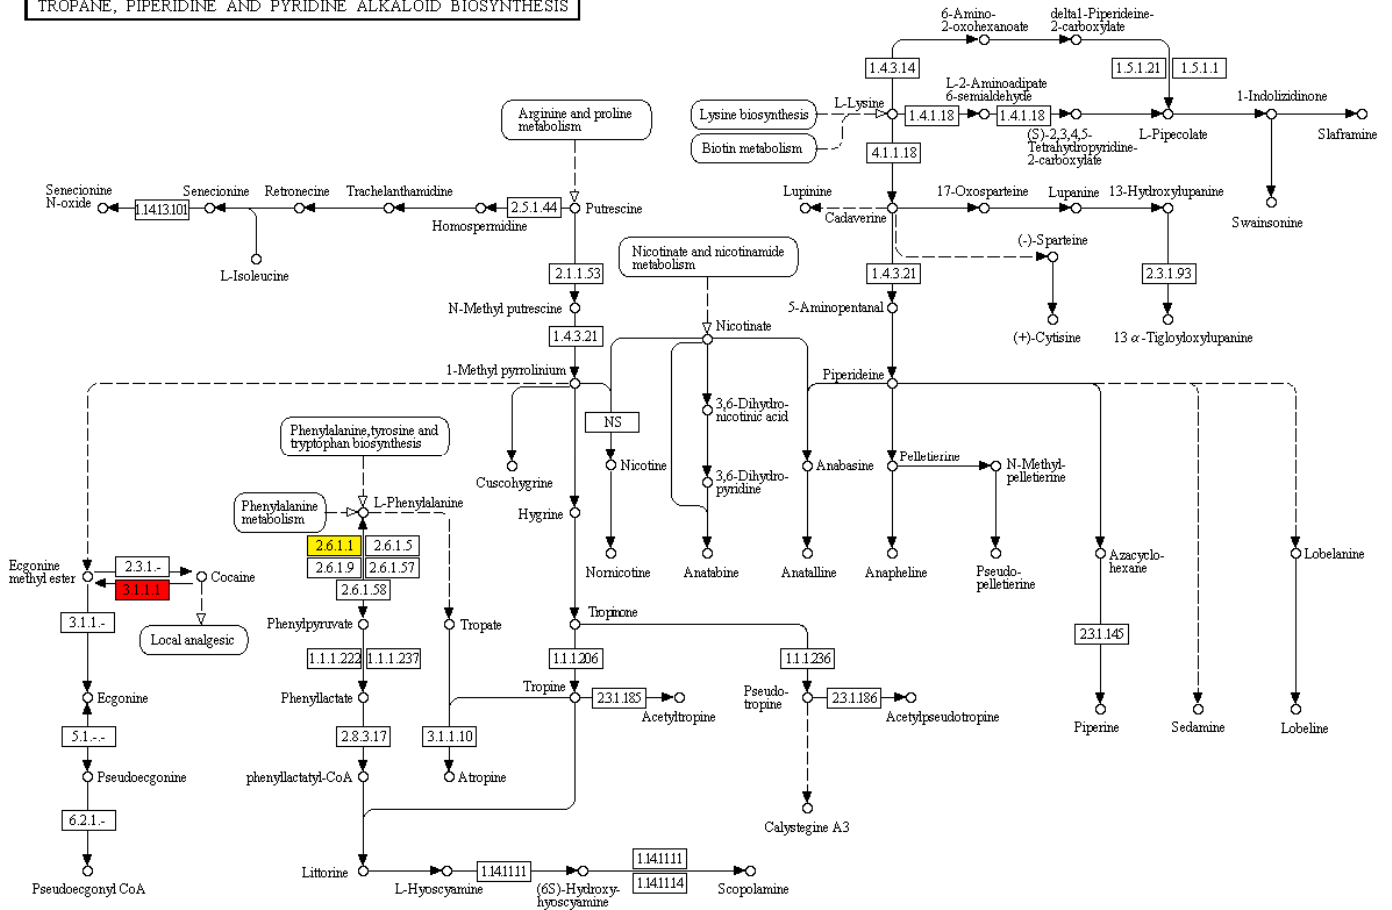



METABOLISM OF XENOBIOTICS BY CYTOCHROME P450

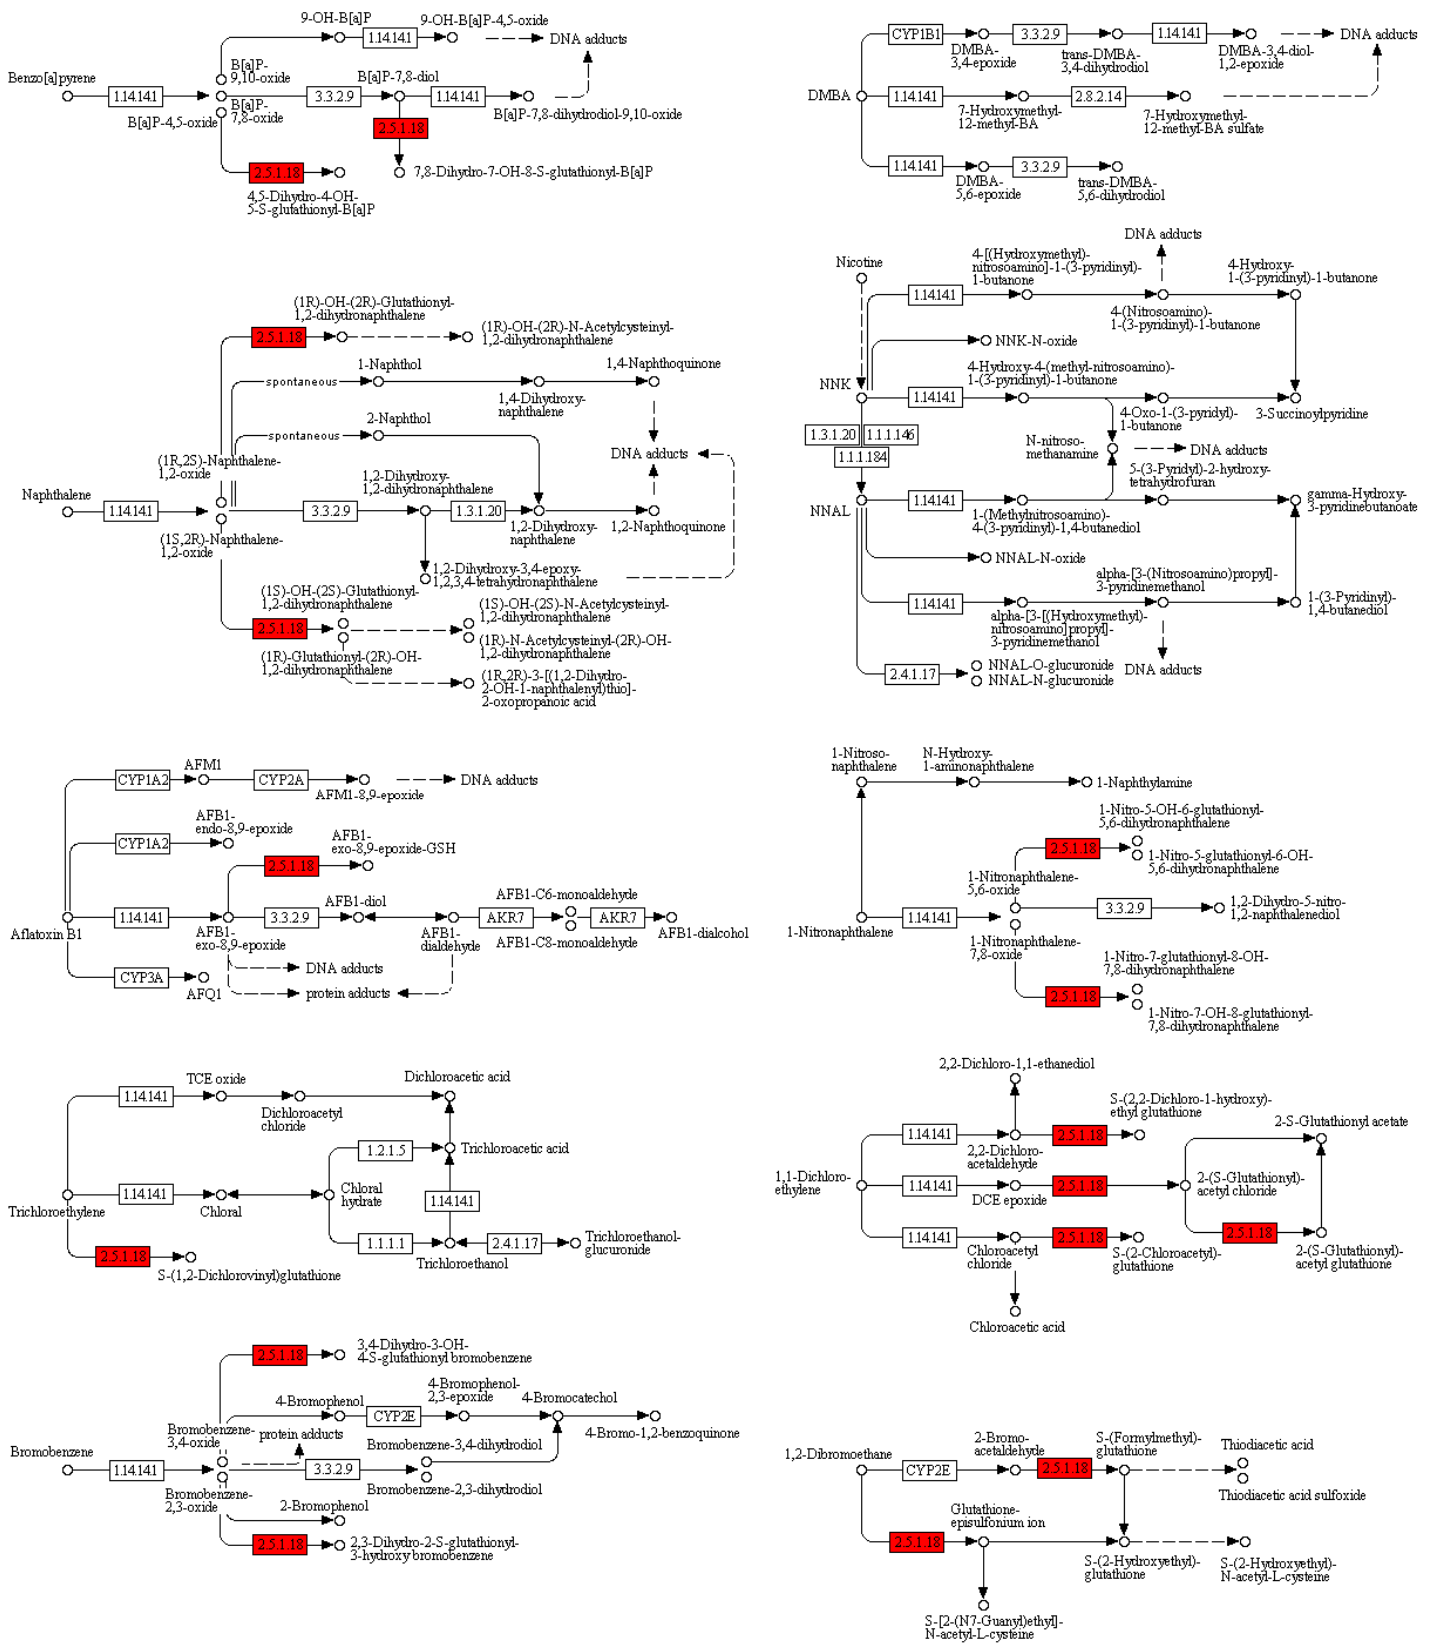

DRUG METABOLISM - CYTOCHROME P450

Tamoxifen

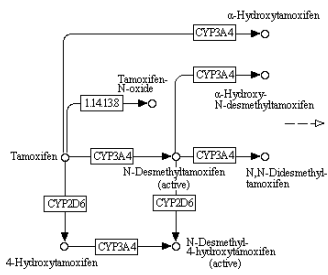

Codeine & Morphine

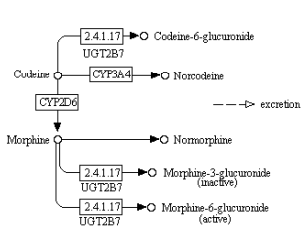

Felbamate

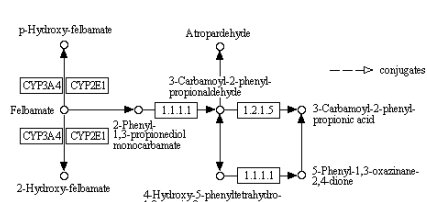

Cyclophosphamide & Ifosfamide

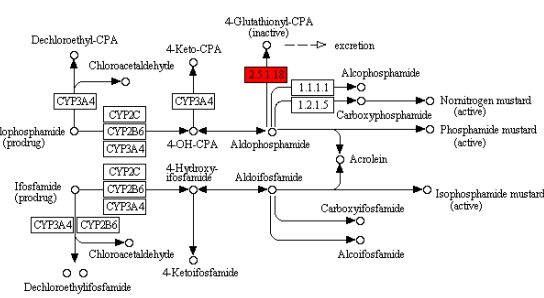

Metadone

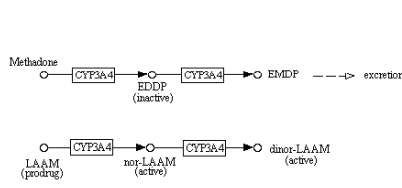

Lidocaine

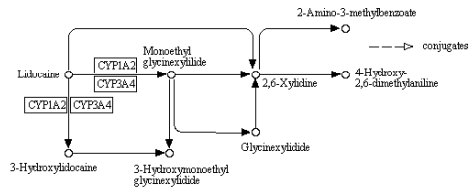

Carbamazepine & Oxcarbazepine

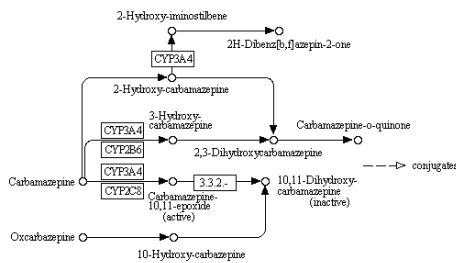

Valproic acid

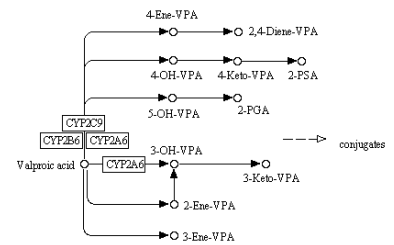

**DRUG METABOLISM - OTHER ENZYMES**

**Azathioprine & 6-Mercaptopurine**

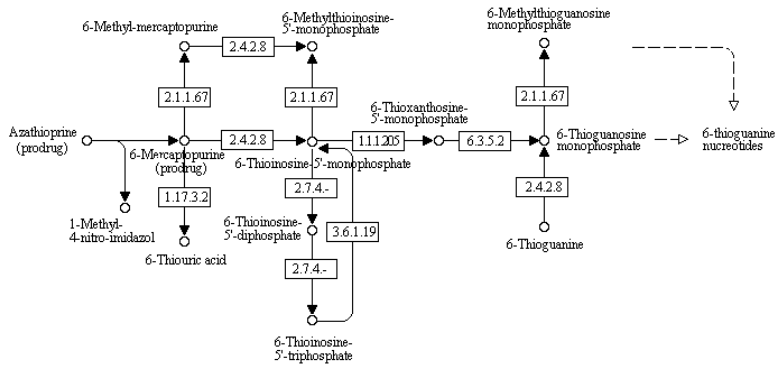

**Fluorouracil**

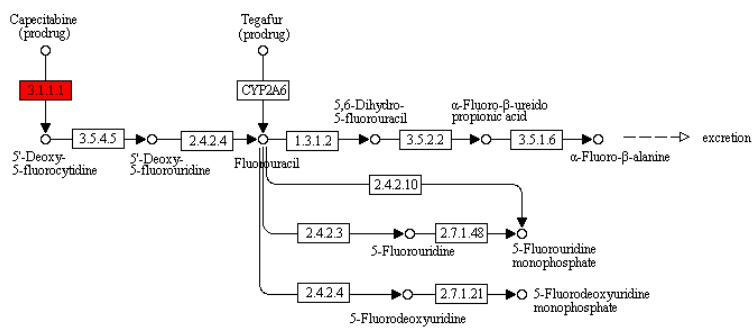

**Irinotecan**

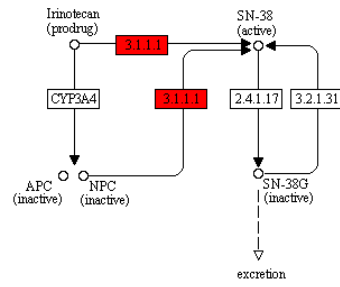

**Isoniazid**

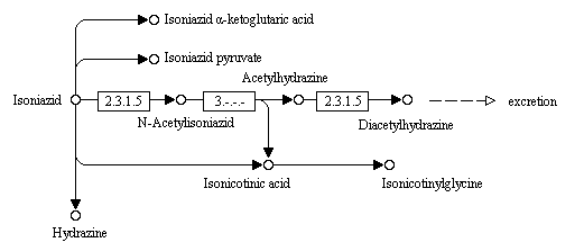



**BIOSYNTHESIS OF PLANT HORMONES**

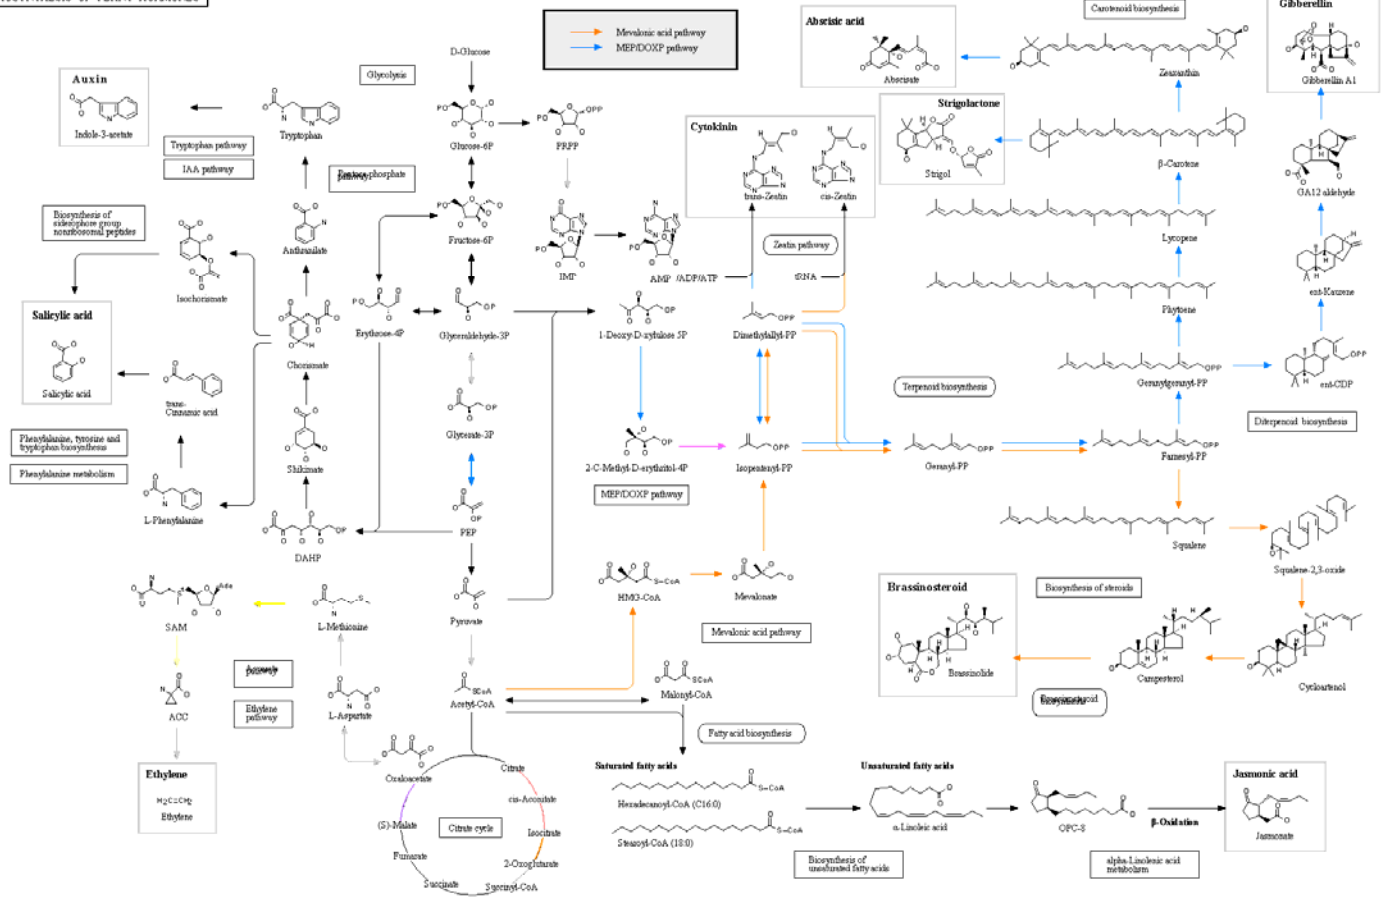

Supplement: supp_M112.022475_mcp.M112.022475-6.pdf [file supp_M112.022475_mcp.M112.022475-6.pdf]
