# Supplementary material
Source: PubMed Central journal article supplement (PMC3734578)
Supplement: supp_M112.022475_mcp.M112.022475-1.pdf [file supp_M112.022475_mcp.M112.022475-1.pdf]

## **Supplemental legends**

**Suppl Data 1**, relative weight of different elements.

**Suppl Data 2**, 2-DE gels of different NaCl treated plant leaves.

**Suppl Data 3**, information for differential protein spots on 2-DE gels and the corresponding collected MS identities.

**Suppl Data 4**, detail information for protein identification with MALDI TOF MS.

**Suppl Data 5**, Blast2go analysis results of the identified proteins.

**Suppl Data 6**, the main pathways involved in salt tolerance of *Thellungiella*.

**Suppl Data 7**, the salt responsive genes changed more than 2.0 folds under salinity.

**Suppl Data 8**, determination of gene expression patterns for the identified proteins.

**Suppl Data 9**, the primers used in the RT-PCR and qRT-PCR analysis.

**Suppl Data 1, Table 1**

Relative weight of different elements in cross-section of leaves from different concentrations of NaCl treated salt cress (mean  $\pm$ SD; n $\geq$ 5).

| <b>NaCl</b> | <b>Tissues</b> | <b>O</b>            | <b>Na</b>           | <b>Mg</b>          | <b>P</b>           | <b>S</b>            | <b>Cl</b>           | <b>K</b>            | <b>Ca</b>           |
|-------------|----------------|---------------------|---------------------|--------------------|--------------------|---------------------|---------------------|---------------------|---------------------|
| <b>0</b>    | leaf           | 34.09<br>$\pm$ 2.12 | 1.82<br>$\pm$ 0.45  | 2.01<br>$\pm$ 0.23 | 0                  | 10.81<br>$\pm$ 1.08 | 3.13<br>$\pm$ 0.46  | 16.89<br>$\pm$ 1.55 | 31.24<br>$\pm$ 3.61 |
| <b>200</b>  | leaf           | 28.52<br>$\pm$ 3.54 | 7.69<br>$\pm$ 1.78  | 2.14<br>$\pm$ 0.43 | 0                  | 8.41<br>$\pm$ 1.08  | 17.17<br>$\pm$ 2.55 | 12.99<br>$\pm$ 1.05 | 23.08<br>$\pm$ 4.69 |
| <b>400</b>  | leaf           | 27.33<br>$\pm$ 4.06 | 9.14<br>$\pm$ 2.14  | 1.95<br>$\pm$ 0.34 | 0.89<br>$\pm$ 0.13 | 7.08<br>$\pm$ 0.99  | 18.41<br>$\pm$ 2.81 | 13.67<br>$\pm$ 1.45 | 21.55<br>$\pm$ 3.72 |
| <b>600</b>  | leaf           | 26.25<br>$\pm$ 3.58 | 11.27<br>$\pm$ 1.25 | 1.83<br>$\pm$ 0.29 | 2.62<br>$\pm$ 0.23 | 9.38<br>$\pm$ 1.21  | 19.85<br>$\pm$ 2.43 | 11.94<br>$\pm$ 1.09 | 16.86<br>$\pm$ 2.88 |
