# Supplementary material
Source: PubMed Central journal article supplement (PMC3734578)
Supplement: supp_M112.022475_mcp.M112.022475-4.pdf [file supp_M112.022475_mcp.M112.022475-4.pdf]

## **Supplemental spectra and MALDI TOF MS identification information for Table 1**

**Annotated spectra for Table 1: 209 differentially expressed proteins identified by PMF and the combination results of PMF.**

Spot numbers of the 209 proteins correspond to the proteins that listed in Table 1.

**CID:** collision induced desorption

**MALDI TOF:**

matrix assisted laser desorption/ionization time of flight

**MS:** mass spectrometry

**PMF:** peptide mass fingerprinting

Spot No.: 1

Mascot score: 114    Sequence coverage %: 22

NCBI accession No.: gi| 15233779

Matched peptides No.: 15

Total peptides No.: 31

Calculated Mr: 76575

Calculated pI: 5.07

### Annotated PMF spectra:

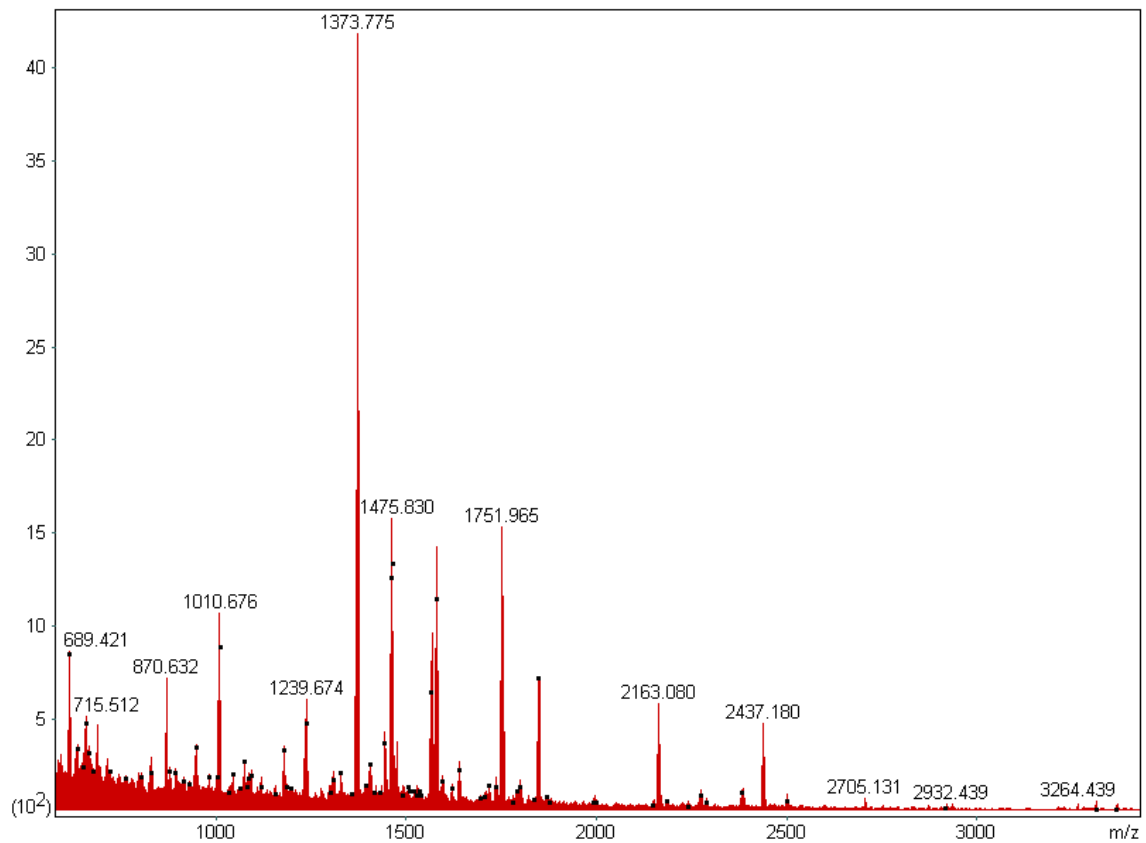

### Probability Based Mowse Score:

Protein score is  $-10 \cdot \log(P)$ , where P is the probability that the observed match is a random event. Protein scores greater than 72 are significant ( $p < 0.05$ ).

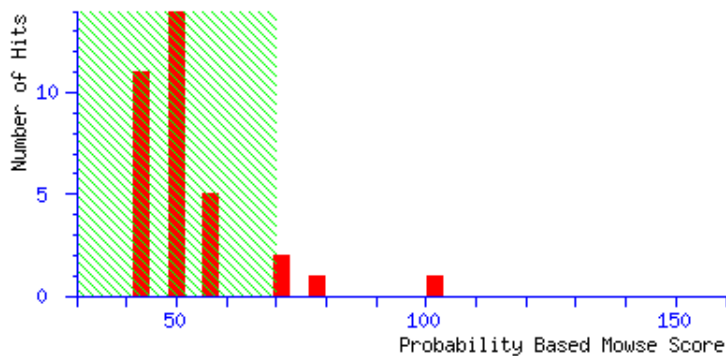

## Matched peptide sequences: shown in **Bold Red**

```

1 MASSAAQIHV LGGIGFASSS SSKRNLNGKG GTFMPRSAFF GTRTGPFFSTP
51 TSAFLRMGTR NGGGASRYAV GPVRVVMNEKV VGIDLGTNS AVAAAMEGGKP
101 TIVTNAEGQR TTPSVVAYTK SGDRLVGQIA KRQAVVNPEN TFFSVKRFIG
151 RKMNEVDEES KQVSYRVVRD ENNVKLECP AINKQFAAEE ISAQVLRKLV
201 DDASRFLNDK VTKAVITVPA YFNDSQRTAT KDAGRIAGLE VLRIINEPTA
251 ASLAYGFDRK ANETILVFDL GGGTFDVSVL EVGDGVFEVL STSGDTHLGG
301 DDFDKRVVDW LAAEFKKDEG IDLLKDKQAL QRLTEAAEKA KIELSSLTQT
351 NMSLPFITAT ADGPKHIETT LTRAKFEELC SDLLDRVTP VENSLRDAKL
401 SFKDIDEVIL VGGSTRIPAV QELVRKVTKG EPNVTVNPDE VVALGAAVQA
451 GVLAGDVSDI VLLDVTPLSI GLETLGGVMT KIIPRNTTLP TSKSEVFSTA
501 ADGQTSVEIN VLQGEREFVR DNKSLGSFRL DGIPPAPRGV PQIEVKFDID
551 ANGILSVSAV DKGTGKKQDI TITGASTLPK DEVQMQEA ERFAKDDKEK
601 RDAIDTKNQA DSVVYQTEKQ LKELGEKIPG EVKEKVEAKL QELKDKIGSG
651 STQEIKDAMA ALNQEVMQIG QSLYNQPGAG GPGAGPSPGG EGASSGDSSS
701 SKGGDGDDVI DADFTDSQ

```

## Matched peptides information:

| Start - End | Observed  | Mr(expt)  | Mr(calc)  | ppm | Miss | Sequence                             |               |
|-------------|-----------|-----------|-----------|-----|------|--------------------------------------|---------------|
| 25 - 36     | 1307.7306 | 1306.7233 | 1306.6452 | 60  | 1    | R. <b>NLNGKGGTFMPR</b> .S            | Oxidation (M) |
| 133 - 147   | 1735.9638 | 1734.9565 | 1734.9053 | 30  | 1    | R. <b>QAVVNPENTFFSVKR</b> .F         |               |
| 162 - 166   | 652.4457  | 651.4384  | 651.3340  | 160 | 0    | K. <b>QVS</b> YR.V                   |               |
| 167 - 176   | 1186.6598 | 1185.6525 | 1185.6102 | 36  | 1    | R.VVRDEN <b>NNVK</b> .L              |               |
| 185 - 197   | 1461.8320 | 1460.8247 | 1460.7623 | 43  | 0    | K. <b>QFAAEEISAQVLR</b> .K           |               |
| 214 - 227   | 1580.8757 | 1579.8684 | 1579.7995 | 44  | 0    | K.AVITV <b>PAYFNDSQR</b> .T          |               |
| 236 - 243   | 870.6318  | 869.6246  | 869.5334  | 105 | 0    | R. <b>IAGLEVLR</b> .I                |               |
| 328 - 332   | 615.4386  | 614.4313  | 614.3500  | 132 | 0    | K. <b>QALQR</b> .L                   |               |
| 374 - 386   | 1595.8403 | 1594.8330 | 1594.7661 | 42  | 1    | R. <b>AKFEELCSDLLDR</b> .V           |               |
| 389 - 396   | 915.5702  | 914.5630  | 914.4821  | 88  | 0    | R.TPV <b>ENSLR</b> .D                |               |
| 400 - 416   | 1849.0589 | 1848.0516 | 1847.9993 | 28  | 1    | K.L <b>SFKDIDEVILVGGSTR</b> .I       |               |
| 404 - 416   | 1373.7755 | 1372.7682 | 1372.7198 | 35  | 0    | K.D <b>IDEVILVGGSTR</b> .I           |               |
| 494 - 516   | 2437.1804 | 2436.1731 | 2436.1769 | -2  | 0    | K. <b>SEVFSTAADGQTSVEINVLQGER</b> .E |               |
| 524 - 529   | 666.4692  | 665.4619  | 665.3497  | 169 | 0    | K. <b>SLGSFR</b> .L                  |               |
| 581 - 592   | 1464.9001 | 1463.8928 | 1463.6198 | 187 | 0    | K. <b>DEV</b> Q <b>MQEAER</b> .F     | Oxidation (M) |

Spot No.: 2

Mascot score: 86 Sequence coverage %: 16

NCBI accession No.: gi| 20559

Matched peptides No.: 10

Total peptides No.: 19

Calculated Mr: 71137

Calculated pI: 5.07

### Annotated PMF spectra:

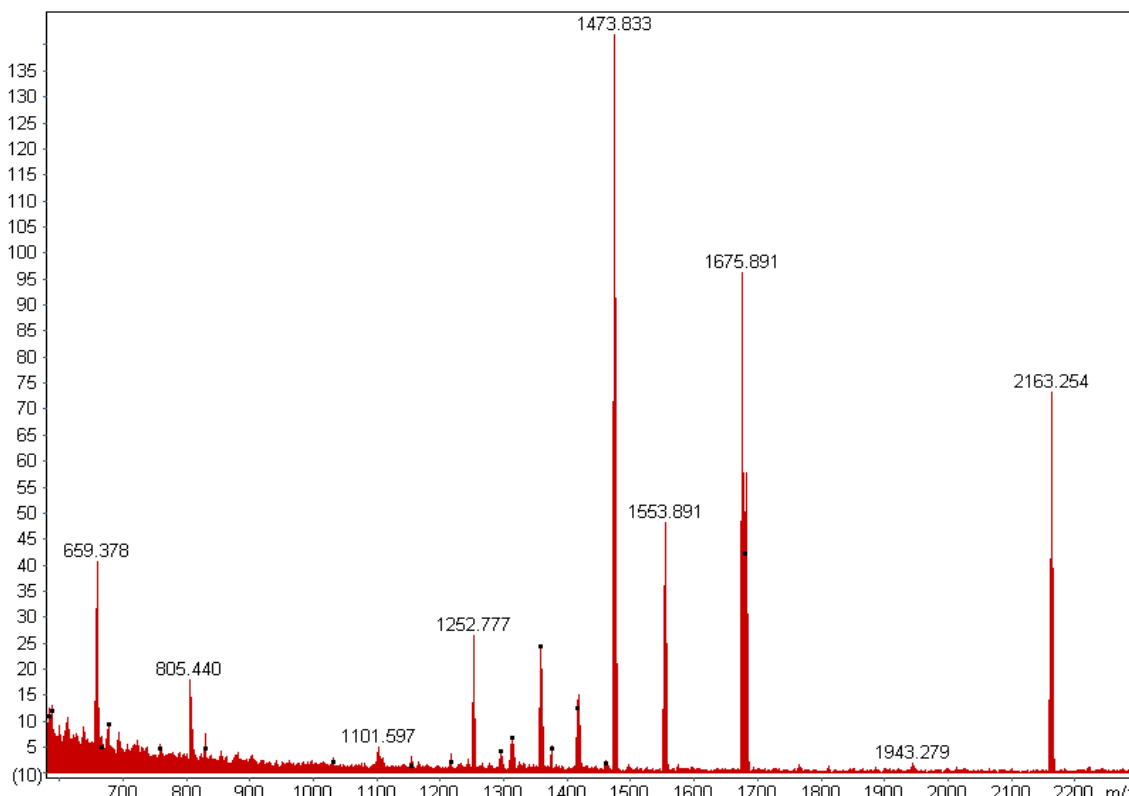

### Probability Based Mowse Score:

Protein score is  $-10 \cdot \log(P)$ , where P is the probability that the observed match is a random event. Protein scores greater than 72 are significant ( $p < 0.05$ ).

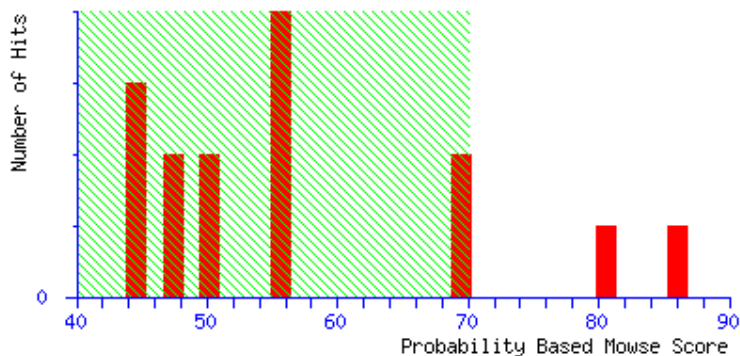

## Matched peptide sequences: shown in **Bold Red**

```

1  EGPAIGIDLG  TTYSCVGVWQ  HDRVEIIAND  QGNRTPSYV GFTDTERLIG
51  DAAKNQVAMN  PINTVFDAGR  LIGRRFSDPS  VQSDIKLWPF  KVIPGPGDKP
101 MIVVTYKGEE  KQFAAEEISS MVLTKMKEIA  EAYLGTTIKN  AVVTVPAYFN
151 DSQRQATKDA GVIAGLNVMR  IINEPTAAAI  AYGLDKKASS  AGEKNVLIFD
201 LGGGTFDVSL  LTIEEGIFEV  KATAGDTHLG  GEDFDNRMVN  HFVQEFKRKN
251 KKDISGNPRA  LRRLRTACER  AKRTLSSTAQ  TTIEIDSLYE  GIDFYSTITR
301 ARFEELNMDL  FRKCMPEVEK  CLRDAKMDKS  SVHDVVLVGG  STRIPKVQQL
351 LQDFFNGKEL  CKSINPDEAV  AYGAAVQAAI  LSGEGNEKVQ  DLLLLDVTPL
401 SLGLETAGGG  MTVLIPRNTT  IPTKKEQVFS  TYSDNQPGVL  IQVYEGERAR
451 TKDNMNLGKF  ELSGIPPAPR  GVPQITVCFD  IDANGILNVS  AEDKTTGQKN
501 KITITNDKGR  LSKEEIERMV  QEAEKYKSED  EELKKKVEAK  NALENYAYNM
551 RNTIKDDKIN  SQLSAADKKR  IEDAIDEAIK  WLDNNQLAEA  DEFEDKMKEL
601 ESICNPPIAK  MYQGGAGGAT  MDEDGPSVGG  SAGSQTGAGP  KIEEVD

```

## Matched peptides information:

| Start - End | Observed  | Mr(expt)  | Mr(calc)  | ppm | Miss | Sequence                               |
|-------------|-----------|-----------|-----------|-----|------|----------------------------------------|
| 35 - 47     | 1473.8331 | 1472.8258 | 1472.6784 | 100 | 0    | R. <b>TPSYVGF</b> <b>TDTER</b> .L      |
| 112 - 125   | 1553.8911 | 1552.8838 | 1552.7807 | 66  | 0    | K. <b>QFAAEEISSMVLTK</b> .M            |
| 140 - 154   | 1681.0152 | 1680.0079 | 1679.8267 | 108 | 0    | K. <b>NAVVTVPAYF</b> <b>DSQR</b> .Q    |
| 159 - 170   | 1215.7410 | 1214.7337 | 1214.6441 | 74  | 0    | K. <b>DAGVIAGLNVMR</b> .I              |
| 222 - 237   | 1675.8905 | 1674.8832 | 1674.7234 | 95  | 0    | K. <b>ATAGDTHLGGEDF</b> <b>DNRM</b> .M |
| 238 - 247   | 1294.7463 | 1293.7390 | 1293.6176 | 94  | 0    | R. <b>MVNHVQEFK</b> .R Oxidation (M)   |
| 253 - 259   | 758.3629  | 757.3557  | 757.3719  | -21 | 0    | K. <b>DISGNPRA</b>                     |
| 303 - 312   | 1313.7345 | 1312.7272 | 1312.6122 | 88  | 0    | R. <b>FEELNMDLFR</b> .K                |
| 541 - 551   | 1358.7360 | 1357.7287 | 1357.6084 | 89  | 0    | K. <b>NALENYAYNMR</b> .N               |
| 541 - 551   | 1374.7432 | 1373.7359 | 1373.6033 | 97  | 0    | K. <b>NALENYAYNMR</b> .N Oxidation (M) |

Spot No.: **3**

Mascot score: **99** Sequence coverage %: **22**

NCBI accession No.: **gi| 3962377**

Matched peptides No.: **20**

Total peptides No.: **53**

Calculated Mr: **71408**

Calculated pI: **5.14**

### Annotated PMF spectra:

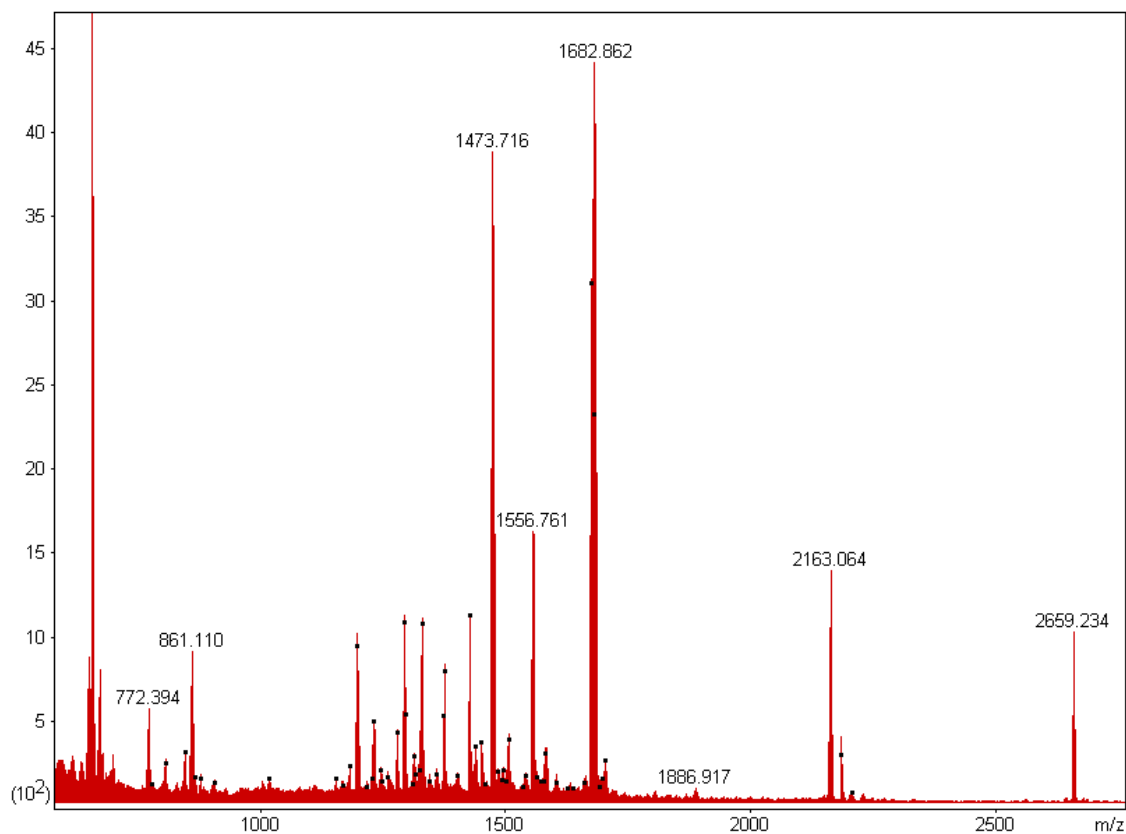

### Probability Based Mowse Score:

Protein score is  $-10 \cdot \log(P)$ , where P is the probability that the observed match is a random event. Protein scores greater than 72 are significant ( $p < 0.05$ ).

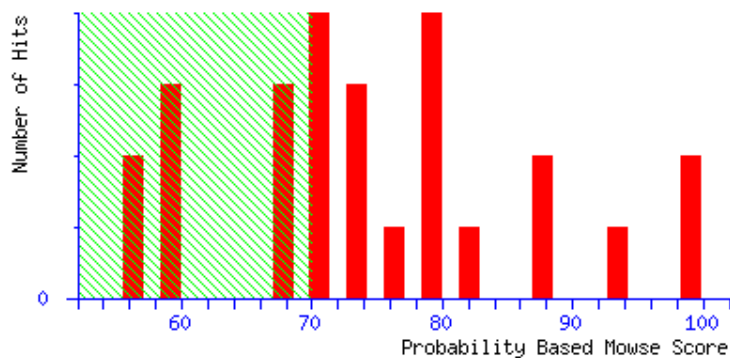

## Matched peptide sequences: shown in **Bold Red**

```

1  MAGKGEGPAI  GIDLGTTYSC  VGVWQHDRVE  IILANDQGNRT  TPSYVAFTDS
51 ERLIGDAAKN  QVAMNPTNTV  FDAKRLIGRR  YSDPSVQADK  SHWPFKVVSG
101 PGEKPMIVVN  HKGEEKQFSA  EEISSIVLIK  MREIAEAFLG  SPVKNAVVIV
151 PAYFNDSQRQ  GTKDAGVISG  LNVMRIINEP  TAAAIAYGLD  KKASSVGEKN
201 VLIFDLGGGT  FDVSLLTIEE  GIFEVKATAG  DTHLGGEDFD  NRMVNHFVQE
251 FKRKNKKDIT  GNPRALRRLR  TACERAKRTL  SSTAQTTIEI  DSLFEGIDFY
301 TTITRARFEE  LHMDLFRKCM  EPVEKCLRDA  KMDKSSVHDV  VVVGGSTRIP
351 KVQQLVQDFF  NGKELCKSIN  PDEAVAYGAA  VQAAILSGEG  NEKVQDLLLL
401 DVTPLSLGLE  TAGGVMTVLI  PRNTTIPTKK  EQIFSTYSDN  QPGVLIQVYE
451 GERARTKDNN  LLGKFELSGI  PPAPRGVPQI  TVCFDIDANG  ILNVSAEDKT
501 TGQKNKITIT  HDKGRLSKEE  IEKMVQEAEK  YKAEDEEHKK  KVDAKNALEN
551 YAYNMRNTIK  DEKIASKLDA  ADKKKIEDAI  DQAIEWLDGN  QLAEADEFED
601 KMKELESLCN  PIIARMYQGA  GPDMGGAGGM  DDDTPAGGSG  GAGPKIEEVD
651

```

## Matched peptides information:

| Start - End | Observed  | Mr(expt)  | Mr(calc)  | ppm  | Miss | Sequence                           |
|-------------|-----------|-----------|-----------|------|------|------------------------------------|
| 29 - 39     | 1228.6360 | 1227.6287 | 1227.6207 | 7    | 0    | R.VEIIANDQGNR.T                    |
| 40 - 52     | 1473.7156 | 1472.7083 | 1472.6783 | 20   | 0    | R.TPSYVAFTDSEK.L                   |
| 133 - 144   | 1260.5921 | 1259.5848 | 1259.6761 | -72  | 0    | R.EIAEAFLGSPVK.N                   |
| 145 - 159   | 1692.8384 | 1691.8311 | 1691.8631 | -19  | 0    | K.NAVVIVPAYFNDSQR.Q                |
| 160 - 175   | 1661.7971 | 1660.7898 | 1660.8567 | -40  | 1    | R.QGTKDAGVISGLNVMR.I Oxidation (M) |
| 164 - 175   | 1231.6494 | 1230.6421 | 1230.6391 | 2    | 0    | K.DAGVISGLNVMR.I                   |
| 164 - 175   | 1247.6125 | 1246.6052 | 1246.6340 | -23  | 0    | K.DAGVISGLNVMR.I Oxidation (M)     |
| 192 - 199   | 805.4144  | 804.4071  | 804.4341  | -34  | 1    | K.KASSVGEK.N                       |
| 193 - 199   | 677.2703  | 676.2630  | 676.3392  | -113 | 0    | K.ASSVGEK.N                        |
| 227 - 242   | 1675.7566 | 1674.7493 | 1674.7234 | 15   | 0    | K.ATAGDTHLGGEDFNK.M                |
| 243 - 252   | 1294.6377 | 1293.6304 | 1293.6176 | 10   | 0    | R.MVNHFVQEFK.R Oxidation (M)       |
| 258 - 264   | 772.3941  | 771.3868  | 771.3875  | -1   | 0    | K.DITGNPR.A                        |
| 271 - 275   | 636.2717  | 635.2644  | 635.2697  | -8   | 0    | R.TACER.A                          |
| 306 - 317   | 1540.7625 | 1539.7552 | 1539.7504 | 3    | 1    | R.ARFEELNMDLFR.K                   |
| 306 - 317   | 1556.7606 | 1555.7533 | 1555.7453 | 5    | 1    | R.ARFEELNMDLFR.K Oxidation (M)     |
| 308 - 317   | 1313.6354 | 1312.6281 | 1312.6122 | 12   | 0    | R.FEELNMDLFR.K                     |
| 308 - 317   | 1329.6340 | 1328.6267 | 1328.6071 | 15   | 0    | R.FEELNMDLFR.K Oxidation (M)       |
| 507 - 515   | 1017.5738 | 1016.5665 | 1016.5614 | 5    | 1    | K.IITINDKGR.L                      |
| 546 - 556   | 1358.6374 | 1357.6301 | 1357.6084 | 16   | 0    | K.NALENYAYNMR.N                    |
| 546 - 556   | 1374.6163 | 1373.6090 | 1373.6033 | 4    | 0    | K.NALENYAYNMR.N Oxidation (M)      |

Spot No.: 4

Mascot score: 100    Sequence coverage %: 22

NCBI accession No.: gi| 15230534

Matched peptides No.: 17

Total peptides No.: 37

Calculated Mr: 71456

Calculated pI: 5.14

### Annotated PMF spectra:

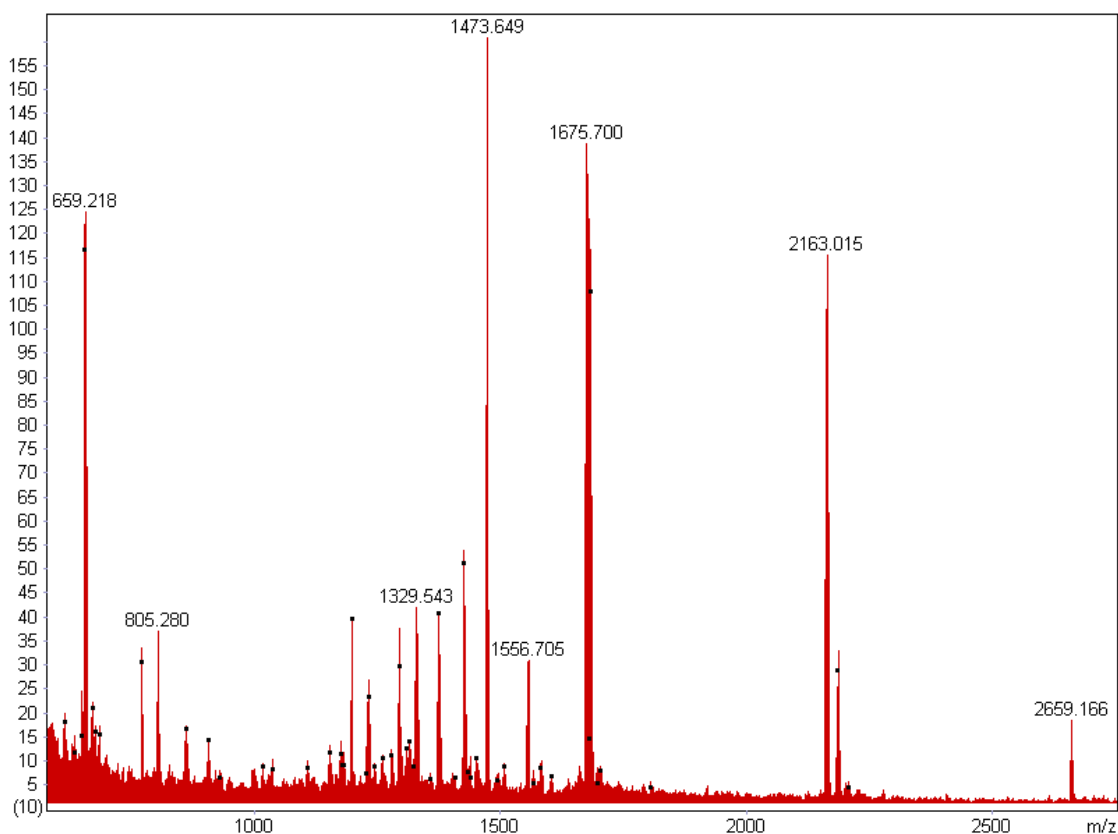

### Probability Based Mowse Score:

Protein score is  $-10 \cdot \log(P)$ , where P is the probability that the observed match is a random event. Protein scores greater than 72 are significant ( $p < 0.05$ ).

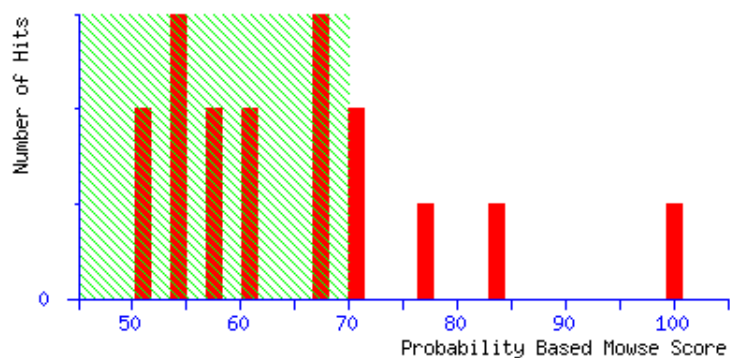



## Matched peptide sequences: shown in **Bold Red**

```

1  MAGKGEPAI  GIDLGTTYSC  VGVWQHDRVE I IANDQGNRT  TPSYVAFTDS
51 ERLIGDAAKN  QVAMNPTNTV  FDAKRLIGRR  YSDPSVQADK  SHWPFKVVSG
101 PGEKPMIVVN  HKGEEKQFSA  EEISSMVLIK  MREIAEAFLG  SPVKNAVVTV
151 PAYFNDSQRQ  ATKDAGVISG  LNVMRIINEP  TAAAIAYGLD  KKASSVGEKN
201 VLIFDLGGGT  FDVSLLTIEE  GIFEVKATAG  DTHLGGEDFD  HRMVNHFVQE
251 FKRKNKKDIT  GNPRALRRLR  TACERAKRTL  SSTAQTTEI  DSLFEGIDFY
301 TTITARFEE  LNMDLFRKCM  EPVEKCLRDA  KMDKSSVHDV  VLVGGSTRIP
351 KVQQLLQDFF  NGKELCKSIN  PDEAVAYGAA  VQAAILSGEG  NEKVQDLLLL
401 DVTPLSLGLE  TAGGVMTVLI  PRNTTIPTKK  EQIFSTYSDN  QPGVLIQVYE
451 GERARTKDNM  LLGKFELSGI  PPAPRGVPQI  TVCFDIDANG  ILNVSAEDKT
501 TGQKNKITIT  NDKGRLSKEE  IEKMQEAEK  YKAEDEEHKK  KVDAKNALEN
551 YAYNMRNTIK  DEKIASK LDA  ADKKKIEDAI  DQAI EWLDGN  QLAEADEFED
601 KMKELES LCN  PIIARMYQGA  GPDMGGAGGM  DDDTPAGGSG  GAGPKIEEVD
651

```

## Matched peptides information:

| Start - End | Observed  | Mr(expt)  | Mr(calc)  | ppm  | Miss | Sequence                        |
|-------------|-----------|-----------|-----------|------|------|---------------------------------|
| 29 - 39     | 1228.5482 | 1227.5409 | 1227.6207 | -65  | 0    | R.VEIIANDQGNR.T                 |
| 40 - 52     | 1473.6494 | 1472.6421 | 1472.6783 | -25  | 0    | R.TTPSYVAFTDSER.L               |
| 117 - 130   | 1581.7492 | 1580.7419 | 1580.8120 | -44  | 0    | K.QFSAEEISSMVLIK.M              |
| 133 - 144   | 1260.5210 | 1259.5137 | 1259.6761 | -129 | 0    | R.EIAEAFLGSPVK.N                |
| 164 - 175   | 1231.5561 | 1230.5488 | 1230.6391 | -73  | 0    | K.DAGVISGLNVMR.I                |
| 192 - 199   | 805.2802  | 804.2729  | 804.4341  | -200 | 1    | K.KASSVGEK.N                    |
| 193 - 199   | 677.1712  | 676.1639  | 676.3392  | -259 | 0    | K.ASSVGEK.N                     |
| 227 - 242   | 1675.7004 | 1674.6931 | 1674.7234 | -18  | 0    | K.ATAGDTHLGGEDFDNR.M            |
| 243 - 252   | 1294.5305 | 1293.5232 | 1293.6176 | -73  | 0    | R.MVNHFVQEFK.R Oxidation (M)    |
| 258 - 264   | 772.2478  | 771.2406  | 771.3875  | -191 | 0    | K.DITGNPR.A                     |
| 271 - 275   | 636.1199  | 635.1127  | 635.2697  | -247 | 0    | R.TACER.A                       |
| 306 - 317   | 1556.7047 | 1555.6974 | 1555.7453 | -31  | 1    | R.ARFEE LNMDLFR.K Oxidation (M) |
| 308 - 317   | 1313.5713 | 1312.5640 | 1312.6122 | -37  | 0    | R.FEELNMDLFR.K                  |
| 308 - 317   | 1329.5431 | 1328.5358 | 1328.6071 | -54  | 0    | R.FEELNMDLFR.K Oxidation (M)    |
| 318 - 325   | 1036.4181 | 1035.4108 | 1035.4729 | -60  | 1    | R.KMEPVKEK.C Oxidation (M)      |
| 507 - 515   | 1017.4587 | 1016.4514 | 1016.5614 | -108 | 1    | K.ITITNDKGR.L                   |
| 546 - 556   | 1358.5748 | 1357.5675 | 1357.6084 | -30  | 0    | K.NALENYAYNMR.N                 |

Spot No.: **5**

Mascot score: **201**    Sequence coverage %: **43**

NCBI accession No.: **gi| 15241849**

Matched peptides No.: **27**

Total peptides No.: **37**

Calculated Mr: **71712**

Calculated pI: **5.03**

### Annotated PMF spectra:

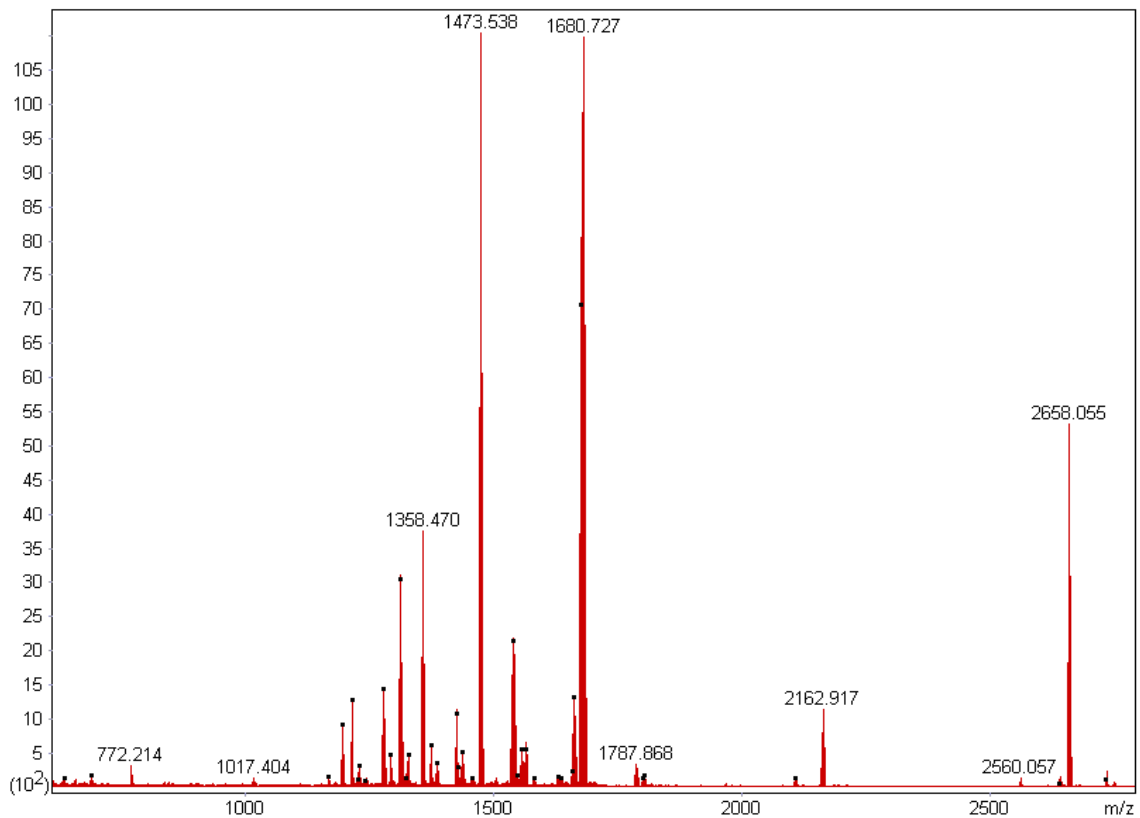

### Probability Based Mowse Score:

Protein score is  $-10 \cdot \log(P)$ , where P is the probability that the observed match is a random event. Protein scores greater than 72 are significant ( $p < 0.05$ ).

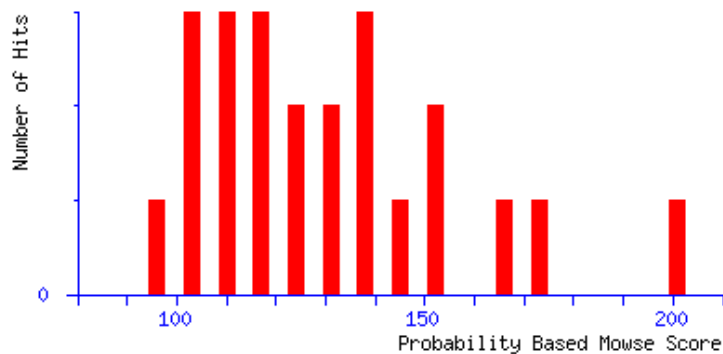

## Matched peptide sequences: shown in **Red**

```

1  MSGKGEGPAI  GIDLGTTYSC  VGVWQHDRVE  IIANDQGNRT  TPSYVAFTDS
51  ERLIGDAAKN  QVAMNPVNTV  FDAKRLIGRR  FSDSSVQSDM  KLWPFKIQAG
101 PADKPMIYVE  YKGEEKEFAA  EEISSMVLIK  MREIAEAYLG  VTIKNAVVTV
151 PAYFNDSQRQ  ATKDAGVIAG  LNVMRIINEP  TAAAIAYGLD  KKATSVGEKN
201 VLIFDLGGGT  FDVSLLTIEE  GIFEVKATAG  DTHLGGEDFD  NRMVNHVQE
251 FKRKSKDIT  GNPRALRRLR  TSCERAKRTL  SSTAQTTEIE  DSLYEGIDFY
301 STITRARFEE  LNMDLFRKCM  EPVEKCLRDA  KMDKSTVHDV  VLVGGSTRIP
351 KVQQLLQDF  NGKELCKSIN  PDEAVAYGAA  VQGAILSSEG  NEKVQDLLLL
401 DVTPLSLGLE  TAGGVMTTLI  PRNTTIPTTK  EQVFSTYSDN  QPGVLIQVYE
451 GERARTKDMN  LLGKFELSGI  PPAPRGVPQI  TVCFDIDANG  ILNVSAEDKT
501 TGQKNKITIT  NDKGRLSKDE  IEKMVQEAEK  YKSEDEEHKK  KVEAKNALEN
551 YAYNMRNTIQ  DEKIGEKLPA  ADKKKIEDSI  EQAIQWLEGN  QLAEADEFED
601 KMKELESICN  PIIAKMYQGA  GGEAGGPGAS  GMDDDAPPAS  GGAGPKIEEV
651 D

```

## Matched peptides information:

| Start - End | Observed  | Mr(expt)  | Mr(calc)  | ppm  | Miss | Sequence                           |
|-------------|-----------|-----------|-----------|------|------|------------------------------------|
| 29 - 39     | 1228.4528 | 1227.4455 | 1227.6207 | -143 | 0    | R.VEIIANDQGNR.T                    |
| 40 - 52     | 1473.5385 | 1472.5312 | 1472.6783 | -100 | 0    | R.TPSYVAFTDSER.L                   |
| 60 - 75     | 1803.7642 | 1802.7569 | 1802.9097 | -85  | 1    | K.NQVAMNPVNTVFDKRL.L               |
| 80 - 91     | 1386.5521 | 1385.5448 | 1385.6245 | -58  | 1    | R.RFSDSSVQSDMK.L                   |
| 92 - 96     | 690.2053  | 689.1980  | 689.3901  | -279 | 0    | K.LWPFK.I                          |
| 145 - 159   | 1680.7268 | 1679.7195 | 1679.8267 | -64  | 0    | K.NAVVTVPAYFNDSQR.Q                |
| 160 - 175   | 1659.7071 | 1658.6998 | 1658.8774 | -107 | 1    | R.QATKDAGVIAGLNVMR.I Oxidation (M) |
| 164 - 175   | 1215.5029 | 1214.4956 | 1214.6441 | -122 | 0    | K.DAGVIAGLNVMR.I                   |
| 164 - 175   | 1231.4628 | 1230.4555 | 1230.6391 | -149 | 0    | K.DAGVIAGLNVMR.I Oxidation (M)     |
| 176 - 192   | 1787.8676 | 1786.8603 | 1786.9828 | -69  | 1    | R.IINEPTAAAIAYGLDKK.A              |
| 227 - 242   | 1675.5911 | 1674.5838 | 1674.7234 | -83  | 0    | K.ATAGDTHLGGEDFNR.M                |
| 243 - 252   | 1278.4590 | 1277.4517 | 1277.6227 | -134 | 0    | R.MVNHVQVEFK.R                     |
| 243 - 252   | 1294.4670 | 1293.4597 | 1293.6176 | -122 | 0    | R.MVNHVQVEFK.R Oxidation (M)       |
| 258 - 264   | 772.2138  | 771.2065  | 771.3875  | -235 | 0    | K.DITGNPR.A                        |
| 306 - 317   | 1540.6256 | 1539.6183 | 1539.7504 | -86  | 1    | R.ARFEELNMDLFR.K                   |
| 306 - 317   | 1556.6246 | 1555.6173 | 1555.7453 | -82  | 1    | R.ARFEELNMDLFR.K Oxidation (M)     |
| 308 - 317   | 1313.4659 | 1312.4586 | 1312.6122 | -117 | 0    | R.FEELNMDLFR.K                     |
| 308 - 317   | 1329.4649 | 1328.4576 | 1328.6071 | -112 | 0    | R.FEELNMDLFR.K Oxidation (M)       |
| 332 - 348   | 1800.7879 | 1799.7806 | 1799.9200 | -77  | 1    | K.MDKSTVHDVVLVGGSTR.I              |
| 335 - 348   | 1426.5942 | 1425.5869 | 1425.7576 | -120 | 0    | K.STVHDVVLVGGSTR.I                 |
| 368 - 393   | 2560.0569 | 2559.0496 | 2559.2452 | -76  | 0    | K.SINPDEAVAYGAAVQGAILSSEGNEK.V     |
| 431 - 453   | 2658.0552 | 2657.0479 | 2657.2609 | -80  | 0    | K.EQVFSTYSDNQPGVLIQVYEGEGER.A      |
| 507 - 515   | 1017.4037 | 1016.3964 | 1016.5614 | -162 | 1    | K.ITITNDKGR.L                      |
| 546 - 556   | 1358.4704 | 1357.4631 | 1357.6084 | -107 | 0    | K.NALENYAYNMR.N                    |
| 546 - 556   | 1374.4657 | 1373.4584 | 1373.6033 | -106 | 0    | K.NALENYAYNMR.N Oxidation (M)      |
| 602 - 615   | 1661.6749 | 1660.6676 | 1660.8528 | -111 | 1    | K.MKELESICNPITAK.M Oxidation (M)   |
| 616 - 646   | 2732.9674 | 2731.9601 | 2732.1443 | -67  | 0    | K.MYQAGGGEAGGPASGMDDDAPPASGGAGPK.I |

Spot No.: **6**

Mascot score: **93**    Sequence coverage %: **19**

NCBI accession No.: **gi| 1695717**

Matched peptides No.: **11**

Total peptides No.: **21**

Calculated Mr: **73862**

Calculated pI: **5.08**

### Annotated PMF spectra:

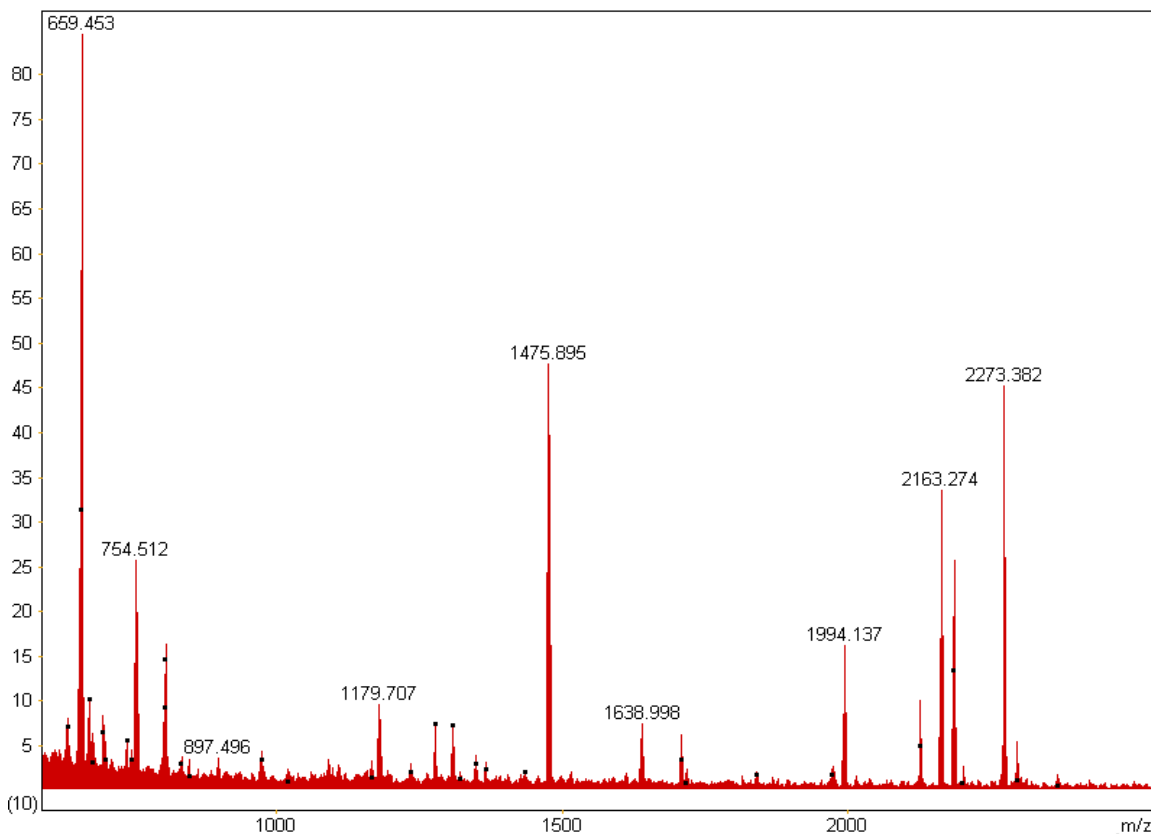

### Probability Based Mowse Score:

Protein score is  $-10 \cdot \log(P)$ , where P is the probability that the observed match is a random event. Protein scores greater than 72 are significant ( $p < 0.05$ ).

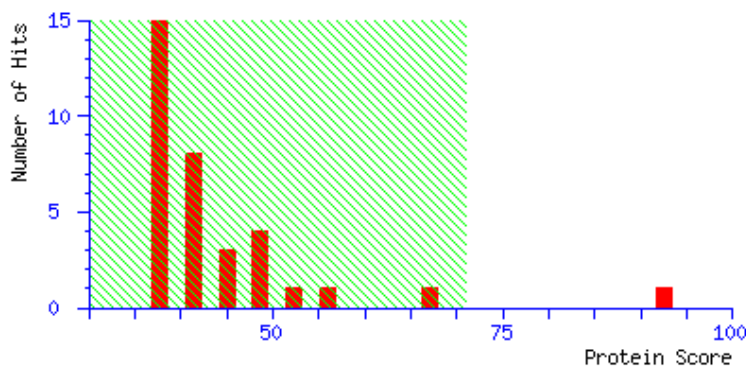

## Matched peptide sequences: shown in **Bold Red**

```

1  MARSFGANST VVLAIIFFGC LFALSSAIEE ATKLGSVIGI DLGTTYSCVG
51  VYKNGHVEII ANDQGNRITP SWVGFTDSER LIGEAAKNQA AVNPERTVFD
101 VKRLIGRKFE DKEVQKDRKL VPYQIVNKDG KPVIQVKIKD GETKVFSPPEE
151 ISAMILTKMK ETAEAYLGKK IKDAVVTVPA YFNDAQRQAT KDAGVIAGLN
201 VARIINEPTA AAIANVLDKK GGEKNILVFD LGGGTFDVSV LTIDNGVFEV
251 LSTNGDTHLG GEDFDHRVME YFIKLIKHH QKDISKDNKA LGKLRRECER
301 AKRALSSQHQ VRVEIESLFD GVDFSEPLTR ARFEELNNDL FRKTMGPVKK
351 AMDDAGLQKS QIDEIVLVGG STRIPKVQQL LKDFEFEGKEP NKGVNPDEAV
401 AYGAAVQGGI LSGEGGDETK DILLLDVAPL TLGIETVGGV MTKLIPRNTV
451 IPTKKSQVFT TYQDQQTIVS IQVFEGERSL TKDCRLLGKF DLNGIPPAPR
501 GTPQIEVTFE VDANGILNVK AEDKASGKSE KITITNEKGR LSQEEIDRMV
551 KEAEFFAEED KKVKEKIDAR NALETYVYNM KNQVNDKDKL ADKLEGDEKE
601 KIAAATKEAL EWLDENQNSE KEEYDEKLKE VEAVCNPIIT AVYQRSGGAP
651 GGAGGESSTE EEDESHDEL

```

## Matched peptides information:

| Start - End | Observed  | Mr (expt) | Mr (calc) | ppm | Miss | Sequence                          |
|-------------|-----------|-----------|-----------|-----|------|-----------------------------------|
| 68 - 80     | 1494.9289 | 1493.9216 | 1493.7151 | 138 | 0    | R.ITPSWVGFTDSER.L                 |
| 171 - 187   | 1907.3162 | 1906.3089 | 1905.9949 | 165 | 1    | K.IKDAVVTVPAYFNDAQR.Q             |
| 173 - 187   | 1666.0759 | 1665.0686 | 1664.8158 | 152 | 0    | K.DAVVTVPAYFNDAQR.Q               |
| 192 - 203   | 1155.7271 | 1154.7198 | 1154.6408 | 68  | 0    | K.DAGVIAGLNVAR.I                  |
| 313 - 330   | 2053.2618 | 2052.2545 | 2052.0052 | 122 | 0    | R.VEIESLFDGVD <b>FSEPLTR</b> .A   |
| 331 - 342   | 1523.9135 | 1522.9062 | 1522.7528 | 101 | 1    | R.A <b>RFEELNNDLFR</b> .K         |
| 333 - 342   | 1296.7326 | 1295.7253 | 1295.6146 | 85  | 0    | R.FEELNNDLFR.K                    |
| 360 - 373   | 1473.9855 | 1472.9782 | 1472.7835 | 132 | 0    | K.SQIDEIVLVGGSTR.I                |
| 521 - 528   | 805.4343  | 804.4271  | 804.3977  | 36  | 1    | K.AEDKASGK.S                      |
| 608 - 627   | 2498.3303 | 2497.3230 | 2497.0768 | 99  | 1    | K.EALEWLDENQ <b>NSEKEEYDEK</b> .L |
| 630 - 645   | 1862.2176 | 1861.2103 | 1860.9404 | 145 | 0    | K.EVEAVCN <b>PIITAVYQR</b> .S     |

Spot No.: 7

Mascot score: 99 Sequence coverage %: 20

NCBI accession No.: gi| 2493122

Matched peptides No.: 11

Total peptides No.: 27

Calculated Mr: 69030

Calculated pI: 5.19

### Annotated PMF spectra:

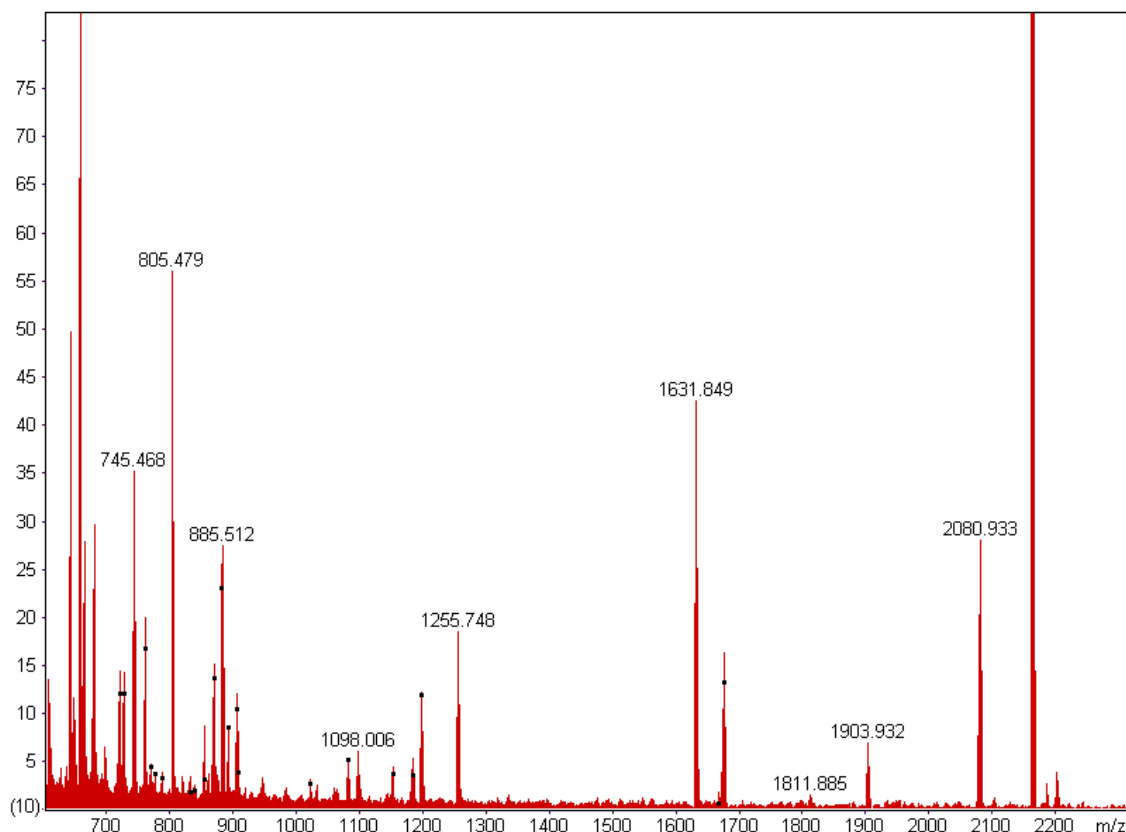

### Probability Based Mowse Score:

Protein score is  $-10 \cdot \log(P)$ , where P is the probability that the observed match is a random event. Protein scores greater than 72 are significant ( $p < 0.05$ ).

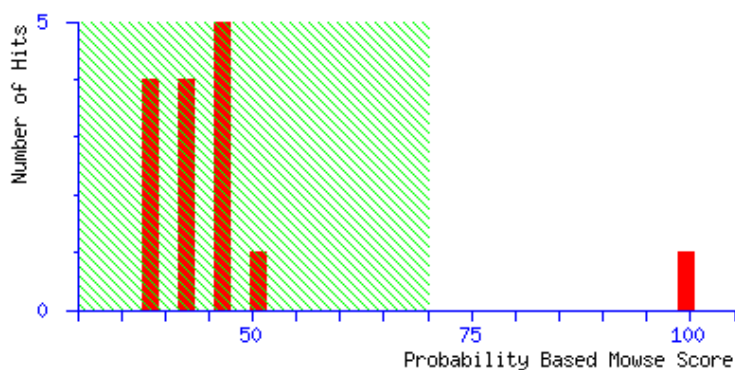

## Matched peptide sequences: shown in **Bold Red**

**1** MPAFYGGK**LT TFE**DEKESE **YGYVR**KVSGP VVVADGMAGA AMYELVVRVGH  
**51** DNLIGEII**RL EGD**SATI**QVY EETAGLTVND PVL**RTHKPLS VELGPGILGN  
**101** IFDGIQRPLK TIAK**RS**GD**VY IPR**GV**SVPAL DK**DCLW**EFQP KDF**VEGDTIT  
**151** GGDLYATVFE NSLMQH**HVAL PPD**AMGKITY LAPAGQYSLK DTVLELE**FQG**  
**201** VKKSFTMLQT WPVRTPRPVA SK**LAADTPLL TGQR**VLDALF PSVLGGTCAI  
**251** PGAFGCGKTV ISQALSK**YSN SDA**VVY**VGCG ER**GNEMAEVL MDFPQLTMTL  
**301** PDG**REESVMK RT**TLVANTSN MPVAA**REASI YTG**ITIAEYF RDMGYNV**SMM**  
**351** AD**STSRWAEA LRE**IS**RLAE MPAD**SGYPAY **LAAR**LASFYE RAGKVK**CLGG**  
**401** **PER**NGSVTIV GAVSPPGGDF SDP**VTSATLS IVQ**VF**WGLDK KLA**QRKH**FPS**  
**451** VN**WLISYSKY STA**LESFYEK FDSDFIDIRT KAREVLQRED DLNEIVQL**VG**  
**501** KDALAEGDKI TLETAKLLRE DYLAQNA**FTP YDK**FC**PFYKS V**W**MMR**NIHF  
**551** YNLANQ**AVER GAG**MDGQKIS YSLIKH**RLGD LF**YRLV**SQKF EDP**AEGEDVL  
**601** VGKFKKLHDD LTSGFRNLED ETR

## Matched peptides information:

| Start - End | Observed  | Mr(expt)  | Mr(calc)  | ppm | Miss Sequence                         |
|-------------|-----------|-----------|-----------|-----|---------------------------------------|
| 9 - 25      | 2080.9328 | 2079.9255 | 2079.9273 | -1  | 1 K.LTTFEDDEKESEYGYVR.K               |
| 60 - 84     | 2690.3088 | 2689.3015 | 2689.3447 | -16 | 0 R.LEGDSATIQVYEETAGLTVNDPVL.R.T      |
| 116 - 123   | 906.5246  | 905.5173  | 905.4607  | 63  | 0 R.SGDVYIPR.G                        |
| 124 - 132   | 885.5116  | 884.5043  | 884.4967  | 9   | 0 R.GVSVPALDK.D                       |
| 223 - 234   | 1255.7479 | 1254.7406 | 1254.6932 | 38  | 0 K.LAADTPLL <b>TGQR.V</b>            |
| 268 - 282   | 1675.7655 | 1674.7582 | 1674.7308 | 16  | 0 K.YSNSDAVVYVGCGER.G                 |
| 357 - 362   | 745.4680  | 744.4607  | 744.3918  | 93  | 0 R.WAEALR.E                          |
| 368 - 384   | 1811.8846 | 1810.8773 | 1810.8559 | 12  | 0 R.LAEMPADSGYPAYLAAR.L Oxidation (M) |
| 397 - 403   | 788.4156  | 787.4083  | 787.3647  | 55  | 0 K.CLGGPER.N                         |
| 540 - 545   | 841.3851  | 840.3778  | 840.3622  | 19  | 0 K.SV <b>WMMR.N</b> 2 Oxidation (M)  |
| 578 - 584   | 883.5153  | 882.5080  | 882.4599  | 54  | 0 R.LGD <b>LFYR.L</b>                 |

Spot No.: 8

Mascot score: 129 Sequence coverage %: 36

NCBI accession No.: gi| 312282199

Matched peptides No.: 24

Total peptides No.: 64

Calculated Mr: 74860

Calculated pI: 6.13

### Annotated PMF spectra:

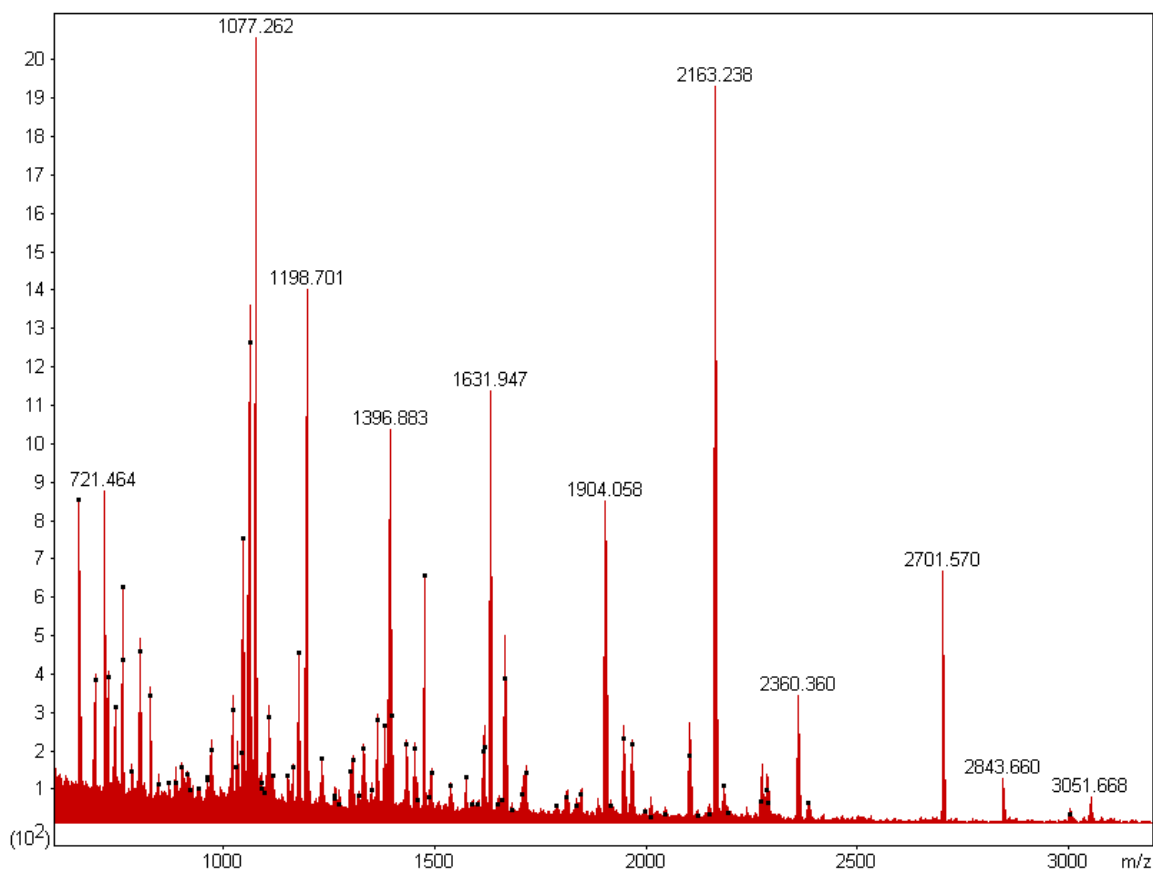

### Probability Based Mowse Score:

Protein score is  $-10 \cdot \log(P)$ , where P is the probability that the observed match is a random event. Protein scores greater than 72 are significant ( $p < 0.05$ ).

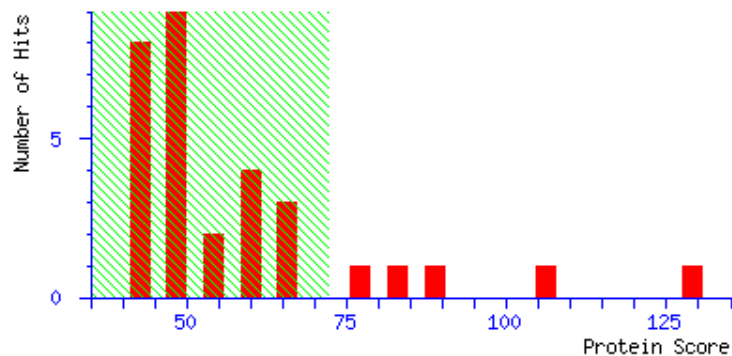



Matched peptide sequences: shown in **Bold Red**

```

1 MAASSACLVG NGLSVYTTKQ RLSKNFSRRQ IGLSTTFSSV SRTSKVNVVK
51 ASLDVKKHDG RRDFLKILLG NAGIGLIGSG KANADEQGVV SSRMSYSRFL
101 EYLDKDRVNK VDLYENGTIA IVEAVSPELG NRVQRVVRVQL PGLSQELLQK
151 LRAKNIDFAA HNDQEDQGSV LFNLIGNLAF PLLLIGGLFL LSRRSSGGMG
201 GPGGPGFPLQ FGQSKAKFQM EPNTGVTFDD VAGVDEAKQD FMEVVEFLKK
251 PERFTAVGAR IPKGVLLIGP PGTGKILLAK AIAGEAGVVF FSISGSEFVE
301 MFVGVGASRV RDLFKKAKEN APCIVFVDEI DAVGRQRGTG IGGGNDEREQ
351 TLNQLLEMD GFEGNTGIIV VAATNRADIL DSALLRPGRF DRQVSDVDPD
401 IKGRTDILKV HAGNKKFEND VSLEVIAMRT PGFSGADLAN LLNEAAILAG
451 RRGKTAIASK EIDDSIDRIV AGMEGTVMTD SKSKSLVAYH EVGHAVCGTL
501 TPGHDAVQKV TLIPRQARG LTFWIPSDDP TLISKQQLFA RIVGGLGGRA
551 AAEVIFGEPE VTTGAVGDLQ QITGLAKQMV TTFGMSDIGP WSLMVSSAQS
601 DVIMRMMARN SMSERLAEDI DSAIKKLSDS AYEIALSHIR NNREAMDKLV
651 EVLLEKETIG GDEFRAILSE YTEIPPENRV PTSTTATPTS TPTPASV

```

Matched peptides information:

| Start - End | Observed  | Mr (expt) | Mr (calc) | ppm | Miss | Sequence                                |
|-------------|-----------|-----------|-----------|-----|------|-----------------------------------------|
| 29 - 42     | 1538.8398 | 1537.8325 | 1537.8213 | 7   | 1    | R.RQIGLSTTFSSVSR.T                      |
| 94 - 98     | 659.4351  | 658.4278  | 658.2744  | 233 | 0    | R.MSYSR.F Oxidation (M)                 |
| 99 - 107    | 1198.7013 | 1197.6940 | 1197.6030 | 76  | 1    | R.FLEYLDRDR.V                           |
| 218 - 238   | 2286.2174 | 2285.2101 | 2285.0158 | 85  | 0    | K.FQMEPNTGVTFDDVAGVDEAK.Q Oxidation (M) |
| 239 - 249   | 1400.7520 | 1399.7447 | 1399.6694 | 54  | 0    | K.QDFMEVVEFLK.K Oxidation (M)           |
| 254 - 260   | 721.4636  | 720.4564  | 720.3919  | 90  | 0    | R.FTAVGAR.I                             |
| 264 - 275   | 1108.7020 | 1107.6947 | 1107.6652 | 27  | 0    | K.GVLLIGPPGTGK.T                        |
| 317 - 335   | 2103.1773 | 2102.1700 | 2102.0466 | 59  | 1    | K.AKENAPCIVFVDEIDAVGR.Q                 |
| 319 - 335   | 1904.0583 | 1903.0510 | 1902.9146 | 72  | 0    | K.ENAPCIVFVDEIDAVGR.Q                   |
| 338 - 348   | 1032.4885 | 1031.4812 | 1031.4632 | 17  | 0    | R.GTGIGGGNDER.E                         |
| 377 - 389   | 1396.8829 | 1395.8756 | 1395.7834 | 66  | 1    | R.ADILDSALLRPGR.F                       |
| 416 - 429   | 1650.9369 | 1649.9296 | 1649.8447 | 51  | 1    | K.KFENDVSLEVIAMR.T                      |
| 416 - 429   | 1666.9652 | 1665.9579 | 1665.8396 | 71  | 1    | K.KFENDVSLEVIAMR.T Oxidation (M)        |
| 461 - 468   | 962.5087  | 961.5014  | 961.4352  | 69  | 0    | K.EIDDSIDR.I                            |
| 510 - 515   | 698.5007  | 697.4934  | 697.4487  | 64  | 0    | K.VTLIPR.G                              |
| 520 - 535   | 1790.0120 | 1789.0047 | 1788.9298 | 42  | 0    | R.GLTFWIPSDDPPTLISK.Q                   |
| 536 - 541   | 762.4829  | 761.4757  | 761.4184  | 75  | 0    | K.QQLFAR.I                              |
| 542 - 549   | 728.5082  | 727.5009  | 727.4341  | 92  | 0    | R.IVGGLGGR.A                            |
| 550 - 577   | 2843.6603 | 2842.6530 | 2842.4600 | 68  | 0    | R.AAEVIFGEPEVTTGAVGDLQQITGLAK.Q         |
| 627 - 640   | 1574.9255 | 1573.9182 | 1573.8100 | 69  | 0    | K.LSDSAYEIALSHIR.N                      |
| 649 - 656   | 942.5623  | 941.5550  | 941.5797  | -26 | 0    | K.LVEVLLEK.E                            |
| 649 - 665   | 1947.1701 | 1946.1628 | 1946.0360 | 65  | 1    | K.LVEVLLEKETIGGDEFR.A                   |
| 657 - 665   | 1023.5537 | 1022.5464 | 1022.4669 | 78  | 0    | K.ETIGGDEFR.A                           |
| 666 - 679   | 1631.9468 | 1630.9395 | 1630.8202 | 73  | 0    | R.AILSEYTEIPPENR.V                      |

Spot No.: **9**

Mascot score: **90**    Sequence coverage %: **29**

NCBI accession No.: **gi| 20467991**

Matched peptides No.: **18**

Total peptides No.: **58**

Calculated Mr: **74547**

Calculated pI: **6.75**

### Annotated PMF spectra:

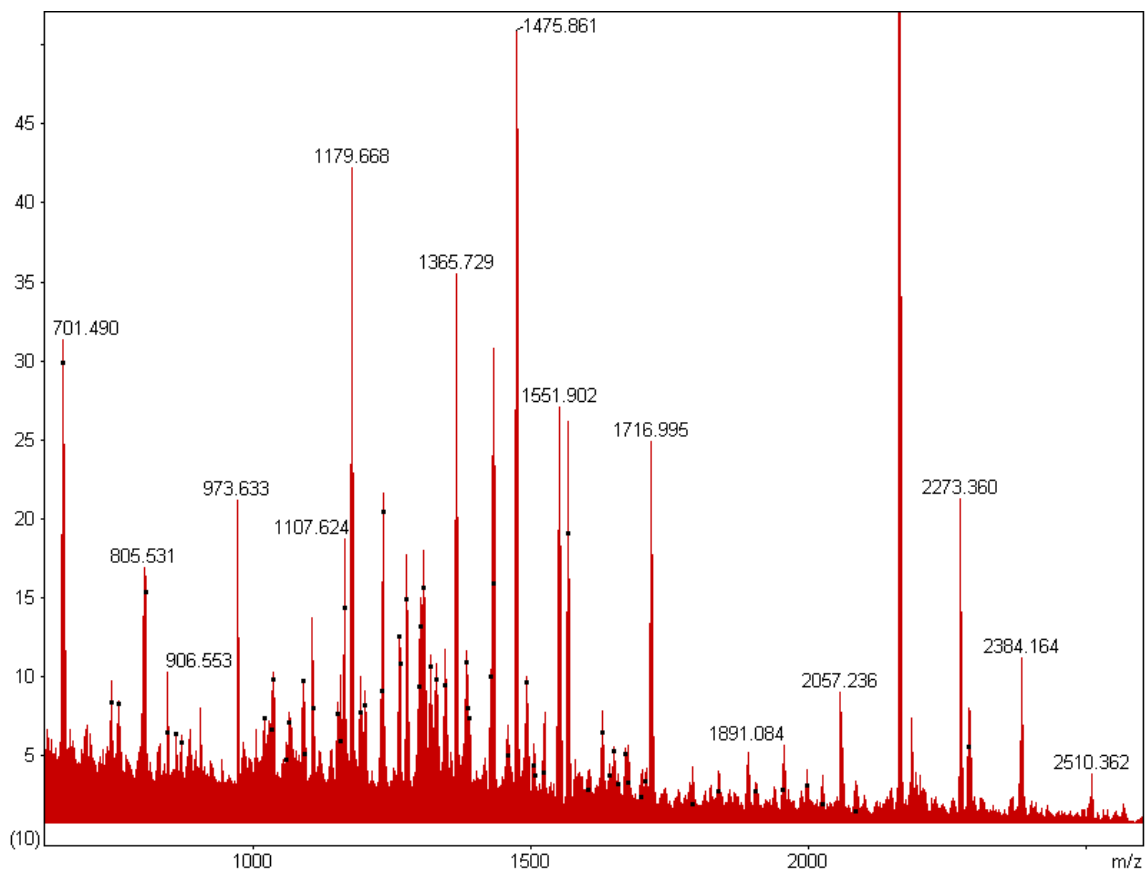

### Probability Based Mowse Score:

Protein score is  $-10 \cdot \log(P)$ , where P is the probability that the observed match is a random event. Protein scores greater than 72 are significant ( $p < 0.05$ ).

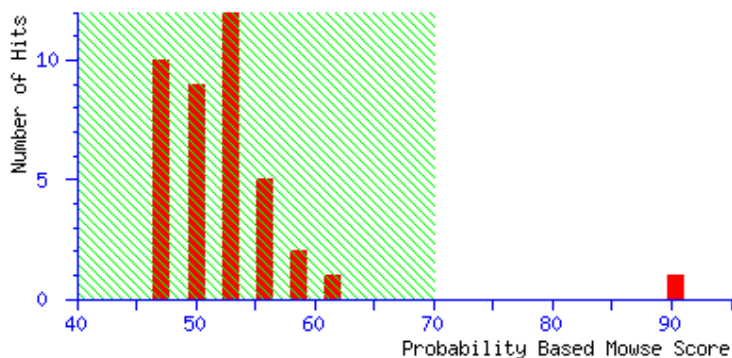

Matched peptide sequences: shown in **Bold Red**

```

1 MEYSSDDSD ISDSEIDEYG AKIQARLLSG DLKFRNGDSY SCPFCTGRKN
51 KDYNMQSLLQ HSSGVGAAPN RPAKDKASHR ALAKHLKNGV AKPSDPQQAQ
101 QIAVEPQQPQ QISVEPQPLP NRHEKFWVPW MGVLVNVPTV WKDGRQVGES
151 GNRLKGELSQ FCPLKVIPLW NFRGHTGNAI VEFAKNWNGF RNALAFEKYF
201 EAGGCGRRDW KQNMNQGSKL CGWVARAEDY NFPGLIGDHL RKNADLKTID
251 DLENEGTRKN NKLVANLANQ IEVKNKYLQE LELRYNETTV SLEKMMGQRE
301 QRLQAYNEEI RKMQQLARRH SEKIIDENQN LRSELESKMS ELNARSKELD
351 DLAAKSSHDK SNLEQEKQKN AIKSNHLKLA TAEQQRADED VVKLVLDQKR
401 EKVAALNKIL ELEQQLEAKQ TLELEIQQLK GKLEVMKHMP GHEDSVLKDK
451 INELSEELQD KMDEL DAMES LNQTLVIKES KSNTM QEAR KELENGLLNL
501 PGGRAHIGIK RMGELD LKAV SNVLGQKLSK EDA EVTAAIL CSKWEAEIKN
551 PEWHPPFRAVM VDGKEMERIN ADDAKLRELK DEHGEEIYSL VTKALREYNV
601 NSTRYPVGEL WNFREERKAS LKEAVQV VLR QWRANRRKR

```

Matched peptides information:

| Start - End | Observed  | Mr (expt) | Mr (calc) | ppm | Miss | Sequence                                        |
|-------------|-----------|-----------|-----------|-----|------|-------------------------------------------------|
| 27 - 33     | 745.5092  | 744.5019  | 744.4381  | 86  | 0    | R.LLSGDLK.F                                     |
| 186 - 198   | 1566.8631 | 1565.8558 | 1565.7739 | 52  | 1    | K.NWNGFRNALAFEK.Y                               |
| 227 - 241   | 1716.9954 | 1715.9881 | 1715.8267 | 94  | 0    | R.AEDYNFPGLIGDHLR.K                             |
| 248 - 259   | 1390.7614 | 1389.7541 | 1389.6736 | 58  | 1    | K.TIDLENEGTRK.N                                 |
| 303 - 312   | 1263.7173 | 1262.7100 | 1262.6618 | 38  | 1    | R.LQAYNEEIRK.M                                  |
| 333 - 345   | 1493.8084 | 1492.8011 | 1492.7191 | 55  | 1    | R.SELESKMSELNAR.S                               |
| 361 - 367   | 847.5362  | 846.5290  | 846.4083  | 143 | 0    | K.SNLEQEK.Q                                     |
| 368 - 373   | 701.4900  | 700.4828  | 700.4231  | 85  | 1    | K.QKNAIK.S                                      |
| 394 - 399   | 758.5183  | 757.5111  | 757.4446  | 88  | 1    | K.LVRDQK.R                                      |
| 438 - 448   | 1265.7165 | 1264.7092 | 1264.5870 | 97  | 0    | K.HMPGHEDSVLK.D Oxidation (M)                   |
| 438 - 450   | 1508.8192 | 1507.8119 | 1507.7089 | 68  | 1    | K.HMPGHEDSVLKDK.I Oxidation (M)                 |
| 451 - 478   | 3264.7942 | 3263.7869 | 3263.5788 | 64  | 1    | K.INELSEELQDKMDEL DAMESLNQTLVIK.E Oxidation (M) |
| 482 - 490   | 1065.5921 | 1064.5848 | 1064.4556 | 121 | 0    | K.SNTM QEAR.K                                   |
| 482 - 491   | 1193.6844 | 1192.6771 | 1192.5506 | 106 | 1    | K.SNTM QEAR.K.E                                 |
| 512 - 518   | 805.5308  | 804.5235  | 804.4051  | 147 | 0    | R.MGELD LK.A                                    |
| 531 - 549   | 2163.2609 | 2162.2536 | 2162.0565 | 91  | 1    | K.EDA EVTAAILCSKWEAEIK.N                        |
| 565 - 575   | 1307.7582 | 1306.7509 | 1306.5823 | 129 | 1    | K.EMERINADDAK.L Oxidation (M)                   |
| 623 - 633   | 1383.7538 | 1382.7465 | 1382.7783 | -23 | 1    | K.EAVQV VLRQWR.A                                |

Spot No.: **10**

Mascot score: **95**    Sequence coverage %: **22**

NCBI accession No.: **gi| 312283065**

Matched peptides No.: **16**

Total peptides No.: **35**

Calculated Mr: **73489**

Calculated pI: **5.72**

### Annotated PMF spectra:

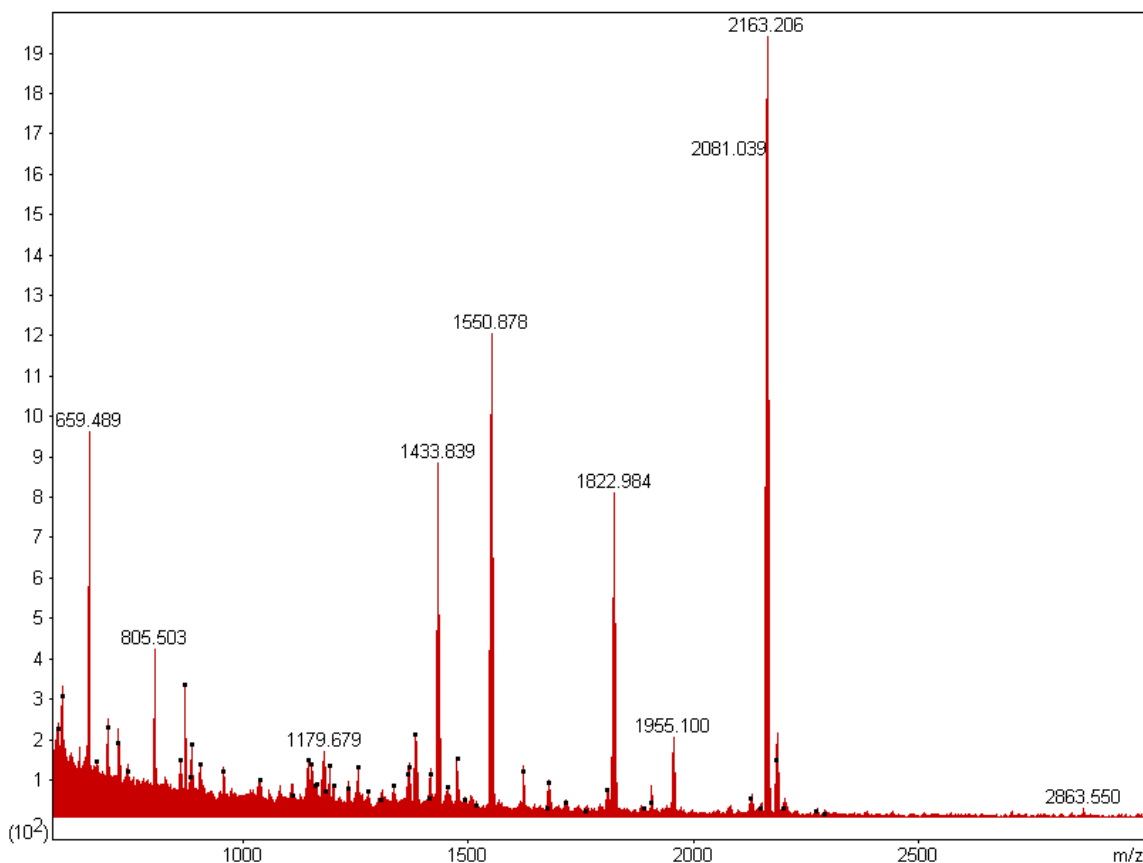

### Probability Based Mowse Score:

Protein score is  $-10 \cdot \log(P)$ , where P is the probability that the observed match is a random event. Protein scores greater than 72 are significant ( $p < 0.05$ ).

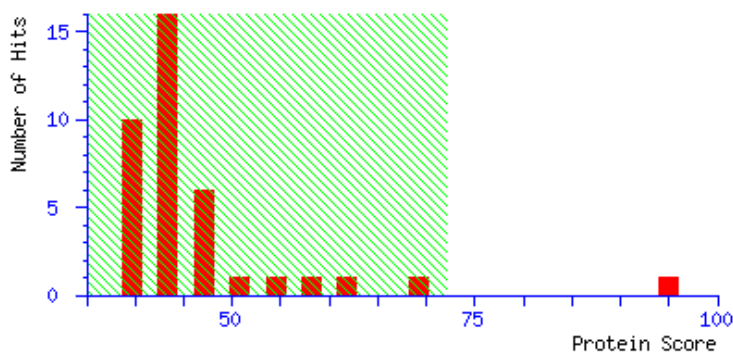

Matched peptide sequences: shown in **Bold Red**

```

1  MATAALLRSI RRREVASTPF SAYKCLSSSG KISFNNGSYLG QNWRSFSRAF
51  SSKPAGNDVI GIDLGTNSC VAVMEGKNPK VIENAEGART TPSVVAFNPK
101 GELLVGTPAK RQAVTNPTNT VFGTKRLIGR KFDDPQTQKE MKMVPYKIVR
151 APNGDAWVEA NGQQYSPSQV GAFVLTKMKE TAEAYLGKSV KKAVVTVPAY
201 FNDAQRQATK DAGRIAGLDV ERIINEPTAA ALSYGMTNKE GLIAVFDLGG
251 GTFDISVLEI SNGVFEVKAT NGDTFLGGED FDNALLDFLV NEFKTTEGID
301 LAKDRLALQR LREAAEKAKI ELSSTSQTEI NLPFITADAS GAKHFNITLT
351 RSRFETLVNH LIERTRDPCK NCLKDAGISA KEVDEVLLVG GMTRVPKVQS
401 VVSEIFGKTP SKGVNPDEAV AMGAALQGGI LRGDVKELL LDTVPLSLGI
451 ETLGGVFTRL ISRNTTIPTK KSQVFSTAAD NQTQVGIRVL QGEREMATDN
501 KLLGEFDLVG IPPSPRGIPQ IEVTFDIDAN GIVTVSAKDK TTGKEQQITI
551 RSSGGLSEDD IQKVMREAEL HAQKDKERKD LIDTKNTADT TIYSIEKSLG
601 EYREKIPSEV AKEIEDAVSD LRSATSGDDL NEIKAKIDAA NKAIVSKIGE
651 MSNGGSGGGS APGGGAQKGS DEAPEAEYEE VKK

```

Matched peptides information:

| Start - End | Observed  | Mr (expt) | Mr (calc) | ppm | Miss | Sequence                               |
|-------------|-----------|-----------|-----------|-----|------|----------------------------------------|
| 1 - 8       | 862.5249  | 861.5176  | 861.4742  | 50  | 0    | -.MATAALLR.S Oxidation (M)             |
| 81 - 89     | 958.5598  | 957.5525  | 957.4879  | 67  | 0    | K.VIENAEGAR.T                          |
| 178 - 188   | 1256.7208 | 1255.7135 | 1255.6118 | 81  | 1    | K.MKETAEAYLGK.S Oxidation (M)          |
| 193 - 206   | 1550.8776 | 1549.8703 | 1549.7889 | 53  | 0    | K.AVVTVPAYFNDAQR.Q                     |
| 215 - 222   | 872.5613  | 871.5540  | 871.4763  | 89  | 0    | R.IAGLDVER.I                           |
| 223 - 239   | 1809.9646 | 1808.9573 | 1808.8978 | 33  | 0    | R.IINEPTAAALSYGMTNK.E Oxidation (M)    |
| 306 - 310   | 600.4723  | 599.4650  | 599.3755  | 149 | 0    | R.LALQR.L                              |
| 354 - 364   | 1370.7903 | 1369.7830 | 1369.7354 | 35  | 0    | R.FETLVNH LIER.T                       |
| 382 - 394   | 1417.8149 | 1416.8076 | 1416.7283 | 56  | 0    | K.EVDEVLLVGGMTR.V                      |
| 382 - 394   | 1433.8390 | 1432.8317 | 1432.7232 | 76  | 0    | K.EVDEVLLVGGMTR.V Oxidation (M)        |
| 398 - 408   | 1192.7085 | 1191.7012 | 1191.6499 | 43  | 0    | K.VQSVVSEIFGK.T                        |
| 413 - 432   | 1955.1000 | 1954.0927 | 1953.9942 | 50  | 0    | K.GVNPDEAVAMGAALQGGILR.G Oxidation (M) |
| 489 - 494   | 701.4826  | 700.4753  | 700.3868  | 126 | 0    | R.VLQGER.E                             |
| 545 - 551   | 887.5645  | 886.5572  | 886.4872  | 79  | 0    | K.EQQITIR.S                            |
| 598 - 603   | 724.4592  | 723.4520  | 723.3551  | 134 | 0    | K.SLGEYR.E                             |
| 613 - 622   | 1146.6350 | 1145.6277 | 1145.5564 | 62  | 0    | K.EIEDAVSDLR.S                         |

Spot No.: **11**

Mascot score: **146**    Sequence coverage %: **43**

NCBI accession No.: **gi| 312282567**

Matched peptides No.: **15**

Total peptides No.: **29**

Calculated Mr: **42944**

Calculated pI: **7.59**

### Annotated PMF spectra:

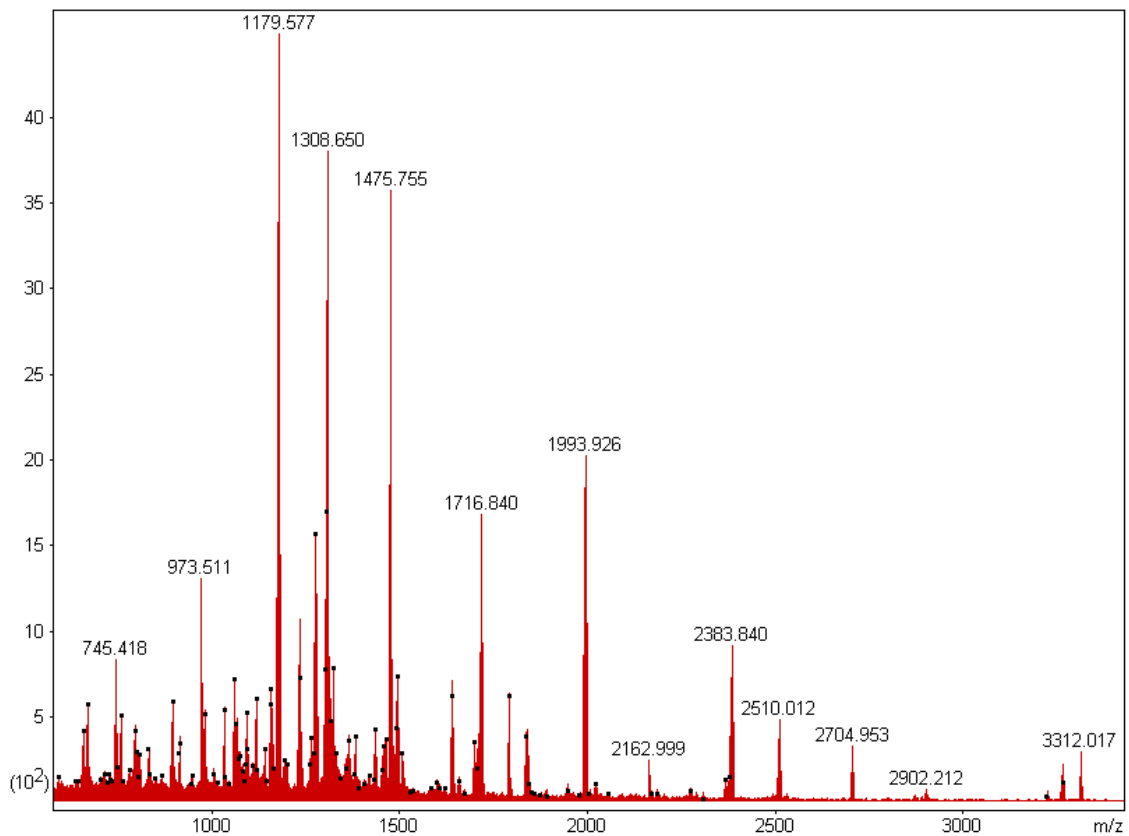

### Probability Based Mowse Score:

Protein score is  $-10 \cdot \log(P)$ , where  $P$  is the probability that the observed match is a random event. Protein scores greater than 72 are significant ( $p < 0.05$ ).

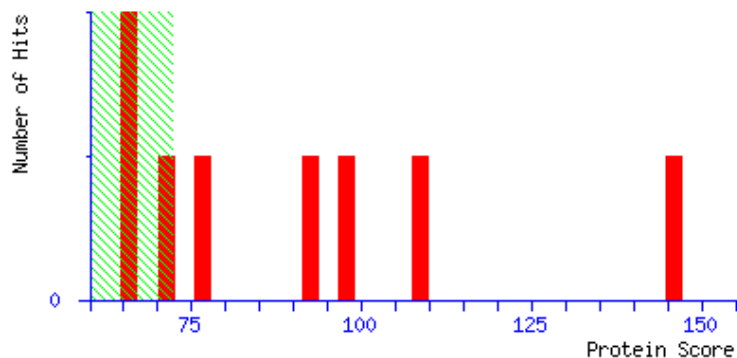

Matched peptide sequences: shown in **Bold Red**

```

1 MASATFSVPK PSLQGFTEFS GLRSSASLP FGKKLSSDEF VSVVTFQTS
51 MGSSGGYRKG VTEAKLKVAI SGFGRIGRNF LRCWHGRKDS PLDVIAINDT
101 GGVKQASHLL KYDSTLGIFD ADVKPSGDAA LSVDGKIIQV VSNRNPSNLP
151 WKELGIDIVI EGTGVFVDRE GAGKHIEAGA KKVIITAPGK GDIPTYVGV
201 NADAYNPDEP IISNASCTTN CLAPFVKVLD QKFGIIKGTM TTTPSYTGDQ
251 RLLDASHRDL RRARAAALNI VPTSTGAAKA VALVLPNLKG KLNGIALRVP
301 TPNVSVVDLV VQVSKKTFAE EVNAAFRDAA EKELKGILEV CDEPLVSVDF
351 RCSDVSSTID SSLTMVMGDD MVKVIAWYDN EWGYSQRVVD LADIVANNWK
401

```

Matched peptides information:

| Start - End | Observed  | Mr (expt) | Mr (calc) | ppm  | Miss | Sequence                               |
|-------------|-----------|-----------|-----------|------|------|----------------------------------------|
| 83 - 87     | 715.1768  | 714.1695  | 714.3020  | -186 | 0    | R.CWHGR.K                              |
| 89 - 104    | 1613.7024 | 1612.6951 | 1612.8308 | -84  | 0    | K.DSPLDVIAINDTGGVK.Q                   |
| 112 - 136   | 2541.2203 | 2540.2130 | 2540.2282 | -6   | 1    | K.YDSTLGI <b>FDADV</b> KPSGDAALSVDGK.I |
| 137 - 144   | 928.4151  | 927.4078  | 927.5502  | -153 | 0    | K.IIQVVSNR.N                           |
| 145 - 152   | 955.3390  | 954.3318  | 954.4923  | -168 | 0    | R.NPSNLPWK.E                           |
| 153 - 169   | 1831.8466 | 1830.8393 | 1830.9727 | -73  | 0    | K.ELGIDIVIEGTGVFVDR.E                  |
| 252 - 258   | 811.2828  | 810.2755  | 810.4348  | -197 | 0    | R.LLDASHR.D                            |
| 280 - 289   | 1037.4606 | 1036.4533 | 1036.6644 | -204 | 0    | K.AVALVLPNLK.G                         |
| 292 - 298   | 756.3273  | 755.3201  | 755.4653  | -192 | 0    | K.LNGIALR.V                            |
| 299 - 315   | 1779.8339 | 1778.8266 | 1779.0142 | -105 | 0    | R.VPTPNVSVVDLVVQVSK.K                  |
| 316 - 327   | 1382.5814 | 1381.5741 | 1381.6990 | -90  | 1    | K.KTFAEVNAEFR.D                        |
| 317 - 327   | 1254.4878 | 1253.4805 | 1253.6040 | -99  | 0    | K.TFAEEVNAEFR.D                        |
| 336 - 351   | 1847.8656 | 1846.8583 | 1846.9135 | -30  | 0    | K.GILEVCDEPLVSVDFR.C                   |
| 374 - 387   | 1786.7127 | 1785.7054 | 1785.8111 | -59  | 0    | K.VIAWYDNEWGYSQR.V                     |
| 388 - 400   | 1456.6131 | 1455.6058 | 1455.7722 | -114 | 0    | R.VVDLADIVANNWK.-                      |

Spot No.: **12**

Mascot score: **85**    Sequence coverage %: **35**

NCBI accession No.: **gi| 619894**

Matched peptides No.: **16**

Total peptides No.: **94**

Calculated Mr: **46805**

Calculated pI: **8.71**

### Annotated PMF spectra:

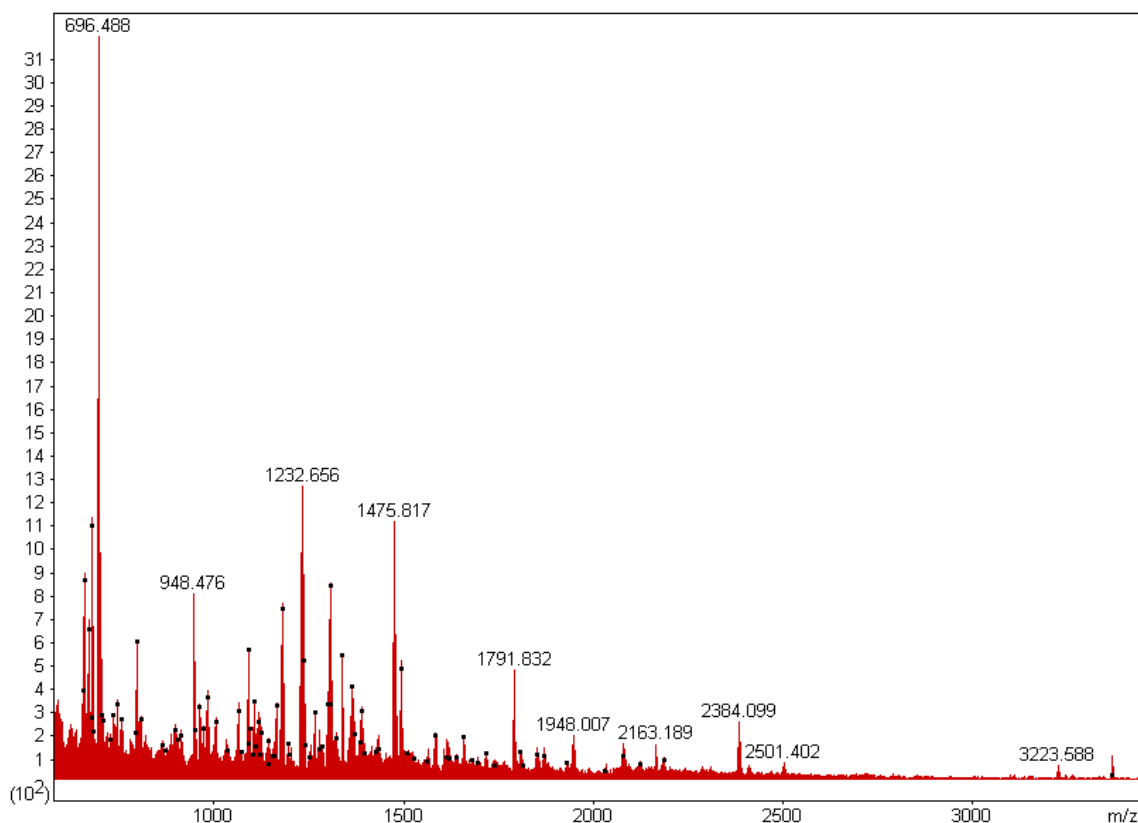

### Probability Based Mowse Score:

Protein score is  $-10 \cdot \log(P)$ , where P is the probability that the observed match is a random event. Protein scores greater than 72 are significant ( $p < 0.05$ ).

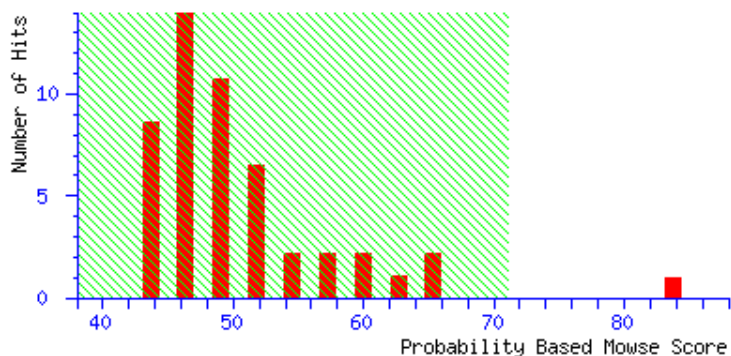



## Matched peptide sequences: shown in **Bold Red**

**1 MASGIMPSAG GKHRTDAMLV DKLPEEINEM KIRDDKAEKE** MEAAVVDGNG  
**51 TEKGHIIVTT IGGKNGEPKQ TISYMAERVV** GQGSFGIVFQ AKCLETGETV  
**101 AIKKVLQDKR** YKNRELQTIR **LLDHPNVVAL RHCFFSTTEK** DELYLNVLVLE  
**151 YVPETVYRVL RHYSKANQQM PMIYVKLYTY QIFRALAYIH** GIGVCHRDIK  
**201 PQNLLVNPHT HQLKLCDFGS AKVLVKGEPN** ISYICSRYYR APELIFGATE  
**251 YTFDAIDIWSV GCVLAELLG QPLFPGESGV** DQLVEIIKVL GTPTREEIKS  
**301 MNPNYTEFKF PQIKAHPWK IFHKRMPPEA VDLVSRLLOQ** SPNLRSTALE  
**351 ACTHTFFDEL RDPKTRLPNG RPLPLFNFR** PQELKGASAD LLNK**L**IP**EHA**  
**401 K**KQCTFLGV

## Matched peptides information:

| Start - End | Observed  | Mr(expt)  | Mr(calc)  | ppm | Miss Sequence                         |
|-------------|-----------|-----------|-----------|-----|---------------------------------------|
| 1 - 12      | 1122.5952 | 1121.5879 | 1121.5209 | 60  | 0 -.MASGIMPSAGGK.H Oxidation (M)      |
| 2 - 14      | 1284.6230 | 1283.6157 | 1283.6404 | -19 | 1 M.ASGIMPSAGGKHR.T Oxidation (M)     |
| 13 - 22     | 1201.6383 | 1200.6310 | 1200.5921 | 32  | 1 K.HRTDAMLVDK.L Oxidation (M)        |
| 23 - 31     | 1118.5542 | 1117.5469 | 1117.5325 | 13  | 0 K.LPEEINEMK.I Oxidation (M)         |
| 54 - 64     | 1095.5599 | 1094.5526 | 1094.6448 | -84 | 0 K.GHIIVTTIGGK.N                     |
| 65 - 78     | 1639.8497 | 1638.8424 | 1638.7671 | 46  | 1 K.NGEPKQTISYMAER.V Oxidation (M)    |
| 105 - 110   | 758.4561  | 757.4488  | 757.4446  | 6   | 1 K.VLQDKR.Y                          |
| 121 - 140   | 2384.0991 | 2383.0918 | 2383.2107 | -50 | 1 R.LLDHPNVVALRHCFFSTTEK.D            |
| 162 - 176   | 1869.9043 | 1868.8970 | 1868.8913 | 3   | 1 R.HYSKANQQMPMIYVK.L 2 Oxidation (M) |
| 166 - 176   | 1322.6758 | 1321.6685 | 1321.6522 | 12  | 0 K.ANQQMPMIYVK.L                     |
| 177 - 184   | 1103.5514 | 1102.5441 | 1102.5811 | -34 | 0 K.LYTYQIFR.A                        |
| 215 - 222   | 897.4624  | 896.4552  | 896.4062  | 55  | 0 K.LCDFGSAK.V                        |
| 310 - 320   | 1388.7377 | 1387.7304 | 1387.7513 | -15 | 1 K.FPQIKAHPWK.I                      |
| 315 - 324   | 1300.6208 | 1299.6135 | 1299.6989 | -66 | 1 K.AHPWHKIFHK.R                      |
| 325 - 336   | 1369.6896 | 1368.6823 | 1368.7184 | -26 | 1 K.RMPPEAVDLVSR.L                    |
| 395 - 401   | 807.4489  | 806.4416  | 806.4650  | -29 | 0 K.LIPEHAK.K                         |

Spot No.: **13**

Mascot score: **81**    Sequence coverage %: **21**

NCBI accession No.: **gi| 116055771**

Matched peptides No.: **12**

Total peptides No.: **126**

Calculated Mr: **63246**

Calculated pI: **9.35**

### Annotated PMF spectra:

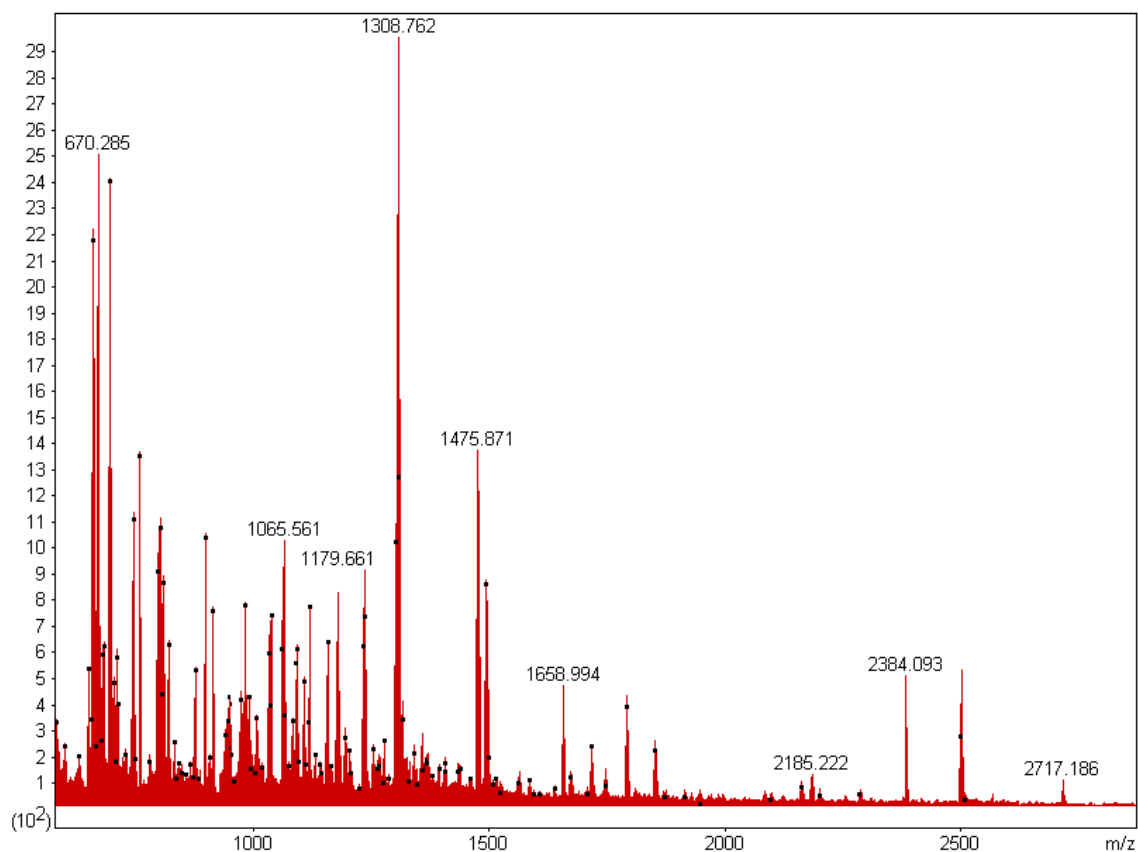

### Probability Based Mowse Score:

Protein score is  $-10 \cdot \log(P)$ , where P is the probability that the observed match is a random event. Protein scores greater than 72 are significant ( $p < 0.05$ ).

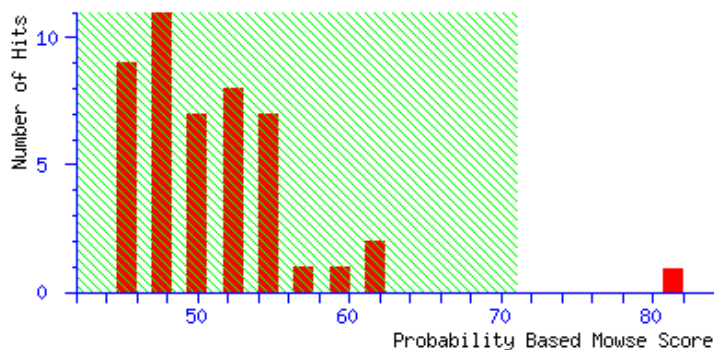

## Matched peptide sequences: shown in **Red**

**1** **MTNDTLLITD** **KLK**ALTALTP PLR**SSASSPI** **STAFPR**FDAR ATARASAHGD  
**51** VWT**PKS**NDRT RRR**TAA**MLIS QFFILG**PRGD** **ALAH**R**DFR**GD VFSTS**RED**FY  
**101** RSTR**FW**SSNE RSSVRSNRTT KTNAS**PPP**AF ERDGVN**YL**HV KASGL**YF**VAT  
**151** TTSNG**SP**SAV LELLGRLARL VKDYCGALTE DAVR**KN**STLV SEVIDEAM**DY**  
**201** GYAQT**T**STEM LRERVCSE**FV** ETGDDLAGVL VSAKADGARA VAQGA**FK**AGQ  
**251** KVEAVLE**KH**NL GVKV**NFP**TKA **AINL****HAASV** **ASGV****VR**SSS **ATQ**SVVSAS  
**301** **SAT**TRDEIFV DIIEKLN**V**TF SANGDV**V**TSE INGH**I**QVR**N**F LQ**G**AG**T**K**V**K  
**351** **AL**SE**DL**T**I**GG **K**GTSARGNYA GVILDDCN**F**H ESAKLE**Q**FDV DR**T**IT**L**R**P**PQ  
**401** GEFSLM**NY**RS **AGH****F**PP**F**KV IAI**F**DES**V**PY KVG**V**EL**K**LFA D**F**PS**K****H**CT**G**  
**451** **LIV****H**L**P**IP**E**KG ALGAT**G**RL**P**K SV**F**SG**S**Q**H**VM F**D**AAEK**Q****I**V**V** **Q****F**K**F**AG**G**S**D**  
**501** HECS**V**Q**I**ALQ SERIP**N**VRRE IG**P**LS**L**S**F**Q**I** P**T**FCASALAV R**Y**LQ**V**V**G**NR**P**  
**551** LD**P**LD**E**APP R**A**PH**R**W**I**RYL TK**SS****S****I****V****V****R****V**

## Matched peptides information:

| Start - End | Observed  | Mr (expt) | Mr (calc) | ppm | Miss Sequence                   |
|-------------|-----------|-----------|-----------|-----|---------------------------------|
| 1 - 11      | 1252.6521 | 1251.6448 | 1251.6017 | 34  | 0 -. <b>MTNDTLLITDK. L</b>      |
| 1 - 13      | 1493.8615 | 1492.8542 | 1492.7807 | 49  | 1 -. <b>MTNDTLLITDKL. A</b>     |
| 24 - 36     | 1307.7718 | 1306.7645 | 1306.6517 | 86  | 0 R. <b>SSASSPISTAFPR. F</b>    |
| 79 - 88     | 1157.6360 | 1156.6287 | 1156.5737 | 48  | 1 R. <b>GDALAHDFR. G</b>        |
| 270 - 286   | 1658.9937 | 1657.9864 | 1657.8569 | 78  | 0 K. <b>AAINLHAASVASGVVR. V</b> |
| 287 - 294   | 807.3897  | 806.3824  | 806.4134  | -38 | 0 R. <b>VSSSATQK. S</b>         |
| 295 - 305   | 1065.5607 | 1064.5534 | 1064.5462 | 7   | 0 K. <b>SVVSASSATTR. D</b>      |
| 350 - 361   | 1234.7108 | 1233.7035 | 1233.6275 | 62  | 0 K. <b>WALSEDLTIGGK. G</b>     |
| 410 - 419   | 1092.5533 | 1091.5460 | 1091.5764 | -28 | 0 R. <b>SAGHFPPFK. V</b>        |
| 446 - 459   | 1562.8788 | 1561.8715 | 1561.8650 | 4   | 0 K. <b>HTCTGLIVHLPIEK. G</b>   |
| 487 - 493   | 948.4624  | 947.4551  | 947.5229  | -72 | 0 K. <b>QIVVQFK. K</b>          |
| 573 - 579   | 797.3456  | 796.3383  | 796.4079  | -87 | 0 K. <b>SSIVVR. V</b>           |

Spot No.: **14**

Mascot score: **84** Sequence coverage %: **27**

NCBI accession No.: **gi| 147826444**

Matched peptides No.: **23**

Total peptides No.: **81**

Calculated Mr: **100047**

Calculated pI: **9.49**

### Annotated PMF spectra:

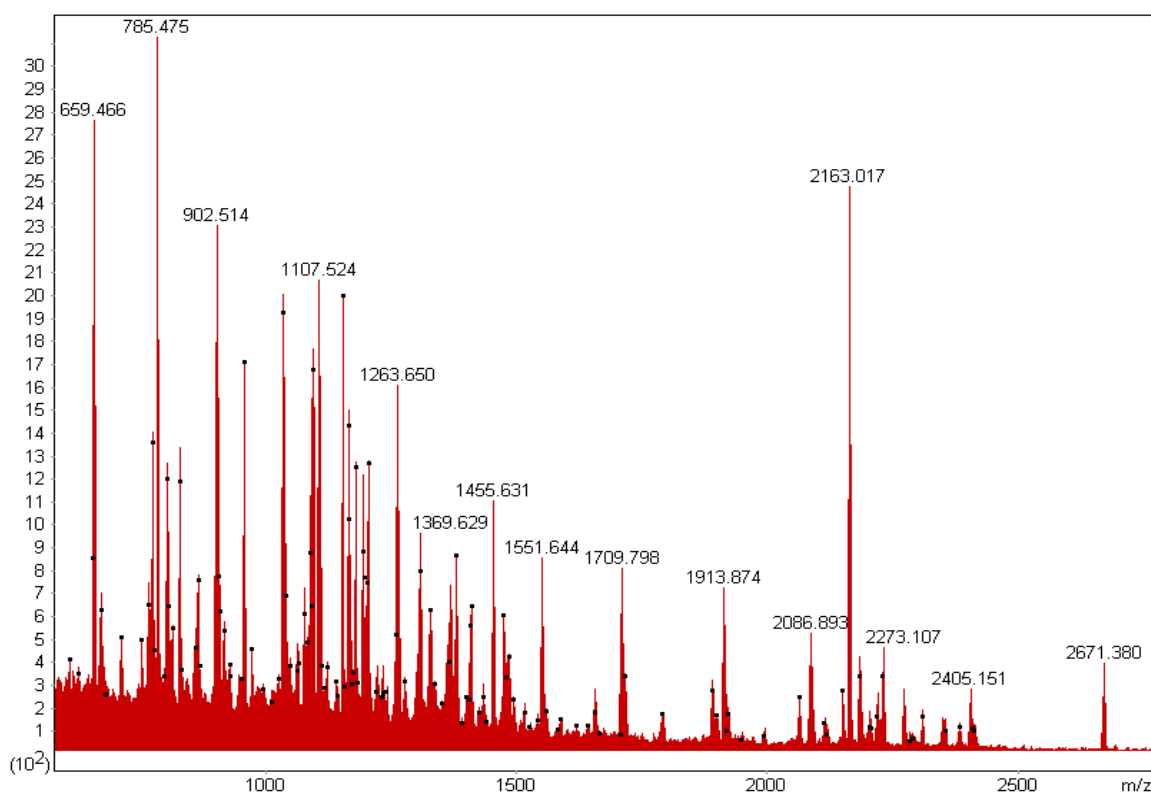

### Probability Based Mowse Score:

Protein score is  $-10 \cdot \log(P)$ , where P is the probability that the observed match is a random event. Protein scores greater than 72 are significant ( $p < 0.05$ ).

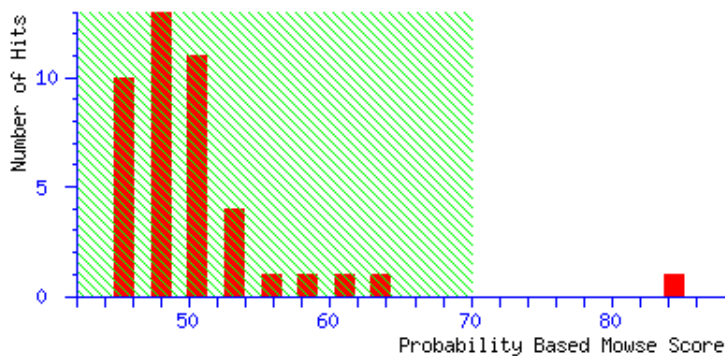

## Matched peptide sequences: shown in **Bold Red**

1 **MSPADEEKTA** **FITPHDLYCY** **RVMPFGLKNA** GATYQRLMTN IFKPLIGHTV  
 51 **EVYIDDIVVK** **SKTREEHVLH** **LQEVFHLLRK** **YSMKLNPSKC** **VFGVSAGKFL**  
 101 **GFMVSRGIE** **VSPDQIKAVM** **ETPPRSKKE** LQSLTGKLVA LGRFIARFTN  
 151 **ELQPFLLVIR** **KAGANGWMD** **CQNAFEKIKH** CLTQPPILSS PIPKEKLYMY  
 201 **LVVSEWAINA** **VLFRCPSPKE** **QKPIYYVNRA** LADVETRYSK **MELTALALRS**  
 251 **AAQKLRPFSQ** **AHPVVVLTQ** **PLRNILHKPD** **LTGRMLQWAI** **ELSKFRIEFQ**  
 301 **PRLSMKGQVM** **VDFVLKYSRR** **PSQRQEHSEK** **EWWTLRVDGA** **SRSSGSGVGL**  
 351 **LLQSPTGEHL** **EQAIGLGFPA** **SNNEAEYEA** LSGLALALAL SVSKLRVYSD  
 401 **SQLVVRHVQK** **EYEAKDECMA** **QYLAKWTIEK** **IKRTENGRAD** ALAGIAASLP  
 451 **IKETTFLPIH** **VQANSSVAET** **STCNAIEASQ** **PDSQEWNTDI** IQYLRTSTLP  
 501 **EDRKQAHKIR** **VQATRFTLIG** **GHLYKRSFTG** **PYLRCLSHSK** ALYVLAEMHE  
 551 **GVCGNHSGGR** **SLTHRAHSQG** **YYWPTMKKDA** **AAAIKKCDKC** QKHAPIPHMS  
 601 **SKTLKPISGP** **WPFAQWGM** **DI VGPLPTAPAQ** **KKFLLVATDY** FSKWVEVEAY  
 651 **ASIKDKDVTK** **FVWKNIIICRF** **GIPQTIIAYN** **GPQFDSIAFR** **NFCSELNIRN**  
 701 **SYSTPRYPQS** **NGQAEATNKT** **QITALKKRL** **E QAKGKWVEEL** PGVLWAYRTT  
 751 **PECPTGNTPF** **ALVYGMDAII** **PTEIGLPTIR** **TEAGKQDDAN** **TKLGRNLDWA**  
 801 **DKVREAAASIR** **MPDYQQRASA** **HYNRKAKPRS** **FKNGTLVLRK** EGPYIVSKSS  
 851 **ESGAYHLQKL** **DGTPLLRPWN** **VSNLKQYYQ**

## Matched peptides information:

| Start - End | Observed  | Mr(expt)  | Mr(calc)  | ppm  | Miss | Sequence                       |
|-------------|-----------|-----------|-----------|------|------|--------------------------------|
| 1 - 8       | 906.4874  | 905.4801  | 905.3800  | 111  | 0    | -.MSPADEEK.T                   |
| 9 - 21      | 1656.6855 | 1655.6782 | 1655.7766 | -59  | 0    | K.TAFITPHDLYCYR.V              |
| 22 - 28     | 807.4375  | 806.4302  | 806.4361  | -7   | 0    | R.VMPFGLK.N Oxidation (M)      |
| 80 - 84     | 672.4185  | 671.4112  | 671.3312  | 119  | 1    | R.KYSMK.L Oxidation (M)        |
| 99 - 117    | 2150.9782 | 2149.9709 | 2150.1194 | -69  | 1    | K.FLGMVSRGIEVSPDQIK.A          |
| 108 - 126   | 2064.0407 | 2063.0334 | 2063.0721 | -19  | 1    | R.GIEVSPDQIKAVMETPPPR.S        |
| 138 - 143   | 628.4320  | 627.4247  | 627.4068  | 29   | 0    | K.LVALGR.F                     |
| 161 - 177   | 1913.8741 | 1912.8668 | 1912.8196 | 25   | 1    | R.KAGANGWMDSCQNAFEK.I          |
| 238 - 249   | 1411.6248 | 1410.6175 | 1410.7540 | -97  | 1    | R.YSKMELTALALR.S Oxidation (M) |
| 274 - 284   | 1263.6499 | 1262.6426 | 1262.7095 | -53  | 0    | R.NILHKPDLTGR.M                |
| 285 - 294   | 1234.5768 | 1233.5695 | 1233.6427 | -59  | 0    | R.MLQWAIELSK.F Oxidation (M)   |
| 307 - 319   | 1541.6522 | 1540.6449 | 1540.8072 | -105 | 1    | K.GQVMVDFVLKYSR.R              |
| 317 - 324   | 1049.5163 | 1048.5090 | 1048.5526 | -42  | 1    | K.YSRRPSQR.Q                   |
| 331 - 342   | 1475.6816 | 1474.6743 | 1474.7317 | -39  | 1    | K.EWWTLRVDGASR.S               |
| 397 - 406   | 1165.5628 | 1164.5555 | 1164.6139 | -50  | 0    | R.VYSDSQLVVR.H                 |
| 426 - 432   | 917.4913  | 916.4840  | 916.5382  | -59  | 1    | K.WTIEKIK.R                    |
| 670 - 690   | 2355.1044 | 2354.0971 | 2354.2059 | -46  | 0    | R.FGIPQTIIAYNGPQFDSIAFR.N      |
| 707 - 719   | 1407.6396 | 1406.6323 | 1406.6426 | -7   | 0    | R.YPQSNQAEATNK.T               |
| 707 - 726   | 2163.0174 | 2162.0101 | 2162.0967 | -40  | 1    | R.YPQSNQAEATNKTQITALK.K        |
| 720 - 727   | 902.5141  | 901.5068  | 901.5596  | -59  | 1    | K.TQITALKK.R                   |
| 781 - 792   | 1277.6356 | 1276.6283 | 1276.5895 | 30   | 1    | R.TEAGKQDDANTK.L               |
| 826 - 832   | 833.4304  | 832.4232  | 832.4919  | -83  | 1    | K.AKPRSFK.N                    |
| 860 - 879   | 2405.1513 | 2404.1440 | 2404.2539 | -46  | 1    | K.LDGTPLLRPWNVSNLKQYYQ.-       |

Spot No.: **15**

Mascot score: **102**    Sequence coverage %: **33**

NCBI accession No.: **gi| 27752799**

Matched peptides No.: **18**

Total peptides No.: **86**

Calculated Mr: **47920**

Calculated pI: **6.12**

### Annotated PMF spectra:

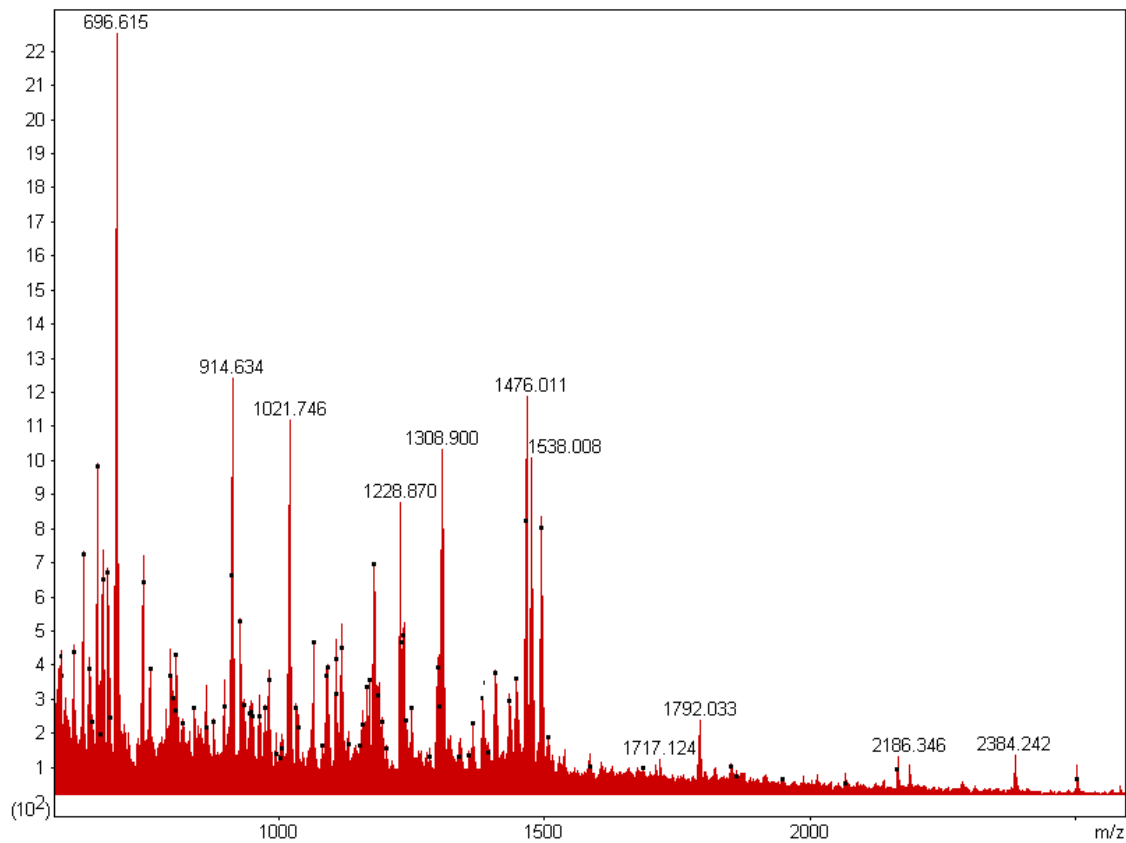

### Probability Based Mowse Score:

Protein score is  $-10 \cdot \log(P)$ , where P is the probability that the observed match is a random event. Protein scores greater than 72 are significant ( $p < 0.05$ ).

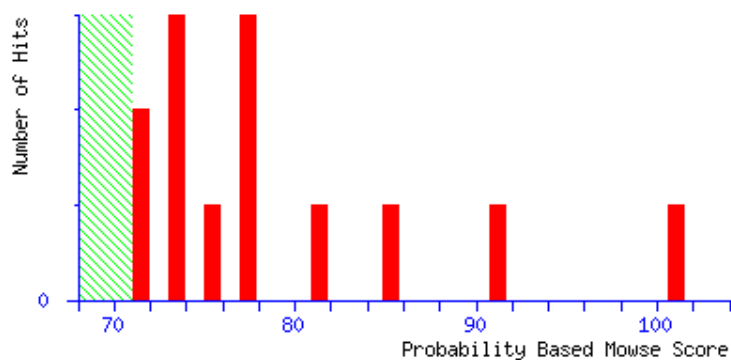

## Matched peptide sequences: shown in **Bold Red**

**1** **KLTYTPEYE TKDIDLAAF** RVTPQPGVPP EEAGAAVAEE SSTGTWTTVW  
**51** TDGLTSLDRY KGRCYHIEPV PGEETQFIAY VAYPLDLFEE GSVTNMFTSI  
**101** VGNVFGFKAL **AALRLEDLRI** PPAYTK**TFQG** **PPHGIQVERD** KLNKYGRPLL  
**151** GCTIKPKLGL SAKNYGRAVY **ECLRGGLDFT** **KDDENVNSQP** **FMRWRDRFLF**  
**201** CAEAIYKSQA ETGEIKGHYL NATAGTCEEM IKRAVFAREL GVPVIMHDYL  
**251** TGGFTANTSL SHYCRD**NGLL** **LHIHRAMHAV** **IDRQKNHGMH** **FRVLAKALRL**  
**301** **SGGDHIHAGT** **VVGKLEGDRE** **STLGFVDLLR** DDYVEKDRSR GIFFTQDWVS  
**351** LPGVLPVASG GIHVWHMPAL TEIFGDDSVL QFGGGTLGHP WGNAPGAVAN  
**401** RVALEACVQA **RNEGRDLAVE** **GNEIIREACK**

## Matched peptides information:

| Start - End | Observed  | Mr(expt)  | Mr(calc)  | ppm | Miss | Sequence                              |
|-------------|-----------|-----------|-----------|-----|------|---------------------------------------|
| 2 - 12      | 1407.9132 | 1406.9059 | 1406.6605 | 174 | 0    | K.LTYTPEYETK.D                        |
| 13 - 21     | 1021.7456 | 1020.7383 | 1020.5240 | 210 | 0    | K.DTDILAAFR.V                         |
| 109 - 114   | 614.5430  | 613.5357  | 613.3911  | 236 | 0    | K.ALAALR.L                            |
| 109 - 119   | 1240.8806 | 1239.8733 | 1239.7299 | 116 | 1    | K.ALAALRLEDLRI                        |
| 115 - 119   | 645.5053  | 644.4980  | 644.3493  | 231 | 0    | R.LEDLR.I                             |
| 127 - 139   | 1466.0006 | 1464.9933 | 1464.7474 | 168 | 0    | K.TFQPPHGIQVERD                       |
| 168 - 174   | 910.6410  | 909.6337  | 909.4378  | 215 | 0    | R.AVYECLR.G                           |
| 175 - 193   | 2186.3457 | 2185.3384 | 2184.9746 | 167 | 1    | R.GGLDFTKDDENVNSQPFMR.W Oxidation (M) |
| 194 - 197   | 632.5038  | 631.4965  | 631.3190  | 281 | 1    | R.WRDR.F                              |
| 266 - 275   | 1187.8568 | 1186.8495 | 1186.6571 | 162 | 0    | R.DNGLLLHIHR.A                        |
| 276 - 283   | 928.6674  | 927.6602  | 927.4596  | 216 | 0    | R.AMHAVIDR.Q Oxidation (M)            |
| 284 - 292   | 1170.8223 | 1169.8150 | 1169.5512 | 226 | 1    | R.QKNHGMHFR.V Oxidation (M)           |
| 286 - 292   | 914.6343  | 913.6270  | 913.3977  | 251 | 0    | K.NHGMHFR.V Oxidation (M)             |
| 300 - 314   | 1448.0036 | 1446.9963 | 1446.7579 | 165 | 0    | R.LSGGDHIHAGTVVGK.L                   |
| 320 - 330   | 1249.8752 | 1248.8679 | 1248.6714 | 157 | 0    | R.ESTLGFVDLLR.D                       |
| 412 - 426   | 1685.1143 | 1684.1070 | 1683.8540 | 150 | 1    | R.NEGRDLAVEGNEIIR.E                   |
| 416 - 426   | 1228.8698 | 1227.8625 | 1227.6459 | 176 | 0    | R.DLAVEGNEIIR.E                       |
| 416 - 430   | 1717.1236 | 1716.1163 | 1715.8512 | 155 | 1    | R.DLAVEGNEIIREACK.-                   |

Spot No.: **16**

Mascot score: **82**

Sequence coverage %: **21**

NCBI accession No.: **gi| 226463312**

Matched peptides No.: **28**

Total peptides No.: **84**

Calculated Mr: **111653**

Calculated pI: **9.23**

### Annotated PMF spectra:

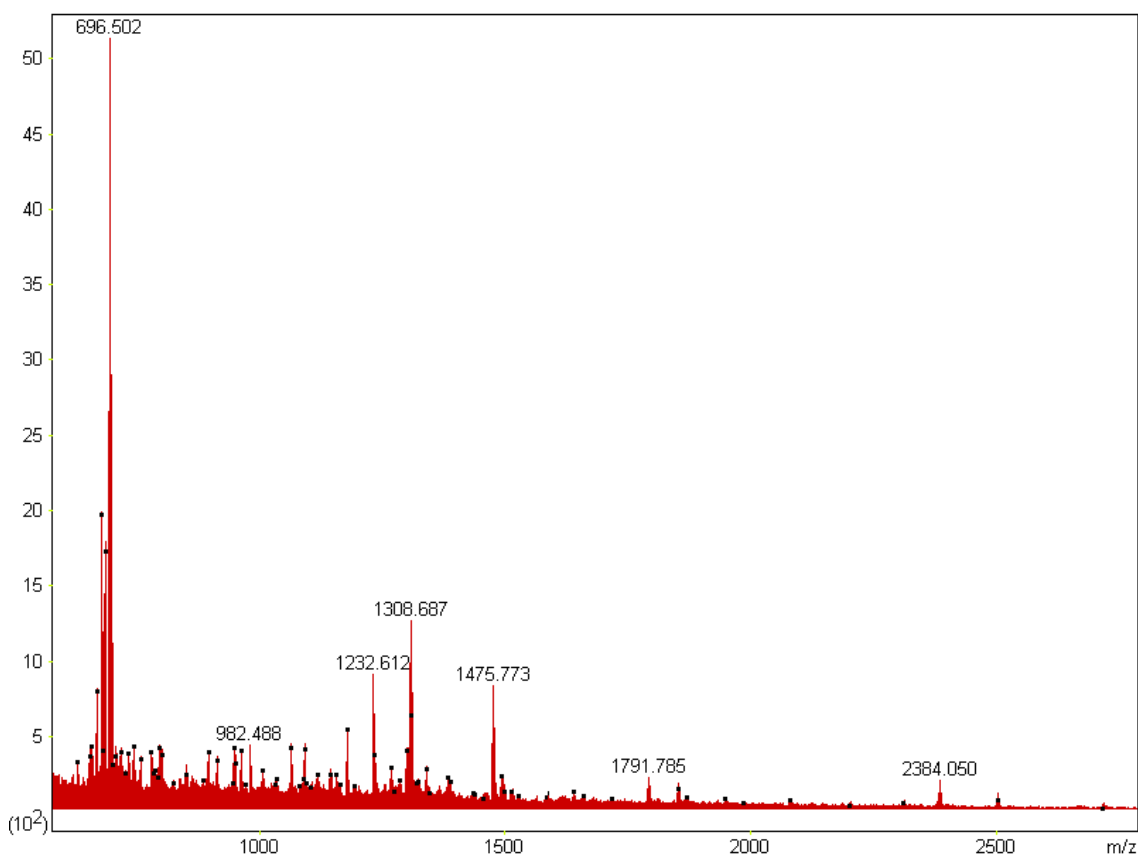

### Probability Based Mowse Score:

Protein score is  $-10 \cdot \log(P)$ , where  $P$  is the probability that the observed match is a random event. Protein scores greater than 72 are significant ( $p < 0.05$ ).

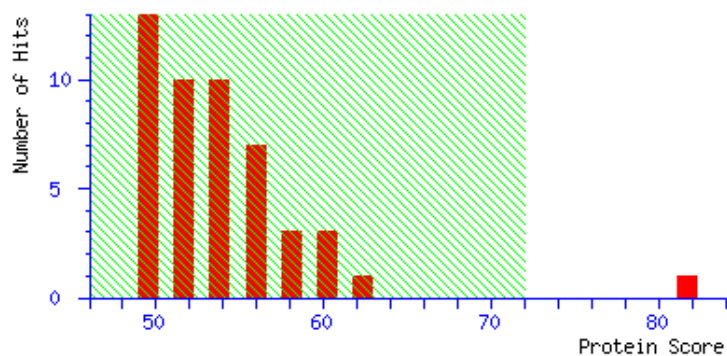



## Matched peptide sequences: shown in **Bold Red**

```

1  MATTMTSSPL QDRSNDAKLS PFSTRSKSVL GASAVAKSAL SKKSKSVVYQ
51 DENAHATPTK SSKSSTSAAE KSLDKVADEN DKLRDLNKRL LAELKNARVS
101 AKDAADAAAA NASASVENGE SVEKLTTQND ALRELNRMKI AHLKAAKLEA
151 SSSAAEIDSL RAANEASSKE LAKALQKAET KYAFQIADAL TATAKAQEAA
201 AKANAHAADL RASADAERRD SATLKSLNDR ALAELKESRD AMESMNAAGA
251 TLSESMKLAE SQRDGLQATN ASLTTELRAA KKASAAAVAA AEANVLKKHA
301 KAMQEAKVAA AKENEMLREV NAKLVRTLKQ AQADSVGVAD AGDQLKALNA
351 KLLAELKKAR AEANDAKNSS EGSAKAAAASA HEMLKSVIHA RAELLAANAQ
401 ALSELQFMKE ASEHAHAHAV DAAARLSDAE HQRDSLKALN VNVLNKLEA
451 KAETAKAASD AAAALKRHSE LAADRERVEE QRANLQELNR RLISEARRAR
501 AEFGRELAR AQMEKAKEDA EASVKAHAAN AEALKAQVAE KHAELARIEK
551 QTAKKIAEKE IAVAKAQAAE ADAEAKAAAA QLTMNGNLES QKKEAAGVLE
601 KVTQEKQALS SRLEIALQEL LEESAALKDA RESVKSLDAK LHAAACELKD
651 SCAGLTAASD ALVAAAEANA AKDKRVKMLE KECVKLTNAF AESEIHRMD
701 LEAAVEAHAQ ETAKTEKLEN VLKMTKIAAT HKHEQHKATT AKLHGEIAGA
751 KKAEAAAKAL ARAERDAAAD ATKTRDAAAK EAARANDRAK AATADALAAK
801 AAAKEETAAA KREIADAKN AARSAKASAA AAAAAAAAEK RACAAEREMA
851 AAASRAAKAV KAAEDAATAK VAVADKRLAQ TMAKHAASEH EAATQRAAAA
901 KLESALAAAN AALTTANAAN ATLREQDAKR HEKELARVVA KADAHVAELA
951 AELVAARATV NAANAELARR SNDLRRMKEI SGSVSRSLKA DASDAAARAD
1001 AMCVEVTGLE MRTESLESAL KAADAALAAA NREKCAAKRR EKFALFGLAI
1051 AAVRALLSAL AKARK

```

## Matched peptides information:

| Start - End | Observed  | Mr (expt) | Mr (calc) | ppm  | Miss | Sequence                               |
|-------------|-----------|-----------|-----------|------|------|----------------------------------------|
| 1 - 13      | 1438.6840 | 1437.6767 | 1437.6592 | 12   | 0    | -.MATTMTSSPLQDR.S                      |
| 1 - 18      | 1985.9572 | 1984.9499 | 1984.8830 | 34   | 1    | -.MATTMTSSPLQDRSNDAK.L 2 Oxidation (M) |
| 2 - 13      | 1307.6766 | 1306.6693 | 1306.6187 | 39   | 0    | M.ATTMTSSPLQDR.S                       |
| 2 - 13      | 1323.6473 | 1322.6400 | 1322.6136 | 20   | 0    | M.ATTMTSSPLQDR.S Oxidation (M)         |
| 46 - 60     | 1659.7658 | 1658.7585 | 1658.7900 | -19  | 0    | K.SVVYQDENAHATPTK.S                    |
| 61 - 71     | 1082.5637 | 1081.5564 | 1081.5251 | 29   | 1    | K.SSKSSTSAAEK.S                        |
| 64 - 71     | 780.4469  | 779.4396  | 779.3661  | 94   | 0    | K.SSTSAAEK.S                           |
| 96 - 102    | 745.4670  | 744.4597  | 744.4242  | 48   | 1    | K.NARVSAK.D                            |
| 134 - 138   | 659.4297  | 658.4224  | 658.3762  | 70   | 1    | R.ELNRK.M                              |
| 139 - 144   | 728.4388  | 727.4316  | 727.4051  | 36   | 0    | K.MIAHLK.A Oxidation (M)               |
| 139 - 147   | 982.4880  | 981.4807  | 981.5793  | -100 | 1    | K.MIAHLKAAK.L                          |
| 258 - 263   | 703.4284  | 702.4211  | 702.3660  | 78   | 0    | K.LAESQR.D                             |
| 352 - 357   | 686.4757  | 685.4684  | 685.4374  | 45   | 0    | K.LLAE <b>LK</b> .K                    |
| 361 - 367   | 718.4648  | 717.4575  | 717.3293  | 179  | 0    | R.AEANDAK.N                            |
| 386 - 391   | 682.4060  | 681.3988  | 681.3922  | 10   | 0    | K.SVIHAR.A                             |
| 392 - 409   | 1947.9517 | 1946.9444 | 1947.0135 | -35  | 0    | R.AELLAANAQALSELQFMK.E                 |
| 452 - 466   | 1388.7027 | 1387.6954 | 1387.7307 | -25  | 1    | K.AETAKAASDAAAALK.R                    |
| 476 - 482   | 945.5107  | 944.5034  | 944.4675  | 38   | 1    | R.ERVEEQR.A                            |
| 542 - 547   | 696.5019  | 695.4947  | 695.3714  | 177  | 0    | K.HAE <b>LAR</b> .I                    |
| 636 - 649   | 1526.7733 | 1525.7660 | 1525.7922 | -17  | 1    | K.SLD <b>AKLHAAACE</b> LK.D            |
| 678 - 685   | 1036.5406 | 1035.5333 | 1035.5093 | 23   | 1    | K.MLE <b>KECVK</b> .L                  |
| 763 - 773   | 1118.5438 | 1117.5365 | 1117.5363 | 0    | 1    | R.AERDAAADATK.T                        |
| 812 - 818   | 802.4746  | 801.4673  | 801.4344  | 41   | 1    | K.REIADAK.K                            |
| 827 - 841   | 1300.5774 | 1299.5701 | 1299.6894 | -92  | 1    | K.ASAAAAAAAAAAEKR.A                    |
| 848 - 858   | 1092.5406 | 1091.5333 | 1091.5393 | -5   | 1    | R.EMAAAASRAAK.A Oxidation (M)          |
| 859 - 870   | 1145.5778 | 1144.5705 | 1144.6088 | -33  | 1    | K.AV <b>KAAEDAATAK</b> .V              |
| 871 - 877   | 758.4871  | 757.4798  | 757.4446  | 46   | 1    | K.VAVADKR.L                            |
| 934 - 941   | 885.4759  | 884.4686  | 884.5443  | -86  | 1    | K.ELAR <b>VVAK</b> .A                  |

Spot No.: **17**

Mascot score: **84** Sequence coverage %: **42**

NCBI accession No.: **gi| 159475545**

Matched peptides No.: **18**

Total peptides No.: **122**

Calculated Mr: **40712**

Calculated pI: **8.87**

### Annotated PMF spectra:

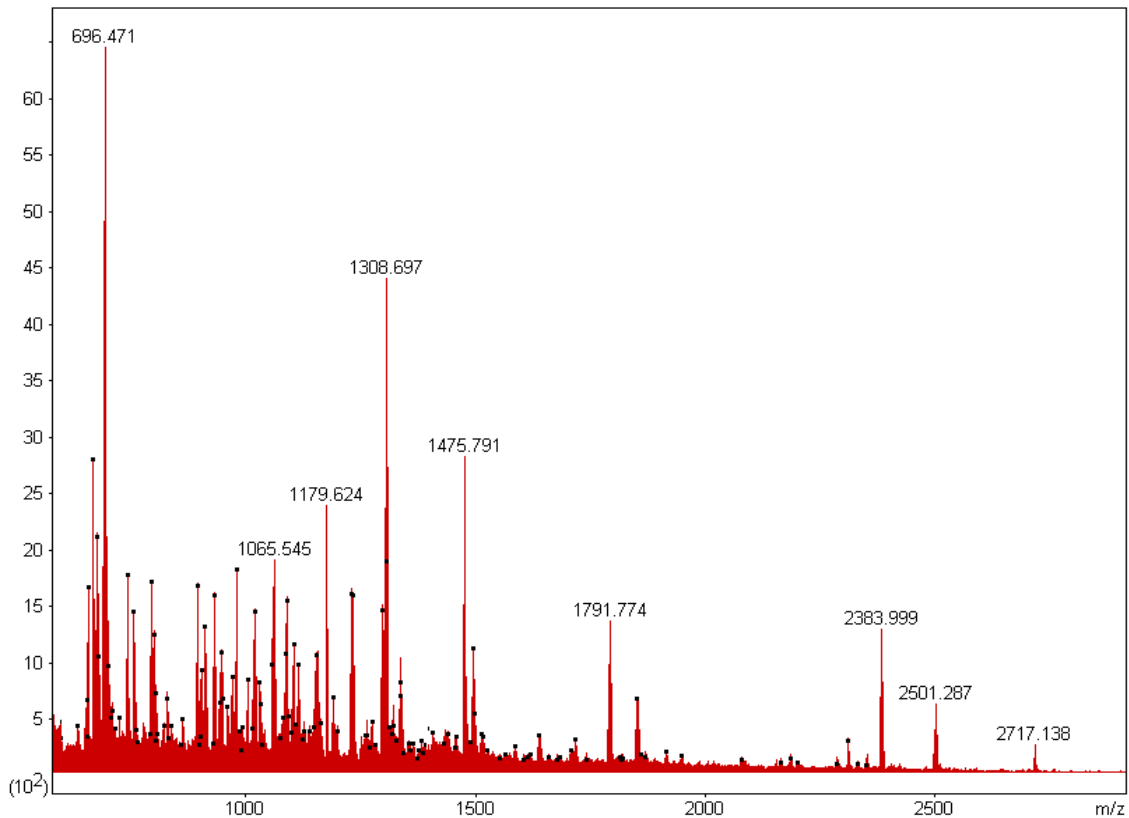

### Probability Based Mowse Score:

Protein score is  $-10 \cdot \log(P)$ , where  $P$  is the probability that the observed match is a random event. Protein scores greater than 72 are significant ( $p < 0.05$ ).

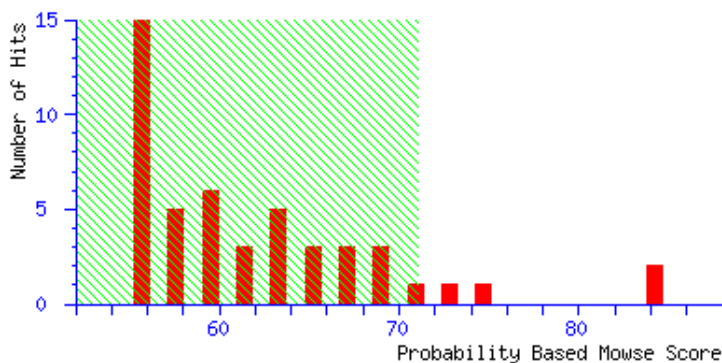

Matched peptide sequences: shown in **Bold Red**

1 MPLWVDKYRP NSFDFKVVHK DIADNLKKLV ATGDFPHTLF YGPPGAGG**KT**  
 51 **LVMALLRAIY GAGVEKVRVE** TKPWKIDLPS RKLEVELTTL SSNHHLELNP  
 101 ADVGSNDRYV VQEIIEKEMAR **SRPMGADGSR GFKVLVLNEV DRLSKEAQQG**  
 151 **LRRTMEKYSS ACRLIMVCSN** VSKVMEPVRS **RCLCVRVAAP SDAQVMEVLQ**  
 201 **GVAKKENLVL PEAFARVVD** YAGRNLRRAL LCLEVCRAQQ YPFGDSQEPQ  
 251 **RADWELYIAE VAKNIMDEQS** PKQLYLVRSK LYELLANCVP PELIMRQLTF  
 301 ELLKRMDDEI KLETVSYAAQ FEQRLQEGAK **AIFHLEAFVA RVMSNVKTYL**  
 351 **VSCGLA**

Matched peptides information:

| Start - End | Observed  | Mr(expt)  | Mr(calc)  | ppm | Miss Sequence                 |               |
|-------------|-----------|-----------|-----------|-----|-------------------------------|---------------|
| 49 - 57     | 1060.5631 | 1059.5558 | 1059.6474 | -86 | 1 K.KTLMALLR.A                | Oxidation (M) |
| 50 - 57     | 932.4764  | 931.4692  | 931.5525  | -89 | 0 K.TLMALLR.A                 | Oxidation (M) |
| 58 - 66     | 907.5123  | 906.5051  | 906.4811  | 26  | 0 R.AIYGAGVEK.V               |               |
| 121 - 130   | 1033.5423 | 1032.5350 | 1032.4771 | 56  | 0 R.SRPMGADGSR.G              |               |
| 121 - 133   | 1365.6888 | 1364.6815 | 1364.6619 | 14  | 1 R.SRPMGADGSRGFK.V           |               |
| 131 - 142   | 1388.7148 | 1387.7075 | 1387.7823 | -54 | 1 R.GFKVLVLNEVDR.L            |               |
| 134 - 145   | 1384.7058 | 1383.6985 | 1383.8085 | -80 | 1 K.VLVLNEVDRLSK.E            |               |
| 143 - 152   | 1129.5589 | 1128.5516 | 1128.6251 | -65 | 1 R.LSKEAQQGLR.R              |               |
| 154 - 163   | 1232.6222 | 1231.6149 | 1231.5325 | 67  | 1 R.TMEKYSSACR.L              |               |
| 174 - 181   | 973.5272  | 972.5200  | 972.5175  | 3   | 1 K.VMEPVRSR.C                |               |
| 174 - 181   | 989.5272  | 988.5200  | 988.5124  | 8   | 1 K.VMEPVRSR.C                | Oxidation (M) |
| 182 - 204   | 2501.2869 | 2500.2796 | 2500.2600 | 8   | 1 R.CLCVRVAAPSDAQVMEVLQGVAK.K |               |
| 206 - 217   | 1329.6766 | 1328.6693 | 1328.7088 | -30 | 0 K.ENLVLPEAFAR.V             |               |
| 252 - 263   | 1407.7185 | 1406.7112 | 1406.7081 | 2   | 0 R.ADWELYIAEVAK.N            |               |
| 264 - 272   | 1077.5257 | 1076.5184 | 1076.4808 | 35  | 0 K.HIMDEQSPK.Q               | Oxidation (M) |
| 331 - 341   | 1273.5961 | 1272.5888 | 1272.6979 | -86 | 0 K.AIFHLEAFVAR.V             |               |
| 331 - 347   | 1947.9157 | 1946.9084 | 1947.0400 | -68 | 1 K.AIFHLEAFVARVMSNVK.T       | Oxidation (M) |
| 342 - 356   | 1657.8564 | 1656.8491 | 1656.8215 | 17  | 1 R.VMSNVKTYLVSCGLA.-         | Oxidation (M) |

Spot No.: **18**

Mascot score: **107**

Sequence coverage %: **20**

NCBI accession No.: **gi| 4586021**

Matched peptides No.: **23**

Total peptides No.: **71**

Calculated Mr: **98720**

Calculated pI: **5.79**

### Annotated PMF spectra:

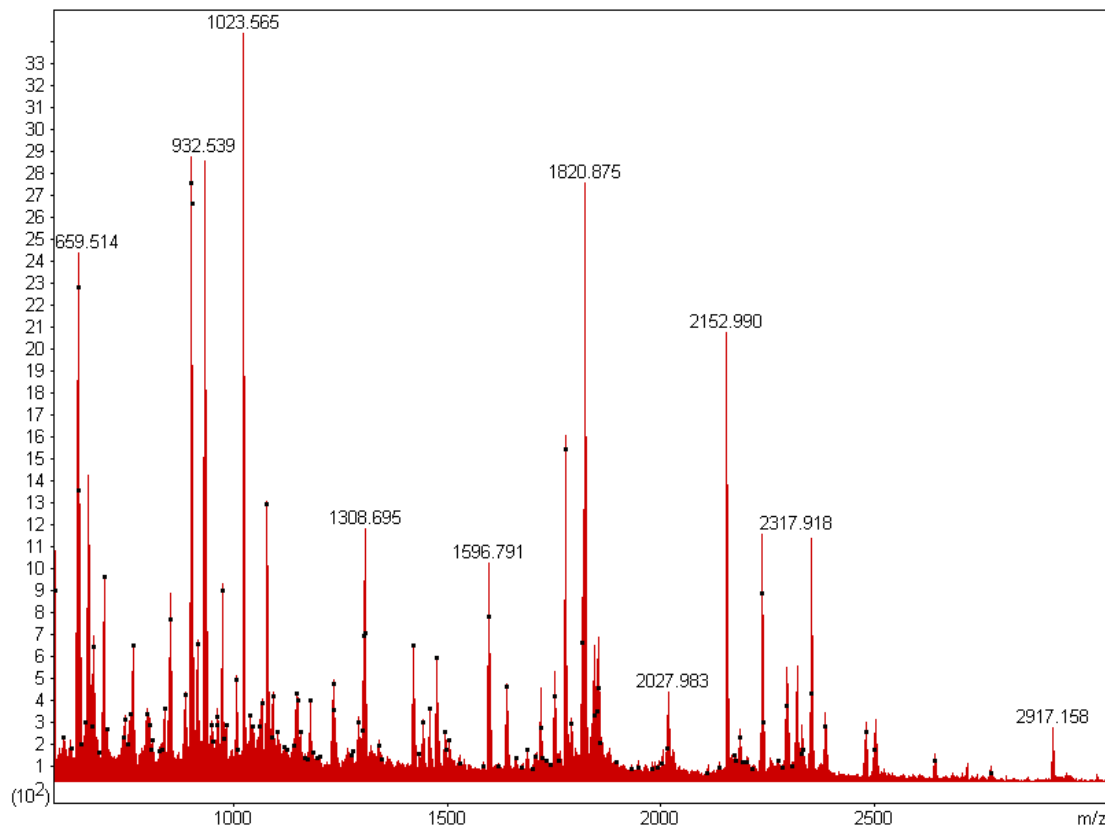

### Probability Based Mowse Score:

Protein score is  $-10 \cdot \log(P)$ , where P is the probability that the observed match is a random event. Protein scores greater than 72 are significant ( $p < 0.05$ ).

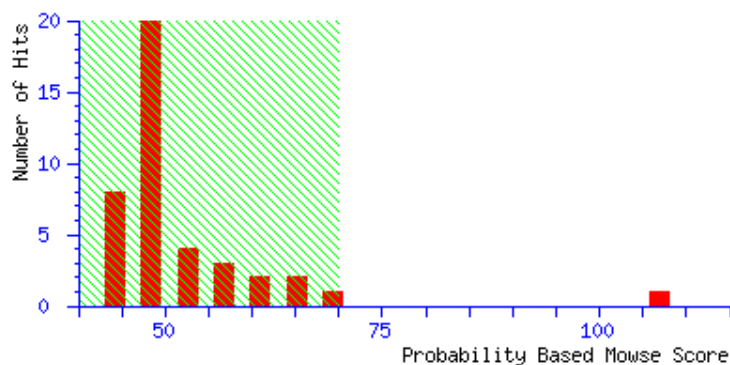

## Matched peptide sequences: shown in **Bold Red**

```

1 MASEHPFKGI FTTLPKPGGG EFGKFYSLPA LNDPRVDKLP YSIRILLESA
51 IRNCDNFQVT KEDVEKIIDW EKTSPKQVEI PFKPARVLLQ DFTGVPVAVD
101 LACMRDAMNK LGSDSNKINP LVPVDLVIDH SVQVDVARSE NAVQANMELE
151 FQRNKERFAF LKWGSTAFQN MLVVPPGSGI VHQVNLEYLG RVVFNTKGLL
201 YPDSVVGTDS HTTMIDGLGV AGWGVGGIEA EATMLGQPMS MVLPGVVGFK
251 LAGKMRNGVT ATDLVLTVTQ MLRKHGTVGK FVEFYGNMS GLSLADRATI
301 ANMSPEYGAT MGFFPVDHVT LQYLKLTGRS DETVAMIEAY LRANNMFVDY
351 NEPQQDRVYS SYLELNLDV EPCISGPKRP HDRVTLKEMK ADWHSCLDSK
401 VGFKGFAIPK EAQEKVVNFS FDGQPAELKH GSVVIAAITS CTNTSNPSVM
451 LGAGLVAKKA CDLGLQVKPW IKTSLAPGSG VVTKYLLKSG LQEYLNEQGF
501 NIVVGCTTC IGNSGEINES VGAAITENDI VAAAVLSGNR NFEGRVHPLT
551 RANYLASPPL VVAYALAGTV NIDFETEPIG KGKNGKDVFL RDIWPTTEEI
601 AEVVQSSVLP DMFRATYESI TKGNPMWNKL SVPENTLYSW DPNSTYIHEP
651 PYFKDMTMDP GPHNVKDAY CLLNFGDSIT TDHISPAGNI QKDSPAAKFL
701 MERGVDRKDF NSYGSRRGND EIMARGTFAN IRIVNKLMNG EVGPKTVHIP
751 SGEKLSVFDA AMRYKSSGED TIILAGAEYG SGSSRDWAAK GPMLQGVKAV
801 IAKSFERIHR SNLVGMGIIP LCFKSGEDAD TLGLTGHERY TIHLPTDISE
851 IRPGQDVTVT TDNGKSTCT VRFDTEVELA YFNHGGILPY VIRNLSKQ

```

## Matched peptides information:

| Start - End | Observed  | Mr (expt) | Mr (calc) | ppm | Miss Sequence                          |
|-------------|-----------|-----------|-----------|-----|----------------------------------------|
| 25 - 35     | 1292.7140 | 1291.7067 | 1291.6561 | 39  | 0 K.FYSLPALNDPR.V                      |
| 45 - 52     | 914.6371  | 913.6298  | 913.5596  | 77  | 0 R.ILLES <b>A</b> .N                  |
| 77 - 86     | 1184.7371 | 1183.7298 | 1183.6713 | 49  | 0 K.QVEI <b>PFK</b> PAR.V              |
| 192 - 197   | 707.4732  | 706.4660  | 706.4014  | 91  | 0 R.VV <b>FNTK</b> .G                  |
| 330 - 342   | 1497.7968 | 1496.7895 | 1496.7181 | 48  | 0 R.SDETVAMIEAYLR.A                    |
| 330 - 342   | 1513.7895 | 1512.7822 | 1512.7130 | 46  | 0 R.SDETVAMIEAYLR.A Oxidation (M)      |
| 343 - 357   | 1840.8405 | 1839.8332 | 1839.7846 | 26  | 0 R.ANNMFVDYNEPQQDR.V                  |
| 401 - 410   | 1063.5641 | 1062.5568 | 1062.6226 | -62 | 1 K.VGFKGF <b>AI</b> PK.E              |
| 541 - 545   | 622.4040  | 621.3968  | 621.2871  | 177 | 0 R.NFEGR.V                            |
| 546 - 551   | 722.5078  | 721.5005  | 721.4235  | 107 | 0 R.VHPLTR.A                           |
| 623 - 629   | 862.4907  | 861.4834  | 861.3803  | 120 | 0 K.GN <b>PM</b> WNK.L Oxidation (M)   |
| 708 - 716   | 1073.5702 | 1072.5629 | 1072.4938 | 64  | 1 R.KDFNSYGS <b>R</b> .R               |
| 709 - 716   | 945.4952  | 944.4879  | 944.3988  | 94  | 0 K.DFNSYGS <b>R</b> .R                |
| 717 - 725   | 1077.5212 | 1076.5139 | 1076.5033 | 10  | 1 R.RGNDEIMAR.G Oxidation (M)          |
| 726 - 732   | 778.5166  | 777.5094  | 777.4133  | 124 | 0 R.GTFANIR.I                          |
| 726 - 736   | 1232.6783 | 1231.6710 | 1231.7037 | -27 | 1 R.GTFANIRIVNK.L                      |
| 746 - 754   | 967.5365  | 966.5292  | 966.5134  | 16  | 0 K.TVHIPS <b>G</b> EK.L               |
| 755 - 763   | 1009.5864 | 1008.5791 | 1008.5062 | 72  | 0 K.LSVF <b>DA</b> AMR.Y               |
| 755 - 763   | 1025.5695 | 1024.5622 | 1024.5012 | 60  | 0 K.LSVF <b>DA</b> AMR.Y Oxidation (M) |
| 766 - 785   | 1956.9583 | 1955.9510 | 1955.9072 | 22  | 0 K.SSGEDTIILAGAEYSGSS <b>R</b> .D     |
| 791 - 798   | 829.3971  | 828.3898  | 828.4528  | -76 | 0 K.GPMLQ <b>G</b> VK.A                |
| 825 - 839   | 1557.7875 | 1556.7802 | 1556.7067 | 47  | 0 K.SGEDADTLGLT <b>G</b> HER.Y         |
| 866 - 872   | 870.5138  | 869.5065  | 869.4066  | 115 | 0 K.S <b>FT</b> CTVR.F                 |

Spot No.: **19**

Mascot score: **155** Sequence coverage %: **31**

NCBI accession No.: **gi| 18407650**

Matched peptides No.: **27**

Total peptides No.: **71**

Calculated Mr: **86345**

Calculated pI: **5.43**

### Annotated PMF spectra:

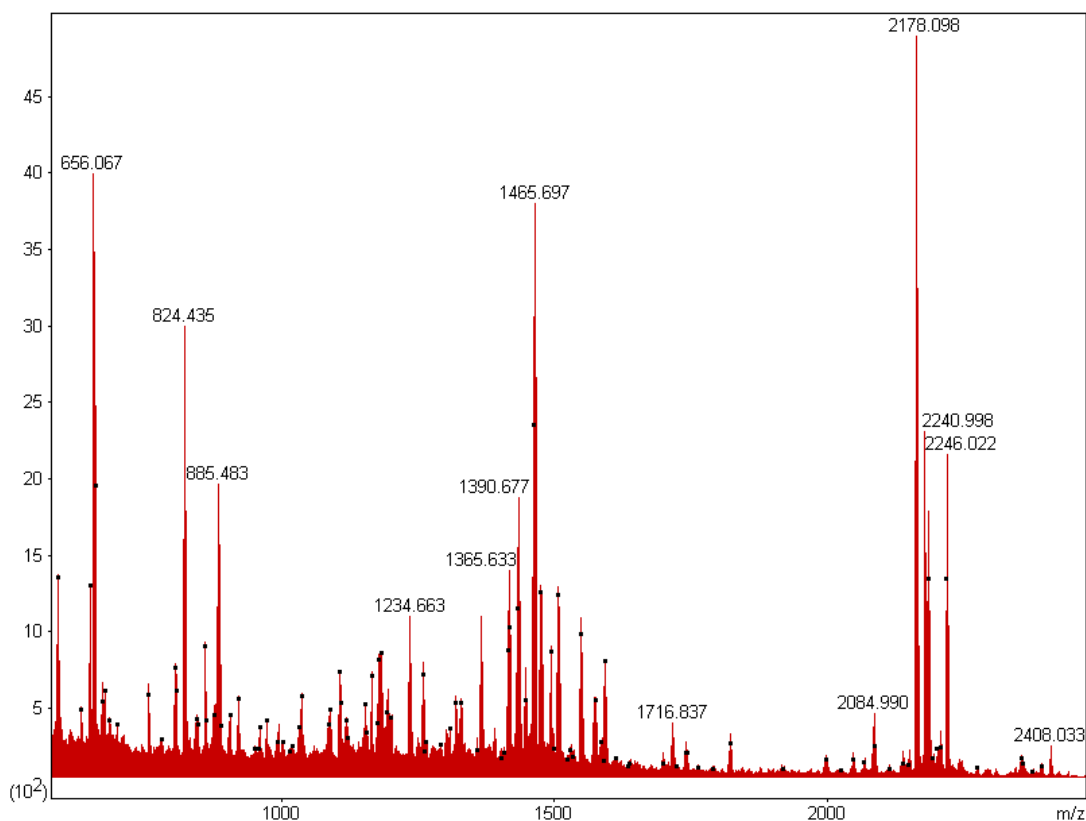

### Probability Based Mowse Score:

Protein score is  $-10 \cdot \log(P)$ , where P is the probability that the observed match is a random event. Protein scores greater than 72 are significant ( $p < 0.05$ ).

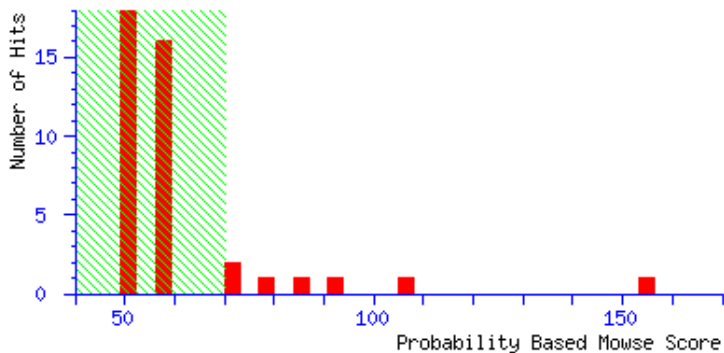

## Matched peptide sequences: shown in **Bold Red**

```

1 MAADALRISS SSSGSLVCNL NGSQRRPVLL PLSHRATFLG LPPRASSSSI
51 SSSIPQFLGT SRIGLGSSKL SQKKKQFSVF AAAEAEAKRA VPLKDYRNIG
101 IMAHIDAGKT TTTERILYTT GRNYKIGEVH EGTATMDWME QEQERGITIT
151 SAATTTTWDK HRINIIDTPG HVDFLEVER ALRVLDGAIC LFDSVAGVEP
201 QSETVWRQAD KYGVPRICFV NKMDRLGANF FRTRDMIVTN LGAKPLVLQI
251 PIGAEDVFKG VVDLVRMKAI VWSGEELGAK FSYEDIPEDL EDLAQEYRAA
301 MMELIVLDD EVMENYLEGV EPDEATVKRL VRKGTITGKF VPILCGSAFK
351 NKGVQPLLDA VVDYLPSPVE VPPMNGTDPE NPEITIIIRKP DDDEPFAGLA
401 FKIMSDPFVG SLTFVRVYSG KISAGSYVLN ANKGKKERIG RLLEMHANSR
451 EDVKVALTGD IIALAGLKDT ITGETLSDPE NPVLERMDF PDPVIKVAIE
501 PKTKADIDKM ATGLIKLAQE DPSFHSRDE EMNQTVIEGM GELHLEIIVD
551 RLKREFKVEA NVGAPQVNYR ESISKIAEVK YTHKKQSGGQ GQFADITVRF
601 EPLEAGSGYE FKSEIKGGAV PREYIPGVMK GLEECMSTGV LAGFPVVDVR
651 ACLVDGSYHD VDSSVLAFLQ AARGAFREGM RKAGPRMLEP IMRVEVVTPE
701 EHLGDVIGDL NSRRGQINSF GDKPGGLKVV DSLVPLAEMF QYVSTLRGMT
751 KGRASYTMQL AKFDVVPQHI QNQLSSKDQE VAA

```

## Matched peptides information:

| Start - End | Observed  | Mr(expt)  | Mr(calc)  | ppm | Miss Sequence                             |
|-------------|-----------|-----------|-----------|-----|-------------------------------------------|
| 90 - 97     | 961.5208  | 960.5135  | 960.5392  | -27 | 1 R.AVPLKDYR.N                            |
| 110 - 122   | 1574.8046 | 1573.7973 | 1573.8100 | -8  | 1 K.TTTERILYTTGR.N                        |
| 116 - 122   | 885.4830  | 884.4757  | 884.4756  | 0   | 0 R.ILYTTGR.N                             |
| 126 - 145   | 2376.0685 | 2375.0612 | 2375.0158 | 19  | 0 K.IGEVHEGTATMDWMEQEQR.G                 |
| 126 - 145   | 2392.0079 | 2391.0006 | 2391.0107 | -4  | 0 K.IGEVHEGTATMDWMEQEQR.G Oxidation (M)   |
| 126 - 145   | 2408.0327 | 2407.0254 | 2407.0056 | 8   | 0 K.IGEVHEGTATMDWMEQEQR.G 2 Oxidation (M) |
| 163 - 180   | 2068.0217 | 2067.0144 | 2067.0637 | -24 | 0 R.INIIDTPGHVDFLEVER.A                   |
| 208 - 216   | 1033.5074 | 1032.5001 | 1032.5352 | -34 | 1 R.QADKYGVPR.I                           |
| 212 - 216   | 591.3073  | 590.3000  | 590.3176  | -30 | 0 K.YGVPR.I                               |
| 217 - 222   | 780.3829  | 779.3757  | 779.4000  | -31 | 0 R.ICFVVK.M                              |
| 226 - 232   | 824.4354  | 823.4282  | 823.4341  | -7  | 0 R.LGANFFR.T                             |
| 260 - 266   | 757.4362  | 756.4289  | 756.4494  | -27 | 0 K.GVVDLVR.M                             |
| 260 - 268   | 1016.5060 | 1015.4987 | 1015.5848 | -85 | 1 K.GVVDLVRK.A                            |
| 267 - 280   | 1534.7026 | 1533.6953 | 1533.7861 | -59 | 1 R.MKATVWSGEELGAK.F Oxidation (M)        |
| 269 - 280   | 1259.6222 | 1258.6149 | 1258.6557 | -32 | 0 K.AIVWSGEELGAK.F                        |
| 403 - 416   | 1584.7714 | 1583.7641 | 1583.8018 | -24 | 0 K.IMSDPFVGSVSLTFVR.V Oxidation (M)      |
| 442 - 450   | 1086.5204 | 1085.5131 | 1085.5287 | -14 | 0 R.LLEMHANSR.E Oxidation (M)             |
| 469 - 487   | 2084.9898 | 2083.9825 | 2084.0273 | -22 | 0 K.DTITGETLSDPENPVVLER.M                 |
| 488 - 502   | 1698.7921 | 1697.7848 | 1697.9062 | -71 | 1 R.MDFPDPVIKVAIEPK.T                     |
| 505 - 516   | 1291.6075 | 1290.6002 | 1290.6853 | -66 | 1 K.ADIDKMATGLIK.L Oxidation (M)          |
| 517 - 528   | 1433.6833 | 1432.6760 | 1432.6735 | 2   | 0 K.LAQEDPSFHSR.D                         |
| 558 - 570   | 1416.7030 | 1415.6957 | 1415.7157 | -14 | 0 K.VEANVGAPQVNYR.E                       |
| 586 - 599   | 1463.6995 | 1462.6922 | 1462.7165 | -17 | 0 K.QSGGQGFADITVR.F                       |
| 623 - 630   | 952.4454  | 951.4382  | 951.4735  | -37 | 0 R.EYIPGVMK.G Oxidation (M)              |
| 687 - 693   | 889.4099  | 888.4026  | 888.4561  | -60 | 0 R.MLEPIMR.V                             |
| 687 - 693   | 921.4258  | 920.4185  | 920.4459  | -30 | 0 R.MLEPIMR.V 2 Oxidation (M)             |
| 694 - 713   | 2178.0981 | 2177.0908 | 2177.0964 | -3  | 0 R.VEVVTPEEHLGDVIGDLNSR.R                |

Spot No.: 20

Mascot score: 94 Sequence coverage %: 19

NCBI accession No.: gi| 77548468

Matched peptides No.: 24

Total peptides No.: 85

Calculated Mr: 115734

Calculated pI: 5.29

### Annotated PMF spectra:

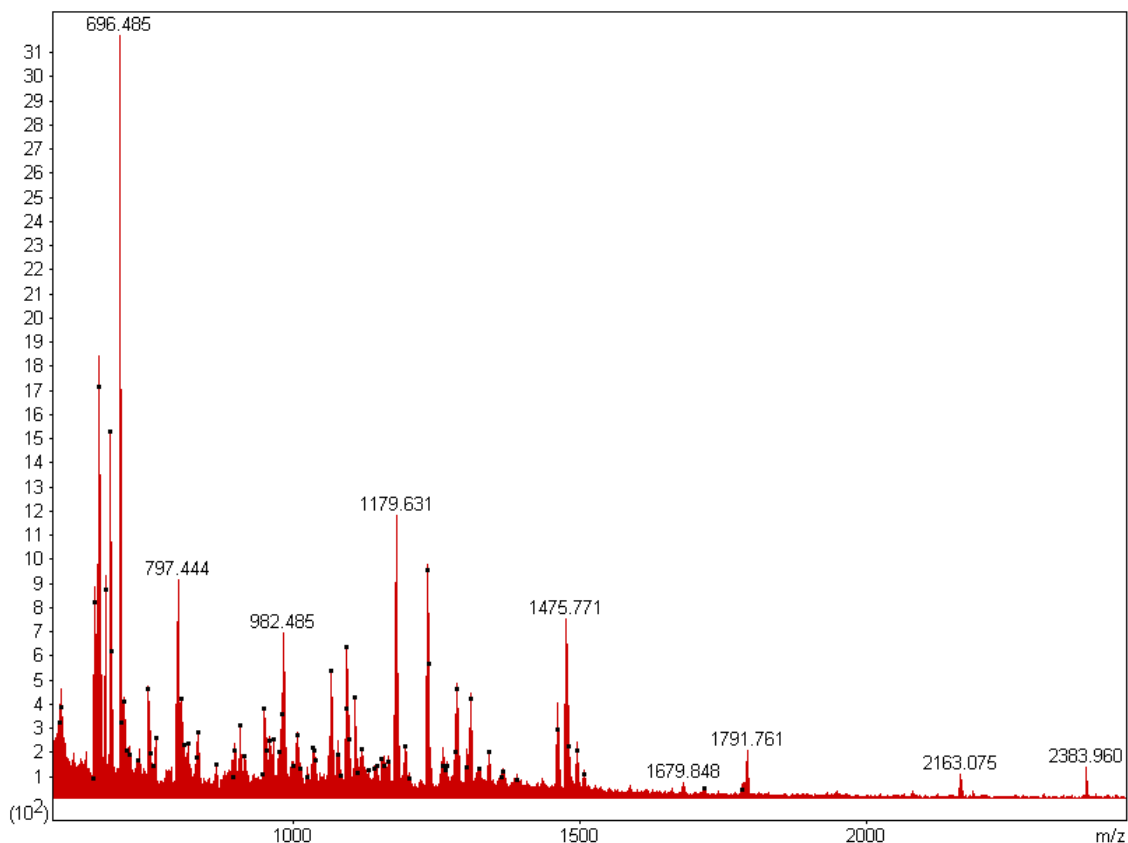

### Probability Based Mowse Score:

Protein score is  $-10 \cdot \log(P)$ , where P is the probability that the observed match is a random event. Protein scores greater than 72 are significant ( $p < 0.05$ ).

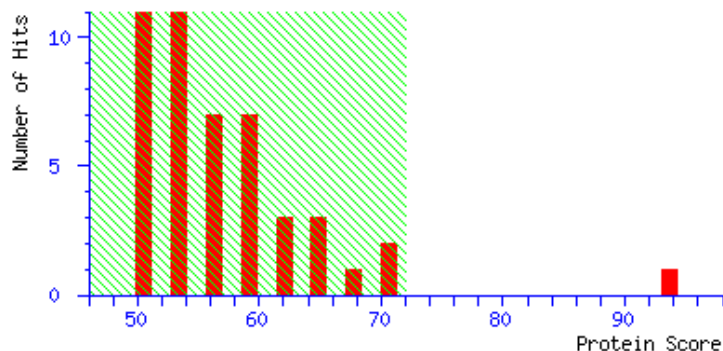



## Matched peptide sequences: shown in **Bold Red**

```

1 MARGSALLDG SVLPPSRIVS ERQAGLPRRF MPESATGREI VTLGEGRPAP
51 DYPGRSVFFL PFAMAGLVPP FSSFFMDVLE FYDLQMayLT PNAVMTLAI F
101 AHLCEMFIGV RPSLRLFRWF FTVQSVSPPS VVGGCYFQPR GPVANRYIPC
151 TLRKKWDDWK SDWFYTPLAD EARLRLPSQP PVQASSWRAP VDLGDGYDAV
201 LDRLAGLRSQ GLTGAMVYGD YLRRRIAPLQ RRARGAWeyT GSEDFMRTHQ
251 GVRWDWAPED FKILVQRVLN LNSVEAALIP QGILPLCSDP DRASILTImm
301 AVGASEERAP KGHdGAGGSr RGEQSTPRGG HASGSrDSGP GSSRPANARG
351 KRKQGGTPPP SPPRGDGAAR ASSRRPEGAA PASQPEGERK KKRPRKMGET
401 EPSRGNLISP PKWSFNRPPr SEIPSRPSRH SKSGQSETED PAAAEARRRE
451 SDRREAADRL REAEAAQEA ARARQAEeIA REEAARACQA EEAVREEAPR
501 ARQAEAAARE EAGFRQDEVm ATSEASrDEA AGASLGPTPS GDAQATTSGA
551 AGDEAAGASL GPTPSGDAQD QPGPRDIPES GTSIGGPSRV ASSPRLFP T
601 PSIAPLNTEP LLQALAAANT TMLDGLSAQV EALQAERAEL DAAWTRVEEG
651 RRSVEAMVEV GRKAHRRHVS ELETRKKVLA EIAKEVEEER EAALIATTVM
701 NEAQDTLRLQ YGNWEAELGK KLDAAQGVLD AAAAREQRAA ETEATSRRRE
751 EAEARAMAL EERACVVERD LADREAAVTI REATLAAHEA ACAEEEF TLR
801 LREDALTERE RALEGAEAAA QQLADSLSLR EAAQEEQVRR NLEGARAERA
851 ALNQRAAELE ARAKELDARA RSGGAAAGES DLAARLAAAE RTIADLQGT L
901 DSSAGEVEAL RLAGEVGPgM LWDAVSRLDC AGRQVGLWRG RTVKYAAANQ G
951 GLAQRLSKMA GALQRLHEEL EKTIKSSSRD LAQGAVELVL ASYQARDPNF
1001 SPWMALDEFP PGTEDHARAQ VRDTADHIVD SFEGSAPRLA FAPNSDEEGN
1051 AGGDANSDEE AGDPGASD

```

## Matched peptides information:

| Start - End | Observed  | Mr(expt)  | Mr(calc)  | ppm | Miss | Sequence                                   |
|-------------|-----------|-----------|-----------|-----|------|--------------------------------------------|
| 23 - 29     | 797.4439  | 796.4366  | 796.4668  | -38 | 1    | R.QAGLPRR.F                                |
| 30 - 38     | 1011.5292 | 1010.5219 | 1010.4491 | 72  | 0    | R.FMPESATGR.E Oxidation (M)                |
| 156 - 160   | 749.4171  | 748.4098  | 748.3180  | 123 | 0    | K.WDDWK.S                                  |
| 233 - 247   | 1791.7611 | 1790.7538 | 1790.7682 | -8  | 1    | R.ARGAWeyT <b>GSEDFMR</b> .T Oxidation (M) |
| 329 - 336   | 728.4276  | 727.4203  | 727.3362  | 116 | 0    | R.GGHASGSr.D                               |
| 354 - 364   | 1090.5673 | 1089.5600 | 1089.5567 | 3   | 0    | K.QGGTPPPSPPr.G                            |
| 375 - 390   | 1679.8476 | 1678.8403 | 1678.8387 | 1   | 1    | R.RPEGAA <b>PASQPEGERK</b> .K              |
| 397 - 404   | 906.5207  | 905.5134  | 905.3913  | 135 | 0    | K.MGETEPSR.G                               |
| 487 - 495   | 1033.5632 | 1032.5559 | 1032.4658 | 87  | 0    | R.ACQAE <b>EA</b> VR.E                     |
| 510 - 515   | 708.4296  | 707.4224  | 707.3238  | 139 | 0    | R.EEAGFR.Q                                 |
| 516 - 527   | 1339.6544 | 1338.6471 | 1338.5721 | 56  | 0    | R.QDEV <b>MA</b> TSEASr.D Oxidation (M)    |
| 647 - 652   | 745.4738  | 744.4666  | 744.3878  | 106 | 1    | R.VEEGRR.S                                 |
| 652 - 662   | 1232.6238 | 1231.6165 | 1231.6343 | -14 | 1    | R.RSVEAMVEVGR.K                            |
| 653 - 662   | 1092.5457 | 1091.5384 | 1091.5281 | 9   | 0    | R.SVEAMVEVGR.K Oxidation (M)               |
| 749 - 756   | 973.5469  | 972.5396  | 972.4988  | 42  | 1    | R.REEALEAR.A                               |
| 803 - 811   | 1118.5637 | 1117.5564 | 1117.5363 | 18  | 1    | R.EDALTERER.A                              |
| 840 - 846   | 815.5047  | 814.4974  | 814.4409  | 69  | 1    | R.RNLEGAR.A                                |
| 841 - 846   | 659.4496  | 658.4423  | 658.3398  | 156 | 0    | R.NLEGAR.A                                 |
| 856 - 864   | 958.5125  | 957.5052  | 957.5243  | -20 | 1    | R.AAELEARAK.E                              |
| 863 - 869   | 802.5005  | 801.4933  | 801.4344  | 73  | 1    | R.AKELDAR.A                                |
| 870 - 885   | 1459.7770 | 1458.7697 | 1458.7175 | 36  | 1    | R.ARSGGAAAGESDLAAR.L                       |
| 934 - 939   | 758.4809  | 757.4736  | 757.4235  | 66  | 0    | R.QVGLWR.G                                 |
| 966 - 972   | 897.4865  | 896.4792  | 896.4603  | 21  | 0    | R.LHEELEK.T                                |
| 1023 - 1038 | 1716.8061 | 1715.7988 | 1715.7751 | 14  | 0    | R.DTADHIVDSFEGSAPR.L                       |

Spot No.: **21**

Mascot score: **90**

Sequence coverage %: **23**

NCBI accession No.: **gi| 303276186**

Matched peptides No.: **44**

Total peptides No.: **126**

Calculated Mr: **188682**

Calculated pI: **6.11**

### Annotated PMF spectra:

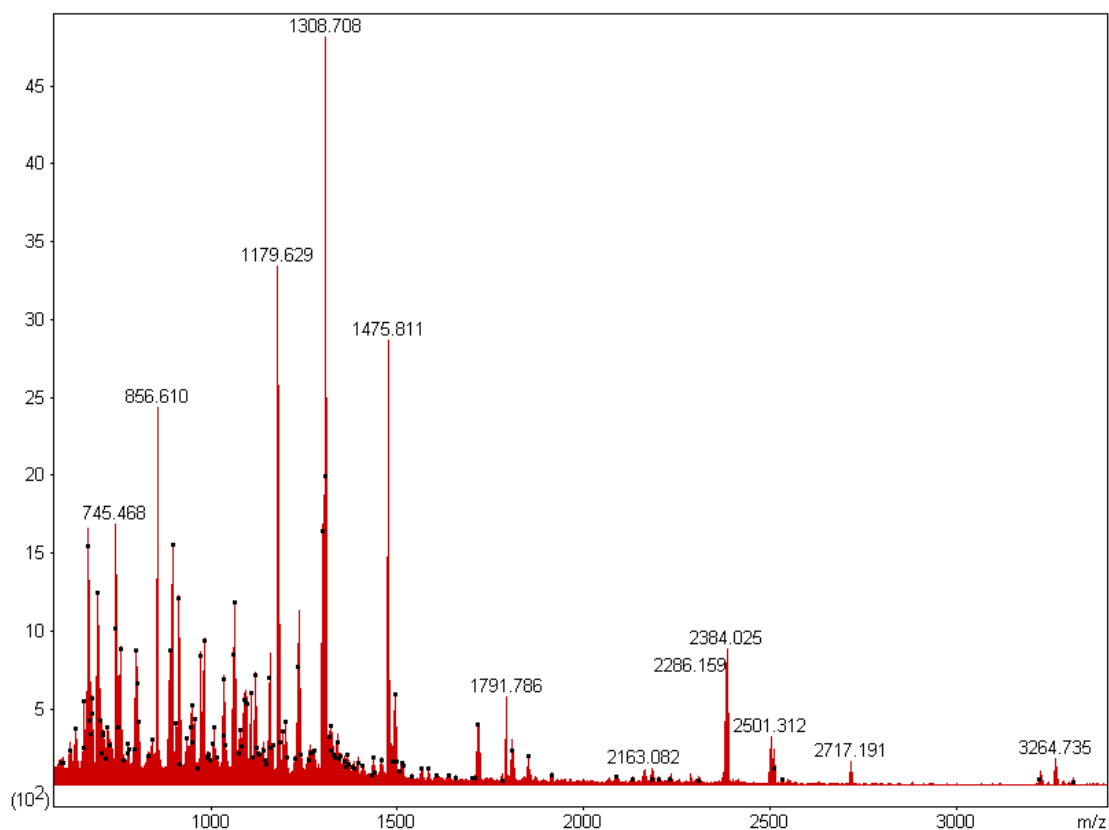

### Probability Based Mowse Score:

Protein score is  $-10 \cdot \log(P)$ , where P is the probability that the observed match is a random event. Protein scores greater than 72 are significant ( $p < 0.05$ ).

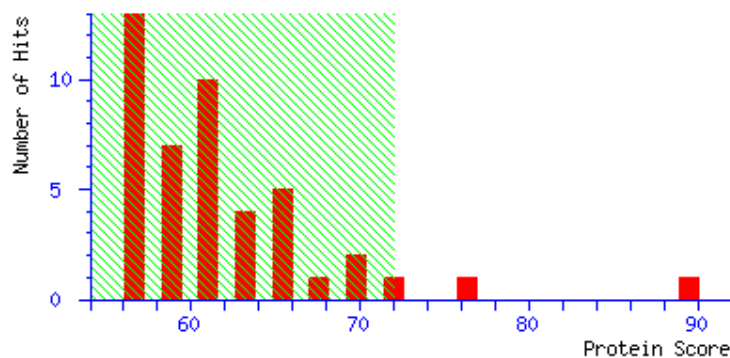

## Matched peptide sequences: shown in **Bold Red**

```

1  MPVSKERTVP  ITSWANAEE  VSERLRRSER  EFFVPKIPEL  ARERSRSAPE
51  TAAPRSPARE  TSTSTSGGAR  ERSPDHLLTK  RRGNPFQGF  AIDVHALLDK
101  LPKPGRRAPP  SPARRPASEN  DATSSSENSHS  SPSPAKENAL  VAAGLATPPP
151  TKTPDADAML  ASSPDADAML  ASSPAPTWTF  KHLDSANKLN  AELHAKLVRE
201  QEKAREAIKN  LKREHDARLN  KERGERKEEV  RRMNEQHEAR  AKKREEEASR
251  EREKREDERE  RARERDADDL  KRLNERLEEK  ATRLGEEMRR  LCDEHEARLK
301  KHDDERKAER  ENVRRLKAEH  DAARKADKAV  AEGKYAEYEK  AVALGKLEME
351  DLARQLEKDR  RELRTERGEF  KIRVRRFQED  HDLMESELDE  TQTNAQMMLR
401  EAQAEIIALK  NTAQRIEAEW  EVTKLEQAAV  AAEKEKERAR  QKVELRFKTV
451  WMSALRASFV  RWKSESRRIK  NGRAIEEERK  LLISNAAKAE  KALEEESARG
501  AAMLEAAREE  AKREREAACL  QREETLAAAK  KDLNDAEAAK  KAAIKKMEDA
551  LKAQTEATIR  AQNQLEEAEL  NQAAAAARAAS  VAALGRLEQR  AALRFRTVLM
601  SLLRSSFTRW  KNETSLSRVE  RVERAEMLEH  KAAKERAEQA  LEDARASQEK
651  MIEGMKAKHE  ESDVAIKTEH  SRAVETIKAE  HSEAVSKLED  ALRKSNEEIS
701  ELARAAAVQA  LAQNAAAQKV  EVAARERAAQ  TATLRFRTVL  MGSLRSSFVR
751  WKYVAKYQKM  ERTEQSERLA  LVKEKEKAEN  ELAEARKANQ  ETVAAMRSQ
801  AETLQIIEDA  KQSIAKQVQE  KQDSTIKKLE  EALEKQTNAT  LRAQKQFDDA
851  ELARAAAVQA  AKIAATERAL  QKAALRFKTV  MMGSLRASFQ  RWKYAAKFMR
901  RDREADAERE  TLLASTRKAG  RELEDARRAQ  EDAVASLREK  QRKEKQRLLE
951  QHAAAEEQKA  STYAEQLAAI  KREAAAALAS  AREEELDSTA  DIERRVKTAV
1001 DQTKLELGS  VDLRAQLAS  LEIKLTASRK  SFEMASHRNA  TLEDEVDAN
1051 RKADEAQKY  QGARAAAAFM  EADADEMKQV  LDQVNEAHAL  ALEDERRKLA
1101 RAEAMNLAGD  EEMRKEINRL  HSELEEQKLL  VAAASKATKD  AMAAAAAKAA
1151 BAAKAESEAA  RARESMLLSD  AASSAEMAKT  NAAMSDRESL  AKECEQLRLE
1201 LAAARQAAAL  VANSPASEER  KRTSARKASP  SPAPAGSASS  SKKKSARQRG
1251 TITVDEHEEA  IALLRGEIQV  LVSRLGDVVK  NDEVTDEDVA  RARSKAAKDL
1301 DLAIQLTDEW  EEPRTPRGA  NDDDGSESGS  ESDDDHVETV  VKLNNRCKTL
1351 VVKGKAALAR  IVALEVELAS  AVNEKESATA  WALACTRRAR  GAEEAAMFAK
1401 DEARDLKLRT  RDIRLGKRST  EAEDVDPIAA  KAAIERLEVE  LSEARDAAAA
1451 SATTIAEIAR  ERDVLKRELV  GYERRKKAGG  DFDELISGSN  VIERLGMPTV
1501 KAKEPEPEE  EEEEEGFFAW  LITPSRQPDV  EEKAKKKEED  DEPGFFRTLF
1551 GLTPSKDAAG  EGGARPAASE  KSDSSASRSD  AFATAAPRFR  SGASVTSGDD
1601 AATRNLANTP  PSIPKLDLSR  VSRSPGEERD  RGGREGARSD  ADADAESDAE
1651 SDAASGDARR  VAGEASESDA  RSRSGPGGFW  KRVAGDDADF  SDSDSVEVS
1701 GQL

```

## Matched peptides information:

| Start - End | Observed  | Mr (expt) | Mr (calc) | ppm  | Miss | Sequence                      |
|-------------|-----------|-----------|-----------|------|------|-------------------------------|
| 31 - 36     | 716.4218  | 715.4146  | 715.3905  | 34   | 0    | R.EFFVPK.I                    |
| 214 - 221   | 982.4828  | 981.4756  | 981.4992  | -24  | 1    | R.EHDARLNK.E                  |
| 284 - 290   | 906.5101  | 905.5028  | 905.4389  | 71   | 1    | R.LGEEMRR.L Oxidation (M)     |
| 311 - 315   | 673.4170  | 672.4097  | 672.3667  | 64   | 1    | R.ENVRRL.L                    |
| 318 - 325   | 897.4651  | 896.4578  | 896.4464  | 13   | 1    | K.AEHDAARK.A                  |
| 329 - 340   | 1357.7302 | 1356.7229 | 1356.6561 | 49   | 1    | K.AVAEGKYAEYEK.A              |
| 368 - 373   | 749.4233  | 748.4160  | 748.4232  | -10  | 1    | R.GEFKIR.V                    |
| 449 - 456   | 963.5118  | 962.5046  | 962.5008  | 4    | 0    | K.TVWMSALR.A                  |
| 471 - 479   | 1073.5913 | 1072.5840 | 1072.5261 | 54   | 1    | K.NGRAIEEER.K                 |
| 481 - 491   | 1157.6070 | 1156.5997 | 1156.6815 | -71  | 1    | K.LLISNAAKAEK.A               |
| 514 - 519   | 703.4229  | 702.4156  | 702.3660  | 71   | 1    | R.EREAAK.L                    |
| 523 - 530   | 832.4981  | 831.4908  | 831.4338  | 69   | 0    | R.EETLAAAK.K                  |
| 597 - 604   | 948.4841  | 947.4768  | 947.5474  | -75  | 0    | R.TVLMSELLR.S Oxidation (M)   |
| 705 - 718   | 1493.7899 | 1492.7826 | 1492.7997 | -11  | 1    | K.HLEBAKLAQNAAAQK.K           |
| 711 - 719   | 914.5887  | 913.5814  | 913.5345  | 51   | 1    | K.LAQNAAAQK.V                 |
| 736 - 745   | 1179.6290 | 1178.6217 | 1178.6594 | -32  | 1    | R.FRTVLMGSLR.S                |
| 751 - 756   | 794.4409  | 793.4336  | 793.4486  | -19  | 1    | R.WKYVAK.Y                    |
| 760 - 768   | 1165.5966 | 1164.5893 | 1164.5193 | 60   | 1    | K.MERTEQSER.L                 |
| 763 - 773   | 1273.5843 | 1272.5770 | 1272.7037 | -100 | 1    | R.TEQSERLALVK.E               |
| 787 - 797   | 1234.6530 | 1233.6457 | 1233.6135 | 26   | 1    | R.KANQETVAAMR.S Oxidation (M) |
| 788 - 797   | 1090.5468 | 1089.5395 | 1089.5237 | 15   | 0    | K.ANQETVAAMR.S                |
| 877 - 886   | 1201.6739 | 1200.6666 | 1200.5995 | 56   | 1    | R.FKTVMGSLR.A 2 Oxidation (M) |
| 910 - 917   | 890.5379  | 889.5306  | 889.4869  | 49   | 0    | R.ETLLASTR.K                  |
| 929 - 940   | 1316.6045 | 1315.5972 | 1315.6732 | -58  | 1    | R.AQEDAVASLREK.Q              |
| 960 - 971   | 1265.6403 | 1264.6330 | 1264.6663 | -26  | 0    | K.ASTYAEQLAAIK.R              |
| 996 - 1004  | 989.5314  | 988.5242  | 988.5553  | -32  | 1    | R.VKTAVDQTK.L                 |
| 1030 - 1038 | 1092.5408 | 1091.5335 | 1091.5182 | 14   | 1    | R.KSFEMASHR.N                 |
| 1053 - 1064 | 1307.7098 | 1306.7025 | 1306.6265 | 58   | 1    | K.ADEAQKAYQGAR.A              |
| 1102 - 1115 | 1564.8130 | 1563.8057 | 1563.7021 | 66   | 1    | R.AEAMNLAGDEMREK.E            |
| 1115 - 1119 | 659.4427  | 658.4355  | 658.3762  | 90   | 1    | R.KEINR.L                     |
| 1140 - 1154 | 1360.6431 | 1359.6358 | 1359.6816 | -34  | 1    | K.DAMAAAAAKAAEAAK.A           |
| 1180 - 1192 | 1393.7381 | 1392.7308 | 1392.6667 | 46   | 1    | K.TNAAMSDRESLAK.E             |
| 1206 - 1220 | 1513.7750 | 1512.7677 | 1512.7532 | 10   | 0    | R.QAAALVANSPASEER.K           |
| 1281 - 1291 | 1262.6266 | 1261.6193 | 1261.5422 | 61   | 0    | K.NDEVTDEDVAR.A               |
| 1349 - 1355 | 744.4426  | 743.4354  | 743.4905  | -74  | 1    | K.TLVVKGK.A                   |
| 1361 - 1375 | 1584.7789 | 1583.7716 | 1583.8770 | -67  | 0    | R.IVALEVELASAVNEK.E           |
| 1419 - 1431 | 1345.6967 | 1344.6894 | 1344.6409 | 36   | 0    | R.STEAEDVDPIAAK.A             |
| 1446 - 1462 | 1716.8880 | 1715.8807 | 1715.8802 | 0    | 1    | R.DAAAASATTIABIARER.D         |
| 1495 - 1501 | 745.4681  | 744.4608  | 744.4204  | 54   | 0    | R.LGMPVK.A                    |
| 1579 - 1588 | 1006.4987 | 1005.4914 | 1005.4879 | 3    | 0    | R.SDAFATAAPR.F                |
| 1616 - 1620 | 603.3909  | 602.3836  | 602.3388  | 74   | 0    | K.LDLSR.V                     |
| 1616 - 1623 | 945.5085  | 944.5012  | 944.5403  | -41  | 1    | K.LDLSRVS.R                   |
| 1621 - 1629 | 1016.5577 | 1015.5504 | 1015.5047 | 45   | 1    | R.VSRSPGEER.D                 |
| 1672 - 1681 | 1078.5872 | 1077.5799 | 1077.5356 | 41   | 1    | R.SRSGPGGFWK.R                |

Spot No.: **22**

Mascot score: **90**

Sequence coverage %: **25**

NCBI accession No.: **gi| 294460288**

Matched peptides No.: **12**

Total peptides No.: **71**

Calculated Mr: **52848**

Calculated pI: **5.97**

### Annotated PMF spectra:

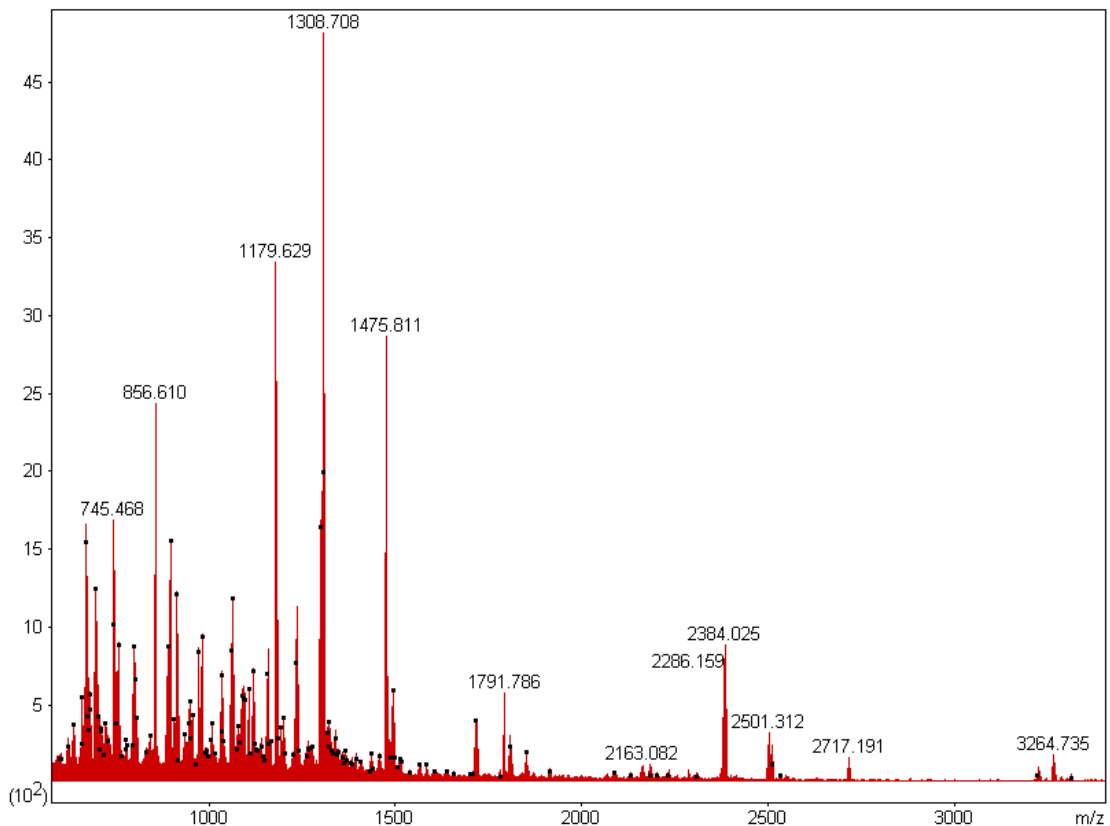

### Probability Based Mowse Score:

Protein score is  $-10 \cdot \log(P)$ , where P is the probability that the observed match is a random event. Protein scores greater than 72 are significant ( $p < 0.05$ ).

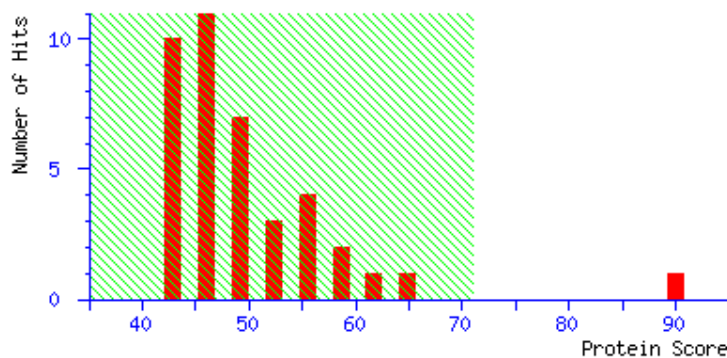

## Matched peptide sequences: shown in **Bold Red**

```

1  MSSSALPSSS DDGDARSHAK PNSTPPTKSS AASSDSEPKT PRRSSVMKKS
51 RDGSRPDTRV GPKQSRDRLE AKLPASKKKK NSRKTGVSGN KSQIDIEELL
101 AQTYPKEPSV LGDETHITNG LEMPSEHAKD TAKKWSAEDE ISLANAVLAS
151 SAGGQVNMTA FYERAKETLQ SESHGQIYEK MRRMRSRFWT IESQLRDAKI
201 AEDFFPYRSM HEAELYKVWK QIWGRHERRN EAAQDIEMEQ NRELRSRSHA
251 RQVHNGDVNE DRHESRTEAA HMNGEPRSHS HAMQRQNGEV TDDPPEEEEE
301 EEEHQAAEEE DNVVETAGKT PSRVACNHDE EFNLIQTEIK ALVCKVKNNV
351 QTMLDDTEAK MEGLIDSLFK RAVVAAQVQS LGSEVGIGSC LCSSLSRRMK
401 ELECVRVRE FRGLNEAAEK ILQQKWRKHQ IEELRTFSGR LELLQEECKL
451 CIKDLETANS SHNS

```

## Matched peptides information:

| Start - End | Observed  | Mr (expt) | Mr (calc) | ppm | Miss | Sequence                              |
|-------------|-----------|-----------|-----------|-----|------|---------------------------------------|
| 29 - 39     | 1065.5701 | 1064.5628 | 1064.4622 | 95  | 0    | K.SSAASSDSEPK.T                       |
| 44 - 49     | 679.4951  | 678.4878  | 678.3734  | 169 | 1    | R.SSVMKK.S                            |
| 188 - 196   | 1179.6518 | 1178.6445 | 1178.6084 | 31  | 0    | R.FWTIESQLR.D                         |
| 188 - 199   | 1493.8081 | 1492.8008 | 1492.7674 | 22  | 1    | R.FWTIESQLRDAK.I                      |
| 200 - 208   | 1157.6412 | 1156.6339 | 1156.5553 | 68  | 0    | K.IAEDFFPYR.S                         |
| 209 - 217   | 1107.5964 | 1106.5891 | 1106.5066 | 75  | 0    | R.SMHEAELYK.V                         |
| 221 - 225   | 659.4705  | 658.4632  | 658.3551  | 164 | 0    | K.QIWGR.H                             |
| 252 - 266   | 1791.8549 | 1790.8476 | 1790.8044 | 24  | 1    | R.QVHNGDVNEDRHESR.T                   |
| 263 - 277   | 1737.8921 | 1736.8848 | 1736.7648 | 69  | 1    | R.HESRTEAAHMNGEPR.S Oxidation (M)     |
| 267 - 285   | 2163.1430 | 2162.1357 | 2161.9494 | 86  | 1    | R.TEAAHMNGEPRSHSHAMQR.Q Oxidation (M) |
| 320 - 340   | 2501.3457 | 2500.3384 | 2500.2016 | 55  | 1    | K.TPSRVACNHDEEFNLIQTEIK.A             |
| 361 - 371   | 1308.7160 | 1307.7087 | 1307.6907 | 14  | 1    | K.MEGLIDSLFKR.A                       |

Spot No.: 23

Mascot score: 81    Sequence coverage %: 34

NCBI accession No.: gi| 125575959

Matched peptides No.: 12

Total peptides No.: 111

Calculated Mr: 29568

Calculated pI: 5.53

### Annotated PMF spectra:

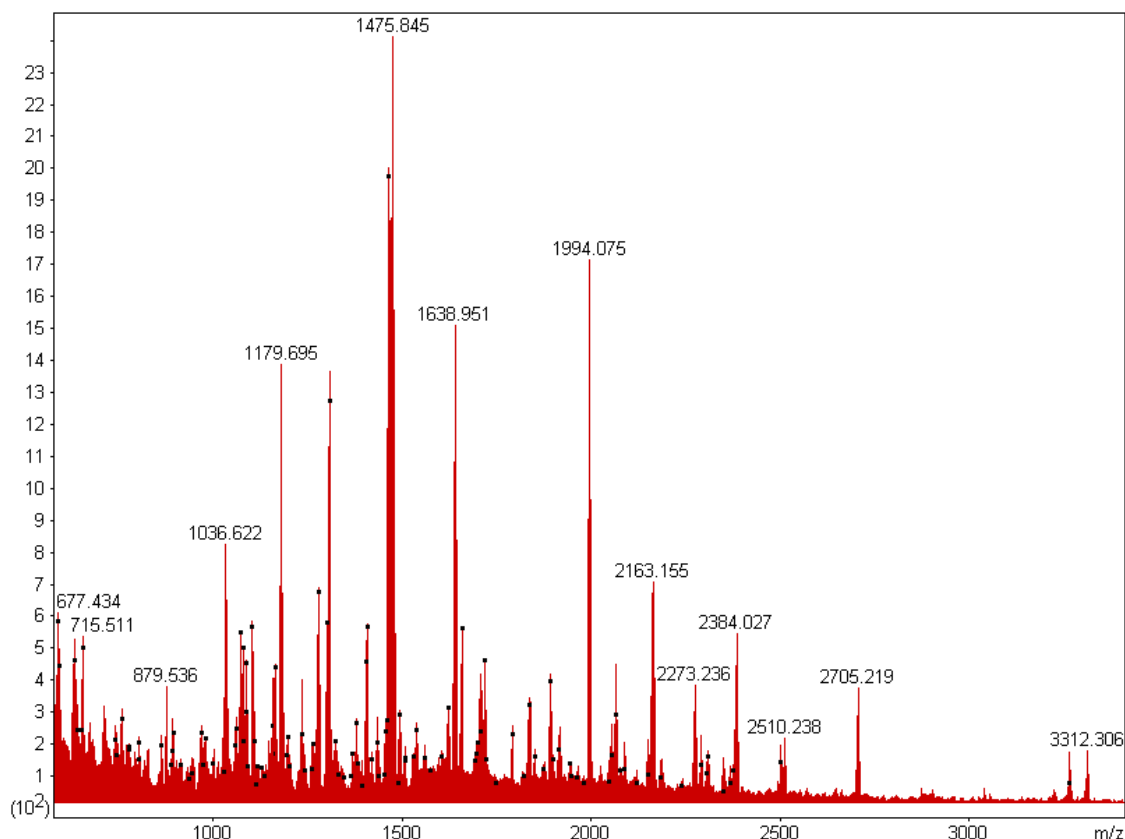

### Probability Based Mowse Score:

Protein score is  $-10 \cdot \log(P)$ , where P is the probability that the observed match is a random event. Protein scores greater than 72 are significant ( $p < 0.05$ ).

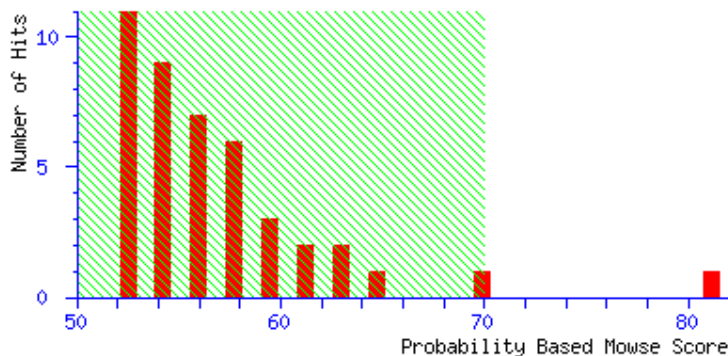

Matched peptide sequences: shown in **Bold Red**

**1 M**ASMYRLPRN **A**ICAACYEGA **K**AIIAFFNDD DDEHADADQG SVKPSRLTKL  
**51** NSTIKGLRDA **W**EEVKQMR**C**R **E**EETKQRAS**F** LQEGFAAAWK DGIHTDIAIR  
**101** PGTGPPIQAH **K**AILATRSE**V** **F**RHILAGDD**D** CKAPAGDSLS LPELTHDELS  
**151** HLLAFLYTGS LATCAEER**H**L **H**ALLVAGD**K**Y **D**VPFLRR**A**C**E** **A**RLAAGVEAG  
**201** NVLR**T**LEVA**E** **L**SSSA**A**LKER AMGTVVEHAE EVVFSPEYEE FAVRNAALCV  
**251** QITR**T**LL**A**NK SLPK**T**P

Matched peptides information:

| Start - End | Observed  | Mr(expt)  | Mr(calc)  | ppm  | Miss Sequence                  |
|-------------|-----------|-----------|-----------|------|--------------------------------|
| 1 - 9       | 1140.6369 | 1139.6296 | 1139.5579 | 63   | 1 -.MASMYRLPR.N Oxidation (M)  |
| 7 - 21      | 1693.9448 | 1692.9375 | 1692.8076 | 77   | 1 R.LPRNAICAACYEGAK.A          |
| 59 - 68     | 1307.7733 | 1306.7660 | 1306.5976 | 129  | 1 R.DAWEEVKQMR.C Oxidation (M) |
| 71 - 77     | 919.5537  | 918.5464  | 918.4406  | 115  | 1 R.EEETKQR.A                  |
| 112 - 117   | 644.3303  | 643.3231  | 643.4017  | -122 | 0 K.AILATR.S                   |
| 112 - 122   | 1262.7219 | 1261.7146 | 1261.7142 | 0    | 1 K.AILATRSEVFR.H              |
| 118 - 122   | 637.4024  | 636.3951  | 636.3231  | 113  | 0 R.SEVFR.H                    |
| 169 - 186   | 2064.2133 | 2063.2060 | 2063.1316 | 36   | 1 R.HLHALLVAGDKYDVPFLR.R       |
| 180 - 187   | 1065.6273 | 1064.6200 | 1064.5767 | 41   | 1 K.YDVPFLRR.A                 |
| 187 - 192   | 762.4623  | 761.4550  | 761.3602  | 124  | 1 R.RACEAR.L                   |
| 205 - 218   | 1418.7674 | 1417.7601 | 1417.7664 | -4   | 0 R.TLEVAELSSSAALK.E           |
| 255 - 260   | 659.4620  | 658.4548  | 658.4014  | 81   | 0 R.TLLANK.S                   |

Spot No.: 24

Mascot score: 82 Sequence coverage %: 26

NCBI accession No.: gi| 168036931

Matched peptides No.: 17

Total peptides No.: 116

Calculated Mr: 49474

Calculated pI: 9.31

### Annotated PMF spectra:

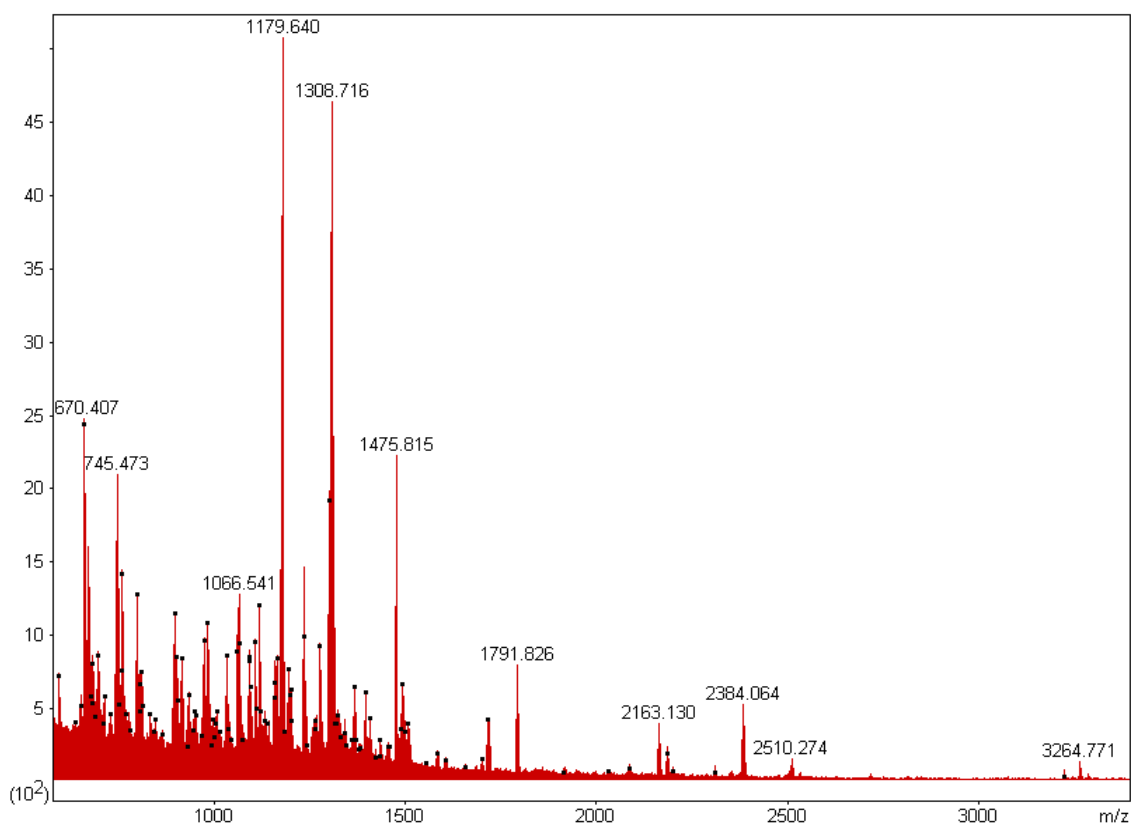

### Probability Based Mowse Score:

Protein score is  $-10 \cdot \log(P)$ , where P is the probability that the observed match is a random event. Protein scores greater than 72 are significant ( $p < 0.05$ ).

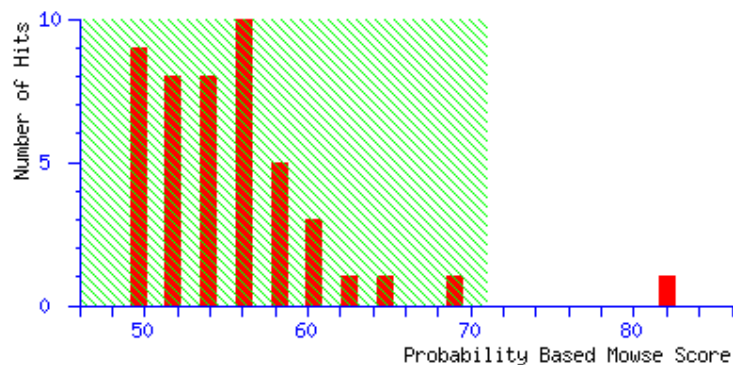



## Matched peptide sequences: shown in **Bold Red**

**1** **MLSFQ****MDQT** **VSHGQKSISH** **CIRNGVTPGS** **LKPVACRSNS** HPSQGIGLLF  
**51** DDAEFFAGF VRL**LWEAWKAI** **DKLTDERIKE** **RNEQNGEAMV** **ERVLILLSGT**  
**101** GPFLYPSGTL TWGLAP**RCS** **VWFPRHGLE** **SRS**GPAA**DRY** **SAWRRI****LQGC**  
**151** **LWR**ALLFFHR SSSVARM**LLI** APP**PF**CVD**AV** EASGGQ**LQT** SPDRLLGLPS  
**201** PTAPVLESSE QMCMHILL**LL** LVRSQQIT**LT** GTICERS**LQL** QDAVP**GRGAR**  
**251** **CHCSSR**TRLA FR**S**SEELE**TL** RLSQKAV**LLA** VFDLPPILRV LVNGNAEQEN  
**301** ISRSKNIYIS AALSDWT**VD**T EVRALS**GHLE** PTCIS**V**ERR**V** **VRC**DAMR**CHA**  
**351** HLHPSPPP**QL** NSIQFFS**FLF** HLIYQGR**NRC** **SGR**SF**W**NP**RR** HHC**V**ESALND  
**401** SAPRGDLCSE SRPTGRGSKC VSTLRQRAQ**F** V**V**FQ

## Matched peptides information:

| Start - End | Observed  | Mr(expt)  | Mr(calc)  | ppm  | Miss | Sequence                          |
|-------------|-----------|-----------|-----------|------|------|-----------------------------------|
| 1 - 6       | 797.4214  | 796.4141  | 796.3902  | 30   | 0    | -. <b>MLSFQR</b> .M Oxidation (M) |
| 2 - 6       | 650.2355  | 649.2282  | 649.3548  | -195 | 0    | <b>M.LSFQR</b> .M                 |
| 7 - 16      | 1130.5669 | 1129.5596 | 1129.5186 | 36   | 0    | <b>R.MDQTVSHGQK</b> .S            |
| 17 - 37     | 2309.1566 | 2308.1493 | 2308.1892 | -17  | 1    | <b>K.SISHCIRNGVTPGSLKPVACR</b> .S |
| 24 - 37     | 1455.7398 | 1454.7325 | 1454.7664 | -23  | 0    | <b>R.NGVTPGSLKPVACR</b> .S        |
| 63 - 68     | 832.5130  | 831.5057  | 831.4279  | 94   | 0    | <b>R.LWEAWK</b> .A                |
| 69 - 77     | 1060.5948 | 1059.5875 | 1059.5560 | 30   | 1    | <b>K.AIDKLTDER</b> .I             |
| 82 - 92     | 1276.6119 | 1275.6046 | 1275.5513 | 42   | 0    | <b>R.NEQNGEAMVER</b> .V           |
| 118 - 125   | 1107.5692 | 1106.5619 | 1106.5444 | 16   | 1    | <b>R.RCSVWFPR</b> .H              |
| 119 - 125   | 951.5154  | 950.5082  | 950.4433  | 68   | 0    | <b>R.CSVWFPR</b> .H               |
| 126 - 132   | 811.4518  | 810.4446  | 810.4348  | 12   | 0    | <b>R.HGLESR</b> .S                |
| 140 - 144   | 682.4003  | 681.3931  | 681.3234  | 102  | 0    | <b>R.YSAWR</b> .R                 |
| 145 - 153   | 1201.6639 | 1200.6566 | 1200.6550 | 1    | 1    | <b>R.RILQGCLWR</b> .A             |
| 146 - 153   | 1045.5343 | 1044.5270 | 1044.5539 | -26  | 0    | <b>R.ILQGCLWR</b> .A              |
| 248 - 256   | 1090.5693 | 1089.5620 | 1089.4556 | 98   | 1    | <b>R.GARCHCSSR</b> .T             |
| 340 - 347   | 1006.4984 | 1005.4911 | 1005.4848 | 6    | 1    | <b>R.VVRC</b> DAMR.C              |
| 378 - 383   | 749.4279  | 748.4206  | 748.3398  | 108  | 1    | <b>R.NRCSGR</b> .S                |

Spot No.: **25**

Mascot score: **96**    Sequence coverage %: **26**

NCBI accession No.: **gi| 168037847**

Matched peptides No.: **20**

Total peptides No.: **53**

Calculated Mr: **70593**

Calculated pI: **9.86**

### Annotated PMF spectra:

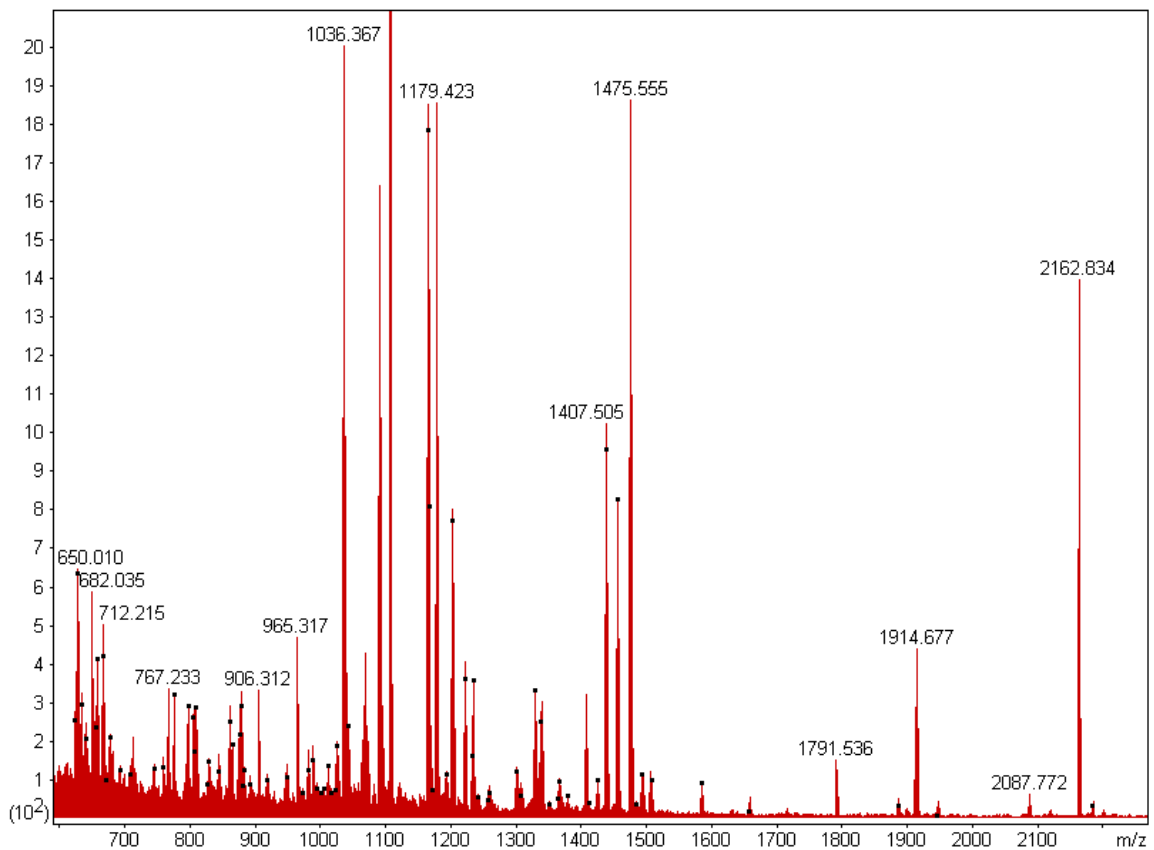

### Probability Based Mowse Score:

Protein score is  $-10 \cdot \log(P)$ , where P is the probability that the observed match is a random event. Protein scores greater than 72 are significant ( $p < 0.05$ ).

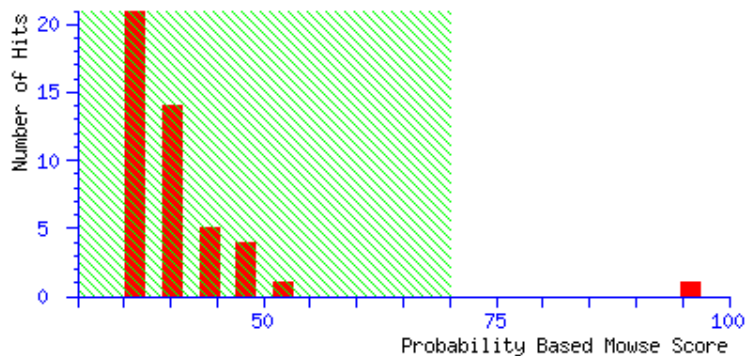

Matched peptide sequences: shown in **Bold Red**

1 MGVMFLCPV **VKLEHTLSKM** KHSPNAEQLR GAENVKGRMLN RTSR**SLQAAN**  
 51 **MI**IARNPNPM GLSDMLDSTS DNLNGQMGNS SGLLGMMVK**Q** **GH**ETTR**E**FKL  
 101 AECLKELASF QR**SVLEDPQE** **DYPMQPK**DLN TLFSAGIIQS KRVENADALS  
 151 AEAKGTVSED LGKAGCNVGA VKSTRRREVK AIQKQPWSFS TKTSVRQLKG  
 201 DAGVGKIERL IRMSKKSPVV GAKSR**QYVIH** **SNPLATGR**RRL STASSKRR**DS**  
 251 **LELSPTK**CKR MSNSPTLKP**K** SAEKK**KYGF**G **IQAANAGHR**K TCSNKEQMPT  
 301 LKGGKAENKA LKHTDRQKVI LK**RVMSSPVN** **GKKKVLRETA** SGLMSSVDLS  
 351 AAARRAR**RLS** **QVLRSEHELK** HHNQYAKE**A** **QQLRQQLAIK** EDEADRAQSA  
 401 SMLLRQICAN QAAELKSYKE AVPILMKELS EVREKYFKQE DDLQFELNAK  
 451 LGFQTEVSNL RDCVESL**TND** IQQTR**TVNTA** **LAKRVHQY**EK SVCTSCRL**YI**  
 501 NQKPMKK**EMS** **PMP**SKTKAGH PLKTPIRLRS DSNLGR**WNSP** **RA**AL**TSMKEM**  
 551 ENSWQLENQK **L**PFK**STGDVN** **Q**NPLK**DLEQH** DFALQARCEN VSQGLSNS**DC**  
 601 PPVDAL**KNRI** **S**LL**LFTASQA** **L**EN**QHR**AM

Matched peptides information:

| Start - End | Observed  | Mr(expt)  | Mr(calc)  | ppm  | Miss | Sequence                                 |
|-------------|-----------|-----------|-----------|------|------|------------------------------------------|
| 13 - 19     | 827.2610  | 826.2537  | 826.4548  | -243 | 0    | <b>K.LEHTLSK.M</b>                       |
| 45 - 55     | 1203.4329 | 1202.4256 | 1202.6441 | -182 | 0    | <b>R.SLQAANMIAR.N</b> Oxidation (M)      |
| 90 - 96     | 805.2733  | 804.2660  | 804.3726  | -133 | 0    | <b>K.QGNETTR.E</b>                       |
| 113 - 127   | 1791.5361 | 1790.5288 | 1790.8033 | -153 | 0    | <b>R.SVLEDPQEDYPMQPK.D</b> Oxidation (M) |
| 226 - 238   | 1455.4855 | 1454.4782 | 1454.7630 | -196 | 0    | <b>R.QYVIHNSNPLATGR.R</b>                |
| 249 - 257   | 989.3113  | 988.3040  | 988.5077  | -206 | 0    | <b>R.DSLELSPTK.C</b>                     |
| 277 - 289   | 1338.4622 | 1337.4549 | 1337.6476 | -144 | 0    | <b>K.YGFGIQAANAGNR.K</b>                 |
| 323 - 332   | 1074.3601 | 1073.3528 | 1073.5652 | -198 | 1    | <b>K.RVMSSPVNGK.K</b>                    |
| 323 - 332   | 1090.3556 | 1089.3483 | 1089.5601 | -194 | 1    | <b>K.RVMSSPVNGK.K</b> Oxidation (M)      |
| 324 - 333   | 1062.3337 | 1061.3264 | 1061.5539 | -214 | 1    | <b>R.VMSSPVNGKK.K</b> Oxidation (M)      |
| 359 - 370   | 1438.4935 | 1437.4862 | 1437.7939 | -214 | 1    | <b>R.LSQVLRSEHELK.H</b>                  |
| 379 - 390   | 1425.5013 | 1424.4940 | 1424.8099 | -222 | 1    | <b>K.EAQQLRQQLAIK.E</b>                  |
| 476 - 484   | 973.3445  | 972.3373  | 972.5716  | -241 | 1    | <b>R.TVNTALAKR.V</b>                     |
| 508 - 515   | 906.3123  | 905.3050  | 905.3987  | -103 | 0    | <b>K.EMSPMPK.T</b>                       |
| 508 - 517   | 1167.4913 | 1166.4840 | 1166.5311 | -40  | 1    | <b>K.EMSPMPKTK.A</b> 2 Oxidation (M)     |
| 537 - 541   | 659.2599  | 658.2526  | 658.3187  | -100 | 0    | <b>R.WNSPR.A</b>                         |
| 561 - 575   | 1657.5952 | 1656.5879 | 1656.8835 | -178 | 1    | <b>K.LPFKSTGDVNQNPLK.D</b>               |
| 565 - 575   | 1172.3409 | 1171.3336 | 1171.5833 | -213 | 0    | <b>K.STGDVNQNPLK.D</b>                   |
| 608 - 626   | 2184.8768 | 2183.8695 | 2184.1399 | -124 | 1    | <b>K.NRISLLFTASQALENQHR.A</b>            |
| 610 - 626   | 1914.6770 | 1913.6697 | 1913.9959 | -170 | 0    | <b>R.ISSLLFTASQALENQHR.A</b>             |

Spot No.: 26

Mascot score: 81 Sequence coverage %: 36

NCBI accession No.: gi| 168014980

Matched peptides No.: 14

Total peptides No.: 115

Calculated Mr: 29082

Calculated pI: 9.53

### Annotated PMF spectra:

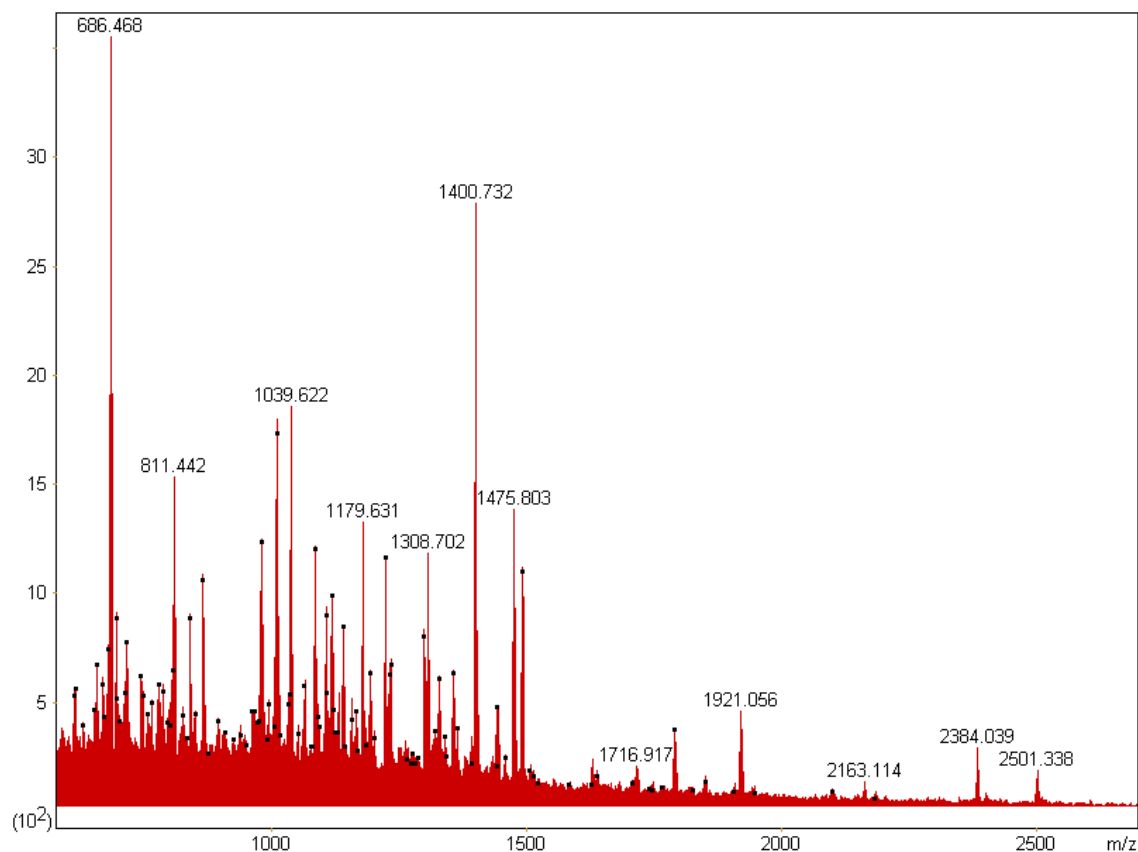

### Probability Based Mowse Score:

Protein score is  $-10 \cdot \log(P)$ , where P is the probability that the observed match is a random event. Protein scores greater than 72 are significant ( $p < 0.05$ ).

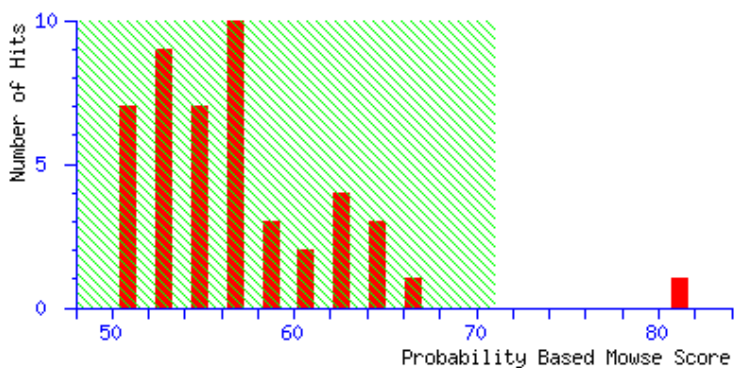

Matched peptide sequences: shown in **Bold Red**

**1 MSHENKSNMC CSSPPLR**HNT FPSTNSAFTF SFSKEAWLQD STFSTSFPAI  
**51 CGLFYWIPDN AIEIVVENQA GEISRSEVKE GSKKCLPKVL KANLCVGINN**  
**101 VTRTLERMPA KPAGASEGES QPKRSKTVDN TVTKLG TSAQ QLHPKSSNVT**  
**151 RLQAVIVAAD VQPKALVAHL GALCASRGVV ILPVSGGDGS GSLKLGEVLG**  
**201 TRAAIAIGIK HITNLR TETF PGRYSNQLG RGINYGNKTQ VTLLSLIPTA**  
**251 VSQVAADIK A TSRCCSCR**

Matched peptides information:

| Start - End | Observed  | Mr(expt)  | Mr(calc)  | ppm | Miss | Sequence               |
|-------------|-----------|-----------|-----------|-----|------|------------------------|
| 1 - 6       | 745.4594  | 744.4521  | 744.3224  | 174 | 0    | - .MSHENK. S           |
| 2 - 6       | 614.3925  | 613.3852  | 613.2820  | 168 | 0    | M. SHENK. S            |
| 7 - 17      | 1308.7024 | 1307.6951 | 1307.5421 | 117 | 0    | K. SNMCCSPPLR. H       |
| 92 - 103    | 1330.6993 | 1329.6920 | 1329.6823 | 7   | 0    | K. ANLCVGINNVTR. T     |
| 108 - 123   | 1584.8049 | 1583.7976 | 1583.7613 | 23  | 0    | R. MPAKPAGASEGESQPK. R |
| 108 - 124   | 1740.8432 | 1739.8359 | 1739.8624 | -15 | 1    | R. MPAKPAGASEGESQPK. S |
| 125 - 134   | 1092.5612 | 1091.5539 | 1091.5823 | -26 | 1    | R. SKTVDNVTVTK. L      |
| 127 - 134   | 877.4499  | 876.4426  | 876.4553  | -14 | 0    | K. TVDNVTVTK. L        |
| 135 - 145   | 1179.6310 | 1178.6237 | 1178.6408 | -14 | 0    | K. LGTSAQQLHPK. S      |
| 217 - 223   | 807.4535  | 806.4463  | 806.3923  | 67  | 0    | R. TETFPGR. R          |
| 217 - 224   | 963.5023  | 962.4950  | 962.4934  | 2   | 1    | R. TETFPGR. Y          |
| 224 - 231   | 993.5337  | 992.5264  | 992.5152  | 11  | 1    | R. RYSNQLGR. G         |
| 232 - 238   | 765.4524  | 764.4451  | 764.3817  | 83  | 0    | R. GINYGNK. T          |
| 260 - 268   | 1157.5975 | 1156.5902 | 1156.4536 | 118 | 1    | K. ATSRCCSCR. -        |

Spot No.: 27

Mascot score: 145    Sequence coverage %: 42

NCBI accession No.: gi| 27752799

Matched peptides No.: 26

Total peptides No.: 106

Calculated Mr: 47920

Calculated pI: 6.12

### Annotated PMF spectra:

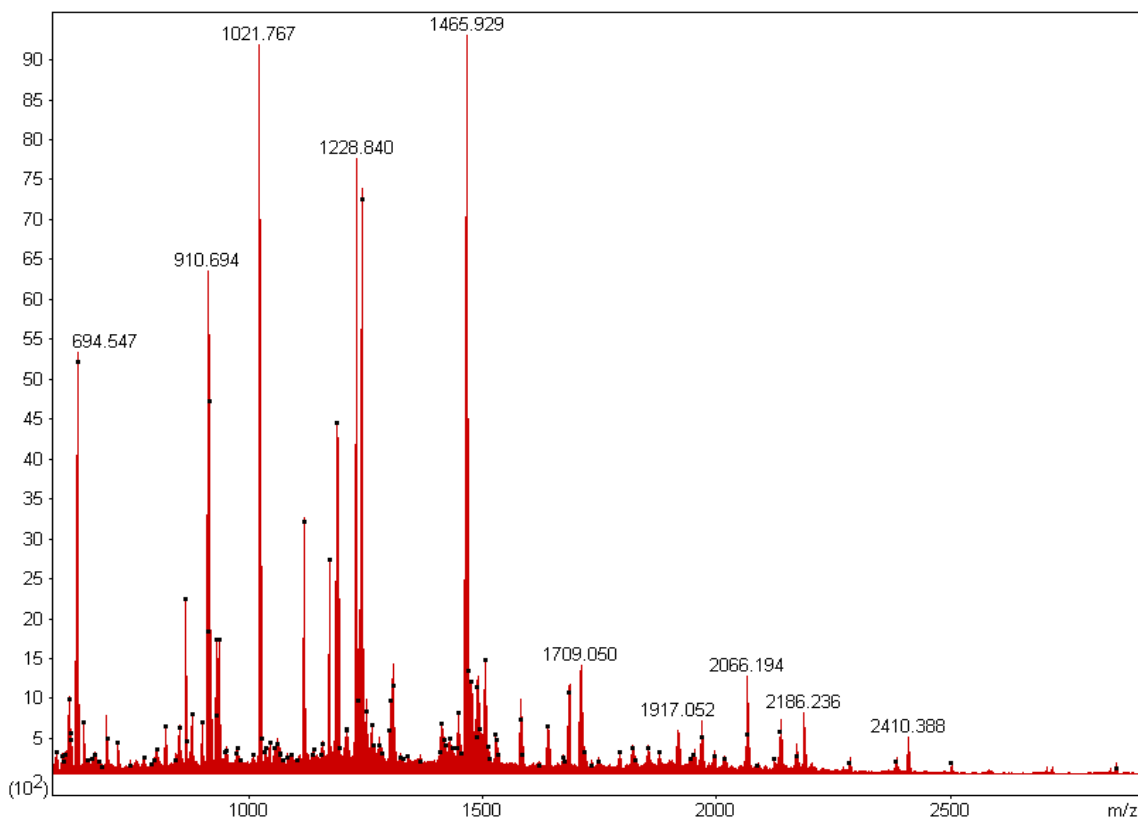

### Probability Based Mowse Score:

Protein score is  $-10 \cdot \log(P)$ , where P is the probability that the observed match is a random event. Protein scores greater than 72 are significant ( $p < 0.05$ ).

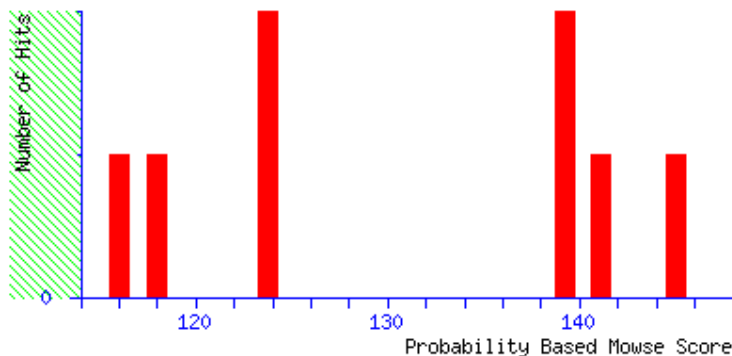

## Matched peptide sequences: shown in **Red**

**1** **KLTYTPEYE TKD**TDILAAF RVTVPQGVPP EEAGA AVAAE SSTGTWTTVW  
**51** TDGLTSLDRY KGRCYHIEPV PGEETQFIAY VAYPLDLFEE GSVTNMFTSI  
**101** VGNVFGFK**AL AAL**REDLRI **PPAYTKTFQG PPHGIQVERD** KLNKYGRPLL  
**151** GCTIKPKLGL SAKNYGRA**VY E**CLRGGLD**F**T **KDDENVNSQP FMR**WRDRFLF  
**201** CAEAIYKSQA ETGEIK**GHYL N**ATAGT**CEEM IKR**AVFAREL GVPIVMHDYL  
**251** TGGFTANTSL SHYCR**DNGLL L**HIHRAM**HAV IDR**QKNH**GMH FR**VLAKALRL  
**301** **SGGDH**HAGT **VVGK**LEG**DRE S**T**LGF**V**DLR** DDYVEKDRSR GIFFTQDWVS  
**351** LPGVLPVASG GIHVWHMPAL TEIFGDDSVL QFGGGTLGHP WGNAPGAVAN  
**401** **RVALEACVQA R**NEGRDL**AVE G**NEI**I**REACK

## Matched peptides information:

| Start - End | Observed  | Mr(expt)  | Mr(calc)  | ppm | Miss | Sequence                              |
|-------------|-----------|-----------|-----------|-----|------|---------------------------------------|
| 2 - 21      | 2410.3885 | 2409.3812 | 2409.1740 | 86  | 1    | K.LTYTPEYETK <b>TDILAAFR.V</b>        |
| 13 - 21     | 1021.7666 | 1020.7593 | 1020.5240 | 231 | 0    | K.DTDILAAFR.V                         |
| 109 - 119   | 1240.9356 | 1239.9283 | 1239.7299 | 160 | 1    | K.ALAALREDLR.I                        |
| 115 - 126   | 1415.9373 | 1414.9300 | 1414.7820 | 105 | 1    | R.LEDLRIPPAYTK.T                      |
| 120 - 126   | 789.6769  | 788.6697  | 788.4432  | 287 | 0    | R.IPPAYTK.T                           |
| 127 - 139   | 1465.9295 | 1464.9222 | 1464.7474 | 119 | 0    | K.TFQGGPPHGIQVER.D                    |
| 127 - 141   | 1709.0495 | 1708.0422 | 1707.8693 | 101 | 1    | K.TFQGGPPHGIQVERDK.L                  |
| 168 - 174   | 910.6939  | 909.6867  | 909.4378  | 274 | 0    | R.AVYECLR.G                           |
| 175 - 193   | 2170.1670 | 2169.1597 | 2168.9797 | 83  | 1    | R.GGLDFTKDDENVNSQPFMR.W               |
| 175 - 193   | 2186.2364 | 2185.2291 | 2184.9746 | 116 | 1    | R.GGLDFTKDDENVNSQPFMR.W Oxidation (M) |
| 217 - 233   | 1951.0774 | 1950.0701 | 1949.9087 | 83  | 1    | K.GHYLNATAGTCEEMIKR.A                 |
| 217 - 233   | 1967.1414 | 1966.1341 | 1965.9037 | 117 | 1    | K.GHYLNATAGTCEEMIKR.A Oxidation (M)   |
| 266 - 275   | 1187.8508 | 1186.8435 | 1186.6571 | 157 | 0    | R.DNGLLLHIHR.A                        |
| 276 - 283   | 912.7179  | 911.7106  | 911.4647  | 270 | 0    | R.AMHAVIDR.Q                          |
| 276 - 283   | 928.6998  | 927.6925  | 927.4596  | 251 | 0    | R.AMHAVIDR.Q Oxidation (M)            |
| 284 - 292   | 1154.7452 | 1153.7379 | 1153.5563 | 157 | 1    | R.QKNHGMHFR.V                         |
| 284 - 292   | 1170.8137 | 1169.8064 | 1169.5512 | 218 | 1    | R.QKNHGMHFR.V Oxidation (M)           |
| 286 - 292   | 898.6489  | 897.6416  | 897.4028  | 266 | 0    | K.NHGMHFR.V                           |
| 286 - 292   | 914.6479  | 913.6406  | 913.3977  | 266 | 0    | K.NHGMHFR.V Oxidation (M)             |
| 300 - 314   | 1447.9304 | 1446.9231 | 1446.7579 | 114 | 0    | R.LSGGDH>HAGTVVVGK.L                  |
| 315 - 330   | 1820.1394 | 1819.1321 | 1818.9476 | 101 | 1    | K.LEGDRESTLGFVDLLR.D                  |
| 320 - 330   | 1249.8421 | 1248.8348 | 1248.6714 | 131 | 0    | R.ESTLGFVDLLR.D                       |
| 402 - 411   | 1116.8063 | 1115.7990 | 1115.5757 | 200 | 0    | R.VALEACVQAR.N                        |
| 412 - 426   | 1685.0548 | 1684.0475 | 1683.8540 | 115 | 1    | R.NEGRDLAVEGNEIIR.E                   |
| 416 - 426   | 1228.8397 | 1227.8324 | 1227.6459 | 152 | 0    | R.DLAVEGNEIIR.E                       |
| 416 - 430   | 1717.0479 | 1716.0406 | 1715.8512 | 110 | 1    | R.DLAVEGNEIIREACK.-                   |

Spot No.: 28

Mascot score: 104    Sequence coverage %: 24

NCBI accession No.: gi| 2623298

Matched peptides No.: 21

Total peptides No.: 56

Calculated Mr: 86044

Calculated pI: 5.57

### Annotated PMF spectra:

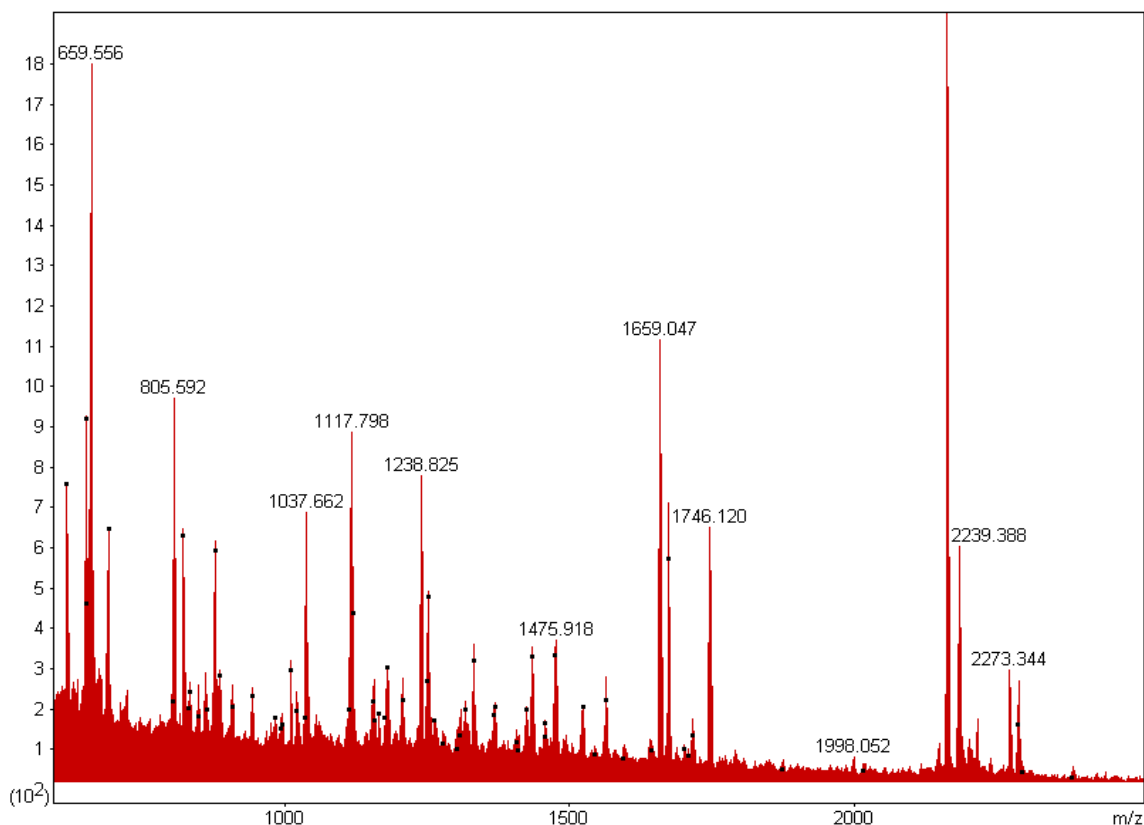

### Probability Based Mowse Score:

Protein score is  $-10 \cdot \log(P)$ , where P is the probability that the observed match is a random event. Protein scores greater than 72 are significant ( $p < 0.05$ ).

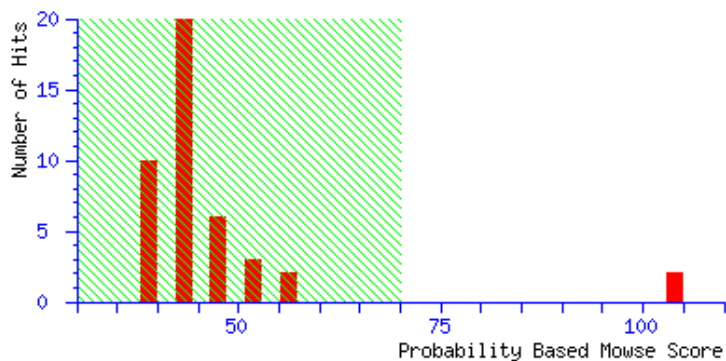



Matched peptide sequences: shown in **Bold Red**

```

1 MPWRGAGVAV PMFSVRSEDD VGVGEFLDLK LLVDWAVDSG LHLVQLLPVN
51 DTSVHKMWWD SYPYSSLSVF ALHPLYLRVQ ALSERLPEDI KRLLSNILAD
101 LFRSLSGRNS EGEESTGQEC NESLVRRFID FLTFTSLKKI ASDKRDIVFL
151 NGLCLYQHDV FKRLQAIGSY DVDYEATMET KLSIAKKIFD IEKDQTLNSS
201 TFQKFFSENE GWLKPAAFC FLRDFFETSD HSQWGTFSYD TDDKLSAAAE
251 YARKKGVVLK GDLPIGVDRN SVDTWVYRNL FRMNTSTGAP PDYFDKNGQN
301 WGFPTYNWEE MSKDNYAWWR ARLTQMGKYF TAYRIDHILG FFRIWELPAH
351 AMTGLVGKFR PSIPLSQEEL EKEGIWDFDR LSKPYIQKFF LEEKFGDFWP
401 FIASNFLNET QKDMYEFKED CNTEKKIVAK LKSLAEKSLL LENEDKVRD
451 VFDILRNVVL IKDPEDARKF YPRFNIEDTS SFQDLDHSK NVLKRLYYDY
501 YFQRQEDLWR KNALKTLPAL LNSSNMLACG EDLGLIPSCV HPKHMLKLIV
551 TQVMQELGLV GLRIQRMPSE SDVKFGIPSN YDYMTVCAPS CHDCSTLRAW
601 WEEDEERRQQ YFKEVIGVDG IPSPQCIPEI THFILRQHVE APSMWAIFPL
651 QDMMALKEEY TTRPATEETI NDPTNPKHYW RYRVHVTLDS LLKDTDLKST
701 IKNLVSSSGR SVPANVSGED INKSRGEVIA NGSTKPNP

```

Matched peptides information:

| Start - End | Observed  | Mr (expt) | Mr (calc) | ppm | Miss | Sequence                               | Oxidation (M) |
|-------------|-----------|-----------|-----------|-----|------|----------------------------------------|---------------|
| 5 - 16      | 1206.8092 | 1205.8019 | 1205.6227 | 149 | 0    | R.GAGVAV <b>PMFSVR</b> .S              | Oxidation (M) |
| 17 - 30     | 1522.9188 | 1521.9115 | 1521.7199 | 126 | 0    | R. <b>SEDDVGVGEFLDLK</b> .L            |               |
| 79 - 85     | 802.6003  | 801.5930  | 801.4344  | 198 | 0    | R.VQ <b>ALSER</b> .L                   |               |
| 140 - 145   | 689.4823  | 688.4751  | 688.3868  | 128 | 1    | K.IASDKR.D                             |               |
| 182 - 187   | 659.5560  | 658.5487  | 658.4377  | 169 | 1    | K.L <b>SI</b> AKK.I                    |               |
| 261 - 269   | 941.6666  | 940.6594  | 940.4978  | 172 | 0    | K.GD <b>LP</b> IGVDR.N                 |               |
| 314 - 320   | 1010.6245 | 1009.6172 | 1009.4406 | 175 | 0    | K.D <b>NY</b> AWWR.A                   |               |
| 329 - 334   | 820.5739  | 819.5667  | 819.3915  | 214 | 0    | K.Y <b>FT</b> AYR.I                    |               |
| 335 - 343   | 1117.7975 | 1116.7902 | 1116.6080 | 163 | 0    | R.IDHILG <b>FFR</b> .I                 |               |
| 359 - 372   | 1673.0647 | 1672.0574 | 1671.8831 | 104 | 0    | K.FR <b>PSIPLSQEEL</b> E.K             |               |
| 373 - 380   | 1037.6623 | 1036.6550 | 1036.4614 | 187 | 0    | K.E <b>GI</b> WDFDR.L                  |               |
| 438 - 448   | 1315.8707 | 1314.8634 | 1314.7143 | 113 | 1    | K.S <b>LLLE</b> NEDKVR.R               |               |
| 450 - 456   | 877.6575  | 876.6502  | 876.4705  | 205 | 0    | R.D <b>VF</b> DILR.N                   |               |
| 457 - 468   | 1368.9142 | 1367.9069 | 1367.7409 | 121 | 1    | R.N <b>VV</b> L <b>IKDP</b> EDAR.K     |               |
| 470 - 473   | 582.4719  | 581.4646  | 581.2962  | 290 | 0    | K.F <b>YPR</b> .F                      |               |
| 474 - 490   | 1998.0519 | 1997.0446 | 1996.8650 | 90  | 0    | R.F <b>NIEDTSSFQD</b> LDH <b>SK</b> .N |               |
| 496 - 504   | 1330.8032 | 1329.7959 | 1329.6030 | 145 | 0    | R.L <b>YDY</b> Y <b>FQR</b> .Q         |               |
| 505 - 510   | 846.5635  | 845.5562  | 845.4032  | 181 | 0    | R.Q <b>ED</b> LWR.K                    |               |
| 599 - 607   | 1249.7305 | 1248.7232 | 1248.5047 | 175 | 0    | R.A <b>W</b> W <b>EEDEER</b> .R        |               |
| 599 - 608   | 1405.7905 | 1404.7832 | 1404.6058 | 126 | 1    | R.A <b>W</b> W <b>EEDEER</b> .Q        |               |
| 694 - 702   | 1020.6492 | 1019.6419 | 1019.5499 | 90  | 1    | K.D <b>TD</b> LK <b>STIK</b> .N        |               |

Spot No.: 29

Mascot score: 110 Sequence coverage %: 24

NCBI accession No.: gi| 312283107

Matched peptides No.: 17

Total peptides No.: 42

Calculated Mr: 78095

Calculated pI: 5.74

### Annotated PMF spectra:

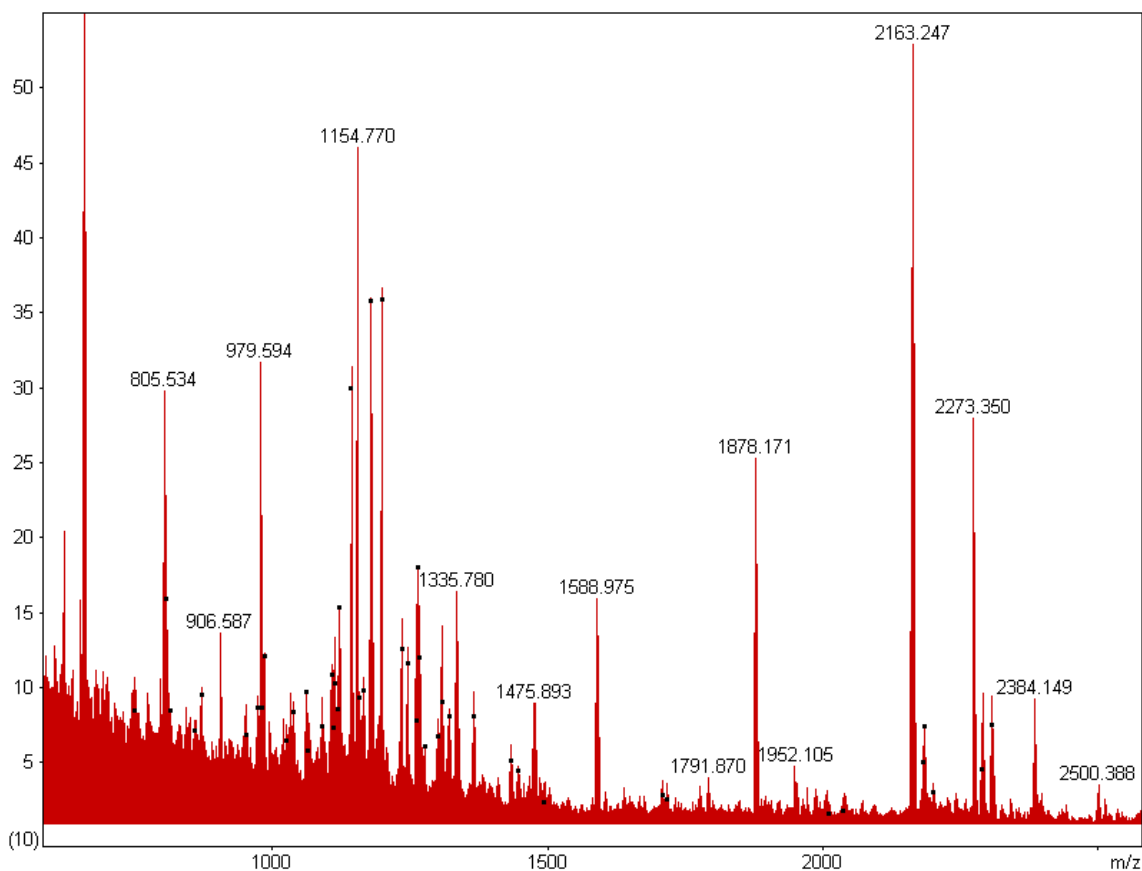

### Probability Based Mowse Score:

Protein score is  $-10 \cdot \log(P)$ , where P is the probability that the observed match is a random event. Protein scores greater than 72 are significant ( $p < 0.05$ ).

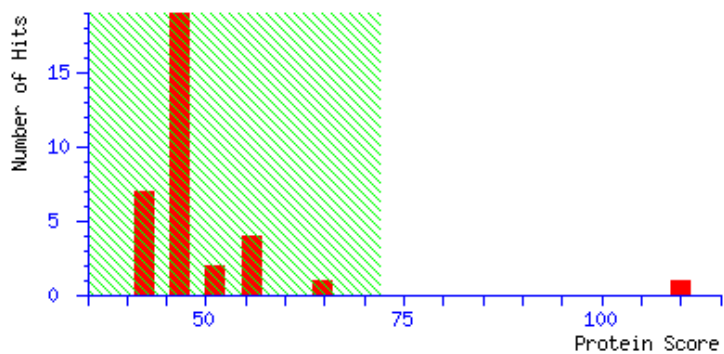

Matched peptide sequences: shown in **Bold Red**

```

1 MEELDRSRAF AKDVKRIVVK VGTAVVTGKG GRLALGRLGA LCEQLAELNS
51 DGFEVILVSS GAVGLGRQRL RYRQLVNSSF ADLQKPQSEL DGKACAGVGQ
101 SSLMAYYETM FDQLDVTAAQ LLVNDSSFRD KDFRKQLNET VKSMLDLRVI
151 PIFNENDAIS TRRAPYQDSS GIFWDNDSLAL ALLALELKAD LLILLSDVEG
201 LYTGPPSDPN SKLIHTFIKE KHQDEITFGD KSRLGRGGMT AKVKAAVNAA
251 YAGIPVIITS GYSAENIDKV LRGLRVGTLF HQDARQWAPI TDSTARDMAV
301 AAESSRKLQ ALSSEDRKQI LYNIADALEA NEKTIRDENE LDVSAAQEAG
351 FEESLVARLV MTPAKISSLA ASVRKLADME DPIGRVLKKT EVADGLVLEK
401 TSSPLGVLLI VFESRPDALV QIASLAIRSG NGLLLKGGKE ARRSNAILHK
451 VITDAIPETV GGKLIGLVTS REEIPDLLKL DDVIDLVIPR GSNKLVSQIK
501 NTKIPVLGH ADGICHVYVD KSCNLDMAKR IISDAKLDYP AACNAMETLL
551 VHKDLEQNGL NELIFVLQSN GVTVYGGPRA SAILNIPEAR SFNYEYCSKA
601 CTVEVVEDVY GAIDHIHRHG SAHTDCIVTE DTEVAELFLR QVDSAAVFHN
651 ASTRFSDGAR FGLGAEVGIS TGRIHARGPV GVEGLLTTRW LMRGKGQVVD
701 GDNGIAYTHQ DIPIQS

```

Matched peptides information:

| Start - End | Observed  | Mr (expt) | Mr (calc) | ppm | Miss | Sequence                    |
|-------------|-----------|-----------|-----------|-----|------|-----------------------------|
| 130 - 134   | 680.4588  | 679.4515  | 679.3289  | 180 | 1    | R.DKDFR.K                   |
| 149 - 162   | 1588.9751 | 1587.9678 | 1587.8257 | 90  | 0    | R.VIPIFNENDAISTR.R          |
| 220 - 231   | 1446.8472 | 1445.8399 | 1445.6787 | 112 | 1    | K.EKHQDEITFGDK.S            |
| 234 - 242   | 906.5870  | 905.5797  | 905.4753  | 115 | 1    | R.LGRGGMTAK.V Oxidation (M) |
| 237 - 244   | 807.4981  | 806.4908  | 806.4320  | 73  | 1    | R.GGMTAKVK.A Oxidation (M)  |
| 276 - 285   | 1143.7019 | 1142.6946 | 1142.5833 | 97  | 0    | R.VGTLFQDAR.Q               |
| 286 - 296   | 1245.7168 | 1244.7095 | 1244.6149 | 76  | 0    | R.QWAPITDSTAR.D             |
| 297 - 303   | 749.4634  | 748.4562  | 748.3538  | 137 | 0    | R.DMAVAAR.E Oxidation (M)   |
| 464 - 471   | 858.6027  | 857.5955  | 857.5334  | 72  | 0    | K.LIGLVTSR.E                |
| 480 - 490   | 1267.8337 | 1266.8264 | 1266.7184 | 85  | 0    | K.LDDVIDLVIPR.G             |
| 580 - 590   | 1154.7698 | 1153.7625 | 1153.6455 | 101 | 0    | R.ASAILNIPEAR.S             |
| 600 - 618   | 2183.2279 | 2182.2206 | 2182.0477 | 79  | 0    | K.ACTVEVVEDVYGAIDHIHR.H     |
| 619 - 640   | 2500.3880 | 2499.3807 | 2499.1700 | 84  | 0    | R.HGSAHTDCIVTEDTEVAELFLR.Q  |
| 655 - 660   | 652.3950  | 651.3877  | 651.2976  | 138 | 0    | R.FSDGAR.F                  |
| 661 - 673   | 1263.7771 | 1262.7698 | 1262.6619 | 85  | 0    | R.FGLGAEVGISTGR.I           |
| 678 - 689   | 1198.7764 | 1197.7691 | 1197.6718 | 81  | 0    | R.GPVGVEGLLTTR.W            |
| 690 - 693   | 621.4161  | 620.4088  | 620.3104  | 159 | 0    | R.WLMR.G Oxidation (M)      |

Spot No.: **30**

Mascot score: **102** Sequence coverage %: **16**

NCBI accession No.: **gi| 157342076**

Matched peptides No.: **13**

Total peptides No.: **26**

Calculated Mr: **78285**

Calculated pI: **4.98**

### Annotated PMF spectra:

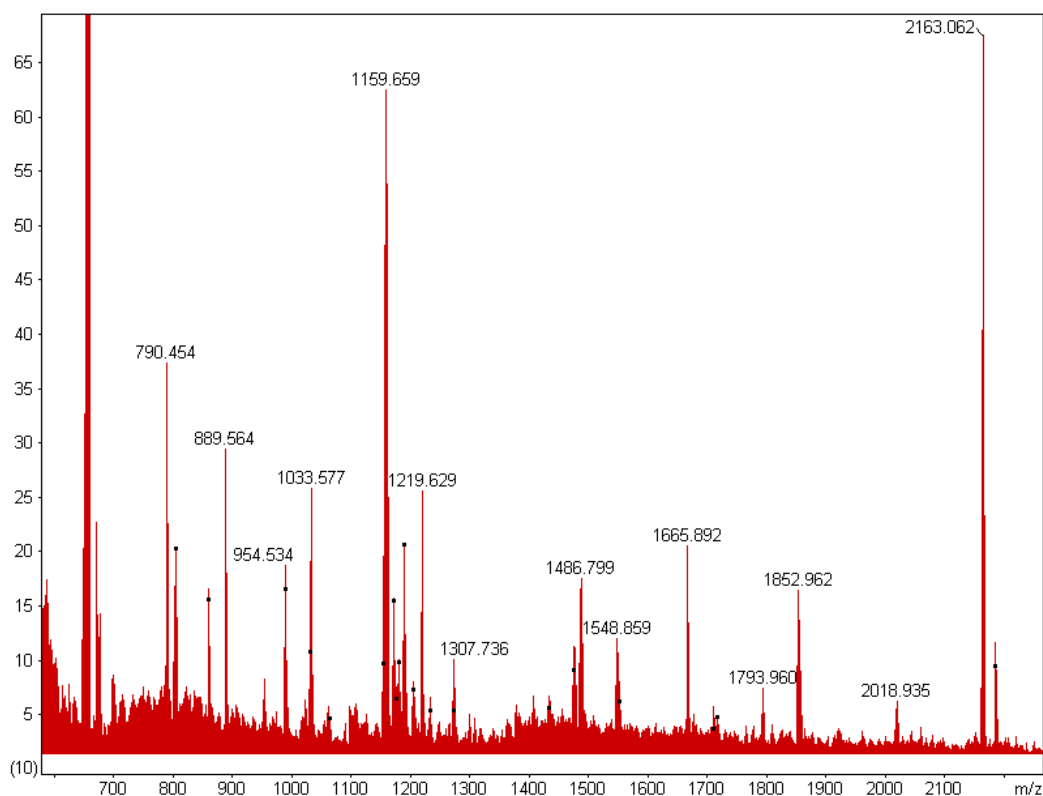

### Probability Based Mowse Score:

Protein score is  $-10 \cdot \log(P)$ , where P is the probability that the observed match is a random event. Protein scores greater than 72 are significant ( $p < 0.05$ ).

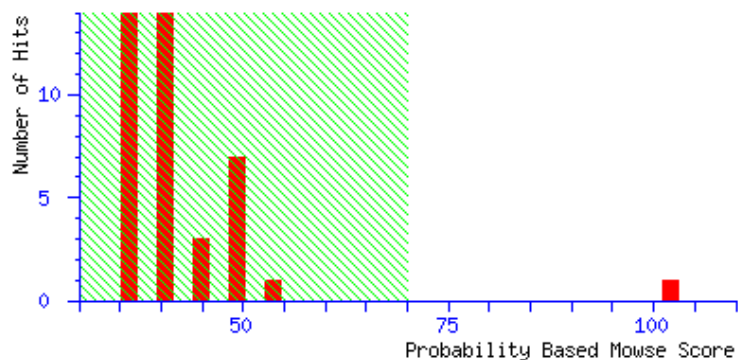

## Matched peptide sequences: shown in **Bold Red**

```

 1 MASNEGFLTN EQRETLKMAT QNAEGLSSSP KSPTSLLSEH HIKVPVSGKA
51 PTAGIAVRHV RRSMSGKQFVR VKKDGAGGKG TWGKLLDTDG ESHIDRNDPN
101 YDSGEEPYQL VGSTISDPLD EYKKAVVSII EEYFSTGDVE LAASDLRELG
151 SNEYHPYFIK RLVSMAMDRH DKEKEMASVL LSALYADVIS SAQISQGGFI
201 LLESADDLAV DILDAVDVLA LFIARAVVDD ILPPAFLTRA KKTLPESSKG
251 HQVIQTAEKS YLSAPHHAEI VERRWGGSTH ITVEEVKKKI ADLLREYVES
301 GDAFEACRCI RELGVSFFHH EVVKRALVLA MEIRTAEPLI LKLLKEAAEE
351 GLISSQMLK GFARLAESLD DLALDIPSAK TLFELLVPAK ISQGWLDAF
401 LKPAGEDGEV HNEDEKVRK FKEEAVAIH EYFLSDDIPE LIRSLEDLGM
451 PKFNPIFLKK LITLAMDRKN REKEMASVLL SSLHIEIFST EDIVNGFVML
501 LESAEPTALD VLDASNELAL FLARAVIDDV LAPLNLEEIG SKLPPNCSGS
551 ETVHMARSLI AARHAGERIL RCWGGGTGWA VEDAKDKIMK LLEEYESGGD
601 VGEACQCIRD LGMPFFNHEV VKKALVMAME KKNDRMLDLL QECFCEGLIT
651 INQMTKGFGR IKDGLDDLAL DIPNAEEKFS FYVEYARKMG WLLASFESSA
701 ATDS

```

## Matched peptides information:

| Start - End | Observed  | Mr(expt)  | Mr(calc)  | ppm  | Miss Sequence                              |
|-------------|-----------|-----------|-----------|------|--------------------------------------------|
| 74 - 84     | 1033.5765 | 1032.5692 | 1032.4989 | 68   | 1 K.DGAGGKG <b>TWGL</b> .L                 |
| 162 - 169   | 954.5337  | 953.5264  | 953.4310  | 100  | 0 R.LVSMAMDR.H 2 Oxidation (M)             |
| 170 - 174   | 656.1854  | 655.1782  | 655.3289  | -230 | 1 R.HDKEK.E                                |
| 242 - 249   | 889.5638  | 888.5565  | 888.4916  | 73   | 1 K.KTLPESSK.G                             |
| 243 - 259   | 1852.9615 | 1851.9542 | 1851.9690 | -8   | 1 K.TLPESSKG <b>HQVIQTAEK</b> .S           |
| 325 - 334   | 1171.6483 | 1170.6410 | 1170.6907 | -42  | 1 K.RALV <b>LAMEIR</b> .T                  |
| 326 - 334   | 1031.5831 | 1030.5758 | 1030.5845 | -8   | 0 R.ALVL <b>LAMEIR</b> .T Oxidation (M)    |
| 444 - 452   | 989.5998  | 988.5926  | 988.4899  | 104  | 0 R.SLEDL <b>GMPK</b> .F                   |
| 558 - 568   | 1180.6344 | 1179.6271 | 1179.6472 | -17  | 1 R.SL <b>IAARHAGER</b> .I                 |
| 586 - 590   | 650.1971  | 649.1899  | 649.3469  | -242 | 1 K.DKIMK.L Oxidation (M)                  |
| 591 - 609   | 2185.0557 | 2184.0484 | 2183.9463 | 47   | 0 K.LLEEYESGGD <b>VGEACQCIR</b> .D         |
| 610 - 622   | 1548.8589 | 1547.8516 | 1547.7443 | 69   | 0 R.DL <b>GMPFFNHEVVK</b> .K Oxidation (M) |
| 657 - 662   | 677.3934  | 676.3861  | 676.4020  | -24  | 1 K.G <b>FGRIK</b> .D                      |

Spot No.: **31**

Mascot score: **98**    Sequence coverage %: **20**

NCBI accession No.: **gi| 4586021**

Matched peptides No.: **23**

Total peptides No.: **68**

Calculated Mr: **98720**

Calculated pI: **5.79**

### Annotated PMF spectra:

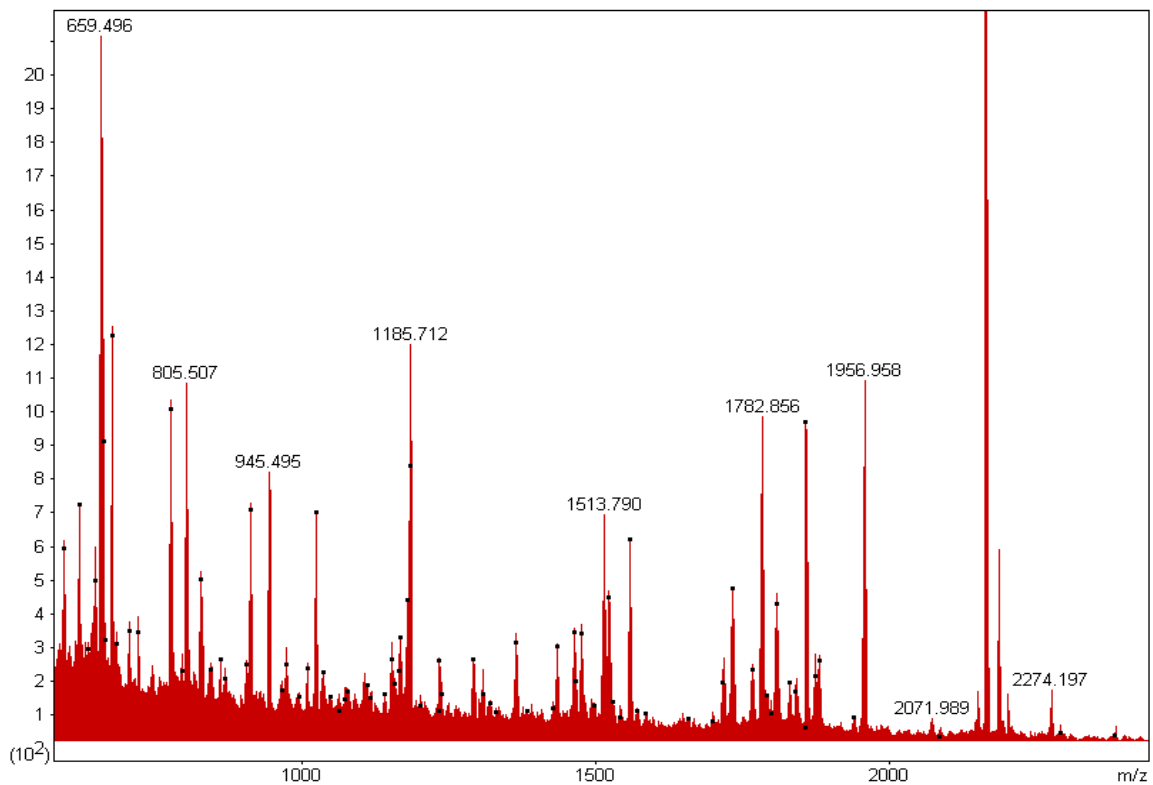

### Probability Based Mowse Score:

Protein score is  $-10 \cdot \log(P)$ , where P is the probability that the observed match is a random event. Protein scores greater than 72 are significant ( $p < 0.05$ ).

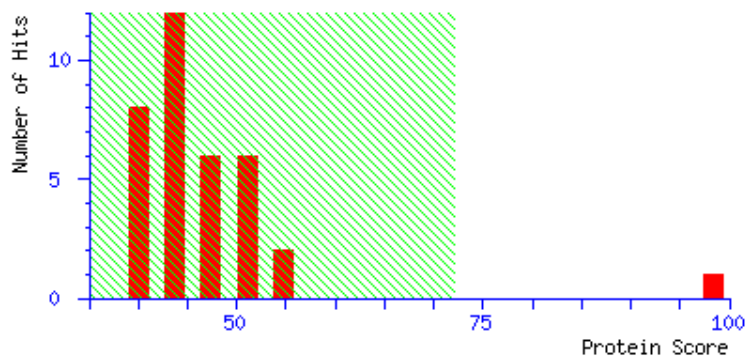

## Matched peptide sequences: shown in **Red**

1 MASEHPFKGI FTTLPKPGGG EFGK**FYSLPA** LNDPRVDKLP YSIR**ILLESA**  
 51 **IRNCDNFQVT** KEDVEKIIDW EKTSPK**QVEI** **PFKPARVLLQ** DFTGVPVAVD  
 101 LACMRDAMNK LGSDSNKINP LVPVDLVIDH SVQVDVARSE NAVQANMELE  
 151 FQRNKERFAF LKWGSTAFQN MLVVPPGSGI VHQVNLEYLG **RVVFN**TK**GLL**  
 201 YPDSVVGTDS HTTMIDGLGV AGWGVGGIEA EATMLGQPMS MVLPGVVGFK  
 251 LAGKMRNGVT ATDLVLTVTQ MLRKHGVVVGK FVEFYGNMGMS GLSLADRATI  
 301 ANMSPEYGAT MGFFPVVDHVT LQYLKLTGRS **DE**TVAMIEAY**** **LRAN**NMFVDY****  
 351 **NEPQ**QDRVYS**** SYLELNDDV EPCISGPKRP HDRVTLKEMK ADWHSCLDISK  
 401 **VG**FKGF**AI**PK**** EAQEKVVNFS FDGQPAELKH GSVVIAAITS CTNTSNPSVM  
 451 LGAGLVAKKA CDLGLQVKPW IKTSLAPGSG VVTKYLLKSG LQEYLN**EQGF**  
 501 NIVGYGCTTC IGNSGEINES VGAAITENDI VAAAVLSGNR **N**FEGRVHPL**T**  
 551 **RAN**YL**AS**PPL**** VVAYALAGTV NIDFETEPG KGNKGDVFL RDIWPTEEI  
 601 AEVVQSSVLP DMFRATYESI **TK**GNPMW**NKL** SVPENTLYSW DPNSTYIHEP  
 651 PYFKDMTMDP PGPHNVKDAY CLLNFGDSIT TDHISPAGNI QKDS**PAAKFL**  
 701 MERGVDR**KDF** **NSYGSRRGND** **EIMARGTFAN** **IRIVNKL**MNG**** EVGPK**TVHIP**  
 751 **S**GEKLSV**FDA** **AMRYKSSGED** **TIILAGAEYG** **SGSSRDWA**AK**** **GPMLQ**GVKAV****  
 801 IAKSFERIHR SNLVGMGIIP LCFKSGEDAD TLGLTGHERY **TIHL**PTDISE****  
 851 **IRPGQDV**TVT**** TDNGK**S**FTCT**** **VRFDTEVELA** YFNHGGILPY VIRNLSKQ

## Matched peptides information:

| Start - End | Observed  | Mr (expt) | Mr (calc) | ppm | Miss | Sequence                                 |
|-------------|-----------|-----------|-----------|-----|------|------------------------------------------|
| 25 - 35     | 1292.7140 | 1291.7067 | 1291.6561 | 39  | 0    | K.FYSLPALNDPR.V                          |
| 45 - 52     | 914.6371  | 913.6298  | 913.5596  | 77  | 0    | R.ILLESAIR.N                             |
| 77 - 86     | 1184.7371 | 1183.7298 | 1183.6713 | 49  | 1    | K.QVEIPFKPAR.V                           |
| 192 - 197   | 707.4732  | 706.4660  | 706.4014  | 91  | 0    | R.VVENTK.G                               |
| 330 - 342   | 1497.7968 | 1496.7895 | 1496.7181 | 48  | 0    | R.SDET <b>VAMIEAYLR.A</b>                |
| 330 - 342   | 1513.7895 | 1512.7822 | 1512.7130 | 46  | 0    | R.SDET <b>VAMIEAYLR.A</b> Oxidation (M)  |
| 343 - 357   | 1840.8405 | 1839.8332 | 1839.7846 | 26  | 0    | R.ANN <b>MFVDYNEPQDR.V</b>               |
| 401 - 410   | 1063.5641 | 1062.5568 | 1062.6226 | -62 | 1    | K.VG <b>FKGF</b> AI <b>PK.E</b>          |
| 541 - 545   | 622.4040  | 621.3968  | 621.2871  | 177 | 0    | R.N <b>FEGR.V</b>                        |
| 546 - 551   | 722.5078  | 721.5005  | 721.4235  | 107 | 0    | R.VH <b>PLTR.A</b>                       |
| 623 - 629   | 862.4907  | 861.4834  | 861.3803  | 120 | 0    | K.GN <b>PMW</b> NK.L Oxidation (M)       |
| 708 - 716   | 1073.5702 | 1072.5629 | 1072.4938 | 64  | 1    | R.KD <b>FN</b> SYGSR.R                   |
| 709 - 716   | 945.4952  | 944.4879  | 944.3988  | 94  | 0    | K.D <b>FN</b> SYGSR.R                    |
| 717 - 725   | 1077.5212 | 1076.5139 | 1076.5033 | 10  | 1    | R.RG <b>NDE</b> IMAR.G Oxidation (M)     |
| 726 - 732   | 778.5166  | 777.5094  | 777.4133  | 124 | 0    | R.G <b>TFANIR.I</b>                      |
| 726 - 736   | 1232.6783 | 1231.6710 | 1231.7037 | -27 | 1    | R.G <b>TFANIRIVNK.L</b>                  |
| 746 - 754   | 967.5365  | 966.5292  | 966.5134  | 16  | 0    | K.T <b>VHIP</b> SGEK.L                   |
| 755 - 763   | 1009.5864 | 1008.5791 | 1008.5062 | 72  | 0    | K.L <b>SVF</b> DAAMR.Y                   |
| 755 - 763   | 1025.5695 | 1024.5622 | 1024.5012 | 60  | 0    | K.L <b>SVF</b> DAAMR.Y Oxidation (M)     |
| 766 - 785   | 1956.9583 | 1955.9510 | 1955.9072 | 22  | 0    | K.S <b>SGED</b> TIILAGAEY <b>SGSSR.D</b> |
| 791 - 798   | 829.3971  | 828.3898  | 828.4528  | -76 | 0    | K.G <b>PMLQ</b> GVK.A                    |
| 840 - 852   | 1557.7875 | 1556.7802 | 1556.8198 | -25 | 0    | R.Y <b>TIHL</b> PTDISEIR.P               |
| 866 - 872   | 870.5138  | 869.5065  | 869.4066  | 115 | 0    | K.S <b>FTCT</b> VR.F                     |

Spot No.: **32**

Mascot score: **123** Sequence coverage %: **16**

NCBI accession No.: **gi| 4586021**

Matched peptides No.: **18**

Total peptides No.: **33**

Calculated Mr: **98720**

Calculated *pI*: **5.79**

### Annotated PMF spectra:

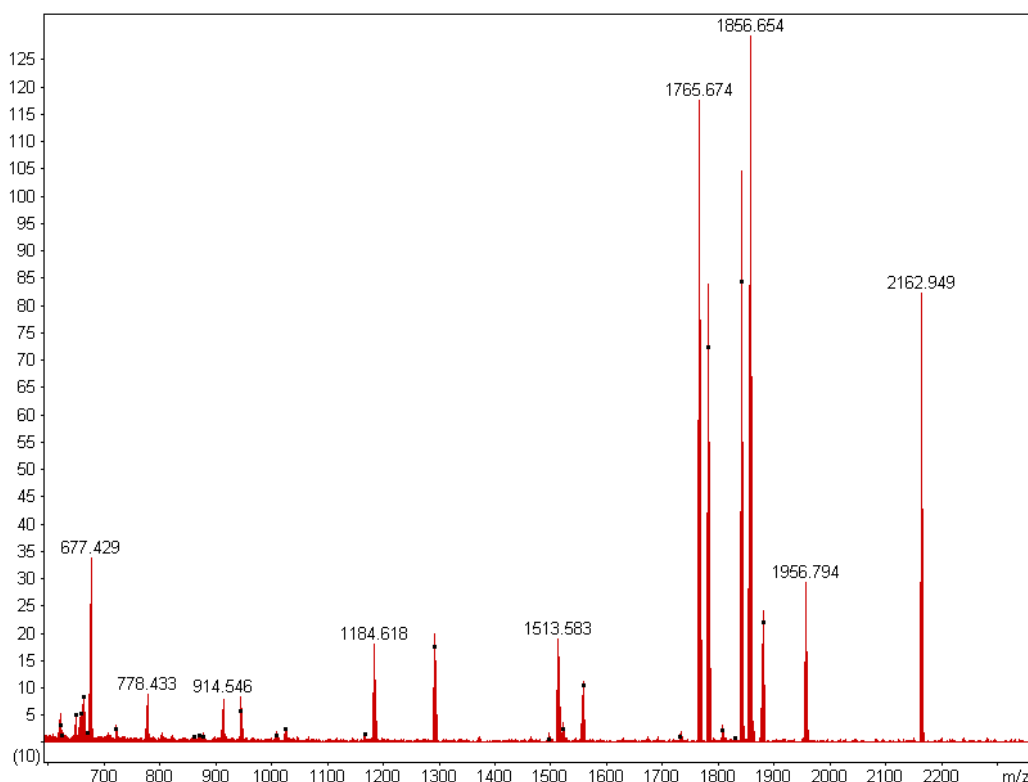

### Probability Based Mowse Score:

Protein score is  $-10 \cdot \log(P)$ , where  $P$  is the probability that the observed match is a random event. Protein scores greater than 72 are significant ( $p < 0.05$ ).

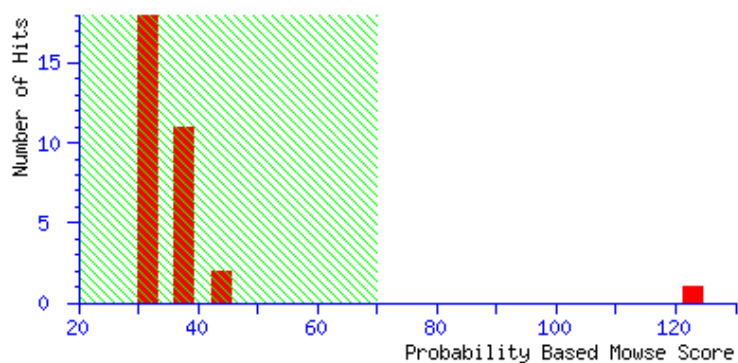



## Matched peptide sequences: shown in **Bold Red**

```

1 MASEHPFKGI FTTLPKPGGG EFGKFYSLPA LNDPRVDKLP YSIRILLESA
51 IRNCDFQVT KEDVEKIIDW EKTSPKQVEI PFKPARVLLQ DFTGVPAVVD
101 LACMRDAMNK LGSDSNKINP LVPVDLVIDH SVQVDVARSE NAVQANMELE
151 FQRNKERFAF LKWSTAFQN MLVVPPGSGI VHQVNLEYLG RVVFNTKGLL
201 YPDSVVGTDS HTTMIDGLGV AGWGVGGIEA EATMLGQPMS MVLPGVVGFK
251 LAGKMRNGVT ATDLVLTVTQ MLRKHGVVGK FVEFYGNGMS GLSLADRATI
301 ANMSPEYGAT MGFFPVDHVT LQYLKLTGRS DETVAMIEAY LRANMFVDY
351 NEPQQRVVYS SYLELNLDDV EPCISGPKRP HDRVTLKEMK ADWHSCLDSK
401 VGFKGFAIPK EAQEKVVNFS FDGQPAELKH GSVVIAAITS CTNTSNPSVM
451 LGAGLVAKKA CDLGLQVKPW IKTSLAPSGS VVTKYLLKSG LQEYLNEQGF
501 NIVGYGCTTC IGNSGEINES VGAAITENDI VAAAVLSGMR NFEGRVHPLT
551 RANYLASPPL VWAYALAGTV NIDFETEPIG KGKNGKDVFL RDIWPTTEEI
601 AEVVQSSVLP DMFRATYESI TKGNPMWNKL SVPENTLYSW DPNSTYIHEP
651 PYFKDMTMDP PGPHNVKDAY CLLNFGDSIT TDHISPAGNI QKDSPAAKFL
701 MERGVDRKDF NSYGSRRRGND EIMARGTFAN IRIVNKLMNG EVGPKTVHIP
751 SGEKLSVFDA AMRYKSSGED TIILAGAEYG SGSSRDWAAK GPMLQGVKAV
801 IAKSFERIHR SNLVGMGIIP LCFKSGEDAD TLGLTGHERY TIHLPTDISE
851 IRPGQDVTVT TDNGKSFTCT VRFDTEVELA YFNHGGILPY VIRNLSKQ

```

## Matched peptides information:

| Start - End | Observed  | Mr(expt)  | Mr(calc)  | ppm | Miss | Sequence                          |
|-------------|-----------|-----------|-----------|-----|------|-----------------------------------|
| 25 - 35     | 1292.5758 | 1291.5685 | 1291.6561 | -68 | 0    | K.FYSLPALNDPR.V                   |
| 45 - 52     | 914.5460  | 913.5388  | 913.5596  | -23 | 0    | R.ILLESAIR.N                      |
| 77 - 86     | 1184.6179 | 1183.6106 | 1183.6713 | -51 | 0    | K.QVEIPFKPAR.V                    |
| 139 - 153   | 1765.6744 | 1764.6671 | 1764.8101 | -81 | 0    | R.SENAVQANMELEFQR.N               |
| 139 - 153   | 1781.6735 | 1780.6662 | 1780.8050 | -78 | 0    | R.SENAVQANMELEFQR.N Oxidation (M) |
| 158 - 162   | 625.3991  | 624.3918  | 624.3635  | 45  | 0    | R.FAFLK.W                         |
| 330 - 342   | 1497.6232 | 1496.6159 | 1496.7181 | -68 | 0    | R.SDETVAMIEAYLR.A                 |
| 330 - 342   | 1513.5832 | 1512.5759 | 1512.7130 | -91 | 0    | R.SDETVAMIEAYLR.A Oxidation (M)   |
| 343 - 357   | 1840.6524 | 1839.6451 | 1839.7846 | -76 | 0    | R.ANNMFVDYNEPQQDR.V               |
| 343 - 357   | 1856.6539 | 1855.6466 | 1855.7795 | -72 | 0    | R.ANNMFVDYNEPQQDR.V Oxidation (M) |
| 541 - 545   | 622.3393  | 621.3321  | 621.2871  | 72  | 0    | R.NFEGR.V                         |
| 709 - 716   | 945.3825  | 944.3752  | 944.3988  | -25 | 0    | K.DFNSYGSR.R                      |
| 726 - 732   | 778.4329  | 777.4256  | 777.4133  | 16  | 0    | R.GTFANIR.I                       |
| 755 - 763   | 1009.4719 | 1008.4646 | 1008.5062 | -41 | 0    | K.LSVFDAAMR.Y                     |
| 755 - 763   | 1025.4610 | 1024.4537 | 1024.5012 | -46 | 0    | K.LSVFDAAMR.Y Oxidation (M)       |
| 766 - 785   | 1956.7935 | 1955.7862 | 1955.9072 | -62 | 0    | K.SSGEDTIILAGAEYSGSSR.D           |
| 825 - 839   | 1557.5818 | 1556.5745 | 1556.7067 | -85 | 0    | K.SGEDADTLGLTGHHER.Y              |
| 866 - 872   | 870.4208  | 869.4135  | 869.4066  | 8   | 0    | K.SFTCTVR.F                       |

Spot No.: **33**

Mascot score: **93**    Sequence coverage %: **12**

NCBI accession No.: **gi| 15232704**

Matched peptides No.: **12**

Total peptides No.: **24**

Calculated Mr: **95499**

Calculated pI: **5.79**

### Annotated PMF spectra:

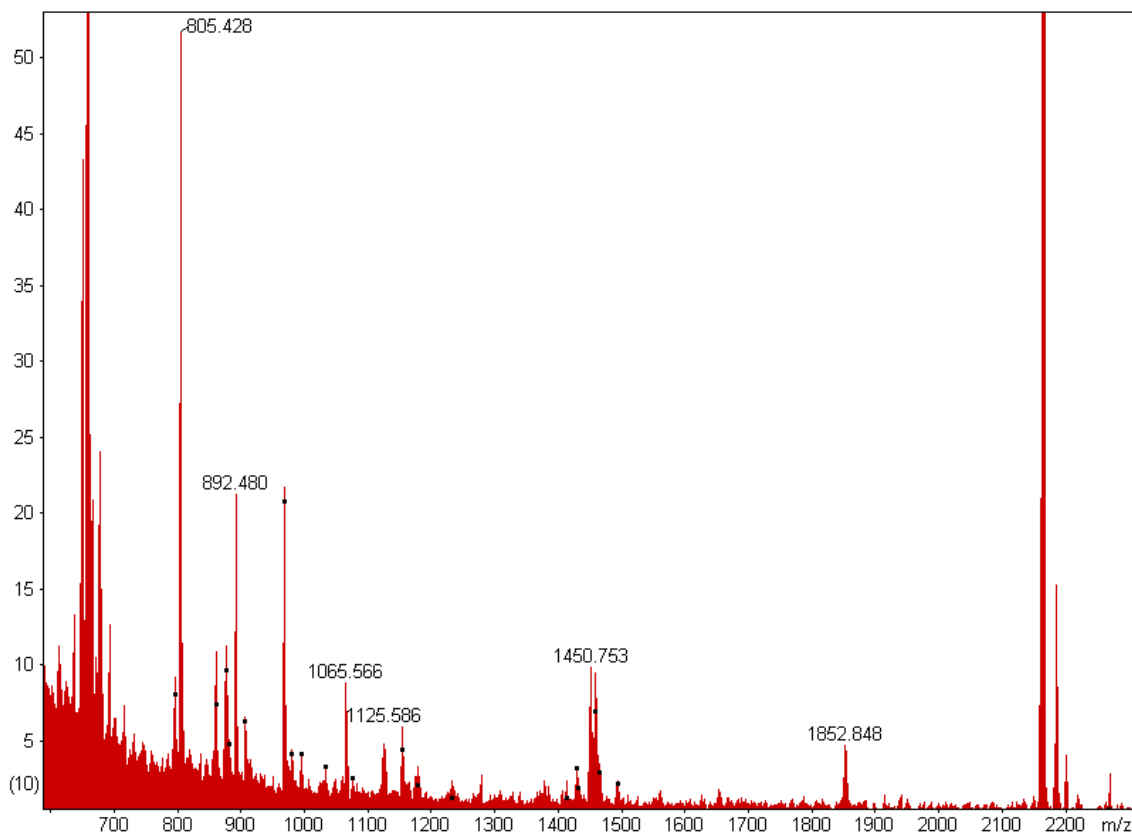

### Probability Based Mowse Score:

Protein score is  $-10 \cdot \log(P)$ , where P is the probability that the observed match is a random event. Protein scores greater than 72 are significant ( $p < 0.05$ ).

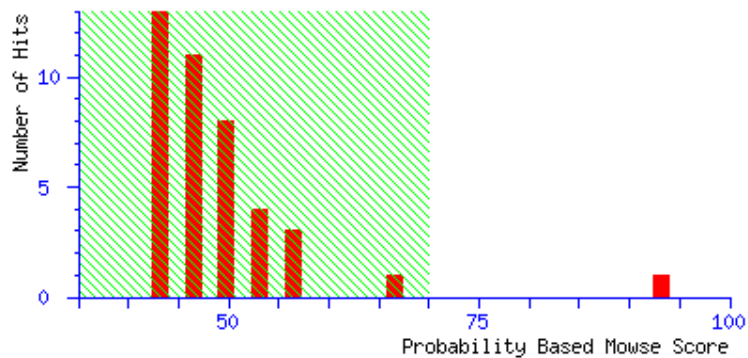

## Matched peptide sequences: shown in **Bold Red**

**1** MANANGKAAT SLPEKISAKA NPEADDATEI AGNIVYHAKY **SPHF**SPLKFG  
**51** PEQALYATAE SLRDRLIQLW NETYVHFNKV DPKQTYYSLSM EYLQGRALTN  
**101** AIGNLNLQGP YADALRTLGY ELEELAEQEK DAALGNGGLG RLASCFLDSM  
**151** ATLNLPANGY GLRYRHGLFK QIITKKGQEE IPEDWLEKFS **PWEIVRHVV**  
**201** **FPVRF**GK**VQ** **VNP**DGS**R**KWV DGDVVQALAY DVPIPGYGTK NTISLRLWEA  
**251** KARAEDLDF QFNEGEYELA AQLHSRAQQI CTVLYPGDAT ENGKLLRLKQ  
**301** QFFLCSASLQ DIISRFHERS TTEGSRKWSE FPSKVAVQMN DTHPTLAIPE  
**351** LMRLLMDDNG LGWDEAWDVT SKTVAYTNHT VLPEALEKWS **QSLM**WKL**LP**R  
**401** **HMEI**IEE**IDK** **RFV**QTIRDTR VDLEDKISSL SILDNNPQKP VVRMANLCVV  
**451** SSVTVNGVAQ LHSDILKAEL FADYVSIWPN KFQNKTINGIT PRRWLRFCSP  
**501** ELSDIITKWL KTDKWITDLD LLTGLR**QFAD** **NEEL**Q**SEWAS** **AKT**ANK**KRLA**  
**551** **QYIER**VTGVS IDPTSLFDIQ VKRIHEYKRO LMNILGVVYR FKCLKEMKPE  
**601** ERKKTVPRTV MIGGKAFATY TNAKRIVKLV NDVGDVVNSD PEVNEYLKVV  
**651** FVPNYNVTVA EMLIPGSELS QHISTAGMEA SGTSNMKFAL NGCLIIIGTLD  
**701** GANVEIREEV GEENFFLFGA TADQVPLRK **ERED**GL**FKPD** **PRFEEAKQFV**  
**751** **KSGV**FGSYDY GPLLDSLEGN TGFGRGDYFL VGYDFPSYMD AQAK**VDEAYK**  
**801** **DRK**GWLKMSI LSTAGSGKFS SDRTIAQYAK EIWNIEACPV P

## Matched peptides information:

| Start - End | Observed  | Mr(expt)  | Mr(calc)  | ppm | Miss | Sequence                      |
|-------------|-----------|-----------|-----------|-----|------|-------------------------------|
| 40 - 48     | 1075.5512 | 1074.5439 | 1074.5498 | -5  | 0    | K.YSPHFSPLK.F                 |
| 189 - 196   | 1033.5047 | 1032.4974 | 1032.5393 | -41 | 0    | K.FSPWEIVR.H                  |
| 197 - 204   | 968.5232  | 967.5159  | 967.5240  | -8  | 0    | R.HDVVFPVR.F                  |
| 205 - 217   | 1450.7534 | 1449.7461 | 1449.7365 | 7   | 1    | R.FFGKVQVNPDGSR.K             |
| 389 - 396   | 1065.5662 | 1064.5589 | 1064.5113 | 45  | 0    | K.WSQSLMWK.L                  |
| 401 - 411   | 1412.7476 | 1411.7403 | 1411.7129 | 19  | 1    | R.HMEIIEEIDKR.F               |
| 401 - 411   | 1428.7167 | 1427.7094 | 1427.7078 | 1   | 1    | R.HMEIIEEIDKR.F Oxidation (M) |
| 527 - 542   | 1852.8476 | 1851.8403 | 1851.8275 | 7   | 0    | R.QFADNEELQSEWASAK.T          |
| 549 - 555   | 892.4796  | 891.4723  | 891.4814  | -10 | 0    | R.LAQYIER.V                   |
| 731 - 742   | 1458.7519 | 1457.7446 | 1457.7263 | 13  | 1    | K.EREDGLFKPDR.F               |
| 743 - 751   | 1125.5863 | 1124.5790 | 1124.5866 | -7  | 1    | R.FEEAKQFVK.S                 |
| 795 - 802   | 995.5436  | 994.5364  | 994.4720  | 65  | 1    | K.VDEAYKDR.K                  |

Spot No.: **34**

Mascot score: **240** Sequence coverage %: **49**

NCBI accession No.: **gi| 4185573**

Matched peptides No.: **35**

Total peptides No.: **84**

Calculated Mr: **52905**

Calculated pI: **6.09**

### Annotated PMF spectra:

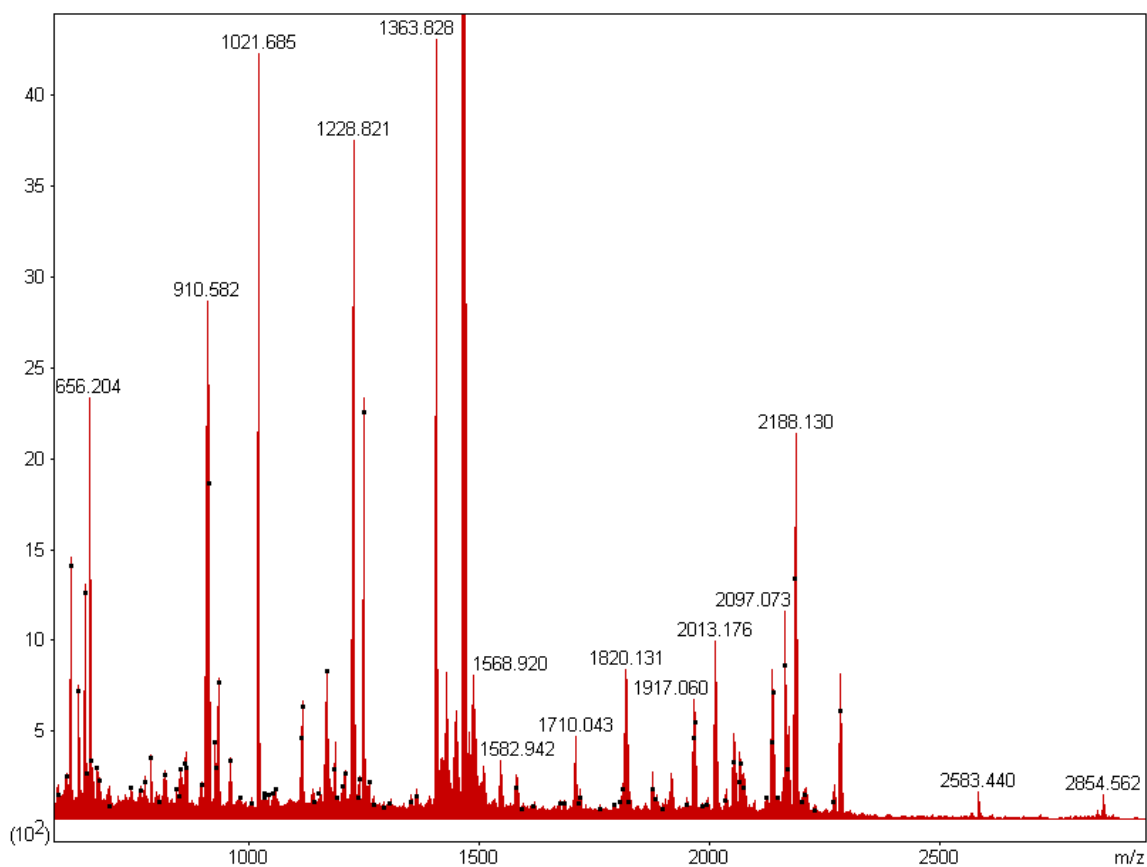

### Probability Based Mowse Score:

Protein score is  $-10 \cdot \log(P)$ , where P is the probability that the observed match is a random event. Protein scores greater than 72 are significant ( $p < 0.05$ ).

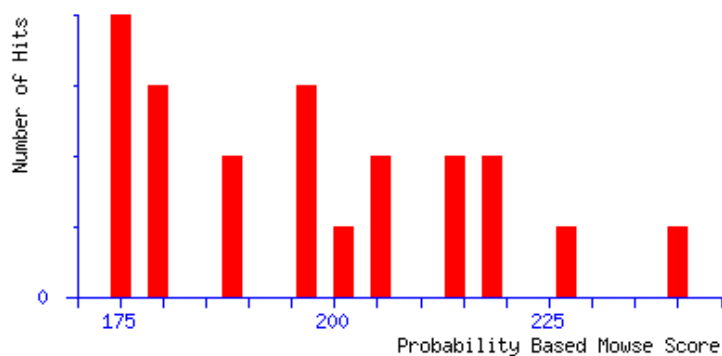

Matched peptide sequences: shown in **Bold Red**

1 SVGFKAGVKE **YKLTYYTPEY ETKDIDLAA FRVTPQPGVP** PEEAGAAVAA  
 51 ESSTGTWTTV WTDGLTSLDR YKGRCYGIEP VPGEENQYIA YVAYPLDLFE  
 101 EGSVTNMFST IVGNVFGFKA LRALR**LEDLR IPPAYTKTFQ GPPHGIQVER**  
 151 DKLNKYGRPL LGCTIKPK**LG LSAKNYGRAV YECLRGGLDF TKDDENVNSQ**  
 201 **PFMRWRDRFL FCAEAIYKSQ AETGEIKGHY LNATAGTCEE MIKRAVFARE**  
 251 LGVPIVMHDY LTGGFTANTS LAHYCR**DNGL LLHIHRAMHA VIDRQKNHGM**  
 301 **HFRVLAkALR LSGGDHIHAG TVVGKLEGDR ESTLGFVDLL RDDYIEKDRS**  
 351 RGIFFTQDWV SLPGVLPVAS GGIHVWHMPA LTEIFGDDSV LQFGGGTLGH  
 401 PWNAPGAVA **NRVALEACVQ ARNEGRDLAV EGNEIIRQAS KWSPELAAAC**  
 451 **EVWKEIKFNF PTIDKLDGPV EKFD**

Matched peptides information:

| Start - End | Observed  | Mr(expt)  | Mr(calc)  | ppm | Miss | Sequence                              |
|-------------|-----------|-----------|-----------|-----|------|---------------------------------------|
| 13 - 23     | 1407.8276 | 1406.8203 | 1406.6605 | 114 | 0    | K.LTYYTPEYETK.D                       |
| 24 - 32     | 1021.6846 | 1020.6773 | 1020.5240 | 150 | 0    | K.DTDLAAFR.V                          |
| 126 - 130   | 645.4636  | 644.4564  | 644.3493  | 166 | 0    | R.LEDLR.I                             |
| 131 - 137   | 789.5590  | 788.5518  | 788.4432  | 138 | 0    | R.IPPAYTK.T                           |
| 138 - 150   | 1465.9258 | 1464.9185 | 1464.7474 | 117 | 0    | K.TFQGPPHGIQVER.D                     |
| 169 - 174   | 588.3708  | 587.3635  | 587.3642  | -1  | 0    | K.LGLSAK.N                            |
| 179 - 185   | 910.5820  | 909.5747  | 909.4378  | 151 | 0    | R.AVYECLR.G                           |
| 186 - 204   | 2170.1317 | 2169.1244 | 2168.9797 | 67  | 1    | R.GGLDFTKDDENVNSQPFMR.W               |
| 186 - 204   | 2186.1797 | 2185.1724 | 2184.9746 | 91  | 1    | R.GGLDFTKDDENVNSQPFMR.W Oxidation (M) |
| 193 - 204   | 1451.8062 | 1450.7989 | 1450.6147 | 127 | 0    | K.DDENVNSQPFMR.W                      |
| 193 - 204   | 1467.9284 | 1466.9211 | 1466.6096 | 212 | 0    | K.DDENVNSQPFMR.W Oxidation (M)        |
| 205 - 208   | 632.4389  | 631.4316  | 631.3190  | 178 | 1    | R.WRDR.F                              |
| 207 - 218   | 1532.9169 | 1531.9096 | 1531.7493 | 105 | 1    | R.DRFLFCAEAIYK.S                      |
| 219 - 227   | 962.5972  | 961.5900  | 961.4716  | 123 | 0    | K.SQAETGEIK.G                         |
| 228 - 243   | 1794.9681 | 1793.9608 | 1793.8076 | 85  | 0    | K.GHYLNATAGTCEEMIK.R                  |
| 228 - 243   | 1810.9898 | 1809.9825 | 1809.8026 | 99  | 0    | K.GHYLNATAGTCEEMIK.R Oxidation (M)    |
| 228 - 244   | 1951.0861 | 1950.0788 | 1949.9087 | 87  | 1    | K.GHYLNATAGTCEEMIKR.A                 |
| 228 - 244   | 1967.0834 | 1966.0761 | 1965.9037 | 88  | 1    | K.GHYLNATAGTCEEMIKR.A Oxidation (M)   |
| 277 - 286   | 1187.7962 | 1186.7889 | 1186.6571 | 111 | 0    | R.DNGLLLHIHR.A                        |
| 277 - 294   | 2097.0733 | 2096.0660 | 2096.1061 | -19 | 1    | R.DNGLLLHIHRAMHAVIDR.Q Oxidation (M)  |
| 287 - 294   | 928.5763  | 927.5690  | 927.4596  | 118 | 0    | R.AMHAVIDR.Q Oxidation (M)            |
| 295 - 303   | 1170.7667 | 1169.7594 | 1169.5512 | 178 | 1    | R.QKNHGMR.F Oxidation (M)             |
| 297 - 303   | 898.5480  | 897.5408  | 897.4028  | 154 | 0    | K.NHGMHFR.V                           |
| 297 - 303   | 914.5433  | 913.5360  | 913.3977  | 151 | 0    | K.NHGMHFR.V Oxidation (M)             |
| 311 - 325   | 1447.9045 | 1446.8972 | 1446.7579 | 96  | 0    | R.LSGGDHIHAGTVVGK.L                   |
| 326 - 341   | 1820.1308 | 1819.1235 | 1818.9476 | 97  | 1    | K.LEGDRESTLGFVDLLR.D                  |
| 331 - 341   | 1249.8438 | 1248.8365 | 1248.6714 | 132 | 0    | R.ESTLGFVDLLR.D                       |
| 331 - 347   | 2013.1758 | 2012.1685 | 2012.0102 | 79  | 1    | R.ESTLGFVDLLRDDYIEK.D                 |
| 342 - 349   | 1053.6599 | 1052.6526 | 1052.4774 | 166 | 1    | R.DDYIEKDR.S                          |
| 413 - 422   | 1116.7421 | 1115.7348 | 1115.5757 | 143 | 0    | R.VALEACVQAR.N                        |
| 427 - 437   | 1228.8210 | 1227.8137 | 1227.6459 | 137 | 0    | R.DLAVEGNEIIR.Q                       |
| 442 - 454   | 1546.9133 | 1545.9060 | 1545.7286 | 115 | 0    | K.WSPELAAACEVWK.E                     |
| 442 - 457   | 1917.0601 | 1916.0528 | 1915.9502 | 54  | 1    | K.WSPELAAACEVWKEIK.F                  |
| 458 - 465   | 981.6087  | 980.6014  | 980.4967  | 107 | 0    | K.FNFPTIDK.L                          |
| 458 - 472   | 1719.9905 | 1718.9832 | 1718.8879 | 55  | 1    | K.FNFPTIDKLDGPVEK.F                   |

Spot No.: **35**

Mascot score: **87**      Sequence coverage %: **27**

NCBI accession No.: **gi| 15226573**

Matched peptides No.: **19**      Total peptides No.: **108**

Calculated Mr: **65977**      Calculated pI: **5.95**

### Annotated PMF spectra:

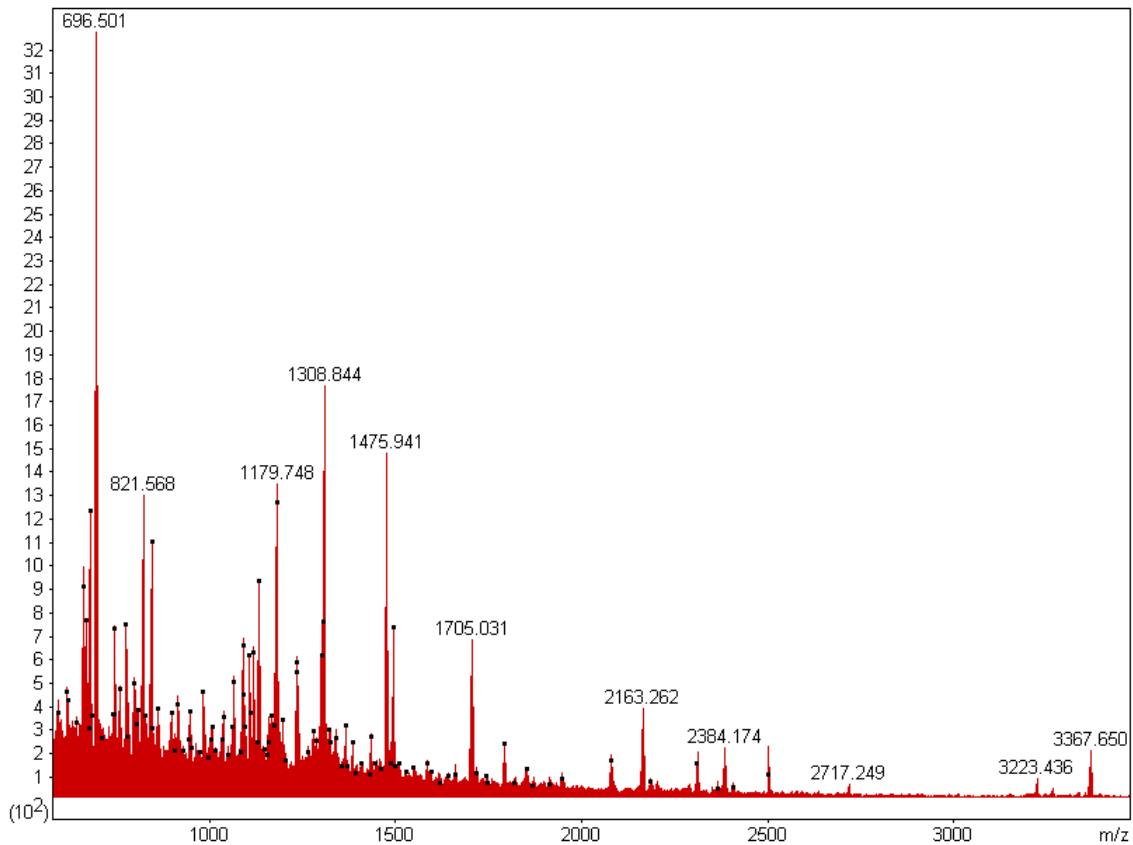

### Probability Based Mowse Score:

Protein score is  $-10 \cdot \log(P)$ , where P is the probability that the observed match is a random event. Protein scores greater than 72 are significant ( $p < 0.05$ ).

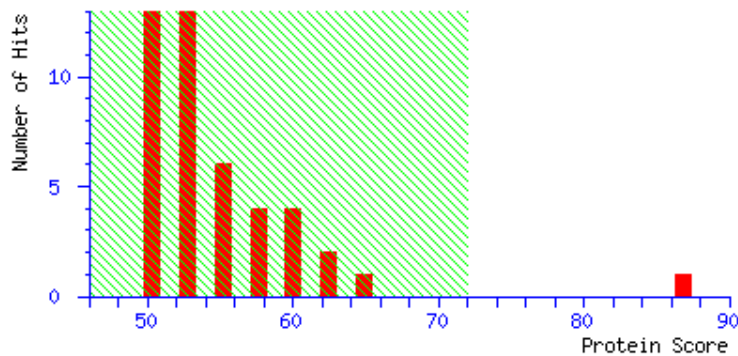

## Matched peptide sequences: shown in **Bold Red**

```

1  MTSFSLIFTS  PLLPSSSTKP  KRSVLVAAAQ  TTAPAESTAS  VDADRLEPRV
51  ELKDGFFILK  EKFRKGINPQ  EKVKIEREPM  KLFMENGIEE  LAKKSMEELD
101 SEKSSKDDID  VRLKWLGLFH  RRKHQYGKFM  MRLKLPNGVT  TSAQTRYLAS
151 VIRKYGEDGC  ADVTTRQNWQ  IRGVVLPDVP  EILKGLASVG  LTSLQSGMDN
201 VRNPVGNPIA  GIDPEEIVDT  RPYTNLLSQF  ITANSQGNPD  FTNLPRKWNV
251 CVVGTHDLYE  HPHINDLAYM  PANKDGRFGF  NLLVGGFFSP  KRCEEAIPLD
301 AWPVADDVLP  LCKAVLEAYR  DLGTRGNRQK  TRMMWLIDEL  GVEGFRTEVE
351 KRMPNGKLER  GSSEDLVNKQ  WERRDYFGVN  PQKQEGLSFV  GLHVPVGRQLQ
401 ADDMDELARL  ADTYGSGELR  LTVEQNIIIP  NVETSKTEAL  LQEPFLKNRF
451 SPEPSILMKG  LVACTGSQFC  GQAI IETKLR  ALKVTEEVER  LVSVPRPIRM
501 HWTGCPNTCG  QVQVADIGFM  GCLTRGEEGK  PVEGADVYVG  GRIGSDSHIG
551 EIYKKGVRVT  ELVPLVAEIL  IKEFGAVPRE  REENED

```

## Matched peptides information:

| Start - End | Observed  | Mr (expt) | Mr (calc) | ppm | Miss | Sequence                       |
|-------------|-----------|-----------|-----------|-----|------|--------------------------------|
| 50 - 60     | 1308.8436 | 1307.8363 | 1307.7489 | 67  | 1    | R.VELKDGFFILK.E                |
| 82 - 93     | 1393.8655 | 1392.8582 | 1392.6959 | 117 | 0    | K.LFMENGIEELAK.K               |
| 95 - 106    | 1369.8211 | 1368.8138 | 1368.6078 | 151 | 1    | K.SMEELDSEKSSK.D               |
| 107 - 114   | 973.6221  | 972.6148  | 972.5240  | 93  | 1    | K.DDIDVRLK.W                   |
| 129 - 132   | 616.3488  | 615.3415  | 615.2509  | 147 | 0    | K.FMMR.L 2 Oxidation (M)       |
| 147 - 153   | 821.5679  | 820.5606  | 820.4807  | 97  | 0    | R.YLASVIR.K                    |
| 167 - 172   | 844.5436  | 843.5363  | 843.4351  | 120 | 0    | R.QNWQIR.G                     |
| 173 - 184   | 1278.8376 | 1277.8303 | 1277.7595 | 55  | 0    | R.GVVLPDVPEILK.G               |
| 361 - 369   | 948.5732  | 947.5659  | 947.4560  | 116 | 0    | R.GSSEDLVNK.Q                  |
| 370 - 373   | 618.3565  | 617.3492  | 617.2921  | 92  | 0    | K.QWER.R                       |
| 384 - 398   | 1595.0328 | 1594.0255 | 1593.8627 | 102 | 0    | K.QEGLSFVGLHVPVGR.L            |
| 410 - 420   | 1181.7271 | 1180.7198 | 1180.5724 | 125 | 0    | R.LADTYGSGELR.L                |
| 448 - 459   | 1434.9070 | 1433.8997 | 1433.7337 | 116 | 1    | K.NRFSPEPSILMK.G Oxidation (M) |
| 481 - 490   | 1173.7525 | 1172.7452 | 1172.6401 | 90  | 1    | R.ALKVTEEVER.L                 |
| 484 - 490   | 861.5284  | 860.5211  | 860.4239  | 113 | 0    | K.VTEEVER.L                    |
| 491 - 499   | 1036.6694 | 1035.6621 | 1035.6553 | 7   | 0    | R.LVSVPRPIR.M                  |
| 543 - 555   | 1446.9082 | 1445.9009 | 1445.7514 | 103 | 1    | R.IGSDSHIGEIYKK.G              |
| 573 - 579   | 775.5068  | 774.4995  | 774.4024  | 125 | 0    | K.EFGAVPR.E                    |
| 573 - 581   | 1060.6825 | 1059.6752 | 1059.5461 | 122 | 1    | K.EFGAVPRER.E                  |

Spot No.: **36**

Mascot score: **107**    Sequence coverage %: **15**

NCBI accession No.: **gi| 15233349**

Matched peptides No.: **15**

Total peptides No.: **29**

Calculated Mr: **98774**

Calculated pI: **5.98**

### Annotated PMF spectra:

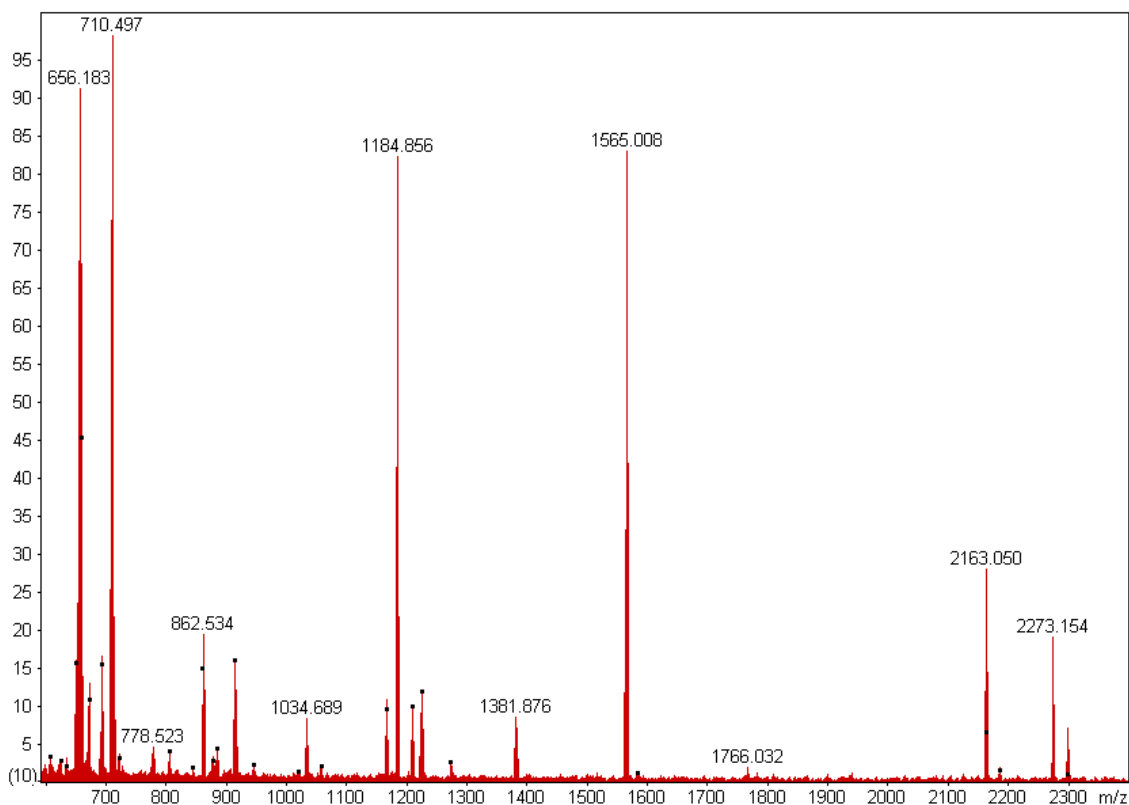

### Probability Based Mowse Score:

Protein score is  $-10 \cdot \log(P)$ , where P is the probability that the observed match is a random event. Protein scores greater than 72 are significant ( $p < 0.05$ ).

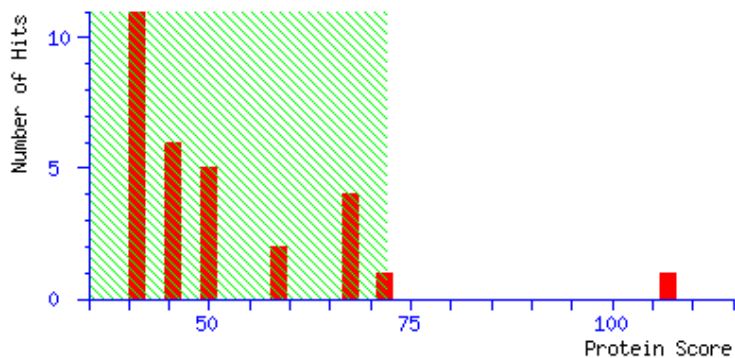



Matched peptide sequences: shown in **Bold Red**

```

1  MASENPFRSI LKALEKPDGG EFGNYYSLPA LNDPRIDKLP YSIRILLESA
51 IRNCDEFQVK SKDVEKILDW ENTSPKQVEI PFKPARVLLQ DFTGVP AVVD
101 LACMRDAMWN LGGDSNKINP LVPVDLVIDH SVQVDVARSE NAVQANMELE
151 FQRNKERFAF LKWGSNAFHN MLVVPPGSGI VHQVNLEYLA RVVFNTNGLL
201 YPDSVVGTDG HTTMIDGLGV AGWGVGGIEA EATMLGQPMS MVLPGVVGFK
251 LTGKLRDGMT ATDLVLTVTQ MLRKHGVVVGK FVEFHGEGMR ELSLADRATI
301 ANMSPEYGAT MGFFPVDHVT LQYLRLTGRS DDTVSMIEAY LRANKMFPVDY
351 SEPESKTVYS SCLELNLEDV EPCVSGPKRP HDRVPLKEMK ADWHSCLDNR
401 VGFKGFVAVPK EAQSKAVEFN FNGTTAQLRH GDVVIAAITS CTNTSNPSVM
451 LGAALVAKKA CDLGLEVKPW IKTSLAPGSG VVTKYLAKSG LQKYLNLQGF
501 SIVGYGCTTC IGNSGDIHEA VASAIVDNDL VASAVLSGMR NFEGRVHPLT
551 RANYLASPPL VVAYALAGTV DIDFETQPIG TGKDGKQIFF RDIWPSNKEV
601 AEVVQSSVLP DMFKATYEAI TKGNSMWNQL SVASGTLYEW DPKSTYIHEP
651 PYFKGMTMSP PGPHGVKDAY CLLNFGDSIT TDHISPAGSI HKDSPA AKYL
701 MERGVDRRDF NSYGSRRGND EIMARGTFAN IRIVNKHLKG EVGPKTVHIP
751 TGEKLSVFDA AMKYRNEGRD TIILAGAEYG SGSSRDWAAK GPMLLGVKAV
801 ISKSFERIHR SNLVGMGIIP LCFKAGEDAE TLGLTGQELY TIELPNMVSE
851 IKPGQDVTVV TNNGKSFTCT LRFDTEVELA YFDHGGILQY VIRNLIKQ

```

Matched peptides information:

| Start - End | Observed  | Mr(expt)  | Mr(calc)  | ppm | Miss | Sequence                         |
|-------------|-----------|-----------|-----------|-----|------|----------------------------------|
| 45 - 52     | 914.6920  | 913.6847  | 913.5596  | 137 | 0    | R.ILLESAIR.N                     |
| 77 - 86     | 1184.8555 | 1183.8482 | 1183.6713 | 149 | 1    | K.QVEIPFKPAR.V                   |
| 118 - 138   | 2298.4311 | 2297.4238 | 2297.2744 | 65  | 0    | K.INPLVPVDLVIDHSVQVDVAR.S        |
| 139 - 153   | 1766.0324 | 1765.0251 | 1764.8101 | 122 | 0    | R.SENAVQANMELEFQR.N              |
| 158 - 162   | 625.4351  | 624.4278  | 624.3635  | 103 | 0    | R.FAFLK.W                        |
| 281 - 290   | 1208.7385 | 1207.7312 | 1207.5444 | 155 | 0    | K.FVEFHGEGMR.E                   |
| 281 - 290   | 1224.7334 | 1223.7261 | 1223.5394 | 153 | 0    | K.FVEFHGEGMR.E Oxidation (M)     |
| 391 - 400   | 1273.7167 | 1272.7094 | 1272.5306 | 141 | 0    | K.ADWHSCLDNR.V                   |
| 546 - 551   | 722.5221  | 721.5148  | 721.4235  | 127 | 0    | R.VHPLTR.A                       |
| 587 - 591   | 710.4967  | 709.4894  | 709.3911  | 139 | 0    | K.QIFFR.D                        |
| 644 - 654   | 1381.8761 | 1380.8688 | 1380.6714 | 143 | 0    | K.STYIHEPPYFK.G                  |
| 709 - 716   | 945.4997  | 944.4925  | 944.3988  | 99  | 0    | R.DFNSYGSR.R                     |
| 726 - 732   | 778.5226  | 777.5154  | 777.4133  | 131 | 0    | R.GTFANIR.I                      |
| 811 - 824   | 1565.0082 | 1564.0009 | 1563.8153 | 119 | 0    | R.SNLVGMGIIPLCFK.A Oxidation (M) |
| 866 - 872   | 884.5604  | 883.5532  | 883.4222  | 148 | 0    | K.SFTCTLR.F                      |

Spot No.: **37**

Mascot score: **94**    Sequence coverage %: **19**

NCBI accession No.: **gi| 14596025**

Matched peptides No.: **20**

Total peptides No.: **55**

Calculated Mr: **113852**

Calculated pI: **6.51**

### Annotated PMF spectra:

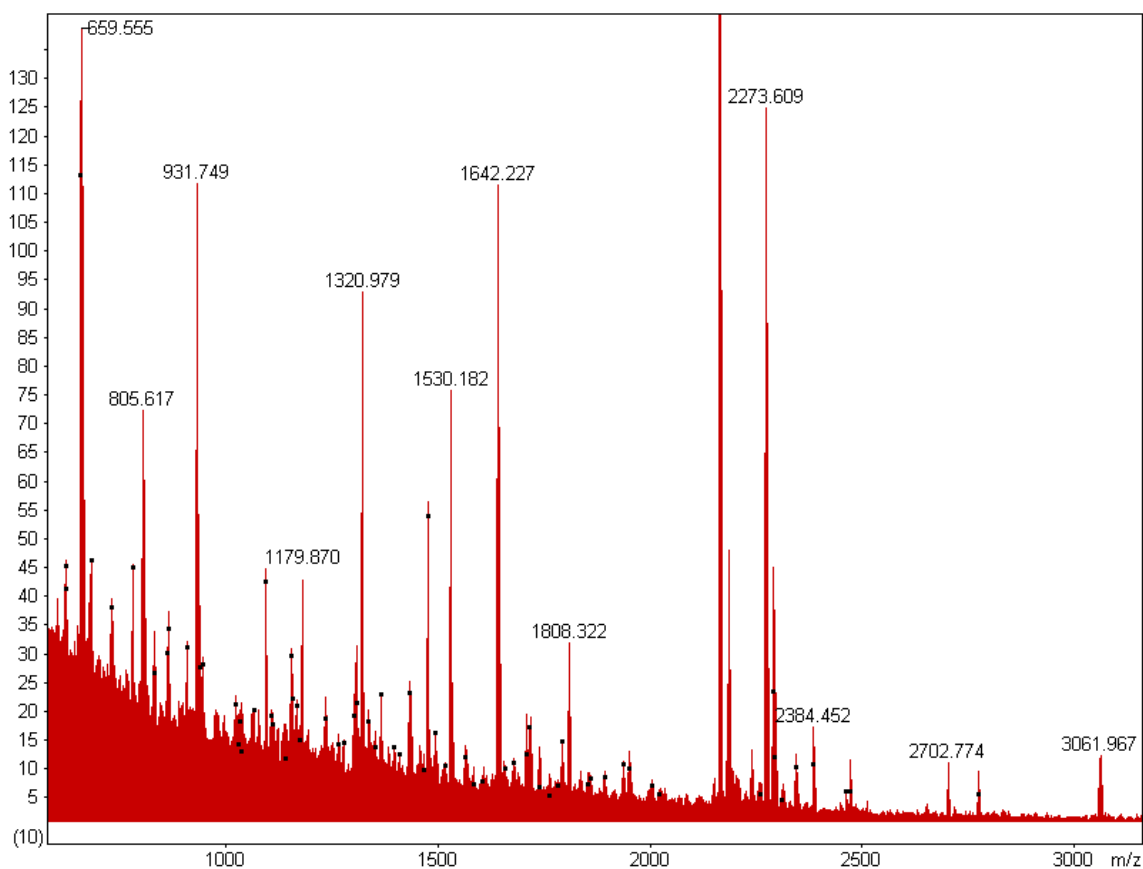

### Probability Based Mowse Score:

Protein score is  $-10 \cdot \log(P)$ , where P is the probability that the observed match is a random event. Protein scores greater than 72 are significant ( $p < 0.05$ ).

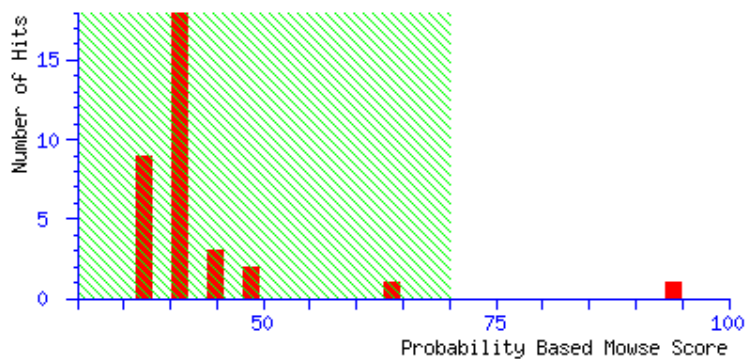

Matched peptide sequences: shown in **Bold Red**

```

1 MERARRLAYR GIVKRLVNDT KRHRNAETPH LVPHAPARYV SSSLSPFISTP
51 RSVNHATAAFG RHQQTRRSISV DAVKPSDTFP RRHNSATPDE QTHMAKFCGF
101 DHIDSLIDAT VPKSIRLDSM KFSKFDAGLT ESQMIQHMVD LASKNKVFKS
151 FIGMGYYNTH VPTVILRNIM ENPAWYTQYT PYQAEISQGR LESLLNFQTV
201 ITDLTGLPMS NASLLDEGTA AAEAMAMCNN ILKGKKKTFV IASNCHPQTI
251 DVCKTRADGF DLKVVTSDLK DIDYSSGDVC GVLVQYPGTE GEVLDYAEFV
301 KNAHANGVKV VMAIDLALALT VLKPPGEFGA DIVVGSQRF GVPMGYGGPH
351 AAFLATSQEY KRMPGRIIG ISVDSSGKQA LRMAMQTREQ HIRRDKATSN
401 ICTAQALLAN MAAMYAVYHG PAGLKSIAQR VHGLAGIFSL GLNKLGVAEV
451 QELPFFDTVK IKCSDAHAIA DAASKSEINL RVVDSTTITA SFDETTTLLDD
501 VDKLFKVFAS GKPVPTAES LAPEVQNSIP SSSLTRESPYL THPIFNMYHT
551 EHELLRYIHK LQSKDLSLCH SMIPLGSTM KLNATTEMPP VTWPSFTDIH
601 PFAPVEQAQG YQEMFENLGD LLCTITGFDS FSLQPNAGAA GEYAGLMVIR
651 AYHMSRGDHH RNVCIIPVSA HGTNPASAAM CGMKIITVGT DAKGNINIEE
701 VRKAAEANKD NLAALMVYYP STHGVYEEGI DEICNIIHEN GGQVYMDGAN
751 MNAQVGLTSP GFIGADVCHL NLHKTFCIPH GGGGPGMGPI GVKNHLAPFL
801 PSHFVIPTGG IPQPEKTAPL GAISAAPWGS ALILPISYTY IAMMGSGLT
851 DASKIAILNA NYMAKRLEKH YPVLFRGVNG TVAHEFIIDL RGFKNTAGIE
901 PEDVAKRLMD YGFHGPMSW PVPGLMIEP TESESKAELD RFCDALISIR
951 EEIAQIEKGN ADVQNNVLKG APHPPSLLMA DTWKKPYSRE YAAFPAPWLR
1001 SSKFWPTTGR VDNVYGDRKL VCTLLPEEQ VTAAVSA

```

Matched peptides information:

| Start - End | Observed  | Mr (expt) | Mr (calc) | ppm  | Miss | Sequence                                         |
|-------------|-----------|-----------|-----------|------|------|--------------------------------------------------|
| 82 - 96     | 1739.1921 | 1738.1848 | 1737.7853 | 230  | 1    | R.RHNSATPDE <b>QTHMAK.F</b> Oxidation (M)        |
| 83 - 96     | 1583.1333 | 1582.1260 | 1581.6842 | 279  | 0    | R.HNSATPDE <b>QTHMAK.F</b> Oxidation (M)         |
| 125 - 146   | 2462.7650 | 2461.7577 | 2462.1934 | -177 | 1    | K.FDAGLT <b>ESQMIQHMVDLASKNK.V</b>               |
| 255 - 263   | 1022.7491 | 1021.7418 | 1021.5193 | 218  | 1    | K. <b>TRADGF</b> DLK.V                           |
| 340 - 361   | 2344.5557 | 2343.5484 | 2343.0994 | 192  | 0    | R.FG <b>VPMGYGGPHAAFLATSQEYK.R</b> Oxidation (M) |
| 363 - 367   | 623.4294  | 622.4221  | 622.2567  | 266  | 0    | R. <b>MMPGR.I</b> 2 Oxidation (M)                |
| 363 - 378   | 1680.2103 | 1679.2030 | 1678.8382 | 217  | 1    | R. <b>MMPGRIIGISVDSSGK.Q</b> 2 Oxidation (M)     |
| 389 - 393   | 682.5155  | 681.5082  | 681.3558  | 224  | 0    | R. <b>EQHIR.R</b>                                |
| 445 - 460   | 1792.1327 | 1791.1254 | 1790.9455 | 100  | 0    | K.LGV <b>AEVQELPFFDTVK.I</b>                     |
| 476 - 481   | 731.5769  | 730.5697  | 730.3973  | 236  | 0    | K. <b>SEINL.V</b>                                |
| 651 - 656   | 780.5345  | 779.5272  | 779.3384  | 242  | 0    | R. <b>AYHMSR.G</b> Oxidation (M)                 |
| 657 - 661   | 621.4541  | 620.4468  | 620.2779  | 272  | 0    | R. <b>GDHHR.N</b>                                |
| 662 - 684   | 2386.6096 | 2385.6023 | 2385.1062 | 208  | 0    | R. <b>NVCIIPVSAHGTNPASAAMCGMK.I</b>              |
| 775 - 793   | 1855.2809 | 1854.2736 | 1853.8917 | 206  | 0    | K. <b>TFCIPHGGGPGMGPIGVK.N</b> Oxidation (M)     |
| 870 - 876   | 931.7489  | 930.7417  | 930.5076  | 252  | 0    | K. <b>HYPVLF</b> .G                              |
| 942 - 950   | 1094.8137 | 1093.8064 | 1093.5590 | 226  | 0    | R. <b>FCDALISIR.E</b>                            |
| 990 - 1000  | 1320.9786 | 1319.9713 | 1319.6662 | 231  | 0    | R. <b>EYAAF</b> PAPWLR.S                         |
| 1004 - 1010 | 864.6285  | 863.6213  | 863.4290  | 223  | 0    | K. <b>FWPTTGR.V</b>                              |
| 1011 - 1018 | 937.6605  | 936.6532  | 936.4301  | 238  | 0    | R. <b>VDNVY</b> DRK.K                            |
| 1011 - 1019 | 1065.7593 | 1064.7520 | 1064.5251 | 213  | 1    | R. <b>VDNVY</b> DRK.L                            |

Spot No.: **38**

Mascot score: **103**

Sequence coverage %: **51**

NCBI accession No.: **gi| 312281703**

Matched peptides No.: **14**

Total peptides No.: **70**

Calculated Mr: **38065**

Calculated pI: **5.48**

### Annotated PMF spectra:

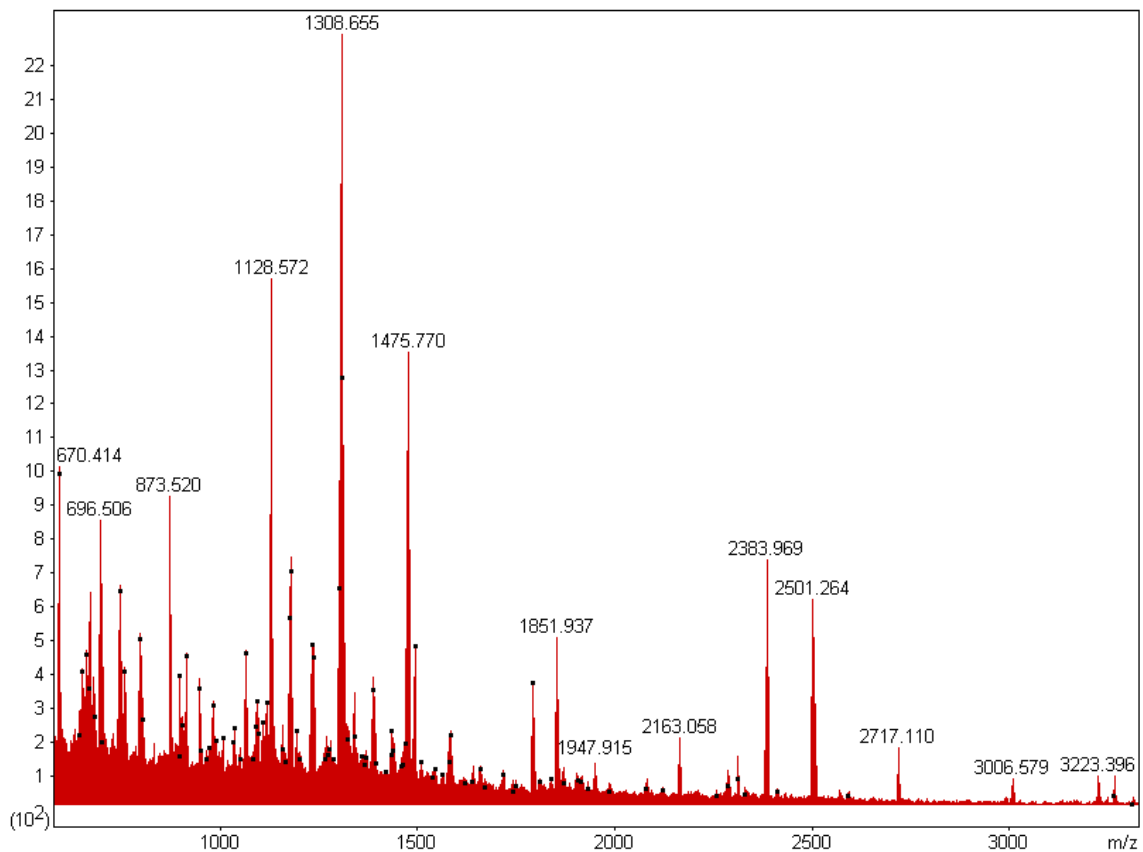

### Probability Based Mowse Score:

Protein score is  $-10 \cdot \log(P)$ , where P is the probability that the observed match is a random event. Protein scores greater than 72 are significant ( $p < 0.05$ ).

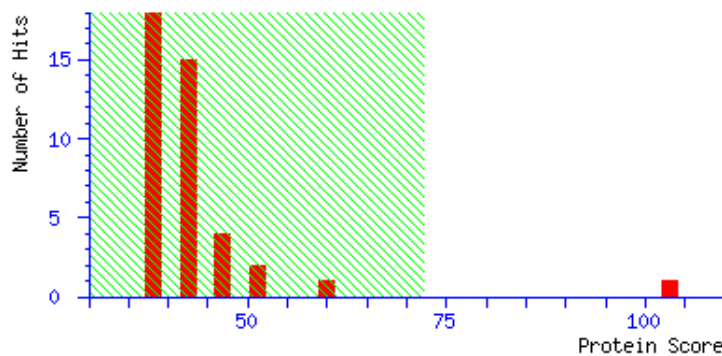

Matched peptide sequences: shown in **Bold Red**

```

1 MDLRFLASLT ILLGLFFVNS HTAAGQQVGV CYGRYGDNLP SPAETIELFK
51 QKNIRRVRLY SPDHDVLAAL RGSDIEVMLG LPNQDLQRIA SSQSEADTWV
101 QNNVNNYVDD VKFRYVSVGN EVKIFDSYSQ FLVPAMENID RAVLGSGLGG
151 RIKVSTAIDM GVLGESYPPS KGSFKGEVMV LMEPIIRFLV NKKSPLHLNL
201 YTYFSYAGNP DQIRLDYALF TASPGTVSDP PRSYQNLFDA MLDAVHSALE
251 RSGGESLDVV VSETGWPTEG GTETNLENAR IYSNNLINHV KNGTPKRPGK
301 EIETYLFAMY DENKKPTPPD VEKFWGLFHP NKQPKYEVNF G

```

Matched peptides information:

| Start - End | Observed  | Mr (expt) | Mr (calc) | ppm | Miss | Sequence                                                                                                  |
|-------------|-----------|-----------|-----------|-----|------|-----------------------------------------------------------------------------------------------------------|
| 35 - 50     | 1793.8150 | 1792.8077 | 1792.8883 | -45 | 0    | R.YGDNL <b>P</b> SPAETIE <b>L</b> FK.Q                                                                    |
| 59 - 71     | 1469.7564 | 1468.7491 | 1468.7674 | -12 | 0    | R.LY <b>S</b> PDHDVLAALR.G                                                                                |
| 72 - 88     | 1900.9030 | 1899.8957 | 1899.9360 | -21 | 0    | R.GSDIEV <b>MLG</b> LPNQDLQ <b>R</b> .I Oxidation (M)                                                     |
| 115 - 123   | 994.5064  | 993.4991  | 993.5131  | -14 | 0    | R.YVSVGNE <b>VK</b> .I                                                                                    |
| 124 - 141   | 2161.0110 | 2160.0037 | 2160.0197 | -7  | 0    | K.IFDS <b>YSQ</b> FLVPAMENID <b>R</b> .A Oxidation (M)                                                    |
| 142 - 151   | 886.5640  | 885.5568  | 885.5032  | 60  | 0    | R.AVLG <b>S</b> GLG <b>R</b> .I                                                                           |
| 154 - 171   | 1866.8517 | 1865.8444 | 1865.9081 | -34 | 0    | K.VST <b>AI</b> DM <b>G</b> V <b>L</b> GES <b>Y</b> PP <b>S</b> K.G Oxidation (M)                         |
| 172 - 187   | 1837.8761 | 1836.8688 | 1836.9478 | -43 | 1    | K.G <b>S</b> FK <b>GE</b> VM <b>V</b> L <b>M</b> EPIIR.F 2 Oxidation (M)                                  |
| 176 - 187   | 1418.6834 | 1417.6761 | 1417.7309 | -39 | 0    | K.G <b>EV</b> VM <b>V</b> L <b>M</b> EPIIR.F 2 Oxidation (M)                                              |
| 188 - 192   | 620.4245  | 619.4173  | 619.3693  | 77  | 0    | R.FLV <b>NK</b> .K                                                                                        |
| 188 - 193   | 748.4899  | 747.4826  | 747.4643  | 24  | 1    | R.FLV <b>NK</b> .S                                                                                        |
| 215 - 232   | 1906.9376 | 1905.9303 | 1905.9472 | -9  | 0    | R.LDYAL <b>F</b> T <b>A</b> S <b>P</b> GT <b>V</b> SD <b>P</b> PR.S                                       |
| 252 - 280   | 2991.4420 | 2990.4347 | 2990.3741 | 20  | 0    | R.SGGES <b>LD</b> V <b>V</b> V <b>S</b> ET <b>G</b> W <b>P</b> TE <b>G</b> GT <b>E</b> T <b>N</b> LENAR.I |
| 336 - 341   | 728.4120  | 727.4048  | 727.3177  | 120 | 0    | K.YEV <b>N</b> F <b>G</b> .-                                                                              |

Spot No.: **39**

Mascot score: **86**

Sequence coverage %: **43**

NCBI accession No.: **gi| 312281829**

Matched peptides No.: **15**

Total peptides No.: **105**

Calculated Mr: **43118**

Calculated pI: **6.49**

### Annotated PMF spectra:

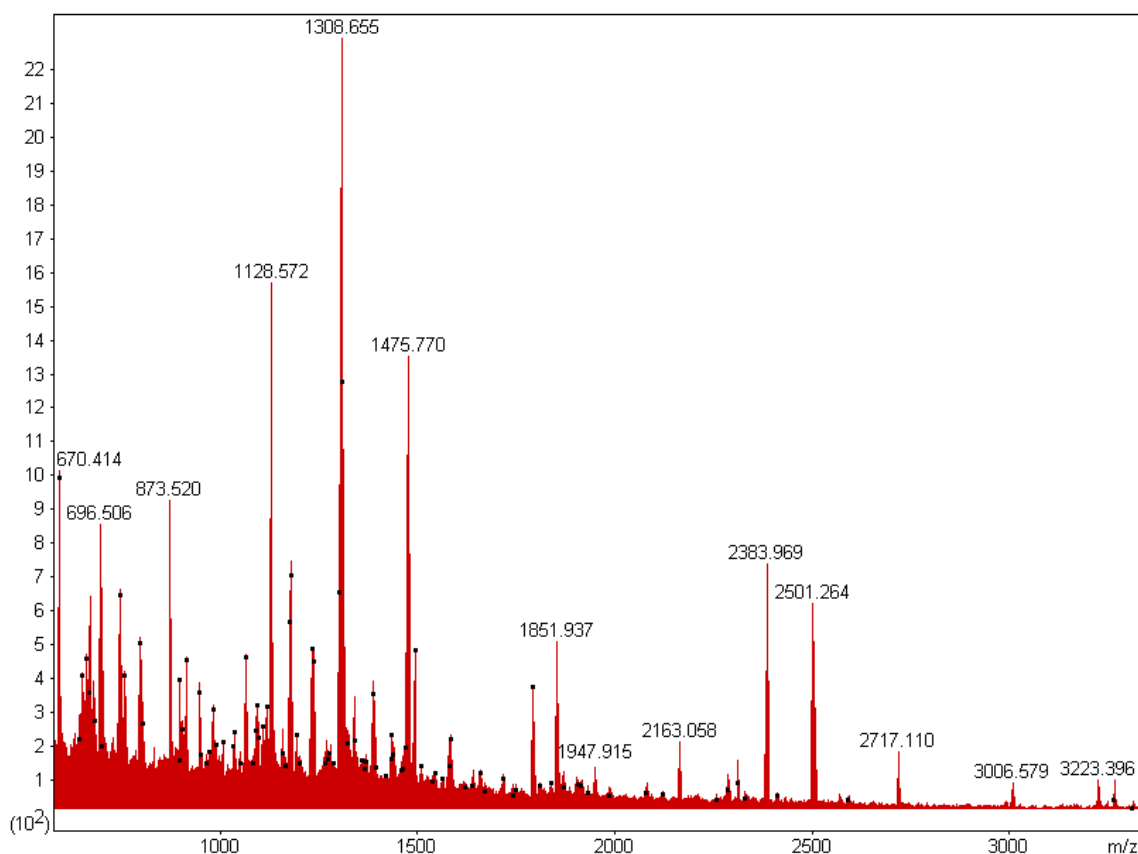

### Probability Based Mowse Score:

Protein score is  $-10 \cdot \log(P)$ , where P is the probability that the observed match is a random event. Protein scores greater than 72 are significant ( $p < 0.05$ ).

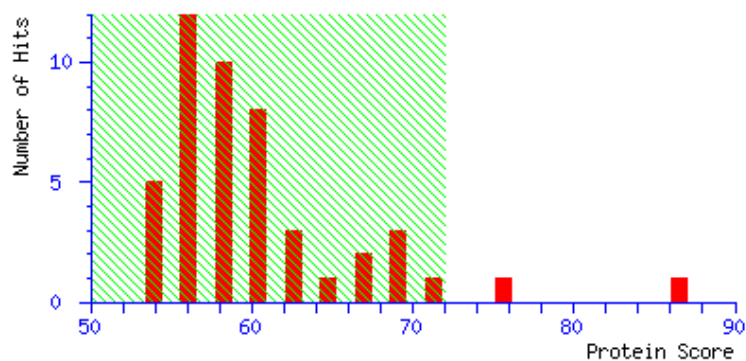

## Matched peptide sequences: shown in **Bold Red**

1 MASSSATLLK ASPVKSDWVK GQSHLLRQPS SVAAIR**SHVA** PSALT**VRAAS**  
 51 **AYADELVKTA** **KTIAS****PGRGI** **LAMDES****NATC** **GKRLAS****IGLE** **NTEANR****QAYR**  
 101 TLLVSAPGLG QYISGAILFE ETLYQSTVDG **KKMVDV****LVEQ** **NIVPGI****KVDK**  
 151 GLVPLVGSND ESWCQGLDGL ASR**TAAYY****QQ** **GARFAK****WRTV** VSIPNGPSAL  
 201 AV**KEAAW****GLA** **RYAAIS****QDSG** **LVPIVE****PEIL** LDGEHGIDRT YEVAEKVWAE  
 251 VFFYLAQNNV MFEGILLKPS **MVTPGAEAKD** **RATPEQ****VASY** TLKLLRNRI  
 301 PAVPGIMFLS GGQSELEATL NLNAMNQGTN PWHVSF**SYAR** ALQNT**CLK****TW**  
 351 **GGREEN****KAA** **QDTLL****TRAKA** NSLAQLGKYT EEGE**SEDAKE** **GMFV****KGYTY**

## Matched peptides information:

| Start - End | Observed  | Mr (expt) | Mr (calc) | ppm | Miss | Sequence                                   |
|-------------|-----------|-----------|-----------|-----|------|--------------------------------------------|
| 37 - 58     | 2256.1127 | 2255.1054 | 2255.1910 | -38 | 1    | R.SHVAPSALT <b>VRAAS</b> AYADELVK.T        |
| 62 - 68     | 701.4471  | 700.4398  | 700.3868  | 76  | 0    | K.TIAS <b>PGR</b> .G                       |
| 69 - 83     | 1638.8058 | 1637.7985 | 1637.7501 | 30  | 1    | R.GILAMDES <b>NATC</b> GKR.L Oxidation (M) |
| 83 - 96     | 1543.7900 | 1542.7827 | 1542.8114 | -19 | 1    | K.RLASIGLE <b>TEANR</b> .Q                 |
| 84 - 96     | 1387.7160 | 1386.7087 | 1386.7103 | -1  | 0    | R.LASIGLE <b>TEANR</b> .Q                  |
| 133 - 147   | 1669.8744 | 1668.8671 | 1668.9120 | -27 | 0    | K.MVDV <b>LVEQ</b> NIVPGIK.V Oxidation (M) |
| 174 - 183   | 1128.5724 | 1127.5651 | 1127.5359 | 26  | 0    | R.TAAY <b>YQQ</b> GAR.F                    |
| 204 - 211   | 873.5203  | 872.5130  | 872.4504  | 72  | 0    | K.EAAW <b>GLAR</b> .Y                      |
| 212 - 239   | 3006.5790 | 3005.5717 | 3005.5346 | 12  | 0    | R.YAAIS <b>QDSGL</b> VPIVEPEILLDGEHGIDR.T  |
| 269 - 281   | 1358.6695 | 1357.6622 | 1357.6660 | -3  | 1    | K.PSMV <b>TPGAEAKDR</b> .A                 |
| 280 - 293   | 1578.8222 | 1577.8149 | 1577.8049 | 6   | 1    | K.DRAT <b>PEQVASY</b> TLK.L                |
| 282 - 293   | 1307.6782 | 1306.6709 | 1306.6769 | -5  | 0    | R.AT <b>PEQVASY</b> TLK.L                  |
| 349 - 358   | 1175.6006 | 1174.5933 | 1174.5731 | 17  | 1    | K.TW <b>GGREEN</b> VK.A                    |
| 359 - 367   | 988.5580  | 987.5507  | 987.5349  | 16  | 0    | K.AA <b>QDTLL</b> TR.A                     |
| 390 - 399   | 1194.6135 | 1193.6062 | 1193.5427 | 53  | 1    | K.E <b>GMFV</b> KGYTY.-                    |

Spot No.: **40**

Mascot score: **86** Sequence coverage %: **15**

NCBI accession No.: **gi| 15238686**

Matched peptides No.: **12**

Total peptides No.: **28**

Calculated Mr: **84646**

Calculated pI: **6.09**

### Annotated PMF spectra:

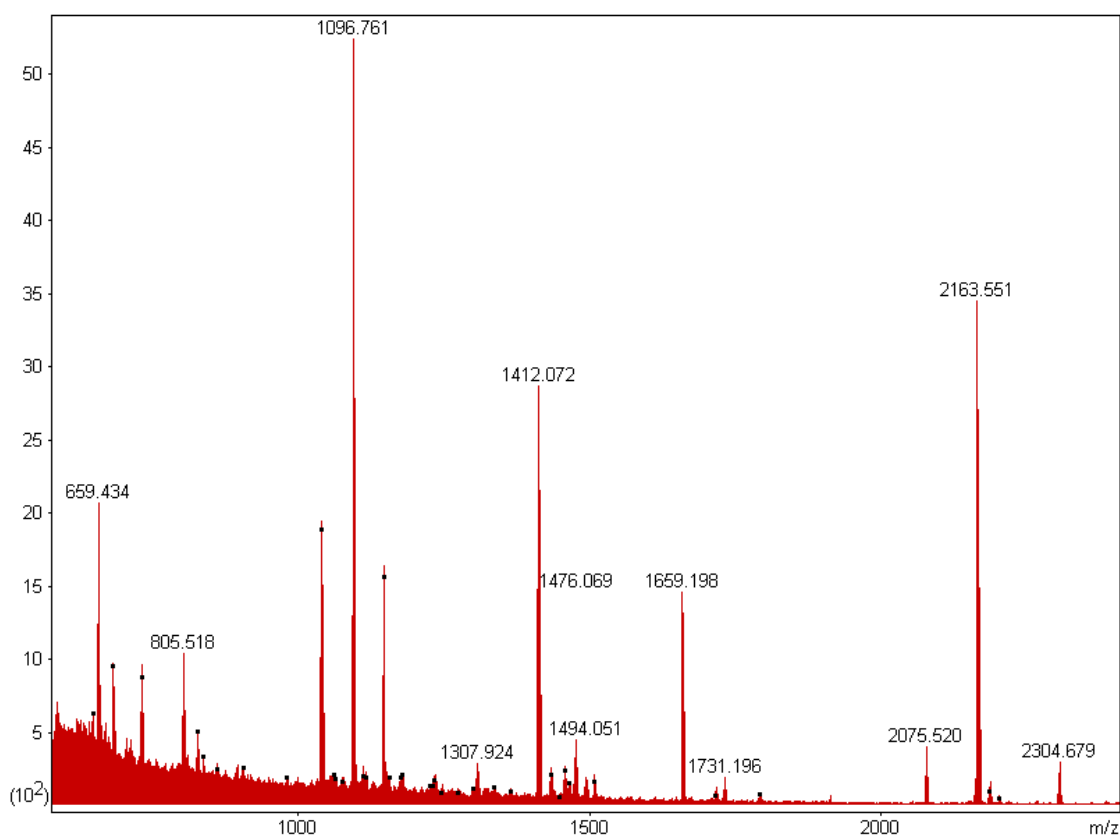

### Probability Based Mowse Score:

Protein score is  $-10 \cdot \log(P)$ , where P is the probability that the observed match is a random event. Protein scores greater than 72 are significant ( $p < 0.05$ ).

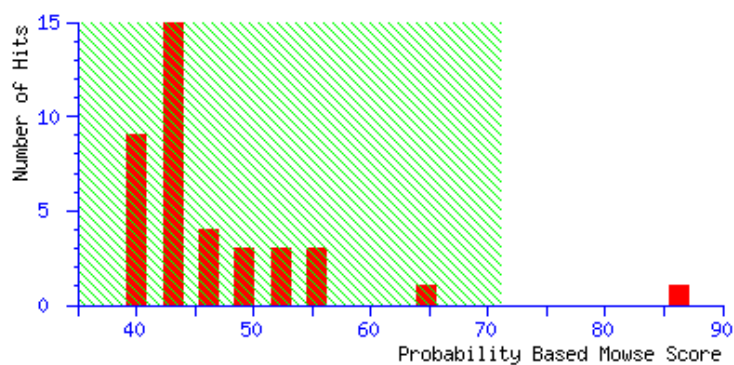



Matched peptide sequences: shown in **Bold Red**

```

1 MASHIVGYPR MGPKRELKFA LESFWDGKST AEDLQKVSAD LRSSIWKQMS
51 AAGTKFIPSN TFAHYDQVLD TTAMLGAVPP RYGYTGGEIG LDVYFSMARG
101 NASVPAMEMT KWFDNTNYHYI VPGLGPEVNF SYASHKAVNE YKEAKALGVD
151 TVPVLVGPVS YLLLSKAAKG VDKSFELLSL LPKILPIYKE VITELKAAGA
201 TWIQLDEPVL VMDLEGQKLQ AFTGAYAELE STLSGLNVLV ETYFADIPAE
251 AYKTLTSLKG VTAFGFDLVR GTKTLDLVKA GFPEGKYLFA GVVDGRNIWA
301 NDFAASLSTL QALEGIVGKD KLVVSTSCSL LHTAVDLIN TKLDDEIKSW
351 LAFAAQKVVE VNALAKALAG QKDEALFSAN AAALASRRSS PRVTNEGVOQK
401 AAAALKGSSDH RRATNVSARL DAQQKKLNLP ILPTTTIGSF PQTVELRRVR
451 REYKAKKVE EDYVKAIKEE IKKVVDLQEE LDIDVLVHGE PERNDMVEYF
501 GEQLSGFAFT ANGWVQSYGS RCVKPPVIYG DVSRPKAMTV FWSAMAQSMI
551 SRPMKGMLTG PVTILNWSFV RNDQPRHETC YQIALAIKDE VEDLEKGGIG
601 VIQIDEAALR EGLPLRKSEH AFYLDWAVHS FRITNCGVQD STQIHTHMCY
651 SHFNDIHISI IDMDADVITI ENSRSDEKLL SVFREGVKYG AGIGPGVYDI
701 HSPRIPSSEE IADRVNKMLA VLEQNILWVN PDCGLKTRKY TEVKPALKNM
751 VDAAKLIRSQ LASAK

```

Matched peptides information:

| Start - End | Observed  | Mr (expt) | Mr (calc) | ppm | Miss | Sequence                  |
|-------------|-----------|-----------|-----------|-----|------|---------------------------|
| 367 - 387   | 2075.5205 | 2074.5132 | 2074.0807 | 209 | 1    | K.ALAGQKDEALFSANAAALASR.R |
| 373 - 387   | 1507.0680 | 1506.0607 | 1505.7474 | 208 | 0    | K.DEALFSANAAALASR.R       |
| 401 - 411   | 1096.7615 | 1095.7542 | 1095.5785 | 160 | 1    | K.AAAALKGSDDR.R           |
| 474 - 493   | 2304.6786 | 2303.6713 | 2303.1645 | 220 | 0    | K.VVDLQEELDIDVLVHGEPER.N  |
| 597 - 610   | 1412.0722 | 1411.0649 | 1410.7831 | 200 | 0    | K.GGIGVIQIDEAALR.E        |
| 611 - 616   | 684.4377  | 683.4305  | 683.3966  | 50  | 0    | R.EGLPLR.K                |
| 679 - 684   | 734.4973  | 733.4900  | 733.4487  | 56  | 0    | K.LLSVFR.E                |
| 679 - 688   | 1147.8516 | 1146.8443 | 1146.6761 | 147 | 1    | K.LLSVFREGVK.Y            |
| 689 - 704   | 1659.1978 | 1658.1905 | 1657.8213 | 223 | 0    | K.YGAGIGPGVYDIHSPR.I      |
| 705 - 714   | 1116.7512 | 1115.7439 | 1115.5458 | 178 | 0    | R.IPSSEEIADR.V            |
| 705 - 717   | 1458.0740 | 1457.0667 | 1456.7521 | 216 | 1    | R.IPSSEEIADRVN.K.M        |
| 745 - 755   | 1157.7578 | 1156.7505 | 1156.6274 | 106 | 1    | K.PALRNMVDAAK.L           |

Spot No.: 41

Mascot score: 93 Sequence coverage %: 14

NCBI accession No.: gi| 146572852

Matched peptides No.: 9

Total peptides No.: 27

Calculated Mr: 61174

Calculated pI: 6.27

### Annotated PMF spectra:

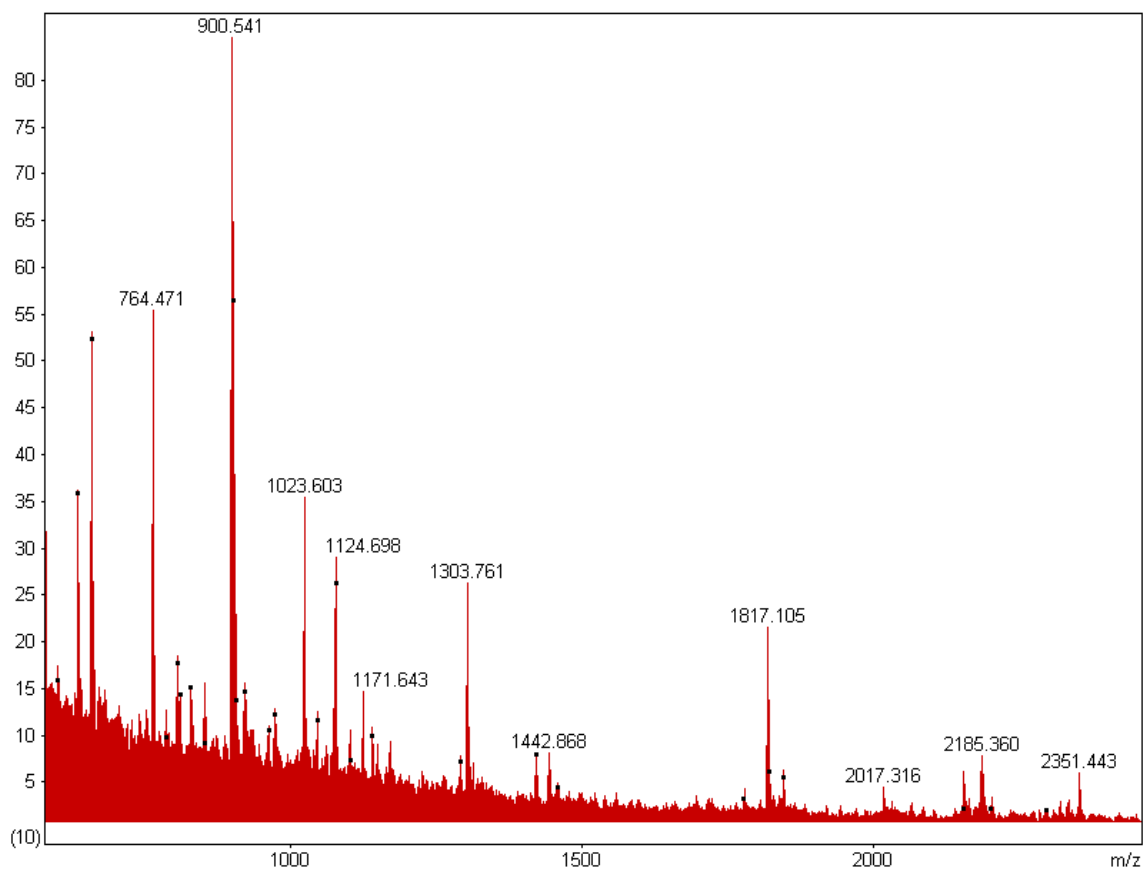

### Probability Based Mowse Score:

Protein score is  $-10 \cdot \log(P)$ , where P is the probability that the observed match is a random event. Protein scores greater than 72 are significant ( $p < 0.05$ ).

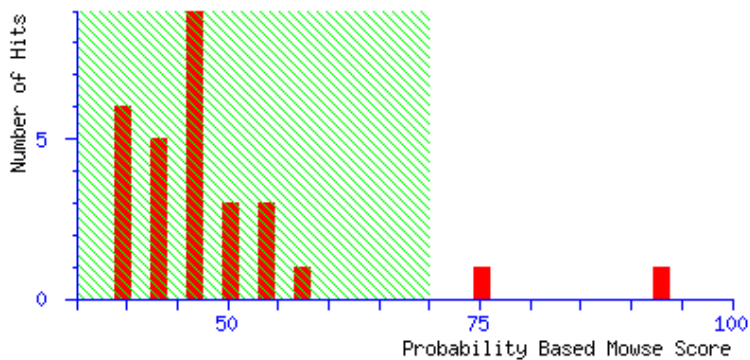

Matched peptide sequences: shown in **Bold Red**

```

1 DEEITCEENN PFTCSNTDIL SSKNFGKDFI FGVASSAYQI EGGRGRGVNV
51 WDGFSHRYPE KAGSDLKNGD TTCESYTRWQ KDVDVMGELN ATGYRFSFAW
101 SRIIPKGKVS RGVNQGLDY YHKLIDALLE KNITPFVTLF HWDLPQTLQD
151 EYEGFLDRQI IQDFKDYADL CFKEFGGKVK HWITINQLYT VPTRGYAIGT
201 DAPGRCSEPMV DTKHRCYGGN SSTEPYIVAH NQLLAHATVW DLYRTKYKFQ
251 KGKIGPVMIT RWFLPFDESD PASIEAAERM NQFFHGWYME PLTKGRYPDI
301 MRQIVGSRLP NFTEEEAELV AGSYDFLGLN YYVTQYAQPK PNPYPSETHT
351 AMMDAGVKLT YDNSRGEFLG PLFVEDKVNG NSYYYPKGIY YVMDFKTKY
401 GDPLIYVTEN GFSTPSSENR EQAIADYKRI DYLCSHLCFL RKVIKEKGVN
451 VRGYFAWALG DNYEFCKGFT VRFGLSYVNW EDLDDRNLKE SGKWYQRFIN
501 GTVKNSVKQD FLRSSLSSQS QKKRFADA

```

Matched peptides information:

| Start - End | Observed  | Mr (expt) | Mr (calc) | ppm | Miss | Sequence                   |
|-------------|-----------|-----------|-----------|-----|------|----------------------------|
| 28 - 44     | 1817.1052 | 1816.0979 | 1815.8792 | 120 | 0    | K.DFIFGVASSAYQIEGGR.G      |
| 68 - 78     | 1303.7608 | 1302.7535 | 1302.5146 | 183 | 0    | K.NGDTTCESYTR.W            |
| 96 - 102    | 900.5414  | 899.5341  | 899.4290  | 117 | 0    | R.FSFAWSR.I                |
| 174 - 180   | 764.4710  | 763.4638  | 763.4228  | 54  | 1    | K.EFGGKVK.H                |
| 195 - 205   | 1077.6568 | 1076.6495 | 1076.5251 | 116 | 0    | R.GYAIGTDAPGR.C            |
| 254 - 261   | 902.5995  | 901.5923  | 901.5055  | 96  | 0    | K.IGPVMITR.W Oxidation (M) |
| 295 - 302   | 1023.6033 | 1022.5960 | 1022.4967 | 97  | 1    | K.GRYPDIMR.Q Oxidation (M) |
| 297 - 302   | 810.4389  | 809.4316  | 809.3742  | 71  | 0    | R.YPDIMR.Q Oxidation (M)   |
| 303 - 308   | 659.4433  | 658.4360  | 658.3762  | 91  | 0    | R.QIVGSR.L                 |

Spot No.: 42

Mascot score: 87 Sequence coverage %: 17

NCBI accession No.: gi| 152207441

Matched peptides No.: 13

Total peptides No.: 38

Calculated Mr: 62750

Calculated pI: 8.71

### Annotated PMF spectra:

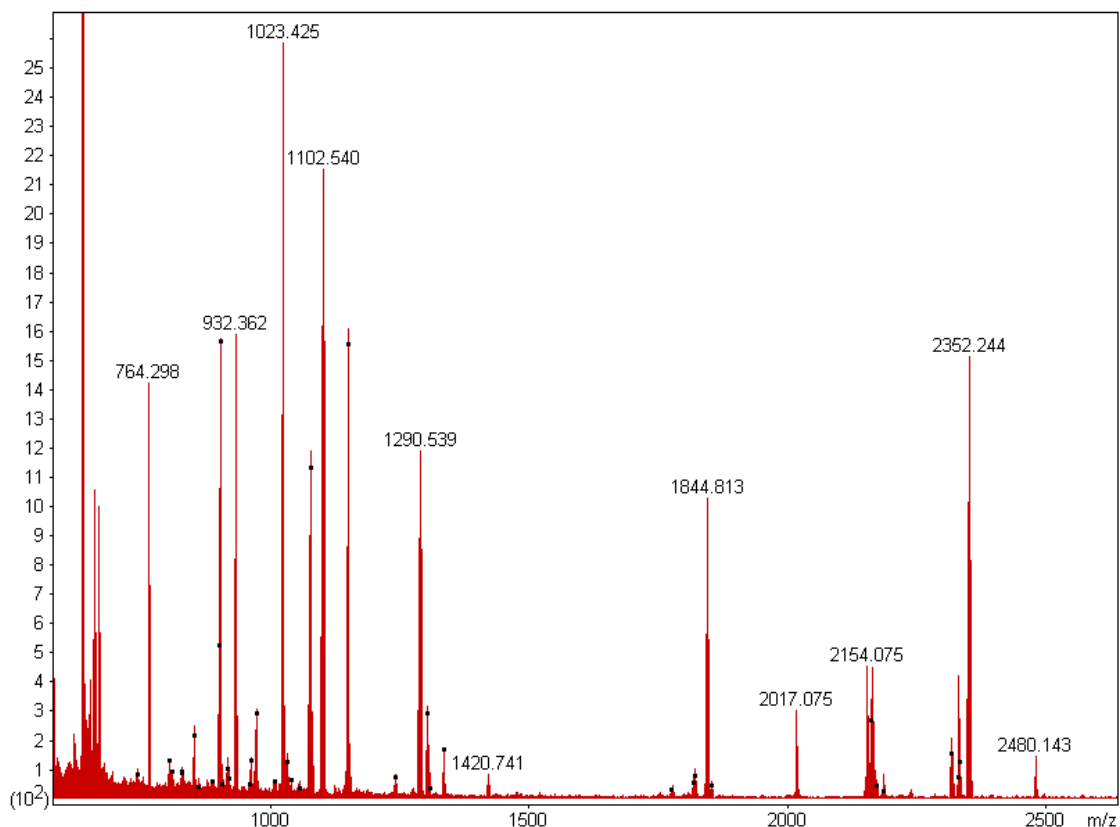

### Probability Based Mowse Score:

Protein score is  $-10 \cdot \log(P)$ , where P is the probability that the observed match is a random event. Protein scores greater than 72 are significant ( $p < 0.05$ ).

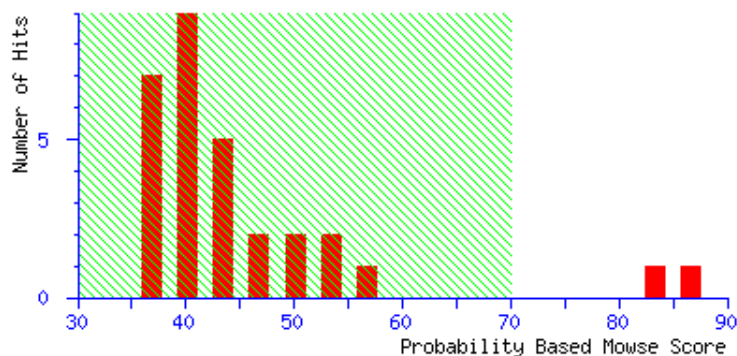

## Matched peptide sequences: shown in **Bold Red**

```

1  MKLLHGLALV FLLAAASCKA DEEITCEENN PFTCSNTDIL SSKNFGKDFI
51 FGVASSAYQI EGGRGRGVNV WDGFSHRYPE KSGSDLKNGD TTCESYTRWQ
101 KDVDVMGELN ATGYRFSFAW SRIIPKGKVS RGVNQGLDY YHKLIDALLE
151 KNITPFVTLF PWDLPQTLQD EYEGFLNRTV IDDFRDYADL CFKEFGGKVK
201 NWITINQLYT VPTRGYAIGT DAPGRCSPEV DEKCYGGNSS TEPYIVAHNQ
251 LLAHAAAVDV YRTKYKFQKG KIGPVMITRW FLPFDKTDQA SRDAANRMKE
301 FFLGRFMDPL TKGRYPDIMR EIVGSRLPNF TEAEAELVAG SYDFLGLNYY
351 TTQYAQPKPN PVTWANHTAM MDPGAKLTYN NSRGENLGPL FVKDEKNGNA
401 YYYPKGIYYV MDYFKNKYNN PLIYITENGF STPGKETREE AVADSKRIDY
451 LCSHLCFLRK VIREKGVNIK GYFAWALGDN YEFCKGFTVR FGLSYVNWTD
501 LNDRNLLKKSQ KWYQSFINGT TKNPAKQDFR RPNLSLRNQK KNLADA

```

## Matched peptides information:

| Start - End | Observed  | Mr(expt)  | Mr(calc)  | ppm  | Miss | Sequence                              |
|-------------|-----------|-----------|-----------|------|------|---------------------------------------|
| 88 - 98     | 1303.5817 | 1302.5744 | 1302.5146 | 46   | 0    | K.NGDTTCESYTR.W                       |
| 116 - 122   | 900.3528  | 899.3455  | 899.4290  | -93  | 0    | R.FSFAWSR.I                           |
| 186 - 193   | 1031.3714 | 1030.3641 | 1030.4430 | -77  | 0    | R.DYADLCFK.E                          |
| 194 - 200   | 764.2984  | 763.2912  | 763.4228  | -172 | 1    | K.EFGGKVK.N                           |
| 215 - 225   | 1077.4758 | 1076.4685 | 1076.5251 | -53  | 0    | R.GYAIGTDAPGR.C                       |
| 272 - 279   | 886.4160  | 885.4087  | 885.5106  | -115 | 0    | K.IGPVMITR.W                          |
| 272 - 279   | 902.4136  | 901.4064  | 901.5055  | -110 | 0    | K.IGPVMITR.W Oxidation (M)            |
| 287 - 292   | 677.2048  | 676.1975  | 676.3140  | -172 | 0    | K.TDQASR.D                            |
| 293 - 299   | 805.3217  | 804.3145  | 804.3912  | -95  | 1    | R.DAANRMK.E                           |
| 313 - 320   | 1007.4397 | 1006.4324 | 1006.5018 | -69  | 1    | K.GRYPDIMR.E                          |
| 313 - 320   | 1023.4247 | 1022.4174 | 1022.4967 | -78  | 1    | K.GRYPDIMR.E Oxidation (M)            |
| 315 - 320   | 810.2794  | 809.2722  | 809.3742  | -126 | 0    | R.YPDIMR.E Oxidation (M)              |
| 466 - 485   | 2352.2441 | 2351.2368 | 2351.1045 | 56   | 1    | K.GVNIKGYFAWALGDN <del>YEFCK</del> .G |

Spot No.: **43**

Mascot score: **86**    Sequence coverage %: **37**

NCBI accession No.: **gi| 78096539**

Matched peptides No.: **10**

Total peptides No.: **42**

Calculated Mr: **23412**

Calculated pI: **9.37**

### Annotated PMF spectra:

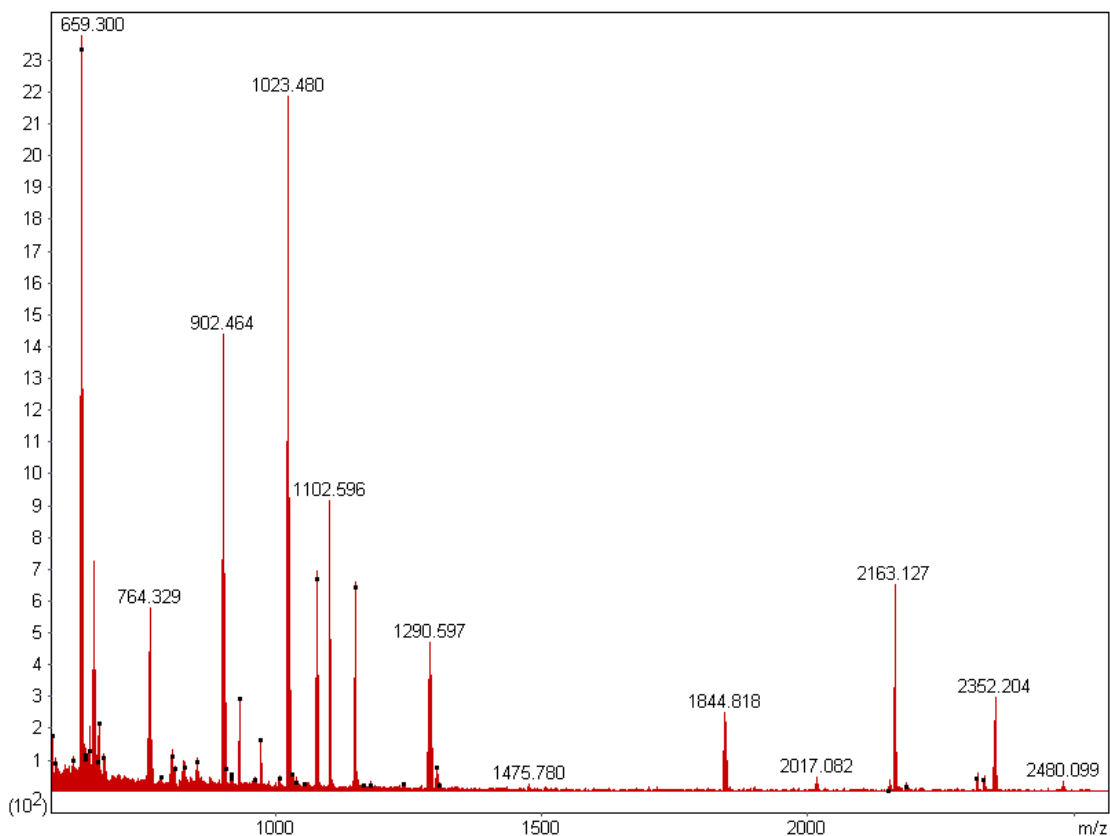

### Probability Based Mowse Score:

Protein score is  $-10 \cdot \log(P)$ , where P is the probability that the observed match is a random event. Protein scores greater than 72 are significant ( $p < 0.05$ ).

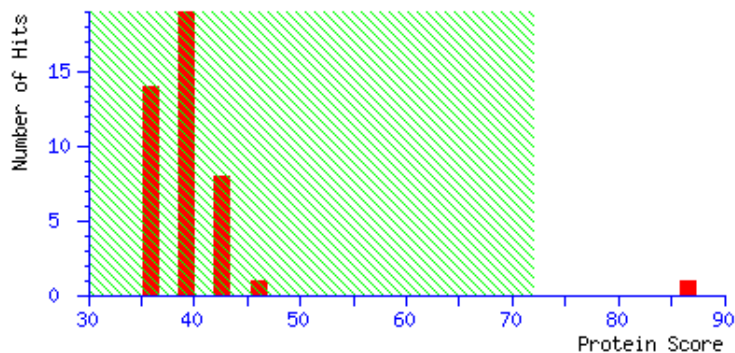

Matched peptide sequences: shown in **Bold Red**

1 **MAMVVAAGAR** MPVSVLVLVA LVVVCLSANG AAAQQASSVA ATYNLYNPEK  
51 INWDLRVASI FCATWDADMP LAWQRQRYGWT AFCGPAGAHG QPSCGRCLQV  
101 **TNRATGARTV ARVVDQCDRS AGSTLTSPCS GRSTPTEAAS PMATSSSTTS**  
151 **SSAARTDHAR DHRMLLHIPT IVAANKYAW** ISSIGKNKTQ **PKSISASMFY**  
201 **RGMQRMLSSD SEYLV**M

Matched peptides information:

| Start - End | Observed  | Mr(expt)  | Mr(calc)  | ppm  | Miss | Sequence                                  |
|-------------|-----------|-----------|-----------|------|------|-------------------------------------------|
| 2 - 10      | 861.3408  | 860.3335  | 860.4538  | -140 | 0    | <b>M.AMVVAAGAR.M</b> Oxidation (M)        |
| 104 - 112   | 902.7401  | 901.7329  | 901.5094  | 248  | 1    | <b>R.ATGARTVAR.V</b>                      |
| 113 - 132   | 2153.3492 | 2152.3419 | 2151.9637 | 176  | 1    | <b>R.VVDQCDRSAGSTLTSPCSGR.S</b>           |
| 133 - 155   | 2185.4793 | 2184.4720 | 2184.9805 | -233 | 0    | <b>R.STPTEAASPMATSSSTSSAAR.T</b>          |
| 156 - 163   | 1007.7690 | 1006.7617 | 1006.4693 | 291  | 1    | <b>R.TDHARDHR.M</b>                       |
| 161 - 176   | 1845.0664 | 1844.0591 | 1844.0090 | 27   | 1    | <b>R.DHRMLLHIPTIVAANK.Y</b> Oxidation (M) |
| 164 - 176   | 1421.0422 | 1420.0349 | 1419.8272 | 146  | 0    | <b>R.MLLHIPTIVAANK.Y</b>                  |
| 193 - 201   | 1077.7924 | 1076.7851 | 1076.4961 | 269  | 0    | <b>K.SISASMFYR.G</b> Oxidation (M)        |
| 206 - 216   | 1274.8567 | 1273.8494 | 1273.5570 | 230  | 0    | <b>R.MLSSDSEYLV.M.-</b>                   |
| 206 - 216   | 1290.8464 | 1289.8391 | 1289.5519 | 223  | 0    | <b>R.MLSSDSEYLV.M.-</b> Oxidation (M)     |

Spot No.: **44**

Mascot score: **84**    Sequence coverage %: **20**

NCBI accession No.: **gi| 152207441**

Matched peptides No.: **14**

Total peptides No.: **51**

Calculated Mr: **62750**

Calculated pI: **8.71**

### Annotated PMF spectra:

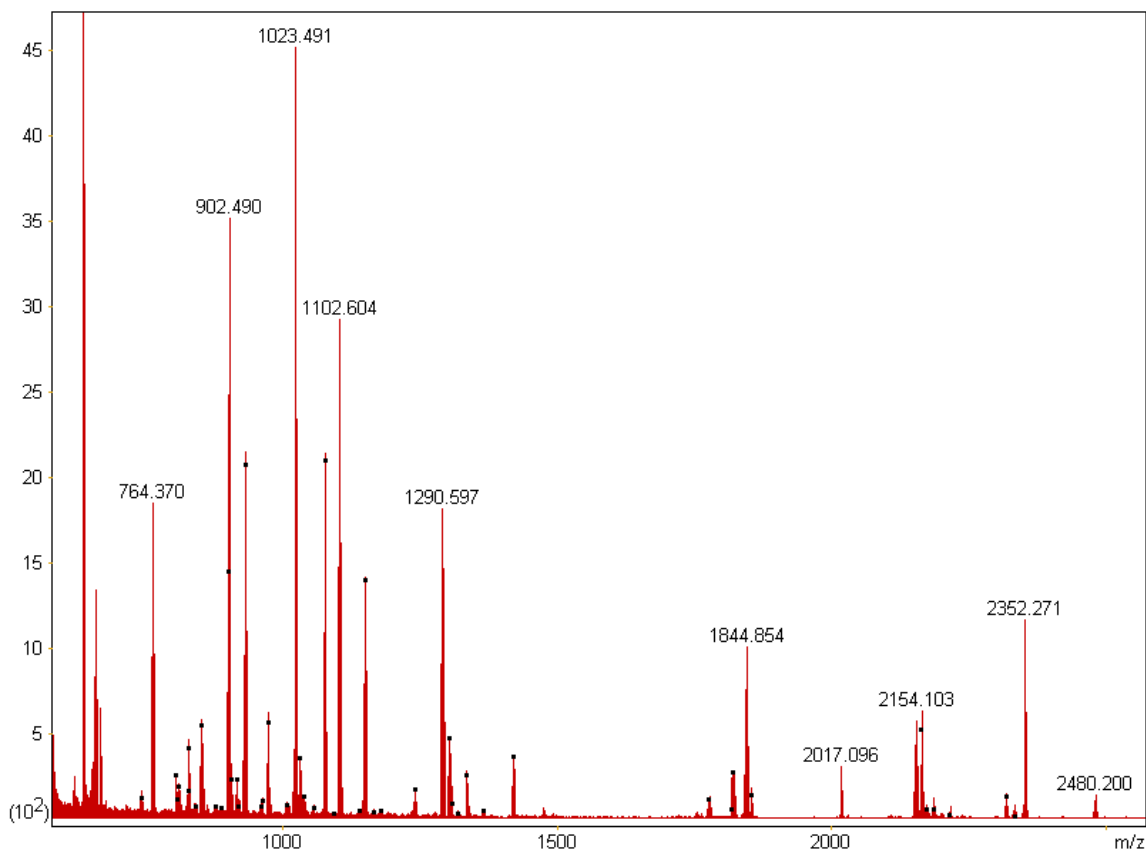

### Probability Based Mowse Score:

Protein score is  $-10 \cdot \log(P)$ , where P is the probability that the observed match is a random event. Protein scores greater than 72 are significant ( $p < 0.05$ ).

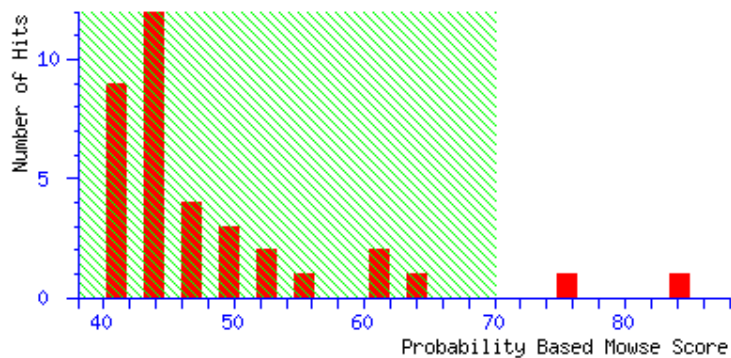



Matched peptide sequences: shown in **Bold Red**

```

1  MKLLHGLALV FLLAAASCKA DEEITCEENN PFTCSNTDIL SSKNFGKDFI
51 FGVASSAYQI EGGRGRGVNV WDGFSHRYPE KSGSDLKNGD TTCESYTRWQ
101 KDVDVMGELN ATGYRFSFAW SRIIPKGKVS RGVNQGLDY YHKLIDALLE
151 KNITPFVTLF PWDLPQTLQD EYEGFLNRTV IDDFRDYADL CFKEFGGKVK
201 NWITINQLYT VPTRGYAIGT DAPGRCSPPEV DEKCYGGNSS TEPYIVAHNQ
251 LLAHAAAVDV YRTKYKFQKG KIGPVMITRW FLPFDKTDQA SRDAANRMKE
301 FFLGRFMDPL TKGRYPDIMR EIVGSRLPNF TEAEAELVAG SYDFLGLNYY
351 TTQYAQPKN PVTWANHTAM MDPGAKLTYN NSRGENLGPL FVKDEKNGNA
401 YYYPKGIYYV MDYFKNKYNN PLIYITENGF STPGKETREE AVADSKRIDY
451 LCSHLCFLRK VIREKGVNIK GYFAWALGDN YEFCKGFTVR FGLSYVNWTD
501 LNDRNLKKSQ KWYQSFINGT TKNPAKQDFR RPNLSLRNQK KNLADA

```

Matched peptides information:

| Start - End | Observed  | Mr(expt)  | Mr(calc)  | ppm | Miss | Sequence                          |
|-------------|-----------|-----------|-----------|-----|------|-----------------------------------|
| 48 - 64     | 1816.9361 | 1815.9288 | 1815.8792 | 27  | 0    | <b>K.DFIFGVASSAYQIEGGR.G</b>      |
| 88 - 98     | 1303.6452 | 1302.6379 | 1302.5146 | 95  | 0    | <b>K.NGDTTCESYTR.W</b>            |
| 116 - 122   | 900.4158  | 899.4085  | 899.4290  | -23 | 0    | <b>R.FSFAWSR.I</b>                |
| 186 - 193   | 1031.4316 | 1030.4243 | 1030.4430 | -18 | 0    | <b>R.DYADLCFK.E</b>               |
| 194 - 200   | 764.3697  | 763.3624  | 763.4228  | -79 | 1    | <b>K.EFGGKVK.N</b>                |
| 215 - 225   | 1077.5356 | 1076.5283 | 1076.5251 | 3   | 0    | <b>R.GYAIGTDAPGR.C</b>            |
| 272 - 279   | 886.4521  | 885.4448  | 885.5106  | -74 | 0    | <b>K.IGPVMITR.W</b>               |
| 272 - 279   | 902.4902  | 901.4829  | 901.5055  | -25 | 0    | <b>K.IGPVMITR.W</b> Oxidation (M) |
| 287 - 292   | 677.2677  | 676.2605  | 676.3140  | -79 | 0    | <b>K.TDQASR.D</b>                 |
| 293 - 299   | 805.3959  | 804.3887  | 804.3912  | -3  | 1    | <b>R.DAANRMK.E</b>                |
| 313 - 320   | 1007.4891 | 1006.4818 | 1006.5018 | -20 | 1    | <b>K.GRYPDIMR.E</b>               |
| 313 - 320   | 1023.4907 | 1022.4834 | 1022.4967 | -13 | 1    | <b>K.GRYPDIMR.E</b> Oxidation (M) |
| 315 - 320   | 810.3496  | 809.3423  | 809.3742  | -39 | 0    | <b>R.YPDIMR.E</b> Oxidation (M)   |
| 466 - 485   | 2352.2712 | 2351.2639 | 2351.1045 | 68  | 1    | <b>K.GVNIKGYFAWALGDNYEFCK.G</b>   |

Spot No.: **45**

Mascot score: **85**    Sequence coverage %: **19**

NCBI accession No.: **gi| 10177293**

Matched peptides No.: **12**

Total peptides No.: **33**

Calculated Mr: **61812**

Calculated pI: **9.60**

### Annotated PMF spectra:

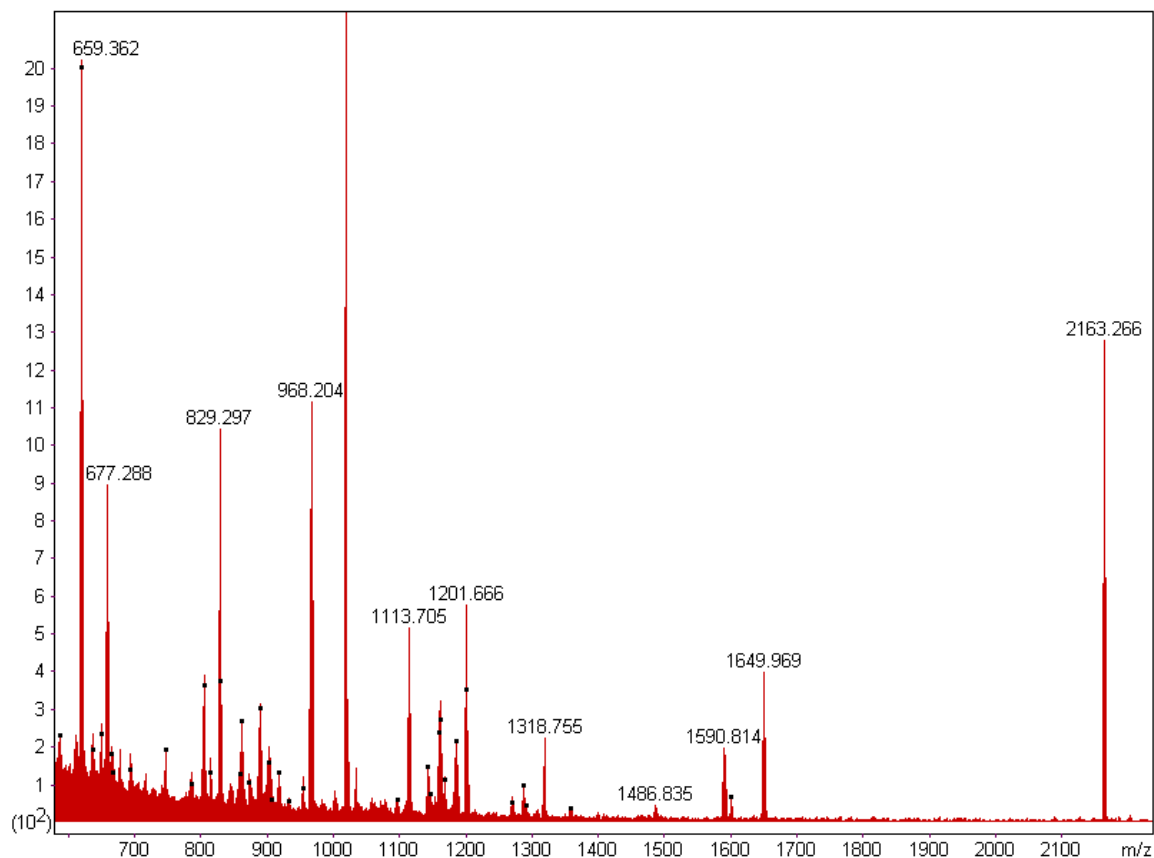

### Probability Based Mowse Score:

Protein score is  $-10 \cdot \log(P)$ , where P is the probability that the observed match is a random event. Protein scores greater than 72 are significant ( $p < 0.05$ ).

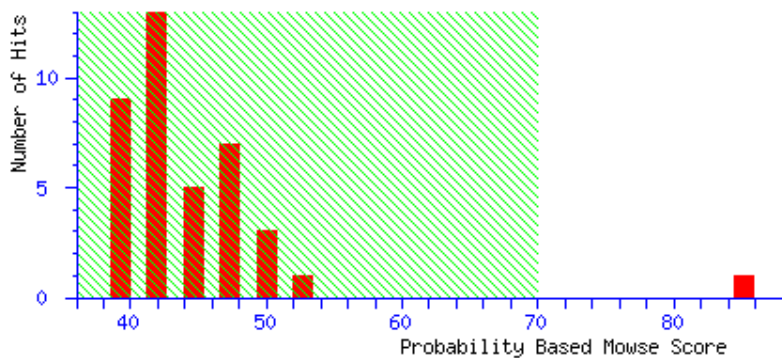

Matched peptide sequences: shown in **Bold Red**

```

1  MDPSAAPYNP RYTGGGGGYG PSPVMAGDNS GYNRYPSFQP PSGGFSVGRG
51 GGRGGYGQYG DRNGGGNWGG GGGRGGSSKR ELDSVSLPKQ NFGNLVHFEK
101 NFYVESPTVQ AMTEQDVAMY RTERDISVEG RDVPKPMKMF QDANFPDNIL
151 EAIAKLGFTE PTPIQAQGWP MALKGRDLIG IAETGSGKTL AYLLPALVHV
201 SAQPRLGQDD GPIVLILAPT RELAVQIQEE SRKFGLRSGV RSTCIYGGAP
251 KGPQIRDLR R GVEIVIATPG RLIDMLECQH TNLKRVTYLV LDEADRMLDM
301 GFEPQIRKIV SQIRPDRQTL LWSATWPREV ETLARQFLRD PYKAIIGSTD
351 LKANQSINQV IEIVPTPEKY NRLLTLLKQL MDGSKILIFV ETKRGCDQVT
401 RQLRMDGWPA LAIHGDKTQS ERDRVLAEFK SGRSPIMTAT DVAARGLDVK
451 DIKCVVNYDF PNTLEDYIHR IGRTGRAGAK GMAFTFFTHD NAKFARELVK
501 ILQEAGQVVP PTLSALVRSS GSGYGGSGGG RNFRPRGGGR GGGFGDKRSR
551 STSNEVPHGG KRTW

```

Matched peptides information:

| Start - End | Observed  | Mr(expt)  | Mr(calc)  | ppm  | Miss | Sequence                  |
|-------------|-----------|-----------|-----------|------|------|---------------------------|
| 80 - 89     | 1143.6475 | 1142.6402 | 1142.6295 | 9    | 1    | K.RELDSVSLPK.Q            |
| 122 - 131   | 1161.6444 | 1160.6371 | 1160.5786 | 50   | 1    | R.TERDISVEGR.D            |
| 132 - 138   | 830.5137  | 829.5064  | 829.4368  | 84   | 0    | R.DVPKPMK.M Oxidation (M) |
| 177 - 188   | 1160.6395 | 1159.6322 | 1159.6085 | 20   | 0    | R.DLIGIAETGSGK.T          |
| 233 - 237   | 620.3546  | 619.3473  | 619.3806  | -54  | 1    | R.KFGLR.S                 |
| 252 - 259   | 954.5522  | 953.5449  | 953.5406  | 5    | 1    | K.GPQIRDLR.R              |
| 318 - 328   | 1358.7645 | 1357.7572 | 1357.7143 | 32   | 0    | R.QTLLWSATWPR.E           |
| 344 - 352   | 917.3328  | 916.3256  | 916.5229  | -215 | 0    | K.AIIGSTDLK.A             |
| 471 - 476   | 659.3615  | 658.3542  | 658.3875  | -50  | 1    | R.IGRTGR.A                |
| 481 - 493   | 1486.8347 | 1485.8274 | 1485.6711 | 105  | 0    | K.GMAFTFFTHDNAK.F         |
| 494 - 500   | 862.4368  | 861.4296  | 861.5072  | -90  | 1    | K.FARELVK.I               |
| 551 - 562   | 1286.7560 | 1285.7487 | 1285.6527 | 75   | 1    | R.STSNEVPHGGKR.T          |

Spot No.: 46

Mascot score: 84

Sequence coverage %: 24

NCBI accession No.: gi| 34849893

Matched peptides No.: 20

Total peptides No.: 76

Calculated Mr: 89768

Calculated pI: 6.52

### Annotated PMF spectra:

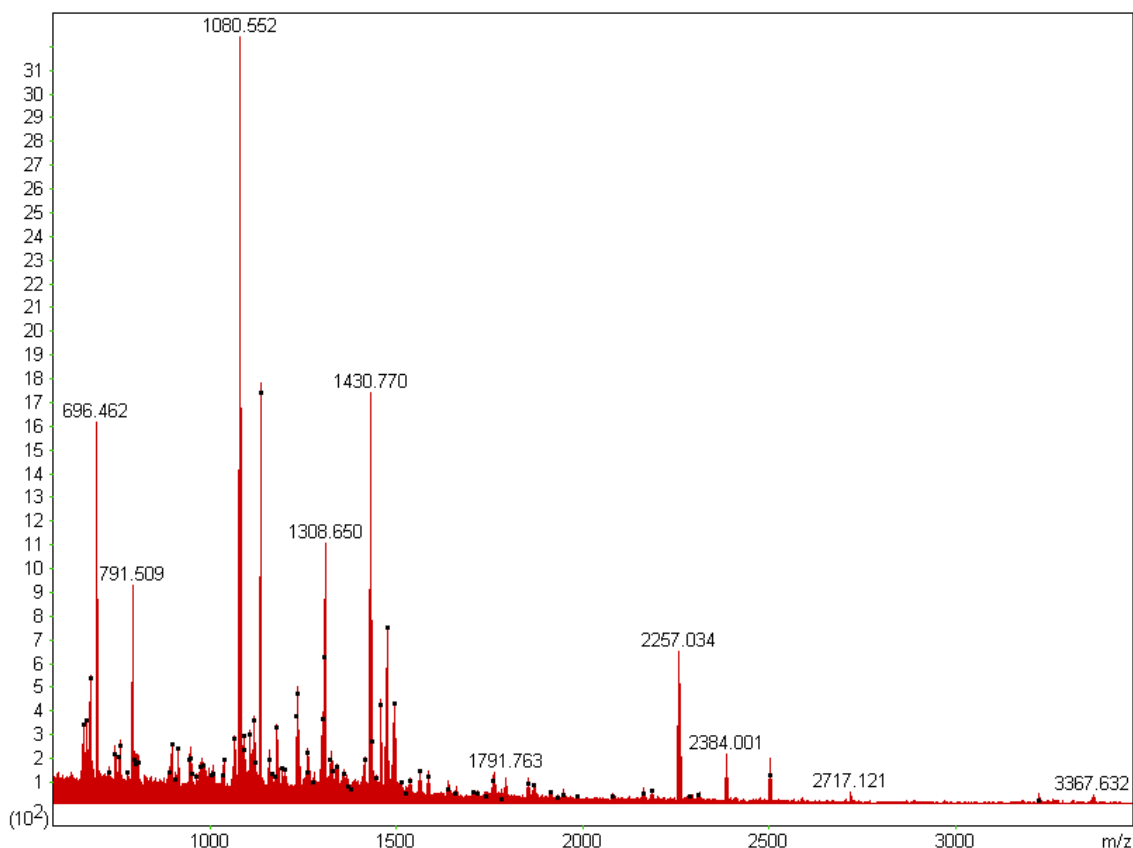

### Probability Based Mowse Score:

Protein score is  $-10 \cdot \log(P)$ , where P is the probability that the observed match is a random event. Protein scores greater than 72 are significant ( $p < 0.05$ ).

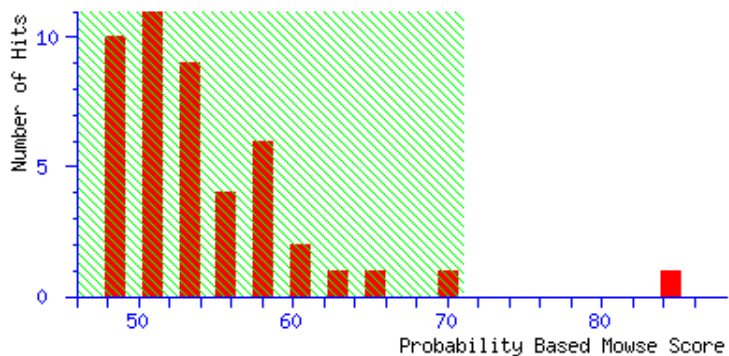

## Matched peptide sequences: shown in **Bold Red**

1 **MPLRNQNRAP** **LSPSPNVKKEA** **LSSIPFDKRR** **EETQGTGRRQ** VLSTVNRQDA  
 51 NSDVGSTEEC GKVEFTKDEV LALLNERAKA GKFDTKGK**IE** **QMTDIIK**KLK  
 101 VCVRWYQQVD ETHVQDKENL SSSLQSAEKR YSDKELDAKT KEEELRATIT  
 151 EMKENIESLQ EKLSKEKLSK LDAIENHRRE KDCRVVAEKL **QVSLREELDK**  
 201 VKEEKMAAK**Q** **KVTSLED**MYK RLQEYNTSLQ QYNTKL**QTDL** **EVAREAH**TRA  
 251 EKEKSSILEN LTTLRGHSKS LQDQLASSRV SQDEAVKQKD SLLMEVNNLQ  
 301 SELQQVRDDR DRHVVSQKL AGEILMYKES VGKSSHELDI LIAKSGSLEE  
 351 TCSLQKERIK **MLEQELAF**AK EKLMVDLSM SHTMTEFEEQ **KQCMHELQDR**  
 401 LADTERQLFE GELLRKK**LHN** **TILEL**KGNI R VFCRVR**PLLP** **DDGGR**QEASV  
 451 IAYPTSTESL GRGIDVVQSG NK**HPFT**FDKV FDHGASQEEV FFEISQLVQS  
 501 ALDGYKVCIF AYQQTGSGKT YTMMGRPETP EQKGLIPRSL EQIFK**TSQSL**  
 551 **STQGW**KYK**MQ** **VSMLEI**YNES **IRDLL**STSRT IAIESVRADS STSGRQYITIT  
 601 HDVNGNTHVS DLTIVDVCSI GQISSLLQQA AQSRVSGKTH MNEQSSR**SHF**  
 651 **VFTLR**ISGVN ESTEQQVQGV LNLIDLAGE RLSRSGATGD RLKETQAINK  
 701 **SLSALS**DV**IF** **ALAKK**EDHVP FRNSKLTYLL QPCLGGDSET LMFVNISPDP  
 751 SSTGESLCSL RFAARVNACE IGIPRR**Q**TS**A** **KLLDS**RLSYG

## Matched peptides information:

| Start - End | Observed  | Mr (expt) | Mr (calc) | ppm  | Miss | Sequence                                |
|-------------|-----------|-----------|-----------|------|------|-----------------------------------------|
| 2 - 8       | 897.4349  | 896.4276  | 896.4940  | -74  | 1    | M.PLRNQNR.A                             |
| 5 - 17      | 1434.7468 | 1433.7395 | 1433.7739 | -24  | 1    | R.NQNRAPLSPSPNVK.K                      |
| 18 - 28     | 1234.6392 | 1233.6319 | 1233.6605 | -23  | 1    | K.KEALSSIPFDK.R                         |
| 19 - 29     | 1262.6217 | 1261.6144 | 1261.6666 | -41  | 1    | K.EALSSIPFDK.R                          |
| 31 - 39     | 1033.5143 | 1032.5070 | 1032.4948 | 12   | 1    | R.EETQGTGRR.Q                           |
| 89 - 97     | 1090.5312 | 1089.5239 | 1089.5740 | -46  | 0    | K.IEQMTDIIK.K                           |
| 190 - 200   | 1329.6380 | 1328.6307 | 1328.7299 | -75  | 1    | K.LQVSLREELDK.V                         |
| 210 - 220   | 1357.6663 | 1356.6590 | 1356.6595 | -0   | 1    | K.QKVTSLLEDYK.R Oxidation (M)           |
| 236 - 249   | 1638.8508 | 1637.8435 | 1637.8485 | -3   | 1    | K.LQTDLEVAREAHTR.A                      |
| 361 - 370   | 1179.5725 | 1178.5652 | 1178.6005 | -30  | 0    | K.MLEQELAFK.E                           |
| 392 - 400   | 1232.5836 | 1231.5763 | 1231.5074 | 56   | 0    | K.QCMHELQDR.L Oxidation (M)             |
| 418 - 426   | 1080.5520 | 1079.5447 | 1079.6339 | -83  | 0    | K.LHNTILELK.G                           |
| 435 - 445   | 1194.5784 | 1193.5711 | 1193.6517 | -67  | 0    | R.VRLLPDDGGR.Q                          |
| 473 - 479   | 891.4628  | 890.4555  | 890.4287  | 30   | 0    | K.HPFTFDK.V                             |
| 546 - 558   | 1513.7177 | 1512.7104 | 1512.7572 | -31  | 1    | K.TSQSLSTQGWKYK.M                       |
| 559 - 579   | 2501.2839 | 2500.2766 | 2500.2301 | 19   | 1    | K.MQVSMLEIYNESIRDLLSTSR.T Oxidation (M) |
| 573 - 579   | 791.5093  | 790.5020  | 790.4185  | 106  | 0    | R.DLLSTSR.T                             |
| 648 - 655   | 1006.4620 | 1005.4547 | 1005.5396 | -84  | 0    | R.SHFVFTLR.I                            |
| 701 - 715   | 1562.7460 | 1561.7387 | 1561.9079 | -108 | 1    | K.SLSALS DVIFALAKK.E                    |
| 777 - 786   | 1118.5168 | 1117.5095 | 1117.6091 | -89  | 1    | R.QTSARLLDSR.L                          |

Spot No.: 47

Mascot score: 171

Sequence coverage %: 39

NCBI accession No.: gi| 30959098

Matched peptides No.: 25

Total peptides No.: 108

Calculated Mr: 49918

Calculated pI: 6.12

### Annotated PMF spectra:



### Probability Based Mowse Score:

Protein score is  $-10 \cdot \log(P)$ , where P is the probability that the observed match is a random event. Protein scores greater than 72 are significant ( $p < 0.05$ ).

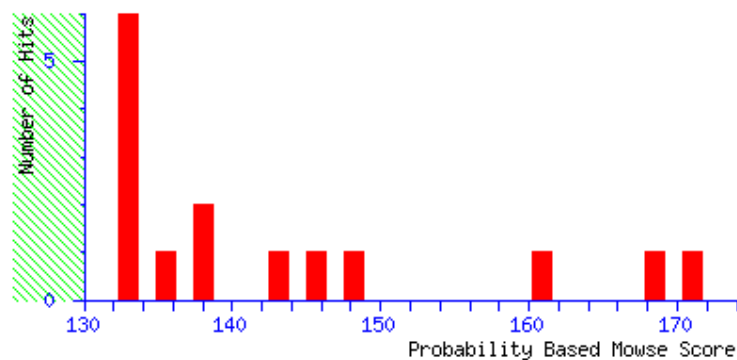

## Matched peptide sequences: shown in **Bold Red**

```

1  SVGFKAGVKE  YKLYYYTPEY  ETKDTDILAA  FRVTPQPGVP  PEEAGAAVAA
51 ESSTGTWTV  WIDGLTSLDR  YKGRCYHIEP  VAGEENQYIA  YVAYPLDLFE
101 EGVVXXMFXX  IVGNVFGFKA  LAALRLEDLR  IPPAYTKTFQ  GPPHGIQVER
151 DKLNKYGRPL  LGCTIKPKLG  LSAKNYGRAV  YECLRGGLDF  TKDDENVNSQ
201 PFMRWRDRFL  FCAEALYKAQ  TETGEIKGHY  LNATAGTCEE  MIKRAVFARE
251 LGVPIVMHDY  LTGGFTANTS  LAHYCRDNGL  LLHIHRAMHA  VIDRQKNHGM
301 HFRVLAKALR  LSGGDHIHAG  TVVGKLEGDR  ESTLGFVDLL  RDDYIEKDRS
351 RGIFFTQDWV  SLPGVLPVAS  GGIHVWHMPA  LTEIFGDDSV  LQFGGGTLGH
401 PWGNAPGAVA  NRVALEACVQ  ARNEGRDLAV  EGNEIIREAS  KWSPELAAA

```

## Matched peptides information:

| Start - End | Observed  | Mr (expt) | Mr (calc) | ppm | Miss | Sequence                              |
|-------------|-----------|-----------|-----------|-----|------|---------------------------------------|
| 24 - 32     | 1021.6509 | 1020.6436 | 1020.5240 | 117 | 0    | K.DTDILAAFR.V                         |
| 120 - 125   | 614.4258  | 613.4186  | 613.3911  | 45  | 0    | K.ALAALR.L                            |
| 120 - 130   | 1240.8798 | 1239.8725 | 1239.7299 | 115 | 1    | K.ALAALRLEDLR.I                       |
| 126 - 130   | 645.3686  | 644.3614  | 644.3493  | 19  | 0    | R.LEDLR.I                             |
| 138 - 150   | 1465.9758 | 1464.9685 | 1464.7474 | 151 | 0    | K.TFQGP <b>PHGIQVER</b> .D            |
| 138 - 152   | 1709.0891 | 1708.0818 | 1707.8693 | 124 | 1    | K.TFQGP <b>PHGIQVERDK</b> .L          |
| 179 - 185   | 910.5267  | 909.5195  | 909.4378  | 90  | 0    | R.AVYECLR.G                           |
| 186 - 204   | 2170.2273 | 2169.2200 | 2168.9797 | 111 | 1    | R.GGLDFTKDDENVNSQPFMR.W               |
| 186 - 204   | 2186.2217 | 2185.2144 | 2184.9746 | 110 | 1    | R.GGLDFTKDDENVNSQPFMR.W Oxidation (M) |
| 205 - 208   | 632.3520  | 631.3447  | 631.3190  | 41  | 1    | R.WRDR.F                              |
| 219 - 227   | 976.4622  | 975.4549  | 975.4873  | -33 | 0    | K.AQTETGEIK.G                         |
| 228 - 244   | 1967.1442 | 1966.1369 | 1965.9037 | 119 | 1    | K.GHYLNATAGTCEEMIKR.A Oxidation (M)   |
| 277 - 286   | 1187.8122 | 1186.8049 | 1186.6571 | 125 | 0    | R.DNGLLLHIHR.A                        |
| 287 - 294   | 912.5449  | 911.5376  | 911.4647  | 80  | 0    | R.AMHAVIDR.Q                          |
| 287 - 294   | 928.5407  | 927.5334  | 927.4596  | 80  | 0    | R.AMHAVIDR.Q Oxidation (M)            |
| 295 - 303   | 1170.7653 | 1169.7580 | 1169.5512 | 177 | 1    | R.QKNHGMHFR.V Oxidation (M)           |
| 297 - 303   | 898.5056  | 897.4984  | 897.4028  | 107 | 0    | K.NHGMHFR.V                           |
| 297 - 303   | 914.5017  | 913.4945  | 913.3977  | 106 | 0    | K.NHGMHFR.V Oxidation (M)             |
| 311 - 325   | 1447.9468 | 1446.9395 | 1446.7579 | 126 | 0    | R.LSGGDHIHAGTVVGK.L                   |
| 326 - 341   | 1820.1888 | 1819.1815 | 1818.9476 | 129 | 1    | K.LEGDRESTLGFV <b>DLLR</b> .D         |
| 331 - 341   | 1249.8378 | 1248.8305 | 1248.6714 | 127 | 0    | R.ESTLGFV <b>DLLR</b> .D              |
| 331 - 347   | 2013.2321 | 2012.2248 | 2012.0102 | 107 | 1    | R.ESTLGFV <b>DLLR</b> DDYIEK.D        |
| 342 - 349   | 1053.6126 | 1052.6053 | 1052.4774 | 122 | 1    | R.DDYIEKDR.S                          |
| 413 - 422   | 1116.7105 | 1115.7032 | 1115.5757 | 114 | 0    | R.VALEACVQAR.N                        |
| 427 - 437   | 1228.8208 | 1227.8135 | 1227.6459 | 137 | 0    | R.DLAVEGNEIIR.E                       |

Spot No.: **48**

Mascot score: **87**    Sequence coverage %: **23**

NCBI accession No.: **gi| 312282657**

Matched peptides No.: **11**

Total peptides No.: **38**

Calculated Mr: **53947**

Calculated pI: **6.43**

### Annotated PMF spectra:

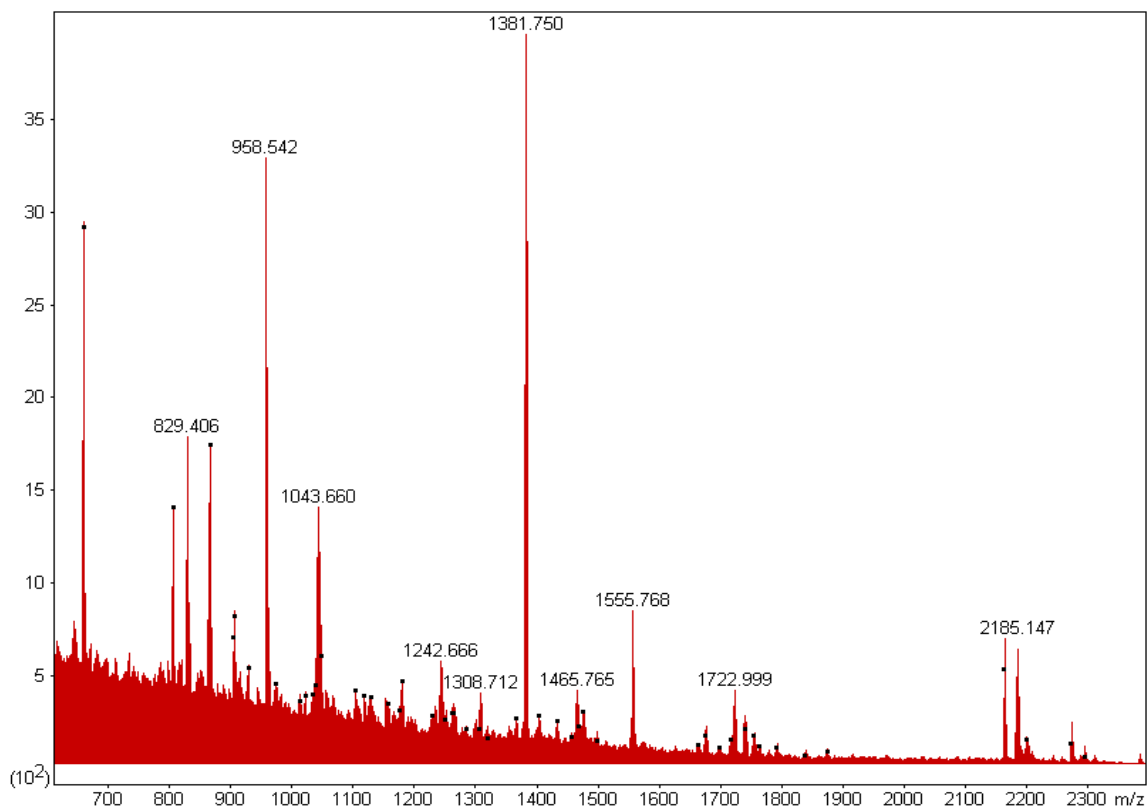

### Probability Based Mowse Score:

Protein score is  $-10 \cdot \log(P)$ , where P is the probability that the observed match is a random event. Protein scores greater than 72 are significant ( $p < 0.05$ ).

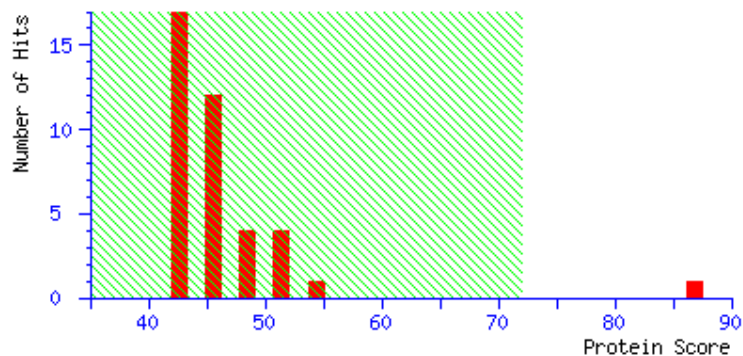



Matched peptide sequences: shown in **Bold Red**

```

1  MAGTGIFTEI LDGDVYKYYS DGEWKNSSSG KSVAIVNPST RKTQYKVQAC
51  TQEEVNKVM E MAKSAQKSWA KTPLWKRAEL LHKAAAAILKD NKAPIAESLV
101 KEIAKPAKDS VTEVVRSGDL ISYCAEEGVR ILGEGKFLLS DSFPGNERTK
151 YCLTSKIPLG VVLAIPPFNY PVNLAVSKIA PALIAGNSLV LKPPTQGA VS
201 CLHMVHCFHL AGFPKGLISC ITGKGSEIGD FLTMHPAVNC ISFTGGDTGI
251 SISKKAGMIP LQELGGKDA CIVLEDADLD LVASNIIKGG FSYSGQRCTA
301 VKVVLMESV ADELVEKVKA KVAKLTVGPP EENC DITAVV SESSANFIEG
351 LVMDAKEKGA TFCQEKREG NLIWPLLLDN VRPDMRIAWE EPFGPVLPLVL
401 RINSVEEGIN HCNASNFLQ GCVFTKDINK AMMISDAMET GTVQINSAPA
451 RGPDHFPFQG LKDSGIGSQG VTNSINLMTK VKTTVINLPT PSYSMG

```

Matched peptides information:

| Start - End | Observed  | Mr (expt) | Mr (calc) | ppm | Miss | Sequence                         |
|-------------|-----------|-----------|-----------|-----|------|----------------------------------|
| 18 - 25     | 1047.5201 | 1046.5128 | 1046.4345 | 75  | 0    | K.YYSDGEWK.N                     |
| 32 - 41     | 1043.6601 | 1042.6528 | 1042.5771 | 73  | 0    | K.SVAIVNPSTR.K                   |
| 77 - 83     | 866.6239  | 865.6166  | 865.5134  | 119 | 1    | K.RAELLHK.A                      |
| 109 - 116   | 904.5488  | 903.5415  | 903.4662  | 83  | 0    | K.DSVTEVVR.S                     |
| 117 - 130   | 1555.7681 | 1554.7608 | 1554.6984 | 40  | 0    | R.SGDLISYCAEEGVR.I               |
| 137 - 148   | 1381.7501 | 1380.7428 | 1380.6674 | 55  | 0    | K.FLLSDSFPGNER.T                 |
| 289 - 297   | 958.5418  | 957.5345  | 957.4304  | 109 | 0    | K.GGFSYSGQR.C                    |
| 303 - 317   | 1675.9081 | 1674.9008 | 1674.8750 | 15  | 0    | K.VVLMESVADELVEK.V Oxidation (M) |
| 359 - 367   | 1103.5332 | 1102.5259 | 1102.4753 | 46  | 0    | K.GATFCQEK.R                     |
| 387 - 401   | 1722.9989 | 1721.9916 | 1721.9505 | 24  | 0    | R.IAWEEPFGPVLPLR.I               |
| 452 - 462   | 1242.6661 | 1241.6588 | 1241.6193 | 32  | 0    | R.GPDHFPFQGLK.D                  |

Spot No.: **49**

Mascot score: **82**    Sequence coverage %: **14**

NCBI accession No.: **gi| 4210334**

Matched peptides No.: **7**

Total peptides No.: **13**

Calculated Mr: **50272**

Calculated pI: **6.00**

### Annotated PMF spectra:

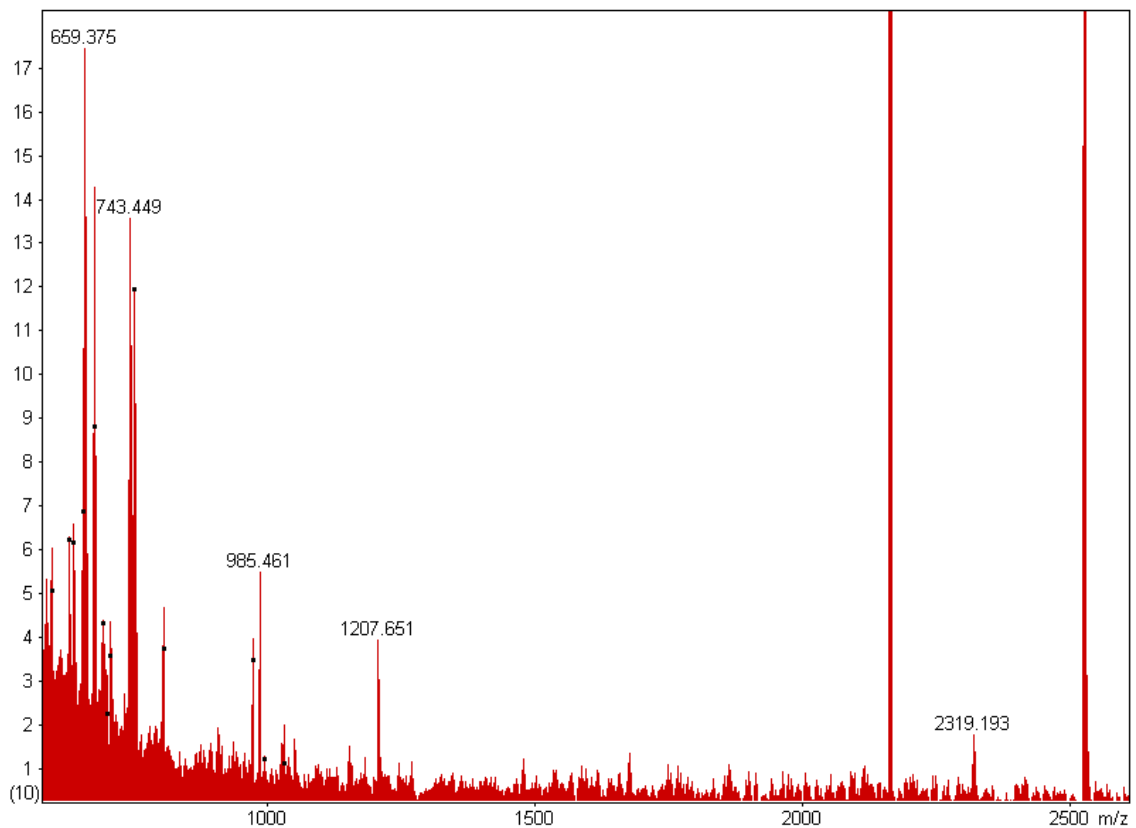

### Probability Based Mowse Score:

Protein score is  $-10 \cdot \log(P)$ , where P is the probability that the observed match is a random event. Protein scores greater than 72 are significant ( $p < 0.05$ ).

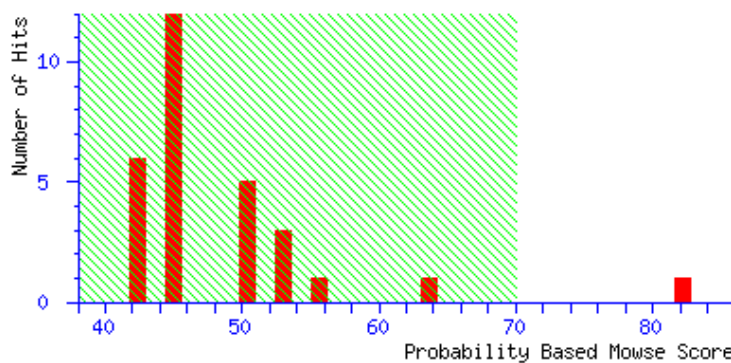

## Matched peptide sequences: shown in **Bold Red**

```

 1 FASSGSDDND VVIIGGGPGG YVAAIKAAQL GLKTTCIEKR GALGGTCLNV
 51 GCIPSKALLH SSHMYHEAKH VFANHGVKVS SVEVDLPAML AOKDTAVKNL
101 TRGVEGLFKK NKVNYVKGYG KFLSPSEVSV DTIDGENVVV KGKHIIVATG
151 SDVKSLPGIT IDEKKIVSST GALSLETEIPK KLIVIGAGYI GLEMGSVMGR
201 LGSEVTVVEF AADIVPAMDG EIRKQFQSL EKQKMKFMLK TKVVGVDSSG
251 DGVKLIVEPA EGGEQTTLA DVVLVSAGRT PFTSGLDLEK IGVETDKGGR
301 ILVNERFSTN VSGVYAIGDV IPGPMLAHKA EEDGVACVEF IAGKHGHVDY
351 DKVPGVVYTY PEVASVGKTE EQLKKEGVSY NVGKPFMAN SRAKAIDTAE
401 GMVKILADKE TDKILGVHIM SPNAGELIHE AVLAINYDAS SEDIARVCHA
451 HPTMSEAIKE AAMATYDKPI HM

```

## Matched peptides information:

| Start - End | Observed  | Mr(expt)  | Mr(calc)  | ppm | Miss | Sequence                          |
|-------------|-----------|-----------|-----------|-----|------|-----------------------------------|
| 34 - 39     | 751.3691  | 750.3618  | 750.3582  | 5   | 0    | <b>K.TTCIEK.R</b>                 |
| 122 - 143   | 2319.1934 | 2318.1861 | 2318.2006 | -6  | 1    | <b>K.FLSPSEVSVDTIDGENVVVKGK.H</b> |
| 224 - 228   | 706.3667  | 705.3594  | 705.3922  | -46 | 1    | <b>R.KQFQR.S</b>                  |
| 280 - 290   | 1207.6513 | 1206.6440 | 1206.6132 | 26  | 0    | <b>R.TPFTSGLDLEK.I</b>            |
| 291 - 300   | 1031.5327 | 1030.5254 | 1030.5407 | -15 | 1    | <b>K.IGVETDKGGR.I</b>             |
| 301 - 306   | 743.4486  | 742.4413  | 742.4337  | 10  | 0    | <b>R.ILVNER.F</b>                 |
| 385 - 392   | 985.4607  | 984.4535  | 984.4487  | 5   | 0    | <b>K.PPFMANSR.A</b> Oxidation (M) |

Spot No.: **50**

Mascot score: **150**    Sequence coverage %: **39**

NCBI accession No.: **gi| 3033398**

Matched peptides No.: **18**

Total peptides No.: **57**

Calculated Mr: **59890**

Calculated pI: **5.89**

### Annotated PMF spectra:

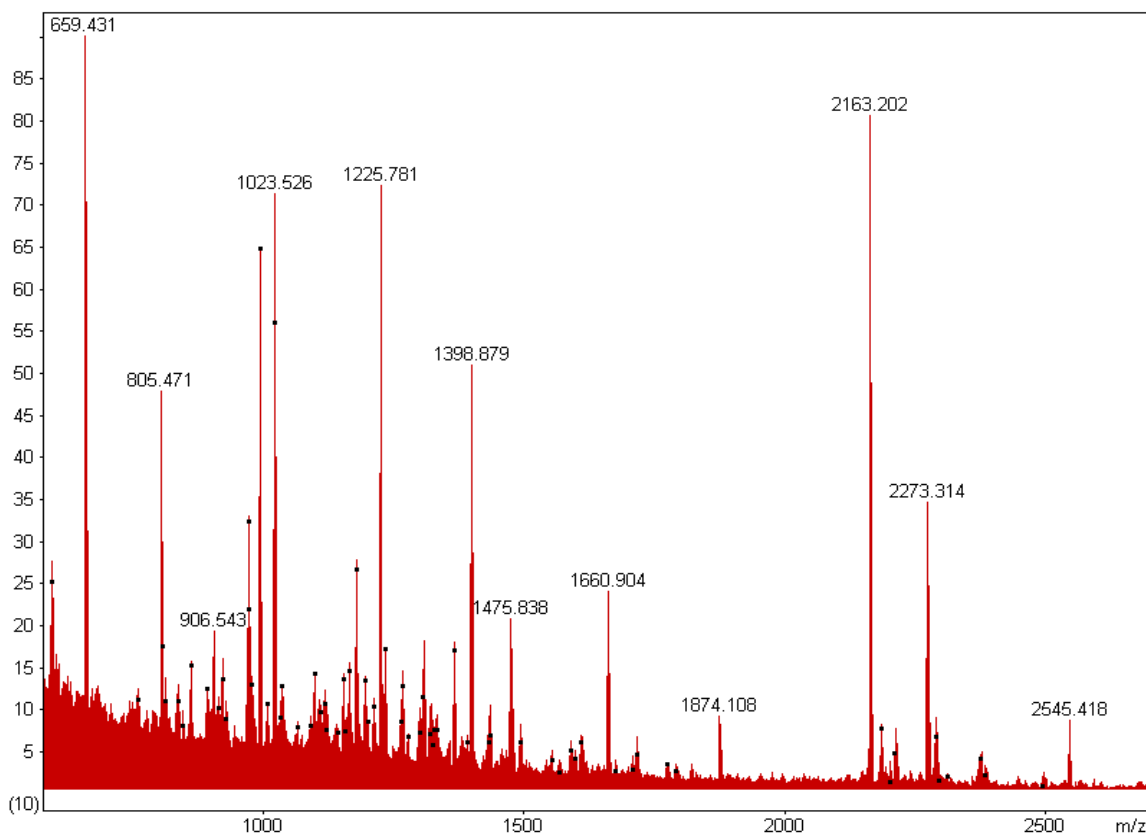

### Probability Based Mowse Score:

Protein score is  $-10 \cdot \log(P)$ , where P is the probability that the observed match is a random event. Protein scores greater than 72 are significant ( $p < 0.05$ ).

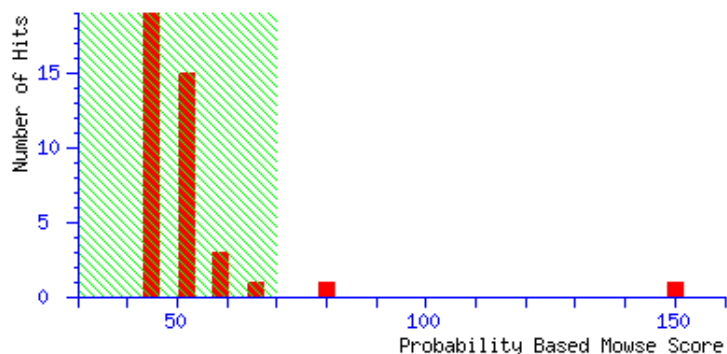

## Matched peptide sequences: shown in **Bold Red**

1 **MAESQTAQRN** QPQSSGSSGE KQALISLSDK RDLASLGNGL QELGYTIVST  
 51 GGTASTLENA GVSVTKVEKL THFPEMLDGR **VKTLHPNIHG** **GILARRDVEH**  
 101 HMEALNEHGI GTFDVVVNL YPFYEKVTAP **GGISFEDGIE** **NIDIGGPAMI**  
 151 **RAAAKNHKDV** LIVVDSGDYQ AVLEYLKGQ **SDQQFRRKLA** WKAFQHVAAY  
 201 DSAVSEWLWK QTEGKEKFPF SFTVPLVLKS SLRYGENPHQ **KAIFYVDKSL**  
 251 **AEVNAGGIAT** **AIQHHGKEMS** YNNYLDADAA WNCVSEFENP TCVVVKHTNP  
 301 **CGVASRDDIL** **EAYRLAVKAD** **PVSFAFGGIVA** **FNVEVDEVLA** **REIREFRSPT**  
 351 **DGETRMFYEI** **VVAPKYTAG** **LEVLKGSKT** LRILEAKKND QGKLSLRQVG  
 401 GGWLAQDSD LTPEDISFNS VSDKTPTESE LADAKFAWLC **VKHVKSNAIV**  
 451 **IAKNNCLGM** **GSGQPNRVES** LRIAFKKAGE **EAKGAALASD** **AFPPFAWKDA**  
 501 **VEEACQMIG** VIAEPGGSIR DQDAIDCCK **YGVSLLEFTNV** **RHFRH**

## Matched peptides information:

| Start - End | Observed  | Mr (expt) | Mr (calc) | ppm | Miss | Sequence                                    |
|-------------|-----------|-----------|-----------|-----|------|---------------------------------------------|
| 1 - 9       | 1037.5782 | 1036.5709 | 1036.4607 | 106 | 0    | -.MAESQTAQR.N Oxidation (M)                 |
| 83 - 95     | 1398.8785 | 1397.8712 | 1397.7892 | 59  | 0    | K.TLHPNIHGGILAR.R                           |
| 127 - 151   | 2545.4182 | 2544.4109 | 2544.2530 | 62  | 0    | K.VTAPGGISFEDGIENIDIGGPAMIR.A Oxidation (M) |
| 178 - 186   | 1022.5378 | 1021.5305 | 1021.4577 | 71  | 0    | K.GGQSDQQFR.R                               |
| 234 - 241   | 972.5302  | 971.5229  | 971.4461  | 79  | 0    | R.YGENPHQK.A                                |
| 242 - 248   | 813.4564  | 812.4492  | 812.4068  | 52  | 0    | K.AAIFYVDK.S                                |
| 249 - 267   | 1874.1085 | 1873.1012 | 1872.9806 | 64  | 0    | K.SLAEVNAGGIATAIQHHGK.E                     |
| 297 - 306   | 1098.5943 | 1097.5870 | 1097.5036 | 76  | 0    | K.HTNPCGVASR.D                              |
| 307 - 314   | 994.5604  | 993.5531  | 993.4767  | 77  | 0    | R.DDILEAYR.L                                |
| 319 - 341   | 2375.3715 | 2374.3642 | 2374.2169 | 62  | 0    | K.ADPVSFAFGGIVAFNVEVDEVLAR.E                |
| 348 - 355   | 862.4622  | 861.4550  | 861.3828  | 84  | 0    | R.SPTDGETR.M                                |
| 356 - 365   | 1212.6793 | 1211.6720 | 1211.6260 | 38  | 0    | R.MFYEIVVAPK.Y Oxidation (M)                |
| 366 - 375   | 1121.6440 | 1120.6367 | 1120.6492 | -11 | 1    | K.YTAGGLEVLK.G                              |
| 443 - 453   | 1179.6819 | 1178.6746 | 1178.7135 | -33 | 1    | K.HVKSNAIVIAK.N                             |
| 454 - 467   | 1567.8017 | 1566.7944 | 1566.6337 | 103 | 0    | K.NNCMLGMGSGQPNR.V 2 Oxidation (M)          |
| 484 - 498   | 1598.8870 | 1597.8797 | 1597.7929 | 54  | 0    | K.GAALASDAFFPPFAWK.D                        |
| 531 - 541   | 1268.7698 | 1267.7625 | 1267.6925 | 55  | 0    | K.YGVSLLEFTNVR.H                            |
| 542 - 545   | 596.3379  | 595.3306  | 595.2979  | 55  | 1    | R.HFRH.-                                    |

Spot No.: 51

Mascot score: 111 Sequence coverage %: 34

NCBI accession No.: gi| 22417145

Matched peptides No.: 15

Total peptides No.: 66

Calculated Mr: 41355

Calculated pI: 10.68

### Annotated PMF spectra:

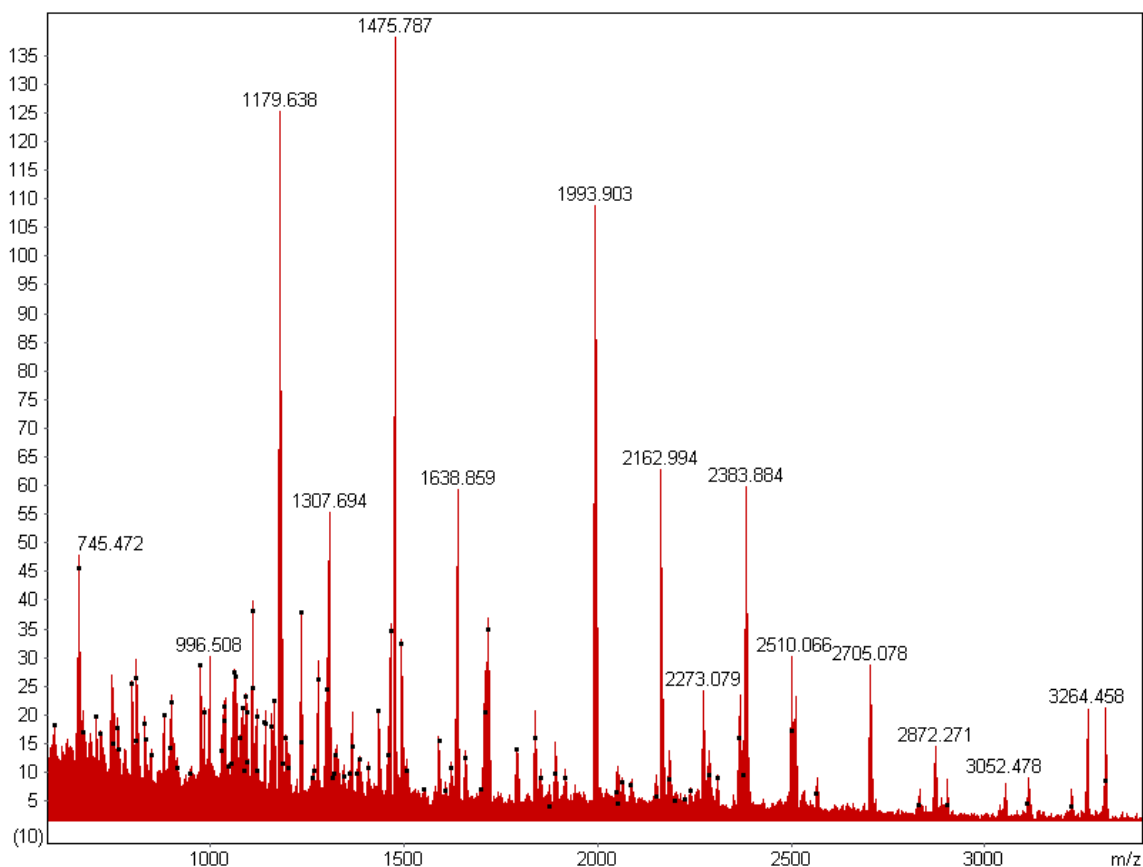

### Probability Based Mowse Score:

Protein score is  $-10 \cdot \log(P)$ , where P is the probability that the observed match is a random event. Protein scores greater than 72 are significant ( $p < 0.05$ ).

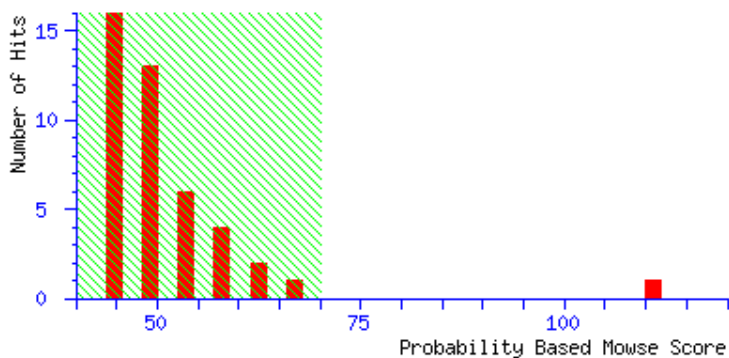

Matched peptide sequences: shown in **Bold Red**

**1** **MQQQLYRQTI RHQHQLLHAR** GPSLASTSGR PCARPAGDSR RSLRCYSYTT  
**51** GSSSLESHPV KRAFLSIGVS PNDLERAARL EPSVLAVDKL DRLHGMIDLL  
**101** LGASLSPSDI GQVLLAYPQA FQLSLDR**ARE VLDFLRDDMH LSESQVRTVL**  
**151** **TRYP**SILNMN **VKG**QLRPQVA YLNSLGVGPE SLPELVLSRP LVLGPGIDTV  
**201** ITFLKRLGVP **RSQMHRMLRS** CPLDYRVQFK SFSAAAAPGGS SSSSSSGGMG  
**251** RNYWR**QGAGG** **AGRRMVD**CWA **PLAATAAAPR** HVKCTSAVNI LLLSGCSRLA  
**301** **YRPGR**LPPAR **KAPGIGANME CAHVGAPRSP** RWSLERVGDQ **QRRCIQASGL**  
**351** **ERLQR**MAAH **TGPRR**WACEW QGP

Matched peptides information:

| Start - End | Observed  | Mr(expt)  | Mr(calc)  | ppm | Miss Sequence                            |
|-------------|-----------|-----------|-----------|-----|------------------------------------------|
| 1 - 7       | 982.4867  | 981.4794  | 981.4702  | 9   | 0 -.MQQQLYR.Q Oxidation (M)              |
| 1 - 11      | 1464.8502 | 1463.8429 | 1463.7667 | 52  | 1 -.MQQQLYRQTIR.H                        |
| 12 - 20     | 1139.5504 | 1138.5431 | 1138.6108 | -59 | 0 R.RHQHQLLHAR.G                         |
| 128 - 136   | 1118.5578 | 1117.5505 | 1117.6244 | -66 | 1 R.AREVLDFLR.D                          |
| 137 - 147   | 1316.5907 | 1315.5834 | 1315.5827 | 1   | 0 R.DDMHLSSESQVR.T                       |
| 153 - 162   | 1194.6218 | 1193.6145 | 1193.6114 | 3   | 0 R.YPSILNMNVK.G Oxidation (M)           |
| 212 - 219   | 1090.5682 | 1089.5609 | 1089.5172 | 40  | 1 R.SQMHRMLR.S 2 Oxidation (M)           |
| 256 - 264   | 829.3700  | 828.3627  | 828.4314  | -83 | 1 R.QGAGGAGRR.M                          |
| 265 - 280   | 1716.8163 | 1715.8090 | 1715.8123 | -2  | 0 R.MVDCWAPLAATAAAPR.H Oxidation (M)     |
| 299 - 305   | 832.5422  | 831.5350  | 831.4715  | 76  | 0 R.LAYRPGR.L                            |
| 311 - 328   | 1851.8810 | 1850.8737 | 1850.8880 | -8  | 1 R.KAPGIGANMECAHVGAPR.S Oxidation (M)   |
| 312 - 328   | 1707.7387 | 1706.7314 | 1706.7981 | -39 | 0 K.APGIGANMECAHVGAPR.S                  |
| 312 - 331   | 2064.0289 | 2063.0216 | 2062.9789 | 21  | 1 K.APGIGANMECAHVGAPRSPR.W Oxidation (M) |
| 344 - 352   | 1033.5514 | 1032.5441 | 1032.5022 | 41  | 0 R.CIQASGLER.L                          |
| 357 - 365   | 996.5082  | 995.5009  | 995.5083  | -7  | 1 R.MAAHTGPRR.W                          |

Spot No.: 52

Mascot score: 92 Sequence coverage %: 17

NCBI accession No.: gi| 30693102

Matched peptides No.: 12

Total peptides No.: 30

Calculated Mr: 82214

Calculated pI: 6.24

### Annotated PMF spectra:

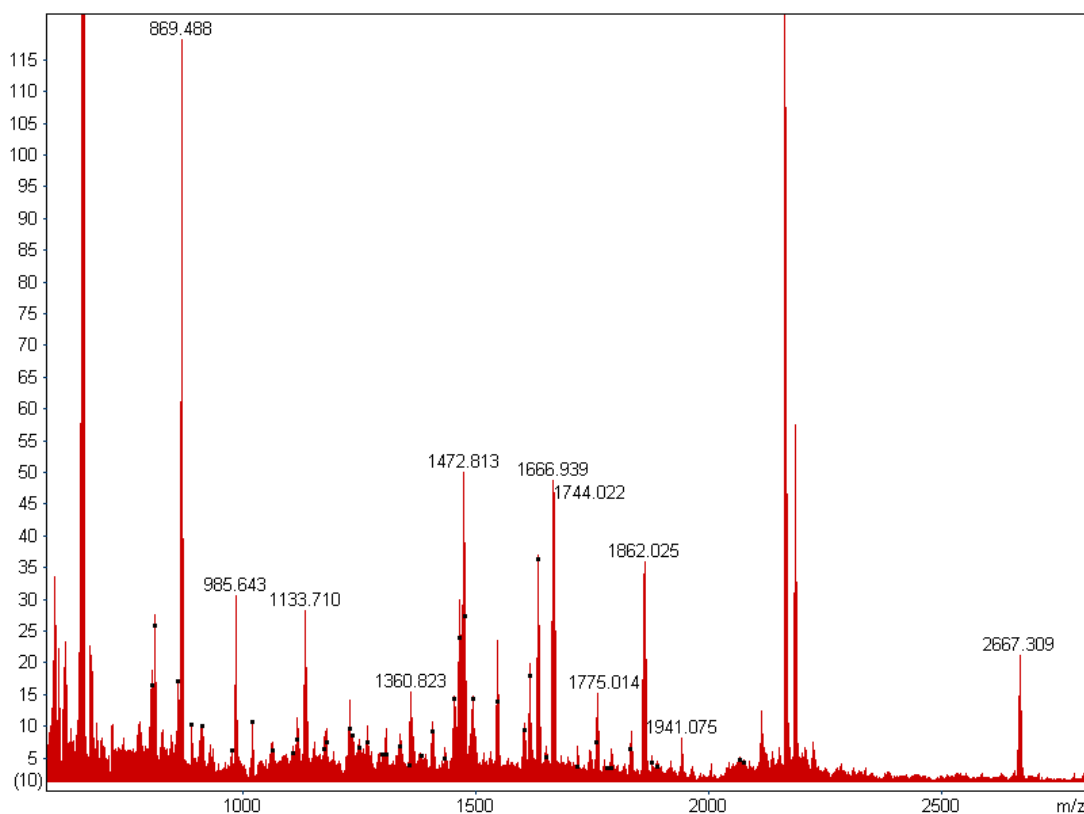

### Probability Based Mowse Score:

Protein score is  $-10 \cdot \log(P)$ , where P is the probability that the observed match is a random event. Protein scores greater than 72 are significant ( $p < 0.05$ ).

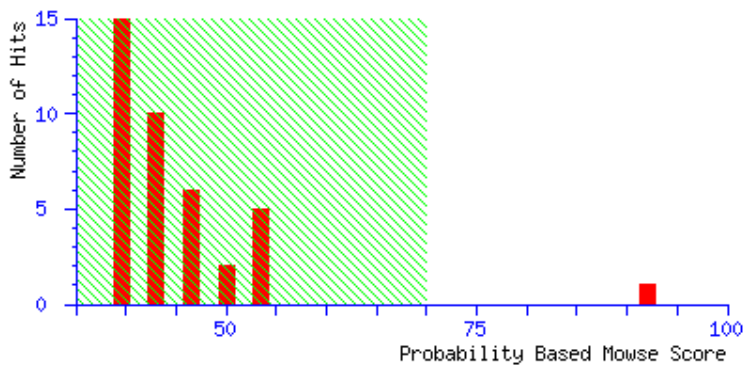



## Matched peptide sequences: shown in **Bold Red**

```

 1 MGLGILASRT IRPASRLLOS QTSNFFLRTI VSKPELQSPE SAAVSEPEPP
 51 TQILPPRNPV GGARVHFSNP EDAIEVFDG YAVKVPKGFT VLQACEVAGV
101 DIPRFFCYHSR LSIAGNCRMC LVEVEKSPKP VASCAMPALP GMKIKTDTPI
151 AKKAREGVME FLLMNHPLDC PICDQGGECD LQDQSMAFGS DRGRFTEMKR
201 SVVDKNLGPL VKTVMTRCIQ CTRCVRFASE VAGVQDLGIL GRGSGEEIGT
251 YVEKLMTSEL SGNVIDICPV GALTSPKFAF KARNWELKAT ETIDVSDAVG
301 SNIRVDSRGP EVMRIIPRLN EDINEEWISD KTRFCYDGLK RQRLSDPMIR
351 DSDGRFKAVS WRDALAVVGD IIHQVKPDEI VGVAGQLSDA ESMHVLKDFV
401 NRMGSDNVWC EGTAAGVDAD LRYSYLMNTS ISGLENADLF LLIQTQPRVE
451 AAMVNARICK TVRASNAKVG YVGPPAEFNY DCKHLGTGPD TLKEIAEGRH
501 PFCTALKNK NPATIVGAGL FNRTDKNAIL SSVESIAQAN NVVRPDWNL
551 NFLLQYAAQA AALDLGLIQQ SAKALESKAF VYLMGADDVN VDKIPKDAFV
601 VYQGHGDKA VYRANVILPA SAFTEKEGTY ENTEGETTQQT VPAVPTVGDA
651 RDDWKIVRAL SEVSGVKLPY NSIEGVRSLI KSVAPNLVHT DEREPAAFGP
701 SLKPECKEAM STTPFQTVVE NPYMTNSITR ASKIMAQCSA VLLKK

```

## Matched peptides information:

| Start - End | Observed  | Mr(expt)  | Mr(calc)  | ppm | Miss | Sequence                      |
|-------------|-----------|-----------|-----------|-----|------|-------------------------------|
| 105 - 110   | 869.4882  | 868.4810  | 868.3650  | 134 | 0    | R.FCYHSR.L                    |
| 111 - 118   | 890.5136  | 889.5063  | 889.4440  | 70  | 0    | R.LSIAGNCR.M                  |
| 201 - 212   | 1268.7294 | 1267.7221 | 1267.7500 | -22 | 1    | R.SVVDKNLGPLVK.T              |
| 319 - 331   | 1604.9052 | 1603.8979 | 1603.7365 | 101 | 0    | R.LNEDINEEWISDK.T             |
| 319 - 333   | 1862.0254 | 1861.0181 | 1860.8853 | 71  | 1    | R.LNEDINEEWISDKTR.F           |
| 398 - 402   | 650.3375  | 649.3302  | 649.3184  | 18  | 0    | K.DFVNR.M                     |
| 449 - 457   | 976.6086  | 975.6014  | 975.4807  | 124 | 0    | R.VEAAMVNAR.I Oxidation (M)   |
| 597 - 609   | 1472.8129 | 1471.8056 | 1471.6844 | 82  | 0    | K.DAFVYQGHGDK.A               |
| 614 - 626   | 1360.8234 | 1359.8161 | 1359.7398 | 56  | 0    | R.ANVILPASAFTEK.E             |
| 627 - 651   | 2667.3086 | 2666.3013 | 2666.2460 | 21  | 0    | K.EGTYENTEGETTQQTVPVPTVGDAR.D |
| 682 - 693   | 1337.7721 | 1336.7648 | 1336.6735 | 68  | 0    | K.SVAPNLVHTDER.E              |
| 734 - 744   | 1249.7812 | 1248.7739 | 1248.6570 | 94  | 0    | K.IMAQCSAVLLK.K Oxidation (M) |

Spot No.: **53**

Mascot score: **85** Sequence coverage %: **19**

NCBI accession No.: **gi| 152207441**

Matched peptides No.: **10**

Total peptides No.: **19**

Calculated Mr: **62750**

Calculated pI: **8.71**

### Annotated PMF spectra:

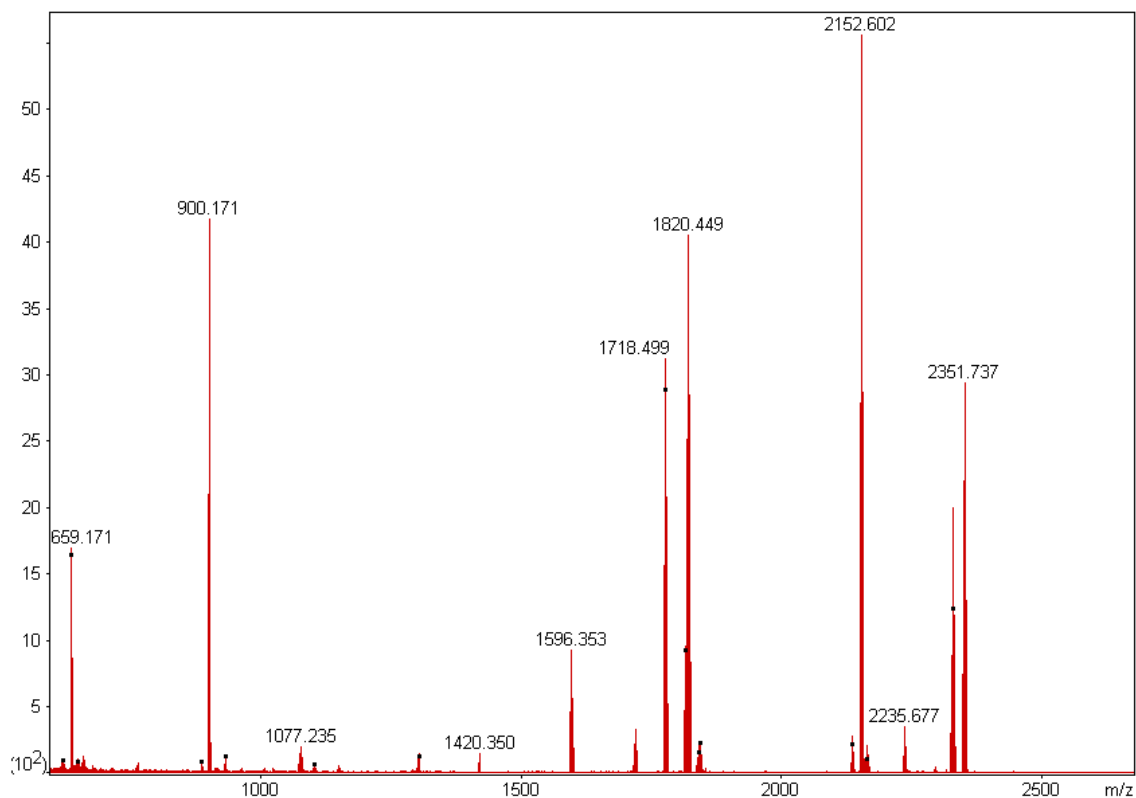

### Probability Based Mowse Score:

Protein score is  $-10 \cdot \log(P)$ , where P is the probability that the observed match is a random event. Protein scores greater than 72 are significant ( $p < 0.05$ ).

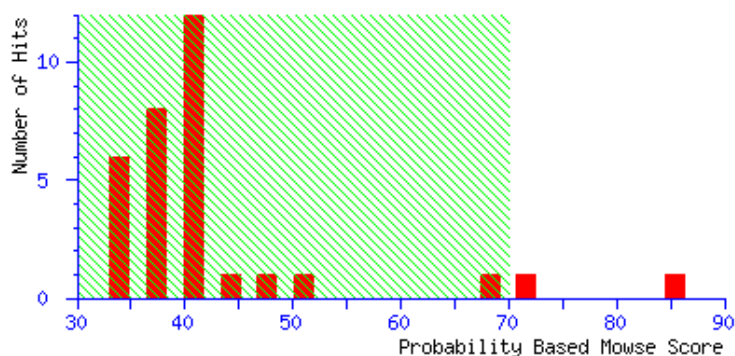

## Matched peptide sequences: shown in **Bold Red**

```

 1 MKLLHGLALV FLLAAASCKA DEEITCEENN PFTCSNTDIL SSKNFGKDFI
 51 FGVASSAYQI EGGRGRGVNV WDGFSHRYPE KSGSDLKNGD TTCESYTRWQ
101 KDVDVMGELN ATGYRFSFAW SRIIPKGKVS RGVNQGLDY YHKLIDALLE
151 KNITPFVTLF PWDLPQTLQD EYEGFLNRTV IDDFRDYADL CFKEFGGKVK
201 NWITINQLYT VPTRGYAIGT DAPGRCSPEV DEKCYGGNSS TEPYIVAHNQ
251 LLAHAAAVDV YRTKYKFQKG KIGPVMITRW FLPFDKTDQA SRDAANRMKE
301 FFLGRFMDPL TKGRYPDIMR EIVGSRLPNF TEAEAELVAG SYDFLGLNYY
351 TTQYAQPKPN PVTWANHTAM MDPGAKLTYN NSRGENLGPL FVKDEKNGNA
401 YYYPKGIYYV MDYFKNKYNN PLIYITENGF STPGKETREE AVADSKRIDY
451 LCSHLCFLRK VIREKGVNIK GYFAWALGDN YEFCKGFTVR FGLSYVNWTD
501 LNDRNLLKSG KWYQSFINGT TKNPAKQDFR RPNLSLRNQK KNLADA

```

## Matched peptides information:

| Start - End | Observed  | Mr(expt)  | Mr(calc)  | ppm  | Miss | Sequence                 |
|-------------|-----------|-----------|-----------|------|------|--------------------------|
| 48 - 64     | 1816.4417 | 1815.4344 | 1815.8792 | -245 | 0    | K.DFIFGVASSAYQIEGGR.G    |
| 88 - 98     | 1303.2597 | 1302.2524 | 1302.5146 | -201 | 0    | K.NGDTTCESYTR.W          |
| 116 - 122   | 900.1711  | 899.1638  | 899.4290  | -295 | 0    | R.FSFAWSR.I              |
| 201 - 214   | 1718.4988 | 1717.4915 | 1717.9151 | -247 | 0    | K.NWITINQLYTVPTR.G       |
| 215 - 225   | 1077.2347 | 1076.2274 | 1076.5251 | -276 | 0    | R.GYAIGTDAPGR.C          |
| 272 - 279   | 886.2540  | 885.2467  | 885.5106  | -298 | 0    | K.IGPVMITR.W             |
| 272 - 286   | 1820.4485 | 1819.4412 | 1818.9855 | 251  | 1    | K.IGPVMITRWFLPFDK.T      |
| 448 - 459   | 1596.3534 | 1595.3461 | 1595.7588 | -259 | 0    | R.IDYLCSHLCFLR.K         |
| 466 - 485   | 2351.7368 | 2350.7295 | 2351.1045 | -159 | 1    | K.GVNIKGYFAWALGDNYEFCK.G |
| 471 - 485   | 1840.3942 | 1839.3869 | 1839.7926 | -221 | 0    | K.GYFAWALGDNYEFCK.G      |

Spot No.: **54**

Mascot score: **122** Sequence coverage %: **21**

NCBI accession No.: **gi| 15226573**

Matched peptides No.: **16**

Total peptides No.: **38**

Calculated Mr: **65977**

Calculated pI: **5.95**

### Annotated PMF spectra:

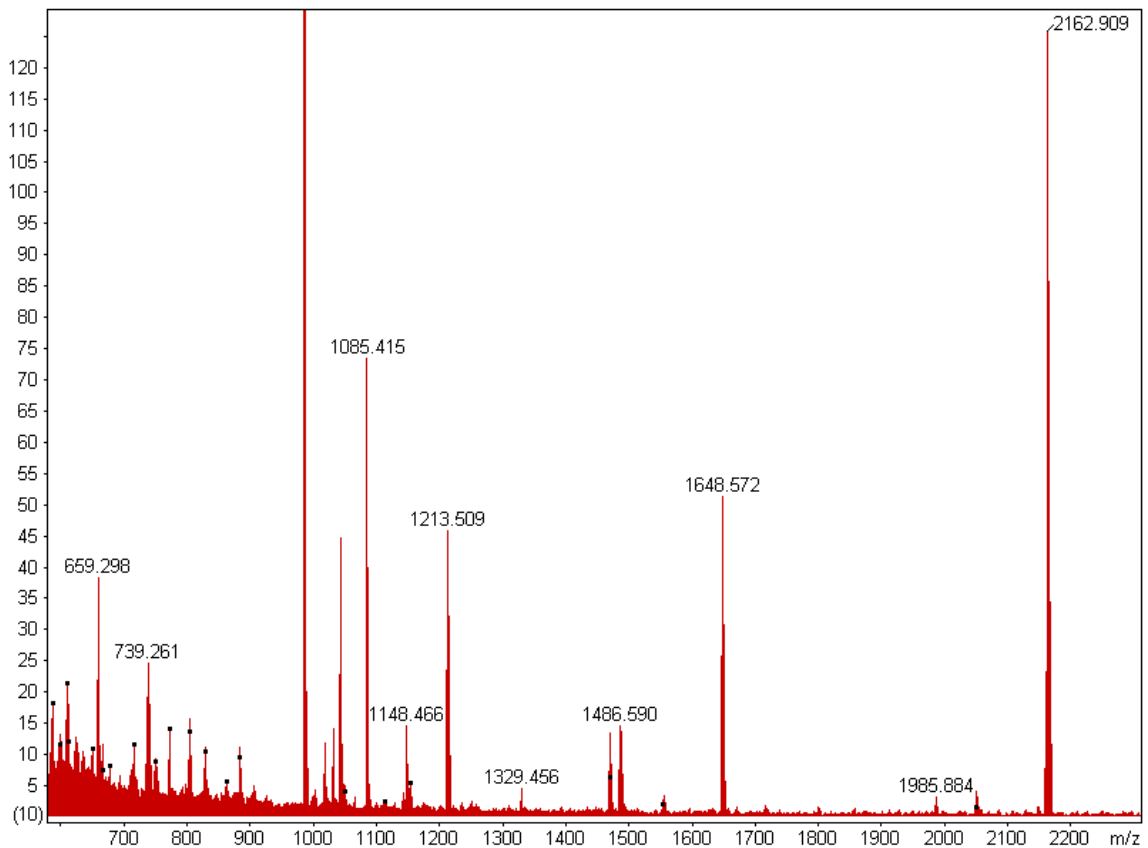

### Probability Based Mowse Score:

Protein score is  $-10 \cdot \log(P)$ , where P is the probability that the observed match is a random event. Protein scores greater than 72 are significant ( $p < 0.05$ ).

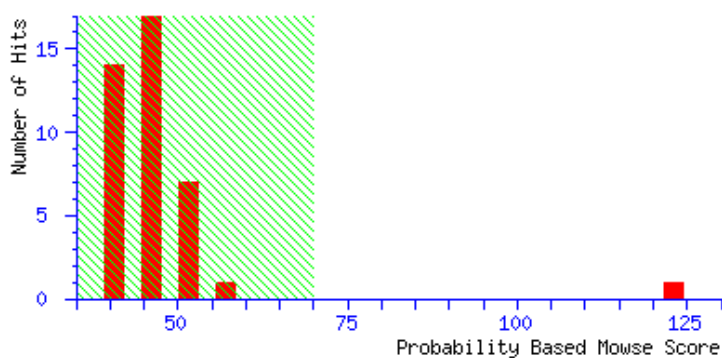

## Matched peptide sequences: shown in **Bold Red**

**1** MTSFSLTFTS PLLPSSSTKP KRSVLVAAAQ TTAPAESTAS VDADRLEPRV  
**51** ELK**DGFFILK** **EK**FRKGINPQ EKVKIEREPM KLFMENGIEE LAKKSMEELD  
**101** SEKSSKDDID VRLKWLGLFH RRR**HQYGKFM** **MRL**KLPNGVT TSAQTRYLAS  
**151** VIR**KYGEDGC** **ADV**TTRQNWQ **IR**GVVLPDVP EILKGLASVG LTSLSQSGMDN  
**201** VRNPVGNPIA GIDPEEIVDT RPYTNLLSQF ITANSQGNPD FTNLPRKWNV  
**251** CVVGT HDLYE HPHINDLAYM PANKDGRFGF NLLVGGFFSP KRCEEAIPLD  
**301** AWVPADDVLP LCK**AVLEAYR** DLGTRGNRQK TRMMWLIDEL GVEGFRTEVE  
**351** KR**MPNGKLER** GSSEDLVNKQ **WER**RDYFGVN POKQEGLSFV GLHVPVGR**LQ**  
**401** **ADD**MDELARL **AD**TYGSGELR LTVEQNIIP NVETSK**TEAL** **LQEP**FLKNRF  
**451** **SPE**PSILMKG LVACTGSQFC GQAIETKLR **ALK**VTEEVER **LVS**VPRPIRM  
**501** HWTGCPNTCG QVQVADIGFM GCLTRGEEGK PVEGADVYVG GRIGSDSHIG  
**551** EIYKKGVRVT ELVPLVAEIL IK**EF**GA**VP**RE REENED

## Matched peptides information:

| Start - End | Observed  | Mr(expt)  | Mr(calc)  | ppm  | Miss | Sequence                      |
|-------------|-----------|-----------|-----------|------|------|-------------------------------|
| 54 - 62     | 1096.5306 | 1095.5233 | 1095.5964 | -67  | 1    | K.DGFFILKEK.F                 |
| 124 - 128   | 632.1762  | 631.1689  | 631.3078  | -220 | 0    | K.HQYGK.F                     |
| 129 - 132   | 616.1673  | 615.1600  | 615.2509  | -148 | 0    | K.FMMR.L 2 Oxidation (M)      |
| 154 - 166   | 1471.6892 | 1470.6819 | 1470.6409 | 28   | 1    | R.KYGEDGCADVTTTR.Q            |
| 167 - 172   | 844.3762  | 843.3689  | 843.4351  | -78  | 0    | R.QNWQIR.G                    |
| 314 - 320   | 821.4000  | 820.3928  | 820.4443  | -63  | 0    | K.AVLEAYR.D                   |
| 353 - 360   | 960.4351  | 959.4278  | 959.4858  | -60  | 1    | R.MPNGKLER.G Oxidation (M)    |
| 370 - 373   | 618.1882  | 617.1809  | 617.2921  | -180 | 0    | K.QWER.R                      |
| 399 - 409   | 1292.6038 | 1291.5965 | 1291.5714 | 19   | 0    | R.LQADDMDELAR.L Oxidation (M) |
| 410 - 420   | 1181.5678 | 1180.5605 | 1180.5724 | -10  | 0    | R.LADTYGSGELR.L               |
| 437 - 447   | 1288.7068 | 1287.6995 | 1287.7074 | -6   | 0    | K.TEALLQEPFLK.N               |
| 450 - 459   | 1164.5655 | 1163.5582 | 1163.5896 | -27  | 0    | R.FSPEPSILMK.G Oxidation (M)  |
| 481 - 490   | 1173.6210 | 1172.6137 | 1172.6401 | -22  | 1    | R.ALKVTEEVER.L                |
| 484 - 490   | 861.3721  | 860.3649  | 860.4239  | -69  | 0    | K.VTEEVER.L                   |
| 491 - 499   | 1036.5015 | 1035.4942 | 1035.6553 | -156 | 0    | R.LVSVPRPIR.M                 |
| 573 - 579   | 775.3327  | 774.3254  | 774.4024  | -99  | 0    | K.EFGAVPR.E                   |

Spot No.: **55**

Mascot score: **143**    Sequence coverage %: **34**

NCBI accession No.: **gi| 23397093**

Matched peptides No.: **22**

Total peptides No.: **87**

Calculated Mr: **65878**

Calculated pI: **5.85**

### Annotated PMF spectra:

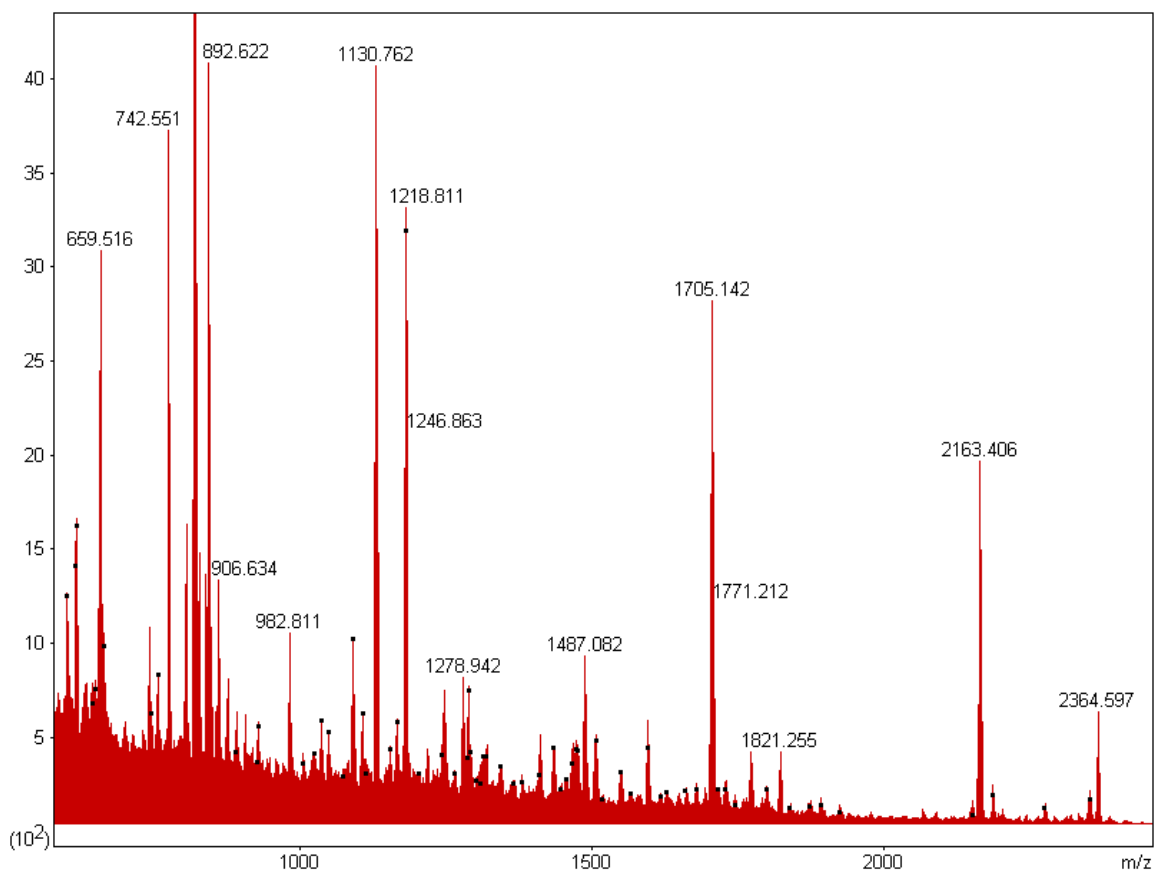

### Probability Based Mowse Score:

Protein score is  $-10 \cdot \log(P)$ , where  $P$  is the probability that the observed match is a random event. Protein scores greater than 72 are significant ( $p < 0.05$ ).

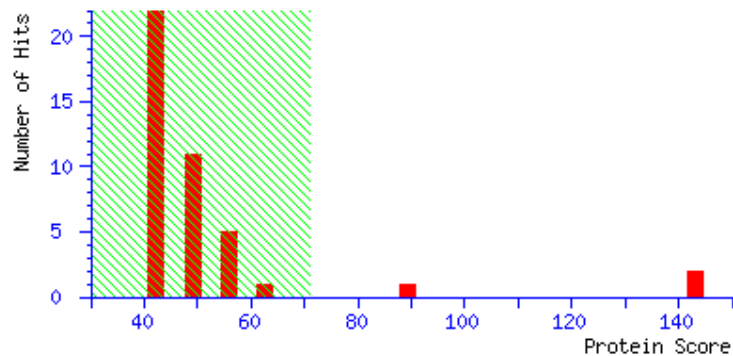

Matched peptide sequences: shown in **Bold Red**

**1** MTSFSLTFTS PLLSSSTKP KRSVLVAAAQ TTAPAESTAS VDADRLEPRV  
**51** ELK**DGFFILK EKFRKGINPQ** EKVKIEREPM KLFMENGIEE LAKKSMEELD  
**101** SEKSSKDDID VRLKWLGLFH RRK**HQYGKFM MRLKLPNGVT** TSAQTRYLAS  
**151** VIR**KYGEDGC ADVTTRQNWQ** IRGVVLPDVP EILKGLASVG LTSLSQSGMDN  
**201** VRNPVGNPIA GIDPEEIVDT RPYTNLLSQF ITANSQGNPD FTNLPRKWNV  
**251** CVVGTHTDLYE HPHINDLAYM PANKDGRFGF NLLVGGFFSP KRCEEAIPLD  
**301** AWVPADDVLP LCK**AVLEAYR** DLGTRGNRQK TRMMWLIDEL GVEGFRTEVE  
**351** KR**MPNGKLER** GSSEDLVNK**Q WER**RDYFGVN POKQEGLSFV GLHVPVGR**LQ**  
**401** **ADDMDDELARL ADTYGSGELR** LTVEQNIIP NVETSK**TEAL LQEPFLKNRF**  
**451** **SPEPSILMKG** LVACTGSQFC GQAIETKLR **ALKVTEEVER** **LVSVPRPIRM**  
**501** HWTGCPNTCG QVQVADIGFM GCLTRGEEGK PVEGADVYVG GRIGSDSHIG  
**551** EIYKKGVRVT ELVPLVAEIL **KEFGAVPRE** REENED

Matched peptides information:

| Start - End | Observed  | Mr(expt)  | Mr(calc)  | ppm  | Miss Sequence                    |
|-------------|-----------|-----------|-----------|------|----------------------------------|
| 54 - 62     | 1096.5306 | 1095.5233 | 1095.5964 | -67  | 1 K.DGFFILKEK.F                  |
| 124 - 128   | 632.1762  | 631.1689  | 631.3078  | -220 | 0 K.HQYGK.F                      |
| 129 - 132   | 616.1673  | 615.1600  | 615.2509  | -148 | 0 K.FMMR.L 2 Oxidation (M)       |
| 154 - 166   | 1471.6892 | 1470.6819 | 1470.6409 | 28   | 1 R.KYGEDGCADVTTR.Q              |
| 167 - 172   | 844.3762  | 843.3689  | 843.4351  | -78  | 0 R.QNWQIR.G                     |
| 314 - 320   | 821.4000  | 820.3928  | 820.4443  | -63  | 0 K.AVLEAYR.D                    |
| 353 - 360   | 960.4351  | 959.4278  | 959.4858  | -60  | 1 R.MPNGKLER.G Oxidation (M)     |
| 370 - 373   | 618.1882  | 617.1809  | 617.2921  | -180 | 0 K.QWER.R                       |
| 399 - 409   | 1292.6038 | 1291.5965 | 1291.5714 | 19   | 0 R.LQADDMDDELAR.L Oxidation (M) |
| 410 - 420   | 1181.5678 | 1180.5605 | 1180.5724 | -10  | 0 R.LADTYGSGELR.L                |
| 437 - 447   | 1288.7068 | 1287.6995 | 1287.7074 | -6   | 0 K.TEALLQEPFLK.N                |
| 450 - 459   | 1164.5655 | 1163.5582 | 1163.5896 | -27  | 0 R.FSPEPSILMK.G Oxidation (M)   |
| 481 - 490   | 1173.6210 | 1172.6137 | 1172.6401 | -22  | 1 R.ALKVTEEVER.L                 |
| 484 - 490   | 861.3721  | 860.3649  | 860.4239  | -69  | 0 K.VTEEVER.L                    |
| 491 - 499   | 1036.5015 | 1035.4942 | 1035.6553 | -156 | 0 R.LVSVPRPIR.M                  |
| 573 - 579   | 775.3327  | 774.3254  | 774.4024  | -99  | 0 K.EFGAVPR.E                    |

Spot No.: **56**

Mascot score: **98**    Sequence coverage %: **21**

NCBI accession No.: **gi| 5817375**

Matched peptides No.: **9**

Total peptides No.: **20**

Calculated Mr: **49130**

Calculated pI: **6.74**

### Annotated PMF spectra:

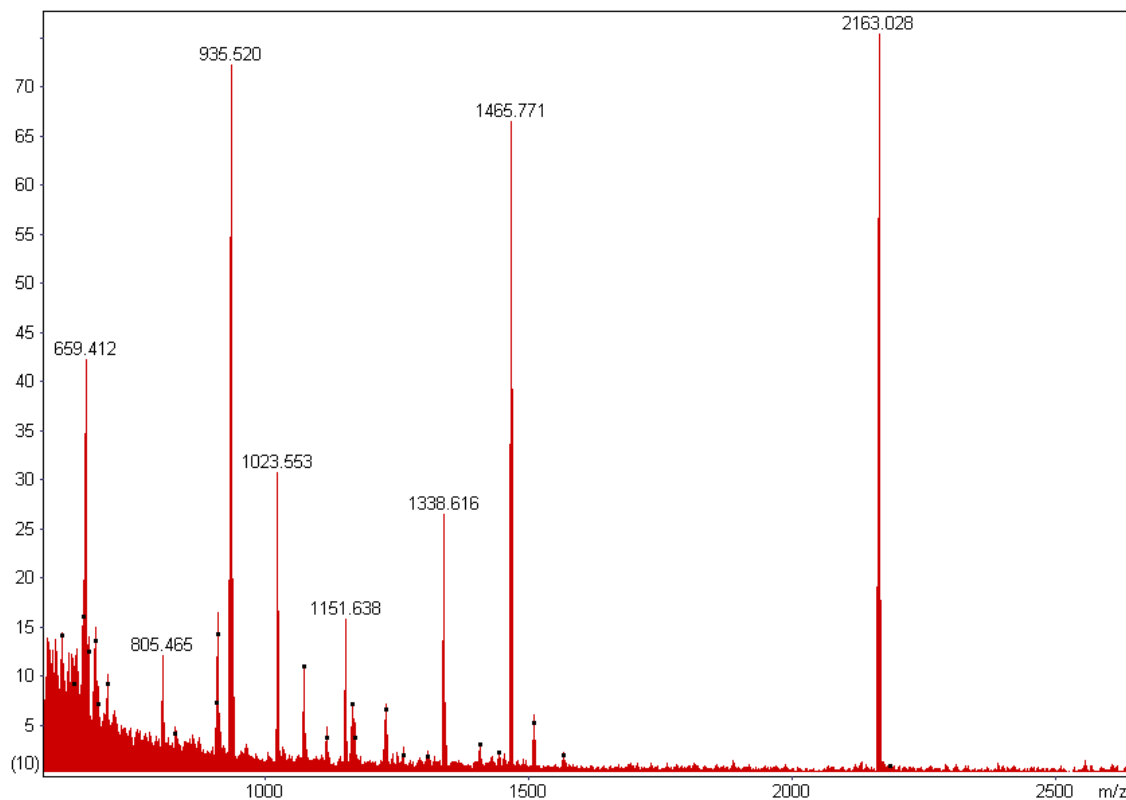

### Probability Based Mowse Score:

Protein score is  $-10 \cdot \log(P)$ , where P is the probability that the observed match is a random event. Protein scores greater than 72 are significant ( $p < 0.05$ ).

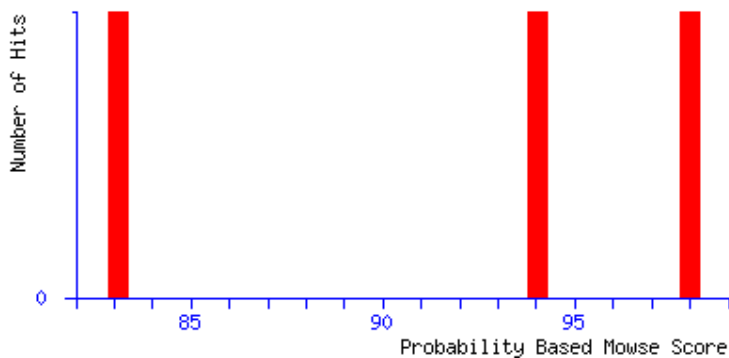



Matched peptide sequences: shown in **Bold Red**

**1 VGFKAGVKNY KLTYYTPEYE TKD**TDILAAF RVTPQPGVPP EEAGAAVA  
**51 SSTGTWTTVM TDGLTSLDRY KGR**CYNIEPV PGEPDQYICY VAYPLDLFEE  
**101 GSVTNMFTSI VGNVFGFKAL RALR**LEDLRI PPAYTK**TFQG PPHGIQVERD**  
**151 KLNKYGRPLL GCTIKPKLGL SAKNYGRAVY ECLRGGLDFT KDDENVNSQP**  
**201 FMRWRDRFLF CAEAIYKAQA ETGEIKGHYL NATAGTCEEM MKRAIFAREL**  
**251 GVPIVMHDYL TGGFTANTSL AHYCRDNGLL LHIHRAMHAV IDRQKNHGIH**  
**301 FRVLAKALRM SGGDHIHSGT VVGKLEGERD ITLGFVDLLR DDFIKQDRSR**  
**351 GIYFTQDWVS LPGVIPVAVS GIHVWHMPAL TEIFGDDSVL QFGGGTLGHP**  
**401 WGNAPGAVAN RVALEACVQA RNEGRDLAAE GNVIIREACK**

Matched peptides information:

| Start - End | Observed  | Mr(expt)  | Mr(calc)  | ppm | Miss | Sequence                                      |
|-------------|-----------|-----------|-----------|-----|------|-----------------------------------------------|
| 1 - 8       | 805.4645  | 804.4572  | 804.4858  | -35 | 1    | -.VGFKAGVK.N                                  |
| 12 - 22     | 1407.7148 | 1406.7075 | 1406.6605 | 33  | 0    | K.LTYYTPEYETK.D                               |
| 137 - 149   | 1465.7711 | 1464.7638 | 1464.7474 | 11  | 0    | K.TFQGGPPHGIQVER.D                            |
| 178 - 184   | 910.4837  | 909.4764  | 909.4378  | 42  | 0    | R.AVYECLR.G                                   |
| 185 - 203   | 2186.0387 | 2185.0314 | 2184.9746 | 26  | 1    | R.GGLDFTKDDENVNSQP <b>FMR.W</b> Oxidation (M) |
| 330 - 340   | 1261.6879 | 1260.6806 | 1260.7078 | -22 | 0    | R.DITLGFVDLLR.D                               |
| 341 - 345   | 637.3738  | 636.3665  | 636.3119  | 86  | 0    | R.DDFIK.Q                                     |
| 412 - 421   | 1116.6649 | 1115.6576 | 1115.5757 | 73  | 0    | R.VALEACVQAR.N                                |
| 426 - 436   | 1170.6871 | 1169.6798 | 1169.6404 | 34  | 0    | R.DLAAEGNVIIR.E                               |

Spot No.: **57**

Mascot score: **112** Sequence coverage %: **43**

NCBI accession No.: **gi| 13431553**

Matched peptides No.: **19**

Total peptides No.: **114**

Calculated Mr: **44111**

Calculated pI: **6.24**

### Annotated PMF spectra:

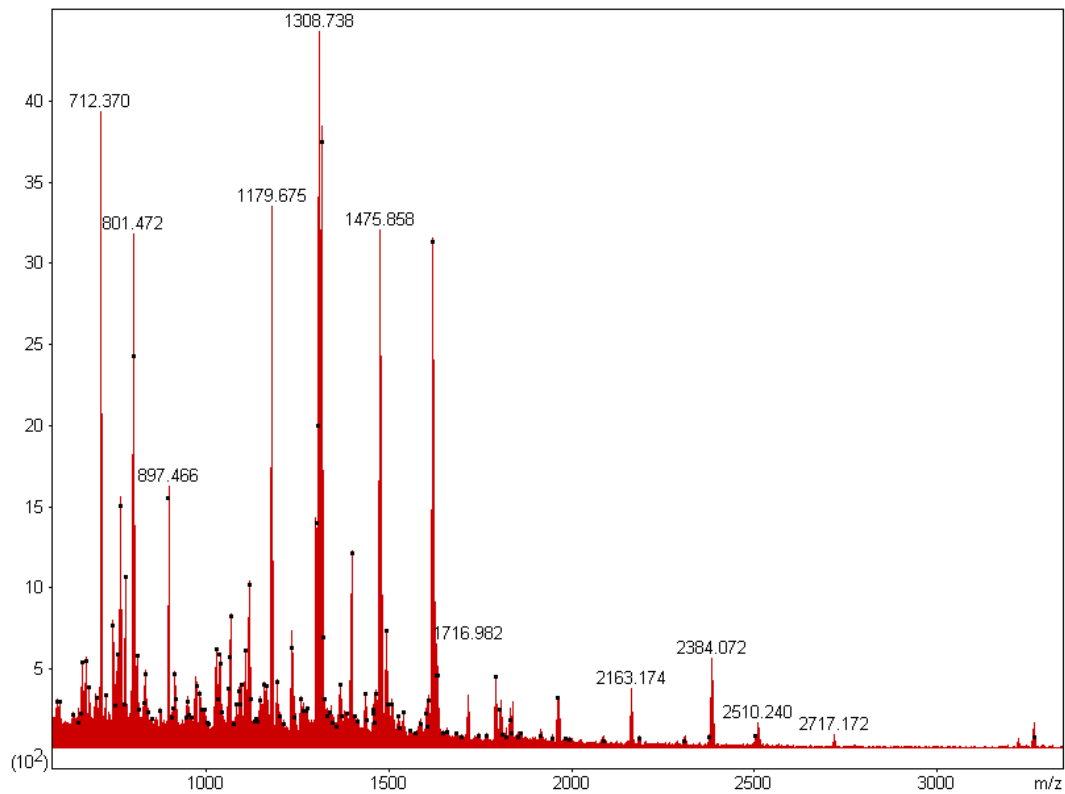

### Probability Based Mowse Score:

Protein score is  $-10 \cdot \log(P)$ , where P is the probability that the observed match is a random event. Protein scores greater than 72 are significant ( $p < 0.05$ ).

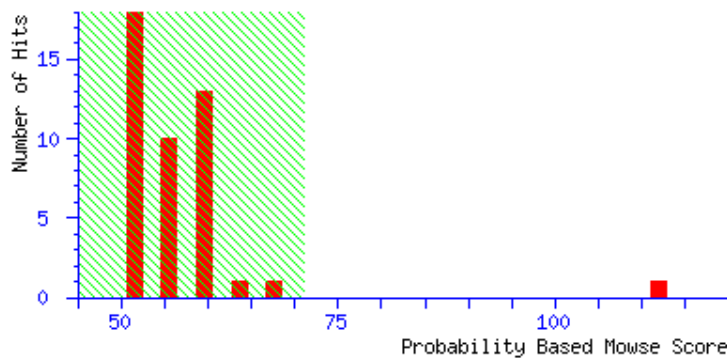

## Matched peptide sequences: shown in **Red**

1 MASHSSTLLS SPTFAPFSSH RLHYPNPST LRF**SRPIR**NK PNLALRCSVS  
 51 IEK**EV**PETER **PFTFLR**SDD **VTPSSSSSV** **RARFETMIRA** **AQDSV**CAIE  
 101 **AIEGGPK**FKE **DVWSRPGGGG** **GISRVLQDN** **VFEK**AGVNVSVVYGVMPPEA  
 151 YRAAKGSASD QKGPVPPFFA AGVSSVLHPK NPFAPTLHFN YRYFETDAPK  
 201 DVPGAPRQWW FGGGTDFTPA YIFEEDV**KHF** **HSIQKQACDK** **FDPSFYPR**FK  
 251 **KWCDDYFYIK** **HRDER**RGLGG IFFDDLNDYD QEMLLSFATE CANSVVPAYI  
 301 PIVEKR**KDME** **FTEQHKAWQQ** **LRRGRYVEFN** **LVYDR**GTTFG LKTGGRIESI  
 351 **LVS**LPLSARW EYDHKPEEGT EE**WKLLDACI** **NPKE**WI

## Matched peptides information:

| Start - End | Observed  | Mr(expt)  | Mr(calc)  | ppm | Miss Sequence                       |
|-------------|-----------|-----------|-----------|-----|-------------------------------------|
| 33 - 38     | 775.4127  | 774.4054  | 774.4500  | -58 | 0 R.FSRPIR.N                        |
| 54 - 66     | 1620.9589 | 1619.9516 | 1619.8308 | 75  | 0 K.EVPETERPFTFLR.D                 |
| 67 - 81     | 1525.8362 | 1524.8289 | 1524.6540 | 115 | 0 R.DSDDVTPSSSSSVR.A                |
| 82 - 89     | 1039.5751 | 1038.5678 | 1038.5280 | 38  | 1 R.RARFETMIR.A Oxidation (M)       |
| 84 - 89     | 812.4280  | 811.4207  | 811.3898  | 38  | 0 R.FETMIR.A Oxidation (M)          |
| 90 - 107    | 1830.9694 | 1829.9621 | 1829.8465 | 63  | 0 R.AAQDSVCAIEAIEGGPK.F             |
| 108 - 124   | 1805.0124 | 1804.0051 | 1803.9016 | 57  | 1 K.FKEDVWSRPGGGGISR.V              |
| 125 - 134   | 1148.6390 | 1147.6317 | 1147.5873 | 39  | 0 R.VLQDGNVFEK.A                    |
| 229 - 235   | 896.4969  | 895.4897  | 895.4664  | 26  | 0 K.HFSIQK.Q                        |
| 236 - 248   | 1630.8638 | 1629.8565 | 1629.7246 | 81  | 1 K.QACDKFDPSFYPR.F                 |
| 241 - 248   | 1028.5438 | 1027.5365 | 1027.4763 | 59  | 0 K.FDPSFYPR.F                      |
| 252 - 262   | 1602.9262 | 1601.9189 | 1601.7085 | 131 | 1 K.WCDDYFYIKHR.D                   |
| 261 - 265   | 712.3698  | 711.3625  | 711.3412  | 30  | 1 K.HRDER.R                         |
| 307 - 316   | 1308.7381 | 1307.7308 | 1307.5816 | 114 | 1 R.KDMEFTEQHK.A Oxidation (M)      |
| 308 - 322   | 1962.9883 | 1961.9810 | 1961.9054 | 39  | 1 K.DMEFTEQHKAWQQLR.R Oxidation (M) |
| 317 - 322   | 801.4715  | 800.4642  | 800.4293  | 44  | 0 K.AWQQLR.R                        |
| 326 - 335   | 1317.7425 | 1316.7352 | 1316.6401 | 72  | 0 R.YVEFNLVYDR.G                    |
| 347 - 359   | 1397.9308 | 1396.9235 | 1396.8289 | 68  | 0 R.IESILVSLPLSAR.W                 |
| 375 - 383   | 1043.5719 | 1042.5646 | 1042.5481 | 16  | 0 K.LLDACINPK.E                     |

Spot No.: **58**

Mascot score: **146**    Sequence coverage %: **23**

NCBI accession No.: **gi| 15223226**

Matched peptides No.: **15**

Total peptides No.: **27**

Calculated Mr: **63670**

Calculated pI: **5.56**

### Annotated PMF spectra:

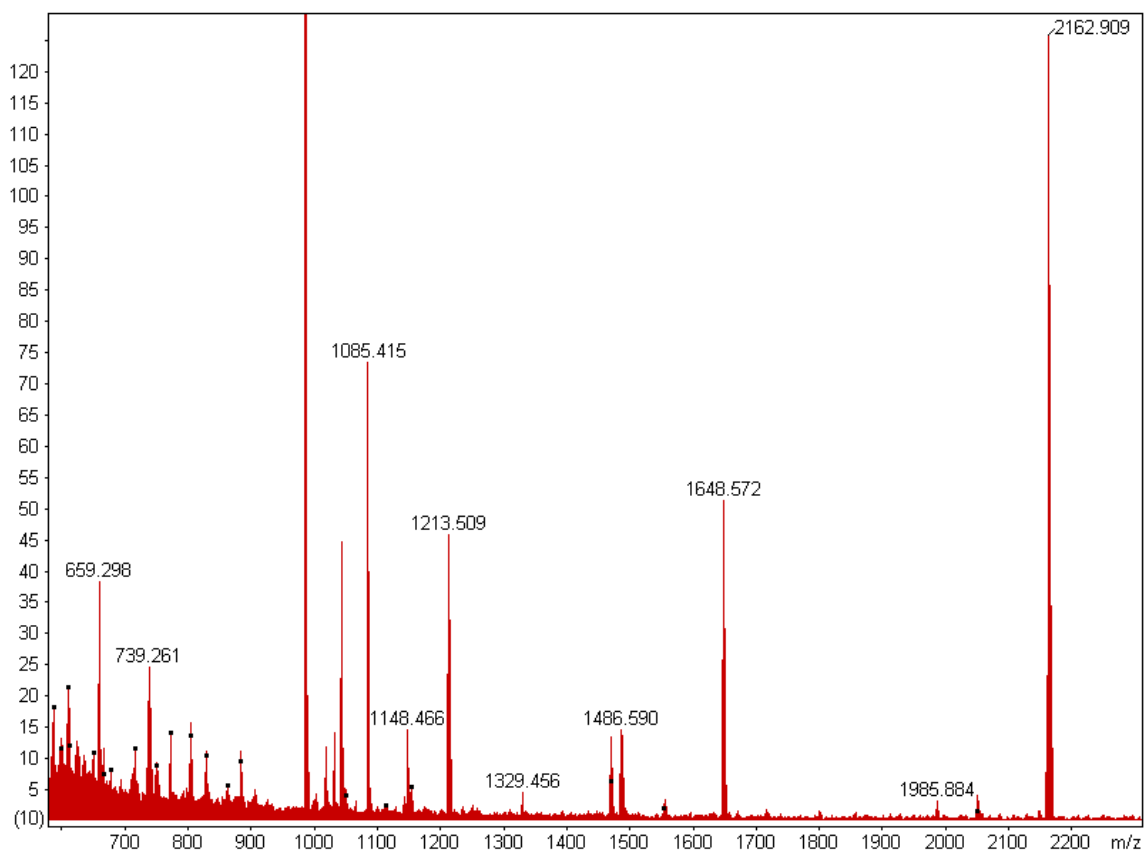

### Probability Based Mowse Score:

Protein score is  $-10 \cdot \log(P)$ , where P is the probability that the observed match is a random event.  
Protein scores greater than 72 are significant ( $p < 0.05$ ).

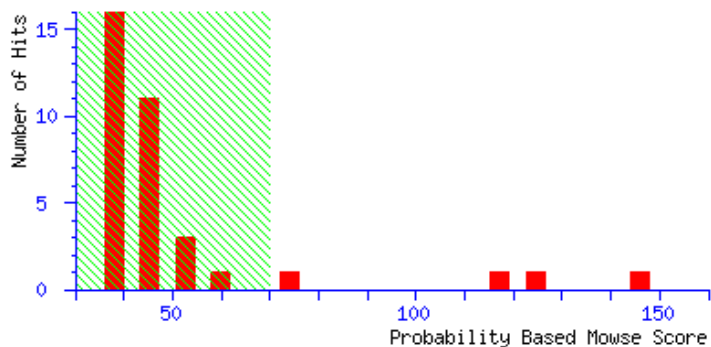

Matched peptide sequences: shown in **Bold Red**

```

1 MVSFKVSLVS TSPIDGQKPG TSGLRKKVKV FKQPNYLENF VQATFNALTT
51 EKVKGATLVV SGDGRYYSEQ AIQIIVKMAA ANGVRRVWVG QNSLLSTPAV
101 SAIIRERVGA DGSKATGAFI LTASHNPGGP TEDFGIKYNM ENGGPAPESI
151 TDKIYENTKT IKEYPIAEDL PRVDISTIGI TSFEGPEGKF DVEVFDSADD
201 YVKLMKSIFD FESIKKLLSY PKFTFCYDAL HGVAGAYAHR IFVEELGAPE
251 SLLNLCVPKE DFGGGHPDPN LTYAKELVAR MGLSKTDDAG GEPPEFGAAA
301 DGDADRNMIL GKRRFFVTPSD SVAIIAANAV GAIPYFSSGL KGVARSMPST
351 AALDVVAKNL GLKFFEVPPTG WKFFGNLMDA GMCSVCGEES FGTGSDHIRE
401 KDGIWAVLAW LSILAHKNKE TLDGNAKLVT VEDIVRQHWA TYGRHYYTRY
451 DYENVDATAA KELMGLLVKL QSSLPEVNKI IKGIHPEVAN VASADEFEYK
501 DPVDGSVSKH QGIRYLFEDG SRLVFRLSGT GSEGATIRLY IEQYEKDASK
551 IGRDSQDALG PLVDVALKLS KMQEFTGRSS PTVIT

```

Matched peptides information:

| Start - End | Observed  | Mr(expt)  | Mr(calc)  | ppm  | Miss | Sequence                   |
|-------------|-----------|-----------|-----------|------|------|----------------------------|
| 55 - 65     | 1031.4202 | 1030.4129 | 1030.5407 | -124 | 0    | K.GATLVVSGDGR.Y            |
| 78 - 85     | 805.3199  | 804.3127  | 804.3912  | -98  | 0    | K.MAAANGVR.R Oxidation (M) |
| 190 - 203   | 1648.5717 | 1647.5644 | 1647.7305 | -101 | 0    | K.FDVEVFDSADDYVK.L         |
| 207 - 216   | 1213.5092 | 1212.5019 | 1212.6390 | -113 | 1    | K.SIFDFESIKK.L             |
| 400 - 417   | 2049.7377 | 2048.7304 | 2049.1411 | -200 | 1    | R.EKDGIWAVLAWLSILAHK.N     |
| 428 - 436   | 1043.4989 | 1042.4916 | 1042.6023 | -106 | 0    | K.LVTVEDIVR.Q              |
| 437 - 444   | 1018.3739 | 1017.3666 | 1017.4781 | -110 | 0    | R.QHWATYGR.H               |
| 445 - 449   | 739.2609  | 738.2536  | 738.3449  | -124 | 0    | R.HYYTR.Y                  |
| 470 - 479   | 1114.4232 | 1113.4159 | 1113.6030 | -168 | 0    | K.LQSSLPEVNK.I             |
| 510 - 514   | 610.2531  | 609.2458  | 609.3347  | -146 | 0    | K.HQGIR.Y                  |
| 515 - 522   | 986.3524  | 985.3452  | 985.4505  | -107 | 0    | R.YLFEDGSR.L               |
| 527 - 538   | 1148.4660 | 1147.4587 | 1147.5833 | -109 | 0    | R.LSGTGSEGATIR.L           |
| 539 - 546   | 1085.4151 | 1084.4078 | 1084.5440 | -126 | 0    | R.LYIEQYEK.D               |
| 539 - 550   | 1486.5899 | 1485.5826 | 1485.7351 | -103 | 1    | R.LYIEQYEKDASK.I           |
| 572 - 578   | 884.2879  | 883.2806  | 883.3858  | -119 | 0    | K.MQEFTGR.S Oxidation (M)  |

Spot No.: **59**

Mascot score: **124**    Sequence coverage %: **31**

NCBI accession No.: **gi| 15223226**

Matched peptides No.: **16**

Total peptides No.: **52**

Calculated Mr: **63670**

Calculated pI: **5.56**

### Annotated PMF spectra:

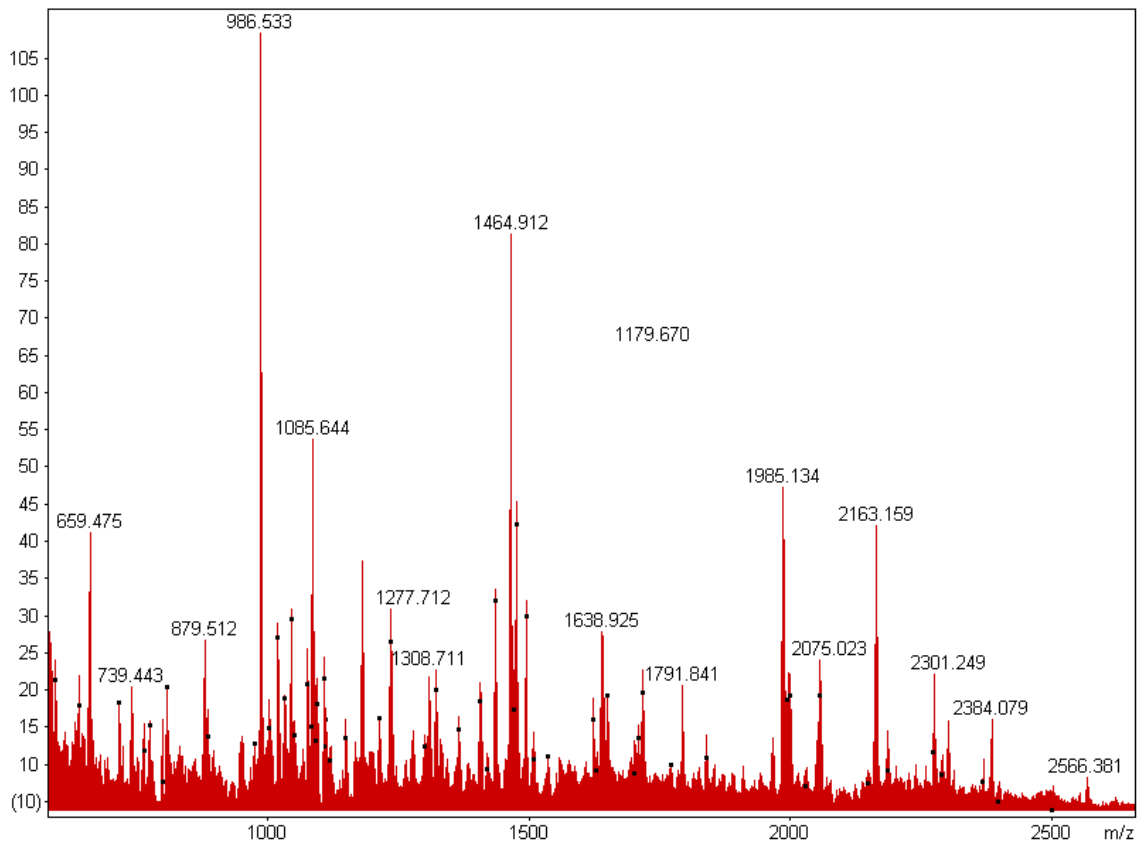

### Probability Based Mowse Score:

Protein score is  $-10 \cdot \log(P)$ , where P is the probability that the observed match is a random event. Protein scores greater than 72 are significant ( $p < 0.05$ ).

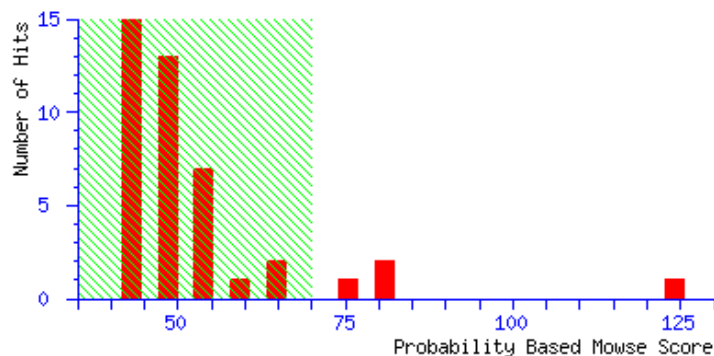

## Matched peptide sequences: shown in **Bold Red**

```

1 MVSFKVSLVS TSPIDGQKPG TSLRKKVKV FKQPNYLENF VQATFNALTT
51 EKVKGATLVV SGDGRYYSEQ AIQIIVKMAA ANGVRRVWVG QNSLLSTPAV
101 SAIIRERVGA DGSKATGAFI LTASHNPGGP TEDFGIKYNM ENGGPAPESI
151 TDKIYENTKT IKEYPIAEDL PRVDISTIGI TSFEGPEGKF DVEVFDSADD
201 YVKLMKSIFD FESIKKLLSY PKFTFCYDAL HGVAGAYAHR IFVEELGAPE
251 SLLNCVPKE DFGGGHPDPN LTYAKELVAR MGLSKTDDAG GEPPEFGAAA
301 DGDADRNMIL GKRFFVTPSD SVAIIAANAV GAIPYFSSGL KGVARSMPST
351 AALDVVAKNL GLKFFEVPTG WKFFGNLMDA GMCSVCGEES FGTGSDHIRE
401 KDWIWAFLAW LSILAHKNKE TLDGNAKLVT VEDIVRQHWA TYGRHYTRY
451 DYENVDATAA KELMGLLVKL QSSLPEVNKI IKGIHPEVAN VASADEFEYK
501 DPVDGVSVKH QGIRYLFEDG SRLVFRLSGT GSEGATIRLY IEQYEKDASK
551 IGRDSQDALG PLVDVALKLS KMQEFTGRSS PTVIT

```

## Matched peptides information:

| Start - End | Observed  | Mr(expt)  | Mr(calc)  | ppm | Miss Sequence                                  |
|-------------|-----------|-----------|-----------|-----|------------------------------------------------|
| 55 - 65     | 1031.6030 | 1030.5957 | 1030.5407 | 53  | 0 K.GATLVVSGDGR.Y                              |
| 78 - 85     | 805.5024  | 804.4951  | 804.3912  | 129 | 0 K.MAAANGVR.R Oxidation (M)                   |
| 115 - 137   | 2301.2487 | 2300.2414 | 2300.1437 | 42  | 0 K.ATGAFILTASHNPGGPTEDFGIK.Y                  |
| 190 - 203   | 1648.8205 | 1647.8132 | 1647.7305 | 50  | 0 K.FDVEVFDSADDYVK.L                           |
| 207 - 215   | 1085.6438 | 1084.6365 | 1084.5441 | 85  | 0 K.SIFDFESIK.K                                |
| 207 - 216   | 1213.6912 | 1212.6839 | 1212.6390 | 37  | 1 K.SIFDFESIKK.L                               |
| 223 - 240   | 2056.0269 | 2055.0196 | 2054.9421 | 38  | 0 K.FTFCYDALHGVAGAYAHR.I                       |
| 281 - 306   | 2566.3811 | 2565.3738 | 2565.0925 | 110 | 1 R.MGLSKTDDAGGEPPEFGAAADGDADR.N Oxidation (M) |
| 364 - 372   | 1110.6272 | 1109.6199 | 1109.5546 | 59  | 0 K.FFEVPTGWK.F                                |
| 428 - 436   | 1043.6788 | 1042.6715 | 1042.6023 | 66  | 0 K.LVTVEDIVR.Q                                |
| 437 - 444   | 1018.5670 | 1017.5597 | 1017.4781 | 80  | 0 R.QHWATYGR.H                                 |
| 445 - 449   | 739.4432  | 738.4359  | 738.3449  | 123 | 0 R.HYYTR.Y                                    |
| 462 - 479   | 1998.1084 | 1997.1011 | 1997.1231 | -11 | 1 K.ELMGLLVKLQSSLPEVNK.I                       |
| 515 - 522   | 986.5326  | 985.5254  | 985.4505  | 76  | 0 R.YLFEDGSR.L                                 |
| 527 - 538   | 1148.6588 | 1147.6515 | 1147.5833 | 59  | 0 R.LSGTGSEGATIR.L                             |
| 572 - 578   | 884.4948  | 883.4876  | 883.3858  | 115 | 0 K.MQEFTGR.S Oxidation (M)                    |

Spot No.: **60**

Mascot score: **93**    Sequence coverage %: **24**

NCBI accession No.: **gi| 22328910**

Matched peptides No.: **14**

Total peptides No.: **57**

Calculated Mr: **54154**

Calculated pI: **6.25**

### Annotated PMF spectra:

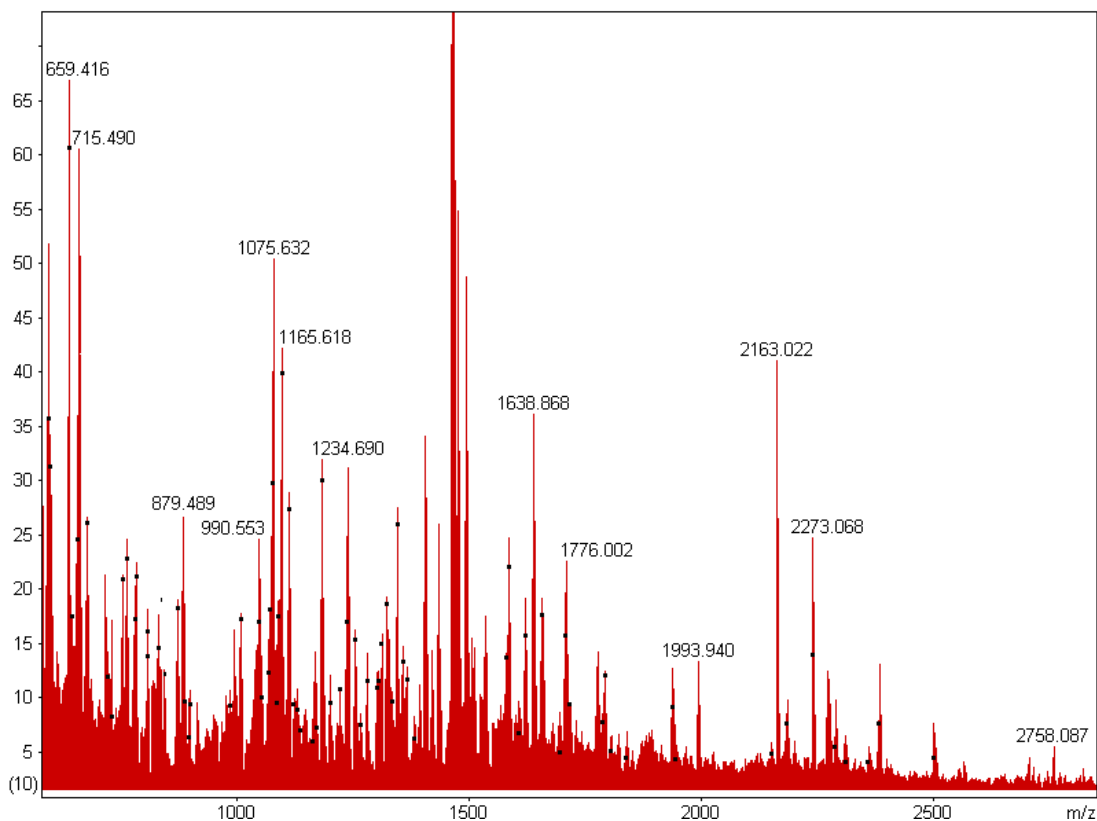

### Probability Based Mowse Score:

Protein score is  $-10 \cdot \log(P)$ , where P is the probability that the observed match is a random event. Protein scores greater than 72 are significant ( $p < 0.05$ ).

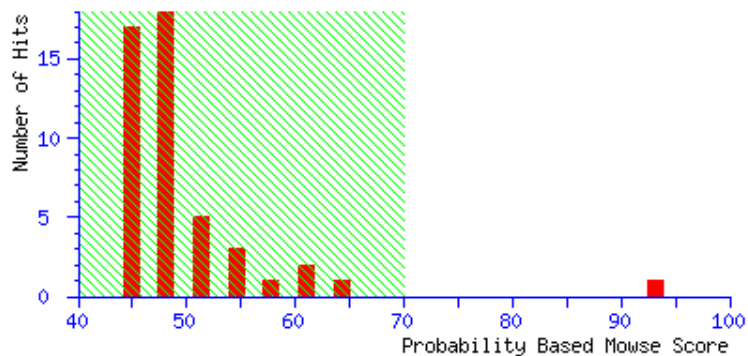



## Matched peptide sequences: shown in **Bold Red**

**1** MAEISATSFP SSSSSALVIR **SSHNGSLK**CQ NVAVPKTTSQ FOELSLK**RSQ**  
**51** **LVGN**AVVT**GH** **VTGSR**SCKNQ AIRAVLSGDG TALTTDSKEA GLRGK**LKKV**V  
**101** LAYSGGLDTS VIVPWLKENY GCEVVCFTAD VGQGIKELEG LEQKAKASGA  
**151** SQLVVKDLTE EFVKDFIFPC LR**AGAIYERK** **YLLGTSMARP** **VI**AKAMVDVA  
**201** AEVGADAVAH GCTGKGNDQV **RFELTFFSLN** **PEL**KVVAPWR EWEIQ**GREDA**  
**251** **IEYAKKHNP** **VPVTKSIYS** RDRNLWHL**SH** EGD**LLED**PAN EPKKDMY**MMS**  
**301** VDPEDAPDQP EYIEIGIESG LPVALNGKAL SPATLLAELN TIGGKHGIGR  
**351** IDMVENRLVG MKSRGVYETP GGTILFAAVQ ELES**LTLDRE** **SIQV**KD**TLAL**  
**401** **KYAEMVYAGR** WFDPLRESMD AFMEKITETT TGSVTLKLYK **GSVSVTGR**QS  
**451** **PNSLYR**QDIS SFEGSEIYNQ ADAAGFIRLY GLPMKIRAML KKIS

## Matched peptides information:

| Start - End | Observed  | Mr(expt)  | Mr(calc)  | ppm | Miss | Sequence                                   |
|-------------|-----------|-----------|-----------|-----|------|--------------------------------------------|
| 21 - 28     | 829.3871  | 828.3798  | 828.4090  | -35 | 0    | R.SSHNGSLK.C                               |
| 48 - 65     | 1837.9523 | 1836.9450 | 1836.9919 | -25 | 1    | K.RSQLVGNNAVVTGHVTGSR.S                    |
| 173 - 179   | 779.4507  | 778.4434  | 778.3973  | 59  | 0    | R.AGAIYER.K                                |
| 181 - 194   | 1535.8073 | 1534.8000 | 1534.8541 | -35 | 0    | K.YLLGTSMARPVI <b>A</b> .A Oxidation (M)   |
| 222 - 234   | 1584.7888 | 1583.7815 | 1583.8235 | -27 | 0    | R.FELTFFSLN <b>PEL</b> .V                  |
| 248 - 256   | 1066.6319 | 1065.6246 | 1065.5342 | 85  | 1    | R.ED <b>ATEYAKK</b> .H                     |
| 257 - 265   | 990.5527  | 989.5455  | 989.5658  | -21 | 0    | K.HN <b>V</b> PPV <b>TK</b> .K             |
| 257 - 266   | 1118.5826 | 1117.5753 | 1117.6608 | -76 | 1    | K.HN <b>V</b> PPV <b>TKK</b> .S            |
| 266 - 271   | 753.4338  | 752.4265  | 752.4181  | 11  | 1    | K.KSIY <b>S</b> .D                         |
| 390 - 401   | 1344.7283 | 1343.7210 | 1343.7660 | -33 | 1    | R.ESI <b>QV</b> KD <b>TLALK</b> .Y         |
| 396 - 410   | 1716.8687 | 1715.8614 | 1715.8552 | 4   | 1    | K.D <b>TLALKYAEMVYAGR</b> .W Oxidation (M) |
| 402 - 410   | 1075.6324 | 1074.6251 | 1074.4804 | 135 | 0    | K.Y <b>AEMVYAGR</b> .W Oxidation (M)       |
| 441 - 448   | 762.4502  | 761.4430  | 761.4032  | 52  | 0    | K.G <b>SVSVTGR</b> .Q                      |
| 441 - 456   | 1707.7906 | 1706.7833 | 1706.8700 | -51 | 1    | K.G <b>SVSVTGRQSPNSLYR</b> .Q              |

Spot No.: **61**

Mascot score: **112** Sequence coverage %: **24**

NCBI accession No.: **gi| 15242093**

Matched peptides No.: **13**

Total peptides No.: **31**

Calculated Mr: **57763**

Calculated pI: **5.59**

### Annotated PMF spectra:

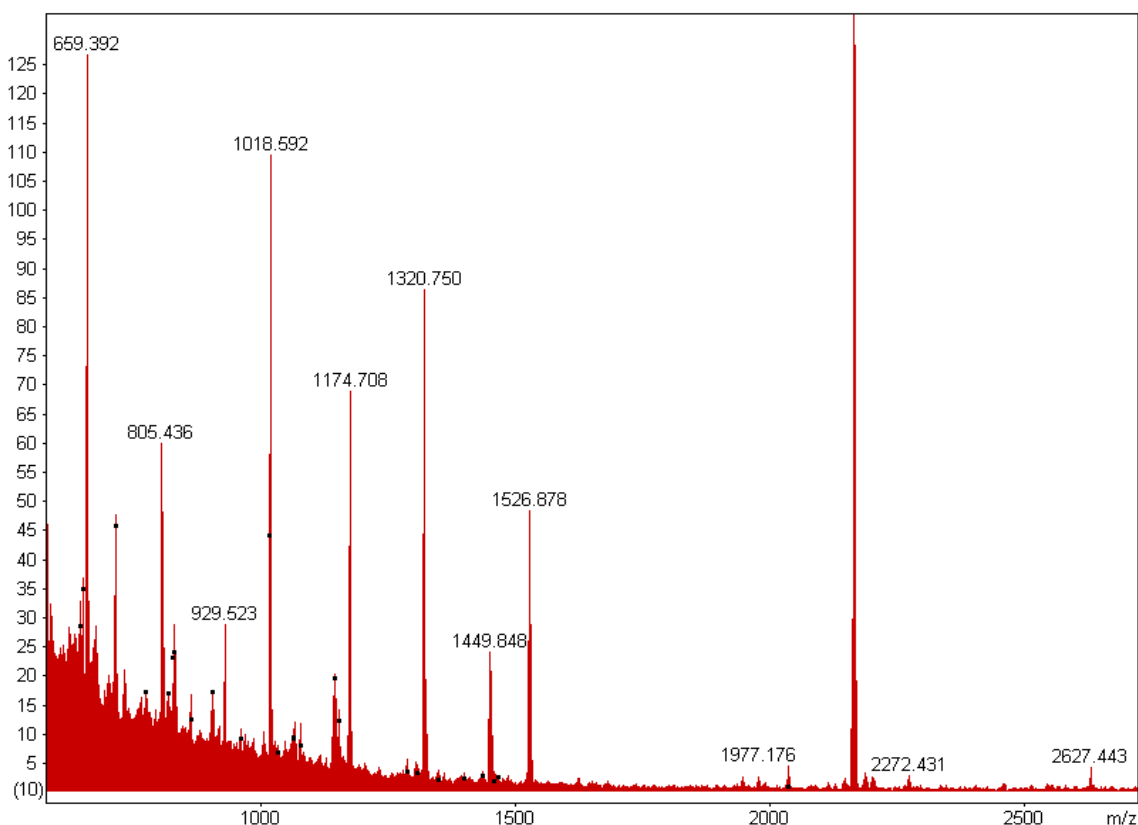

### Probability Based Mowse Score:

Protein score is  $-10 \cdot \log(P)$ , where P is the probability that the observed match is a random event. Protein scores greater than 72 are significant ( $p < 0.05$ ).

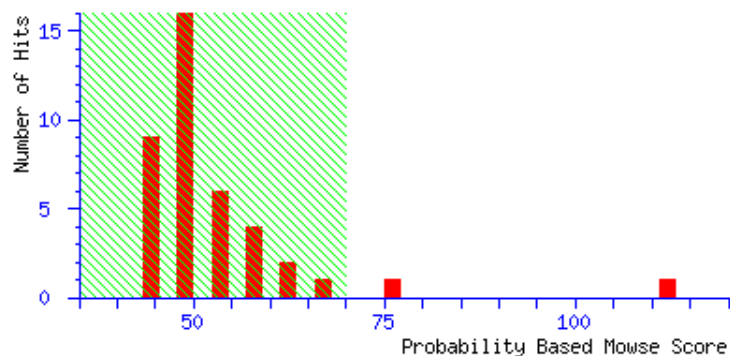

Matched peptide sequences: shown in **Bold Red**

1 MPIDKIFKDD ASEEKGERAR MASFVGAMAI SDLVKSTLGP KGMDK**ILQST**  
 51 **GRGHAVTVTN** DGATILK**SLH** **IDNPAAKVLV** DISK**VQDDEV** **GDGTTSVVVL**  
 101 **AGELLREAEK** LVASKI**HPMT** **IIAGYRMASE** CARN**ALLKRV** IDNKD**NAEKF**  
 151 RSDLLKI**AMT** TLC**SKILSQD** KEHFAEMAVD AVFRLKGSTN LEAIQ**IIKKP**  
 201 GGSLK**DSFLD** **EGFILDKKIG** IGQPKRIENA NILVANTAMD TDKVKI**YGAR**  
 251 VRVDSMTKVA EIEGA**EKEKM** KDKVKKI**IGH** GINCFVNRQL IYN**FPEELFA**  
 301 DAGILAI**EHA** DFEGIER**LGL** **VTGGEI**ASTF**** **DN**PESV**KLGH** CK**LIEEIMIG**  
 351 **EDKLIHFSGC** EMGQACSIVL **RGASHHVLDE** **AERSLHDALC** VLSQ**TVMNDR**  
 401 VLLGGG**WP**EM VMAKEVDELA RKTAG**KKSHA** **IEAFSRALVA** IPTTIAD**NAG**  
 451 LDSAELVAQL RAEH**HTEGCN** AGIDVITGAV GDMEER**GIYE** **AFKVKQAVLL**  
 501 SATEASEMIL RVDEIITCAP RRRED**RM**

Matched peptides information:

| Start - End | Observed  | Mr(expt)  | Mr(calc)  | ppm | Miss | Sequence                                          |
|-------------|-----------|-----------|-----------|-----|------|---------------------------------------------------|
| 46 - 52     | 774.4096  | 773.4023  | 773.4395  | -48 | 0    | K.I <b>LQSTGR</b> .G                              |
| 68 - 77     | 1065.5784 | 1064.5711 | 1064.5614 | 9   | 0    | K.SLHID <b>NPAAK</b> .V                           |
| 85 - 106    | 2272.4307 | 2271.4234 | 2271.1595 | 116 | 0    | K.VQDDEVGDGTT <b>SVVVL</b> AGELLR.E               |
| 116 - 126   | 1287.8006 | 1286.7933 | 1286.6805 | 88  | 0    | K.I <b>HPMT</b> IIAGYR.M Oxidation (M)            |
| 134 - 139   | 714.4092  | 713.4020  | 713.4548  | -74 | 1    | R.N <b>ALLKR</b> .V                               |
| 206 - 217   | 1398.7478 | 1397.7405 | 1397.6715 | 49  | 0    | K.D <b>SFLDEGF</b> ILDK.K                         |
| 206 - 218   | 1526.8776 | 1525.8703 | 1525.7664 | 68  | 1    | K.D <b>SFLDEGF</b> ILDKK.I                        |
| 318 - 337   | 2034.2125 | 2033.2052 | 2033.0317 | 85  | 0    | R.LGLV <b>TGGEI<b>ASTF</b></b> DN <b>PESV</b> K.L |
| 343 - 353   | 1305.7513 | 1304.7440 | 1304.6533 | 70  | 0    | K.LIEE <b>DMIGEDK</b> .L Oxidation (M)            |
| 372 - 383   | 1320.7496 | 1319.7423 | 1319.6218 | 91  | 0    | R.GASHH <b>VLDEAER</b> .S                         |
| 427 - 436   | 1145.6951 | 1144.6878 | 1144.5989 | 78  | 1    | K.K <b>SHAIEAFSR</b> .A                           |
| 428 - 436   | 1017.5753 | 1016.5680 | 1016.5039 | 63  | 0    | K.S <b>HAI</b> EAFSR.A                            |
| 487 - 493   | 827.4165  | 826.4092  | 826.4225  | -16 | 0    | R.GI <b>YEAFK</b> .V                              |

Spot No.: **62**

Mascot score: **145**    Sequence coverage %: **31**

NCBI accession No.: **gi| 18391066**

Matched peptides No.: **18**

Total peptides No.: **47**

Calculated Mr: **60770**

Calculated pI: **5.32**

### Annotated PMF spectra:

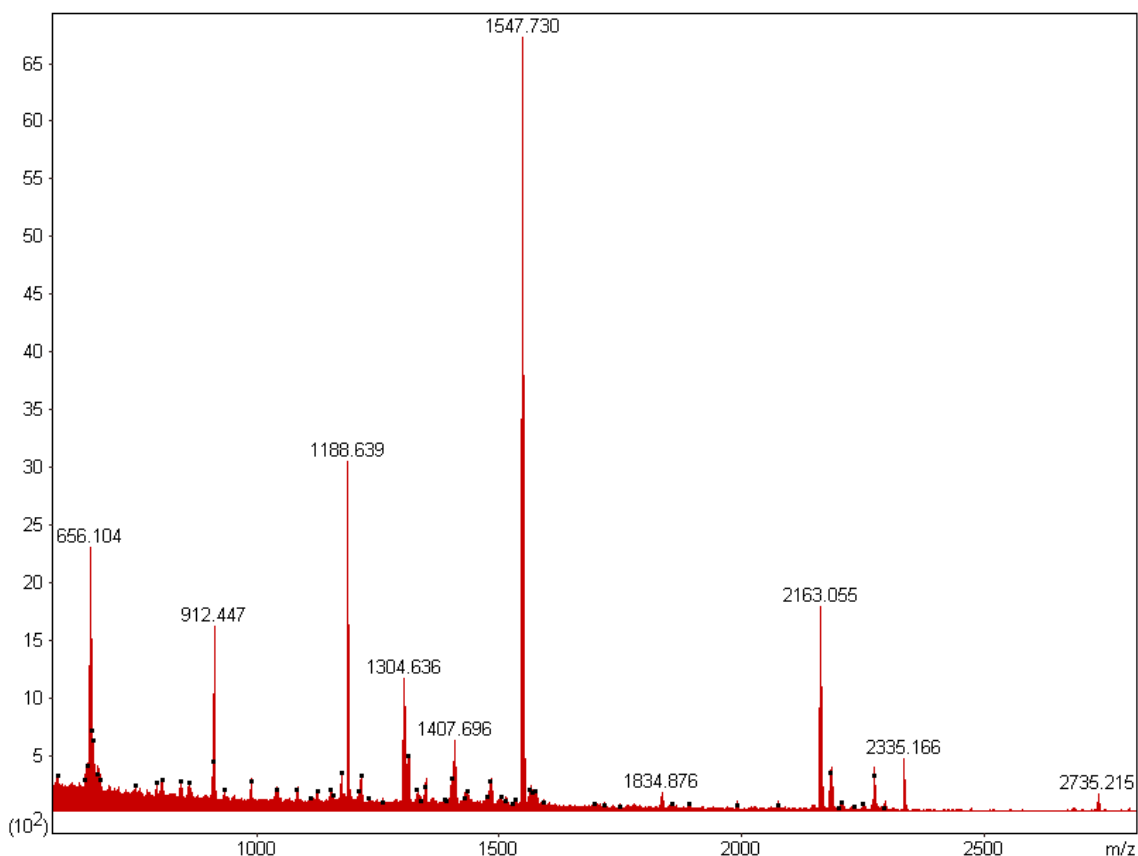

### Probability Based Mowse Score:

Protein score is  $-10 \cdot \log(P)$ , where P is the probability that the observed match is a random event. Protein scores greater than 72 are significant ( $p < 0.05$ ).

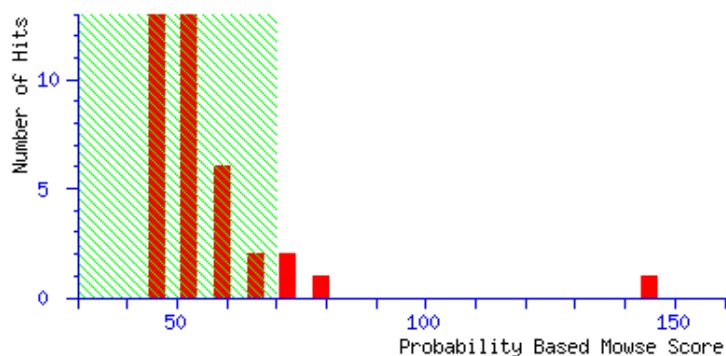

## Matched peptide sequences: shown in **Bold Red**

**1 MATSSAWKLD** DHPKLPKGKT IAVIVLDGWG ESAPDQYNCI HNAPTPAMDS  
**51 LKHGAPDWT** LIKA**HGTA**V**G LPSEDDMGNS** **EVGH**NAL**GAG RIFAQ**GAKLC  
**101 DQALASGKIF** EGE**GFKYVSE** SFETNTLHLV GLLSDGGVHS **RLDQLQLLIK**  
**151 GSAERGA**KRI **RVHIL**T**DGRD** VLDGSSVGFV ETLEADLVAL RENGVD**AQIA**  
**201 SGGGR****MYVT**L **DRY**END**WEV**V **KRGW**DA**QVLG** **EAP**HKFKNAV EAVKTLRKEP  
**251 GANDQYLPPF** VIVDES**GKAV** GPIVDG**DAVV** TFNFRADRMV MHAK**ALEY**ED  
**301 FDKFDR**VRY**P KIRY**AG**MLQY** **DGEL**KLPSRY **LVS**PEIDRT SGEY**LTH**NGV  
**351 STFAC**SE**TVK** FGHV**TFFW**NG NRS**GYF**NEKL **EEY**VEIPSDS **GIS**FN**VQPK**M  
**401 KALEI**GE**KAR** **DAIL**SG**KFDQ** **VRV**NIPNGDM VGHTGDIEAT VVACE**AA**D**LA**  
**451 VKMIF**DAIEQ **VKGI**Y**VVTAD** **HGNA**ED**MV**KR DKSGK**PAL**DK EGKLQIL**TSH**  
**501 TLK**PVPIAIG **GPGL**AQ**G**VRF **RKD**LETP**GLA** NVAATVMNLH **GFV**APSD**YEP**  
**551 TLIE**VVE

## Matched peptides information:

| Start - End | Observed  | Mr(expt)  | Mr(calc)  | ppm | Miss | Sequence                                                        |
|-------------|-----------|-----------|-----------|-----|------|-----------------------------------------------------------------|
| 2 - 8       | 750.3794  | 749.3721  | 749.3708  | 2   | 0    | M.ATSSAWK.L                                                     |
| 64 - 91     | 2735.2152 | 2734.2079 | 2734.2365 | -10 | 0    | K.AHGTA <b>VGLPSEDDMGNS</b> EVGH <b>NALGAG</b> .I Oxidation (M) |
| 142 - 150   | 1083.6350 | 1082.6277 | 1082.6699 | -39 | 0    | R.LDQLQLLIK.G                                                   |
| 162 - 169   | 910.4892  | 909.4820  | 909.5032  | -23 | 0    | R.VHILTDGR.D                                                    |
| 206 - 221   | 2075.9609 | 2074.9536 | 2074.9670 | -6  | 1    | R.MYVTLDRYENDWEVVK.R Oxidation (M)                              |
| 213 - 222   | 1337.6451 | 1336.6378 | 1336.6411 | -2  | 1    | R.YENDWEVVKR.G                                                  |
| 222 - 235   | 1563.7875 | 1562.7802 | 1562.7954 | -10 | 1    | K.RGWDAQVLGEAPHK.F                                              |
| 223 - 235   | 1407.6957 | 1406.6884 | 1406.6943 | -4  | 0    | R.GWDAQVLGEAPHK.F                                               |
| 295 - 306   | 1547.7303 | 1546.7230 | 1546.6940 | 19  | 1    | K.ALEYEDFKFDR.V                                                 |
| 314 - 325   | 1387.6445 | 1386.6372 | 1386.6489 | -8  | 0    | R.YAGMLQYDGELK.L                                                |
| 314 - 325   | 1403.6412 | 1402.6339 | 1402.6438 | -7  | 0    | R.YAGMLQYDGELK.L Oxidation (M)                                  |
| 330 - 339   | 1188.6391 | 1187.6318 | 1187.6186 | 11  | 0    | R.YLVSPEIDR.T                                                   |
| 373 - 379   | 844.3492  | 843.3420  | 843.3763  | -41 | 0    | R.SGYFNEK.L                                                     |
| 380 - 399   | 2251.0688 | 2250.0615 | 2250.1056 | -20 | 0    | K.LEEYVEIPSDSGISFN <b>VQPK</b> .M                               |
| 411 - 422   | 1348.7089 | 1347.7016 | 1347.7147 | -10 | 1    | R.DAILSGK <b>FDQVR</b> .V                                       |
| 418 - 422   | 664.3384  | 663.3312  | 663.3340  | -4  | 0    | K.FDQVR.V                                                       |
| 463 - 479   | 1834.8760 | 1833.8687 | 1833.8567 | 7   | 0    | K.GIYVVTAD <b>HGNAEDMVK</b> .R Oxidation (M)                    |
| 463 - 480   | 1990.9394 | 1989.9321 | 1989.9578 | -13 | 1    | K.GIYVVTAD <b>HGNAEDMVK</b> .D Oxidation (M)                    |

Spot No.: **63**

Mascot score: **87**    Sequence coverage %: **49**

NCBI accession No.: **gi| 30690323**

Matched peptides No.: **19**

Total peptides No.: **169**

Calculated Mr: **39646**

Calculated pI: **9.44**

### Annotated PMF spectra:

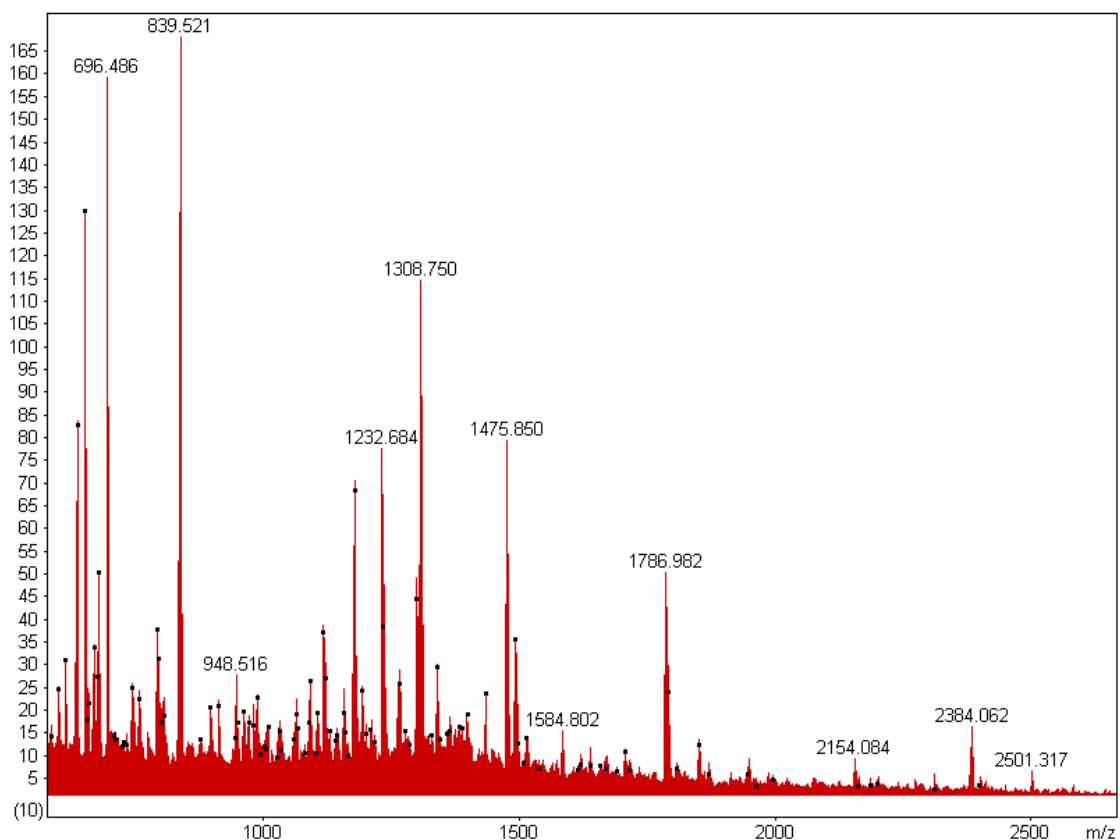

### Probability Based Mowse Score:

Protein score is  $-10 \cdot \log(P)$ , where P is the probability that the observed match is a random event. Protein scores greater than 72 are significant ( $p < 0.05$ ).

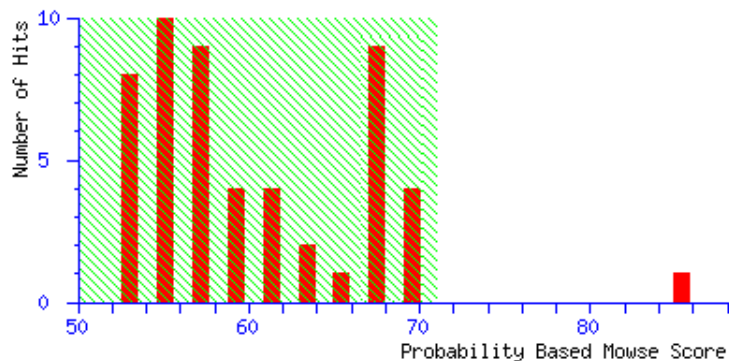

## Matched peptide sequences: shown in **Bold Red**

**1** MVEEAQLDPK **SKSIPNENLK** FGERALSAGG AAFISAVIVN PLDVVVKTRL**Q**  
**51** **AQAAGVPYQG** **SCR**LGCFTN **STLVHDLRSN** **SAPGMC**RITG SASVCSDNQY  
**101** KGTLDVIFYKI **IRQEGFSRLW** RGTNASLTLA IPTVGIYMPG YDYFRNIMEE  
**151** **FTTEKSPSLT** **VYVPLVAGTI** **ARSLACISCY** **PVELARTRMQ** **AFKGTQRNVK**  
**201** LPGVWKTLDV VVNPVK**GSNN** **GYRMLWTGLG** **AQLARDVPFS** **AICWSILEPT**  
**251** **RRSIQSAMGE** EPRAGSIIGA NFAAGFVAGA VAAAATCPLD VAKTRR**QIEK**  
**301** **NTDRAMTMTT** **RQTLAEIWRD** **GGMRGMFSGA** **GARVGR**AGPS VAIIVVSFYEV  
**351** VKYGLHNFHQ **Q**

## Matched peptides information:

| Start - End | Observed  | Mr(expt)  | Mr(calc)  | ppm | Miss | Sequence                       |
|-------------|-----------|-----------|-----------|-----|------|--------------------------------|
| 13 - 20     | 914.5674  | 913.5601  | 913.4869  | 80  | 0    | K.SIPNENLK.F                   |
| 49 - 63     | 1605.8422 | 1604.8349 | 1604.7729 | 39  | 0    | R.LQAQAAGVPYQGSCL.L            |
| 79 - 87     | 995.5140  | 994.5068  | 994.3960  | 111 | 0    | R.SNSAPGMCRI.I Oxidation (M)   |
| 110 - 118   | 1105.6110 | 1104.6037 | 1104.6040 | -0  | 1    | K.IIRQEGFSR.L                  |
| 146 - 155   | 1241.6179 | 1240.6106 | 1240.5645 | 37  | 0    | R.NIMEEFTTEK.S                 |
| 156 - 172   | 1743.8455 | 1742.8382 | 1742.9931 | -89 | 0    | K.SPSLTVYVPLVAGTIAR.S          |
| 173 - 186   | 1638.9328 | 1637.9255 | 1637.7905 | 82  | 0    | R.SLACISCYPVELAR.T             |
| 187 - 193   | 897.4624  | 896.4551  | 896.4538  | 1   | 1    | R.TRMQAFK.G Oxidation (M)      |
| 189 - 197   | 1082.6132 | 1081.6059 | 1081.5339 | 67  | 1    | R.MQAFKGTQR.N Oxidation (M)    |
| 194 - 200   | 802.4749  | 801.4676  | 801.4457  | 27  | 1    | K.GTQRNVK.L                    |
| 217 - 223   | 767.4085  | 766.4012  | 766.3358  | 85  | 0    | K.GSNNGYR.M                    |
| 224 - 235   | 1316.6343 | 1315.6270 | 1315.7071 | -61 | 0    | R.MLWTGLGAQLAR.D               |
| 236 - 251   | 1891.0119 | 1890.0046 | 1889.9346 | 37  | 0    | R.DVPFSAICWSILEPTR.R           |
| 297 - 304   | 1003.5488 | 1002.5415 | 1002.5094 | 32  | 1    | R.QIEKNTDR.A                   |
| 301 - 311   | 1329.6886 | 1328.6813 | 1328.5813 | 75  | 1    | K.NDRAMTMTTR.Q 2 Oxidation (M) |
| 312 - 319   | 1016.5601 | 1015.5528 | 1015.5451 | 8   | 0    | R.QTLAEIWR.D                   |
| 320 - 333   | 1369.6993 | 1368.6920 | 1368.6027 | 65  | 1    | R.DGMRGMFSGAGAR.V              |
| 325 - 336   | 1165.6081 | 1164.6008 | 1164.5822 | 16  | 1    | R.GMFSGAGARVGR.A               |
| 353 - 361   | 1143.5871 | 1142.5798 | 1142.5257 | 47  | 0    | K.YGLHNFHQ.-                   |

Spot No.: **64**

Mascot score: **108**    Sequence coverage %: **32**

NCBI accession No.: **gi| 15228194**

Matched peptides No.: **16**

Total peptides No.: **87**

Calculated Mr: **42787**

Calculated pI: **6.17**

### Annotated PMF spectra:

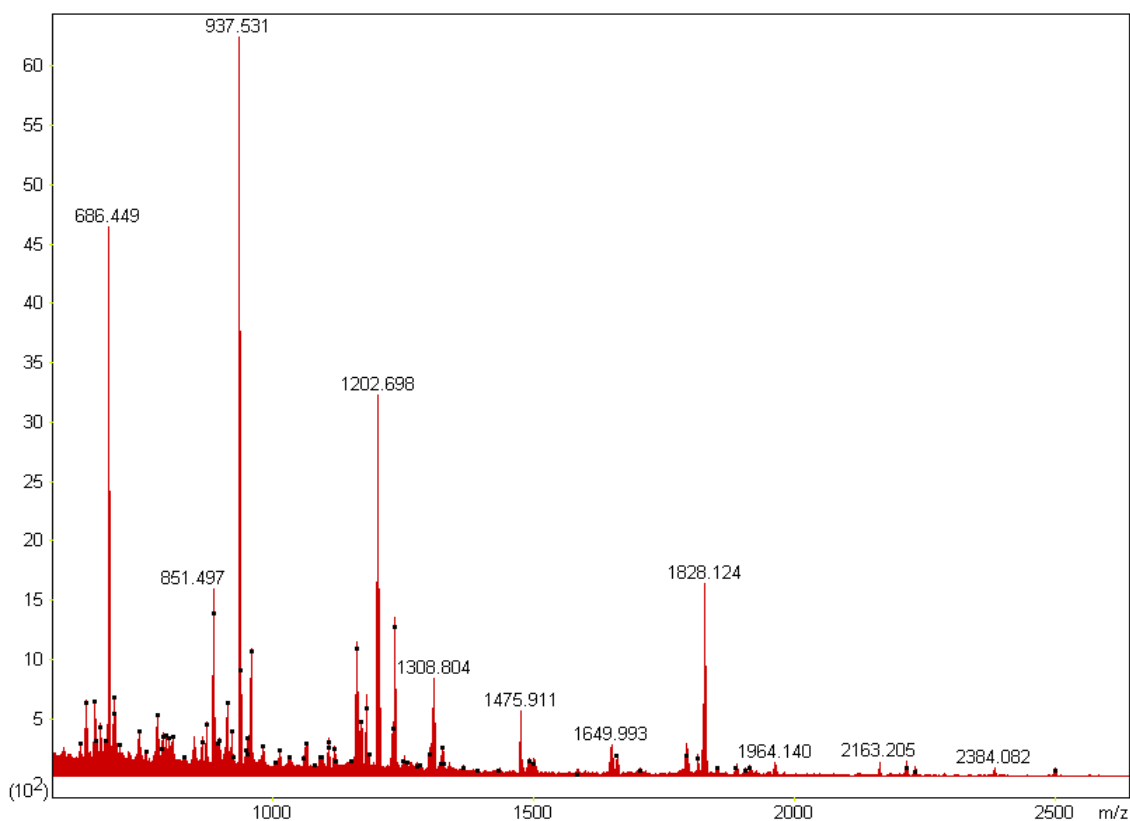

### Probability Based Mowse Score:

Protein score is  $-10 \cdot \log(P)$ , where P is the probability that the observed match is a random event. Protein scores greater than 72 are significant ( $p < 0.05$ ).

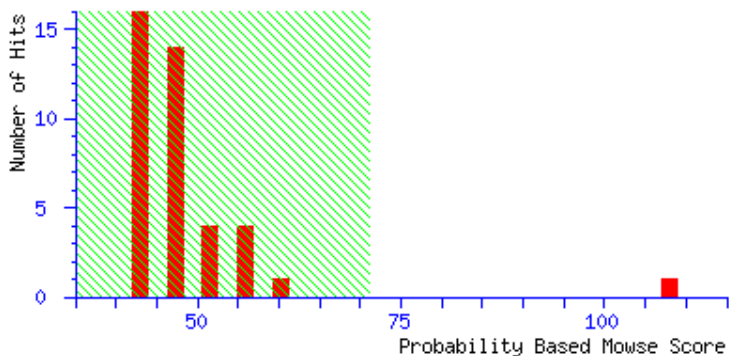



## Matched peptide sequences: shown in **Bold Red**

**1** METSIACYSR GILPPSVSSQ RSSTLVSPPS YSTSSSFKRL KSSSIFGDSL  
**51** RLAPKSQLKA TKAKSNGAST VTKCEIGQSL EEFLAQATPD KGLRTLMMCM  
**101** GEALRTIAFK VRTASCGGTA CVNSFGDEQL AVDMLADKLL FEALQYSHVC  
**151** KYACSEEVPE LQDMGGPVEG GFSVAFDPLD GSSIVDTNFT VGTIFGVWPG  
**201** **DKLTGITGGD QVAAAMGIYG PRTTYVLAVK GFPGTHEFL LDEGKWHVK**  
**251** **ETTEIAEGKM FSPGNLRATF DNSEYSKLID YYVKEYTLR YTGGMVDPVN**  
**301** **QIIVKEKGI F TSVTSPATA KLRLLEFVAP LGLLIENAGG FSSDGHKSVL**  
**351** **DKTIINLDDR TQVAYGSKNE IIRFEETLYG TSRLKNVPIG VTA**

## Matched peptides information:

| Start - End | Observed  | Mr(expt)  | Mr(calc)  | ppm | Miss | Sequence                |               |
|-------------|-----------|-----------|-----------|-----|------|-------------------------|---------------|
| 203 - 222   | 1964.1404 | 1963.1331 | 1962.9833 | 76  | 0    | K.LTGITGGDQVAAAMGIYGR.T | Oxidation (M) |
| 223 - 230   | 894.5613  | 893.5540  | 893.5222  | 36  | 0    | R.TTYVLAVK.G            |               |
| 231 - 245   | 1659.9916 | 1658.9843 | 1658.8304 | 93  | 0    | K.GFPGTHEFLLLDEGK.W     |               |
| 246 - 250   | 697.4007  | 696.3934  | 696.3707  | 33  | 0    | K.WQHVK.E               |               |
| 260 - 267   | 921.5304  | 920.5231  | 920.4538  | 75  | 0    | K.MFSPGNLR.A            |               |
| 260 - 267   | 937.5308  | 936.5235  | 936.4487  | 80  | 0    | K.MFSPGNLR.A            | Oxidation (M) |
| 268 - 277   | 1161.6052 | 1160.5979 | 1160.4986 | 86  | 0    | R.ATFDNSEYSK.L          |               |
| 278 - 284   | 913.5527  | 912.5455  | 912.4957  | 55  | 0    | K.LIDYYVK.E             |               |
| 278 - 286   | 1170.7138 | 1169.7065 | 1169.6332 | 63  | 1    | K.LIDYYVKEK.Y           |               |
| 285 - 290   | 809.4838  | 808.4766  | 808.4443  | 40  | 1    | K.EKYTLR.Y              |               |
| 291 - 305   | 1649.9934 | 1648.9861 | 1648.8495 | 83  | 0    | R.YTGMVDPVNIIVK.E       | Oxidation (M) |
| 308 - 319   | 1235.7491 | 1234.7418 | 1234.6558 | 70  | 0    | K.GIFTNVTSPATA.A        |               |
| 308 - 321   | 1434.9022 | 1433.8949 | 1433.7878 | 75  | 1    | K.GIFTNVTSPATAK.L       |               |
| 353 - 360   | 959.5977  | 958.5905  | 958.5083  | 86  | 0    | K.TIINLDDR.T            |               |
| 353 - 368   | 1794.1065 | 1793.0992 | 1792.9319 | 93  | 1    | K.TIINLDDRTQVAYGSK.N    |               |
| 369 - 373   | 644.4071  | 643.3998  | 643.3653  | 54  | 0    | K.NEIR.F                |               |

Spot No.: **65**

Mascot score: **84**    Sequence coverage %: **29**

NCBI accession No.: **gi| 15234171**

Matched peptides No.: **29**

Total peptides No.: **106**

Calculated Mr: **87227**

Calculated pI: **5.06**

### Annotated PMF spectra:

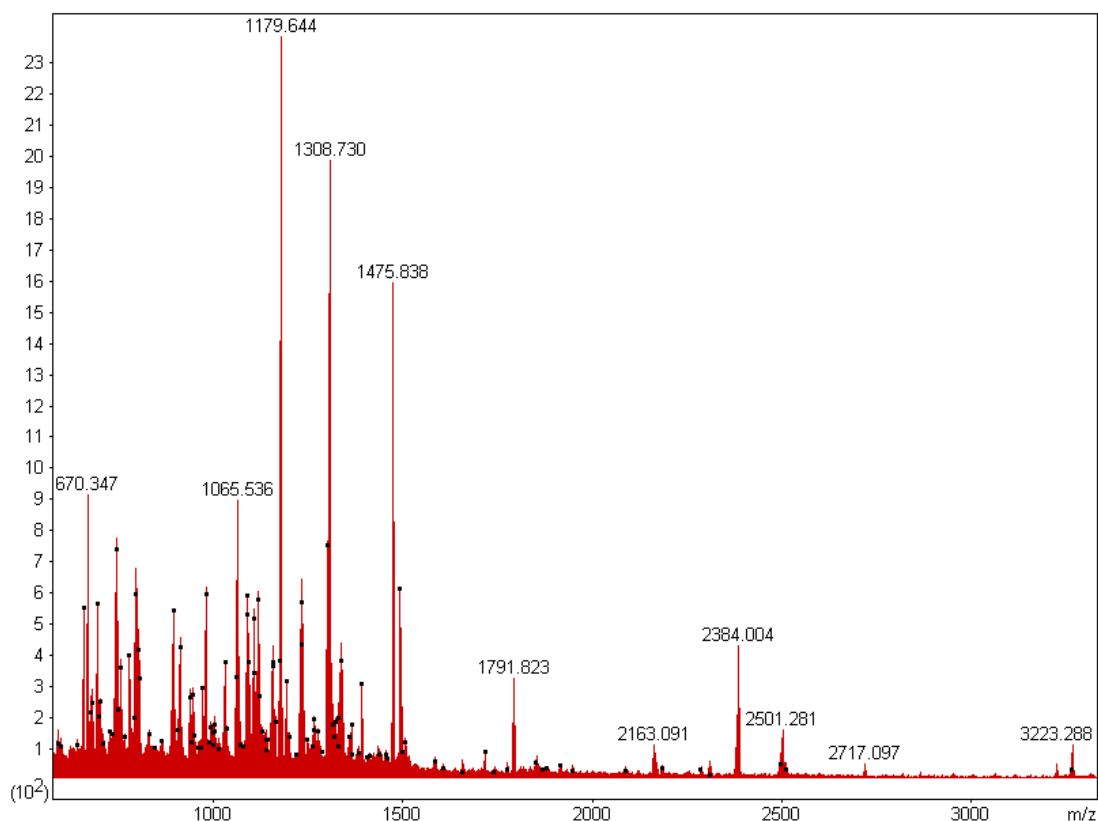

### Probability Based Mowse Score:

Protein score is  $-10 \cdot \log(P)$ , where P is the probability that the observed match is a random event. Protein scores greater than 72 are significant ( $p < 0.05$ ).

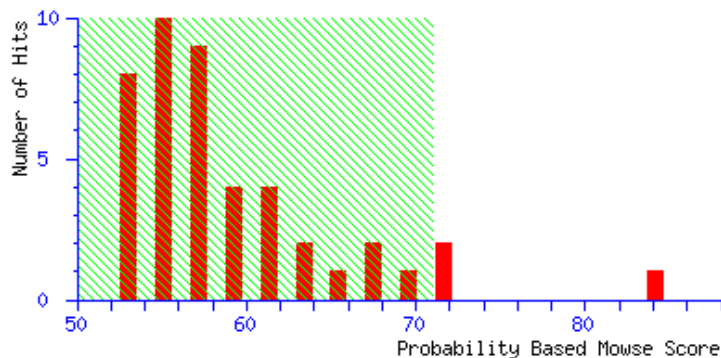

## Matched peptide sequences: shown in **Bold Red**

```

1 MEDLKTDDAL SLPVVSNDGG IIEPELQLPQ AIPTELENNE EENGTIQQSQ
51 SEEDSAENGG IYDDTFLPS KSQVKETQDS PTPPSFVSPS AEIVLPRVNT
101 KYEAEGTTRN AVSPRPLYSP RSIGSPRALL SPRFAGSSSP LSNGTPIISM
151 SFRDSIDTAS PFESVKEAVS KFGGITDWKA HRMKVLERRN FVEQELDKIQ
201 EEIPEYKKKS EMVEMSKMLA VEELESTKRL IEELKLNLEK AETEEQQAKQ
251 DSELAKLRVQ EMEQGIADDA SVASKAQLEV AQARHTSAIS ELESVKEELQ
301 TLQNEYDALV KEKDLAVKEA EEAVIASKEV ERKVEELTIE LIATKESLEC
351 AHSSHLEAEE HRIGAAMLRD QETHRWEKEL KQAEELQRL KQHLVSTKEL
401 QVKLEFASAL LLDLKELAD HKESSKVKEE TSETVVTNIE ISLQEKTTDI
451 QKAVASAKKE LEEVNAVVEK ATSEVNCLKV ASSSLRLEID KEKSALDSLK
501 QREGMASVTV ASLEAEIDIT RCEIALVKSK EKETREEMVE LPKQLQQASQ
551 EADEAKSFAE LAREELRKSQ EEAEQAKAGA STMESRFAA QKEIEAIKAS
601 ERLALAAIKA LQSESSSKE NAVDSPRTVT LTIEEYYELS KRAHEAEEAA
651 NARVAAAVSE VGEAKETEK SLEKLEEVNK EMVERKATLA GAMEKAEKAK
701 EGKLGVEQEL RKWREVSEKK RKNSSSHGKS IQGSKEKEAE TSVSNETETN
751 PIPQVNPVKK KKKLFFRFFM FLMKKKSHK

```

## Matched peptides information:

| Start - End | Observed  | Mr(expt)  | Mr(calc)  | ppm | Miss | Sequence                      |
|-------------|-----------|-----------|-----------|-----|------|-------------------------------|
| 61 - 71     | 1329.7001 | 1328.6928 | 1328.6322 | 46  | 0    | K.IYDDTFLPSK.S                |
| 98 - 109    | 1368.6938 | 1367.6865 | 1367.6681 | 13  | 1    | R.VNTKYEAE <b>GTRN</b> .M     |
| 172 - 182   | 1287.6776 | 1286.6703 | 1286.6520 | 14  | 1    | K.FGGITDWKA <b>HR</b> .M      |
| 189 - 198   | 1277.6978 | 1276.6905 | 1276.6411 | 39  | 1    | R.RNFVEQELDK.I                |
| 190 - 198   | 1121.5666 | 1120.5593 | 1120.5400 | 17  | 0    | R.RNFVEQELDK.I                |
| 218 - 228   | 1249.6508 | 1248.6435 | 1248.6271 | 13  | 0    | K.MLAVEELESTK.R               |
| 218 - 228   | 1265.6499 | 1264.6426 | 1264.6220 | 16  | 0    | K.MLAVEELESTK.R Oxidation (M) |
| 241 - 249   | 1033.5272 | 1032.5199 | 1032.4723 | 46  | 0    | K.AETEEQQAK.Q                 |
| 259 - 275   | 1791.8231 | 1790.8158 | 1790.8356 | -11 | 0    | R.VEMEQGIADDA <b>SVASK</b> .A |
| 285 - 296   | 1300.6140 | 1299.6067 | 1299.6670 | -46 | 0    | R.HTSAISELESVK.E              |
| 312 - 318   | 802.4502  | 801.4429  | 801.4596  | -21 | 1    | K.EKDLAVK.E                   |
| 334 - 345   | 1358.7618 | 1357.7545 | 1357.7704 | -12 | 0    | K.VEELTIELIATK.E              |
| 363 - 375   | 1497.8309 | 1496.8236 | 1496.7518 | 48  | 1    | R.IGAAMLRD <b>QETHR</b> .W    |
| 404 - 415   | 1332.6919 | 1331.6846 | 1331.7700 | -64 | 0    | K.LEFASALLDLK.K               |
| 417 - 422   | 712.3650  | 711.3577  | 711.3551  | 4   | 0    | K.ELADHK.E                    |
| 447 - 458   | 1232.6332 | 1231.6259 | 1231.6772 | -42 | 1    | K.TTDIQKAVASAK.K              |
| 522 - 528   | 832.4753  | 831.4680  | 831.4524  | 19  | 0    | R.CEIALVK.S                   |
| 557 - 563   | 793.4058  | 792.3985  | 792.4130  | -18 | 0    | K.SFAELAR.E                   |
| 557 - 567   | 1320.6810 | 1319.6737 | 1319.6833 | -7  | 1    | K.SFAELAREELR.K               |
| 593 - 602   | 1145.5637 | 1144.5564 | 1144.6087 | -46 | 1    | K.EIEAIKASER.L                |
| 599 - 609   | 1142.5800 | 1141.5727 | 1141.6819 | -96 | 1    | K.ASERLALAAIK.A               |
| 603 - 609   | 699.4271  | 698.4198  | 698.4690  | -70 | 0    | R.LALAAIK.A                   |
| 610 - 619   | 1065.5361 | 1064.5288 | 1064.4986 | 28  | 0    | K.ALQSESSSK.E                 |
| 654 - 665   | 1130.5620 | 1129.5547 | 1129.5979 | -38 | 0    | R.VAAAVSEVGEAK.E              |
| 681 - 685   | 679.3751  | 678.3678  | 678.3007  | 99  | 0    | K.EMVERK.A Oxidation (M)      |
| 681 - 686   | 807.3885  | 806.3812  | 806.3956  | -18 | 1    | K.EMVERK.A Oxidation (M)      |
| 768 - 774   | 963.4684  | 962.4612  | 962.4758  | -15 | 0    | R.FFMFLMK.K                   |
| 768 - 774   | 995.5084  | 994.5011  | 994.4656  | 36  | 0    | R.FFMFLMK.K 2 Oxidation (M)   |
| 768 - 775   | 1107.5590 | 1106.5517 | 1106.5657 | -13 | 1    | R.FFMFLMKK.K Oxidation (M)    |

Spot No.: **66**

Mascot score: **82**    Sequence coverage %: **40**

NCBI accession No.: **gi| 6093122**

Matched peptides No.: **19**

Total peptides No.: **108**

Calculated Mr: **65243**

Calculated pI: **9.01**

### Annotated PMF spectra:

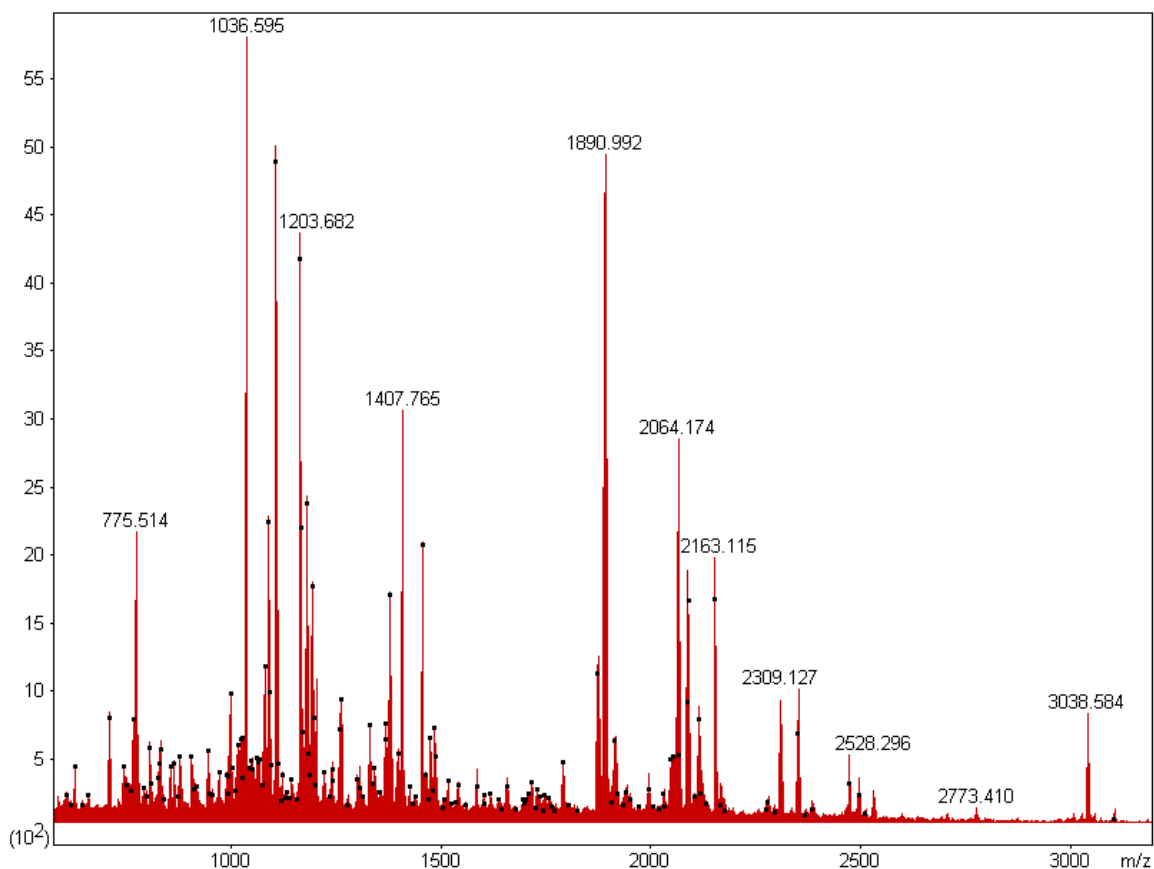

### Probability Based Mowse Score:

Protein score is  $-10 \cdot \log(P)$ , where P is the probability that the observed match is a random event. Protein scores greater than 72 are significant ( $p < 0.05$ ).

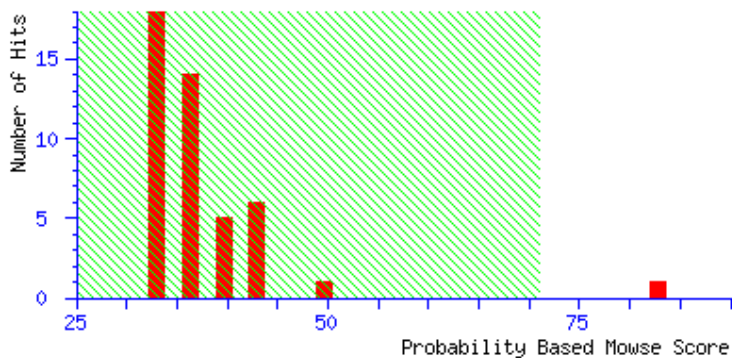

Matched peptide sequences: shown in **Bold Red**

```

1 MIGKVVVSVSVA SILLIVGVAI GVVAYINKNG DANLSPQMKA VRGICEATSD
51 KASCVKTLEP VKSDDPNKLI KAFMLATRDA ITQSSNFTGK TEENLGSGIS
101 PNNKAVLDYC KKVFMYALED LSTIVEEMGE DLNQIGSKID QLKQWLTGVY
151 NYQTDCLDDI EEDDLRKTIG EGIASSKILT SNAIDIFHTV VSAMAKLNLK
201 VEDFKNMTGG IFAPSDKGAA FVNKGTPPVA DDSPVADPDG PARRLLEDID
251 ETGIPTWVSG ADRKLMAKAG RGSNDGGARI RATFVVAKDG SGQFKTVQQA
301 VNACPEKNPG RCIIHIKAGI YREQVIIPKK KNNIFMFGDG ARKTVISYNR
351 SVKLSPGTTT SLSGTVQVES EGFMAKWIGF KNTAGPMGHQ AVAIRVNGDR
401 AVIFNCRFDG YQDTLYVNNG RQFYRNIIVVS GTVDFIFGKS ATVIQNSLIV
451 VRKGNKGQFN TVTADGNEKG LAMKIGIVLQ NCRIVPKKL AAERLIVESY
501 LGRPWKKFST TVIINSEIGD VIRPEGWKIW DGESFHKSCR YVEYNNRGPG
551 AITNRRVNWV KIARSAAEVN DFTVANWLGP INWIQEANVP VILGL

```

Matched peptides information:

| Start - End | Observed  | Mr(expt)  | Mr(calc)  | ppm | Miss | Sequence                              |
|-------------|-----------|-----------|-----------|-----|------|---------------------------------------|
| 29 - 42     | 1516.7710 | 1515.7637 | 1515.7464 | 11  | 1    | K.NGDANLSPQMKAVR.G Oxidation (M)      |
| 57 - 68     | 1342.7524 | 1341.7451 | 1341.6776 | 50  | 1    | K.TLEPVKSDDPNK.L                      |
| 63 - 71     | 1029.6295 | 1028.6222 | 1028.5502 | 70  | 1    | K.SDDPNKLIK.A                         |
| 69 - 78     | 1179.6601 | 1178.6528 | 1178.6845 | -27 | 1    | K.LIKAFMLATR.D Oxidation (M)          |
| 72 - 78     | 809.4990  | 808.4917  | 808.4265  | 81  | 0    | K.AFMLATR.D                           |
| 91 - 111    | 2309.1274 | 2308.1201 | 2308.1005 | 9   | 1    | K.TEENLGSGISPNNKAVLDYCK.K             |
| 167 - 177   | 1090.5915 | 1089.5842 | 1089.6030 | -17 | 1    | R.KTIGEGIASCK.I                       |
| 178 - 196   | 2047.0786 | 2046.0713 | 2046.0820 | -5  | 0    | K.ILTSNAIDIPHTVVSAMAK.L Oxidation (M) |
| 206 - 224   | 1890.9918 | 1889.9845 | 1889.9305 | 29  | 1    | K.NMTGGIFAPSDKGAAPVNK.G Oxidation (M) |
| 218 - 243   | 2471.2484 | 2470.2411 | 2470.2088 | 13  | 1    | K.GAAPVNKGTPPVADDSFVADPDGPAR.R        |
| 245 - 263   | 2087.0282 | 2086.0209 | 2086.0219 | -0  | 0    | R.LLEDIDETGIPTWVSGADR.K               |
| 265 - 271   | 746.4933  | 745.4861  | 745.4268  | 79  | 1    | K.LMAKAGR.G                           |
| 289 - 307   | 2064.1742 | 2063.1669 | 2062.9742 | 93  | 1    | K.DSGSQFKTVQQAVNACPEK.N               |
| 332 - 342   | 1241.6377 | 1240.6304 | 1240.5659 | 52  | 0    | K.NNIFMFGDGAR.K                       |
| 332 - 343   | 1369.7272 | 1368.7199 | 1368.6608 | 43  | 1    | K.NNIFMFGDGARK.T                      |
| 377 - 395   | 2054.0916 | 2053.0843 | 2053.0680 | 8   | 1    | K.WIGFKNTAGPMGHQAVAIR.V               |
| 440 - 452   | 1399.7358 | 1398.7285 | 1398.8195 | -65 | 0    | K.SATVIQNSLIVVR.K                     |
| 495 - 503   | 1049.5827 | 1048.5754 | 1048.5917 | -15 | 0    | R.LIVESYLGR.P                         |
| 508 - 523   | 1763.8590 | 1762.8517 | 1762.9465 | -54 | 0    | K.FSTTVIINSEIGDVIR.P                  |

Spot No.: **67**

Mascot score: **81**    Sequence coverage %: **13**

NCBI accession No.: **gi| 302608108**

Matched peptides No.: **14**

Total peptides No.: **41**

Calculated Mr: **109709**

Calculated pI: **5.88**

### Annotated PMF spectra:

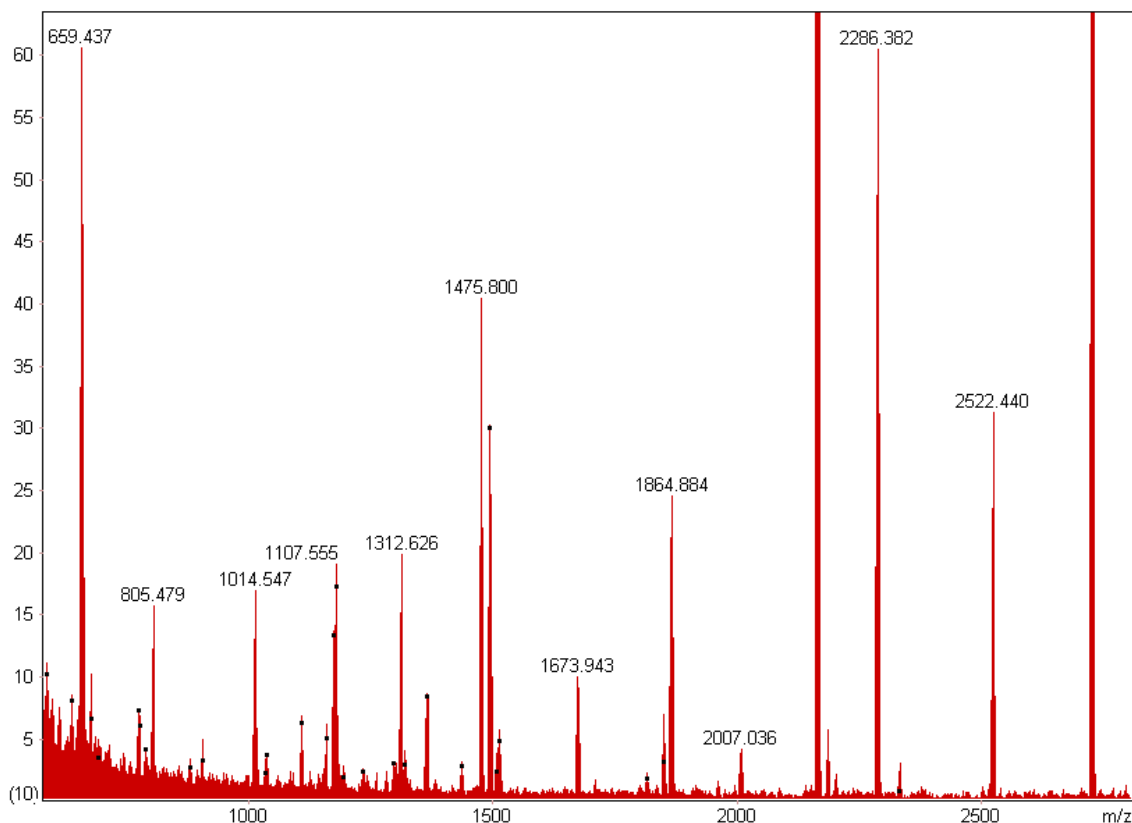

### Probability Based Mowse Score:

Protein score is  $-10 \cdot \log(P)$ , where P is the probability that the observed match is a random event. Protein scores greater than 72 are significant ( $p < 0.05$ ).

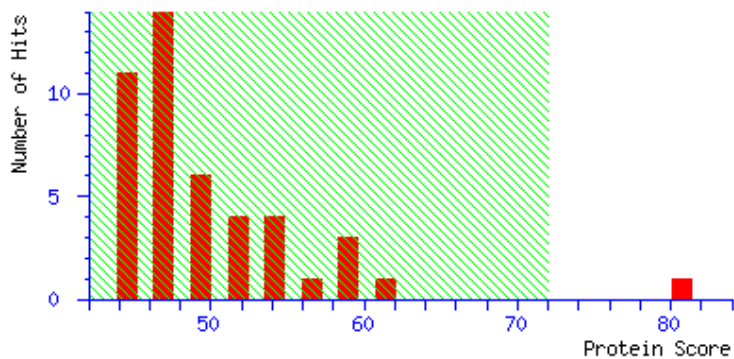

Matched peptide sequences: shown in **Bold Red**

```

1 MASSERHHSI DAQVRNLAPG KVSEDDKLVE YDVLLMDRFL DILQDLHGPG
51 IREFVQDCYE LSAEYEGDRN AARLKELGSR LASLAPADAI LVAGSIQHML
101 NLANLAEVQ IAHRRRNKLK SGDFADEGSA TTESNIEETI KRLVDLGKSK
151 EEVFEALKNQ TVDLVLT AHP TQSVRRSLLQ KHARIRNCLT QLNAKDITDD
201 EKKEIDEDLH RAIQAAFRTD EIRRAQPTPQ DEMRYGMSYI HETIWKGVPK
251 FLRRVDTALK NIGIDERLPY NVPLIQFCSW MGGDRDGNPR VTPEVTRDVC
301 LLSRMMAANL YFSGLEDLMF ELSMWRCNDE LRARAQEIHS APKKAAKHYI
351 EFWKQIPLSE PYRVVLGNVR DKLYNTRERA RQLLTNEVSD IPEESVFSNV
401 QEFLEPLELC YKSLCESGDK TIADGSLLDF LRQVTAFGLS LVKLDIRQES
451 ERHTDVIDAI TTHIGIGSYR SWPEEKRQEW LLSSELRGKRP LLAPDMPQTE
501 EIADVLGCFR VLAELPRDSF GPYIISMATA PSDVLAVELL QRECHVKEPL
551 PVVPLFERLA DLQNAPEASME RLFSVDWYLE RINGKQQVMI GYSDSGKDAG
601 RLSAAWQLYR AQEELAQVAK RYSVKLTMFH GRGGTVGRGG GPSHLAILSQ
651 PPDTINGSIR VTVQGEVIEH SFGEEHLCFR TLERFTAATL EHGMPVSP
701 KPEWRKLMDE MAVVATEEYR SIVVREPRFV EYFRSATPET EYGKMNIGSR
751 PAKRKPQGGI TSLRAIPWIF SWTQTRFHLP VWLGVGAAFQ SAIKTDSKNI
801 QKLKEMYKEW PFFRVITDILL EMVFAKGDPS IAALYDELLV ADDLKPFGEQ
851 LRNKYLETQQ FLLQIAGHKE ILEADPFLKQ SLRLRNPYIT TLNVFQAYTL
901 KLMRDPNFQV KKQPPLSKEF SDEKKPAGLV ELNPASEYAP GLEDTLILTM
951 KGIAAGMQNT G

```

Matched peptides information:

| Start - End | Observed  | Mr (expt) | Mr (calc) | ppm | Miss | Sequence                             |
|-------------|-----------|-----------|-----------|-----|------|--------------------------------------|
| 28 - 38     | 1365.6647 | 1364.6574 | 1364.7010 | -32 | 0    | K.LVEYDVL <b>LMDR.F</b>              |
| 149 - 158   | 1179.6158 | 1178.6085 | 1178.6183 | -8  | 1    | K.SKEEV <b>FEAL.N</b>                |
| 327 - 334   | 1033.5170 | 1032.5097 | 1032.4771 | 32  | 1    | R. <b>CNDELRAR.A</b>                 |
| 421 - 432   | 1320.6270 | 1319.6197 | 1319.7085 | -67 | 0    | K.TIADG <b>SLLDFLR.Q</b>             |
| 453 - 476   | 2725.5368 | 2724.5295 | 2724.3507 | 66  | 1    | R. <b>HTDVIDAITTHIGIGSYRSWPEEK.R</b> |
| 471 - 476   | 775.3743  | 774.3670  | 774.3548  | 16  | 0    | R. <b>SWPEEK.R</b>                   |
| 586 - 597   | 1312.6262 | 1311.6189 | 1311.6129 | 5   | 0    | K. <b>QQVMIGYSDSGK.D</b>             |
| 602 - 610   | 1107.5548 | 1106.5475 | 1106.5873 | -36 | 0    | R. <b>LSAAWQLYR.A</b>                |
| 702 - 705   | 587.2878  | 586.2806  | 586.2863  | -10 | 0    | K. <b>PEWR.K</b>                     |
| 745 - 750   | 677.3478  | 676.3405  | 676.3326  | 12  | 0    | K. <b>MNIGSR.P</b>                   |
| 745 - 750   | 693.3537  | 692.3464  | 692.3275  | 27  | 0    | K. <b>MNIGSR.P</b> Oxidation (M)     |
| 809 - 814   | 881.4321  | 880.4248  | 880.4232  | 2   | 0    | K. <b>EWPFER.V</b>                   |
| 870 - 879   | 1174.6735 | 1173.6662 | 1173.6281 | 32  | 0    | K.E <b>I</b> LEAD <b>PFLK.Q</b>      |
| 886 - 904   | 2286.3819 | 2285.3746 | 2285.2242 | 66  | 1    | R. <b>NPYITTLNVFQAYTLKLMR.D</b>      |

Spot No.: **68**

Mascot score: **236**    Sequence coverage %: **33**

NCBI accession No.: **gi| 7525018**

Matched peptides No.: **19**

Total peptides No.: **29**

Calculated Mr: **55351**

Calculated pI: **5.19**

### Annotated PMF spectra:

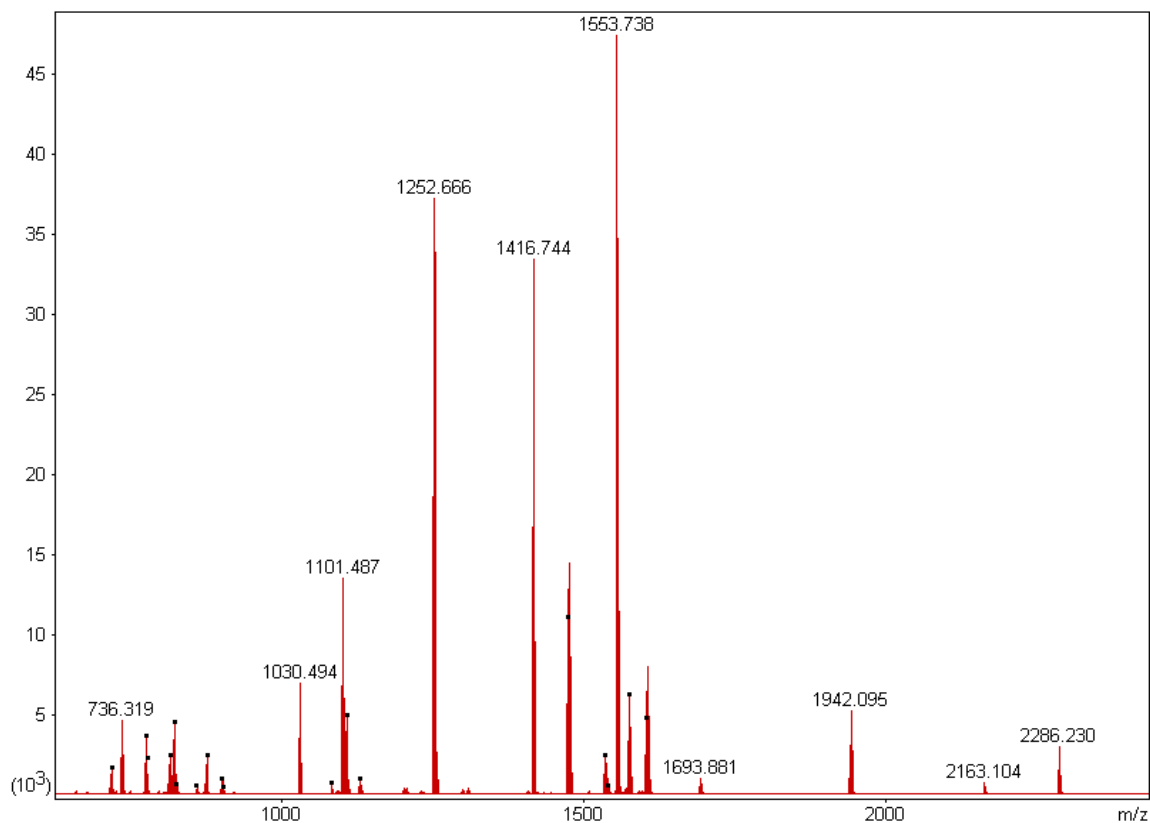

### Probability Based Mowse Score:

Protein score is  $-10 \cdot \log(P)$ , where P is the probability that the observed match is a random event. Protein scores greater than 72 are significant ( $p < 0.05$ ).

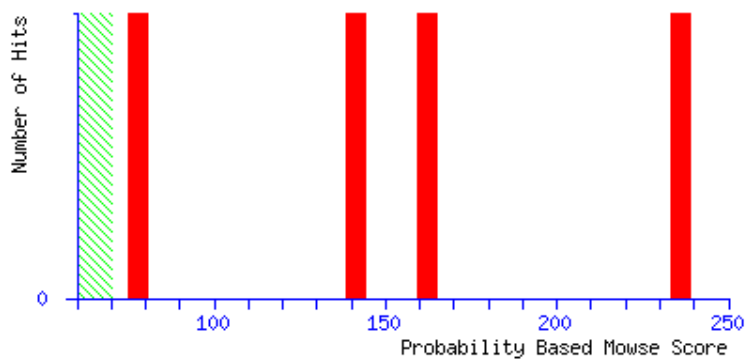



Matched peptide sequences: shown in **Bold Red**

**1** MVTIR**ADEIS NIIRERIEQY NREVTIVNTG TVLQVGDGIA** RIYGLDEVMA  
**51** GELVEFEEGT IGIALNLESN NVGVVLMGDG LMIQEGSSVK ATGK**IAQIPV**  
**101** **SEAYLGRVIN ALANPIDGRG** KISASESRLI ESPAPGIISR RSVYEPLQTG  
**151** LIAIDSMIPI GRGQ**RELIIG DRQ**TGKTAVA TDILNQGGQ NVICVYVAIG  
**201** Q**KASSVAQVV TSLQER**GAME YTIVVAETAD SPATLQYLAP YTGAALAEYF  
**251** MYR**EQHTLII YDDL**SKQAQA YR**QMSLLRR PPGREAYPGD VFYLHSR**LLE  
**301** RAAKLSSQLG EGSMTALPIV ETQSGDVSAY IPTNVISITD GQIFLSADLF  
**351** NAGIRPAINV GISVSRVGS AAIKAMKQVA GKLKLELAQF AELEAFSQFS  
**401** SDDLK**ATQNQ LAR**GQRLREL LKQSQSAPLT VEEQIMTIYT GTNGYLDGLE  
**451** IGQVR**KFLVQ LRTYLKTNKP QFQEII**ASTK TLTAEAESFL **KEGIQEQLER**  
**501** **FLLQEKV**

Matched peptides information:

| Start - End | Observed  | Mr(expt)  | Mr(calc)  | ppm | Miss | Sequence                  |
|-------------|-----------|-----------|-----------|-----|------|---------------------------|
| 6 - 14      | 1030.4945 | 1029.4872 | 1029.5454 | -57 | 0    | R.ADEISNIIR.E             |
| 15 - 22     | 1107.5012 | 1106.4939 | 1106.5468 | -48 | 1    | R.ERIEQYNR.E              |
| 17 - 22     | 822.3564  | 821.3491  | 821.4031  | -66 | 0    | R.IEQYNR.E                |
| 23 - 41     | 1942.0950 | 1941.0877 | 1941.0531 | 18  | 0    | R.EVTIVNTGTVLQVGDGIAR.I   |
| 95 - 107    | 1416.7442 | 1415.7369 | 1415.7772 | -28 | 0    | K.IAQIPVSEAYLGR.V         |
| 108 - 119   | 1252.6660 | 1251.6587 | 1251.6935 | -28 | 0    | R.VINALANPIDGR.G          |
| 166 - 172   | 815.4101  | 814.4028  | 814.4548  | -64 | 0    | R.ELIIGDR.Q               |
| 203 - 216   | 1474.7530 | 1473.7457 | 1473.7787 | -22 | 0    | K.ASSVAQVVTSLQER.G        |
| 254 - 266   | 1574.8424 | 1573.8351 | 1573.7988 | 23  | 0    | R.EQHTLIIYDDLK.Q          |
| 267 - 272   | 736.3195  | 735.3122  | 735.3664  | -74 | 0    | K.QAQAYR.Q                |
| 273 - 279   | 876.4255  | 875.4183  | 875.4899  | -82 | 0    | R.QMSLLLR.R Oxidation (M) |
| 280 - 284   | 582.2973  | 581.2900  | 581.3398  | -86 | 0    | R.RPPGR.E                 |
| 285 - 297   | 1553.7381 | 1552.7308 | 1552.7310 | -0  | 0    | R.EAYPGDVFYLHSR.L         |
| 406 - 413   | 901.4334  | 900.4261  | 900.4777  | -57 | 0    | K.ATQNQLAR.G              |
| 456 - 462   | 903.4931  | 902.4858  | 902.5702  | -93 | 1    | R.KFLVQLR.T               |
| 457 - 462   | 775.4216  | 774.4144  | 774.4752  | -79 | 0    | K.FLVQLR.T                |
| 467 - 480   | 1604.9052 | 1603.8979 | 1603.8569 | 26  | 0    | K.TNKPQFQEIIASTK.T        |
| 492 - 500   | 1101.4873 | 1100.4800 | 1100.5462 | -60 | 0    | K.EGIQEQLER.F             |
| 501 - 506   | 777.3843  | 776.3771  | 776.4432  | -85 | 0    | R.FLLQEK.V                |

Spot No.: **69**

Mascot score: **82**    Sequence coverage %: **31**

NCBI accession No.: **gi| 157830716**

Matched peptides No.: **8**

Total peptides No.: **103**

Calculated Mr: **27386**

Calculated pI: **6.23**

### Annotated PMF spectra:

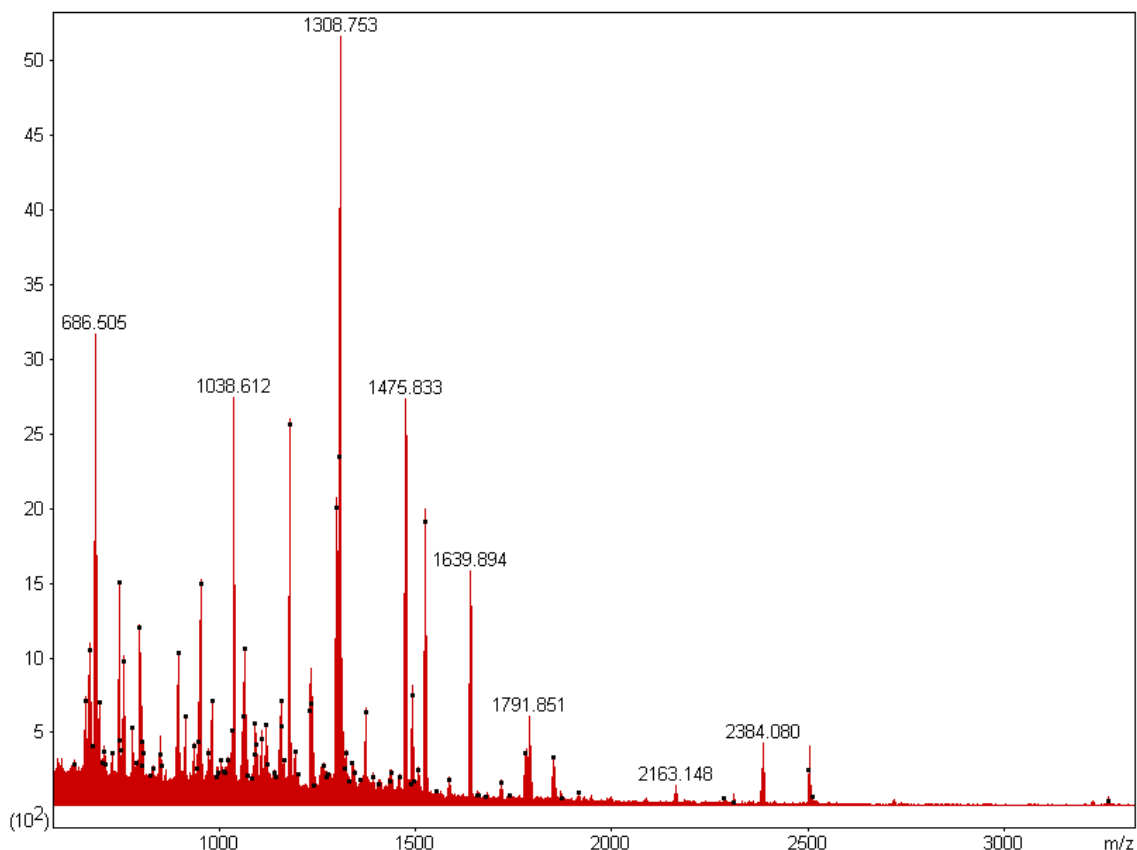

### Probability Based Mowse Score:

Protein score is  $-10 \cdot \log(P)$ , where P is the probability that the observed match is a random event. Protein scores greater than 72 are significant ( $p < 0.05$ ).

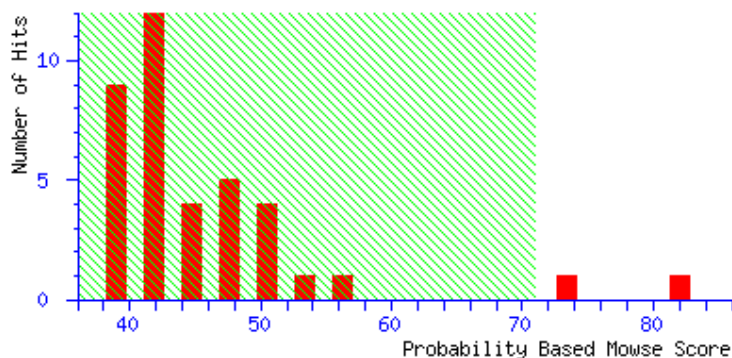

Matched peptide sequences: shown in **Bold Red**

**1 YPIFAQQNYE** **NPRE**EATGRIV CANCHLASKP VDIEVPQAVL PDTVFEAVVK  
**51 IPYDMLKQV** LANGKKGALN VGAVLILPEG FELAPPDRIS PEMKEKIGNL  
**101 SFQNYRPNKK** **NILVIGPVP****G** **QK**YSEITFPI LAPDPATNKD VHFLK**YPIY****V**  
**151 GGNR**GRGQIY PDGSKSNMTV YNATAGGIIS KILR**KEGGY** **EITIVDASNE**  
**201 RQVIDIIPRG** **LELLVSEGES** **IKLD**QPLTSN PNVGGFGQGD AEIVLQDPLR  
**251**

Matched peptides information:

| Start - End | Observed  | Mr(expt)  | Mr(calc)  | ppm | Miss | Sequence                  |
|-------------|-----------|-----------|-----------|-----|------|---------------------------|
| 1 - 13      | 1639.8944 | 1638.8871 | 1638.7790 | 66  | 0    | - .YPIFAQQNYENPR.E        |
| 51 - 58     | 1023.5653 | 1022.5580 | 1022.5107 | 46  | 0    | K.IPYDMLK.Q Oxidation (M) |
| 111 - 122   | 1234.6917 | 1233.6844 | 1233.7445 | -49 | 0    | K.NILVIGPVP <b>GQK</b> .Y |
| 146 - 154   | 1038.6123 | 1037.6050 | 1037.5294 | 73  | 0    | K.YPIYVGGNR.G             |
| 186 - 201   | 1780.9733 | 1779.9660 | 1779.8639 | 57  | 1    | K.EGGYEITIVDASNER.Q       |
| 188 - 201   | 1523.8261 | 1522.8188 | 1522.7263 | 61  | 0    | K.GGYEITIVDASNER.Q        |
| 202 - 209   | 953.6410  | 952.6338  | 952.5706  | 66  | 0    | R.QVIDIIPR.G              |
| 210 - 222   | 1373.7862 | 1372.7789 | 1372.7449 | 25  | 0    | R.GLELLVSEGESIK.L         |

Spot No.: **70**

Mascot score: **84** Sequence coverage %: **46**

NCBI accession No.: **gi| 222640350**

Matched peptides No.: **14**

Total peptides No.: **104**

Calculated Mr: **23549**

Calculated pI: **11.42**

### Annotated PMF spectra:

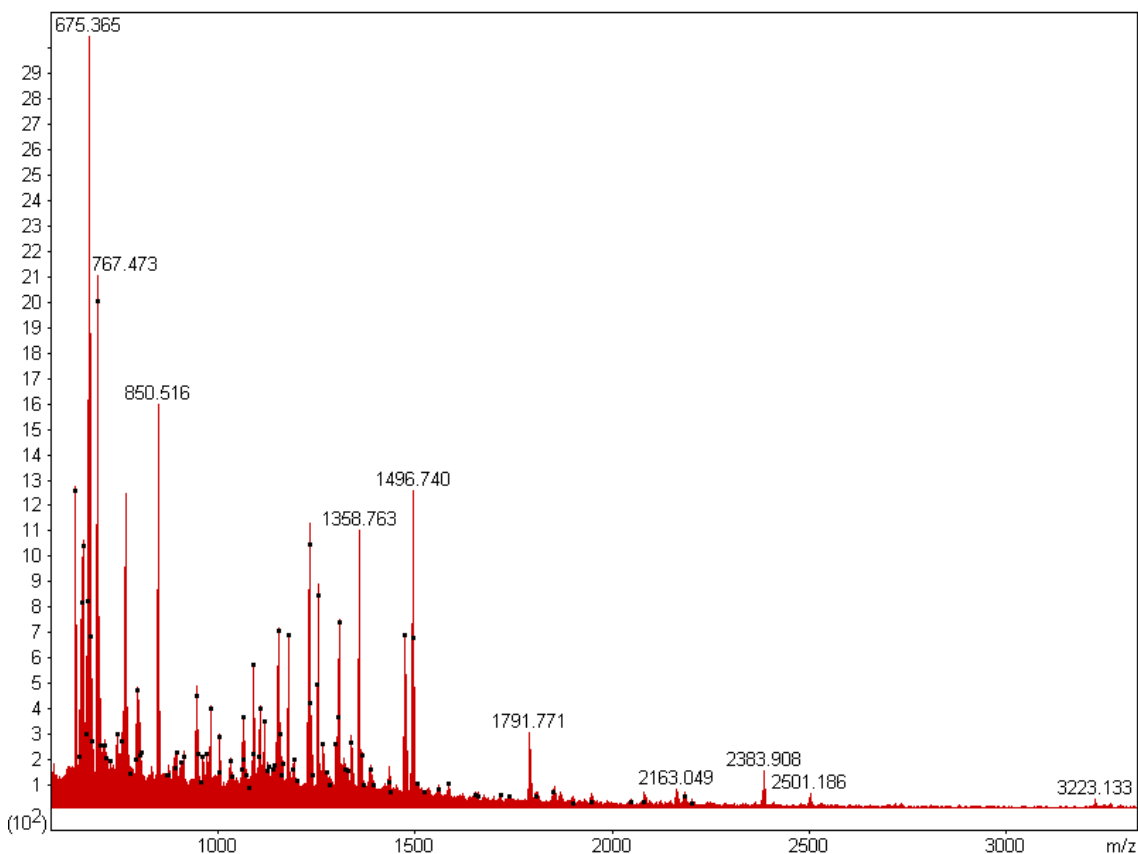

### Probability Based Mowse Score:

Protein score is  $-10 \cdot \log(P)$ , where P is the probability that the observed match is a random event. Protein scores greater than 72 are significant ( $p < 0.05$ ).

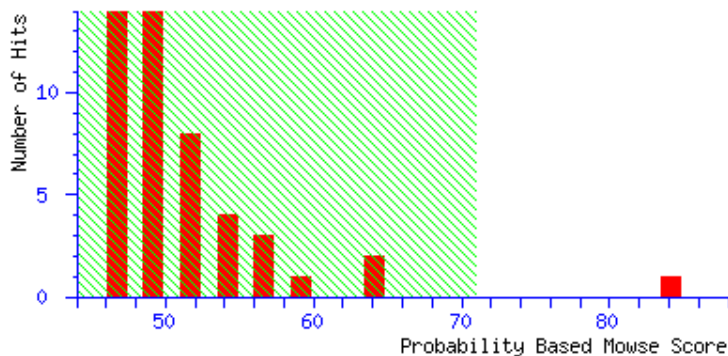

## Matched peptide sequences: shown in **Bold Red**

**1 MTGQTSGCCA LRIKLHLRVH IVEGRARLRL ASSTEFTRQ DPRPPWANRL**  
**51 ATMARYAARW IYMALMMWAH DQKGASNSGE DLARQKGRVG GGSRMGEARN**  
**101 RNRGKAEIEA VGGWRRRTAA RCVGNIGGGR DASAALGAIG VGRGGCEDVV**  
**151 GGRWRGHRE ERWTATTIQG AQRRTDRDD SGGERC GAES EGTAAVTGGK**  
**201 NGRQDGRRPI WRNRW**

## Matched peptides information:

| Start - End | Observed  | Mr(expt)  | Mr(calc)  | ppm  | Miss | Sequence                         |
|-------------|-----------|-----------|-----------|------|------|----------------------------------|
| 1 - 12      | 1254.6884 | 1253.6811 | 1253.5493 | 105  | 0    | -.MTGQTSGCCALR.I Oxidation (M)   |
| 1 - 14      | 1495.7433 | 1494.7360 | 1494.7283 | 5    | 1    | -.MTGQTSGCCALRIK.L Oxidation (M) |
| 2 - 12      | 1107.5605 | 1106.5532 | 1106.5139 | 36   | 0    | M.TGQTSGCCALR.I                  |
| 13 - 18     | 779.4091  | 778.4018  | 778.5177  | -149 | 1    | R.IKLHLR.V                       |
| 28 - 37     | 1179.6192 | 1178.6119 | 1178.6407 | -24  | 1    | R.LRLASSTEFR.T                   |
| 50 - 59     | 1139.5299 | 1138.5226 | 1138.5917 | -61  | 1    | R.LATMARYAAR.W Oxidation (M)     |
| 87 - 94     | 745.4284  | 744.4211  | 744.3991  | 30   | 1    | K.GRVGGSR.M                      |
| 89 - 99     | 1092.5432 | 1091.5359 | 1091.5142 | 20   | 1    | R.VGGGSRMGEAR.N Oxidation (M)    |
| 104 - 116   | 1329.6686 | 1328.6613 | 1328.6837 | -17  | 1    | R.GKAEELAVGGWR.R                 |
| 106 - 117   | 1300.5944 | 1299.5871 | 1299.6684 | -63  | 1    | K.AEELAVGGWRR.T                  |
| 131 - 143   | 1157.6105 | 1156.6032 | 1156.6200 | -15  | 0    | R.DASAALGAIVGR.G                 |
| 131 - 154   | 2201.0251 | 2200.0178 | 2200.0655 | -22  | 1    | R.DASAALGAIVGRGGCEDVVGGGR.W      |
| 163 - 173   | 1232.6360 | 1231.6287 | 1231.6309 | -2   | 0    | R.WTATTIQGAQR.R                  |
| 163 - 174   | 1388.7182 | 1387.7109 | 1387.7320 | -15  | 1    | R.WTATTIQGAQRR.G                 |

Spot No.: **71**

Mascot score: **81** Sequence coverage %: **20**

NCBI accession No.: **gi| 44190501**

Matched peptides No.: **15**

Total peptides No.: **65**

Calculated Mr: **84907**

Calculated pI: **5.69**

### Annotated PMF spectra:

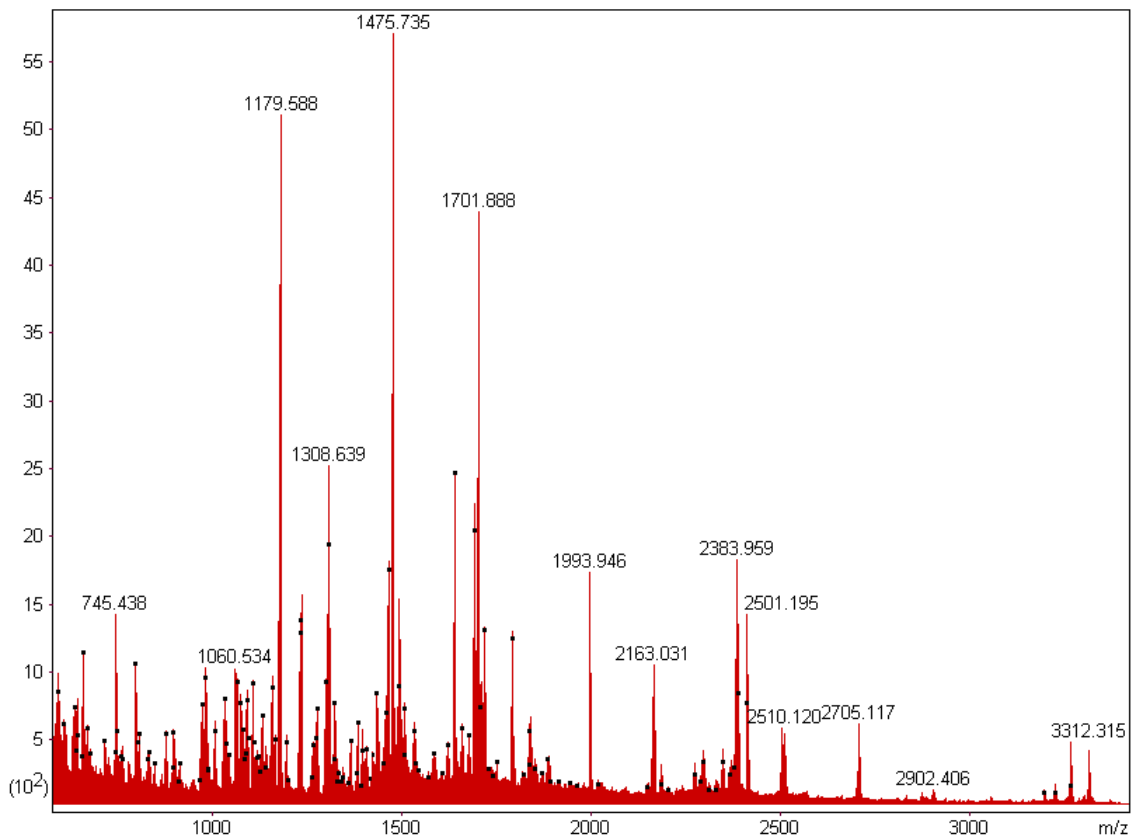

### Probability Based Mowse Score:

Protein score is  $-10 \cdot \log(P)$ , where P is the probability that the observed match is a random event. Protein scores greater than 72 are significant ( $p < 0.05$ ).

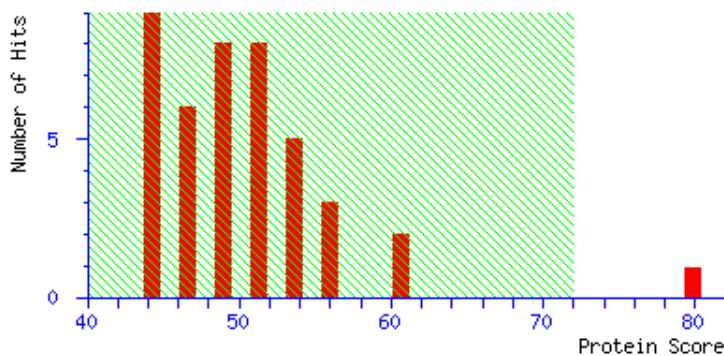

Matched peptide sequences: shown in **Bold Red**

```

1 MASMSSHSSIA LCGASASASA SDHLRSSTNG VSLRTLGRAM VASTKRNNLY
51 VTARLKKGKK FDHPWASNPD PNVKGGVLSY LSTFKPLGDT QKPVTLDFEK
101 PLVELEKKIV DVRKMAAETG LDFTDQIITL GTKYRQALKD LYTDLTPIQR
151 VNIARHPNRP TFLDHIHNIT DKFMELHGDR AGYDDPAIVT GIGTIDGKRY
201 MFIGHQKGRN TKENIMRNFG MPTPHGYRKA LRMMYYADHH GFPIVTFIDT
251 PGAYADLKSE ELGQGEAIAN NLRTMFGLKV PILSIVIGEG GSGGALAIGC
301 ANKMLMLENA VFYVASPEAC AAILWNSSKA APEAAEKLRI TSRELVKLNV
351 ADGIIPEPLG GAHADPSWTS QQIKIAINEN MNEFGKMSGE ELLKHRMAKY
401 RKIGVFIENA PVEPEIKVNM KRRDAVVSNS RKLEGEVEKL KEQILKAKET
451 SSSEDQPSSE VLNEMIKKLN SEIDDEYTEA ARTMGLEERL TAMRGEFSKA
501 SEEEHLVHPI LIEKIEKLEK EFNTRLSEAP NYESLKSCLD MLRDFSRKA
551 ALEAASVKNE INKRFQEAVD RPEVREKVEA IKAEVASSGA SSFEELSDEL
601 KEKVLTKGVE VEAEMAGVLK SMALELEAVK PNVAEQIFVP SENIQEKVEK
651 LNREISEKIE EVVRAPEIKS MVELLKVENA KASQTPGDTK VSQKIETLEQ
701 QIKQKIADAL SMSGLQEKQE ELEKELAVAR EVAAVKSEES LKEDDDDDDG
751 SESEKPEIIN PHFA

```

Matched peptides information:

| Start - End | Observed  | Mr (expt) | Mr (calc) | ppm  | Miss | Sequence                         |
|-------------|-----------|-----------|-----------|------|------|----------------------------------|
| 199 - 207   | 1179.5676 | 1178.5603 | 1178.6019 | -35  | 1    | K.RYMFIGHQK.G                    |
| 200 - 207   | 1023.3867 | 1022.3794 | 1022.5008 | -119 | 0    | R.YMFIGHQK.G                     |
| 274 - 279   | 712.4539  | 711.4466  | 711.3625  | 118  | 0    | R.TMFGLK.V Oxidation (M)         |
| 340 - 347   | 945.5091  | 944.5018  | 944.5655  | -67  | 1    | R.ITSRELVK.L                     |
| 375 - 386   | 1379.6308 | 1378.6235 | 1378.6551 | -23  | 0    | K.IAINENMNEFGK.M                 |
| 423 - 431   | 1003.5800 | 1002.5727 | 1002.5206 | 52   | 1    | R.RDAVVSNSR.K                    |
| 447 - 467   | 2308.8913 | 2307.8840 | 2308.0740 | -82  | 1    | K.AKETSSSEDQPSSEVLNEMIK.K        |
| 483 - 494   | 1407.6182 | 1406.6109 | 1406.7010 | -64  | 1    | R.TMGLEERTAMR.G                  |
| 500 - 517   | 2113.8344 | 2112.8271 | 2113.1419 | -149 | 1    | K.ASEEEHLVHPILIEKIEK.L           |
| 518 - 525   | 1036.5256 | 1035.5183 | 1035.5349 | -16  | 1    | K.LKEEFNTR.L                     |
| 548 - 558   | 1058.5068 | 1057.4995 | 1057.6131 | -107 | 1    | R.AKAALAAASVK.N                  |
| 607 - 620   | 1477.6103 | 1476.6030 | 1476.7494 | -99  | 1    | K.TKGEVEAEMAGVLK.S Oxidation (M) |
| 621 - 630   | 1090.5327 | 1089.5254 | 1089.5740 | -45  | 0    | K.SMALELEAVK.P                   |
| 719 - 724   | 775.5136  | 774.5063  | 774.3759  | 168  | 0    | K.QEELEK.E                       |
| 743 - 755   | 1455.5994 | 1454.5921 | 1454.4805 | 77   | 0    | K.EDDDDDGSESEK.P                 |

Spot No.: 72

Mascot score: 102    Sequence coverage %: 28

NCBI accession No.: gi| 15220329

Matched peptides No.: 11

Total peptides No.: 34

Calculated Mr: 50194

Calculated pI: 4.93

### Annotated PMF spectra:

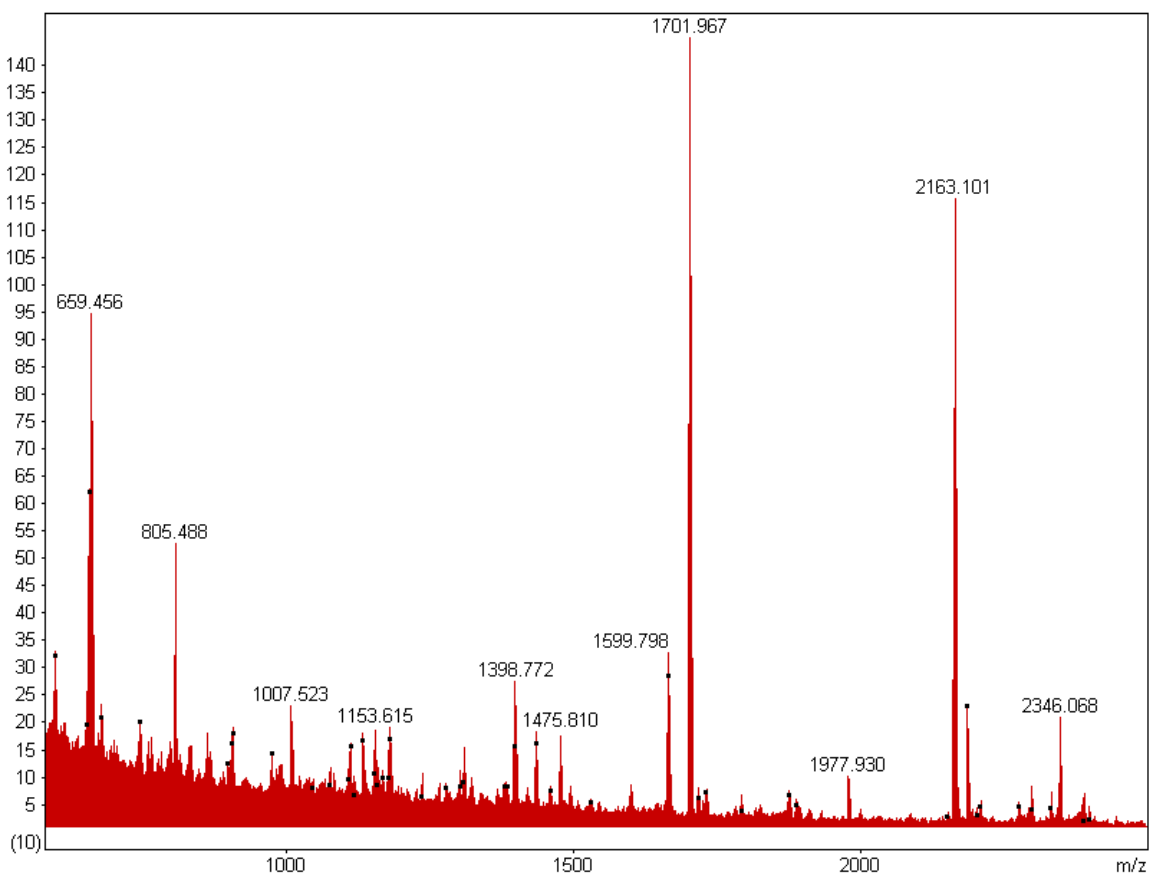

### Probability Based Mowse Score:

Protein score is  $-10 \cdot \log(P)$ , where P is the probability that the observed match is a random event. Protein scores greater than 72 are significant ( $p < 0.05$ ).

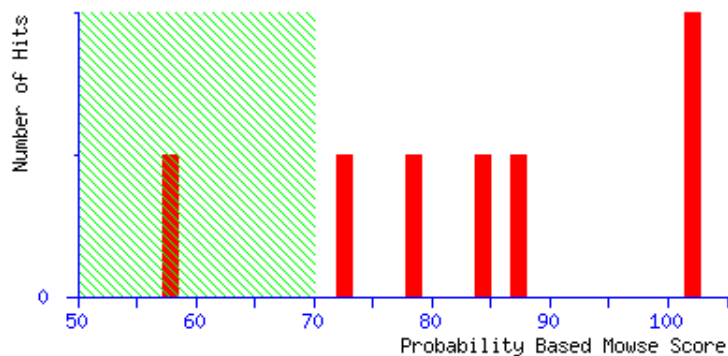



Matched peptide sequences: shown in **Bold Red**

1 MRECISIHIG QAGIQVGNAC WELYCLEHGI QPDGQMPSDK TVGGGDDAFN  
 51 **TFFSETGAGK** HVPRAVFVDL **EPTVIDEVRT** **GTYRQLFHPE** **QLISGKEDAA**  
 101 **NNFARGHYTI** **GKEIVDLCLD** **RIRKLADNCT** GLQGFLVFNA VGGGTGSGLG  
 151 SLLLERLSVD YGKSKLGFT VYSPQVSTS VVEPYNSVLS THSLEHTDV  
 201 SILLDNEAIY DICRR**SLSIE** **RPTYTNLNL** VSQVISSLTA SLRFDGALNV  
 251 DVTEFQTNLV PYPRIHFMLS SYAPVISA EK AFHEQLSVAE ITNSAFEPAS  
 301 MMAKCDPRHG KYMACCLMYR GDVVPKDVNA AVGTIKTKRT IQFVDWCPTG  
 351 FKCGINYQPP TVVPGDLAK **VQRAVCMISN** **STSVAEVFSR** IDHK**FDL**MYA  
 401 **KRAVHWYVVG** **EGMEEGEFSE** **AREDLAALEK** DYEEVGAEGG DDEDEGE EY  
 451

Matched peptides information:

| Start - End | Observed  | Mr (expt) | Mr (calc) | ppm | Miss | Sequence                               |
|-------------|-----------|-----------|-----------|-----|------|----------------------------------------|
| 41 - 60     | 1977.9300 | 1976.9227 | 1976.8752 | 24  | 0    | K.TVGGDDAFNT <b>TFFSETGAGK</b> .H      |
| 65 - 79     | 1701.9674 | 1700.9601 | 1700.8985 | 36  | 0    | R.AVFVDLE <b>P</b> TVIDEVR.T           |
| 80 - 84     | 597.3727  | 596.3655  | 596.2918  | 123 | 0    | R.TGTYR.Q                              |
| 85 - 96     | 1396.7665 | 1395.7592 | 1395.7510 | 6   | 0    | R.QLFHPEQLISGK.E                       |
| 97 - 105    | 1007.5230 | 1006.5157 | 1006.4468 | 68  | 0    | K.EDAANNFAR.G                          |
| 113 - 121   | 1132.6111 | 1131.6038 | 1131.5594 | 39  | 0    | K.EIVDLCLDR.I                          |
| 216 - 229   | 1663.9185 | 1662.9112 | 1662.8689 | 25  | 0    | R.SLSIERPTYTNLNR.L                     |
| 374 - 390   | 1873.9314 | 1872.9241 | 1872.8710 | 28  | 0    | R.AVCMISNSTSVAEVFSR.I Oxidation (M)    |
| 395 - 401   | 903.5040  | 902.4967  | 902.4208  | 84  | 0    | K.FDL <b>MYAK</b> .R Oxidation (M)     |
| 403 - 422   | 2330.0971 | 2329.0898 | 2329.0110 | 34  | 0    | R.AVHWYVVGEGMEEGEFSEAR.E               |
| 403 - 422   | 2346.0676 | 2345.0603 | 2345.0059 | 23  | 0    | R.AVHWYVVGEGMEEGEFSEAR.E Oxidation (M) |

Spot No.: **73**

Mascot score: **82**    Sequence coverage %: **15**

NCBI accession No.: **gi| 110738696**

Matched peptides No.: **11**

Total peptides No.: **27**

Calculated Mr: **71308**

Calculated pI: **6.47**

### Annotated PMF spectra:

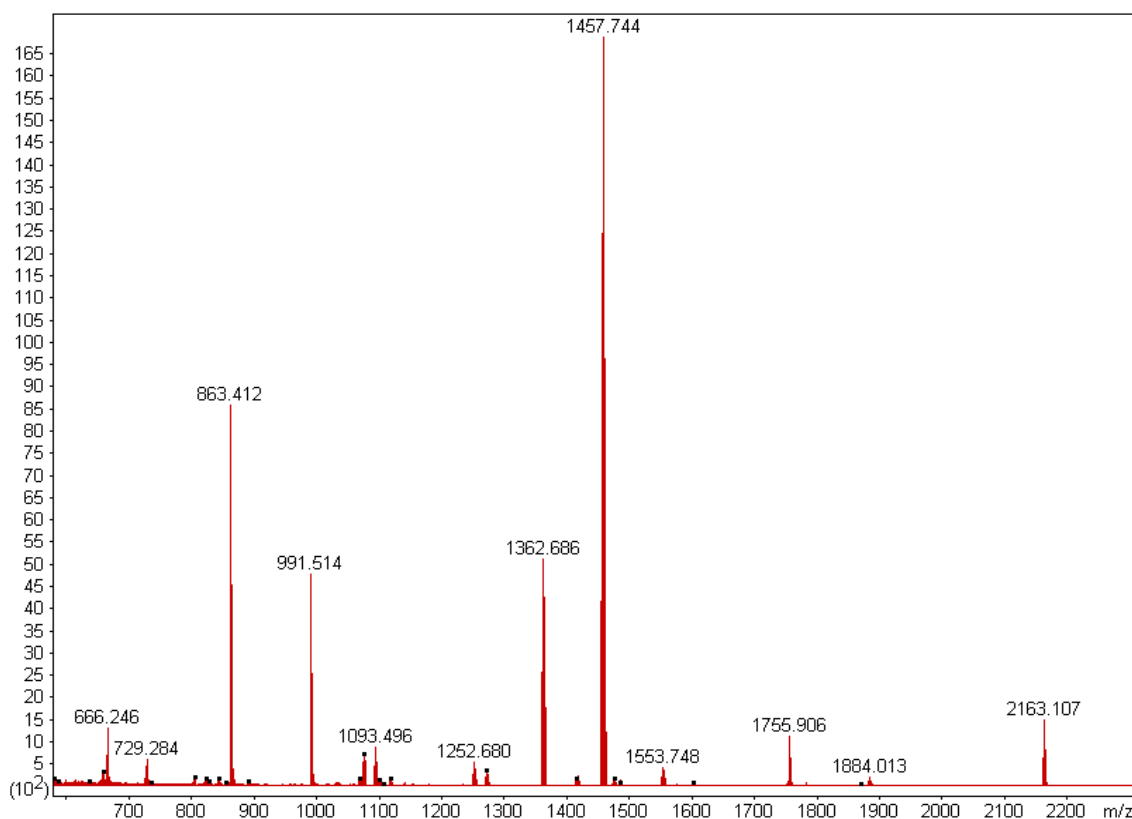

### Probability Based Mowse Score:

Protein score is  $-10 \cdot \log(P)$ , where P is the probability that the observed match is a random event. Protein scores greater than 72 are significant ( $p < 0.05$ ).

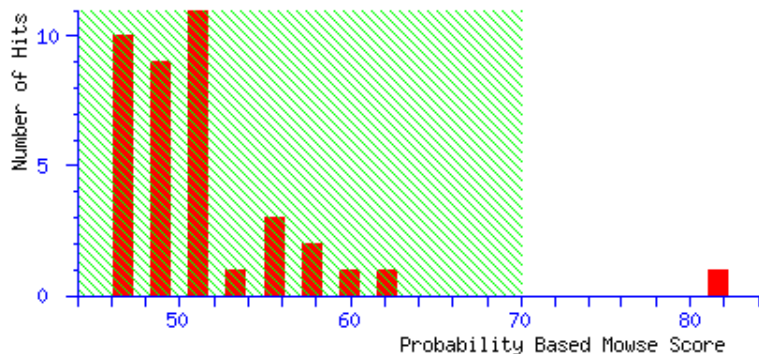

Matched peptide sequences: shown in **Bold Red**

```

1 MSKLETAAVK AISEVEDAAT QTKRAKKGKC LAPNEFIEEG GEKLRSIICC
51 IMGHVDSGKT KLLDCIRGTM VQEGEAGGIT QQIGATYFPA KNIRERTREL
101 KADAKLKVPG LLVIDTPGHE SFTNLRSRGS SLCDLAILVW DITHGLQPQT
151 IESLNLLRMR NTEFIIALNK VDRLYGWKTC KNAPIVKAMK QQNKDVINEF
201 NLRLKKIINE FQEQGLNTEL YYKNKDMGET FSIVPTS AIS GEGVPDLLLW
251 LVQWAQKTMV EKLTYVDEVQ CTVLEVKVIE GHGTTIDVVL VNGELHEGDQ
301 IVVCGLQGP I VTTIRALLTP HPMKELRVKG TYLHHKEIKA AOGIKITAQG
351 LEHAIAGTSL HVVGPDDDDIE AMKESAMEDM ESVLSRIDKS GEGVYVQTST
401 LGSLEALLEF LKTPAVNIPV SGIGIGPVHK KDIMKAGVML EKKEYATIL
451 AFDVKVTTEA RELADEMGVK IFCADIIYQL FNQFQVYIEN IKEEKKKESA
501 GEAVFPCVLQ ILPNCVFNKR DPIILGVKVH DGILKIGTPI CVPGREFTDI
551 GRIASIENMH KPVDYAEKGD EVAIKIVASH REEQKMFGRH FDMEDELVSH
601 ISRRSIDILK ADYMKEMSTE KWKLLLLKLR IFKIP

```

Matched peptides information:

| Start - End      | Observed         | Mr(expt)         | Mr(calc)         | ppm         | Miss     | Sequence                                                                                     |
|------------------|------------------|------------------|------------------|-------------|----------|----------------------------------------------------------------------------------------------|
| <b>1 - 10</b>    | <b>1093.4962</b> | <b>1092.4889</b> | <b>1092.5849</b> | <b>-88</b>  | <b>1</b> | <b>-.MSKLETA<b>AVK</b>.A</b> Oxidation (M)                                                   |
| <b>11 - 23</b>   | <b>1362.6864</b> | <b>1361.6791</b> | <b>1361.6674</b> | <b>9</b>    | <b>0</b> | <b>K.AISEVED<b>AA</b>T<b>Q</b>T<b>K</b>.R</b>                                                |
| <b>174 - 178</b> | <b>666.2461</b>  | <b>665.2388</b>  | <b>665.3537</b>  | <b>-173</b> | <b>0</b> | <b>R.LY<b>G</b>W<b>K</b>.T</b>                                                               |
| <b>188 - 194</b> | <b>863.4120</b>  | <b>862.4047</b>  | <b>862.4331</b>  | <b>-33</b>  | <b>1</b> | <b>K.A<b>M</b>K<b>Q</b>N<b>K</b>.D</b> Oxidation (M)                                         |
| <b>195 - 203</b> | <b>1119.6192</b> | <b>1118.6119</b> | <b>1118.5720</b> | <b>36</b>   | <b>0</b> | <b>K.D<b>V</b>I<b>N</b>E<b>F</b>N<b>L</b>R.L</b>                                             |
| <b>413 - 430</b> | <b>1755.9061</b> | <b>1754.8988</b> | <b>1755.0043</b> | <b>-60</b>  | <b>0</b> | <b>K.T<b>P</b>A<b>V</b>N<b>I</b>P<b>V</b>S<b>G</b>I<b>G</b>I<b>G</b>P<b>V</b>H<b>K</b>.K</b> |
| <b>413 - 431</b> | <b>1884.0127</b> | <b>1883.0054</b> | <b>1883.0993</b> | <b>-50</b>  | <b>1</b> | <b>K.T<b>P</b>A<b>V</b>N<b>I</b>P<b>V</b>S<b>G</b>I<b>G</b>I<b>G</b>P<b>V</b>H<b>K</b>.D</b> |
| <b>436 - 443</b> | <b>891.4351</b>  | <b>890.4278</b>  | <b>890.4895</b>  | <b>-69</b>  | <b>1</b> | <b>K.A<b>G</b>V<b>M</b>L<b>E</b>K<b>K</b>.K</b> Oxidation (M)                                |
| <b>462 - 470</b> | <b>991.5141</b>  | <b>990.5068</b>  | <b>990.4692</b>  | <b>38</b>   | <b>0</b> | <b>R.E<b>L</b>A<b>D</b>E<b>M</b>G<b>V</b>K.I</b>                                             |
| <b>536 - 545</b> | <b>1069.4869</b> | <b>1068.4796</b> | <b>1068.5750</b> | <b>-89</b>  | <b>0</b> | <b>K.I<b>G</b>T<b>P</b>I<b>C</b>V<b>P</b>G<b>R</b>.E</b>                                     |
| <b>576 - 581</b> | <b>659.2958</b>  | <b>658.2885</b>  | <b>658.3762</b>  | <b>-133</b> | <b>0</b> | <b>K.I<b>V</b>A<b>S</b>N<b>R</b>.E</b>                                                       |

Spot No.: **74**

Mascot score: **170** Sequence coverage %: **32**

NCBI accession No.: **gi| 2493132**

Matched peptides No.: **17**

Total peptides No.: **31**

Calculated Mr: **53806**

Calculated pI: **5.12**

### Annotated PMF spectra:

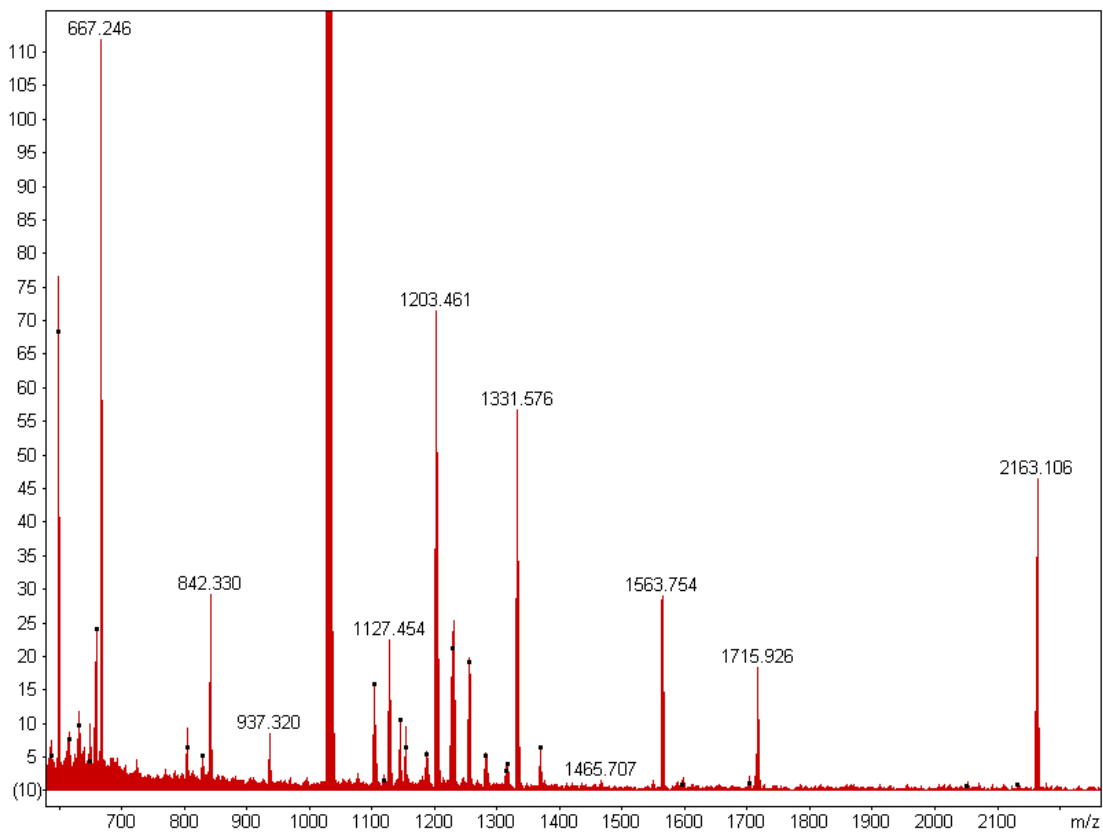

### Probability Based Mowse Score:

Protein score is  $-10 \cdot \log(P)$ , where P is the probability that the observed match is a random event. Protein scores greater than 72 are significant ( $p < 0.05$ ).

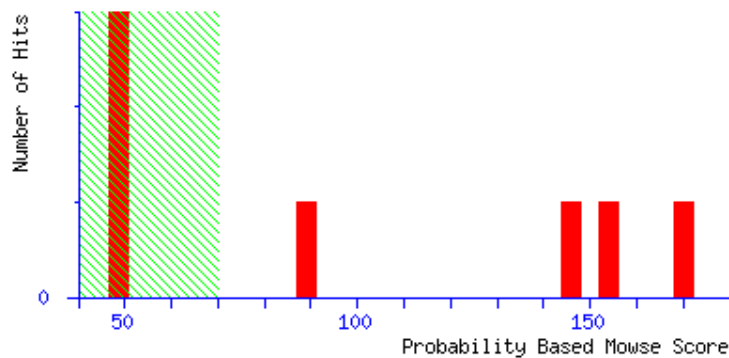

Matched peptide sequences: shown in **Bold Red**

```

1  MAPEMEEGTL EIGMEYRTVS GVAGPLVILD KVKGPKYQEI VNIRLGDGTT
51 RRGQVLEVDG EKAVVQVFEG TSGIDNKYTT VQFTGEVLKT PVSLDMLGRI
101 FNGSGKPIDN GPPILPEAYL DISGSSINPS ERTYPEEMIQ TGISTIDVMN
151 SIARGQKIPL FSAAGLPHNE IAAQICRQAG LVKRLEQSKH AAEGGEEDNF
201 AIVFAAMGVN METAQFFKRD FEENGSMERV TLFLNLANDP TIERIITPRI
251 ALTTAEYLAY ECGKHVLVIL TDMSSYADAL REVSAAREEV PGRRGYPGYM
301 YTDLATIIYER AGRIEGRKGS ITQIPILTMP NDDITHPTPD LTGYITEGQI
351 YIDRQLHNRQ IYPPINVLPS LSRLMKSAIG EGMTRRDHSD VSNQLYANYA
401 IGKDVQAMKA VVGEEALSSE DLLYLEFLDK FERKFVAQGA YDTRNIFQSL
451 DLAWTLRIF PRELLHRIPA KTLDQFYSRD ATH

```

Matched peptides information:

| Start - End | Observed  | Mr(expt)  | Mr(calc)  | ppm  | Miss Sequence                                    |
|-------------|-----------|-----------|-----------|------|--------------------------------------------------|
| 37 - 44     | 1034.4811 | 1033.4738 | 1033.5556 | -79  | 0 K.YQ <b>EI</b> VNIR.L                          |
| 63 - 77     | 1563.7544 | 1562.7471 | 1562.7941 | -30  | 0 K.AVV <b>QVFE</b> GT <b>TSGIDNK</b> .Y         |
| 90 - 99     | 1104.4748 | 1103.4675 | 1103.5645 | -88  | 0 K.TPV <b>SLDMLGR</b> .I Oxidation (M)          |
| 219 - 229   | 1369.6825 | 1368.6752 | 1368.5728 | 75   | 1 K.R <b>DFEENG</b> SMER.V                       |
| 220 - 229   | 1229.5081 | 1228.5008 | 1228.4666 | 28   | 0 R. <b>DFEENG</b> SMER.V Oxidation (M)          |
| 230 - 244   | 1715.9261 | 1714.9188 | 1714.9254 | -4   | 0 R.V <b>TLFLNLAN</b> DP <b>TIER</b> .I          |
| 245 - 249   | 599.2486  | 598.2413  | 598.3802  | -232 | 0 R. <b>IITPR</b> .I                             |
| 250 - 264   | 1702.8528 | 1701.8455 | 1701.8283 | 10   | 0 R. <b>I</b> AL <b>TTAEYL</b> AY <b>ECGK</b> .H |
| 282 - 287   | 632.1809  | 631.1736  | 631.3289  | -246 | 0 R. <b>EVSAAR</b> .E                            |
| 288 - 294   | 842.3296  | 841.3223  | 841.4406  | -141 | 1 R. <b>EEVP</b> GRR.G                           |
| 355 - 359   | 667.2461  | 666.2388  | 666.3561  | -176 | 0 R. <b>QLHNR</b> .Q                             |
| 360 - 373   | 1596.8824 | 1595.8751 | 1595.9035 | -18  | 0 R. <b>QIYPPIN</b> VLP <b>SLSR</b> .L           |
| 377 - 385   | 937.3198  | 936.3125  | 936.4335  | -129 | 0 K. <b>SAIGEM</b> TR.R Oxidation (M)            |
| 386 - 403   | 2050.9949 | 2049.9876 | 2049.9868 | 0    | 1 R. <b>RDHSDVSNQLYANYA</b> IGK.D                |
| 434 - 444   | 1255.5724 | 1254.5651 | 1254.6357 | -56  | 1 R. <b>KFVAQ</b> GAYDTR.N                       |
| 435 - 444   | 1127.4541 | 1126.4468 | 1126.5407 | -83  | 0 K. <b>FVAQ</b> GAYDTR.N                        |
| 472 - 479   | 1029.4018 | 1028.3945 | 1028.4927 | -95  | 0 K. <b>TLDQF</b> YSR.D                          |

Spot No.: **75**

Mascot score: **109**    Sequence coverage %: **52**

NCBI accession No.: **gi| 7708185**

Matched peptides No.: **25**

Total peptides No.: **157**

Calculated Mr: **52907**

Calculated pI: **5.21**

### Annotated PMF spectra:

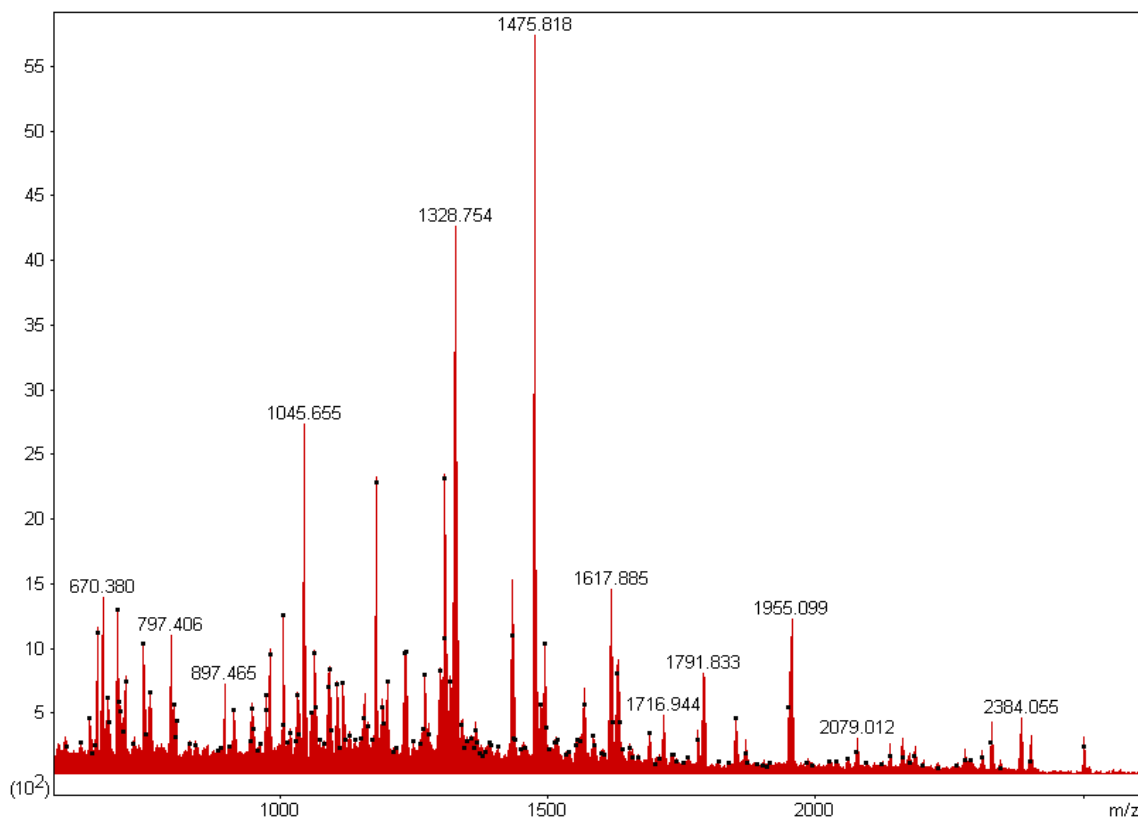

### Probability Based Mowse Score:

Protein score is  $-10 \cdot \log(P)$ , where P is the probability that the observed match is a random event. Protein scores greater than 72 are significant ( $p < 0.05$ ).

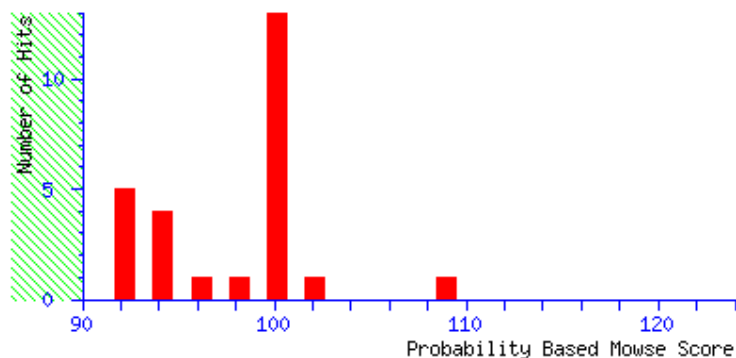

## Matched peptide sequences: shown in **Bold Red**

**1 DPGVSTLEK**K NLGR**IVQIIG PVL**DVA**FPPG KMPNIYNALV** VKGRD**TVGQQ**  
**51** INVTCEV**QQL** LGNNR**VRAVA MSATDGLRRG** MDVIDTGAAL SVPVGGATLG  
**101 RIFNVLGEPV** **DNLGPVDTRT** TSPIHR**SAPA FIQLD**TKLSI **FETGIKVVDL**  
**151 LAPYRRGGKI** **GLFGGAGVGK** **TVLIMELINN** IAKAHGGVSV **FGGVGERTRE**  
**201 GNDLYMEMKE** SGVINEQ**NI**A ESK**VALVYGQ MNEPPGAR**MR VGLTALTMAE  
**251 YFRDVNEQDV** **LLFIDNIFRF** **VQAGSEVSAL** **LGRMPSAVGY** **QPTLSTEMGT**  
**301 LQERITSTKE** GSITSIQAVY VPADDLTDPA PATTFAHLDA TTVLSR**GLAA**  
**351 KGIYPAVDPL** **DSTSTMLQPR** IVGEEHYETA QRVK**QTLQR**Y KELQDIIAIL  
**401** GLDELSEEDR LTVARARKIE RFLSQPFVA EVFTGSPGKY VGLAETIRGF  
**451** QLILSGELDG LPEQAFYLVG NIDEATA**KAM NLEMESNLKK**

## Matched peptides information:

| Start - End | Observed  | Mr(expt)  | Mr(calc)  | ppm | Miss | Sequence                                  |
|-------------|-----------|-----------|-----------|-----|------|-------------------------------------------|
| 1 - 9       | 945.5447  | 944.5375  | 944.4815  | 59  | 0    | -.DPGVSTLEK.K                             |
| 15 - 31     | 1763.0201 | 1762.0128 | 1762.0393 | -15 | 0    | R.IVQIIGPVLDAFPPGK.M                      |
| 32 - 42     | 1277.7074 | 1276.7001 | 1276.6849 | 12  | 0    | K.MPNIYNALVVK.G Oxidation (M)             |
| 68 - 78     | 1107.5975 | 1106.5902 | 1106.5390 | 46  | 0    | R.AVAMSATDGLR.R Oxidation (M)             |
| 102 - 119   | 1955.0991 | 1954.0918 | 1954.0160 | 39  | 0    | R.IFNVLGEPVDNLGPVDTR.T                    |
| 127 - 137   | 1190.6719 | 1189.6646 | 1189.6343 | 26  | 0    | R.SAPAFIQLDTK.L                           |
| 138 - 146   | 1007.5959 | 1006.5886 | 1006.5699 | 19  | 0    | K.LSIFETGIK.V                             |
| 147 - 155   | 1045.6550 | 1044.6477 | 1044.5968 | 49  | 0    | K.VVDLLAPYR.R                             |
| 147 - 156   | 1201.7316 | 1200.7243 | 1200.6979 | 22  | 1    | K.VVDLLAPYRR.G                            |
| 157 - 170   | 1217.6770 | 1216.6697 | 1216.6928 | -19 | 1    | R.GGKIGLFGGAGVGK.T                        |
| 160 - 170   | 975.5933  | 974.5860  | 974.5549  | 32  | 0    | K.IGLFGGAGVGK.T                           |
| 171 - 183   | 1487.8371 | 1486.8298 | 1486.8429 | -9  | 0    | K.TVLIMELINNIK.A Oxidation (M)            |
| 184 - 197   | 1328.7538 | 1327.7465 | 1327.6633 | 63  | 0    | K.AHGGVSVFGVGER.T                         |
| 198 - 209   | 1518.7923 | 1517.7850 | 1517.6490 | 90  | 1    | R.TREGNDLYMEMK.E 2 Oxidation (M)          |
| 224 - 238   | 1601.8531 | 1600.8458 | 1600.8031 | 27  | 0    | K.VALVYQMNNEPPGAR.M                       |
| 224 - 238   | 1617.8847 | 1616.8774 | 1616.7981 | 49  | 0    | K.VALVYQMNNEPPGAR.M Oxidation (M)         |
| 254 - 269   | 1950.0526 | 1949.0453 | 1948.9894 | 29  | 0    | R.DVNEQDVLLFIDNIFR.F                      |
| 270 - 283   | 1433.8371 | 1432.8298 | 1432.7674 | 44  | 0    | R.FVQAGSEVSALLGR.M                        |
| 284 - 304   | 2328.1795 | 2327.1722 | 2327.0773 | 41  | 0    | R.MPSAVGYQPTLSTEMGTLQER.I 2 Oxidation (M) |
| 347 - 370   | 2501.3058 | 2500.2985 | 2500.2995 | -0  | 1    | R.GLAAKGIYPAVDPLDSTSTMLQPR.I              |
| 352 - 370   | 2061.0818 | 2060.0745 | 2060.0248 | 24  | 0    | K.GIYPAVDPLDSTSTMLQPR.I                   |
| 352 - 370   | 2077.0899 | 2076.0826 | 2076.0198 | 30  | 0    | K.GIYPAVDPLDSTSTMLQPR.I Oxidation (M)     |
| 385 - 389   | 645.4026  | 644.3954  | 644.3606  | 54  | 0    | K.QLQR.Y                                  |
| 479 - 490   | 1407.7605 | 1406.7532 | 1406.6897 | 45  | 1    | K.AMNLEMESNLKK.-                          |
| 479 - 490   | 1439.7727 | 1438.7654 | 1438.6796 | 60  | 1    | K.AMNLEMESNLKK.- 2 Oxidation (M)          |

Spot No.: **76**

Mascot score: **81**    Sequence coverage %: **12**

NCBI accession No.: **gi| 22328910**

Matched peptides No.: **10**

Total peptides No.: **22**

Calculated Mr: **54154**

Calculated pI: **6.25**

### Annotated PMF spectra:

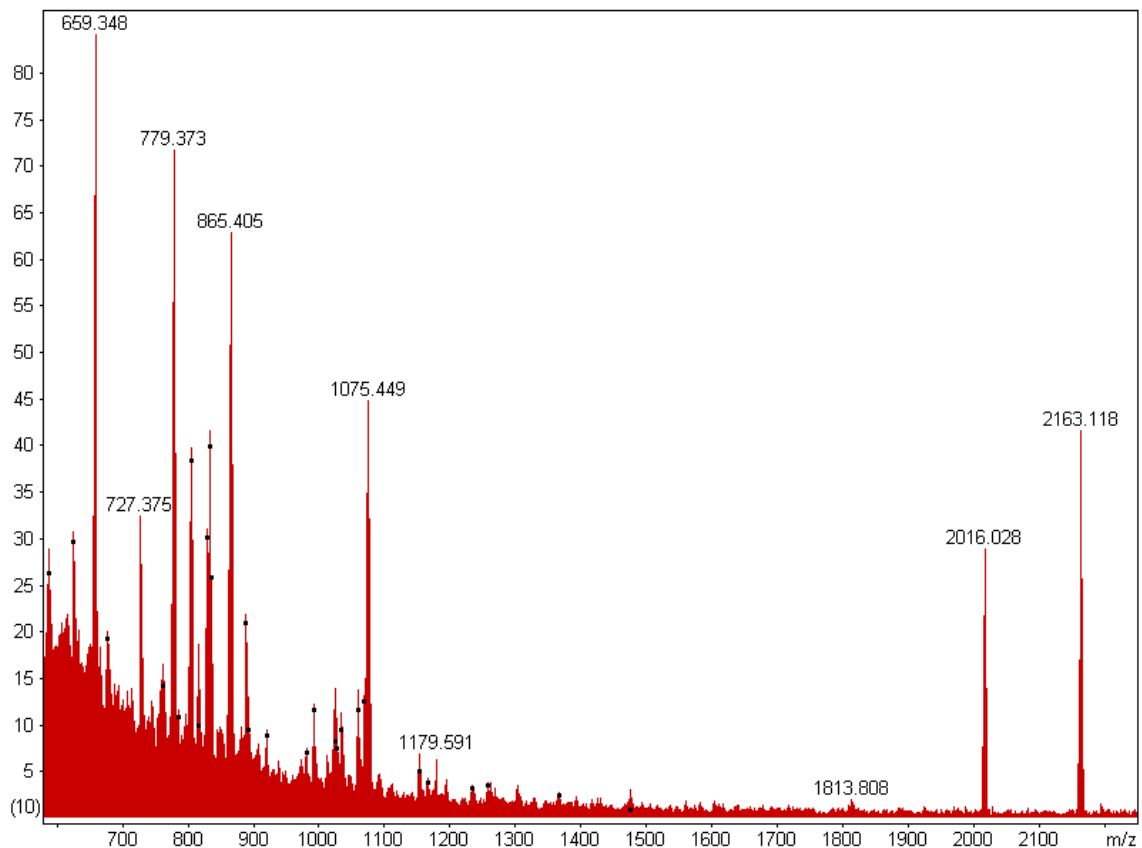

### Probability Based Mowse Score:

Protein score is  $-10 \cdot \log(P)$ , where P is the probability that the observed match is a random event. Protein scores greater than 72 are significant ( $p < 0.05$ ).

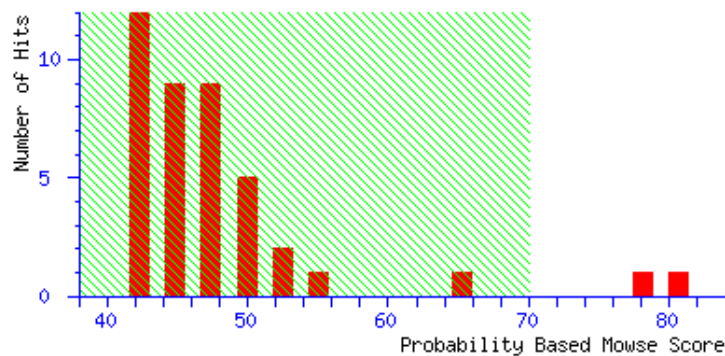



Matched peptide sequences: shown in **Bold Red**

```

1 MAEISATSFP SSSSSALVIR SSHNGSLKCQ NVAVPKTTSQ FQELSLKRSQ
51 LVGNNAVVTGH VTGSRACKNQ AIRAVLSGDG TALTTDSKEA GLRGKLLKVV
101 LAYSGGLDTS VIVPWLEKENV GCEVVCFTAD VGQGIKELEG LEQKAKASGA
151 SQLVVKDLTE EFVKDFIFPC LRAGAIYERK YLLGTSMARP VIAKAMVDVA
201 AEVGADAVAH GCTGKGNQV RFELTFFSLN PELKVVAPWR EWEIQGREDA
251 IEYAKKHNVP VPVTKKSIYS RDRNLWHLSE EGDLLDPAN EPKKDMYMS
301 VDPEDAPDQP EYIEIGIESG LPVALNGKAL SPATLLAELN TIGGKHGIGR
351 IDMVENRLVG MKSRGVYETP GGTILFAAVQ ELESRLDRE SIQVKDTLAL
401 KYAEMVYAGR WFDPLRESMD AFMEKITETT TGSVTLKLYK GSVSVTGRQS
451 PNSLYRQDIS SFEGSEIYNQ ADAAGFIRLY GLPMKIRAML KKIS

```

Matched peptides information:

| Start - End | Observed  | Mr(expt)  | Mr(calc)  | ppm  | Miss | Sequence                    |
|-------------|-----------|-----------|-----------|------|------|-----------------------------|
| 21 - 28     | 829.2838  | 828.2765  | 828.4090  | -160 | 0    | R.SSHNGSLK.C                |
| 157 - 164   | 980.4511  | 979.4439  | 979.4862  | -43  | 0    | K.DLTEEFVK.D                |
| 173 - 179   | 779.3732  | 778.3660  | 778.3973  | -40  | 0    | R.AGAIYER.K                 |
| 235 - 240   | 727.3751  | 726.3679  | 726.4177  | -69  | 0    | K.VVAPWR.E                  |
| 267 - 271   | 625.2654  | 624.2582  | 624.3231  | -104 | 0    | K.SIYSR.D                   |
| 351 - 357   | 892.3813  | 891.3740  | 891.4120  | -43  | 0    | R.IDMVENR.L Oxidation (M)   |
| 402 - 410   | 1059.4817 | 1058.4744 | 1058.4855 | -10  | 0    | K.YAEMVYAGR.W               |
| 402 - 410   | 1075.4495 | 1074.4422 | 1074.4804 | -36  | 0    | K.YAEMVYAGR.W Oxidation (M) |
| 411 - 416   | 833.3919  | 832.3846  | 832.4232  | -46  | 0    | R.WFDPLR.E                  |
| 441 - 448   | 762.3714  | 761.3641  | 761.4032  | -51  | 0    | K.GSVSVTGR.Q                |

Spot No.: **77**

Mascot score: **94** Sequence coverage %: **21**

NCBI accession No.: **gi| 15218090**

Matched peptides No.: **15**

Total peptides No.: **45**

Calculated Mr: **54539**

Calculated pI: **5.94**

### Annotated PMF spectra:

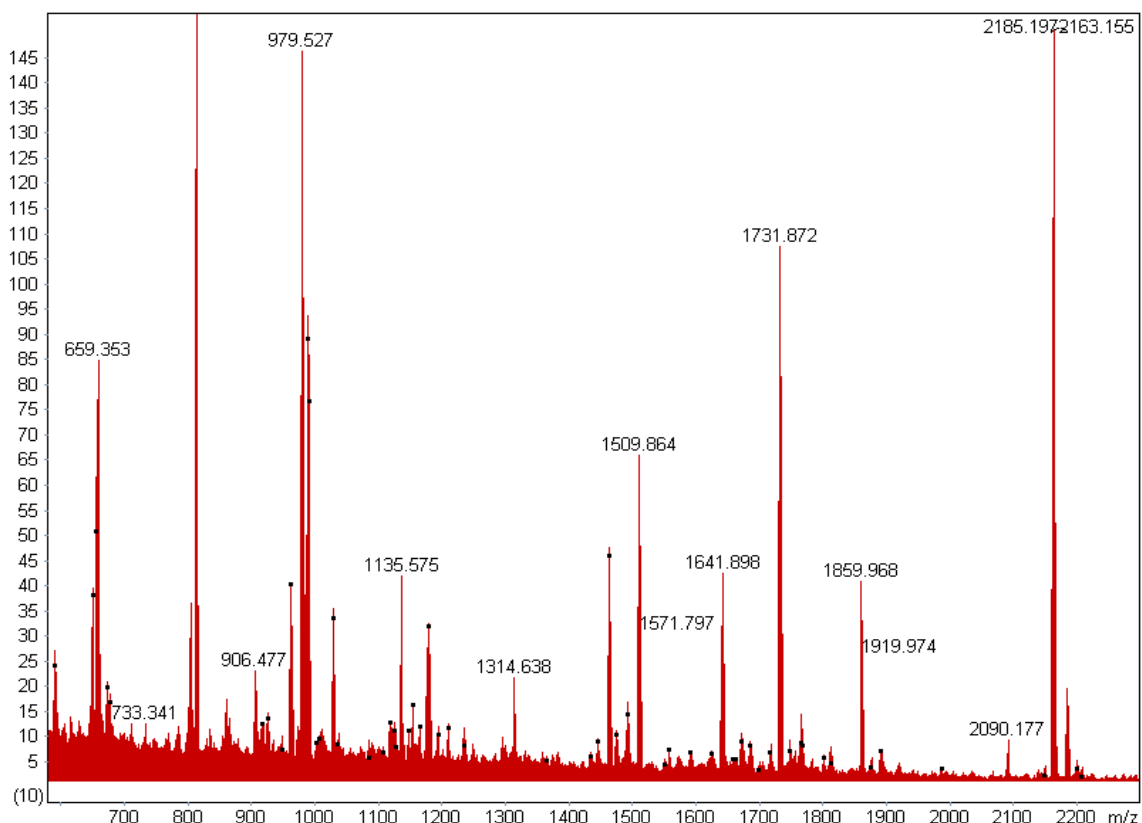

### Probability Based Mowse Score:

Protein score is  $-10 \cdot \log(P)$ , where P is the probability that the observed match is a random event. Protein scores greater than 72 are significant ( $p < 0.05$ ).

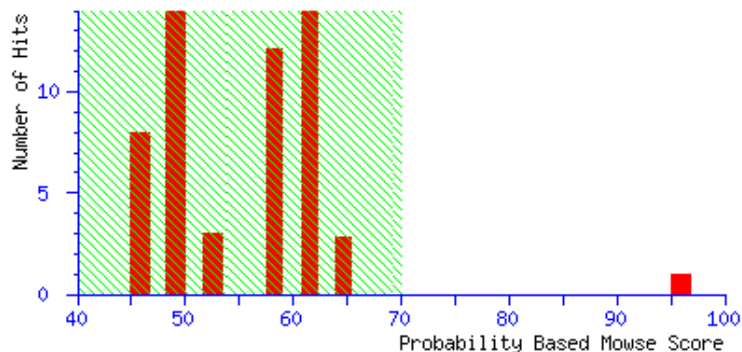

Matched peptide sequences: shown in **Bold Red**

**1** MYRTAASRAR ALKGVLTRSL RPARYASSSA VAETSSSTPA YLSWLSGGSR  
**51** AALTSLDMPL QGVSLPPPLA DKVEPSKLQI TTLPMGLKIA SETTPNPAAAS  
**101** IGLYVDCGSI YEAPYFHGAT HLLERMAFKS **TLNR**THFRLV **REIEAIGGNT**  
**151** **SASASREQMS** **YTIDALKTYV** PEMVEVLIDS **VRNPAFLDWE** **VNEELRKMKV**  
**201** **EIAELAKNPM** GFLLEAIHSA GYSGPLASPL YAPESALDRL NGELLEEFMT  
**251** ENFTAARMVL **AASGVEHEEL** **LKVAEPLTSD** LPNVPPQLAP **KSQYVGGDFR**  
**301** QHTGGEATHF AVAFEVPGWN NEKEAVTATV LQMLMGGGGS FSAGGPGKGM  
**351** HSWLYRRVLN EYQEVQSCTA FTSIFNDTGL FGIYGCSSPQ FAAKAIELAA  
**401** KELKDVAGGK VNQAHLDRAK AATK**SAVLMN** **LESRMIAAED** **IGRQILTYGE**  
**451** **RKPVDQFLKS** VDQLTLKDIA DFTSKVISKP LTMGSFGDVL AVPSYDTISS  
**501** KFR

Matched peptides information:

| Start - End | Observed  | Mr(expt)  | Mr(calc)  | ppm | Miss Sequence                      |
|-------------|-----------|-----------|-----------|-----|------------------------------------|
| 130 - 134   | 590.2720  | 589.2647  | 589.3184  | -91 | 0 K.STLNR.T                        |
| 142 - 156   | 1462.7445 | 1461.7372 | 1461.7059 | 21  | 0 R.EIEAIGGNTSASASR.E              |
| 157 - 167   | 1314.6385 | 1313.6312 | 1313.6173 | 11  | 0 R.EQMSYTTIDALK.T Oxidation (M)   |
| 183 - 196   | 1731.8719 | 1730.8646 | 1730.8264 | 22  | 0 R.NPAFLDWEVNEELR.K               |
| 183 - 197   | 1859.9684 | 1858.9611 | 1858.9213 | 21  | 1 R.NPAFLDWEVNEELR.M               |
| 198 - 207   | 1147.6213 | 1146.6140 | 1146.6318 | -16 | 1 K.MKVEIAELAK.N Oxidation (M)     |
| 258 - 272   | 1625.8654 | 1624.8581 | 1624.8494 | 5   | 0 R.MVLAASGVEHEELK.V               |
| 258 - 272   | 1641.8976 | 1640.8903 | 1640.8443 | 28  | 0 R.MVLAASGVEHEELK.V Oxidation (M) |
| 292 - 300   | 1028.5154 | 1027.5081 | 1027.4723 | 35  | 0 K.SQYVGGDFR.Q                    |
| 425 - 434   | 1119.5605 | 1118.5532 | 1118.5754 | -20 | 0 K.SAVLMNLESR.M                   |
| 425 - 434   | 1135.5746 | 1134.5673 | 1134.5703 | -3  | 0 K.SAVLMNLESR.M Oxidation (M)     |
| 435 - 443   | 991.4978  | 990.4906  | 990.4804  | 10  | 0 R.MIAAEDIGR.Q Oxidation (M)      |
| 444 - 451   | 979.5271  | 978.5198  | 978.5134  | 7   | 0 R.QILTYGER.K                     |

Spot No.: **78**

Mascot score: **86** Sequence coverage %: **54**

NCBI accession No.: **gi| 19769**

Matched peptides No.: **15**

Total peptides No.: **112**

Calculated Mr: **25251**

Calculated pI: **9.78**

### Annotated PMF spectra:

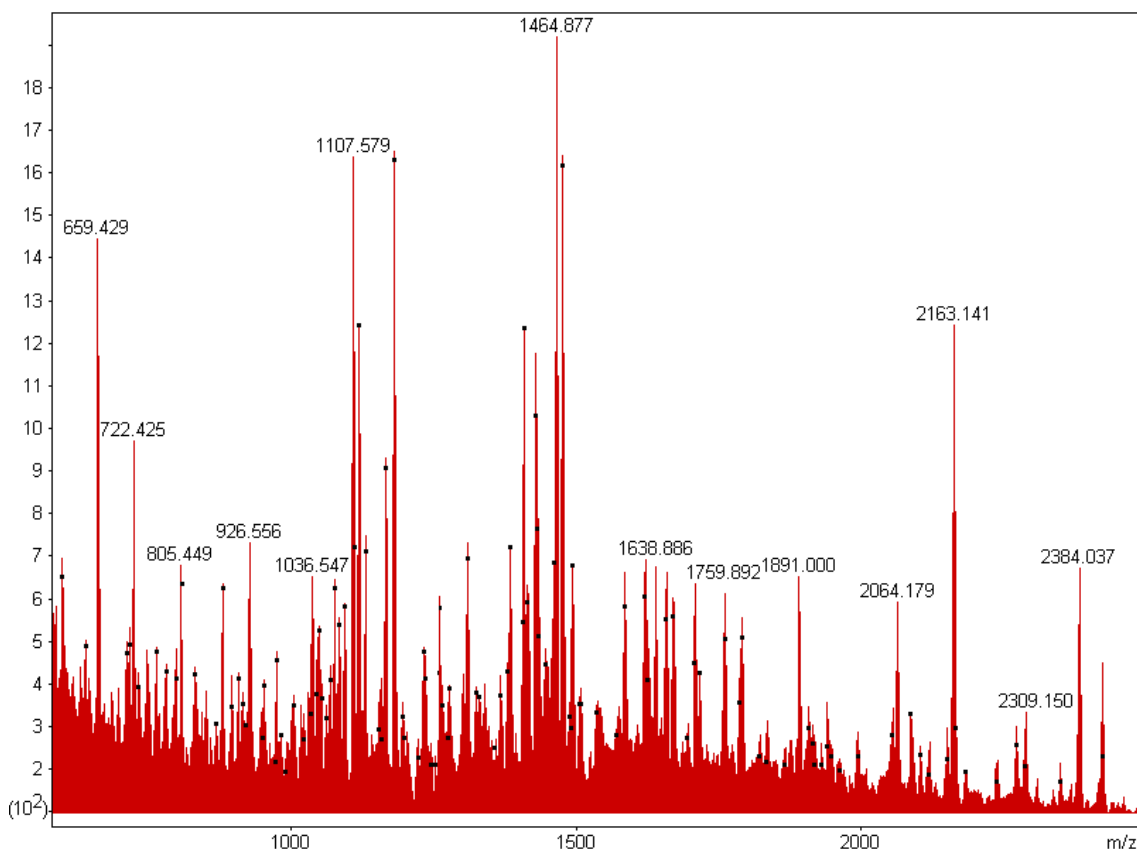

### Probability Based Mowse Score:

Protein score is  $-10 \cdot \log(P)$ , where P is the probability that the observed match is a random event. Protein scores greater than 72 are significant ( $p < 0.05$ ).

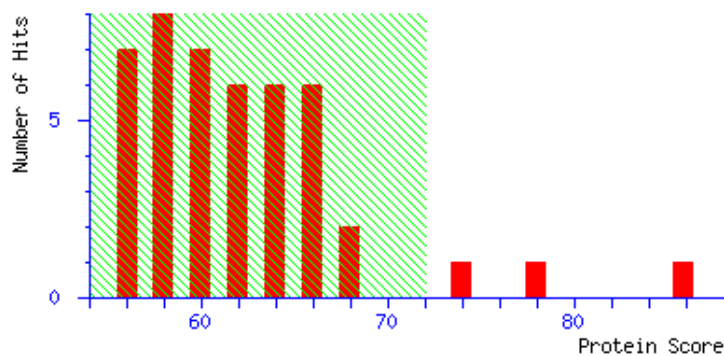

Matched peptide sequences: shown in **Bold Red**

1 **SNK**KDPSPAS**** **KTARKGRPLD** DAWQHATPVD GKKQRTICKY CGFVSSSGGI  
 51 **TYLK**THLGGG**** **DPTGSLK**GCP**** **NVPPEVKRVM** **TEWLQGTIRG** VNAPQLEDIR  
 101 **TDMEARTSKK** **SVRRGRPLDA** **AWEHATPVDA** **KRQRAVCKYC** GFISSSGGIT  
 151 **HLKAHLAGGD** **PKGPSK**GCPN**** **VPPEVRRVMA** **ESLNRTVKGV** **KAMQPEEIRR**  
 201 FMKAENDWSP PKSDDYSLNQ HRIVKNE

Matched peptides information:

| Start - End | Observed  | Mr (expt) | Mr (calc) | ppm | Miss | Sequence                       |
|-------------|-----------|-----------|-----------|-----|------|--------------------------------|
| 4 - 11      | 829.3884  | 828.3811  | 828.4341  | -64 | 1    | K.KDPSPASK.T                   |
| 40 - 54     | 1638.8859 | 1637.8786 | 1637.7760 | 63  | 0    | K.YCGFVSSSGGITYLK.T            |
| 68 - 78     | 1252.6371 | 1251.6298 | 1251.6394 | -8  | 1    | K.GCPNVPEVKR.V                 |
| 78 - 89     | 1505.7890 | 1504.7817 | 1504.7820 | -0  | 1    | K.RVMTEWLQGTIR.G Oxidation (M) |
| 90 - 106    | 1914.9500 | 1913.9427 | 1913.9265 | 8   | 1    | R.GVNAPQLEDIRTDMEAR.T          |
| 115 - 131   | 1833.9478 | 1832.9405 | 1832.9169 | 13  | 1    | R.GRPLDAAWEHATPVDAK.R          |
| 117 - 131   | 1620.8763 | 1619.8690 | 1619.7944 | 46  | 0    | R.PLDAAWEHATPVDAK.R            |
| 154 - 166   | 1234.6609 | 1233.6536 | 1233.6466 | 6   | 1    | K.AHLAGGDPKGPSK.G              |
| 163 - 176   | 1493.7802 | 1492.7729 | 1492.7457 | 18  | 1    | K.GPSKGCPCNVPEVVR.R            |
| 177 - 185   | 1075.6082 | 1074.6009 | 1074.5604 | 38  | 1    | R.RVMAESLNR.T                  |
| 178 - 185   | 919.4626  | 918.4553  | 918.4593  | -4  | 0    | R.VMAESLNR.T                   |
| 189 - 199   | 1273.6407 | 1272.6334 | 1272.6496 | -13 | 1    | K.GVKAMQPEEIR.R Oxidation (M)  |
| 192 - 199   | 973.5543  | 972.5471  | 972.4698  | 79  | 0    | K.AMQPEEIR.R                   |
| 192 - 199   | 989.5195  | 988.5122  | 988.4648  | 48  | 0    | K.AMQPEEIR.R Oxidation (M)     |
| 192 - 200   | 1129.6383 | 1128.6310 | 1128.5709 | 53  | 1    | K.AMQPEEIRR.F                  |

Spot No.: **79**

Mascot score: **81**    Sequence coverage %: **32**

NCBI accession No.: **gi| 308799665**

Matched peptides No.: **21**

Total peptides No.: **114**

Calculated Mr: **71166**

Calculated pI: **10.62**

### Annotated PMF spectra:

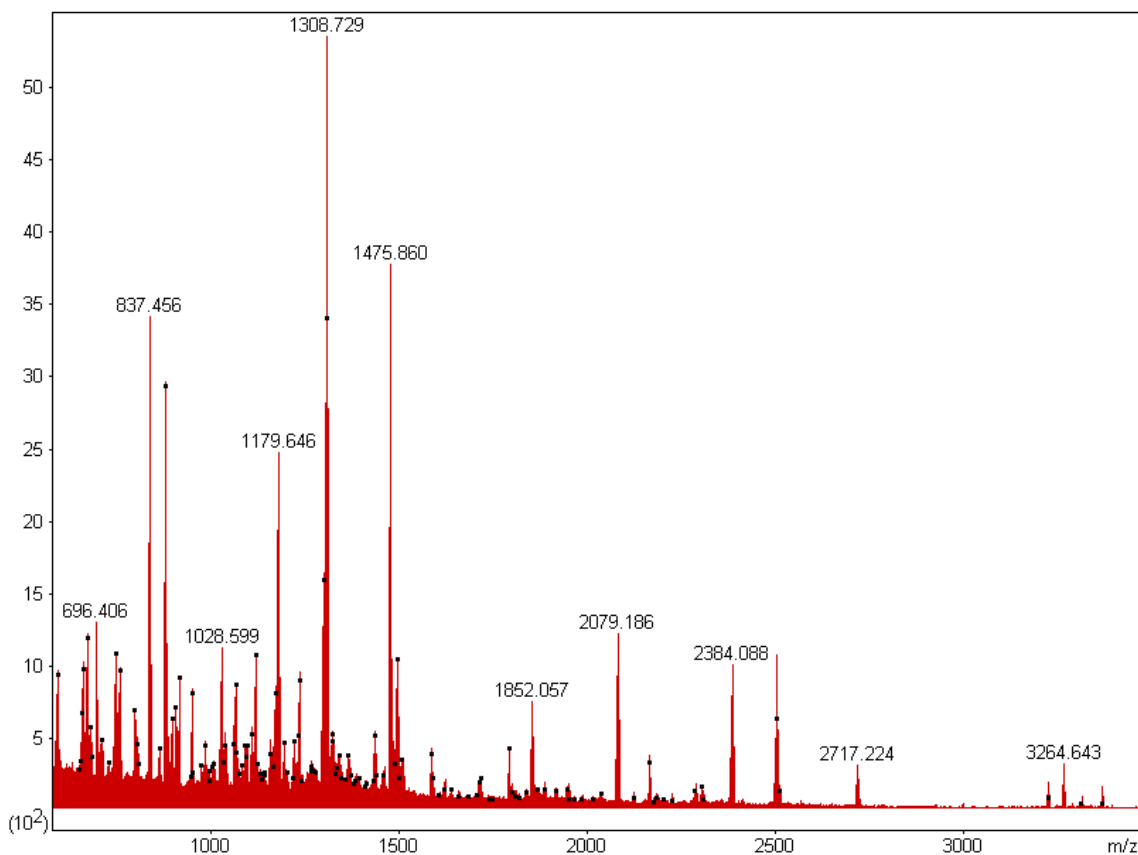

### Probability Based Mowse Score:

Protein score is  $-10 \cdot \log(P)$ , where P is the probability that the observed match is a random event. Protein scores greater than 72 are significant ( $p < 0.05$ ).

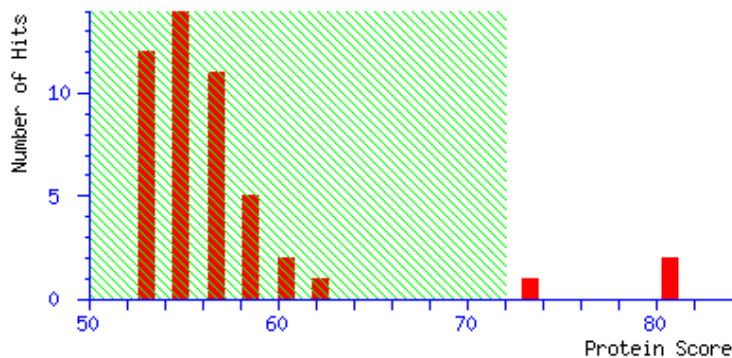

## Matched peptide sequences: shown in **Bold Red**

```

1 XHSVHTLTGF AHSVHTLTGF AHSVRTLTFG ARRVHTLTGF AHSVRTLTGF
51 VSRRVDGGRP RRRGGTPRAR RARTRRSDAA SRDAARGVVD ARDGDATWDR
101 GRTKRRRGAG TARTAATREE SGAVSGANDA DGNSDDSMEP IERKPFSVMR
151 WVTRTMLLG VVVRRLFAVV LVVCFSGALR VVGGIARNRF GRIGMMIGLA
201 LGAFGALRGV SARKMAAVKA APPTAMYSAF LKDLKAGRIS SVRFEEGSTR
251 LVDYDLKDVSA KSASASATAG RVRTTFQTKR LMGDLELMKK LEKAGVEFGA
301 VPAAVSRMAS RGMFTVLAMW LPIIPLIIIM RNAINRQQGG GGKKRKAAD
351 INEQNKVTFR DVAGVEDAKA ELFELVQIMK NSDKYKNVRG RLPSGCLLVG
401 PPGTGKTLLA RAVAGESGVS FFPVAASEFV ELFVGRGAAR VRELFAEARK
451 SQPAIIFIDE LDAVGSRRGA GLNEERDQTL NQLLVEMDGF SKDQSILILA
501 ATNRPDALDP ALLRPGRLTR RVFVGPPSQG GRAQILGVHL RGLDLEEDVD
551 VVCDVISRAT PGFTGAELAN VCNEAALLSV RDERQFVSID DLLDGVSRTK
601 DGIATSGNKA DAMFRELRSR FMGNYKDIPG SPGDVANGIK EKFGSKEKAQ
651 GVPISMGPS

```

## Matched peptides information:

| Start - End | Observed  | Mr (expt) | Mr (calc) | ppm | Miss | Sequence                                      |
|-------------|-----------|-----------|-----------|-----|------|-----------------------------------------------|
| 46 - 54     | 1036.5401 | 1035.5328 | 1035.5825 | -48 | 1    | R.TLTGFVSRR.V                                 |
| 145 - 155   | 1393.7775 | 1392.7702 | 1392.7336 | 26  | 1    | K.PFSVMRWVTR.T Oxidation (M)                  |
| 156 - 164   | 1003.5595 | 1002.5522 | 1002.5896 | -37 | 0    | R.TMLLGVVVR.R Oxidation (M)                   |
| 156 - 165   | 1143.5921 | 1142.5848 | 1142.6958 | -97 | 1    | R.TMLLGVVVR.L                                 |
| 193 - 208   | 1591.0104 | 1590.0031 | 1589.8786 | 78  | 0    | R.IGMMIGLALGAFGALR.G                          |
| 215 - 232   | 1868.0297 | 1867.0224 | 1866.9736 | 26  | 1    | K.MAAVKAAPPTAMYS <b>AF</b> LK.D               |
| 220 - 232   | 1383.7435 | 1382.7362 | 1382.6904 | 33  | 0    | K.AAPPTAMYS <b>AF</b> LK.D Oxidation (M)      |
| 233 - 238   | 659.3881  | 658.3808  | 658.3762  | 7   | 1    | K.DLKAGR.I                                    |
| 262 - 271   | 878.4961  | 877.4888  | 877.4253  | 72  | 0    | K.SASASATAGR.V                                |
| 281 - 289   | 1065.5437 | 1064.5364 | 1064.5246 | 11  | 0    | R.LMGDLELMK.K Oxidation (M)                   |
| 294 - 311   | 1791.8549 | 1790.8476 | 1790.9097 | -35 | 1    | K.AGVFVGAV <b>PA</b> AVSRMASR.G Oxidation (M) |
| 347 - 356   | 1130.5554 | 1129.5481 | 1129.5727 | -22 | 1    | K.KAADINEQNK.V                                |
| 370 - 380   | 1320.6845 | 1319.6772 | 1319.7159 | -29 | 0    | K.AELFELVQIMK.N                               |
| 385 - 389   | 679.3696  | 678.3623  | 678.3813  | -28 | 1    | K.YKNVR.G                                     |
| 441 - 449   | 1090.5648 | 1089.5575 | 1089.5931 | -33 | 1    | R.VRELFAEAR.K                                 |
| 477 - 492   | 1838.0674 | 1837.0601 | 1836.8928 | 91  | 0    | R.DQTLNQLLVEMDGF <b>SK</b> .D                 |
| 522 - 532   | 1171.6734 | 1170.6661 | 1170.6146 | 44  | 0    | R.VFVGP <b>PS</b> QGR.A                       |
| 533 - 541   | 1006.5229 | 1005.5156 | 1005.6083 | -92 | 0    | R.AQILGVHLR.G                                 |
| 601 - 609   | 862.4420  | 861.4347  | 861.4192  | 18  | 0    | K.DGIATSGNK.A                                 |
| 627 - 640   | 1339.6878 | 1338.6805 | 1338.6779 | 2   | 0    | K.DIPGS <b>PGD</b> VANGIK.E                   |
| 647 - 659   | 1300.6178 | 1299.6105 | 1299.6493 | -30 | 1    | K.EKAQ <b>GVPI</b> SMG <b>PS</b> .-           |

Spot No.: **80**

Mascot score: **203**    Sequence coverage %: **39**

NCBI accession No.: **gi| 157336951**

Matched peptides No.: **17**

Total peptides No.: **31**

Calculated Mr: **47196**

Calculated pI: **5.42**

### Annotated PMF spectra:

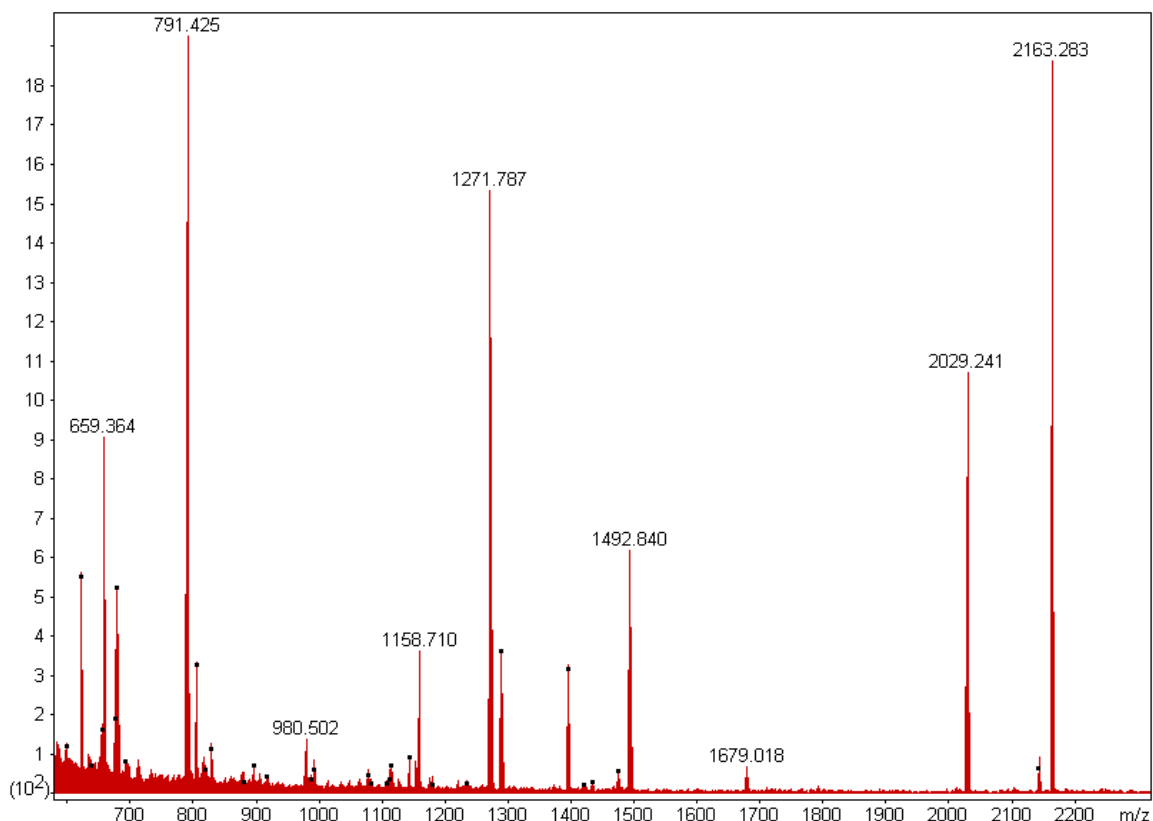

### Probability Based Mowse Score:

Protein score is  $-10 \cdot \log(P)$ , where P is the probability that the observed match is a random event. Protein scores greater than 72 are significant ( $p < 0.05$ ).

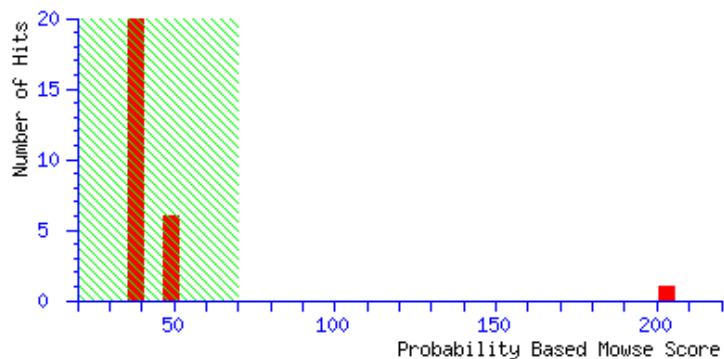



Matched peptide sequences: shown in **Bold Red**

**1** MAVVLEPKPS SEPPPSFPST RSDIQGFSQ SSSFSDEDDL YGRLKSLQRQ  
**51** LEFIDIQEEY VKDEQKNLKR ELLRAQEEVK RIQSVPLVIG QFMEMVDQNN  
**101** GIVGSTTGSN YYVRILSTIN **RELLKPSASV ALHRHSNALV** DVLPPPEADSS  
**151** ISLLSQSEKP DVTYNDIGGC DIQKQEIREA **VELPLTHHEL YKQIGIDPPR**  
**201** **GVLLYGPPGT GKTMLAKAVA NHTTAAFIRV VGSEFVQKYL GEGPRMVRDV**  
**251** FRLAKENAPA **IIFIDEVDAL ATARFDAQTG ADREVQRILM** ELLNQMDGFD  
**301** QTVNVKVIMA **TNRADTLDPAL LRPGRLLDRK IEFPLPDRRQ** KRLVFQVCTA  
**351** KMNLSDEVDL EDYVSRPDKI **SAAEIAAICQ EAGMHAVRKN** RYVILPKDFE  
**401** KGYRTNVKPK **DTDFEFYK**

Matched peptides information:

| Start - End | Observed  | Mr(expt)  | Mr(calc)  | ppm | Miss Sequence                           |
|-------------|-----------|-----------|-----------|-----|-----------------------------------------|
| 122 - 134   | 1420.9554 | 1419.9481 | 1419.8198 | 90  | 0 R.ELLKPSASVALHR.H                     |
| 179 - 192   | 1679.0177 | 1678.0104 | 1677.8726 | 82  | 0 R.EAVELPLTHHELYK.Q                    |
| 193 - 200   | 895.4890  | 894.4818  | 894.4923  | -12 | 0 K.QIGIDPPR.G                          |
| 201 - 212   | 1158.7103 | 1157.7030 | 1157.6445 | 51  | 0 R.GVLLYGPPGTGK.T                      |
| 218 - 229   | 1271.7867 | 1270.7794 | 1270.6782 | 80  | 0 K.AVANHTTAAFIR.V                      |
| 230 - 238   | 992.5735  | 991.5662  | 991.5339  | 33  | 0 R.VVGSEFVQK.Y                         |
| 239 - 245   | 791.4250  | 790.4177  | 790.3973  | 26  | 0 K.YLGEGPR.M                           |
| 256 - 274   | 2029.2409 | 2028.2336 | 2028.0527 | 89  | 0 K.ENAPAIIFIDEVDALATAR.F               |
| 275 - 283   | 980.5018  | 979.4945  | 979.4359  | 60  | 0 R.FDAQTGADR.E                         |
| 275 - 287   | 1492.8399 | 1491.8326 | 1491.7066 | 84  | 1 R.FDAQTGADREVQR.I                     |
| 307 - 313   | 820.4229  | 819.4156  | 819.4273  | -14 | 0 K.VIMATNR.A Oxidation (M)             |
| 314 - 326   | 1394.8818 | 1393.8745 | 1393.7677 | 77  | 0 R.ADTLDPALLRPGR.L                     |
| 330 - 338   | 1114.7099 | 1113.7026 | 1113.6182 | 76  | 1 R.KIEFPLPDR.R                         |
| 331 - 338   | 986.5401  | 985.5328  | 985.5233  | 10  | 0 K.IEFPLPDR.R                          |
| 331 - 339   | 1142.6831 | 1141.6758 | 1141.6244 | 45  | 1 K.IEFPLPDRR.Q                         |
| 370 - 389   | 2142.2002 | 2141.1929 | 2141.0721 | 56  | 1 K.ISAAEIAAICQEAGMHAVRKN Oxidation (M) |
| 409 - 418   | 1289.6973 | 1288.6900 | 1288.5976 | 72  | 0 K.KPDTDFEFYK.-                        |

Spot No.: **81**

Mascot score: **172**    Sequence coverage %: **43**

NCBI accession No.: **gi| 312281677**

Matched peptides No.: **26**

Total peptides No.: **73**

Calculated Mr: **57475**

Calculated pI: **6.24**

### Annotated PMF spectra:

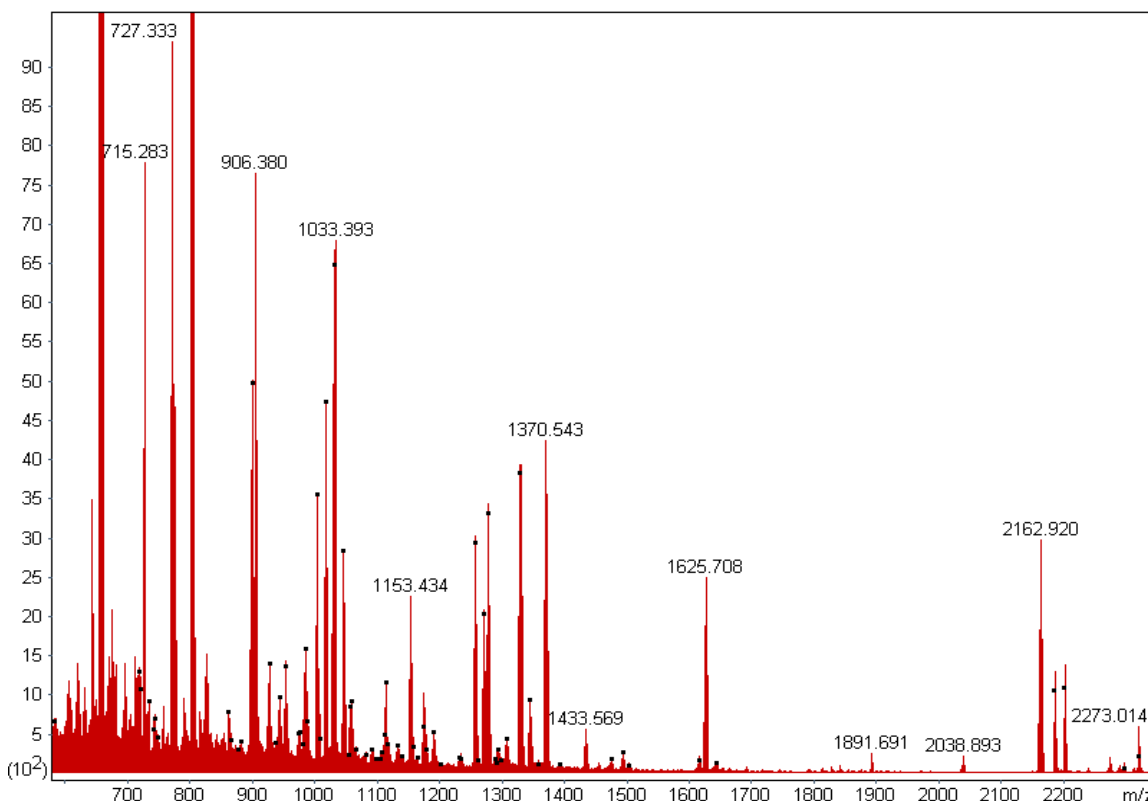

### Probability Based Mowse Score:

Protein score is  $-10 \cdot \log(P)$ , where P is the probability that the observed match is a random event. Protein scores greater than 72 are significant ( $p < 0.05$ ).

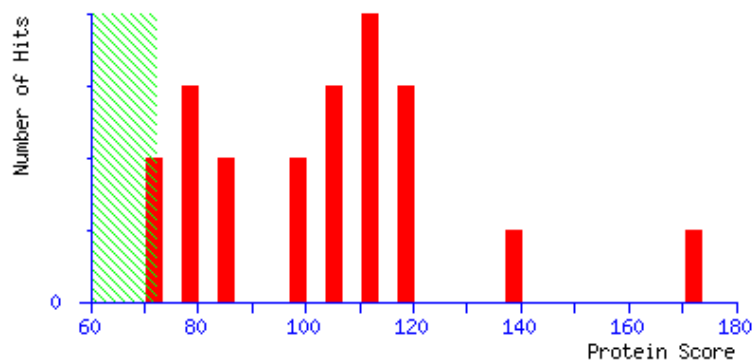

Matched peptide sequences: shown in **Bold Red**

```

1 MASMAAIGAL KVPAASCSDS TRIVTEAVPA RTLSFSSSVG LSDEKLSLRA
51 TVSRRESVA RGRVRNPMIV SPKAVSDSQN SQTCLDPDAS RSVLGIILGG
101 GAGTRLYPLT KKRAKPAVPL GANYRLIDIP VSNCLNSNIN KIYVLTQFNS
151 ASLNRHLSRA YATNMGGYKN EGFVEVLAAQ QSPENPNWFQ GTADAVRQYL
201 WLFEEHNVLE YLILAGDHLY RMDYEKFIQA HRETDADITV AALPMDEERA
251 TAFGLMKIDE EGRIVEFAEK PKGEQLKAMK VDTTILGLDD KRAKEMPYIA
301 SMGIYVSKD VMLELLRNTF PGANDFGSEV IPGATSLGLR VQAYLYDGYW
351 EDIGTIEAFY NANLGITKKP VPDFSFYDRS APIYTPRYL PPSKMLDADV
401 TDSVIGEGCV IKNCKIHHSV VGLRSCISEG AIIEDSLLMG ADYYETASEK
451 SLLTAKGSVP IGIGKSSHIK RAIDKNARI GDNVKIINSD NVQEAARETE
501 GYFIKSGIVT VIKDALIPTG TLI

```

Matched peptides information:

| Start - End | Observed  | Mr (expt) | Mr (calc) | ppm  | Miss | Sequence                            |
|-------------|-----------|-----------|-----------|------|------|-------------------------------------|
| 92 - 105    | 1270.6042 | 1269.5969 | 1269.7405 | -113 | 0    | R.SVLGIILGGGAGTR.L                  |
| 106 - 111   | 734.3071  | 733.2999  | 733.4374  | -188 | 0    | R.LYPLTK.K                          |
| 106 - 112   | 862.2992  | 861.2919  | 861.5324  | -279 | 1    | R.LYPLTKK.R                         |
| 114 - 125   | 1256.5662 | 1255.5589 | 1255.7037 | -115 | 1    | R.AKPAVPLGANYR.L                    |
| 116 - 125   | 1057.4450 | 1056.4377 | 1056.5716 | -127 | 0    | K.PAVPLGANYR.L                      |
| 142 - 155   | 1625.7078 | 1624.7005 | 1624.8573 | -96  | 0    | K.IYVLTQFNSASLNR.H                  |
| 160 - 169   | 1091.3732 | 1090.3659 | 1090.4753 | -100 | 0    | R.YATNMGGYK.N Oxidation (M)         |
| 227 - 232   | 771.3355  | 770.3282  | 770.4187  | -117 | 0    | K.FIQAHR.E                          |
| 233 - 249   | 1891.6908 | 1890.6835 | 1890.8517 | -89  | 0    | R.ETDADITVAALPMDEER.A Oxidation (M) |
| 250 - 257   | 854.3034  | 853.2961  | 853.4368  | -165 | 0    | R.ATAFGLMK.I Oxidation (M)          |
| 258 - 263   | 718.2578  | 717.2505  | 717.3293  | -110 | 0    | K.IDEEGR.I                          |
| 264 - 272   | 1060.4417 | 1059.4344 | 1059.5964 | -153 | 1    | R.IVEFAEKPK.G                       |
| 281 - 292   | 1345.5819 | 1344.5746 | 1344.7249 | -112 | 1    | K.VDTTILGLDDKR.A                    |
| 310 - 317   | 988.4052  | 987.3979  | 987.5423  | -146 | 0    | K.DVMLELLR.N                        |
| 310 - 317   | 1004.4015 | 1003.3942 | 1003.5372 | -142 | 0    | K.DVMLELLR.N Oxidation (M)          |
| 318 - 340   | 2320.0447 | 2319.0374 | 2319.1495 | -48  | 0    | R.NTFPGANDFGSEVIPGATSLGLR.V         |
| 369 - 379   | 1370.5429 | 1369.5356 | 1369.6667 | -96  | 1    | K.KPVPDFSFYDR.S                     |
| 380 - 388   | 1032.4244 | 1031.4171 | 1031.5400 | -119 | 0    | R.SAPIYTPRY.Y                       |
| 416 - 424   | 1017.4799 | 1016.4726 | 1016.5880 | -113 | 0    | K.IHHSVVGLR.S                       |
| 457 - 465   | 827.3362  | 826.3290  | 826.4913  | -196 | 0    | K.GSVPIGIGK.S                       |
| 466 - 471   | 727.3334  | 726.3262  | 726.4137  | -120 | 1    | K.SSHIKR.A                          |
| 471 - 476   | 715.2835  | 714.2762  | 714.4388  | -228 | 1    | K.RAIDK.N                           |
| 472 - 479   | 900.4063  | 899.3990  | 899.5188  | -133 | 1    | R.AIDKNAR.I                         |
| 486 - 497   | 1329.5379 | 1328.5306 | 1328.6684 | -104 | 0    | K.IINSDNVQEAAR.E                    |
| 498 - 505   | 986.3837  | 985.3764  | 985.4756  | -101 | 0    | R.ETEGYFIK.S                        |
| 506 - 513   | 816.3540  | 815.3468  | 815.5117  | -202 | 0    | K.SGIVTVIK.D                        |

Spot No.: **82**

Mascot score: **87**    Sequence coverage %: **25**

NCBI accession No.: **gi| 168054422**

Matched peptides No.: **5**

Total peptides No.: **17**

Calculated Mr: **13541**

Calculated pI: **5.36**

### Annotated PMF spectra:

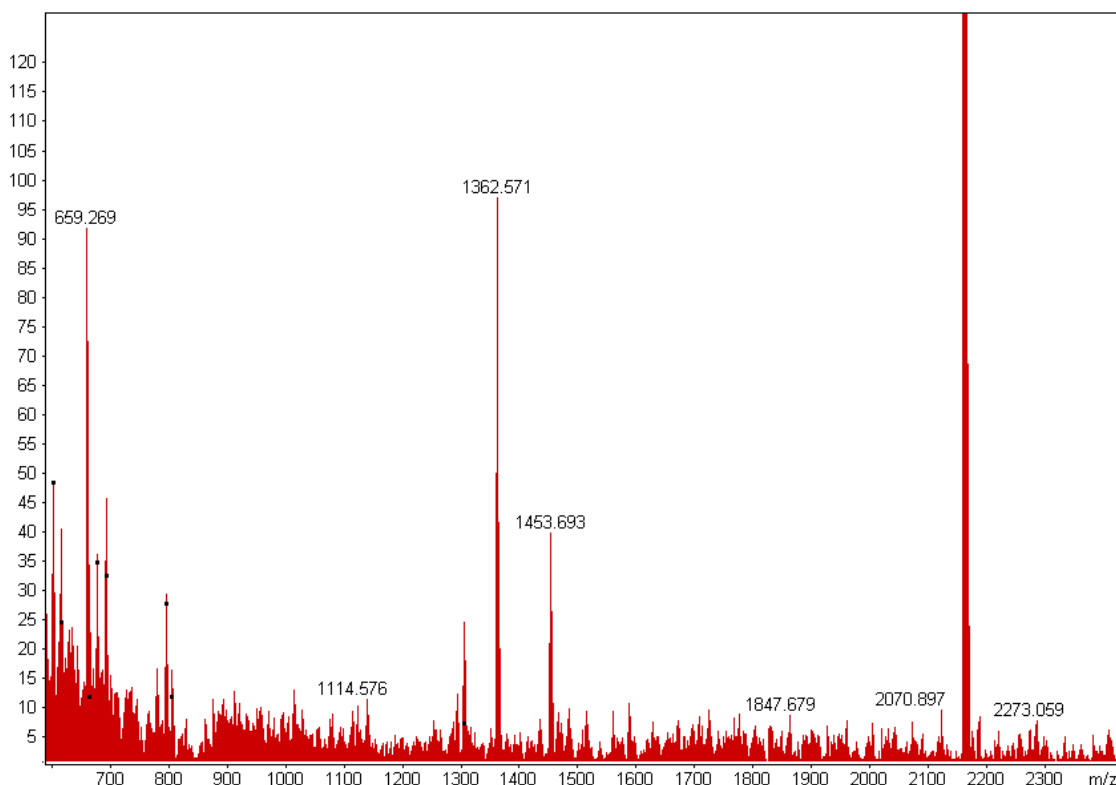

### Probability Based Mowse Score:

Protein score is  $-10 \cdot \log(P)$ , where  $P$  is the probability that the observed match is a random event. Protein scores greater than 72 are significant ( $p < 0.05$ ).

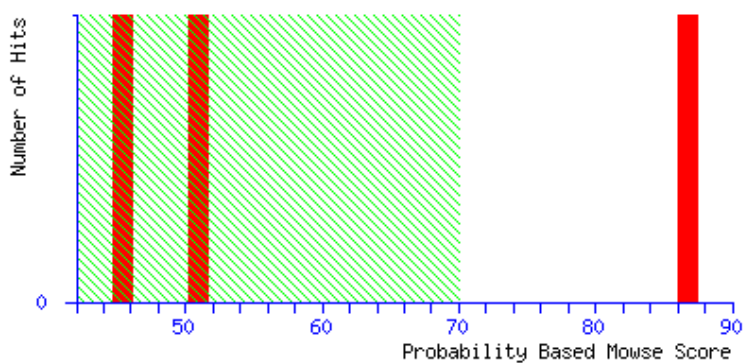

## Matched peptide sequences: shown in **Bold Red**

**1 MDSQEIDTMP VRLSQPTSSR RRPRDEEPPV PRRRRRILSN RSLVIVFESE**  
**51** PAYDGQLEGI FAGQFHNET EVHAWSEVEG VGHYRWLQGP VNYLPREQQL  
**101** EFIADVMPQI FIFLR

## Matched peptides information:

| Start - End | Observed  | Mr(expt)  | Mr(calc)  | ppm | Miss | Sequence                              |
|-------------|-----------|-----------|-----------|-----|------|---------------------------------------|
| 1 - 12      | 1453.6930 | 1452.6857 | 1452.6225 | 44  | 0    | -.MDSQEIDTMPVR.L 2 Oxidation (M)      |
| 2 - 12      | 1306.6153 | 1305.6080 | 1305.5871 | 16  | 0    | M.DSQEIDTMPVR.L Oxidation (M)         |
| 2 - 20      | 2162.9783 | 2161.9710 | 2162.0274 | -26 | 1    | M.DSQEIDTMPVRLSQPTSSR.R Oxidation (M) |
| 21 - 24     | 584.3655  | 583.3582  | 583.3666  | -14 | 1    | R.RRPR.D                              |
| 37 - 41     | 602.3414  | 601.3341  | 601.3547  | -34 | 0    | R.ILSNR.S                             |

Spot No.: **83**

Mascot score: **93**    Sequence coverage %: **27**

NCBI accession No.: **gi| 312281815**

Matched peptides No.: **13**

Total peptides No.: **29**

Calculated Mr: **47893**

Calculated pI: **5.55**

### Annotated PMF spectra:

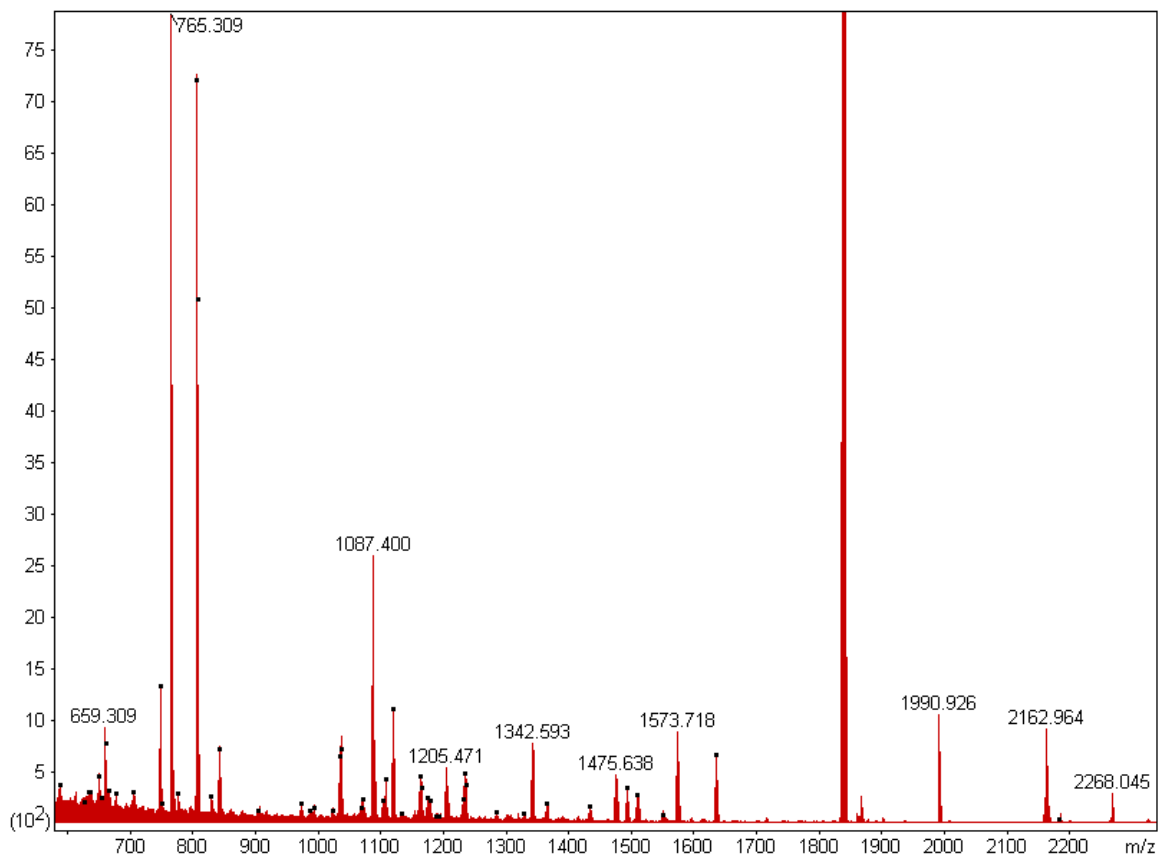

### Probability Based Mowse Score:

Protein score is  $-10 \cdot \log(P)$ , where P is the probability that the observed match is a random event. Protein scores greater than 72 are significant ( $p < 0.05$ ).

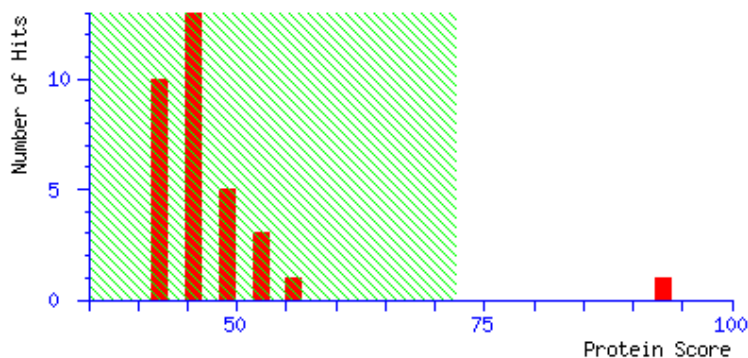

Matched peptide sequences: shown in **Bold Red**

```

1 MATITHVKAR QIFDSSRGNPT VEVDVHTSTG VQVRAAVPSG ASTGIYEALE
51 LRDGGS DYLG KGVSKAVGNV NSIIGPALIG KDPTQQTAID NFMVHELDGT
101 QNEGWCKQK LGANAILAVS LAVCKAGAVV SGIPLYKHIA NLAGNPKLVL
151 PVPAFNVI NG GSHAGNKLAM QEFMILPVGA SSFKEAMKMG VEVYHNLKSV
201 IKKKYQDAT NVGDEGGFAP NIQENKEGLE LLKTAIEKAG YTGKVVIGMD
251 VAASEFYSSD KTYDLNFKEE NMSGSEKISG EALKDLYKSF VAEYPIVSIE
301 DPFQDDWEH YAKMTGECGE KVQIVGDDLL VTNPKRVAKA ISEKSCNALL
351 LKVNQIGSVT ESIEAVKMSK RAGWGMASH RSGETEDTFI ADLSVGLSTG
401 QIKTGAPCRS ERLAKYNQLL RIEEELGAEA VYAGANFRTP VEPY

```

Matched peptides information:

| Start - End | Observed  | Mr (expt) | Mr (calc) | ppm  | Miss | Sequence                              |
|-------------|-----------|-----------|-----------|------|------|---------------------------------------|
| 11 - 16     | 765.3091  | 764.3019  | 764.3817  | -104 | 0    | R. <b>QIFDS</b> .G                    |
| 126 - 137   | 1174.5424 | 1173.5351 | 1173.6758 | -120 | 0    | K. <b>AGAVVSGIPLYK</b> .H             |
| 138 - 147   | 1034.4379 | 1033.4306 | 1033.5668 | -132 | 0    | K. <b>HIANLAGNPK</b> .L               |
| 189 - 198   | 1189.4716 | 1188.4643 | 1188.5961 | -111 | 0    | K. <b>MGVEVYHNLK</b> .S               |
| 189 - 198   | 1205.4707 | 1204.4634 | 1204.5910 | -106 | 0    | K. <b>MGVEVYHNLK</b> .S Oxidation (M) |
| 353 - 367   | 1573.7179 | 1572.7106 | 1572.8359 | -80  | 0    | K. <b>VNQIGSVTESIEAVK</b> .M          |
| 372 - 381   | 1071.3973 | 1070.3900 | 1070.5080 | -110 | 0    | R. <b>AGWGMASHR</b> .S                |
| 372 - 381   | 1087.3997 | 1086.3924 | 1086.5029 | -102 | 0    | R. <b>AGWGMASHR</b> .S Oxidation (M)  |
| 382 - 403   | 2268.0449 | 2267.0376 | 2267.1169 | -35  | 0    | R. <b>SGETEDTFIADLSVGLSTGQIK</b> .T   |
| 404 - 409   | 661.2507  | 660.2434  | 660.3013  | -88  | 0    | K. <b>TGAPCR</b> .S                   |
| 416 - 421   | 806.3685  | 805.3612  | 805.4446  | -104 | 0    | K. <b>YNQLLR</b> .I                   |
| 422 - 438   | 1838.7661 | 1837.7588 | 1837.8846 | -68  | 0    | R. <b>IEEELGAEAVYAGANFR</b> .T        |
| 439 - 444   | 705.2303  | 704.2230  | 704.3381  | -163 | 0    | R. <b>TPVEPY</b> .-                   |

Spot No.: **84**

Mascot score: **162**    Sequence coverage %: **26**

NCBI accession No.: **gi| 15223186**

Matched peptides No.: **16**

Total peptides No.: **34**

Calculated Mr: **53980**

Calculated pI: **6.21**

### Annotated PMF spectra:

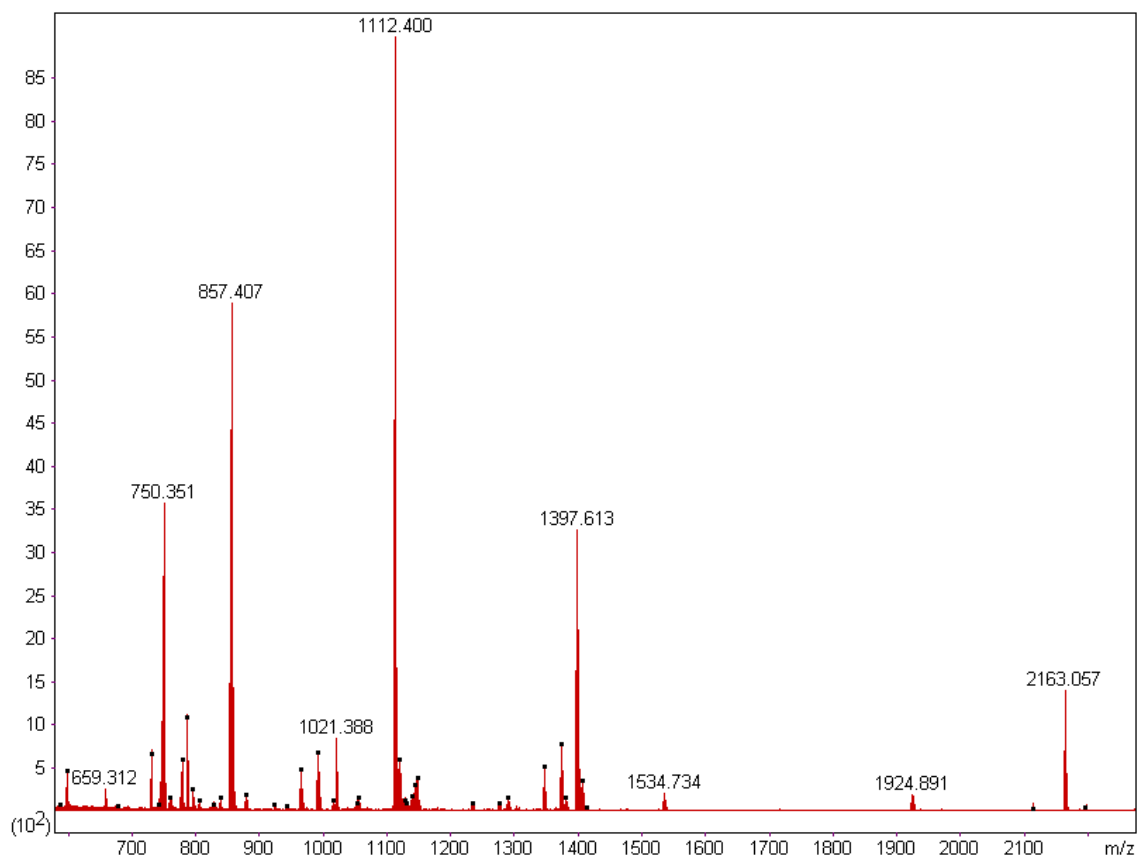

### Probability Based Mowse Score:

Protein score is  $-10 \cdot \log(P)$ , where P is the probability that the observed match is a random event. Protein scores greater than 72 are significant ( $p < 0.05$ ).

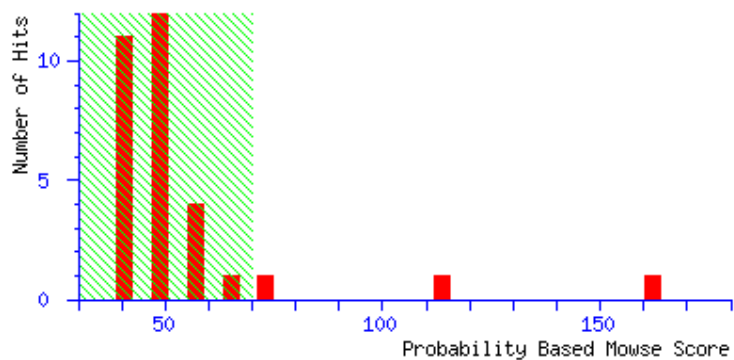



Matched peptide sequences: shown in **Bold Red**

```

1  MSLKALDYES LNENVKNCQY AVRGELYLRA SELQKEGKKI IFTNVGNPHA
51 LGQKPLTFPR QVVS LCQAPF LLDDPNVGM I FPADAIARAK HYL SLTSGGL
101 GAYSDSRGLP GVRKEVAEFI ERRDGYPSDP ELIFLTDGAS KGVMQILNCV
151 IRGQKDGILV PVPQYPLYS A TISLLGGTLV PYYLEESENU GLDVMNLRQS
201 VAQARSQGIT VRAMVIINPG NPTGQCLSEA NIREILRFCC DERLVLLGDE
251 VYQONIYQDE RPFISSKKVL MDMGAPISKE VQLISFHTVS KGYWGECGQR
301 GGYFEMTNIP PRTVEEIIYKV ASIALSPNVS AQIFMGLMVS PPKPGDISYD
351 QFVRESKGIL ESLRRRARM TDGFNSCKNV VCNFTEGAMY SFPQIKLPSK
401 AIQAAKQAGK VPDVFYCLKL LEATGISTVP GSGFGQKEGV FHLRTTILPA
451 EEEMPEIMDS FKKFNDEFMS QYADNFGYSR M

```

Matched peptides information:

| Start - End | Observed  | Mr(expt)  | Mr(calc)  | ppm  | Miss Sequence                            |
|-------------|-----------|-----------|-----------|------|------------------------------------------|
| 24 - 29     | 750.3506  | 749.3433  | 749.4072  | -85  | 0 R.GELYLR.A                             |
| 24 - 35     | 1406.6264 | 1405.6191 | 1405.7565 | -98  | 1 R.GELYLRASELQK.E                       |
| 108 - 113   | 598.3033  | 597.2960  | 597.3598  | -107 | 0 R.GLPGVR.K                             |
| 114 - 122   | 1120.5439 | 1119.5366 | 1119.5924 | -50  | 1 R.KEVAEFIER.R                          |
| 115 - 122   | 992.4408  | 991.4335  | 991.4974  | -64  | 0 K.EVAEFIER.R                           |
| 115 - 123   | 1148.5470 | 1147.5397 | 1147.5985 | -51  | 1 K.EVAEFIERR.D                          |
| 124 - 141   | 1924.8911 | 1923.8838 | 1923.9102 | -14  | 0 R.DGYPSDPELIFLTDGASK.G                 |
| 199 - 205   | 759.3482  | 758.3409  | 758.4035  | -83  | 0 R.QSVAQAR.S                            |
| 234 - 243   | 1397.6129 | 1396.6056 | 1396.6227 | -12  | 1 R.EILRFCCDER.L                         |
| 292 - 300   | 1112.3997 | 1111.3924 | 1111.4505 | -52  | 0 K.GYWGECGQR.G                          |
| 301 - 312   | 1381.6232 | 1380.6159 | 1380.6496 | -24  | 0 R.GGYFEMTNIPPR.T                       |
| 358 - 364   | 787.3918  | 786.3846  | 786.4599  | -96  | 0 K.GILESLR.R                            |
| 358 - 365   | 943.4657  | 942.4584  | 942.5610  | -109 | 1 K.GILESLRR.R                           |
| 411 - 419   | 1140.4852 | 1139.4779 | 1139.5685 | -80  | 0 K.VPDVFYCLK.L                          |
| 438 - 444   | 857.4066  | 856.3993  | 856.4555  | -66  | 0 K.EGVFHLR.T                            |
| 445 - 462   | 2112.9671 | 2111.9598 | 2111.9642 | -2   | 0 R.TTILPAEEEMPEIMDSFK.K 2 Oxidation (M) |

Spot No.: **85**

Mascot score: **125**    Sequence coverage %: **19**

NCBI accession No.: **gi| 68655456**

Matched peptides No.: **11**

Total peptides No.: **21**

Calculated Mr: **49960**

Calculated pI: **5.81**

### Annotated PMF spectra:

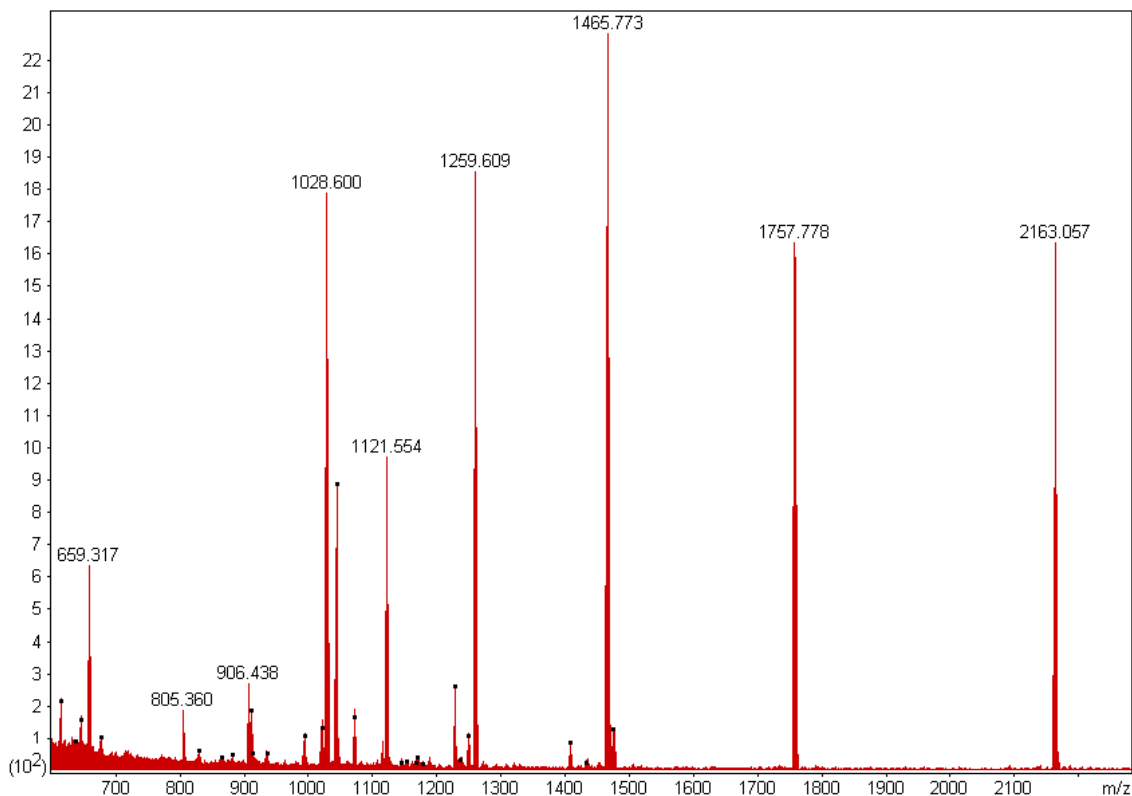

### Probability Based Mowse Score:

Protein score is  $-10 \cdot \log(P)$ , where P is the probability that the observed match is a random event. Protein scores greater than 72 are significant ( $p < 0.05$ ).

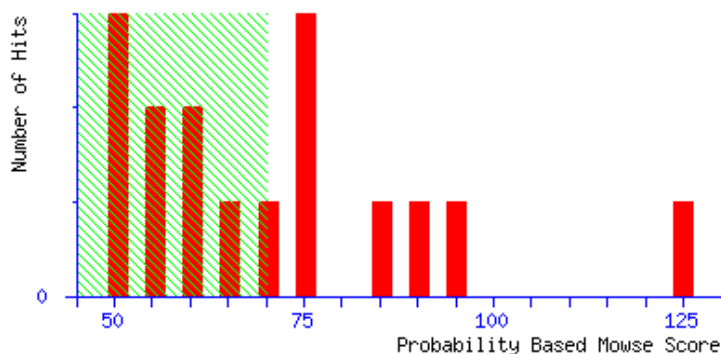

Matched peptide sequences: shown in **Bold Red**

```

1 MPGLMACRTE FGPSQPFKGA RISGSLHMTI QTAVLIETLT ALGAEVRWCS
51 CNIFSTQDHA AAAIARDSAA VFAWKGETLE EYWWCTERCL DWGAGGGPDL
101 IVDDGGDATL LIHEGVKAAE EFEKSGKVPD PESTDNPEFK IVLTIIRDGL
151 KTDASKYRKM KERLVGVSEE TTTGVKRLYQ MQESGTLFP AINVNDSVTK
201 SKFDNLYGCR HSLPDGLMRA TDVMIAGKVA VVCGYGDVVK GCAAALKQAG
251 ARVIVTEIDP ICALQALMEG IQILTLEDVV SEADIFVTTT GNKDIDMVDH
301 MRKMKNNAIV CNIGHFDNEI DMNGLETYPG VKRITIKPQT DRWVFPETKT
351 GIIVLAEGRL MNLGCATGHP SFVMSCSFTN QVIAQLELWN EKASGKYEKK
401 VVVLPHLDE KVAALHLGKL GARLTKLTKS QSDYISIPIE GPYKPAAYRY
451

```

Matched peptides information:

| Start - End | Observed  | Mr(expt)  | Mr(calc)  | ppm | Miss | Sequence                           |
|-------------|-----------|-----------|-----------|-----|------|------------------------------------|
| 1 - 8       | 935.4678  | 934.4605  | 934.4187  | 45  | 0    | <b>-.MPGLMACR.T</b>                |
| 67 - 75     | 994.4772  | 993.4700  | 993.4920  | -22 | 0    | <b>R.DSAAVFAWK.G</b>               |
| 118 - 124   | 881.3795  | 880.3722  | 880.3814  | -10 | 0    | <b>K.AEEEFEK.S</b>                 |
| 118 - 127   | 1153.5627 | 1152.5554 | 1152.5298 | 22  | 1    | <b>K.AEEEFEKSGK.V</b>              |
| 164 - 177   | 1475.7631 | 1474.7558 | 1474.7991 | -29 | 1    | <b>R.LVGVSEETTTGVKR.L</b>          |
| 201 - 210   | 1259.6090 | 1258.6017 | 1258.5764 | 20  | 1    | <b>K.SKFDNLYGCR.H</b>              |
| 203 - 210   | 1044.4684 | 1043.4611 | 1043.4495 | 11  | 0    | <b>K.FDNLYGCR.H</b>                |
| 294 - 302   | 1145.5487 | 1144.5414 | 1144.5369 | 4   | 0    | <b>K.DIDMVDHMR.K</b> Oxidation (M) |
| 334 - 342   | 1071.5983 | 1070.5910 | 1070.6084 | -16 | 0    | <b>R.ITIKPQDR.W</b>                |
| 343 - 349   | 906.4379  | 905.4306  | 905.4647  | -38 | 0    | <b>R.WVFPETK.T</b>                 |
| 350 - 359   | 1028.5998 | 1027.5925 | 1027.6026 | -10 | 0    | <b>K.TGIIVLAEGR.L</b>              |

Spot No.: **86**

Mascot score: **81**    Sequence coverage %: **14**

NCBI accession No.: **gi| 30688330**

Matched peptides No.: **9**

Total peptides No.: **15**

Calculated Mr: **53780**

Calculated pI: **6.49**

### Annotated PMF spectra:

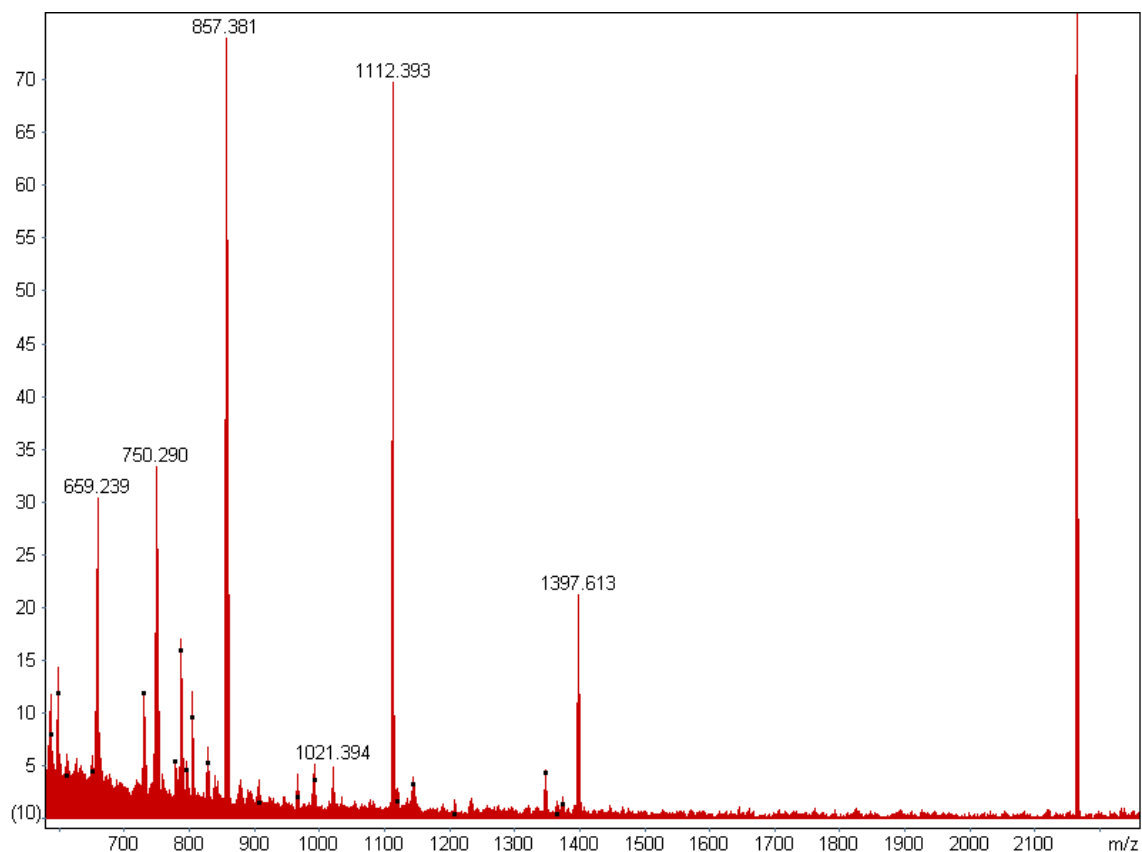

### Probability Based Mowse Score:

Protein score is  $-10 \cdot \log(P)$ , where P is the probability that the observed match is a random event. Protein scores greater than 72 are significant ( $p < 0.05$ ).

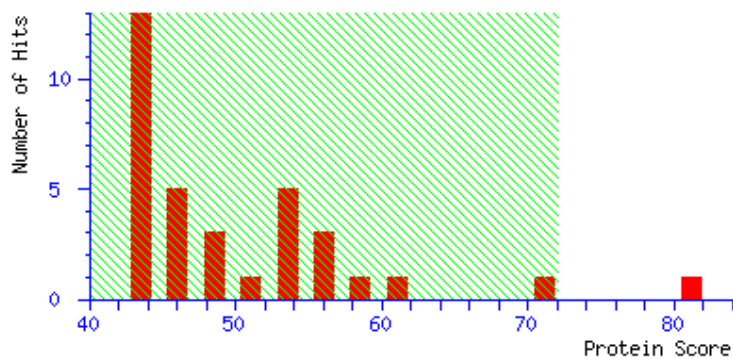

Matched peptide sequences: shown in **Bold Red**

```

1 MALKALDYDT LNENVKKCQY AVRGELYLRA SELQKEGKKI IFTNVGNPHA
51 LGQKPLTFPR QVVALCQAPF LLDDPNVGM LFPADAIARAK HYLSTSGGL
101 GAYSDSRGLP GVRKEVAEFI QRRDGYPSDP ELIFLIDGAS KGVMQILNCV
151 IRGNGDGILV PVPQYPLYSA TISLLGGTLV PYYLDESENW GLDVANLRQS
201 VAQARSQGIT VRAMVIINPG NPTGQCLSEA NIREILKFCY NEKLVLGDE
251 VYQQNIYQDE RPFISSKKVL MEMGSPFSKE VQLVSFHTVS KGYWGECGQR
301 GGYFEMTNLP PRVVEEIKV ASIALSPNVS AQIFMGLMVN PPKPGDISYD
351 QFARESKGIL ESLRRRARLM TDGFNSCKNV VCNFTEGAMY SFPQIRLPTG
401 ALQAAKQAGK VPDVIFYCLKL LEATGISTVP GSGFGQKEGV FHLRTTILPA
451 EDEMPEIMDS FKKFNDEFMT QYDNNFGYSK M

```

Matched peptides information:

| Start - End | Observed  | Mr (expt) | Mr (calc) | ppm  | Miss | Sequence               |
|-------------|-----------|-----------|-----------|------|------|------------------------|
| 18 - 23     | 796.2213  | 795.2140  | 795.3698  | -196 | 0    | K.CQYAVR.G             |
| 24 - 29     | 750.2899  | 749.2826  | 749.4072  | -166 | 0    | R.GELYLR.A             |
| 55 - 60     | 730.3282  | 729.3209  | 729.4174  | -132 | 0    | K.PLTFPR.Q             |
| 108 - 113   | 598.2109  | 597.2037  | 597.3598  | -261 | 0    | R.GLPGVR.K             |
| 280 - 291   | 1373.6760 | 1372.6687 | 1372.7351 | -48  | 0    | K.EVQLVSFHTVSK.G       |
| 292 - 300   | 1112.3934 | 1111.3861 | 1111.4505 | -58  | 0    | K.GYWGE <b>CGQR</b> .G |
| 301 - 312   | 1397.6131 | 1396.6058 | 1396.6445 | -28  | 0    | R.GGYFEMTNLPPR.V       |
| 358 - 364   | 787.3150  | 786.3078  | 786.4599  | -193 | 0    | K.GILESLR.R            |
| 438 - 444   | 857.3810  | 856.3737  | 856.4555  | -96  | 0    | K.EGVFHLR.T            |

Spot No.: **87**

Mascot score: **96**    Sequence coverage %: **26**

NCBI accession No.: **gi| 30688330**

Matched peptides No.: **9**

Total peptides No.: **27**

Calculated Mr: **46598**

Calculated pI: **5.55**

### Annotated PMF spectra:

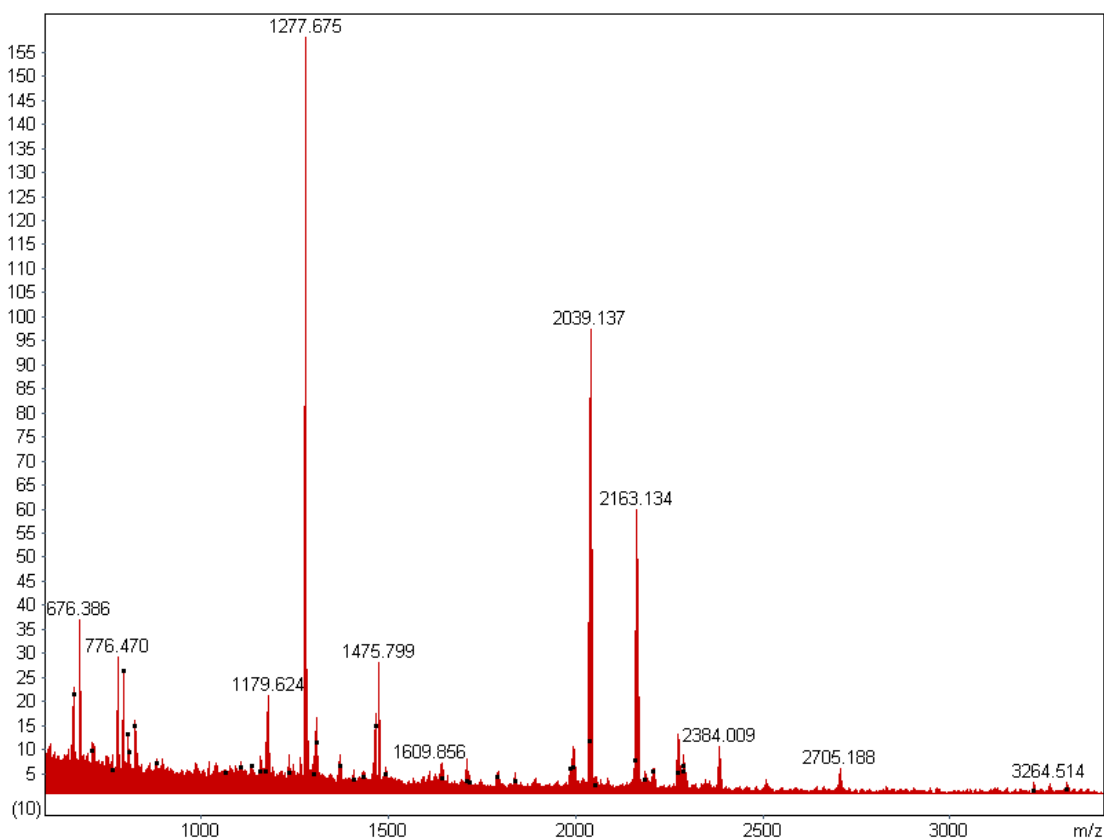

### Probability Based Mowse Score:

Protein score is  $-10 \cdot \log(P)$ , where P is the probability that the observed match is a random event. Protein scores greater than 72 are significant ( $p < 0.05$ ).

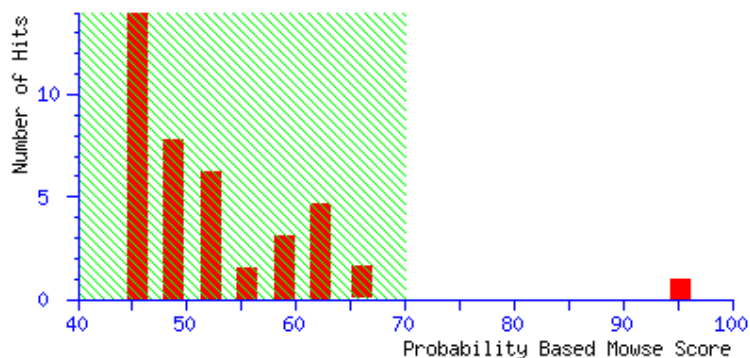

## Matched peptide sequences: shown in **Bold Red**

**1 MALVMHTYKG NKGANKALIA AEYAGVKIEE SADFMQGVIN KSPEFLKMP**  
**51 IGVLPVLETP EGPIFESNAI ARYVSRKNGD NSLNGSSLIE YAHIEQWIDF**  
**101 SSLEIDANML KWFAPRMGYA PFSAPAEAAA ISALKRGLA LNTHLASNTF**  
**151 LVGHSVTLAD IVTICNLNLG FATVMTKKFT SAFPHVERYF WTMVNOPEFK**  
**201 KVLGDAKQTE AVPPVPTKKA POPAKPKEEP KKAAPVAEAP KPAEEEEAPK**  
**251 PKAKNPLDLL PPSPMVLDDW KRLYSNTKSN FREVAIKGFW DMYDPEGYSL**  
**301 WFCDYKYNDE NMVSFVTLNK VGGFLQRMDL ARKYSFGKML ICGSEGPFKV**  
**351 KGLWLFGRPE IPKFIMDEVY DMELYEWTKV DISDEAQKER VSQMIEDAEP**  
**401 FEGEALLDAK CFK**

## Matched peptides information:

| Start - End | Observed  | Mr(expt)  | Mr(calc)  | ppm | Miss | Sequence                               |
|-------------|-----------|-----------|-----------|-----|------|----------------------------------------|
| 2 - 12      | 1277.6751 | 1276.6678 | 1276.6598 | 6   | 1    | M.ALMHTYKGNK.G Oxidation (M)           |
| 13 - 27     | 1475.7990 | 1474.7917 | 1474.8143 | -15 | 1    | K.GANKALIAEYAGVK.I                     |
| 28 - 47     | 2286.2870 | 2285.2797 | 2285.0885 | 84  | 1    | K.IEESADFMQGVINKSPEFLK.M Oxidation (M) |
| 48 - 53     | 659.3788  | 658.3715  | 658.3472  | 37  | 0    | K.MNPICK.V                             |
| 54 - 72     | 2039.1368 | 2038.1295 | 2038.0735 | 27  | 0    | K.VPVLETPEGPIFESNAIAR.Y                |
| 112 - 116   | 676.3860  | 675.3787  | 675.3493  | 44  | 0    | K.WFAPR.M                              |
| 321 - 327   | 776.4695  | 775.4622  | 775.4341  | 36  | 0    | K.VGGFLQR.M                            |
| 352 - 357   | 791.4821  | 790.4749  | 790.4490  | 33  | 0    | K.GLWLF.R                              |
| 391 - 410   | 2208.1152 | 2207.1079 | 2207.0303 | 35  | 0    | R.VSQMIEDAEPFEGEALLDAK.C Oxidation (M) |

Spot No.: **88**

Mascot score: **83**    Sequence coverage %: **40**

NCBI accession No.: **gi| 76782076**

Matched peptides No.: **9**

Total peptides No.: **61**

Calculated Mr: **19172**

Calculated pI: **5.70**

### Annotated PMF spectra:

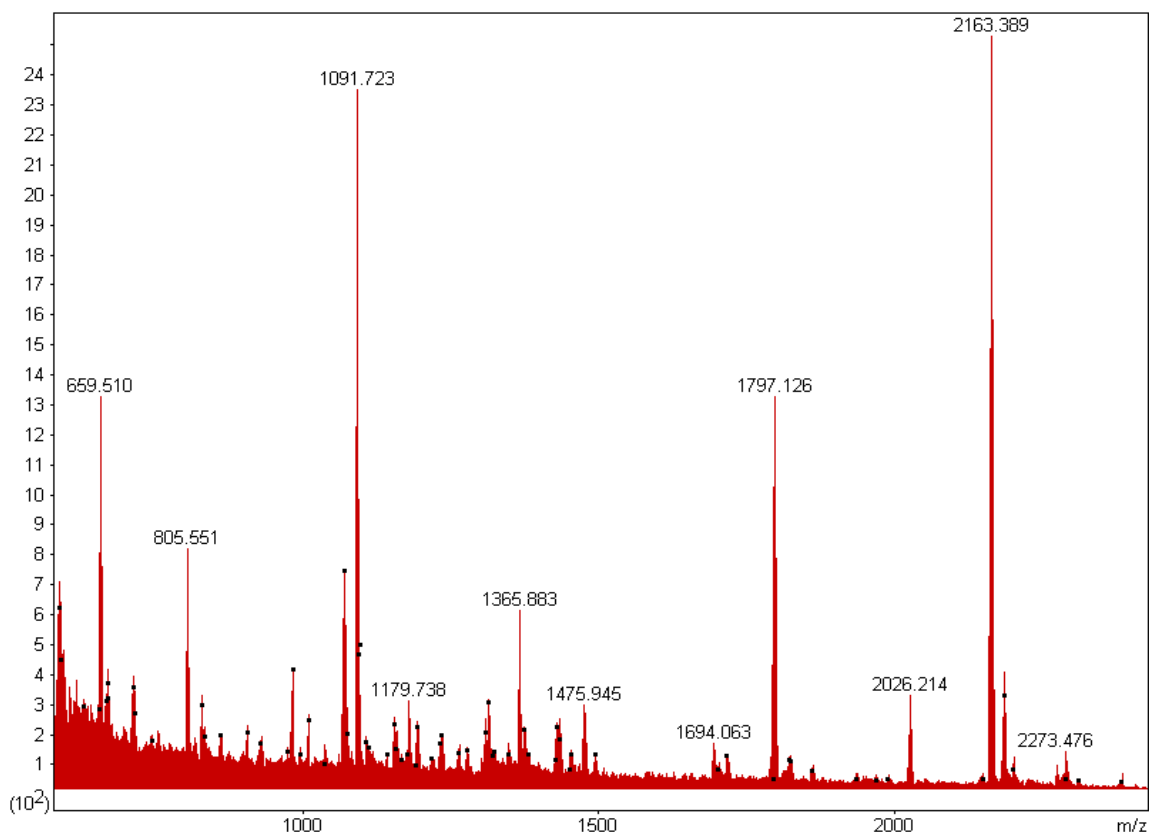

### Probability Based Mowse Score:

Protein score is  $-10 \cdot \log(P)$ , where P is the probability that the observed match is a random event. Protein scores greater than 72 are significant ( $p < 0.05$ ).

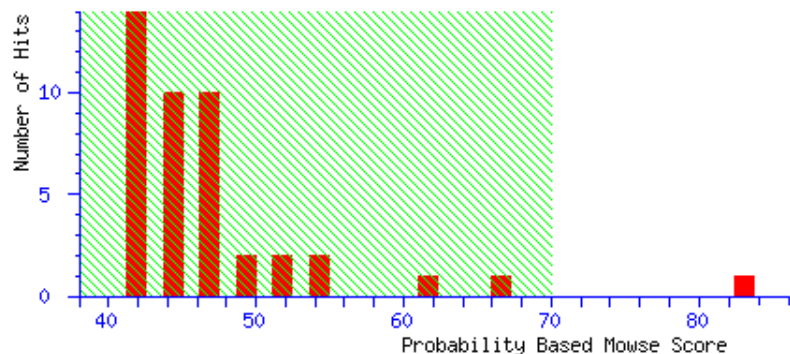



Matched peptide sequences: shown in **Bold Red**

1 **MQALALRALA VKSPINATLP CWRLPERXAL** ISTHTXPAAS YNISRSVHAS  
51 **QEELSDSQSA MDAHK**KADAE** AGAK**TFHSDR** DDMADSEFGDA YSTRSSDEGF**  
101 **GQRYTEHIKC GPALSEGAEA TVERDADPHV EVRREYDESQ** GSEVREKEKA  
151 RHATEHTAFL AHNRPTRGV GGTAT

Matched peptides information:

| Start - End | Observed  | Mr (expt) | Mr (calc) | ppm | Miss | Sequence                                |
|-------------|-----------|-----------|-----------|-----|------|-----------------------------------------|
| 2 - 7       | 671.3785  | 670.3712  | 670.4126  | -62 | 0    | M.QALALR.A                              |
| 2 - 12      | 1153.7147 | 1152.7074 | 1152.7342 | -23 | 1    | M.QALALRALAVK.S                         |
| 8 - 23      | 1797.1264 | 1796.1191 | 1795.9767 | 79  | 1    | R.ALAVKSPINATLPCWR.L                    |
| 13 - 23     | 1314.8304 | 1313.8231 | 1313.6550 | 128 | 0    | K.SPINATLPCWR.L                         |
| 66 - 74     | 860.5463  | 859.5390  | 859.4399  | 115 | 1    | K.KADAEAGAK.T                           |
| 67 - 80     | 1475.9452 | 1474.9379 | 1474.6801 | 175 | 1    | K.ADAEAGAKTFHSDR.D                      |
| 75 - 94     | 2310.4357 | 2309.4284 | 2308.9291 | 216 | 1    | K.TFHSDRDDMADSEFGDAYSTR.S Oxidation (M) |
| 95 - 103    | 982.6394  | 981.6322  | 981.4152  | 221 | 0    | R.SSEDEGFGQR.Y                          |
| 125 - 134   | 1193.7383 | 1192.7310 | 1192.5949 | 114 | 1    | R.DADPHVEVRR.E                          |

Spot No.: **89**

Mascot score: **96**    Sequence coverage %: **20**

NCBI accession No.: **gi| 116787113**

Matched peptides No.: **10**

Total peptides No.: **22**

Calculated Mr: **53356**

Calculated pI: **5.66**

### Annotated PMF spectra:

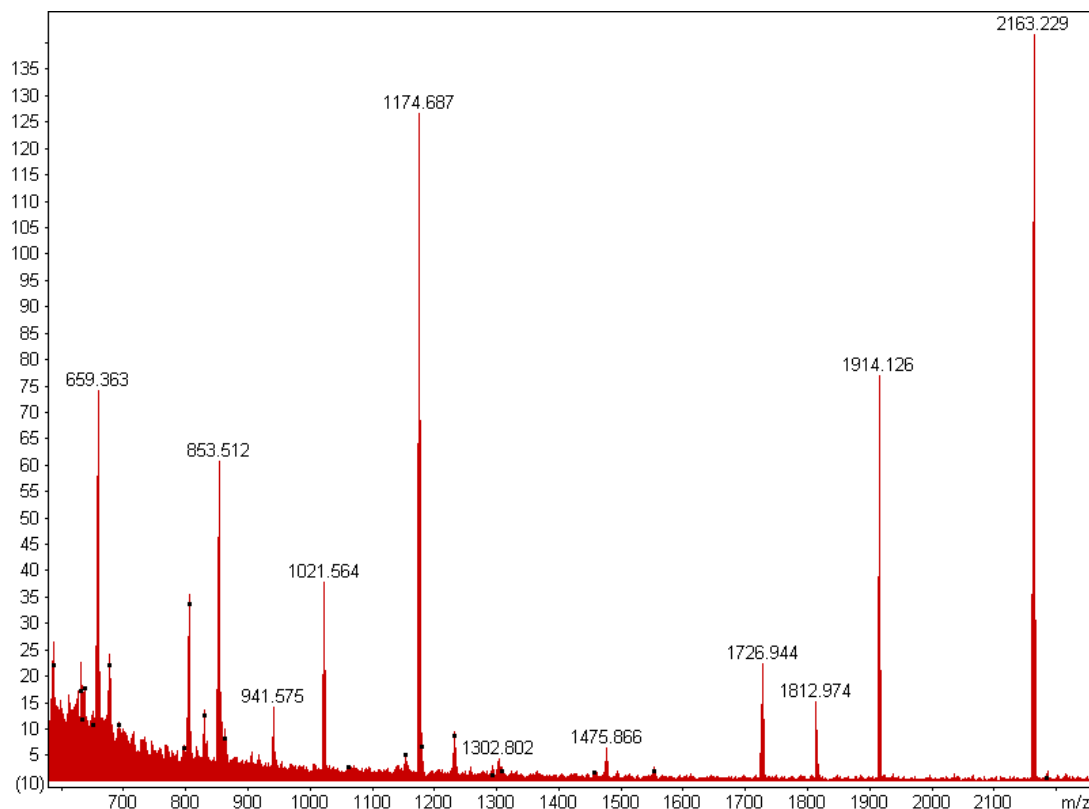

### Probability Based Mowse Score:

Protein score is  $-10 \cdot \log(P)$ , where P is the probability that the observed match is a random event. Protein scores greater than 72 are significant ( $p < 0.05$ ).

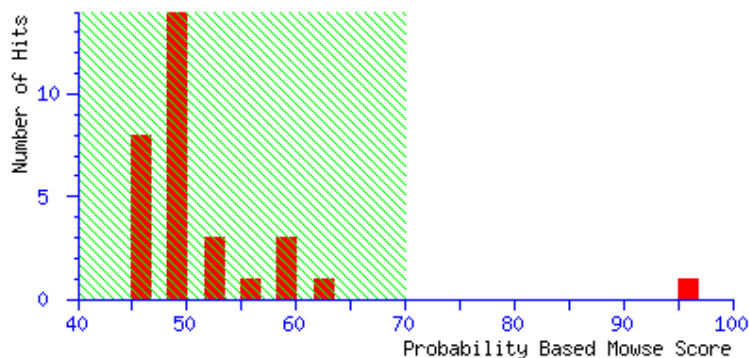

## Matched peptide sequences: shown in **Bold Red**

```

 1 MAAAAAVASP AVETDQISKL QAEVTKLNQI SDNEKIGFVR LVSRHLSGEE
 51 ERIEWKIKT PTDEVVVPYD TMAAVGEDPL ETKQLLDKLV VLKLNGLGT
101 TMGCTGPKSV IEVRNGLTFL DLIVKQIESL MNKYDSRVPL VLMNSFNTHD
151 DTIKIVEKYS RSNIDIHIFN QSQYPRLVEE DLTPWPTKGR TDKEGWYPPG
201 HGDVFPALLN SGKLGELLSQ GKEYVFIANS DNLGAIVDLK ILNHMVKNKN
251 EYCMVTPKT LADVKGGTLI SYEGRVQLE IAQVPKEHVG EFKSIEKFKI
301 FNTNWLWNL KAIKRLVEAD ALKMEIIPNP KEVDGVKVLQ LETAAGAAIR
351 FFYRAIGVNV PRSRFLPVKA TSDLLLVSQSD LYTVEEGFVI RNPARVNPAN
401 PSIELGPEFK KVGNFLKRFK SIPSIIDLDS LKVSQDVWFG SEIILKGVK
451 VEAQGGKLE IPDESVIENK VVSNLEDIAN

```

## Matched peptides information:

| Start - End | Observed  | Mr(expt)  | Mr(calc)  | ppm  | Miss | Sequence                               |
|-------------|-----------|-----------|-----------|------|------|----------------------------------------|
| 27 - 35     | 1060.5698 | 1059.5625 | 1059.5196 | 40   | 0    | K.LNQISDNEK.I                          |
| 94 - 114    | 2163.2293 | 2162.2220 | 2162.0824 | 65   | 1    | K.LNGLGTTMGCTGPKSVIEVR.N Oxidation (M) |
| 115 - 125   | 1232.6503 | 1231.6430 | 1231.7176 | -61  | 0    | R.NGLTFLDLIVK.Q                        |
| 250 - 265   | 1914.1257 | 1913.1184 | 1912.8910 | 119  | 1    | K.NEYCMVTPKTLADV.K Oxidation (M)       |
| 287 - 297   | 1302.8018 | 1301.7945 | 1301.6615 | 102  | 1    | K.EHVGEFKSIEK.F                        |
| 300 - 311   | 1475.8665 | 1474.8592 | 1474.7932 | 45   | 0    | K.IFNTNWLWNLK.A                        |
| 324 - 331   | 941.5747  | 940.5674  | 940.5052  | 66   | 0    | K.MEIIPNPK.E                           |
| 351 - 354   | 632.3148  | 631.3076  | 631.3118  | -7   | 0    | R.FFYR.A                               |
| 411 - 417   | 805.4198  | 804.4125  | 804.4858  | -91  | 1    | K.KVGNFLK.R                            |
| 412 - 417   | 677.3244  | 676.3171  | 676.3908  | -109 | 0    | K.VGNFLK.R                             |

Spot No.: **90**

Mascot score: **93**    Sequence coverage %: **23**

NCBI accession No.: **gi| 15234354**

Matched peptides No.: **8**

Total peptides No.: **19**

Calculated Mr: **43627**

Calculated pI: **5.67**

### Annotated PMF spectra:

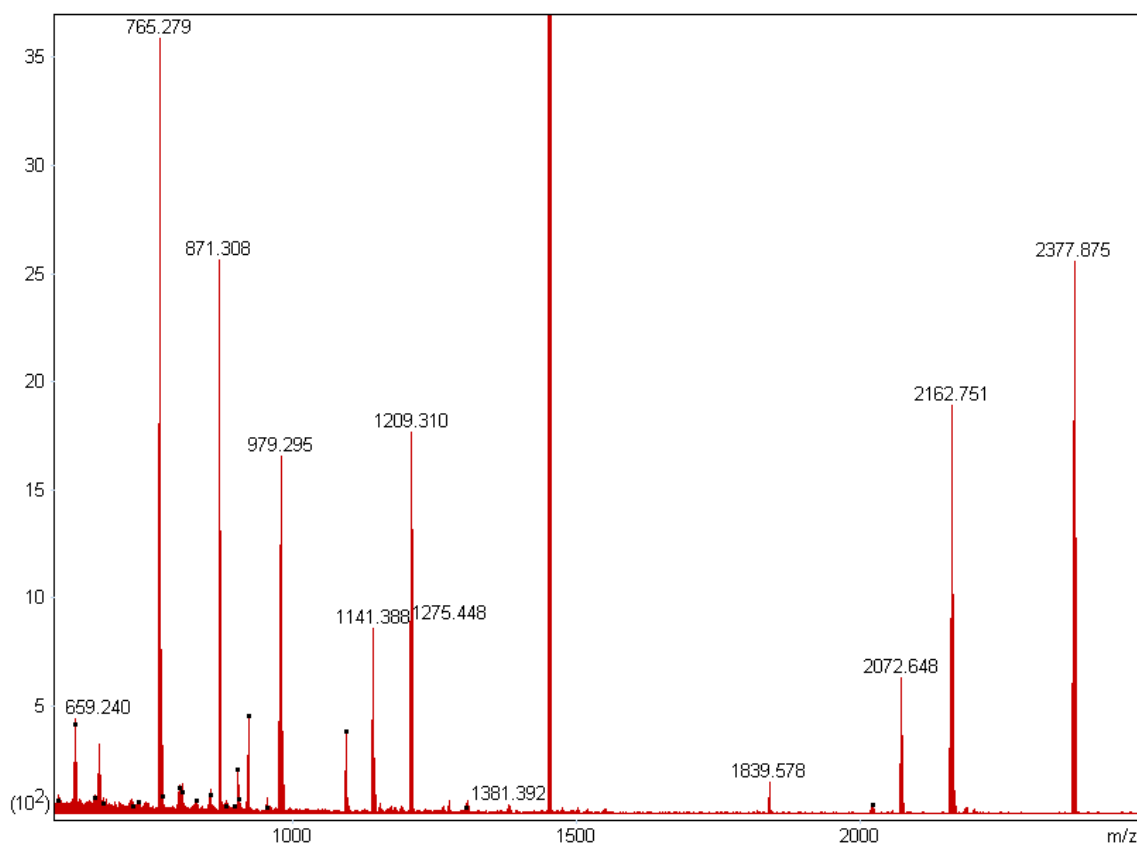

### Probability Based Mowse Score:

Protein score is  $-10 \cdot \log(P)$ , where P is the probability that the observed match is a random event. Protein scores greater than 72 are significant ( $p < 0.05$ ).

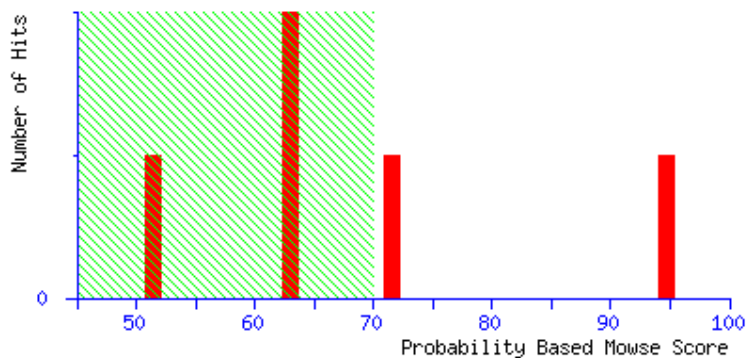

Matched peptide sequences: shown in **Bold Red**

**1** METFLFTSES VNEGHPDKLC DQISDAVLDA CLEQDPDSKV ACETCTKTNM  
**51** VMVFGEITTK ATIDYEKIVR DTCR**SIGFIS** **DDVGLDADKC** KVLVNIEQQS  
**101** PDIAQGVHGH FTKRPEDIGA GDQGHMFGYA TDETPELMPL SHVLATKIGA  
**151** **RLTEVR**KNGT CR**WLRPDGKT** QVTVEYYNDM GAMVPVR**VHT** **VLISTQHDET**  
**201** **VTNDEIAR**DL KEHVIKPIIP EKYLDDK**TIF** **HLNPSGRFVI** **GGPHGDAGLT**  
**251** **GRKIIIDTYG** GWGAHGGGAF SGKDPTKVDR **SGAYIVR**QAA KSVVANGMAR  
**301** RALVQVSYAI GVPEPLSVFV DTYGTGLIPD KEILKIVKET FDFRPGMMTI  
**351** NLDLKRGGNG RFQK**TAAYGH** **FGRDDPDFTW** EVVKPLKWDK PQA

Matched peptides information:

| Start - End | Observed  | Mr(expt)  | Mr(calc)  | ppm  | Miss | Sequence                  |
|-------------|-----------|-----------|-----------|------|------|---------------------------|
| 75 - 91     | 1839.5784 | 1838.5711 | 1838.8720 | -164 | 1    | R.SIGFISDDVGLDADKCK.V     |
| 152 - 156   | 617.2275  | 616.2202  | 616.3544  | -218 | 0    | R.LTEVR.K                 |
| 163 - 169   | 871.3079  | 870.3007  | 870.4712  | -196 | 0    | R.WLRPDGK.T               |
| 188 - 208   | 2377.8746 | 2376.8673 | 2377.1874 | -135 | 0    | R.VHTVLISTQHDETVTNDEIAR.D |
| 228 - 237   | 1141.3881 | 1140.3808 | 1140.6040 | -196 | 0    | K.TIFHLNPSGR.F            |
| 238 - 252   | 1453.4929 | 1452.4856 | 1452.7474 | -180 | 0    | R.FVIGGPHGDAGLTGR.K       |
| 281 - 287   | 765.2791  | 764.2719  | 764.4181  | -191 | 0    | R.SGAYIVR.Q               |
| 365 - 373   | 979.2949  | 978.2876  | 978.4672  | -183 | 0    | K.TAAYGHFGR.D             |

Spot No.: **91**

Mascot score: **88**    Sequence coverage %: **18**

NCBI accession No.: **gi| 30691729**

Matched peptides No.: **9**

Total peptides No.: **30**

Calculated Mr: **47767**

Calculated pI: **5.93**

### Annotated PMF spectra:

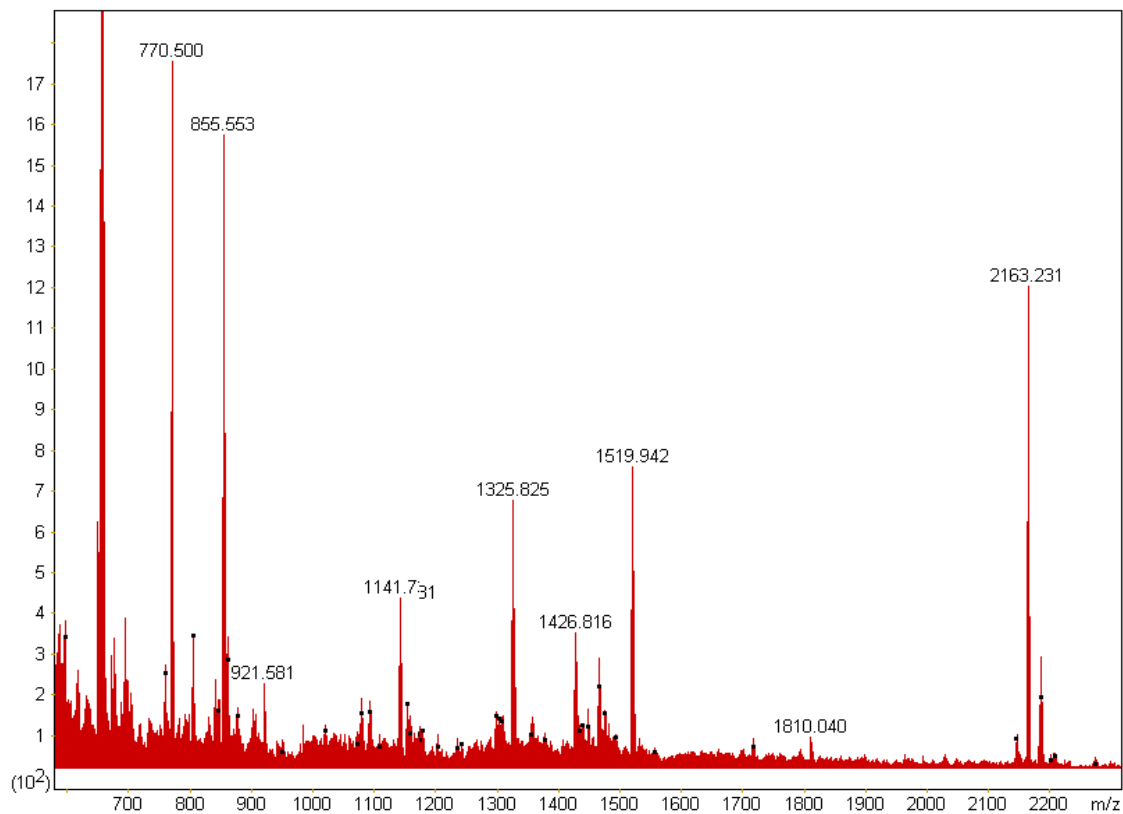

### Probability Based Mowse Score:

Protein score is  $-10 \cdot \log(P)$ , where P is the probability that the observed match is a random event. Protein scores greater than 72 are significant ( $p < 0.05$ ).

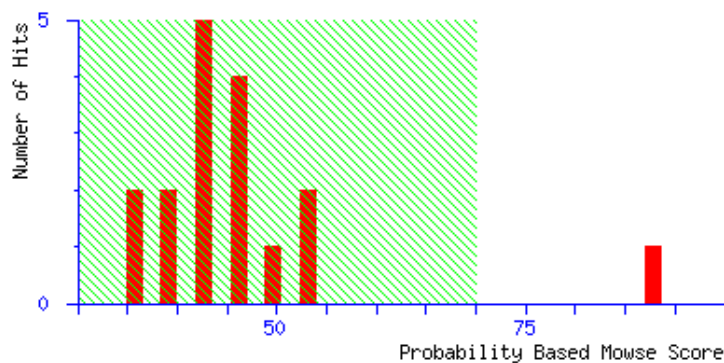

## Matched peptide sequences: shown in **Bold Red**

```

1  MSLRLRLLLVV  VVLHLSAVAG  DDAIVSRFQE YLRINTVQPN PEYYKAVDFI
51 ISQAKPLSLE  SQTIEFVKGK  PLLLLKVVGS  DPTLPAFLLN  SHTDVVVPFED
101 SKWTHHPLQA  HMDHHGDIYA  RGSQDMKCVG MQYLEAIRKL QASGFKPLRS
151 VYLSFVPEDE  IGGHDGAEKF  AESQLFKSLN  IAIVLDEGLP  SPTESYRVFY
201 GERSPWWLVI  KAKGPPGHGA  KLYDNSAMEN LLKSIESIRR FRASQFDLLK
251 AGGIAEGDVV  SVNMAFLKAG  TPSPTGFVMN  LQPSEAEAGF  DIRVPPSVDA
301 EALERRLVEE WAPAARNMSF  EFKQKLTGKQ  FLTAADDSNP  WUGLLENAVK
351 EAGGRTSKPE IFPASTDARY  FRKAGVPAFG  FSPISNTPSL  LHDHNEYLGK
401 AEYLGIEVY  VSIIKAYASY  ESKSGSRDEL

```

## Matched peptides information:

| Start - End | Observed  | Mr(expt)  | Mr(calc)  | ppm | Miss | Sequence                       |
|-------------|-----------|-----------|-----------|-----|------|--------------------------------|
| 28 - 33     | 855.5532  | 854.5459  | 854.4286  | 137 | 0    | R.FQEYLR.I                     |
| 34 - 45     | 1465.9184 | 1464.9111 | 1464.7249 | 127 | 0    | R.INTVQPNPEYYK.A               |
| 128 - 138   | 1355.7895 | 1354.7822 | 1354.6373 | 107 | 0    | K.CVGMQYLEAIR.K Oxidation (M)  |
| 198 - 203   | 770.5005  | 769.4932  | 769.3759  | 152 | 0    | R.VFYGER.S                     |
| 222 - 233   | 1426.8158 | 1425.8085 | 1425.6809 | 89  | 0    | K.LYDNSAMENLLK.S Oxidation (M) |
| 243 - 250   | 921.5810  | 920.5738  | 920.4967  | 84  | 0    | R.ASQFDLLK.A                   |
| 306 - 316   | 1297.8189 | 1296.8116 | 1296.6938 | 91  | 1    | R.RLVEEWAPAAR.N                |
| 307 - 316   | 1141.7309 | 1140.7236 | 1140.5927 | 115 | 0    | R.LVEEWAPAAR.N                 |
| 356 - 369   | 1519.9419 | 1518.9346 | 1518.7678 | 110 | 0    | R.TSKPEIFPASTDAR.Y             |

Spot No.: **92**

Mascot score: **84**    Sequence coverage %: **23**

NCBI accession No.: **gi| 116057683**

Matched peptides No.: **20**

Total peptides No.: **89**

Calculated Mr: **99984**

Calculated pI: **6.39**

### Annotated PMF spectra:

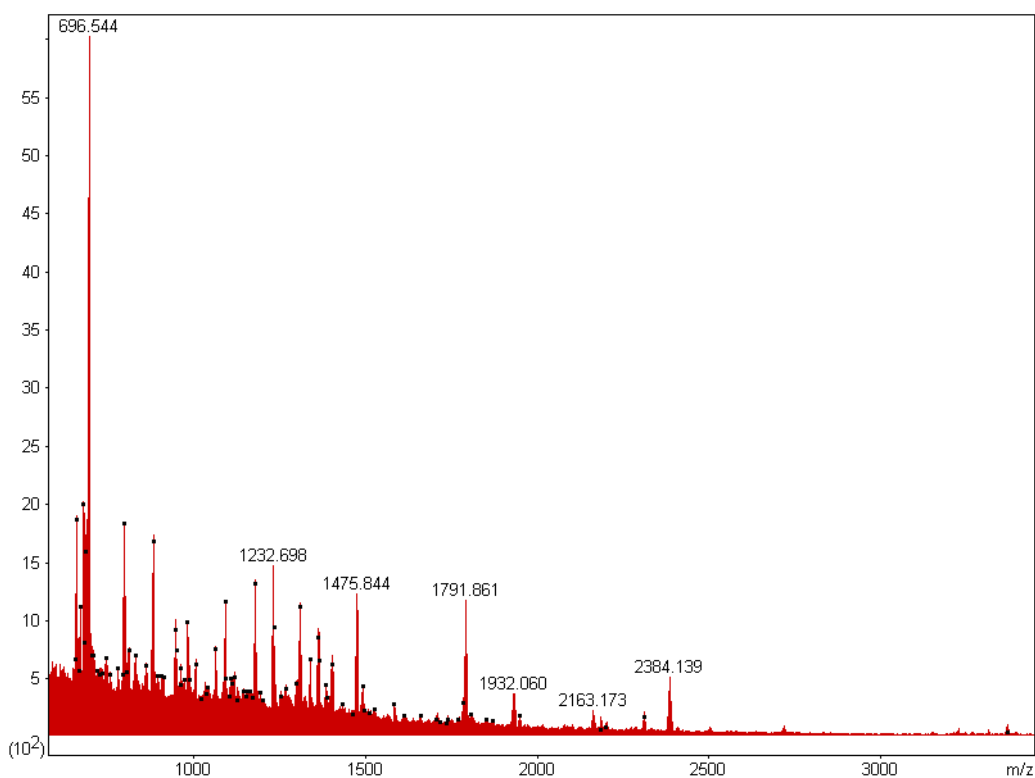

### Probability Based Mowse Score:

Protein score is  $-10 \cdot \log(P)$ , where P is the probability that the observed match is a random event. Protein scores greater than 72 are significant ( $p < 0.05$ ).

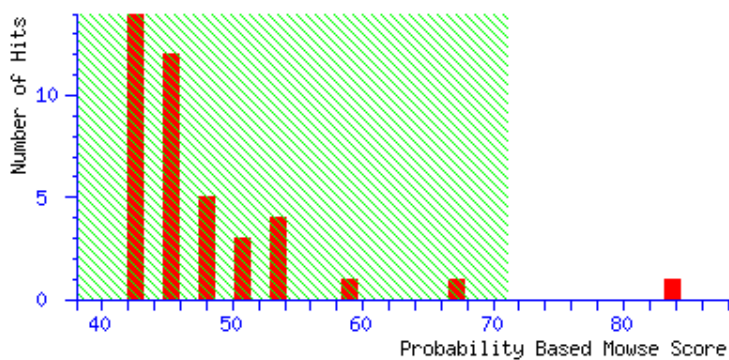



## Matched peptide sequences: shown in **Bold Red**

```

1 MSASTAARGV AAPRARASLA NSLAPPKLAR AHARASPRVA RAVTSSSDGA
51 DGASSSSPSP RRVARRVPRG DGDGAKASAS GSEAKASAPK VRKVRKL5AA
101 VKEGGEIEAV AQSCLFASSS VVGTADELIE TALREETSTK DGGESAGERL
151 KRLFKERRER GMGMVRDRFN DGGAVKDEYS DASFGADSEE YVEEMLESAA
201 EVEEQNKRLR EGYSESEFGV SNSIDPFKLV AGEFVVHRKY GIGQYLGLKV
251 LPVDQPNGDT KNKPFLEFLKY QDATAKISPE ASRRLLYRFC SPGALVKPPK
301 LNKLKDSTTW DLREKKTEAT IRRLVVNQMV IYLQRLQTIR NPYELPPAES
351 VEAFDKSFPY KLTPDQVRAV EDITIDLSRD APMDRLVIGD VGFGKTEVAM
401 RAIFHVASSG GGVFMMAPT VLAKQHAANL AARFRPLGIN VELVTRHVVK
451 SRHTEIFEKF KEGTVQIIVG THKLVNLDSE YYRKLKLLVI DEEQRFQVKH
501 KDQISALKAE VDVLTLSATP IPRTLHMAMS GFRDASLVQT PPPERRPINT
551 ILAPQNDADI TRAIHELNR NGQVYYIVPR VSMKEASER LNRLPELRI
601 MTCHGQMDGD QIDDAMEAFS SGTADVLIAT TIVESGLDIP NCNTIIENL
651 RGRVGRAGRQ AYAYMFYSSD ESELTPAAQE RLAALEECCG LGEFRLSER
701 DMGIRGVGTM FGEKQSGDVD NVGADLYLEL LYKQLQRIDN LRIKTIAASD
751 VRVETAGYEF GITPFYIATT QANDEVKAAI DSITVHEHIH AMLKLLQDTF
801 GEPDEFSLSC LFAEMQILA GDLGIKAILL DYPKDPPIID LITDASLMVK
851 ELLVEGTNGA YDVKINDNGI RFKTMTDMTM HGKVMYVVSI LRQITSSIPS
901 FVKYL

```

## Matched peptides information:

| Start - End | Observed  | Mr(expt)  | Mr(calc)  | ppm | Miss | Sequence                           |
|-------------|-----------|-----------|-----------|-----|------|------------------------------------|
| 9 - 16      | 797.4802  | 796.4729  | 796.4668  | 8   | 1    | R.GVAAPRAR.A                       |
| 28 - 34     | 794.4985  | 793.4912  | 793.4671  | 30  | 1    | K.LARAHAR.A                        |
| 86 - 92     | 728.4917  | 727.4844  | 727.4341  | 69  | 1    | K.ASAPKVR.K                        |
| 141 - 151   | 1118.5996 | 1117.5923 | 1117.5363 | 50  | 1    | K.DGGESAGERLK.R                    |
| 161 - 166   | 666.3402  | 665.3330  | 665.2989  | 51  | 0    | R.GMGMVR.D Oxidation (M)           |
| 229 - 239   | 1254.6949 | 1253.6876 | 1253.7244 | -29 | 1    | K.LVAGEFVVHRK.Y                    |
| 240 - 249   | 1111.6308 | 1110.6235 | 1110.6073 | 15  | 0    | K.YGIGQYLGLK.V                     |
| 262 - 269   | 1006.5569 | 1005.5496 | 1005.6011 | -51 | 0    | K.NKPFLEFLK.Y                      |
| 289 - 300   | 1300.6732 | 1299.6659 | 1299.7009 | -27 | 0    | R.FCSPGALVKPPK.L                   |
| 324 - 335   | 1475.8439 | 1474.8366 | 1474.8330 | 2   | 0    | R.LVVNQMVIYLQR.L                   |
| 386 - 401   | 1707.8720 | 1706.8647 | 1706.9026 | -22 | 1    | R.LVIGDVGFQKTEVAMR.A Oxidation (M) |
| 425 - 433   | 951.5634  | 950.5562  | 950.5046  | 54  | 0    | K.QHAANLAAR.F                      |
| 434 - 446   | 1513.8298 | 1512.8225 | 1512.8776 | -36 | 0    | R.FRPLGINVELVTR.H                  |
| 571 - 585   | 1784.9581 | 1783.9508 | 1783.9113 | 22  | 1    | R.NGQVYYIVPRVSMK.E                 |
| 591 - 599   | 1157.6698 | 1156.6625 | 1156.6716 | -8  | 1    | R.LNRLPELRI.I                      |
| 697 - 705   | 1092.6072 | 1091.5999 | 1091.5393 | 56  | 1    | R.LSERDMGIR.G Oxidation (M)        |
| 701 - 714   | 1497.8172 | 1496.8099 | 1496.7116 | 66  | 1    | R.DMGIRGVGTMFGEK.Q                 |
| 815 - 834   | 2201.1440 | 2200.1367 | 2200.2177 | -37 | 1    | R.EMQILAGDLGIKAILLDYK.D            |
| 835 - 850   | 1740.8823 | 1739.8750 | 1739.9379 | -36 | 0    | K.DPPIIDLITDASLMVK.E               |
| 884 - 892   | 1095.6100 | 1094.6027 | 1094.6158 | -12 | 0    | K.VMYVVSILR.Q Oxidation (M)        |

Spot No.: **93**

Mascot score: **177** Sequence coverage %: **33**

NCBI accession No.: **gi| 15232704**

Matched peptides No.: **13**

Total peptides No.: **20**

Calculated Mr: **52824**

Calculated pI: **7.60**

### Annotated PMF spectra:

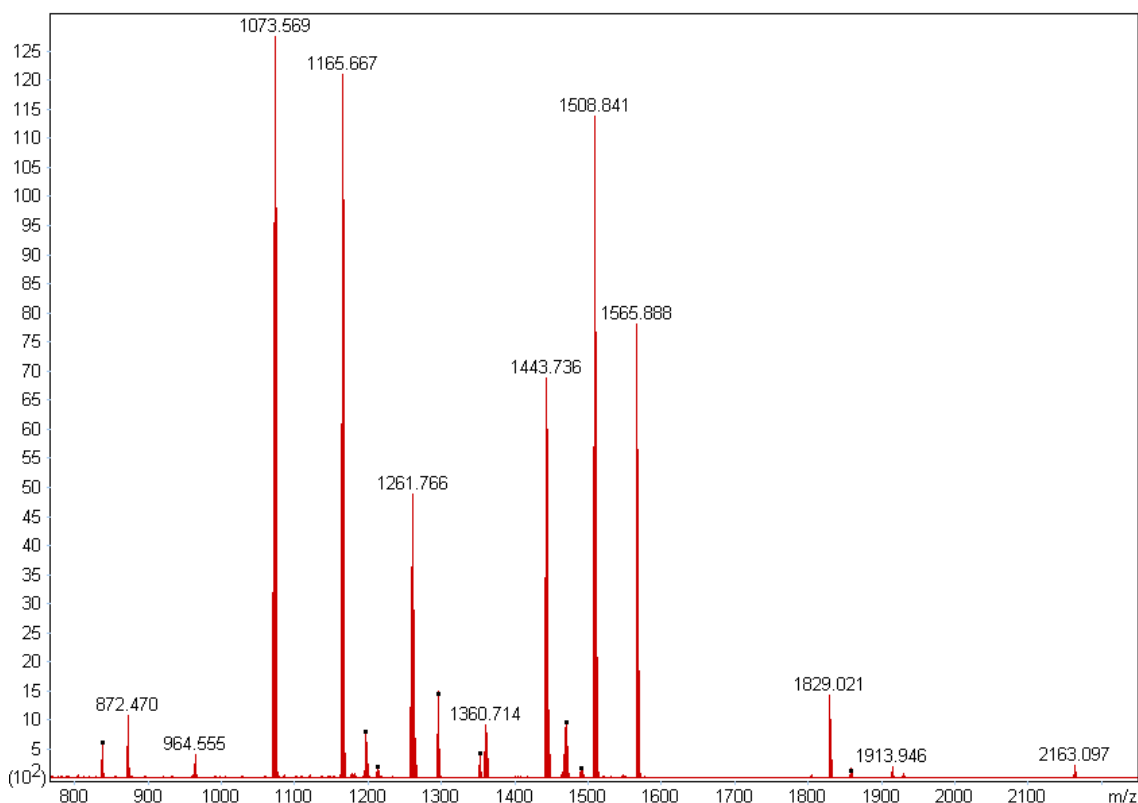

### Probability Based Mowse Score:

Protein score is  $-10 \cdot \log(P)$ , where P is the probability that the observed match is a random event. Protein scores greater than 72 are significant ( $p < 0.05$ ).

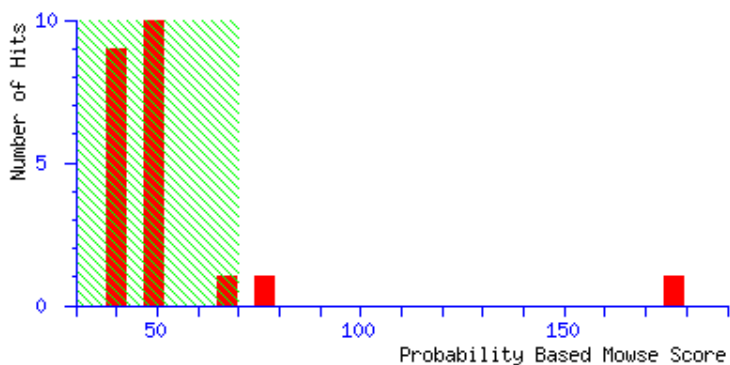

## Matched peptide sequences: shown in **Bold Red**

```

1 MALASTTLPA KTGLSLWCPT SPSLARRLPA RFSPIGSRIA SRGVVTASFA
51 NENREFVIIG GGNAAGYAAR TFVENGMDG RLCIVTKEAY APYERPALK
101 AYLFPPEKKP ARLPGFHTCV GGGGERQTPD WYKEKGIEMI YEDPVTGADF
151 EKQTLTTNTG KQLKYGSLII ATGCTASRFP DKIGGNLPGV HYIREVADAD
201 SLISLLGKSK KVVIVGGGYI GMEVAAAAVA WNLDTTIVFP EDQLLQRLFT
251 PSLAQRYEEL YRQNGVKFVK GASINNLEAG SDGRVTAVKL ADGSTIEADT
301 VVIGIGAKPA IGPFETLSMN KSIGGIQVDG LFRTSTPGIF AIGDVAAFPL
351 KIYDRMTRVE HVDHARRSAQ HCVKSLTTAH TDTYDYLPFY YSRVFEYEGS
401 SRKVWWQFYG DNVGETVEVG NFDPKIATFW IDSGRLKGVL VESGSPEEFQ
451 LLPKLARSQP IVDKAKLASA SSVEEAIEIA QAALQS

```

## Matched peptides information:

| Start - End | Observed  | Mr(expt)  | Mr(calc)  | ppm | Miss | Sequence              |
|-------------|-----------|-----------|-----------|-----|------|-----------------------|
| 55 - 70     | 1565.8882 | 1564.8809 | 1564.7998 | 52  | 0    | R.EFVIIGGGNAAGYAAR.T  |
| 88 - 100    | 1508.8410 | 1507.8337 | 1507.7670 | 44  | 0    | K.EAYAPYERPALK.A      |
| 101 - 108   | 964.5550  | 963.5477  | 963.5065  | 43  | 0    | K.AYLFPEK.K           |
| 113 - 126   | 1443.7356 | 1442.7283 | 1442.6725 | 39  | 0    | R.LPGFHTCVGGGGER.Q    |
| 136 - 152   | 1913.9457 | 1912.9384 | 1912.8764 | 32  | 0    | K.GIEMIYEDPVTGADFEK.Q |
| 165 - 178   | 1469.8005 | 1468.7932 | 1468.7344 | 40  | 0    | K.YGSLIATGCTASR.F     |
| 183 - 194   | 1295.8038 | 1294.7965 | 1294.7146 | 63  | 0    | K.IGGNLPGVHYIR.E      |
| 257 - 262   | 872.4697  | 871.4625  | 871.4075  | 63  | 0    | R.YEELYR.Q            |
| 271 - 284   | 1360.7141 | 1359.7068 | 1359.6378 | 51  | 0    | K.GASINNLEAGSDGR.V    |
| 322 - 333   | 1261.7661 | 1260.7588 | 1260.6826 | 60  | 0    | K.SIGGIQVDGLFR.T      |
| 394 - 402   | 1073.5694 | 1072.5621 | 1072.4825 | 74  | 0    | R.VFEYEGSSR.K         |
| 426 - 435   | 1165.6674 | 1164.6601 | 1164.5928 | 58  | 0    | K.IATFWIDSGR.L        |
| 438 - 454   | 1829.0214 | 1828.0141 | 1827.9618 | 29  | 0    | K.GVLVESGSPEEFQLLPK.L |

Spot No.: **94**

Mascot score: **170**    Sequence coverage %: **24**

NCBI accession No.: **gi| 15383744**

Matched peptides No.: **18**

Total peptides No.: **24**

Calculated Mr: **62192**

Calculated pI: **6.26**

### Annotated PMF spectra:

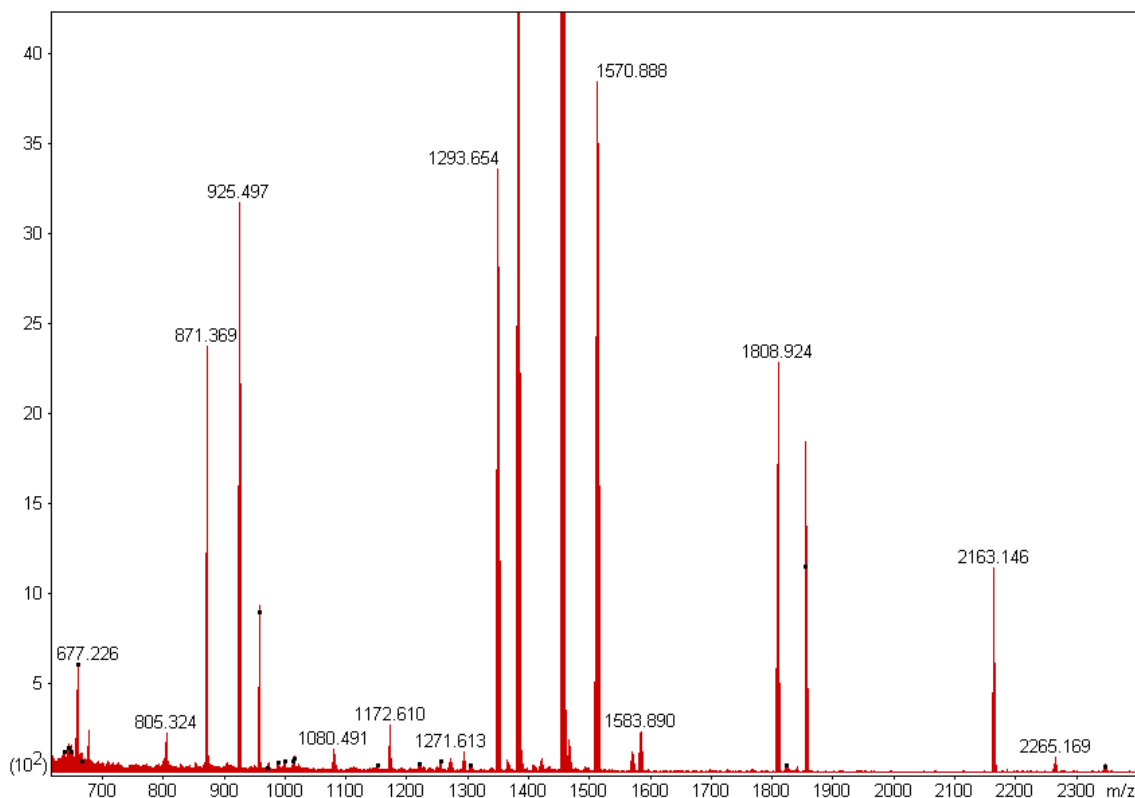

### Probability Based Mowse Score:

Protein score is  $-10 \cdot \log(P)$ , where P is the probability that the observed match is a random event. Protein scores greater than 72 are significant ( $p < 0.05$ ).

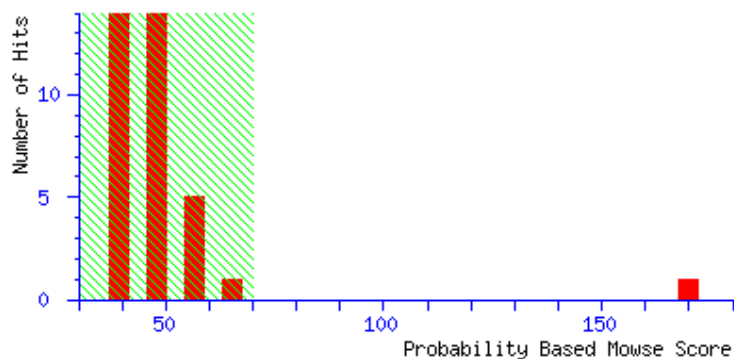

Matched peptide sequences: shown in **Bold Red**

```

1 MYRVFASRAL RAKSLCDKSS TSLASLTLR LNHSIPFATV DAEELSGSHP
51 AEVQSFVQGK WIGSSNHNTL LDPLNGEPFI KVAEVDSEGT QPFVDSLSQC
101 PKHGLHNPFK SPERYLLYGD ISTKAAHMLA LPKVADFFAR LIQRVAPKSY
151 QQAAGEVFTV RKFLNFCGD QVRFLARSFA IPGNHLGQQS HGYRWPYGVP
201 TIVTFNFPL EIPLLQLMGA LYMGNKPLLK VDSKVSIVME QMMRLLHYCG
251 LPAEDVDFIN SDGKTMNKIL LEANPRMTLF TGSSRVAEKL ALDLKGRIRL
301 EDAGFDWKVL GPDVQEVYV AWQCDQDAYA CSGQKCSAQS MLFVHENWSK
351 TPLVSKLKEK AERRKLEDLT IGPVLTFTTE AMLEHMENLL QIPGSKLLFG
401 GKELKNHSIP SIYGALEPTA VYVPIEEILK DNKTYELVTK EIFGPFQIVT
451 EYKQDQLPLV LDALERMHAH LTAAVVSNPD IFLQEVIGNS VNGTTYAGLR
501 GRTTGAPQNH WFGPAGDPRG AGIGTPEAIK LWWSCHREVI YDYGVPVQGW
551 ELPPST

```

Matched peptides information:

| Start - End | Observed  | Mr(expt)  | Mr(calc)  | ppm | Miss | Sequence                                |
|-------------|-----------|-----------|-----------|-----|------|-----------------------------------------|
| 115 - 124   | 1172.6099 | 1171.6026 | 1171.6125 | -8  | 0    | R.YLLYGD <b>ISTK</b> .A                 |
| 149 - 161   | 1455.7871 | 1454.7798 | 1454.7154 | 44  | 0    | K.SY <b>QQAAGEVFTV</b> TR.K             |
| 149 - 162   | 1583.8900 | 1582.8827 | 1582.8103 | 46  | 1    | K.SY <b>QQAAGEVFTV</b> TRK.F            |
| 162 - 173   | 1512.8063 | 1511.7990 | 1511.7191 | 53  | 1    | R. <b>KFLNF</b> CGD <b>QVR</b> .F       |
| 163 - 173   | 1384.6953 | 1383.6880 | 1383.6241 | 46  | 0    | K. <b>FLENF</b> CGD <b>QVR</b> .F       |
| 235 - 244   | 1255.5955 | 1254.5882 | 1254.5770 | 9   | 0    | K. <b>VSIVMEQMMR</b> .L 2 Oxidation (M) |
| 235 - 244   | 1271.6134 | 1270.6061 | 1270.5720 | 27  | 0    | K. <b>VSIVMEQMMR</b> .L 3 Oxidation (M) |
| 269 - 276   | 925.4969  | 924.4896  | 924.5392  | -54 | 0    | K. <b>ILLEANPR</b> .M                   |
| 277 - 285   | 999.4640  | 998.4567  | 998.4855  | -29 | 0    | R. <b>MTLFTGSSR</b> .V                  |
| 277 - 285   | 1015.4631 | 1014.4558 | 1014.4804 | -24 | 0    | R. <b>MTLFTGSSR</b> .V Oxidation (M)    |
| 298 - 308   | 1349.7172 | 1348.7099 | 1348.6775 | 24  | 1    | R. <b>IRLEDAGFDW</b> K.V                |
| 300 - 308   | 1080.4911 | 1079.4838 | 1079.4924 | -8  | 0    | R. <b>LEDAGFDW</b> K.V                  |
| 441 - 453   | 1570.8880 | 1569.8807 | 1569.8079 | 46  | 0    | K. <b>EIFGPFQIVTEYK</b> .K              |
| 454 - 466   | 1509.9186 | 1508.9113 | 1508.8562 | 37  | 1    | K. <b>KDQLPLVLDALER</b> .M              |
| 455 - 466   | 1381.8024 | 1380.7951 | 1380.7613 | 25  | 0    | K. <b>DQLPLVLDALER</b> .M               |
| 503 - 519   | 1808.9243 | 1807.9170 | 1807.8391 | 43  | 0    | R. <b>TGAPQNHWF</b> GPAGDPR.G           |
| 520 - 530   | 1013.5194 | 1012.5121 | 1012.5553 | -43 | 0    | R. <b>GAGIGTPEAIK</b> .L                |
| 531 - 537   | 957.4330  | 956.4258  | 956.4651  | -41 | 0    | K. <b>LWWSCHR</b> .E                    |

Spot No.: **95**

Mascot score: **82**      Sequence coverage %: **18**

NCBI accession No.: **gi| 18394801**

Matched peptides No.: **9**      Total peptides No.: **14**

Calculated Mr: **53718**      Calculated pI: **6.15**

### Annotated PMF spectra:

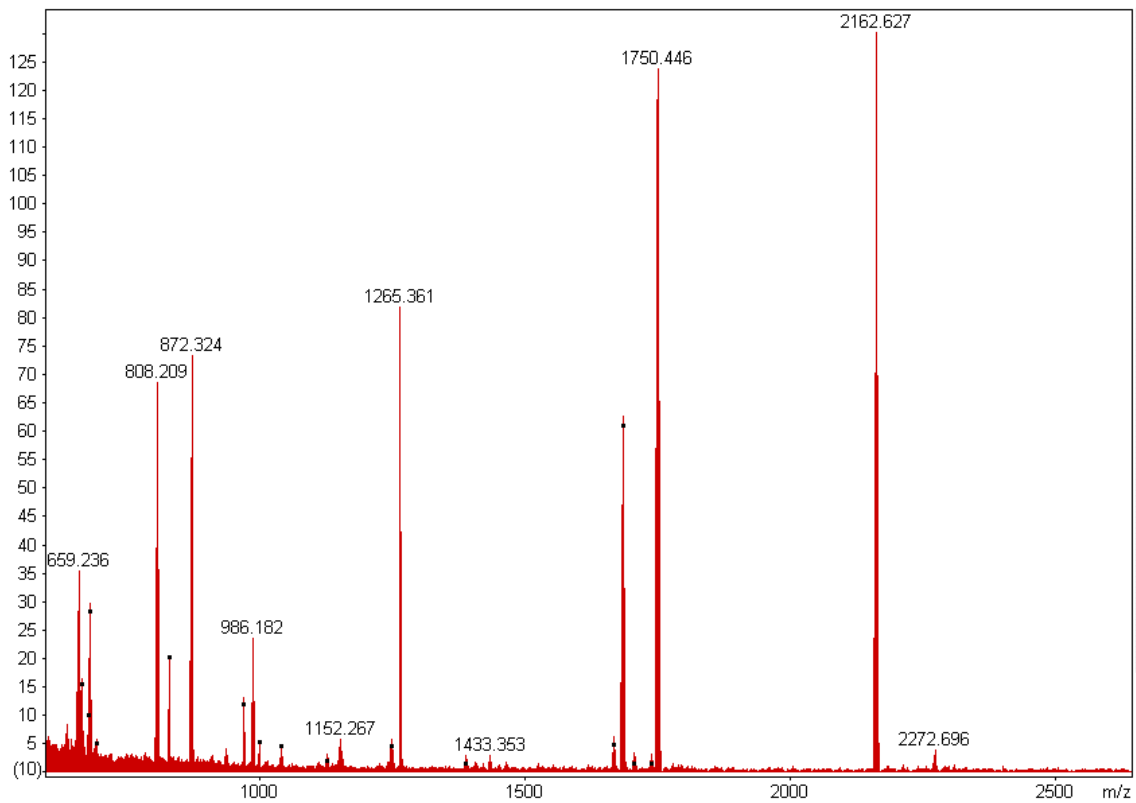

### Probability Based Mowse Score:

Protein score is  $-10 \cdot \log(P)$ , where P is the probability that the observed match is a random event. Protein scores greater than 72 are significant ( $p < 0.05$ ).

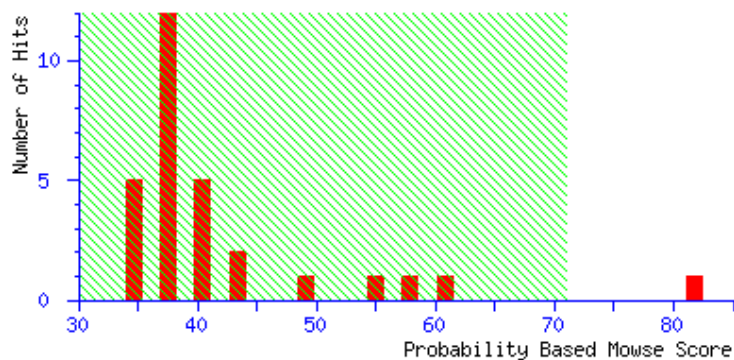

## Matched peptide sequences: shown in **Bold Red**

```

1 MSLMIRSSYV SHITLFQPRN SKPSSFTNQI SFLSSSNMNP FLNLVYKRNL
51 TMQSVSKMTV KSSLIDPDGG ELVELIVPET EIGVKKAESE TMPKVKLNQI
101 DLEWVHWISE GWASPLKGF REDEYLQSLH FNSLRKNGT FVMSLP IVL
151 AIDDDTKEQI GSSENVAVLC PQGDIIGSLR SVEIYKHNKE ERIARTWGT
201 SPGLPYVEEY ITPSGNWLIG GDLEVFEPK YNDGLDHYR SPKQLREEFD
251 NRQADAVFAF QLRNPVHNGH ALLMNDTRKR LLEMGYKNPV LLLHPLGGFT
301 KADDVPLDVR MEQHSKVLED GVLDPKTTIV SIFSPMHYA GPTEVQWHAK
351 ARINAGANFY IVGRDPAGMG HPTEKRDLYD PDHGKRVLSM APGLEKLNIL
401 PFRVAAYDTI EKKMAFFDPS RAKEFLFISG TKMRTYARTG ENPPDGFMC
451 SGWNVLVKYY ESQSEAKQ QAVVSA

```

## Matched peptides information:

| Start - End | Observed  | Mr(expt)  | Mr(calc)  | ppm  | Miss | Sequence                   |
|-------------|-----------|-----------|-----------|------|------|----------------------------|
| 122 - 135   | 1750.4456 | 1749.4383 | 1749.8322 | -225 | 0    | R.EDEYLQSLHFNSLR.L         |
| 138 - 157   | 2162.6274 | 2161.6201 | 2162.0929 | -219 | 0    | K.NGTFVMSLP IVLAIDDDTK.E   |
| 231 - 239   | 1152.2667 | 1151.2594 | 1151.4996 | -209 | 0    | K.YNDGLDHYR.L              |
| 253 - 263   | 1265.3612 | 1264.3539 | 1264.6564 | -239 | 0    | R.QADAVFAFQLR.N            |
| 302 - 310   | 999.2843  | 998.2771  | 998.5033  | -227 | 0    | K.ADDVPLDVR.M              |
| 397 - 403   | 872.3244  | 871.3172  | 871.5280  | -242 | 0    | K.LNILPFR.V                |
| 414 - 421   | 970.1961  | 969.1888  | 969.4378  | -257 | 0    | K.MAFFDPSR.A               |
| 414 - 421   | 986.1825  | 985.1752  | 985.4328  | -261 | 0    | K.MAFFDPSR.A Oxidation (M) |
| 424 - 432   | 1041.2897 | 1040.2824 | 1040.5542 | -261 | 0    | K.EFLFISGTK.M              |

Spot No.: **96**

Mascot score: **253**    Sequence coverage %: **33**

NCBI accession No.: **gi| 125857763**

Matched peptides No.: **22**

Total peptides No.: **36**

Calculated Mr: **48871**

Calculated pI: **6.13**

### Annotated PMF spectra:

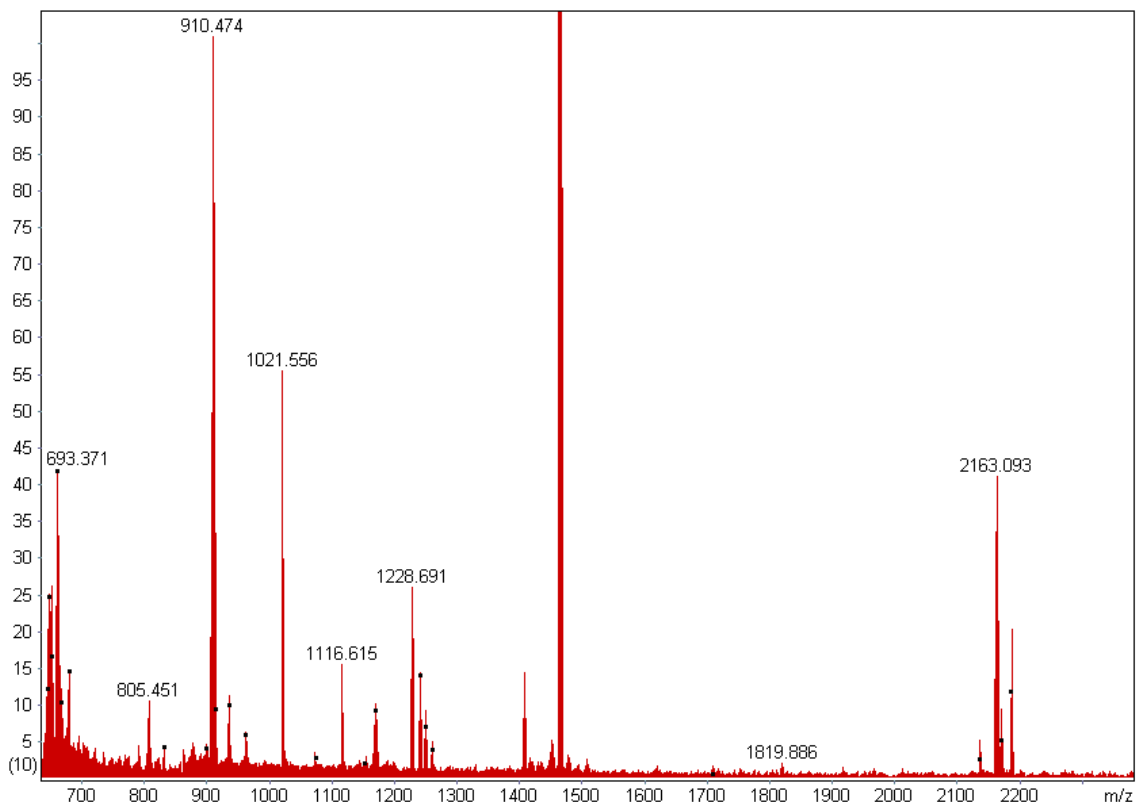

### Probability Based Mowse Score:

Protein score is  $-10 \cdot \log(P)$ , where P is the probability that the observed match is a random event. Protein scores greater than 72 are significant ( $p < 0.05$ ).

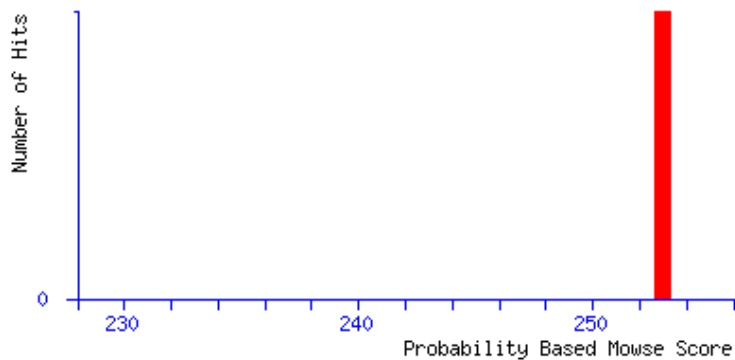



Matched peptide sequences: shown in **Bold Red**

**1 VGFKAGVKEY KLTYYPPEYE TKDIDLAAF RVTPQPGVPP EEAGAAVAEE**  
**51 SSTGTWTTVW TDGLTSLDRY KGRCYHIEPV LGEETQFIAY VAYPLDLFEE**  
**101 GSVTNMFTSI VGNVFGFKAL AALRLEDLRI PPAYTKTFQG PPHGIQVERD**  
**151 KLNKYGRPLL GCTIKPKLGL SAKNYGRAVY ECLRGGLDFT KDDENVNSQP**  
**201 FMRWRDRFLF CAEAIYKSQA ETGEIKGHYL NATAGTCEEM IKRAVFAREL**  
**251 GVPIVMHDYL TGGFTANTSL AHYCRDNGLL LHIHRAMHAV IDRQKNHGMH**  
**301 FRVLAKALRL SGGDHIHAGT VVGKLEGDRE STLGFVDLLR DDYVEKDRSR**  
**351 GIFFTQDWVS LPGVLPVAVS GIHVWHMPAL TEIFGDDSVL QFGGGTLGHP**  
**401 WGNAPGAVAN RVALEACVQA RNEGRDLAVE GNEIIREAC**

Matched peptides information:

| Start - End | Observed  | Mr(expt)  | Mr(calc)  | ppm | Miss | Sequence                             |
|-------------|-----------|-----------|-----------|-----|------|--------------------------------------|
| 1 - 8       | 805.4515  | 804.4442  | 804.4858  | -52 | 1    | -.VGFKAGVK.E                         |
| 12 - 22     | 1407.7014 | 1406.6941 | 1406.6605 | 24  | 0    | K.LTYYPPEYETK.D                      |
| 23 - 31     | 1021.5563 | 1020.5490 | 1020.5240 | 25  | 0    | K.DIDLAAFR.V                         |
| 119 - 124   | 614.4116  | 613.4043  | 613.3911  | 22  | 0    | K.ALAALR.L                           |
| 119 - 129   | 1240.7704 | 1239.7631 | 1239.7299 | 27  | 1    | K.ALAALRLEDLR.I                      |
| 125 - 129   | 645.3688  | 644.3615  | 644.3493  | 19  | 0    | R.LEDLR.I                            |
| 137 - 149   | 1465.7924 | 1464.7851 | 1464.7474 | 26  | 0    | K.TFQGPPHGIQVER.D                    |
| 137 - 151   | 1708.9547 | 1707.9474 | 1707.8693 | 46  | 1    | K.TFQGPPHGIQVERDK.L                  |
| 178 - 184   | 910.4741  | 909.4668  | 909.4378  | 32  | 0    | R.AVYECLR.G                          |
| 185 - 203   | 2170.0168 | 2169.0095 | 2168.9797 | 14  | 1    | R.GGLDFTKDDENVNSQPFR.W               |
| 185 - 203   | 2186.0581 | 2185.0508 | 2184.9746 | 35  | 1    | R.GGLDFTKDDENVNSQPFR.W Oxidation (M) |
| 192 - 203   | 1451.6736 | 1450.6663 | 1450.6147 | 36  | 0    | K.DDENVNSQPFR.W                      |
| 204 - 207   | 632.3552  | 631.3479  | 631.3190  | 46  | 1    | R.WRDR.F                             |
| 208 - 217   | 1261.6560 | 1260.6487 | 1260.6213 | 22  | 0    | R.FLFCAEAIYK.S                       |
| 218 - 226   | 962.5187  | 961.5115  | 961.4716  | 41  | 0    | K.SQAETGEIK.G                        |
| 294 - 302   | 1170.6700 | 1169.6627 | 1169.5512 | 95  | 1    | R.QKNHGMHFR.V Oxidation (M)          |
| 296 - 302   | 898.4362  | 897.4289  | 897.4028  | 29  | 0    | K.NHGMHFR.V                          |
| 296 - 302   | 914.4400  | 913.4327  | 913.3977  | 38  | 0    | K.NHGMHFR.V Oxidation (M)            |
| 325 - 340   | 1819.8855 | 1818.8782 | 1818.9476 | -38 | 1    | K.LEGDRESTLGFVDLLR.D                 |
| 330 - 340   | 1249.7580 | 1248.7507 | 1248.6714 | 64  | 0    | R.ESTLGFVDLLR.D                      |
| 412 - 421   | 1116.6145 | 1115.6072 | 1115.5757 | 28  | 0    | R.VALEACVQAR.N                       |
| 426 - 436   | 1228.6912 | 1227.6839 | 1227.6459 | 31  | 0    | R.DLAVEGNEIIR.E                      |

Spot No.: **97**

Mascot score: **88**

Sequence coverage %: **32**

NCBI accession No.: **gi| 308810769**

Matched peptides No.: **24**

Total peptides No.: **130**

Calculated Mr: **77406**

Calculated pI: **6.47**

### Annotated PMF spectra:

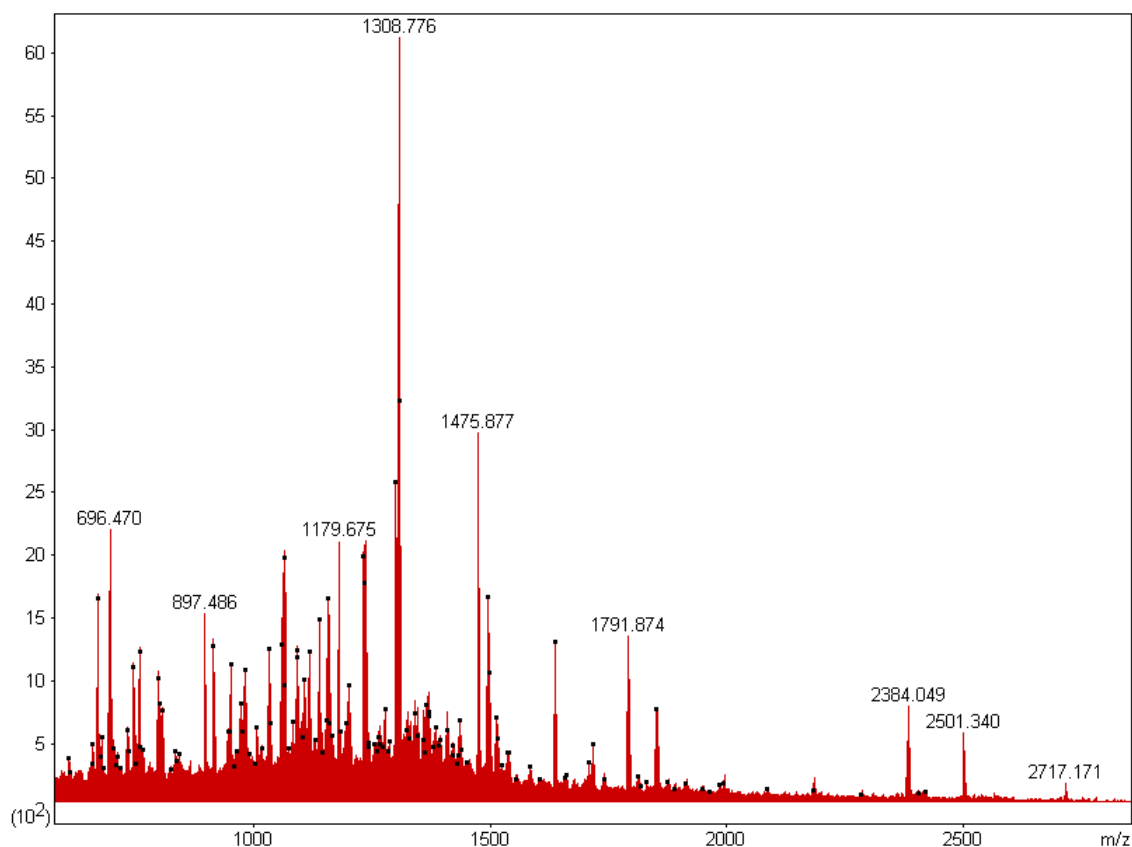

### Probability Based Mowse Score:

Protein score is  $-10 \cdot \log(P)$ , where P is the probability that the observed match is a random event. Protein scores greater than 72 are significant ( $p < 0.05$ ).

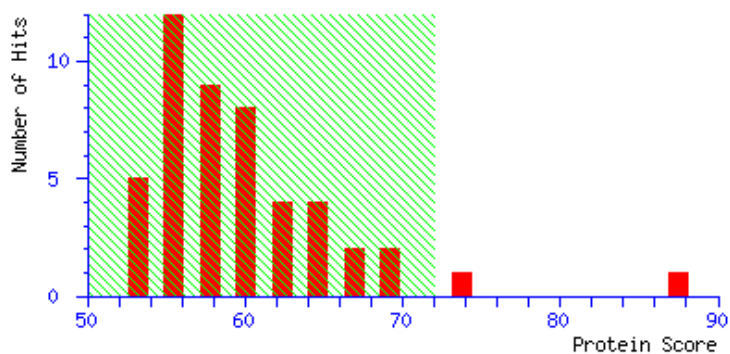

## Matched peptide sequences: shown in **Bold Red**

```

1  MHFNADLDR LDELAVLPPQ SLAQIPTLRK IHARLRDANC PDVLTQACVD
51 ERDFHAPPCA ADVDRLEHIF DACARGGTPS AATHYAEVC GDSQATSDDA
101 TEAYVRDGRG VLDWVEKSLR RAESTLDAGG GREESAEACA RTLDACARAA
151 EALGADASGK GAIGGSEETK RLQKVRDAVV CRELHDAGGR HGGPAAWAGA
201 VQRRRAATSP GDDLGRLLA GVGEHRPAYP FKSIAEAAKS IFVDGSAGPA
251 ALLAKRCLFL YFLDLSGLPH DGSPMEYARR ARIHPRLYQE TRAAVLLDDF
301 ESEAAALDEAC EILPRVAHPL LPVKFIASLA NRQRPTTALM VSRARGALTS
351 SPNAETMSLE VSIRLACGLI SEAFLCVRDA FNAFPELRES KAGTHLVRLL
401 LDHGVEKLCL EQVLALPFND ATEKLLDLL WDRREDIPVE FGIVYLLNRG
451 RPLEAAGLFS RARNEGRLVD ERAGKLEARL QECLARLPIP QKALVADIGG
501 ALFADAAIPR DLVVDRANDG DLNKTANAMA LADEKREFQA VLRGKPGTEG
551 EIPFLKPPVE LAQKARASSL DQATSMLASA SILGSPGRPL TFVRPHEPSD
601 APSSPATMLP TTKSGLKVEP STPYASPFGA IPVRRPAHAD ASTTTTTPKP
651 SAPGSLLFQA QRPLTGKSSF PAFLSPTPRK ATRAWTTDRP TPGSTATQAS
701 PARRSSRLAD RTADA

```

## Matched peptides information:

| Start - End | Observed  | Mr (expt) | Mr (calc) | ppm  | Miss | Sequence                                 |
|-------------|-----------|-----------|-----------|------|------|------------------------------------------|
| 1 - 9       | 1118.5814 | 1117.5741 | 1117.4975 | 69   | 0    | - .MHFNADLDR.A                           |
| 31 - 36     | 765.3798  | 764.3725  | 764.4769  | -137 | 1    | K.IHARLR.D                               |
| 122 - 132   | 1033.5762 | 1032.5689 | 1032.4836 | 83   | 0    | R.AESTLDAGGGR.E                          |
| 161 - 170   | 948.4999  | 947.4926  | 947.4560  | 39   | 0    | K.GAIGGSEETK.R                           |
| 191 - 203   | 1277.7617 | 1276.7544 | 1276.6425 | 88   | 0    | R.HGGPAAWAGAVQR.R                        |
| 218 - 226   | 951.5317  | 950.5244  | 950.5298  | -6   | 0    | R.LLAGVGEHR.P                            |
| 227 - 239   | 1392.7297 | 1391.7224 | 1391.7449 | -16  | 1    | R.PAYPFKSIAEAAK.S                        |
| 257 - 279   | 2717.1714 | 2716.1641 | 2716.2665 | -38  | 0    | R.CFLYFLDLSGLPHDGSPMEYAR.R Oxidation (M) |
| 281 - 286   | 749.4131  | 748.4058  | 748.4456  | -53  | 1    | R.ARIHPR.L                               |
| 316 - 324   | 973.5649  | 972.5577  | 972.6120  | -56  | 0    | R.VAHPLLPVK.F                            |
| 333 - 343   | 1259.7181 | 1258.7108 | 1258.6816 | 23   | 1    | R.QRPTTALMVSR.A                          |
| 379 - 388   | 1179.6747 | 1178.6674 | 1178.5720 | 81   | 0    | R.DAFNAFPELR.E                           |
| 379 - 391   | 1523.8760 | 1522.8687 | 1522.7416 | 83   | 1    | R.DAFNAFPELRESK.A                        |
| 450 - 461   | 1273.6411 | 1272.6338 | 1272.6938 | -47  | 1    | R.GRPLEAAGLFSR.A                         |
| 452 - 461   | 1060.6193 | 1059.6120 | 1059.5713 | 38   | 0    | R.PLEAAGLFSR.A                           |
| 452 - 463   | 1287.7025 | 1286.6952 | 1286.7095 | -11  | 1    | R.PLEAAGLFSRAR.N                         |
| 493 - 510   | 1740.8828 | 1739.8755 | 1739.9570 | -47  | 0    | K.ALVADIGGALFADAAIPR.D                   |
| 589 - 594   | 732.3413  | 731.3340  | 731.4330  | -135 | 0    | R.PLTFVR.P                               |
| 635 - 649   | 1584.8513 | 1583.8440 | 1583.7726 | 45   | 1    | R.RPAHADASTTTTTPK.P                      |
| 636 - 649   | 1428.7810 | 1427.7737 | 1427.6715 | 72   | 0    | R.PAHADASTTTTTPK.P                       |
| 650 - 662   | 1300.6471 | 1299.6398 | 1299.6935 | -41  | 0    | K.PSAPGSLLFQAQR.P                        |
| 668 - 680   | 1434.8375 | 1433.8302 | 1433.7667 | 44   | 1    | K.SSPAFLSPTPRK.A                         |
| 690 - 704   | 1497.8699 | 1496.8626 | 1496.7695 | 62   | 1    | R.PTPGSTATQASARR.S                       |
| 708 - 715   | 832.5164  | 831.5091  | 831.4086  | 121  | 1    | R.LADRTADA.-                             |

Spot No.: **98**

Mascot score: **96**    Sequence coverage %: **24**

NCBI accession No.: **gi| 226461739**

Matched peptides No.: **48**

Total peptides No.: **111**

Calculated Mr: **188682**

Calculated pI: **6.11**

### Annotated PMF spectra:

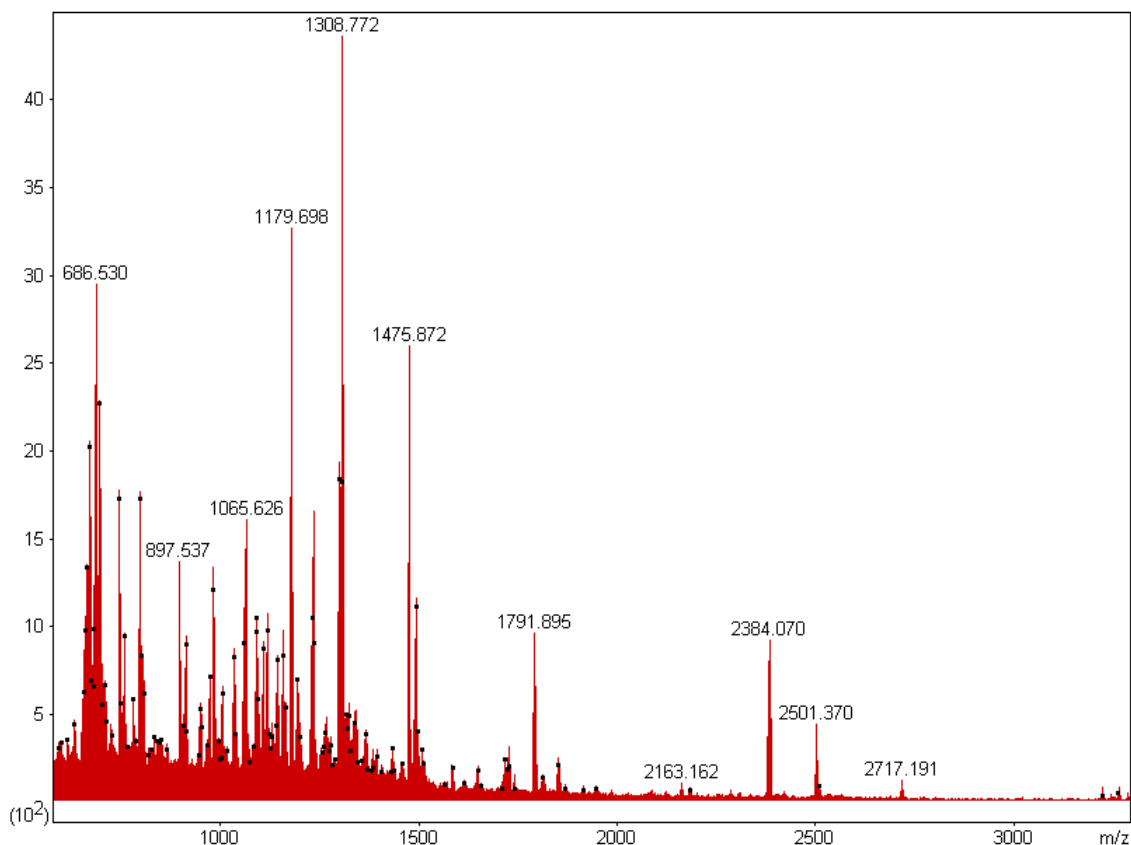

### Probability Based Mowse Score:

Protein score is  $-10 \cdot \log(P)$ , where P is the probability that the observed match is a random event. Protein scores greater than 72 are significant ( $p < 0.05$ ).

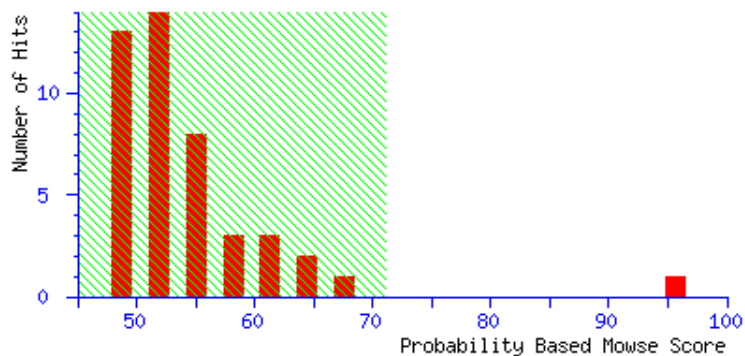

## Matched peptide sequences: shown in **Bold Red**

| Start - End | Observed  | Mr(expt)  | Mr(calc)  | ppm | Miss | Sequence                        |
|-------------|-----------|-----------|-----------|-----|------|---------------------------------|
| 107 - 114   | 851.5387  | 850.5314  | 850.4773  | 64  | 1    | R.RAPPSPAR.R                    |
| 214 - 221   | 982.5710  | 981.5637  | 981.4992  | 66  | 1    | R.EHDARLNK.E                    |
| 318 - 325   | 897.5373  | 896.5300  | 896.4464  | 93  | 1    | K.AEHDAARK.A                    |
| 329 - 340   | 1357.7907 | 1356.7834 | 1356.6561 | 94  | 1    | K.AVAEGKYAEYEK.A                |
| 355 - 360   | 788.5358  | 787.5285  | 787.4188  | 139 | 1    | R.QLEKDR.R                      |
| 368 - 373   | 749.4843  | 748.4771  | 748.4232  | 72  | 1    | R.GEFKIR.V                      |
| 481 - 491   | 1157.6901 | 1156.6828 | 1156.6815 | 1   | 1    | K.LLISNAAKAEK.A                 |
| 489 - 499   | 1232.7175 | 1231.7102 | 1231.6044 | 86  | 1    | K.AEKALEEESAR.G                 |
| 500 - 508   | 905.5963  | 904.5890  | 904.4436  | 161 | 0    | R.GAAMLEAAR.E Oxidation (M)     |
| 514 - 519   | 703.4970  | 702.4897  | 702.3660  | 176 | 1    | R.EREAAK.L                      |
| 523 - 530   | 832.5813  | 831.5740  | 831.4338  | 169 | 0    | R.EETLAAAK.K                    |
| 532 - 541   | 1074.6208 | 1073.6135 | 1073.5353 | 73  | 1    | K.DLNDAEAAKK.A                  |
| 597 - 604   | 948.5482  | 947.5409  | 947.5474  | -7  | 0    | R.TVLMSLR.S Oxidation (M)       |
| 622 - 631   | 1257.7100 | 1256.7027 | 1256.6183 | 67  | 1    | R.VERAEMLEHK.A Oxidation (M)    |
| 625 - 634   | 1127.6301 | 1126.6228 | 1126.5804 | 38  | 1    | R.AEMLEHKA.K                    |
| 635 - 645   | 1287.7226 | 1286.7153 | 1286.6214 | 73  | 1    | K.ERAEQALEDAR.A                 |
| 646 - 656   | 1283.6743 | 1282.6670 | 1282.5897 | 60  | 1    | R.ASQEKMIEGMR.A 2 Oxidation (M) |
| 705 - 718   | 1493.8566 | 1492.8493 | 1492.7997 | 33  | 1    | K.HLEEKLAQNAAK.K                |
| 711 - 719   | 914.6360  | 913.6287  | 913.5345  | 103 | 1    | K.LAQNAAAK.V                    |
| 736 - 745   | 1179.6976 | 1178.6903 | 1178.6594 | 26  | 1    | R.FRTVLMGSLR.S                  |
| 760 - 768   | 1165.6768 | 1164.6695 | 1164.5193 | 129 | 1    | K.MERTEQSER.L                   |
| 763 - 773   | 1273.6830 | 1272.6757 | 1272.7037 | -22 | 1    | R.TEQSERLALVK.E                 |
| 787 - 797   | 1234.7109 | 1233.7036 | 1233.6135 | 73  | 1    | R.KANQETVAAMR.S Oxidation (M)   |
| 788 - 797   | 1090.6347 | 1089.6274 | 1089.5237 | 95  | 0    | K.ANQETVAAMR.S                  |
| 817 - 821   | 631.4615  | 630.4543  | 630.3337  | 191 | 0    | K.QVQEK.Q                       |
| 822 - 828   | 819.5001  | 818.4928  | 818.4498  | 53  | 1    | K.QDSTIKK.L                     |
| 836 - 845   | 1130.6230 | 1129.6157 | 1129.6203 | -4  | 1    | K.QTNATLRAQK.Q                  |
| 877 - 886   | 1201.7128 | 1200.7055 | 1200.5995 | 88  | 1    | R.FKTVMGSLR.A 2 Oxidation (M)   |
| 929 - 940   | 1316.6892 | 1315.6819 | 1315.6732 | 7   | 1    | R.AQEDAVASLREK.Q                |
| 960 - 971   | 1265.6931 | 1264.6858 | 1264.6663 | 15  | 0    | K.ASTYAEQLAAIK.R                |
| 983 - 994   | 1406.7643 | 1405.7570 | 1405.6209 | 97  | 0    | R.EEELDSTADIER.R                |
| 1030 - 1038 | 1092.6257 | 1091.6184 | 1091.5182 | 92  | 1    | R.KSFEHASHR.N                   |
| 1053 - 1064 | 1307.7696 | 1306.7623 | 1306.6265 | 104 | 1    | K.ADEAQKAYQGAR.A                |
| 1115 - 1119 | 659.5092  | 658.5019  | 658.3762  | 191 | 1    | R.KEINR.L                       |
| 1180 - 1192 | 1393.8231 | 1392.8158 | 1392.6667 | 107 | 1    | K.TNAAMSDRESLAK.E               |
| 1206 - 1220 | 1513.9040 | 1512.8967 | 1512.7532 | 95  | 0    | R.QAAALVANSPESEER.K             |
| 1281 - 1291 | 1262.7144 | 1261.7071 | 1261.5422 | 131 | 0    | K.NDEVTDDEDVAR.A                |
| 1347 - 1353 | 847.5462  | 846.5390  | 846.4997  | 46  | 1    | R.CKTLVVK.G                     |
| 1354 - 1360 | 686.5301  | 685.5229  | 685.4235  | 145 | 1    | K.GKAALAR.I                     |
| 1361 - 1375 | 1584.8403 | 1583.8330 | 1583.8770 | -28 | 0    | R.IVALELEVELASAVNEK.E           |
| 1419 - 1431 | 1345.7831 | 1344.7758 | 1344.6409 | 100 | 0    | R.STEAEDVDPIAAK.A               |
| 1446 - 1460 | 1431.8134 | 1430.8061 | 1430.7365 | 49  | 0    | R.DAAAASATTIAETAR.E             |
| 1446 - 1462 | 1716.9930 | 1715.9857 | 1715.8802 | 62  | 1    | R.DAAAASATTIAETARER.D           |
| 1468 - 1474 | 865.5161  | 864.5088  | 864.4341  | 86  | 0    | R.ELVGYER.R                     |
| 1495 - 1501 | 745.5429  | 744.5356  | 744.4204  | 155 | 0    | R.LGMTPVK.A                     |
| 1579 - 1588 | 1006.5610 | 1005.5537 | 1005.4879 | 65  | 0    | R.SDAFATAAPR.F                  |
| 1616 - 1623 | 945.5937  | 944.5864  | 944.5403  | 49  | 1    | K.LDLSRVSR.S                    |
| 1621 - 1629 | 1016.6325 | 1015.6252 | 1015.5047 | 119 | 1    | R.VSRSPGEER.D                   |

Spot No.: **99**

Mascot score: **92** Sequence coverage %: **20**

NCBI accession No.: **gi| 15232704**

Matched peptides No.: **10**

Total peptides No.: **22**

Calculated Mr: **52304**

Calculated pI: **7.11**

### Annotated PMF spectra:

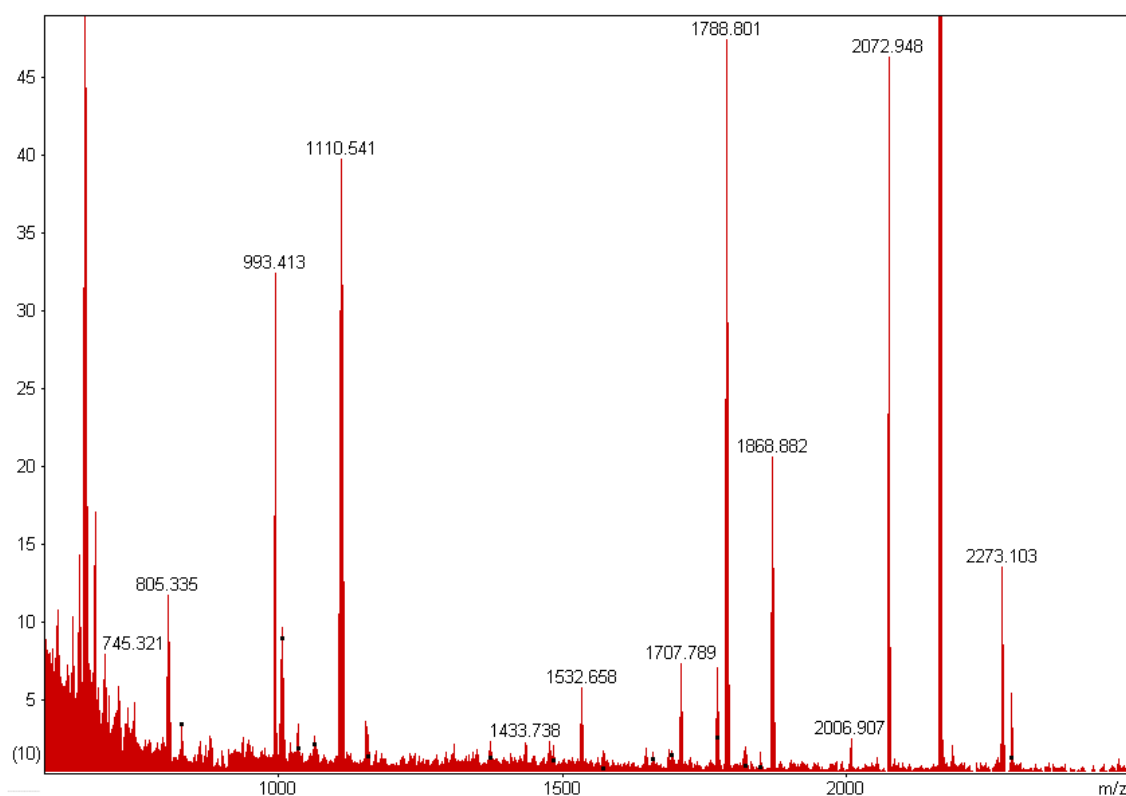

### Probability Based Mowse Score:

Protein score is  $-10 \cdot \log(P)$ , where P is the probability that the observed match is a random event. Protein scores greater than 72 are significant ( $p < 0.05$ ).

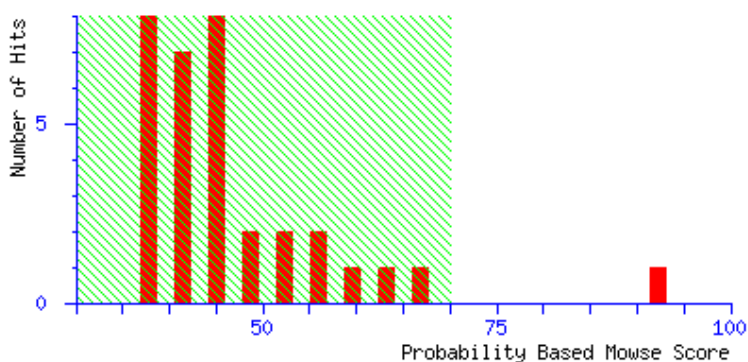

## Matched peptide sequences: shown in **Bold Red**

```

 1 MLSSSTSAGL SSSFVSSRFL SSGIFSSGAS RNRVTFPVQF HRASAVRCFA
 51 SSGGSDRIQV QNPVEMDGD EMTRVIWSMI KEKLILPYLD LDIKYFDLGI
101 LNRDATDDKV TVESAEAAALK YNVAIKCATI TPDEGRVKEF GLKSMWRSPN
151 GTIRNILDGT VFREPIMCSN IPRLVPGWEK PICIGRHAFG DQYRATDVTI
201 KGPGLKLMVF EDGNAPVELD VYDFKGPGVA LAMYNVDESI RAFAESSMAM
251 ALTKKWPLYL STKNTILKKY DGRFKDIFQE VYEANWKQKF EEHSIWYEHR
301 LIDDMVAYAV KSEGGYVWAC KNYDGDVQSD LLAQGFGLG LMTSVLLSAD
351 GKTLESEAAH GTVTRHFR LH QKQETSTNS IASIFAWTRG LEHRAKLDKN
401 EKLMDFVKKL ESSCVNTVET GKMTKDLALL IHGPKVSRDL FLNTEEFIDA
451 VASKLKTKQFK ELPLV

```

## Matched peptides information:

| Start - End | Observed  | Mr(expt)  | Mr(calc)  | ppm | Miss | Sequence              |               |
|-------------|-----------|-----------|-----------|-----|------|-----------------------|---------------|
| 95 - 103    | 1110.5406 | 1109.5333 | 1109.5869 | -48 | 0    | K.YFDLGILNR.D         |               |
| 155 - 163   | 1034.5375 | 1033.5302 | 1033.5556 | -25 | 0    | R.NILDGTVER.E         |               |
| 187 - 194   | 993.4127  | 992.4054  | 992.4464  | -41 | 0    | R.HAFGDQYR.A          |               |
| 226 - 241   | 1691.8977 | 1690.8904 | 1690.8348 | 33  | 0    | K.GPGVALAMYNVDESIR.A  |               |
| 226 - 241   | 1707.7885 | 1706.7812 | 1706.8298 | -28 | 0    | K.GPGVALAMYNVDESIR.A  | Oxidation (M) |
| 288 - 300   | 1788.8014 | 1787.7941 | 1787.8379 | -25 | 1    | K.QKFEHSIWYEHR.L      |               |
| 290 - 300   | 1532.6580 | 1531.6507 | 1531.6844 | -22 | 0    | K.FEHSIWYEHR.L        |               |
| 312 - 321   | 1156.5251 | 1155.5178 | 1155.5019 | 14  | 0    | K.SEGGYVWACK.N        |               |
| 353 - 365   | 1371.7262 | 1370.7189 | 1370.6790 | 29  | 0    | K.TLESEAAHGTVTR.H     |               |
| 373 - 389   | 1868.8818 | 1867.8745 | 1867.9064 | -17 | 0    | K.QQETSTNSIASIFAWTR.G |               |

Spot No.: **100**

Mascot score: **97**

Sequence coverage %: **31**

NCBI accession No.: **gi| 312281543**

Matched peptides No.: **11**

Total peptides No.: **32**

Calculated Mr: **50983**

Calculated pI: **6.67**

### Annotated PMF spectra:

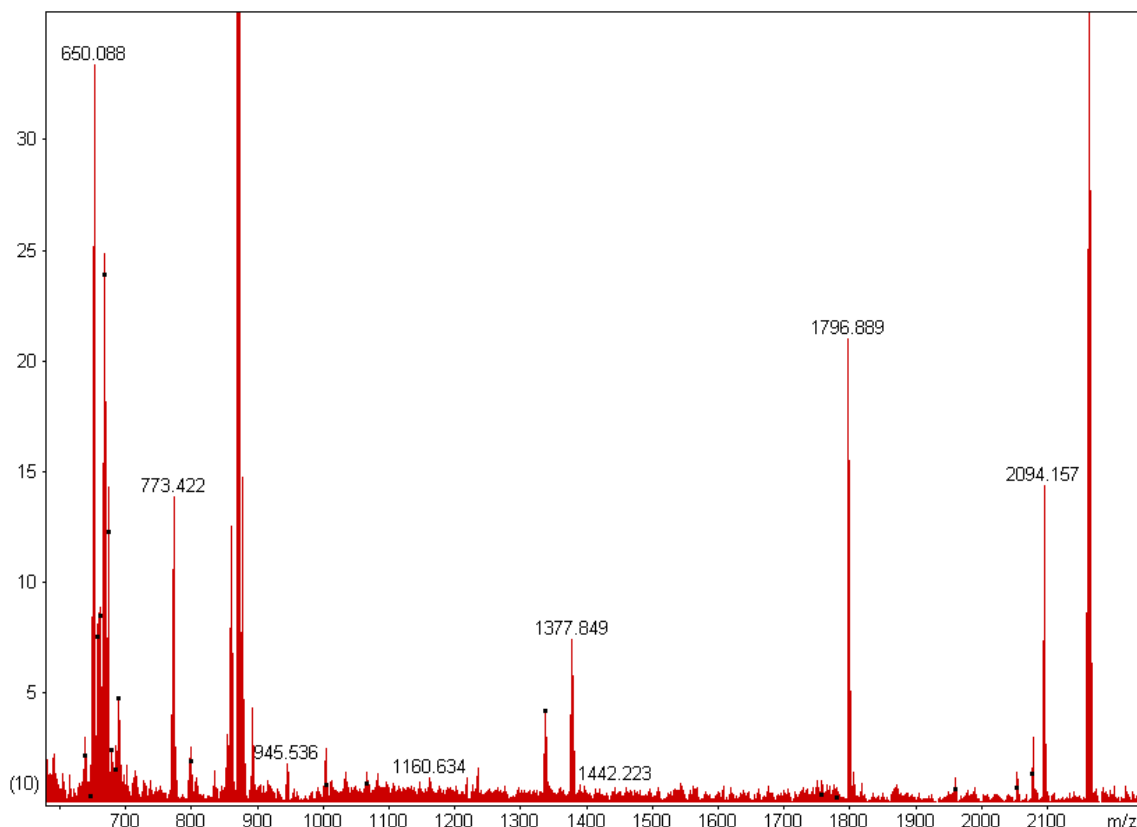

### Probability Based Mowse Score:

Protein score is  $-10 \cdot \log(P)$ , where P is the probability that the observed match is a random event. Protein scores greater than 72 are significant ( $p < 0.05$ ).

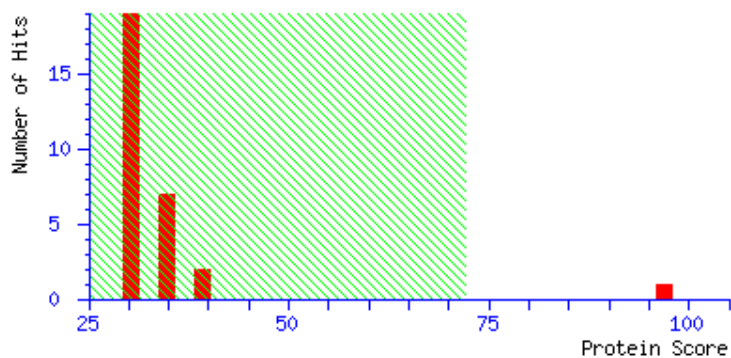



Matched peptide sequences: shown in **Bold Red**

```

1 MSSTHQLTSS LISSSSSTFL APSNFNRRAR NGCLPMAKRV NTCKCVATPQ
51 EKIEYKTNVS RNSNMSKLQA GYLFPPEIARR RSAHLLKYPD AQUIISLGIGD
101 TTEPIPEVIT SAIAEKAHEL STIEGYSGYG PEQGAKPLRA AIAKTFYSGL
151 GIGDDDIFVS DGAKCDISRL QVMFGSKVTI AVQDPSYPAY VDSSVIMGQT
201 GQFNIDVQKY GNIEYMKCTP ENGFFPDLST VGRTDIIFFC SPNNPTGAAA
251 TREQLKQLVE FAKKNGSIIV YDSAYAMYMS DDNPRSIFEI PGAEVAMET
301 ASFSKYYAGFT GVRLGWTVIP KQLLYSDGFP VAKDFNRIIC TCFNGASNLS
351 QAGALACLTP EGLEAMHKVI GFYKENTNII IDTFTSLGYD VYGGKNAPYV
401 WVHFPNQSSW DVFAEILEKT HVVTPGSGF GPGGEGFVRV SAFGHRENIL
451 EACRRFKQLY K

```

Matched peptides information:

| Start - End | Observed  | Mr (expt) | Mr (calc) | ppm | Miss | Sequence                 |
|-------------|-----------|-----------|-----------|-----|------|--------------------------|
| 68 - 79     | 1377.8489 | 1376.8416 | 1376.7452 | 70  | 0    | K.LQAGYLFPEIAR.R         |
| 117 - 136   | 2094.1568 | 2093.1495 | 2092.9701 | 86  | 0    | K.AHELSTIEGYSGYGPEQGAK.P |
| 145 - 164   | 2077.0959 | 2076.0886 | 2075.9688 | 58  | 0    | K.TFYSGLGIGDDDIFVSDGAK.C |
| 218 - 233   | 1796.8889 | 1795.8816 | 1795.8200 | 34  | 0    | K.CTPENGFFPDLSTVGR.T     |
| 234 - 252   | 2053.1050 | 2052.0977 | 2051.9735 | 61  | 0    | R.TDIIFFCSPNNPTGAAATR.E  |
| 306 - 313   | 870.4710  | 869.4637  | 869.4396  | 28  | 0    | K.YAGFTGVR.L             |
| 322 - 333   | 1337.7687 | 1336.7614 | 1336.7027 | 44  | 0    | K.QLLYSDGFPVAK.D         |
| 420 - 439   | 1959.0586 | 1958.0513 | 1957.9647 | 44  | 0    | K.THVVTPGSGFGPGGEGFVR.V  |
| 440 - 446   | 773.4222  | 772.4149  | 772.3980  | 22  | 0    | R.VSAFGHR.E              |
| 447 - 454   | 1004.5606 | 1003.5533 | 1003.4756 | 77  | 0    | R.ENILEACR.R             |
| 447 - 455   | 1160.6340 | 1159.6267 | 1159.5768 | 43  | 1    | R.ENILEACRR.F            |

Spot No.: **101**

Mascot score: **90**    Sequence coverage %: **24**

NCBI accession No.: **gi| 297807495**

Matched peptides No.: **13**

Total peptides No.: **41**

Calculated Mr: **42647**

Calculated pI: **7.64**

### Annotated PMF spectra:

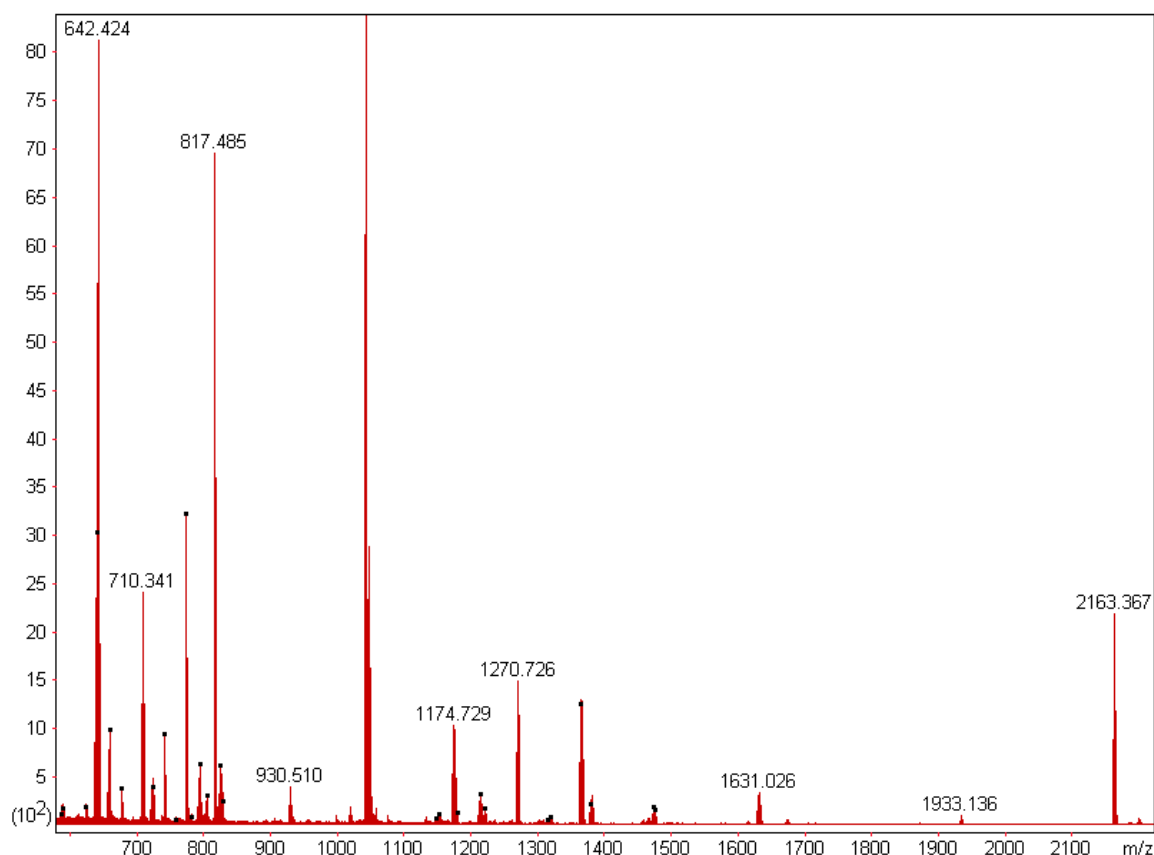

### Probability Based Mowse Score:

Protein score is  $-10 \cdot \log(P)$ , where P is the probability that the observed match is a random event. Protein scores greater than 72 are significant ( $p < 0.05$ ).

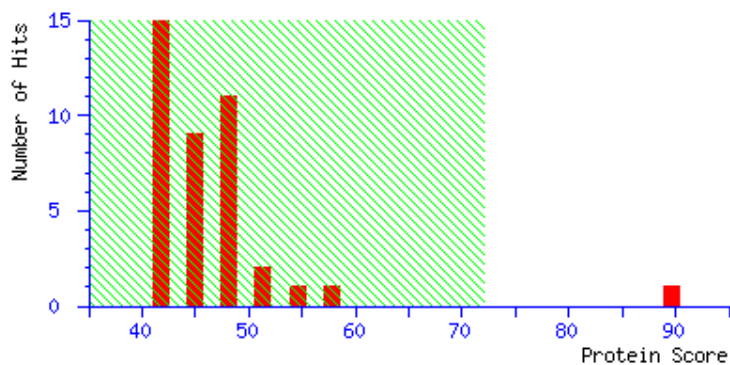

Matched peptide sequences: shown in **Bold Red**

```

1 MAMRQATKAA IRACVSSSSS GYFARRQFNA SSGDSKKIVG VFYKANEYAT
51 KNPNFLGCVE NALGIRDWLE SQGHQYIVTD DKEGPDCELE KHIPDLHVLI
101 STPFHPAYVT AERIKKAKNL KLLLTAGIGS DHIDLQAAAA AGLTVAEVTG
151 SNVVSVAEDE LMRILILMRN FVPGYNQVVK GEWNVAGIAY RAYDLEGTI
201 GTVGAGRIGK LLLQRLKPFK CNLLYHDLRQ MAPELEKEIG AKFVEDLNEM
251 LPKCDVVVIN MPLTEKTRGM FNKELIGKLG KGLVIVNNAR GAIMDRQAVV
301 EAVESGHIGG YSGDVWDPQP APKDHPWRYM PNQAMPHTS GTTIDAQLRY
351 AAGTKDMLER YFKGEDFPAQ NYIVKDGELA PQYR

```

Matched peptides information:

| Start - End | Observed  | Mr (expt) | Mr (calc) | ppm | Miss | Sequence                      |
|-------------|-----------|-----------|-----------|-----|------|-------------------------------|
| 2 - 8       | 805.4180  | 804.4107  | 804.4276  | -21 | 1    | M.AMRQATK.A                   |
| 38 - 44     | 825.4944  | 824.4872  | 824.4796  | 9   | 0    | K.IVGVFYK.A                   |
| 83 - 91     | 1076.5447 | 1075.5374 | 1075.4492 | 82  | 0    | K.EGPDCELEK.H                 |
| 164 - 169   | 758.4226  | 757.4153  | 757.4884  | -96 | 0    | R.ILILMR.N                    |
| 164 - 169   | 774.4913  | 773.4841  | 773.4833  | 1   | 0    | R.ILILMR.N Oxidation (M)      |
| 192 - 198   | 795.3877  | 794.3804  | 794.3810  | -1  | 0    | R.AYDLEGT.T                   |
| 211 - 215   | 642.4243  | 641.4170  | 641.4224  | -8  | 0    | K.LLLQR.L                     |
| 229 - 237   | 1058.5791 | 1057.5718 | 1057.5477 | 23  | 0    | R.LQMAPELEK.E                 |
| 291 - 296   | 678.3009  | 677.2937  | 677.3166  | -34 | 0    | R.GAIMDR.Q Oxidation (M)      |
| 324 - 328   | 710.3415  | 709.3342  | 709.3296  | 6   | 0    | K.DHPWR.Y                     |
| 350 - 360   | 1270.7262 | 1269.7189 | 1269.6023 | 92  | 1    | R.YAAGTKDMLER.Y Oxidation (M) |
| 364 - 375   | 1380.8021 | 1379.7948 | 1379.6721 | 89  | 0    | K.GEDFPAQNYIVK.D              |
| 376 - 384   | 1048.5862 | 1047.5789 | 1047.4985 | 77  | 0    | K.DGELAPQYR.-                 |

Spot No.: **102**

Mascot score: **87** Sequence coverage %: **41**

NCBI accession No.: **gi| 255611315**

Matched peptides No.: **17**

Total peptides No.: **82**

Calculated Mr: **37517**

Calculated pI: **7.64**

### Annotated PMF spectra:

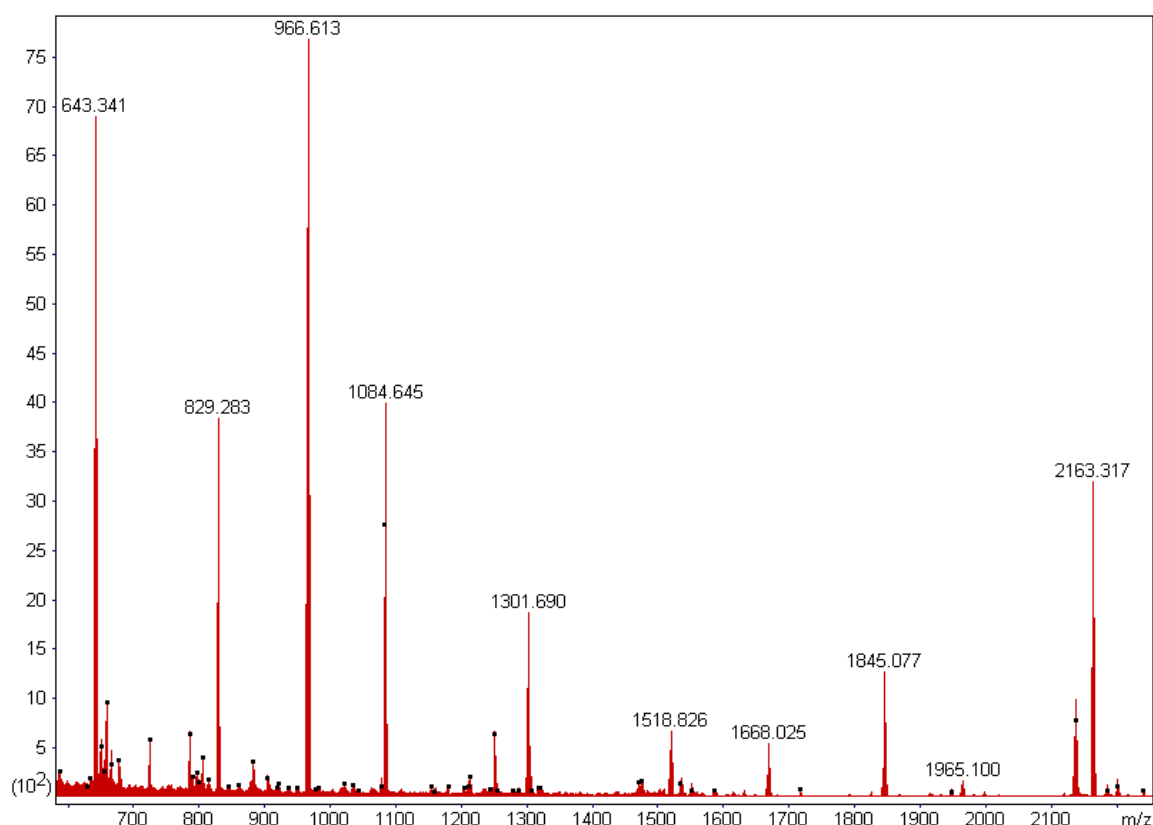

### Probability Based Mowse Score:

Protein score is  $-10 \cdot \log(P)$ , where P is the probability that the observed match is a random event. Protein scores greater than 72 are significant ( $p < 0.05$ ).

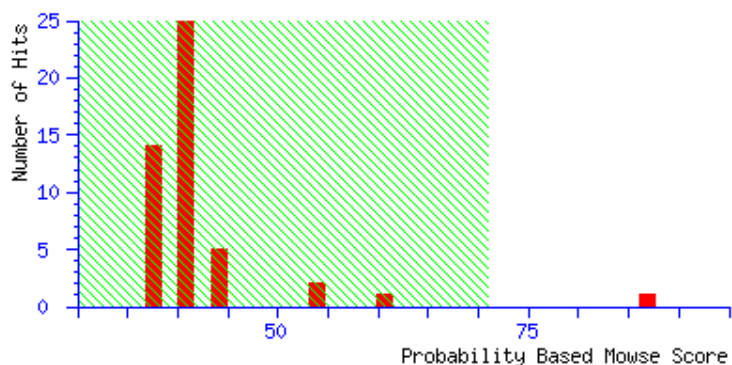

Matched peptide sequences: shown in **Bold Red**

```

1 MLVQYTRPAP CRLNAVGRAA QIGEQHADVV SFAVERDDRW RADAQREQRL
51 HGGCLCVHEL HGVALLGGFA RAIDDGDFPF VACFGQLCNR AVAIAAFDLL
101 DEQFLRGFVE MHGRCKLFAP ARFHARREMV DEMRAAIAA AQMKRQEGSV
151 GGPADTERLG HDAVEVGGRD HALAHQIDAF AENRRLQAIC DESVDFLAYF
201 QRTLAERAIE VERSVQDQAG CLRIRHHLDE RQQMRRIERM PDETAGRLH
251 LAGLNRSNA RTGRKEQAMR RRGPFDCPE SGLEVGAFA VLLNEIRVGN
301 GVGKIGLERE LLKCGAHVVA ERLQSRHGLC H

```

Matched peptides information:

| Start - End | Observed  | Mr(expt)  | Mr(calc)  | ppm | Miss Sequence                    |
|-------------|-----------|-----------|-----------|-----|----------------------------------|
| 1 - 12      | 1491.8564 | 1490.8491 | 1490.7486 | 67  | 0 -.MLVQYTRPAPCR.L               |
| 1 - 12      | 1507.8403 | 1506.8330 | 1506.7435 | 59  | 0 -.MLVQYTRPAPCR.L Oxidation (M) |
| 42 - 49     | 973.6154  | 972.6082  | 972.4737  | 138 | 1 R.ADAQREQR.L                   |
| 91 - 106    | 1791.8446 | 1790.8373 | 1790.9567 | -67 | 0 R.AVAIAAFDLLDEQFLR.G           |
| 91 - 114    | 2705.3165 | 2704.3092 | 2704.3795 | -26 | 1 R.AVAIAAFDLLDEQFLRGFVEMHGR.C   |
| 127 - 134   | 1065.6075 | 1064.6002 | 1064.4743 | 118 | 1 R.REMVDEMR.K                   |
| 128 - 135   | 1037.6078 | 1036.6005 | 1036.4681 | 128 | 1 R.EMVDEMRK.A                   |
| 145 - 158   | 1458.8265 | 1457.8192 | 1457.6859 | 91  | 1 K.RQEGSVGGPADTER.L             |
| 146 - 158   | 1302.7925 | 1301.7852 | 1301.5848 | 154 | 0 R.QEGSVGGPADTER.L              |
| 159 - 169   | 1109.5772 | 1108.5699 | 1108.5625 | 7   | 0 R.LGHDAVEVGGR.D                |
| 170 - 184   | 1707.8855 | 1706.8782 | 1706.8125 | 39  | 0 R.DHALAHQIDAFENR.R             |
| 214 - 223   | 1165.6717 | 1164.6644 | 1164.5016 | 140 | 0 R.SVDQAGCLR.I                  |
| 214 - 225   | 1434.8715 | 1433.8642 | 1433.6868 | 124 | 1 R.SVDQAGCLR.H                  |
| 224 - 231   | 1075.6494 | 1074.6421 | 1074.5683 | 69  | 1 R.IRHHLDER.Q                   |
| 226 - 235   | 1365.7514 | 1364.7441 | 1364.6367 | 79  | 1 R.HHLDERQQMR.R Oxidation (M)   |
| 237 - 248   | 1405.9420 | 1404.9347 | 1404.6303 | 217 | 1 R.IERMPDETAGR.L Oxidation (M)  |
| 323 - 331   | 1107.6242 | 1106.6169 | 1106.5403 | 69  | 1 R.LQSRHGLCH.-                  |

Spot No.: **103**

Mascot score: **83**    Sequence coverage %: **28**

NCBI accession No.: **gi| 22326744**

Matched peptides No.: **9**

Total peptides No.: **35**

Calculated Mr: **40647**

Calculated pI: **8.79**

### Annotated PMF spectra:

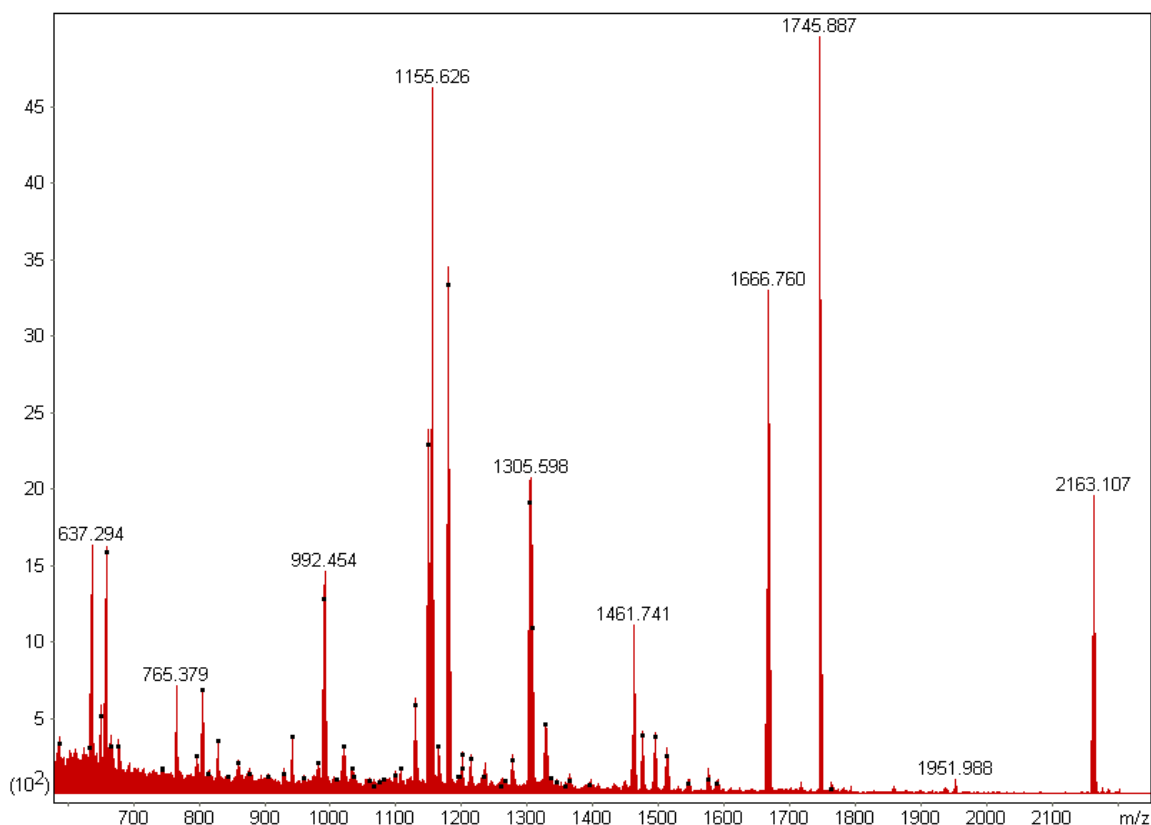

### Probability Based Mowse Score:

Protein score is  $-10 \cdot \log(P)$ , where P is the probability that the observed match is a random event. Protein scores greater than 72 are significant ( $p < 0.05$ ).

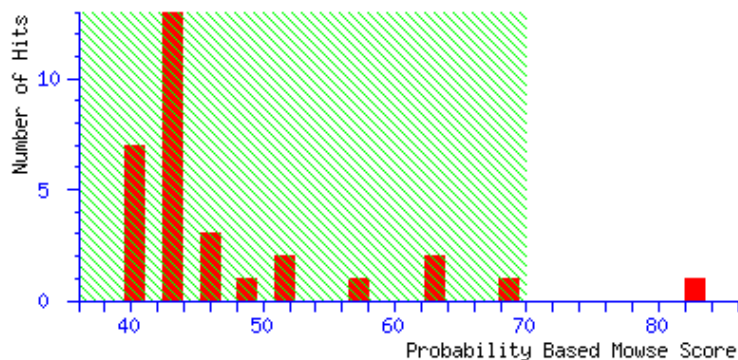

Matched peptide sequences: shown in **Bold Red**

```

1 MKSAISSSLF FNSKNLLNPN PLSRFISLKS NFLPKLSPRS ITSHTLKLPS
51 SSTSALRSIS SSMASFFNPE QARVPSALPL PAPPLTKFNI GLCQLSVTSD
101 KKRNIHAKK AIEEAASKGA KLVLLPEIWN SPYSNDSFPV YAEEDAGGD
151 ASPSTAMLSE VSKRLKITII GGSIPERVGD RLYNTCCVFG SDGELKAKHR
201 KIHLFDIDIP GKITFMESKT LTAGETPTIV DTDVGRIGIG ICYDIRFQEL
251 AMIYAARGAH LLCYPGAFNM TTGPLHWELL QRARATDNQL YVATCSPARD
301 SGAGYTAWGH STLVGPFGEV LATTEHEEAI IIAEIDYSIL EQRRTSPLPLN
351 RQRRGDLYQL VDVQRLDSK

```

Matched peptides information:

| Start - End | Observed  | Mr(expt)  | Mr(calc)  | ppm | Miss | Sequence                      |
|-------------|-----------|-----------|-----------|-----|------|-------------------------------|
| 111 - 121   | 1074.4992 | 1073.4919 | 1073.5716 | -74 | 1    | K.AIEEAASKGAK.L               |
| 167 - 177   | 1155.6261 | 1154.6188 | 1154.6659 | -41 | 0    | K.ITIIGGSIPER.V               |
| 182 - 196   | 1762.7917 | 1761.7844 | 1761.7702 | 8   | 0    | R.LYNTCCVFGSDGELK.A           |
| 201 - 212   | 1395.7500 | 1394.7427 | 1394.7922 | -35 | 1    | R.KIHLFDIDIPGK.I              |
| 220 - 236   | 1745.8874 | 1744.8801 | 1744.8843 | -2  | 0    | K.TLTAGETPTIVDTDVGR.I         |
| 247 - 257   | 1328.6342 | 1327.6269 | 1327.6594 | -24 | 0    | R.FQELAMIYAAR.G Oxidation (M) |
| 285 - 299   | 1666.7603 | 1665.7530 | 1665.7781 | -15 | 0    | R.ATDNQLYVATCSPAR.D           |
| 354 - 365   | 1461.7407 | 1460.7334 | 1460.7736 | -27 | 1    | R.RGDLYQLVDVQR.L              |
| 355 - 365   | 1305.5979 | 1304.5906 | 1304.6725 | -63 | 0    | R.GDLYQLVDVQR.L               |

Spot No.: **104**

Mascot score: **87**    Sequence coverage %: **20**

NCBI accession No.: **gi| 9294283**

Matched peptides No.: **8**

Total peptides No.: **23**

Calculated Mr: **42298**

Calculated pI: **5.20**

### Annotated PMF spectra:

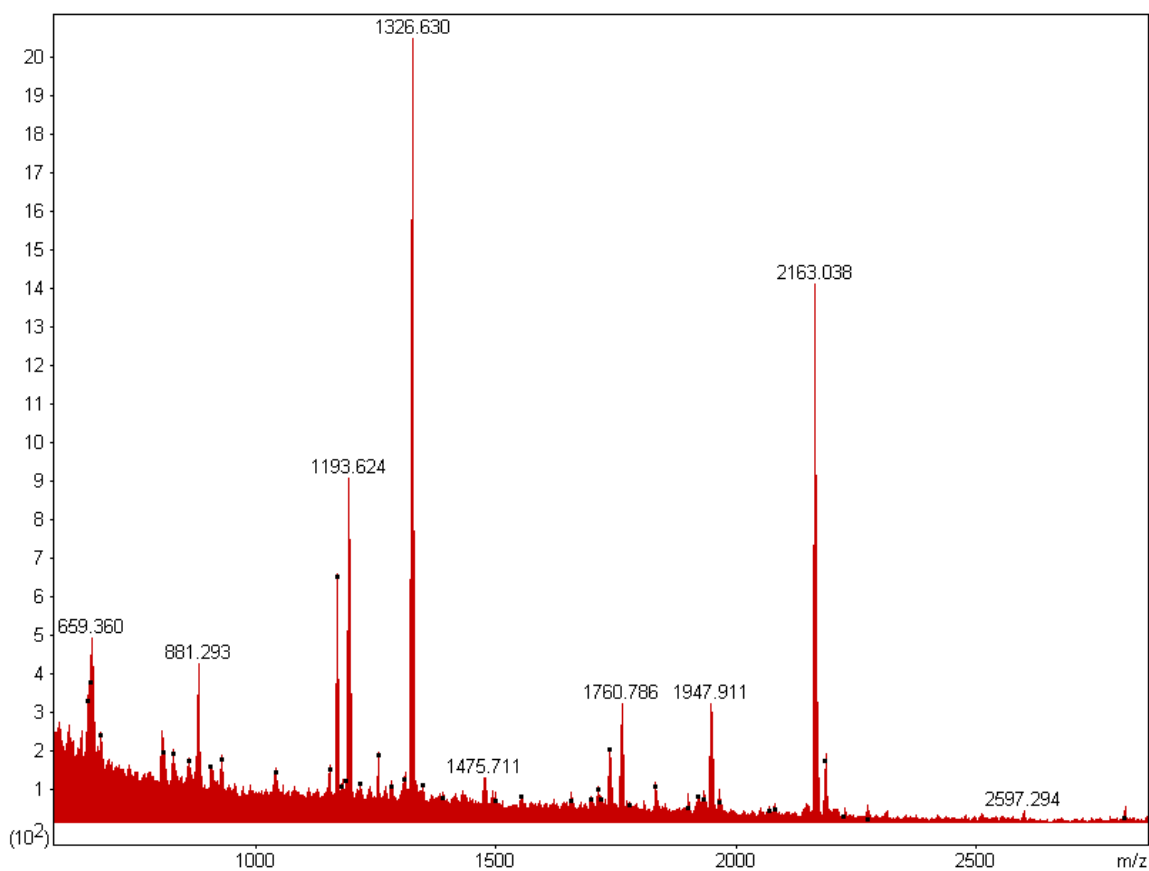

### Probability Based Mowse Score:

Protein score is  $-10 \cdot \log(P)$ , where P is the probability that the observed match is a random event. Protein scores greater than 72 are significant ( $p < 0.05$ ).

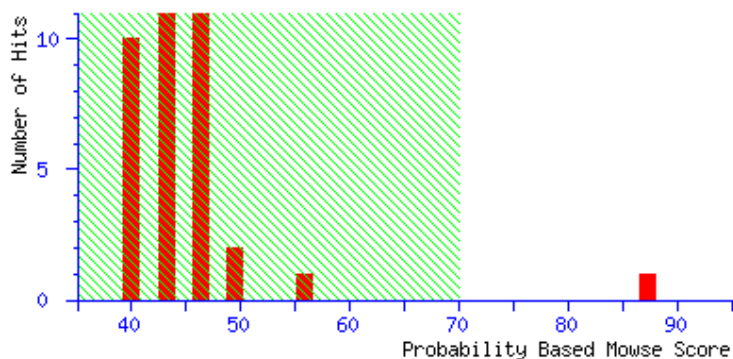



Matched peptide sequences: shown in **Bold Red**

```

1  MEEVLTNPKA GFYMNR DVFG A QGDFITSPE VSQMFGE MIG VWTVCLWEQM
51 GRPERVNLVE LGPGRGTLMA DLLRGTSKFK NFTESLHIHL VECSPALQKL
101 QHQNLIKCTDE SSSEKKAVSS LAGTPVHWHA TLQEVPSGVP TLIIAHEFYD
151 ALPVHQFQTQ YLQKSTRGWC EKMVDVGEDS KFRFVLSPQP TPAALYLMKR
201 CTWATPEERE KMEHVEISPK SMDLTQEMAK RIGSDGGGAL IIDYGMNAII
251 SDSLQAIRKH KFVNILDDPG SADLSAYVDF PSIKHSAAEA SENVSVHGPM
301 TQSQFLGSLG INFRVDALLO NNCNDEQAESL RAGYWQLVGD GEAPFWEQPN
351 EQTPIGMGR YLAMSI VKNK QGIPAPFQ

```

Matched peptides information:

| Start - End | Observed  | Mr(expt)  | Mr(calc)  | ppm | Miss | Sequence                                             |
|-------------|-----------|-----------|-----------|-----|------|------------------------------------------------------|
| 1 - 16      | 1931.9015 | 1930.8942 | 1930.8917 | 1   | 1    | -. <b>MEEVLTNPKAGFYMNR</b> .D 2 Oxidation (M)        |
| 107 - 116   | 1170.4983 | 1169.4910 | 1169.4870 | 3   | 1    | K. <b>CTDESSSEK</b> .A                               |
| 173 - 183   | 1282.6042 | 1281.5969 | 1281.6023 | -4  | 1    | K. <b>MVDVGEDSKFR</b> .F                             |
| 182 - 199   | 2079.0283 | 2078.0210 | 2078.1387 | -57 | 1    | K. <b>FRFVLS</b> PQP <b>TPAALYLMK</b> .R             |
| 184 - 200   | 1947.9113 | 1946.9040 | 1947.0652 | -83 | 1    | R. <b>FVLS</b> PQP <b>TPAALYLMK</b> .C Oxidation (H) |
| 210 - 220   | 1326.6296 | 1325.6223 | 1325.6649 | -32 | 1    | R. <b>KMEHVEISPK</b> .S                              |
| 221 - 230   | 1153.5889 | 1152.5816 | 1152.5155 | 57  | 0    | K. <b>SMDLTQEMAK</b> .R                              |
| 221 - 231   | 1309.6448 | 1308.6375 | 1308.6166 | 16  | 1    | K. <b>SMDLTQEMAKR</b> .I                             |

Spot No.: **105**

Mascot score: **84**    Sequence coverage %: **25**

NCBI accession No.: **gi| 75149864**

Matched peptides No.: **9**

Total peptides No.: **21**

Calculated Mr: **50562**

Calculated pI: **6.43**

### Annotated PMF spectra:

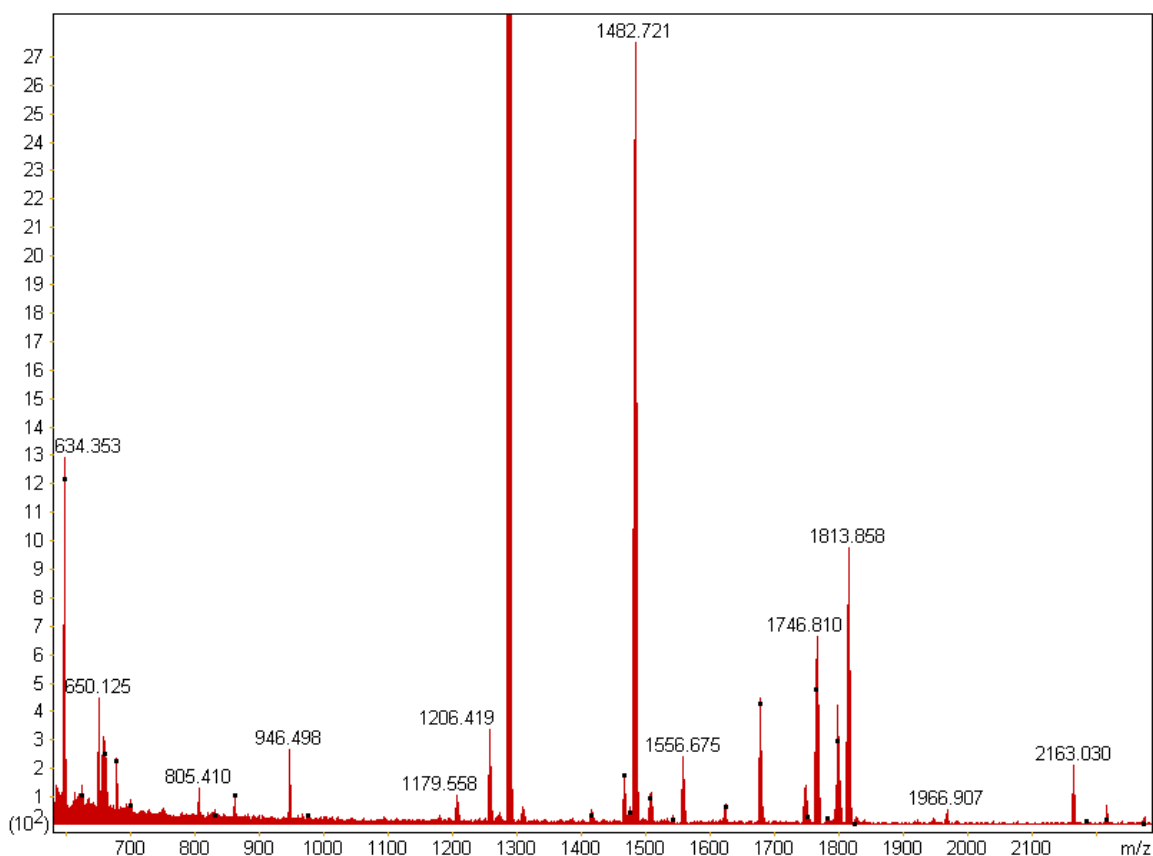

### Probability Based Mowse Score:

Protein score is  $-10 \cdot \log(P)$ , where P is the probability that the observed match is a random event. Protein scores greater than 72 are significant ( $p < 0.05$ ).

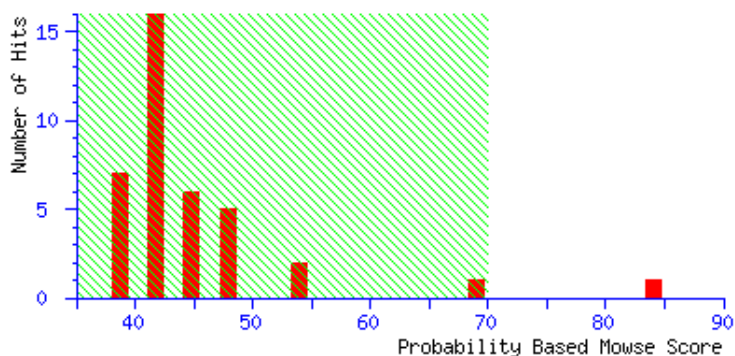

## Matched peptide sequences: shown in **Bold Red**

**1** MSATLTGSGT ALGFSCSSKI SKR**VSSSPST** **RCSIK**MSVSV DEK~~KK~~SFTLQ  
**51** KSEEAFA~~NA~~AK **NLM****PGGVNSP** **VRA**FKSVGGQ PVLIDSVKGS KMWDIDGNEY  
**101** IDYVGSWGP~~A~~ IIGHADDEVL AALAETMKKG TSFGAPCLLE NVLAEMVISA  
**151** VPSIEMVRFV **NSGTEACMGV** **LRL**LARAFTNK EKFIKFEGCY HGHANAFLVK  
**201** **AGSGVATLGL** **PDS**PGVPKAA TSDTLTAPYN DIEAVAKLFE AHKGEISAVI  
**251** LEPVVGNSGF ITPTPEFING LRQLTK**DNGA** **LLIFDEVMTG** **FRLAYGGAQE**  
**301** **YFGITPDLTT** **LGKIIGGLP** **VGAYGRR**DI MEMVAPAGPM YQAGT~~LS~~GNP  
**351** LAMTAGIHTL KRLKQPGTYE YLDKIT**KELT** **NGILEAGKKT** GHPMCGGYIS  
**401** GMFGFFFAEG PVYNFADAKK SDTEKFGKFF RGMLEEGVYF APSQFEAGFT  
**451** SLAHTSEDIQ FTISAAERVL GRI

## Matched peptides information:

| Start - End | Observed  | Mr(expt)  | Mr(calc)  | ppm | Miss | Sequence                                |
|-------------|-----------|-----------|-----------|-----|------|-----------------------------------------|
| 24 - 35     | 1308.6864 | 1307.6791 | 1307.6503 | 22  | 1    | R.VSSSPSTRCSIK.M                        |
| 61 - 72     | 1256.6068 | 1255.5995 | 1255.6343 | -28 | 0    | K.NLM <b>PGGVNSPVR</b> .A Oxidation (M) |
| 159 - 172   | 1540.6894 | 1539.6821 | 1539.7174 | -23 | 0    | R.FVNSGTEACMGVLR.L                      |
| 159 - 172   | 1556.6753 | 1555.6680 | 1555.7123 | -28 | 0    | R.FVNSGTEACMGVLR.L Oxidation (M)        |
| 201 - 218   | 1622.8367 | 1621.8294 | 1621.8676 | -24 | 0    | K.AGSGVATLGLPDS <b>PGVPK</b> .A         |
| 277 - 292   | 1813.8578 | 1812.8505 | 1812.8716 | -12 | 0    | K.DNGALLIFDEVMTGER.L Oxidation (M)      |
| 293 - 313   | 2215.0999 | 2214.0926 | 2214.1208 | -13 | 0    | R.LAYGGAQEYFGITPDLTT <b>LK</b> .I       |
| 314 - 327   | 1286.7051 | 1285.6978 | 1285.7143 | -13 | 0    | K.IIGGLPVGAYGGR.R                       |
| 378 - 389   | 1272.6205 | 1271.6132 | 1271.7085 | -75 | 1    | K.ELTNGILEAGK <b>K</b> .T               |

Spot No.: **106**

Mascot score: **96** Sequence coverage %: **18**

NCBI accession No.: **gi| 77556926**

Matched peptides No.: **10**

Total peptides No.: **23**

Calculated Mr: **45918**

Calculated pI: **7.99**

### Annotated PMF spectra:

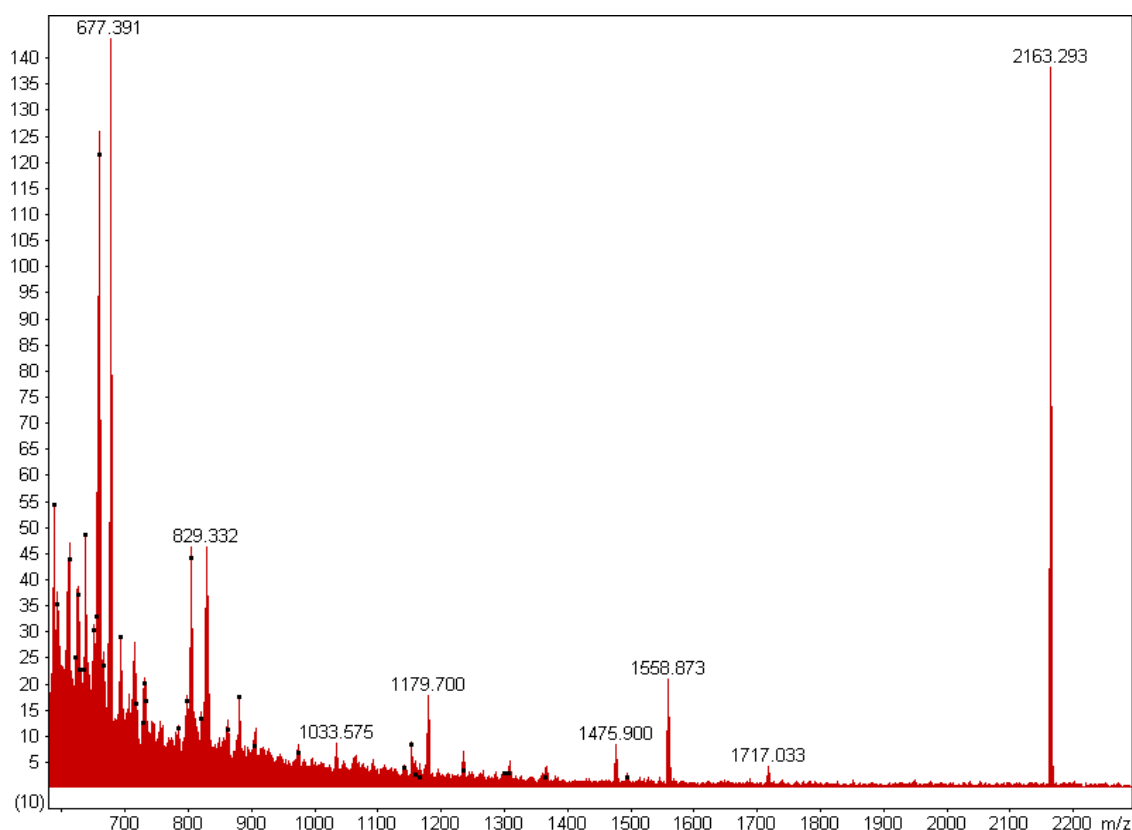

### Probability Based Mowse Score:

Protein score is  $-10 \cdot \log(P)$ , where P is the probability that the observed match is a random event. Protein scores greater than 72 are significant ( $p < 0.05$ ).

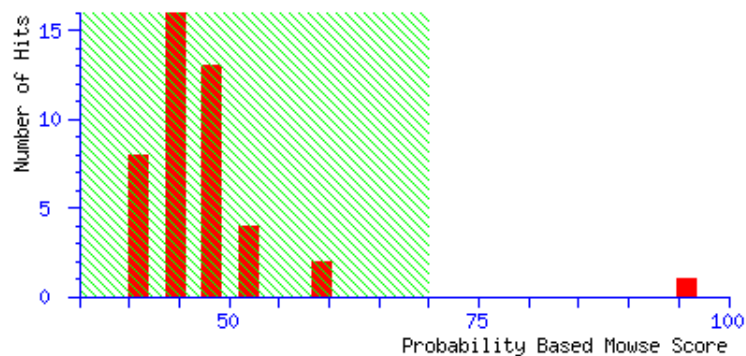

Matched peptide sequences: shown in **Bold Red**

**1** MAAAQPPLPW GDLPADLLGL VLLR**LPSLPD** RVRLRAVCRS WRAGAA**GRH**  
**51** **PRL**PPPLPWL ALRDGGLVDL DGEPIRCPTP IPRHG**VVGH**L AVDN**LAF**LIH  
**101** RDGGCSLLNP LSSSASAATA AITPLPWLN**L** AAVDGAIGQP GVF**IGIG**AYV  
**151** NVYSKSVLSS PLDSSPDPLV AVVTS**GGRHV** **AVAPCK**RRGV VTIVSGLM**AP**  
**201** QIPGLNPTRF SDIAFLGGNL YTLTNAEGLL VLDLGSNGVD DPPNASH**RRC**  
**251** IADDPNQHEY YIDG**STKNKS** **LVLRYLVGSN** **GRLLMVRR**WM NCR**QQYYAGD**  
**301** **MDKTR**GFEVF AAVISDGHGQ WVKVDSLGDQ AIFLSSECSK SVTASQ**CADG**  
**351** IQQDCIYFMH RIYDNPT**KEC** **HGPCVDPLGD** **SGVYNMR**DGT INLLRPP**AVM**  
**401** **SELR**WKROYL TWFFPSDE

Matched peptides information:

| Start - End | Observed  | Mr(expt)  | Mr(calc)  | ppm  | Miss Sequence                     |
|-------------|-----------|-----------|-----------|------|-----------------------------------|
| 25 - 31     | 797.3482  | 796.3409  | 796.4443  | -130 | 0 R.LPSLPDR.V                     |
| 48 - 52     | 622.2700  | 621.2627  | 621.3459  | -134 | 1 R.GRHPR.L                       |
| 179 - 186   | 881.3734  | 880.3661  | 880.4589  | -105 | 0 R.HVAVAPCK.R                    |
| 268 - 274   | 829.3323  | 828.3251  | 828.5181  | -233 | 1 K.NKSLVLR.Y                     |
| 270 - 274   | 587.2406  | 586.2333  | 586.3802  | -251 | 0 K.SLVLR.Y                       |
| 275 - 287   | 1493.8278 | 1492.8205 | 1492.8184 | 1    | 1 R.YLVGSNGRLLMVR.R Oxidation (M) |
| 294 - 303   | 1234.7275 | 1233.7202 | 1233.4972 | 181  | 0 R.QQYYAGDMDK.T Oxidation (M)    |
| 294 - 305   | 1475.8999 | 1474.8926 | 1474.6511 | 164  | 1 R.QQYYAGDMDKTR.G                |
| 369 - 387   | 2163.2927 | 2162.2854 | 2161.8980 | 179  | 0 K.ECHGPCVDPLGDSGVYNMR.D         |
| 398 - 404   | 805.4483  | 804.4410  | 804.4164  | 31   | 0 R.AVMSELR.W                     |

Spot No.: **107**

Mascot score: **91**    Sequence coverage %: **24**

NCBI accession No.: **gi| 710400**

Matched peptides No.: **13**

Total peptides No.: **31**

Calculated Mr: **43460**

Calculated pI: **6.84**

### Annotated PMF spectra:

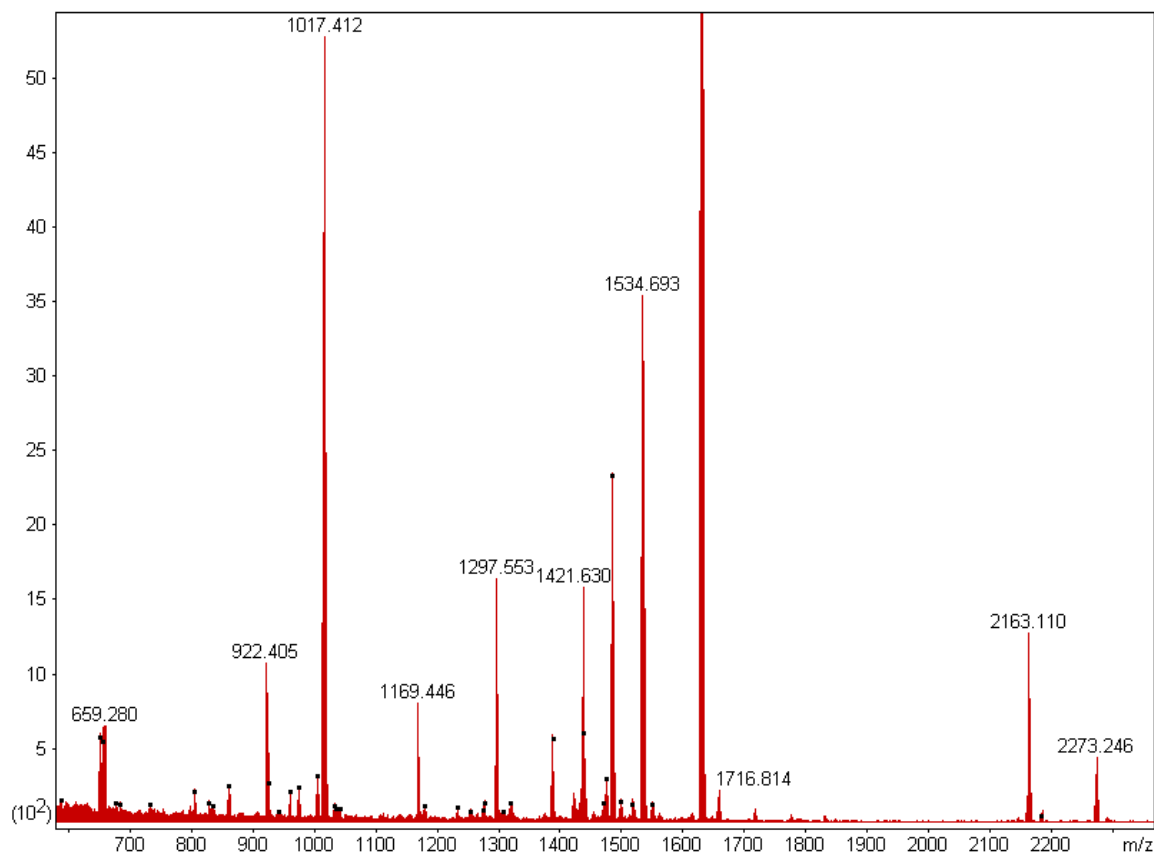

### Probability Based Mowse Score:

Protein score is  $-10 \cdot \log(P)$ , where P is the probability that the observed match is a random event. Protein scores greater than 72 are significant ( $p < 0.05$ ).

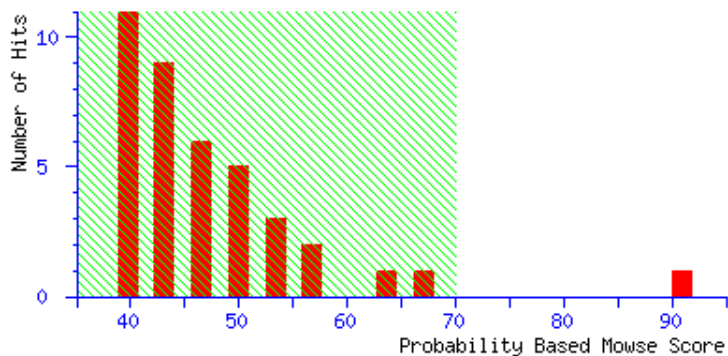

Matched peptide sequences: shown in **Bold Red**

**1** **MALSRLSSRS** NIITRPFSAA FSRLISTD TT PITIETSLPF TAHLCDPPSR  
**51** SVESSSQELL DFFRTMALMR RMEIAADSLY KANVIRGFCH LYDGQEAVAI  
**101** GMEAAITKKD **AIITAYRDHC IFLGRGSLH EVFSELMGRQ** AGCSKGGGS  
**151** **MHFYK**KESSF YGGHGIVGAQ VPLGCGIAFA QKYNKEEAVT FALYGDGAAN  
**201** QGQLFEALNI SALWDLPAIL VCENNHYGMG TAEWRAAKSP SY~~YK~~**RGDYVP**  
**251** **GLKVDGMDAF** AVKQACKFAK QHALEK**GPII** **LEMDTYR**YHG HSMSDPGSTY  
**301** **RTRDEISGVR** **QERDPIER**IK KLVLSHDLAT EKELKDMEKE IRKEVDDAIA  
**351** KAKDCPMPEP SELFTNVYVK **GFGTESFGPD** **RKEVKASLP**

Matched peptides information:

| Start - End | Observed  | Mr(expt)  | Mr(calc)  | ppm  | Miss | Sequence                        |
|-------------|-----------|-----------|-----------|------|------|---------------------------------|
| 1 - 9       | 1036.3839 | 1035.3766 | 1035.5495 | -167 | 1    | -.MALSRLSSR.S Oxidation (M)     |
| 110 - 117   | 922.4050  | 921.3978  | 921.4920  | -102 | 0    | K.DAIITAYR.D                    |
| 118 - 125   | 1017.4119 | 1016.4046 | 1016.4862 | -80  | 0    | R.DHCIFLGR.G                    |
| 126 - 139   | 1518.6931 | 1517.6858 | 1517.7297 | -29  | 0    | R.GGSLHEVSELMGR.Q               |
| 126 - 139   | 1534.6932 | 1533.6859 | 1533.7246 | -25  | 0    | R.GGSLHEVSELMGR.Q Oxidation (M) |
| 148 - 155   | 926.3702  | 925.3629  | 925.4116  | -53  | 0    | K.GGSMHFYK.K                    |
| 148 - 155   | 942.3386  | 941.3314  | 941.4065  | -80  | 0    | K.GGSMHFYK.K Oxidation (M)      |
| 245 - 253   | 1004.4716 | 1003.4643 | 1003.5451 | -80  | 1    | K.RGDYVPLK.V                    |
| 277 - 287   | 1307.5923 | 1306.5850 | 1306.6591 | -57  | 0    | K.GPIILEMDTYR.Y                 |
| 302 - 310   | 1032.4433 | 1031.4360 | 1031.5360 | -97  | 1    | R.TRDEISGVR.Q                   |
| 311 - 318   | 1042.4185 | 1041.4112 | 1041.5203 | -105 | 1    | R.QERDPIER.I                    |
| 371 - 381   | 1169.4463 | 1168.4390 | 1168.5149 | -65  | 0    | K.GFGTESFGPDR.K                 |
| 371 - 382   | 1297.5532 | 1296.5459 | 1296.6099 | -49  | 1    | K.GFGTESFGPDRK.E                |

Spot No.: **108**

Mascot score: **108**    Sequence coverage %: **24**

NCBI accession No.: **gi| 15226690**

Matched peptides No.: **12**

Total peptides No.: **29**

Calculated Mr: **43724**

Calculated pI: **8.29**

### Annotated PMF spectra:

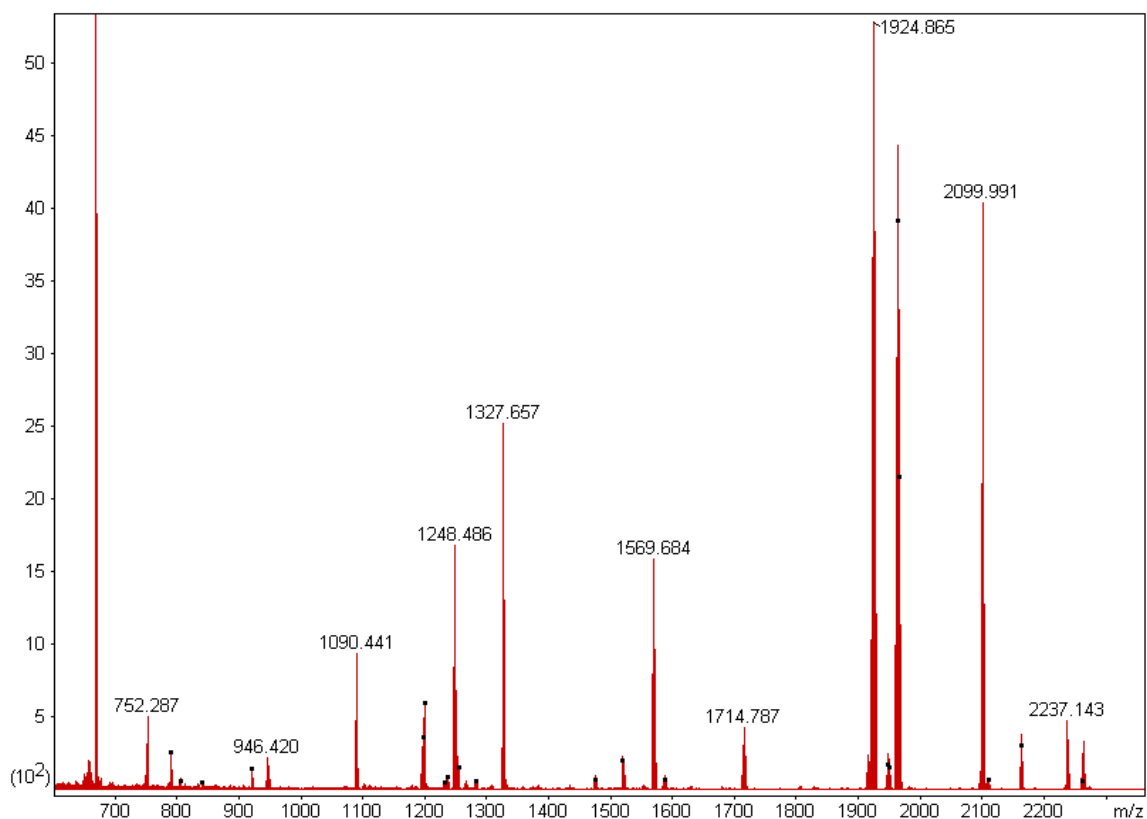

### Probability Based Mowse Score:

Protein score is  $-10 \cdot \log(P)$ , where P is the probability that the observed match is a random event. Protein scores greater than 72 are significant ( $p < 0.05$ ).

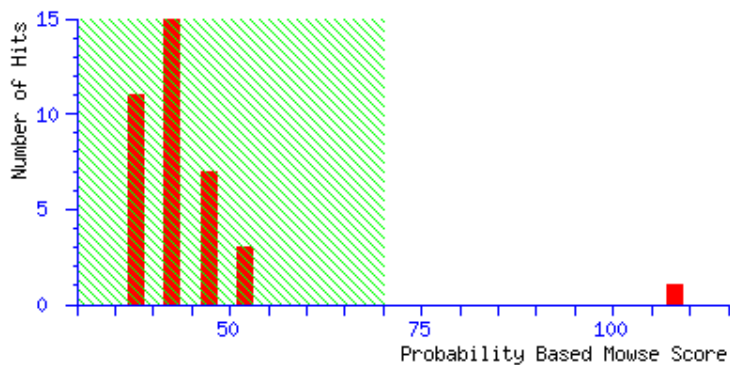



Matched peptide sequences: shown in **Bold Red**

**1 MSILQVSTSS LSSSTLLSIS PRKSLSSSTKS CRIVR**CSVEG TTVTERKVSA  
**51 TSEPLLLRAV KGEVVD**RPV**WLMR**QAGRYM KSYQTLCEKY **PSFR**DRSENA  
**101 DLVVEISLQP WKVFKPDGVI LFS**DILTP**LS** GMNIPFDIVK GKGPIIFNPP  
**151 QSAADVAQVR E**FVPEESVPY VGEALRRLRN EVNNEAAVLG FVGAPFTLSS  
**201 YVIEGGSSKN FTQIKRLAFS QPKVLHALLQ KFTTSMITYI RYQAD**SGAQA  
**251 VQIFDSWATE LSPVD**FEEFS LPYLKQIVEA VKQTHPNLPL ILYASGSGGL  
**301 LERLARTGVD VVSLDWTVDMAEGR**DRLGRD IAVQGNVDPG VLFGSKEFIT  
**351 SR**IHD**TVKKA** GRDKHILNLG HGIKVGTPEE NVAHF**FEVAQ** EIRY

Matched peptides information:

| Start - End | Observed  | Mr(expt)  | Mr(calc)  | ppm  | Miss Sequence                                     |
|-------------|-----------|-----------|-----------|------|---------------------------------------------------|
| 2 - 22      | 2163.0194 | 2162.0121 | 2162.1794 | -77  | 0 M.SILQVSTSS <b>LSSSTLLSIS</b> PR.K              |
| 30 - 35     | 790.3277  | 789.3204  | 789.4279  | -136 | 1 K.SCRIVR.C                                      |
| 62 - 74     | 1569.6845 | 1568.6772 | 1568.8133 | -87  | 0 K.GEVVD <b>RPVWLMR</b> .Q Oxidation (M)         |
| 90 - 94     | 669.2677  | 668.2604  | 668.3282  | -101 | 0 K.YPSFR.D                                       |
| 216 - 223   | 946.4203  | 945.4130  | 945.5396  | -134 | 1 K.RLAF <b>SQPK</b> .V                           |
| 224 - 231   | 921.4327  | 920.4254  | 920.5807  | -169 | 0 K.VLHALL <b>QK</b> .F                           |
| 232 - 241   | 1232.5050 | 1231.4977 | 1231.6271 | -105 | 0 K.FTT <b>SMITYI</b> R.Y                         |
| 232 - 241   | 1248.4858 | 1247.4785 | 1247.6220 | -115 | 0 K.FTT <b>SMITYI</b> R.Y Oxidation (M)           |
| 307 - 324   | 1949.8088 | 1948.8015 | 1948.9201 | -61  | 0 R.TGVD <b>VVSLDWTVDMAEGR</b> .D                 |
| 307 - 324   | 1965.8684 | 1964.8611 | 1964.9150 | -27  | 0 R.TGVD <b>VVSLDWTVDMAEGR</b> .D Oxidation (M)   |
| 307 - 326   | 2237.1431 | 2236.1358 | 2236.0430 | 41   | 1 R.TGVD <b>VVSLDWTVDMAEGRDR</b> .L Oxidation (M) |
| 347 - 352   | 752.2869  | 751.2796  | 751.3864  | -142 | 0 K.EFIT <b>SR</b> .I                             |

Spot No.: **109**

Mascot score: **118**    Sequence coverage %: **42**

NCBI accession No.: **gi| 312282695**

Matched peptides No.: **13**

Total peptides No.: **30**

Calculated Mr: **35946**

Calculated pI: **6.33**

### Annotated PMF spectra:

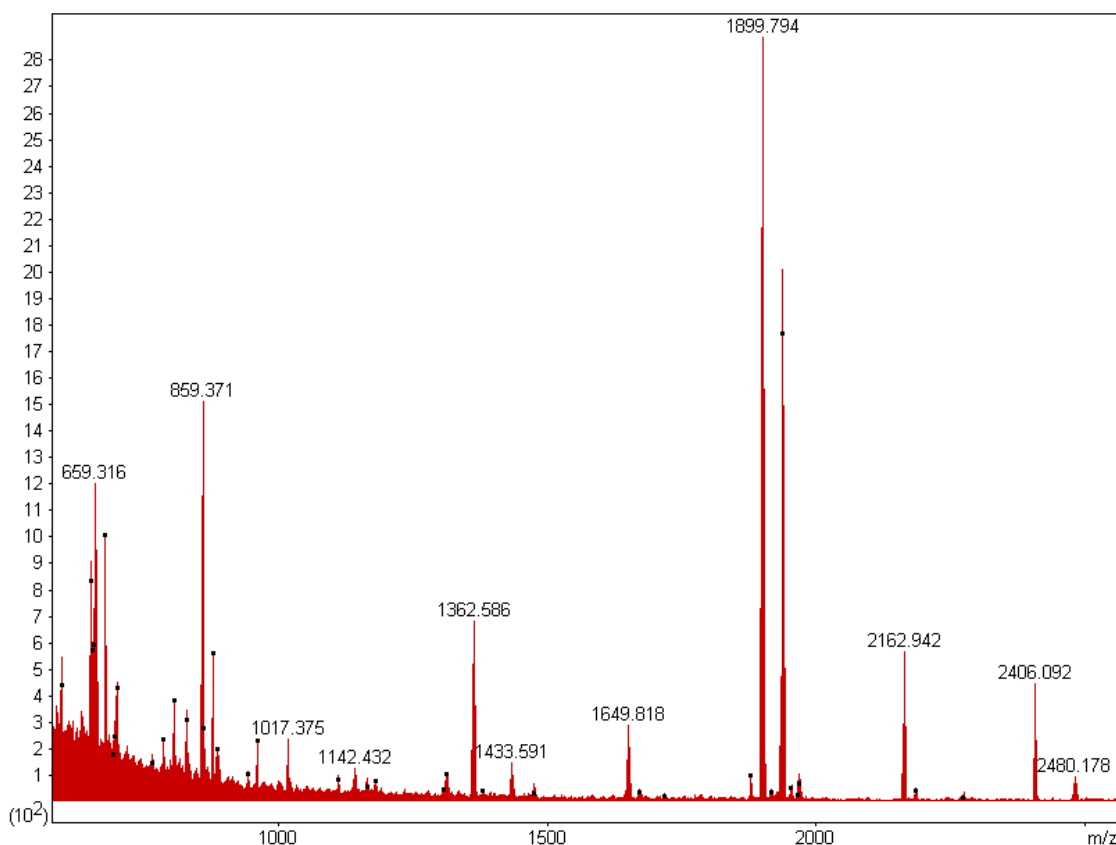

### Probability Based Mowse Score:

Protein score is  $-10 \cdot \log(P)$ , where P is the probability that the observed match is a random event. Protein scores greater than 72 are significant ( $p < 0.05$ ).

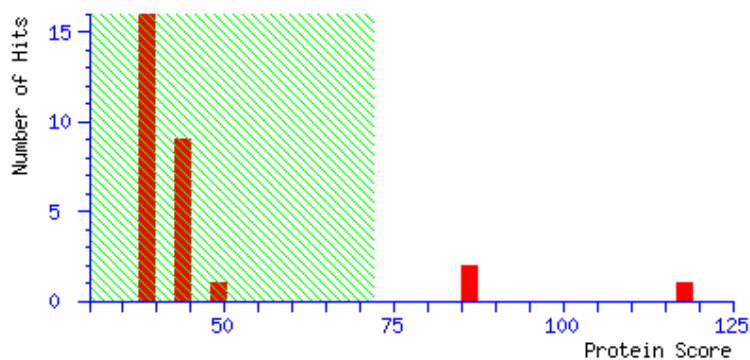

Matched peptide sequences: shown in **Bold Red**

```

1 MAKDPVRVLV TGAAGQIGYA LVPMIARGIM LGADQPVLH MLDIPPAAEA
51 LNGVKMELVD AAFPLLKGVV ATTDAVEGCT GVNVAVMVGG FPRKEGMEREK
101 DVMSKNVSIY KSQAAALEKH AAPNCKVLVV ANPANTNALI LKEFAPSIPE
151 KNITCLTRLD HNRALGQVSE RLSVPVSDVK NVIIWGNHSS TQYPDVNHAT
201 VKTSSGEKPV RELVKNDEWL NGEFISTVQQ RGAATIKARK LSSALSAASS
251 ACDHIRDWVL GTPGTFVSM GVYSDGSYNV PSGLIYSFPV TCRNGEWSIV
301 QGLPIDEVSR KKMDLTAEEL KEEKDLAYSC LS

```

Matched peptides information:

| Start - End | Observed  | Mr(expt)  | Mr(calc)  | ppm  | Miss | Sequence                       |
|-------------|-----------|-----------|-----------|------|------|--------------------------------|
| 56 - 67     | 1362.5865 | 1361.5792 | 1361.7265 | -108 | 0    | K.MELVDAAFPLLK.G Oxidation (M) |
| 95 - 100    | 765.2871  | 764.2799  | 764.3487  | -90  | 1    | K.EGMEREK.D Oxidation (M)      |
| 127 - 142   | 1649.8180 | 1648.8107 | 1648.9876 | -107 | 0    | K.VLVVANPANTNALILK.E           |
| 143 - 151   | 1017.3746 | 1016.3673 | 1016.5178 | -148 | 0    | K.EFAPSIPEK.N                  |
| 152 - 158   | 877.3595  | 876.3523  | 876.4487  | -110 | 0    | K.NITCLTR.L                    |
| 159 - 163   | 654.2545  | 653.2472  | 653.3245  | -118 | 0    | R.LDHN.R.A                     |
| 164 - 171   | 859.3711  | 858.3638  | 858.4559  | -107 | 0    | R.ALGQVSER.L                   |
| 172 - 180   | 943.3793  | 942.3720  | 942.5386  | -177 | 0    | R.LSVPVSDVK.N                  |
| 181 - 202   | 2480.1777 | 2479.1704 | 2479.2244 | -22  | 0    | K.NVIIWGNHSSSTQYPDVNHATVK.T    |
| 203 - 211   | 960.4038  | 959.3965  | 959.5036  | -112 | 1    | K.TSSGEKPV.R.E                 |
| 212 - 231   | 2406.0923 | 2405.0850 | 2404.2023 | 367  | 1    | R.ELVKNDEWLNGEFISTVQQR.G       |
| 216 - 231   | 1936.7763 | 1935.7690 | 1934.9122 | 443  | 0    | K.NDEWLNGEFISTVQQR.G           |
| 294 - 310   | 1899.7937 | 1898.7864 | 1897.9534 | 439  | 0    | R.NGEWSIVQGLPIDEVSR.K          |

Spot No.: **110**

Mascot score: **163**

Sequence coverage %: **57**

NCBI accession No.: **gi| 312282121**

Matched peptides No.: **19**

Total peptides No.: **50**

Calculated Mr: **36888**

Calculated pI: **6.20**

### Annotated PMF spectra:

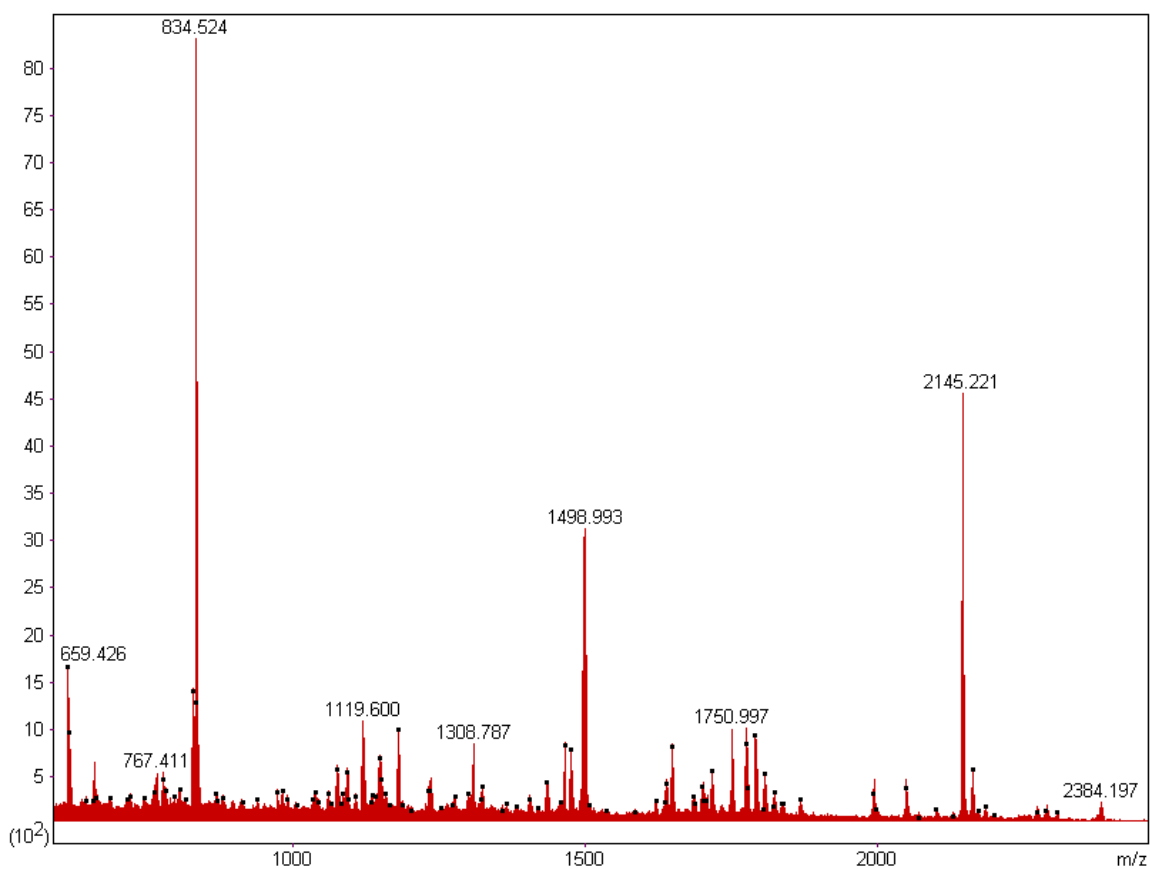

### Probability Based Mowse Score:

Protein score is  $-10 \cdot \log(P)$ , where P is the probability that the observed match is a random event. Protein scores greater than 72 are significant ( $p < 0.05$ ).

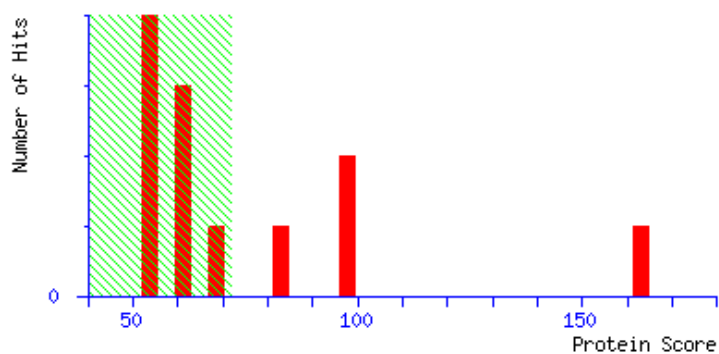

Matched peptide sequences: shown in **Bold Red**

1 MTGAKIKIGI **NGFGRIGRLV** ARVVLQRDDV ELVAVNDPFI TTEYMTYMFK  
 51 **YDSVHGQWKH** HELKVKDEKT **LLFGEKPVTV** FGIKNPEDIP WGEAGADFVV  
 101 ESTGVFTDKD **KAAHLKGGGA** KKVVISAPSK **DAPMFVGVN** **EHEYKSDLDI**  
 151 VSNASCTTDC **LAPLAKVIND** **RFGIVEGLMT** TVHSITATQK **TVDGPSMKDW**  
 201 **RGGRAASFNI** **IPSSTGAAKA** VGKVLPLQNG **KLTGMSFRVP** **TVDVSVVDLT**  
 251 **VRLEKAATYD** **EIKKAIKEES** **EGKLGILGY** **TEDDVVSTDF** **VGDSRSSIFD**  
 301 **AKAGIALSEN** **FVKLVSWDN** **EWGYSTRVVD** LIVHMSKA

Matched peptides information:

| Start - End | Observed  | Mr (expt) | Mr (calc) | ppm | Miss | Sequence                              |
|-------------|-----------|-----------|-----------|-----|------|---------------------------------------|
| 8 - 15      | 833.5105  | 832.5033  | 832.4555  | 57  | 0    | K.IGINGFGR.I                          |
| 23 - 27     | 614.4461  | 613.4388  | 613.3911  | 78  | 0    | R.VVLQR.D                             |
| 51 - 59     | 1119.6001 | 1118.5928 | 1118.5145 | 70  | 0    | K.YDSVHGQWK.H                         |
| 67 - 76     | 1179.7037 | 1178.6964 | 1178.6183 | 66  | 1    | K.DEKTLFGEK.P                         |
| 70 - 84     | 1649.1241 | 1648.1168 | 1647.9600 | 95  | 1    | K.TLLFGEKPVTVFGIK.N                   |
| 131 - 145   | 1750.9969 | 1749.9896 | 1749.8032 | 107 | 0    | K.DAPMFVGVNEHEYK.S Oxidation (M)      |
| 167 - 171   | 616.3935  | 615.3863  | 615.3340  | 85  | 0    | K.VINDR.F                             |
| 172 - 190   | 2049.2815 | 2048.2742 | 2048.0612 | 104 | 0    | R.FGIVEGLMTTVHSITATQK.T Oxidation (M) |
| 191 - 198   | 834.5240  | 833.5167  | 833.3953  | 146 | 0    | K.TVDGPSMK.D                          |
| 205 - 219   | 1434.8747 | 1433.8674 | 1433.7514 | 81  | 0    | R.AASFNIIPSSTGAAK.A                   |
| 232 - 238   | 827.4488  | 826.4415  | 826.4007  | 49  | 0    | K.LTGMSFR.V Oxidation (M)             |
| 239 - 252   | 1498.9932 | 1497.9859 | 1497.8403 | 97  | 0    | R.VPTVDVSVVDLTVR.L                    |
| 239 - 255   | 1869.2394 | 1868.2321 | 1868.0619 | 91  | 1    | R.VPTVDVSVVDLTVRLEK.A                 |
| 256 - 264   | 1038.5976 | 1037.5903 | 1037.5393 | 49  | 1    | K.AATYDEIKK.A                         |
| 265 - 273   | 990.5377  | 989.5304  | 989.5029  | 28  | 1    | K.AIKEESEGK.L                         |
| 276 - 295   | 2145.2205 | 2144.2132 | 2143.9910 | 104 | 0    | K.GILGYTEDDVVSTDFVGDSSR.S             |
| 296 - 302   | 767.4106  | 766.4033  | 766.3861  | 22  | 0    | R.SSIFDAK.A                           |
| 303 - 313   | 1148.7073 | 1147.7000 | 1147.6237 | 67  | 0    | K.AGIALSENFVK.L                       |
| 314 - 327   | 1776.0152 | 1775.0079 | 1774.7951 | 120 | 0    | K.LVSWYDNEWGYSTR.V                    |

Spot No.: **111**

Mascot score: **109**    Sequence coverage %: **35**

NCBI accession No.: **gi| 166702**

Matched peptides No.: **12**

Total peptides No.: **29**

Calculated Mr: **37937**

Calculated pI: **7.00**

### Annotated PMF spectra:

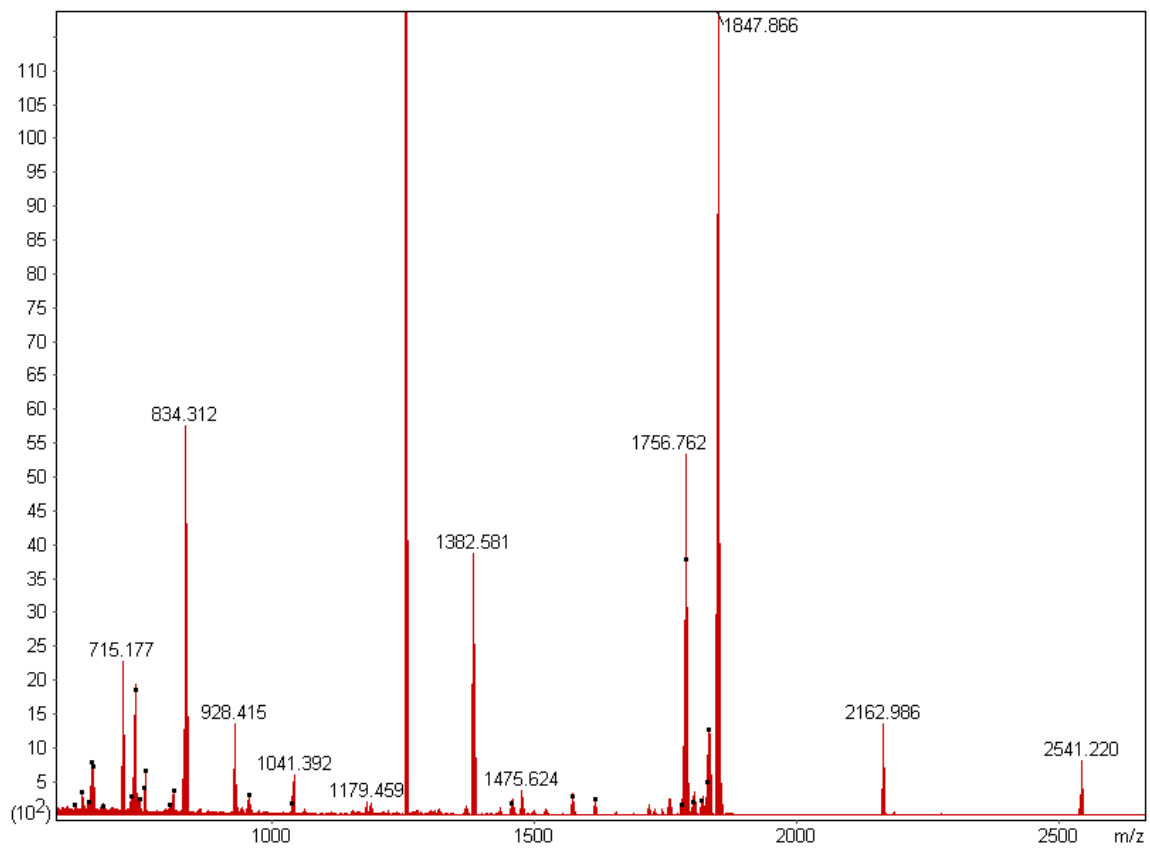

### Probability Based Mowse Score:

Protein score is  $-10 \cdot \log(P)$ , where P is the probability that the observed match is a random event. Protein scores greater than 72 are significant ( $p < 0.05$ ).

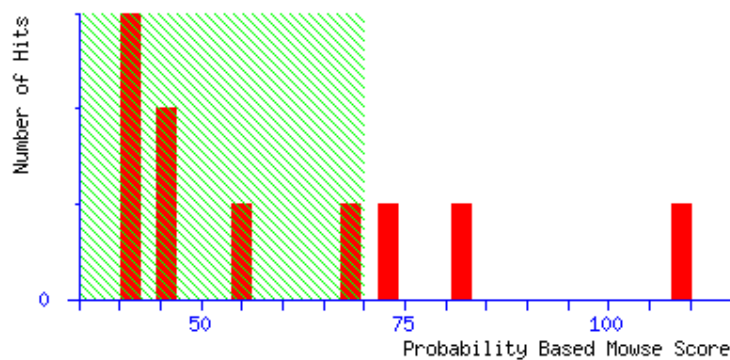

Matched peptide sequences: shown in **Bold Red**

```

1  MGSSGGYRKG VTEAKLKVAI NGFGRIGRNF LRCCWHGRKDS PLDIIAINDT
51 GGVKQASHLL KYDSTLGFID ADVKPSGETA ISVDGKIIQV VSNRNPSLLP
101 WKELGIDIVI EGTGVFVDRE GAGKHMEAGA KKVITAPGK GDIPTYVWGV
151 NADAYSHDEP IISNASCTTM CLAPFVKVLD QKFGIIKGTM TTTHSYTGDQ
201 RLLDASHRDL RRARAAALNI VPTSTGAAKA VALVLPNLKG KLNGIALRVP
251 TPNVSVDLV VQVSKTFAE EVNAAFRDSA EKELKGILDV CDEPLVSVDF
301 RCSDFSTTID SSLTMVMGDD MVKVIAWYDN EWGYSQRVVD LADIVANNWK
351

```

Matched peptides information:

| Start - End | Observed  | Mr(expt)  | Mr(calc)  | ppm  | Miss | Sequence                                |
|-------------|-----------|-----------|-----------|------|------|-----------------------------------------|
| 2 - 9       | 811.2828  | 810.2755  | 810.3984  | -152 | 1    | <b>M.GSSGGYRK.G</b>                     |
| 33 - 37     | 715.1768  | 714.1695  | 714.3020  | -186 | 0    | <b>R.CWHGR.K</b>                        |
| 87 - 94     | 928.4151  | 927.4078  | 927.5502  | -153 | 0    | <b>K.IIQVSNR.N</b>                      |
| 103 - 119   | 1831.8466 | 1830.8393 | 1830.9727 | -73  | 0    | <b>K.ELGIDIVIEGTGVFVDR.E</b>            |
| 188 - 201   | 1571.5391 | 1570.5318 | 1570.6682 | -87  | 0    | <b>K.GTMTTTHSYTGDQR.L</b> Oxidation (M) |
| 230 - 239   | 1037.4606 | 1036.4533 | 1036.6644 | -204 | 0    | <b>K.AVALVLPNLK.G</b>                   |
| 242 - 248   | 756.3273  | 755.3201  | 755.4653  | -192 | 0    | <b>K.LNGIALR.V</b>                      |
| 249 - 265   | 1779.8339 | 1778.8266 | 1779.0142 | -105 | 0    | <b>R.VPTPNVSVDLVVQVSK.K</b>             |
| 266 - 277   | 1382.5814 | 1381.5741 | 1381.6990 | -90  | 1    | <b>K.KTFAEEVNAAFR.D</b>                 |
| 267 - 277   | 1254.4878 | 1253.4805 | 1253.6040 | -99  | 0    | <b>K.TFAEEVNAAFR.D</b>                  |
| 324 - 337   | 1786.7127 | 1785.7054 | 1785.8111 | -59  | 0    | <b>K.VIAWYDNEWGYSQR.V</b>               |
| 338 - 350   | 1456.6131 | 1455.6058 | 1455.7722 | -114 | 0    | <b>R.VVDLADIVANNWK.-</b>                |

Spot No.: **112**

Mascot score: **95**    Sequence coverage %: **21**

NCBI accession No.: **gi| 15238762**

Matched peptides No.: **11**

Total peptides No.: **21**

Calculated Mr: **44781**

Calculated pI: **6.38**

### Annotated PMF spectra:

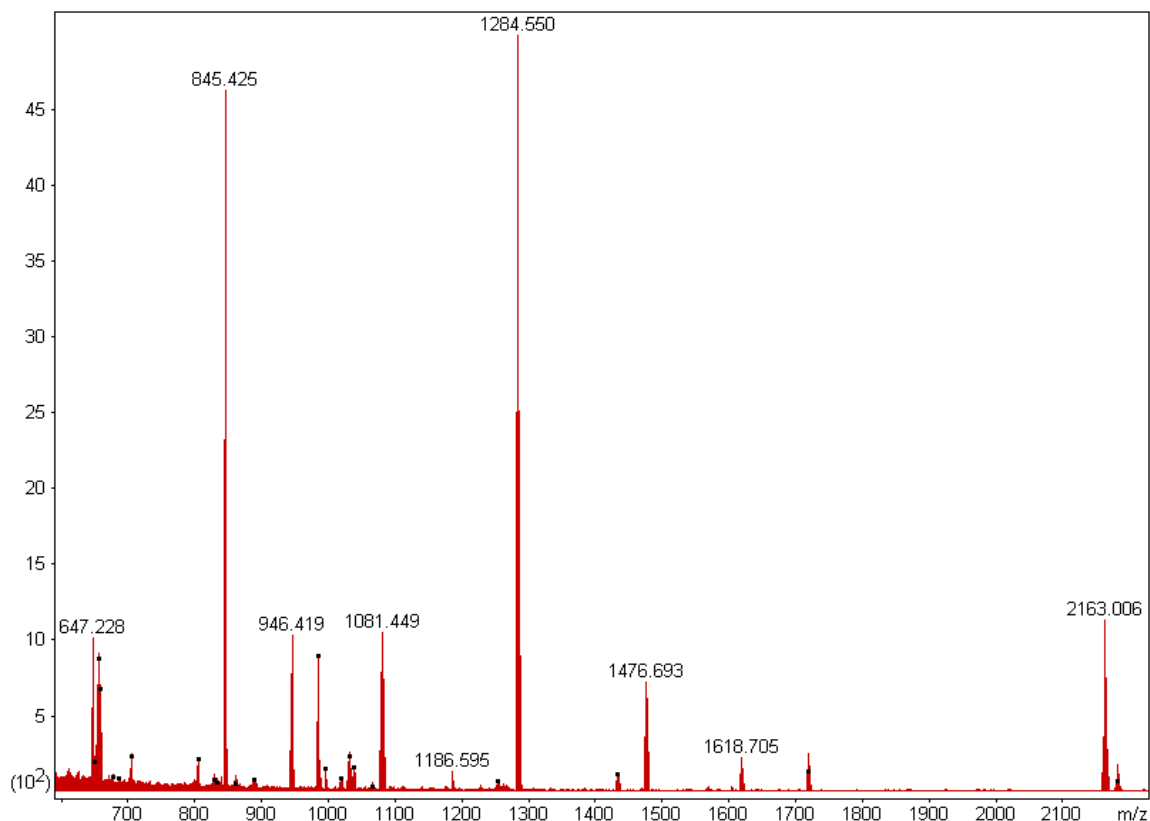

### Probability Based Mowse Score:

Protein score is  $-10 \cdot \log(P)$ , where P is the probability that the observed match is a random event. Protein scores greater than 72 are significant ( $p < 0.05$ ).

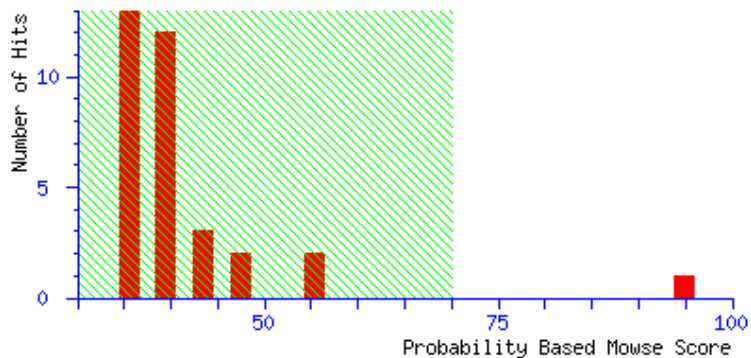



Matched peptide sequences: shown in **Bold Red**

```

1 MNALAATNRN FKLAAARLLGL DSKLEKSLLI PFREIKVECT IPKDDGTLAS
51 FVGFRVQHDN ARGPMKGGIR YHPEVDPDEV NALAQLMTWK TAVAKIPYGG
101 AKGGIGCDPS KLSISELERL TRVFTQKIHD LIGIHTDVPA PDMGTGPQTM
151 AWILDEYSKF HGYSFAVVTG KPIDLGGSLG RDAATGRGVM FGTEALLNEH
201 GKTISGQRFV IQGFGNVGSW AAKLISEKGG KIVAVSDITG AIKNKDGIDI
251 PALLKHTKEH RGVKGF DGAD PIDPNSILVE DCDILVPAAL GGVINRENAN
301 EIKAKFIEA ANHPTDPDAD EILSKKGVVI LPDIYANSGG VTVSYFEWVQ
351 NIQGFMWEEE KVNDELKTYM TRSFKDLKEM CKTHSCDLRM GAFTLGVNRV
401 AQATILRGWG A

```

Matched peptides information:

| Start - End | Observed  | Mr(expt)  | Mr(calc)  | ppm  | Miss | Sequence                          |
|-------------|-----------|-----------|-----------|------|------|-----------------------------------|
| 27 - 33     | 845.4249  | 844.4177  | 844.5171  | -118 | 0    | K.SLLIPFR.E                       |
| 44 - 55     | 1284.5497 | 1283.5424 | 1283.6146 | -56  | 0    | K.DDGTLASFVGF.R.V                 |
| 96 - 102    | 705.2441  | 704.2369  | 704.3857  | -211 | 0    | K.IPYGGAK.G                       |
| 112 - 119   | 946.4189  | 945.4116  | 945.5131  | -107 | 0    | K.LSISELER.L                      |
| 182 - 187   | 590.1253  | 589.1180  | 589.2820  | -278 | 0    | R.DAATGR.G                        |
| 188 - 202   | 1618.7050 | 1617.6977 | 1617.7821 | -52  | 0    | R.GVMFGTEALLNEHGK.T Oxidation (M) |
| 232 - 243   | 1186.5951 | 1185.5878 | 1185.6969 | -92  | 0    | K.IVAVSDITGAIK.N                  |
| 368 - 372   | 687.1946  | 686.1873  | 686.3058  | -173 | 0    | K.TYMR.S Oxidation (M)            |
| 383 - 389   | 888.2897  | 887.2824  | 887.3920  | -123 | 0    | K.THSCDLR.M                       |
| 390 - 399   | 1065.4272 | 1064.4199 | 1064.5437 | -116 | 0    | R.MGAFTLGVNR.V                    |
| 390 - 399   | 1081.4485 | 1080.4412 | 1080.5386 | -90  | 0    | R.MGAFTLGVNR.V Oxidation (M)      |

Spot No.: **113**

Mascot score: **149**    Sequence coverage %: **36**

NCBI accession No.: **gi| 312281829**

Matched peptides No.: **14**

Total peptides No.: **24**

Calculated Mr: **43118**

Calculated pI: **6.49**

### Annotated PMF spectra:

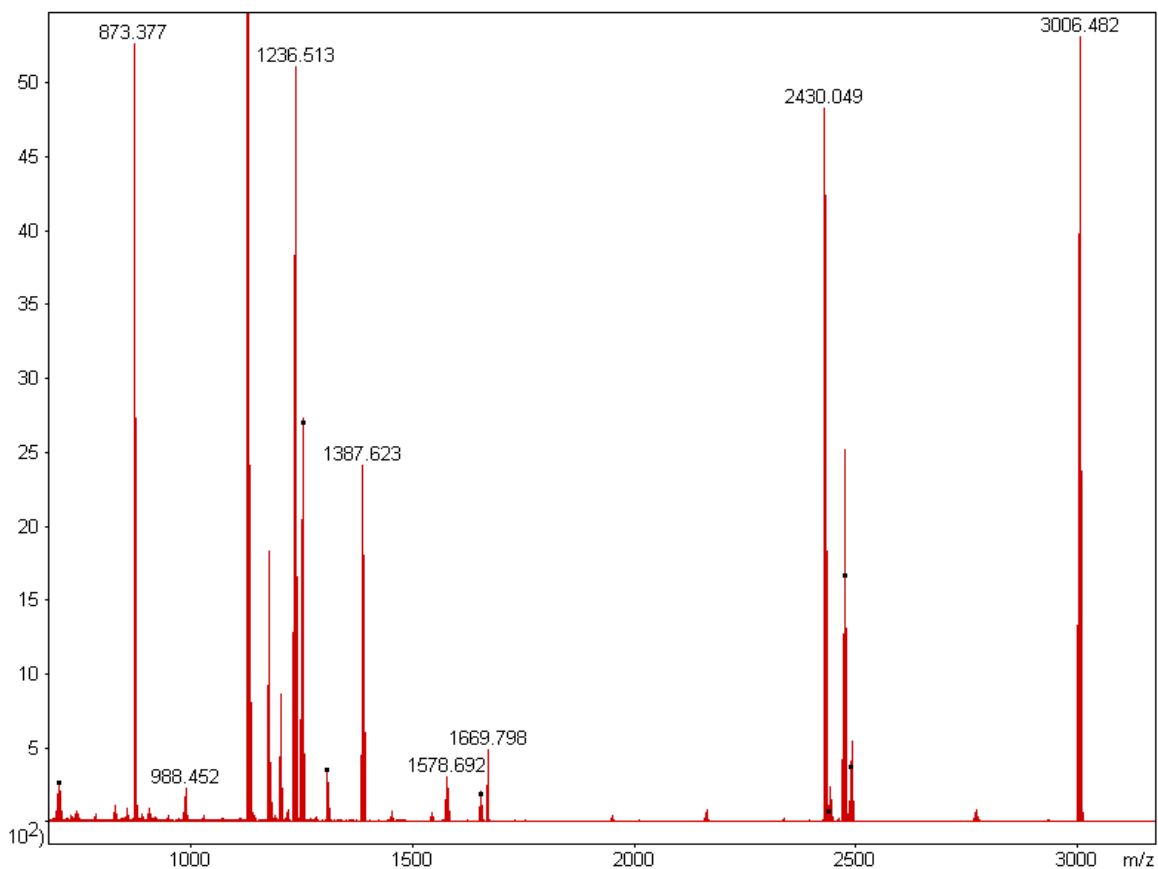

### Probability Based Mowse Score:

Protein score is  $-10 \cdot \log(P)$ , where  $P$  is the probability that the observed match is a random event. Protein scores greater than 72 are significant ( $p < 0.05$ ).

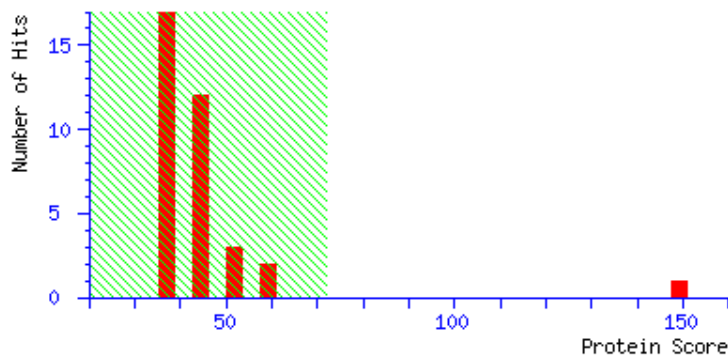

Matched peptide sequences: shown in **Bold Red**

```

1 MASSSATLLK ASPVKSDWVK GQSHLLRQPS SVAAIRSHVA PSALTVRAAS
51 AYADELVKTA KTIASPGRGI LAMDESNATC GKRLLASIGLE NTEANRQAYR
101 TLLVSAPGLG QYISGAILFE ETLYQSTVDG KKMVDVLVEQ NIVPGIKVDK
151 GLVPLVGSND ESWCQGLDGL ASRTAAYYQQ GARFAKWRTV VSIPNGPSAL
201 AVKEAAWGLA RYAAISQDSG LVPIVEPEIL LDGEHGIDRT YEVAEKVWAE
251 VFFYLAQNNV MFEGILLKPS MVTPGAEAKD RATPEQVASY TLKLLRNRIP
301 PAVPGIMFLS GGQSELEATL NLNAMNQGTN PWHVSFSYAR ALQNTCLKTW
351 GGREENVKAA QDTLLTRAKA NSLAQLGKYT EGESEDAKE GMFVKGYTY

```

Matched peptides information:

| Start - End | Observed  | Mr (expt) | Mr (calc) | ppm  | Miss | Sequence                                |
|-------------|-----------|-----------|-----------|------|------|-----------------------------------------|
| 62 - 68     | 701.3016  | 700.2944  | 700.3868  | -132 | 0    | K.TIASPGR.G                             |
| 84 - 96     | 1387.6231 | 1386.6158 | 1386.7103 | -68  | 0    | R.LASIGLENTANR.Q                        |
| 133 - 147   | 1653.7862 | 1652.7789 | 1652.9171 | -84  | 0    | K.MVDVLEQNIVPGIK.V                      |
| 133 - 147   | 1669.7978 | 1668.7905 | 1668.9120 | -73  | 0    | K.MVDVLEQNIVPGIK.V Oxidation (M)        |
| 148 - 173   | 2772.2068 | 2771.1995 | 2771.3549 | -56  | 1    | K.VDKGLVPLVGSNDESWCQGLDGLASR.T          |
| 151 - 173   | 2430.0489 | 2429.0416 | 2429.1645 | -51  | 0    | K.GLVPLVGSNDESWCQGLDGLASR.T             |
| 174 - 183   | 1128.4664 | 1127.4591 | 1127.5359 | -68  | 0    | R.TAAYYQQGAR.F                          |
| 204 - 211   | 873.3766  | 872.3693  | 872.4504  | -93  | 0    | K.EAAWGLAR.Y                            |
| 212 - 239   | 3006.4829 | 3005.4756 | 3005.5346 | -20  | 0    | R.YAAISQDSGLVPIVEPEILLDGEHGIDR.T        |
| 212 - 246   | 3826.7598 | 3825.7525 | 3825.9312 | -47  | 1    | R.YAAISQDSGLVPIVEPEILLDGEHGIDRTYEVAEK.V |
| 280 - 293   | 1578.6916 | 1577.6843 | 1577.8049 | -76  | 1    | K.DRATPEQVASYTLK.L                      |
| 282 - 293   | 1307.5568 | 1306.5495 | 1306.6769 | -97  | 0    | R.ATPEQVASYTLK.L                        |
| 349 - 358   | 1175.4954 | 1174.4881 | 1174.5731 | -72  | 1    | K.TWGREENVK.A                           |
| 359 - 367   | 988.4520  | 987.4448  | 987.5349  | -91  | 0    | K.AAQDTLLTR.A                           |

Spot No.: **114**

Mascot score: **86**    Sequence coverage %: **49**

NCBI accession No.: **gi| 219563256**

Matched peptides No.: **5**

Total peptides No.: **17**

Calculated Mr: **9397**

Calculated pI: **5.33**

### Annotated PMF spectra:

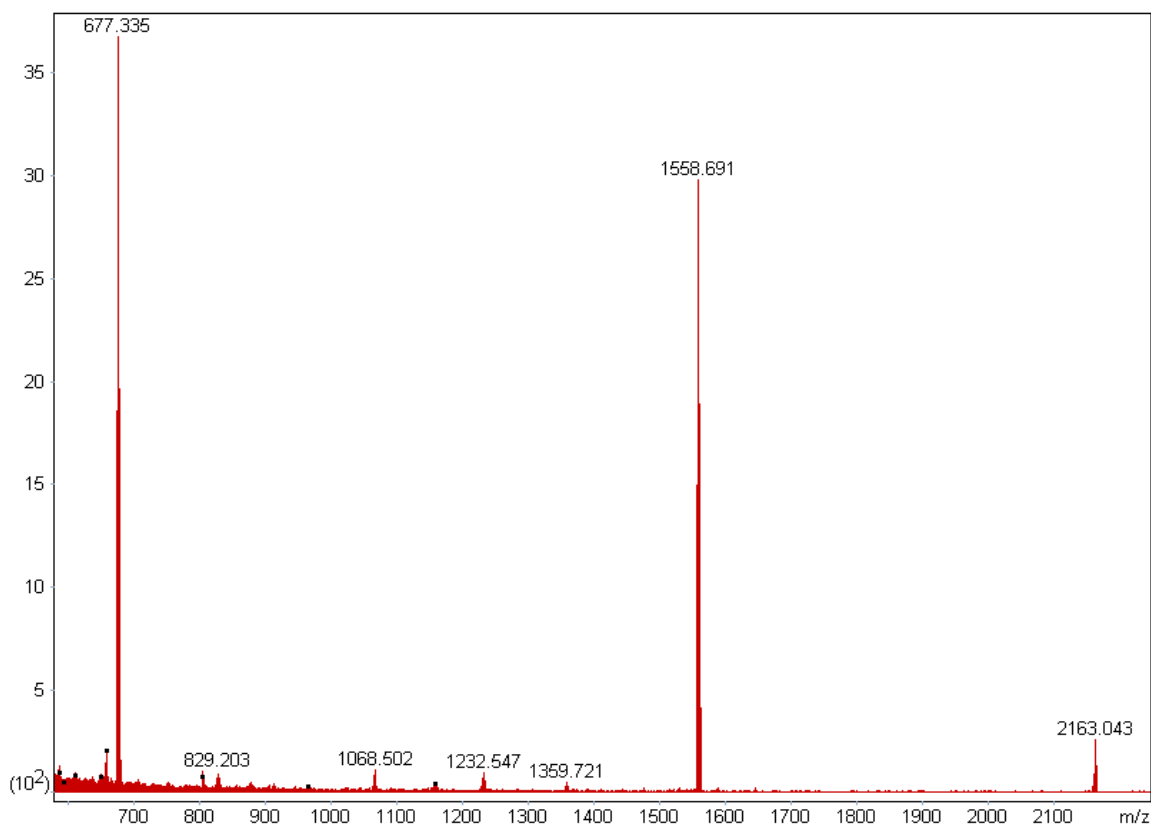

### Probability Based Mowse Score:

Protein score is  $-10 \cdot \log(P)$ , where  $P$  is the probability that the observed match is a random event. Protein scores greater than 72 are significant ( $p < 0.05$ ).

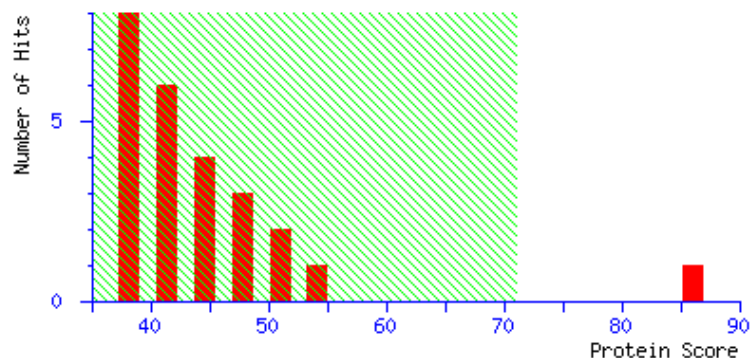

Matched peptide sequences: shown in **Bold Red**

1 VSVFGNDVDA **YEEKLLSGES GISLIDRFDA SKFPTRFGGQ** IRGFSSEGYI  
51 **DGKNER**RLDD CLKYCIVAGK KALESANLGG DKLNT

Matched peptides information:

| Start - End | Observed  | Mr(expt)  | Mr(calc)  | ppm | Miss | Sequence           |
|-------------|-----------|-----------|-----------|-----|------|--------------------|
| 15 - 27     | 1359.7214 | 1358.7141 | 1358.7405 | -19 | 0    | K.LLSGESGISLIDR.F  |
| 28 - 36     | 1068.5019 | 1067.4946 | 1067.5400 | -42 | 1    | R.FDASKFPTR.F      |
| 37 - 42     | 677.3347  | 676.3275  | 676.3657  | -56 | 0    | R.FGGQIR.G         |
| 43 - 53     | 1159.4607 | 1158.4534 | 1158.5193 | -57 | 0    | R.GFSSEGYIDGK.N    |
| 43 - 56     | 1558.6914 | 1557.6841 | 1557.7059 | -14 | 1    | R.GFSSEGYIDGKNER.R |

Spot No.: **115**

Mascot score: **116** Sequence coverage %: **20**

NCBI accession No.: **gi| 15231702**

Matched peptides No.: **12**

Total peptides No.: **26**

Calculated Mr: **46629**

Calculated pI: **6.41**

### Annotated PMF spectra:

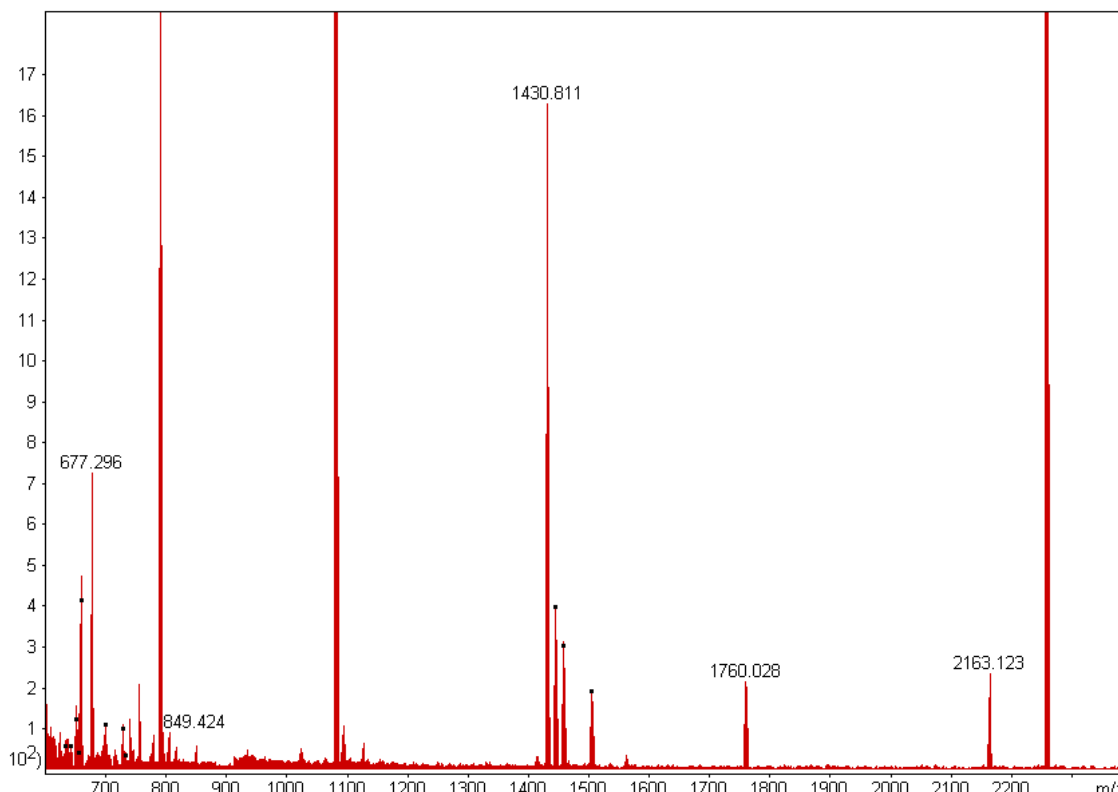

### Probability Based Mowse Score:

Protein score is  $-10 \cdot \log(P)$ , where P is the probability that the observed match is a random event. Protein scores greater than 72 are significant ( $p < 0.05$ ).

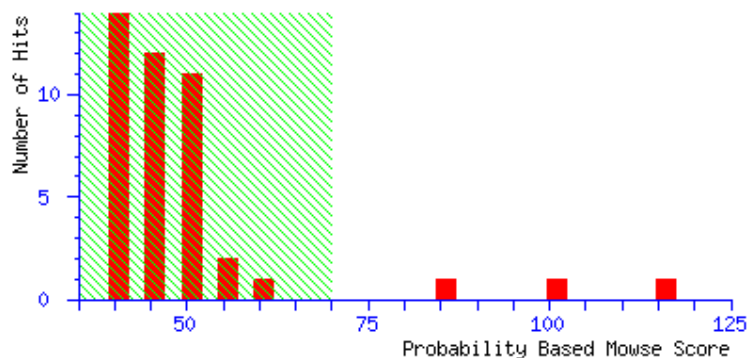

Matched peptide sequences: shown in **Bold Red**

```

1 MAEKSFKYII LGGGVSAGYA AKEFANQGVQ PGELAVISKE AVAPYERPAL
51 SKGYLFPEGA ARLPGFHCCV GSNGEKLLE SYKQKGIELI LSTEIVKADL
101 SAKSLVSATG DVFKYQTLII ATGSTVLRLT DFGVKGADSK NILYLREIDD
151 ADKLVEAIKA KKGGKAVVVG GGYIGLELSA VLRINNLDVT MVFPEPWCMF
201 RLFTADIAAF YETYYTNKGV KIIKGTVASG FTAQPNGEVK EVQLKDGRTL
251 EADIVIVGVG AKPLTSLFKG QVEEDKGGIK TDAFFKTSVP DVYAVGDVAT
301 FPLKMYGDVR RVEHVDHSRK SAEQAVKAIK AAEGGAAVEE YDYLPPFFYSR
351 SFDLSUQFYG DNVGDSVLFV DSNPSNPKPR FGAYWVQGGK VVGAFMEGGS
401 GDENKALAKV AKARPSAESL DELVKQGISF AAKI

```

Matched peptides information:

| Start - End | Observed  | Mr(expt)  | Mr(calc)  | ppm | Miss | Sequence                  |
|-------------|-----------|-----------|-----------|-----|------|---------------------------|
| 40 - 52     | 1430.8114 | 1429.8041 | 1429.7565 | 33  | 0    | K.EAVAPYERPALS <b>K.G</b> |
| 53 - 62     | 1080.5705 | 1079.5632 | 1079.5400 | 22  | 0    | K.GYLFPEGAAR.L            |
| 63 - 76     | 1504.7349 | 1503.7276 | 1503.6599 | 45  | 0    | R.LPGFHCCVGSNGEK.L        |
| 77 - 83     | 849.4244  | 848.4171  | 848.4643  | -56 | 0    | K.LLPESYK.Q               |
| 129 - 135   | 779.3783  | 778.3710  | 778.4225  | -66 | 0    | R.LTDFGVK.G               |
| 141 - 146   | 791.4518  | 790.4445  | 790.4701  | -32 | 0    | K.NILYLRE.E               |
| 147 - 153   | 805.3919  | 804.3846  | 804.3501  | 43  | 0    | R.EIDDADK.L               |
| 147 - 159   | 1458.8399 | 1457.8326 | 1457.7613 | 49  | 1    | R.EIDDADKLVEAIK.A         |
| 281 - 286   | 728.3374  | 727.3301  | 727.3541  | -33 | 0    | K.TDAFFK.T                |
| 305 - 310   | 740.3357  | 739.3284  | 739.3323  | -5  | 0    | K.MYGDVR.R                |
| 305 - 310   | 756.3039  | 755.2966  | 755.3272  | -41 | 0    | K.MYGDVR.R Oxidation (M)  |
| 321 - 327   | 732.3551  | 731.3479  | 731.3813  | -46 | 0    | K.SAEQAVK.A               |

Spot No.: **116**

Mascot score: **113**    Sequence coverage %: **26**

NCBI accession No.: **gi| 15231702**

Matched peptides No.: **11**

Total peptides No.: **25**

Calculated Mr: **46629**

Calculated pI: **6.41**

### Annotated PMF spectra:

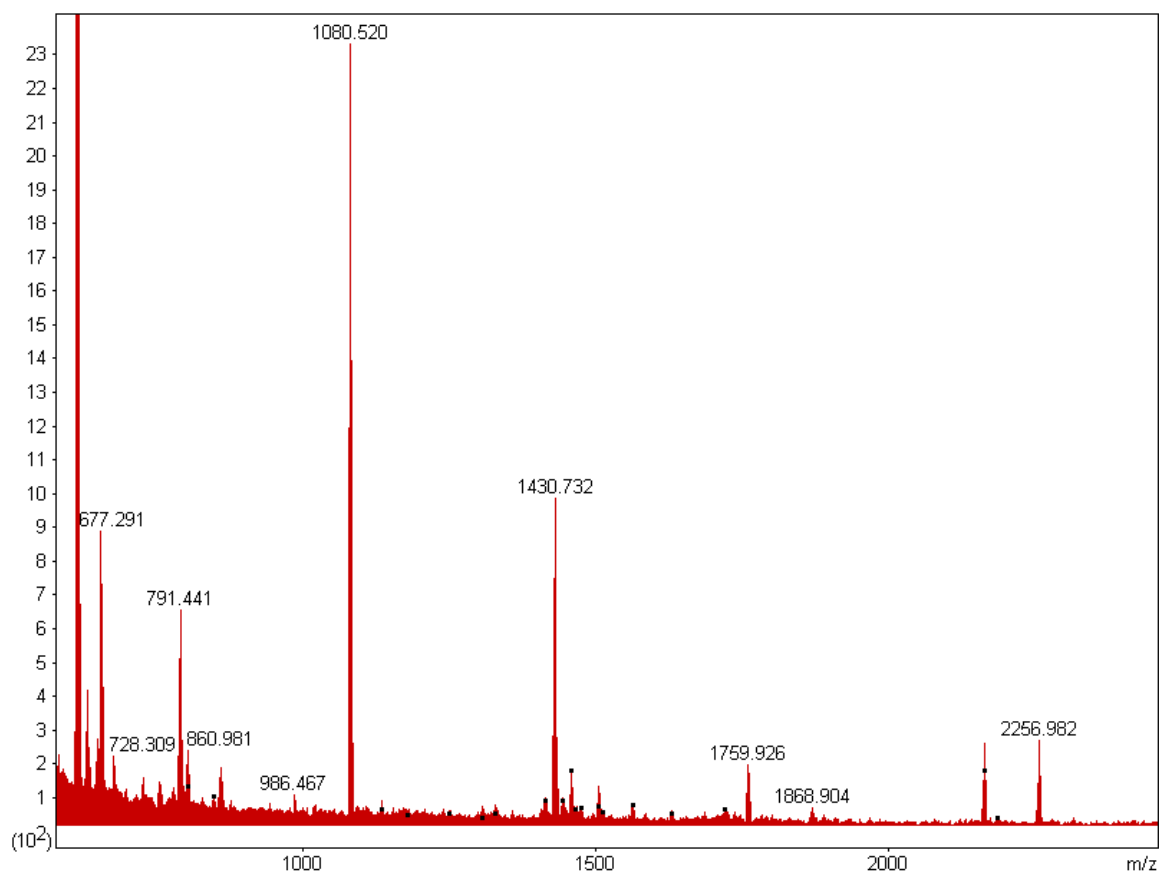

### Probability Based Mowse Score:

Protein score is  $-10 \cdot \log(P)$ , where P is the probability that the observed match is a random event. Protein scores greater than 72 are significant ( $p < 0.05$ ).

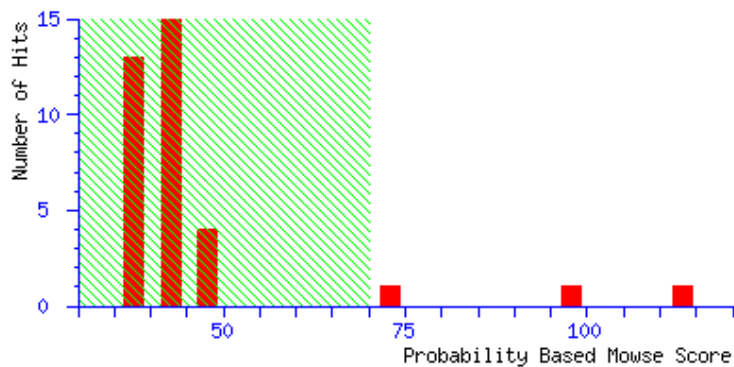



Matched peptide sequences: shown in **Bold Red**

**1** MAEKSFKYII LGGGVSAGYA AKEFANQGVQ PGELAVISKE **AVAPYERPAL**  
**51** **SKGYLFPEGA** **ARLPGFHCCV** **GSGGEKLLPE** SYKQKGIELI LSTEIVKADL  
**101** SAKSLVSATG DVFKYQTLII ATGSTVLRLLT DFGVKGADSK **NILYLREIDD**  
**151** **ADKLVEAIKA** KGGKAVVVG GGYIGLELSA VLRINNL DVT MVFPEPWCMP  
**201** RLFTADIAAF YETYYTNKGV KIIK**GTVASG** **FTAQPNGEVK** EVQLKDGRTL  
**251** EADIVIVGVG AKPLTSLFKG **QVEEDKGGIK** **TDAFFKTSVP** DVYAVGDVAT  
**301** FPLKMYGDVR **RVEHVDHSRK** SAEQAVKAIAK AAEGGA AVEE YDYLPFFYSR  
**351** SFDLSWQFYG DNVGDSVLFV DSNPSNPKPR FGAYWVQGGK **VVGAFMEGGS**  
**401** **GDENK**ALAKV AKARPSAESL DELVKQGISF AAKI

Matched peptides information:

| Start - End | Observed  | Mr(expt)  | Mr(calc)  | ppm  | Miss | Sequence                         |
|-------------|-----------|-----------|-----------|------|------|----------------------------------|
| 40 - 52     | 1430.7323 | 1429.7250 | 1429.7565 | -22  | 0    | K.EAVAPYERPALS.K.G               |
| 53 - 62     | 1080.5204 | 1079.5131 | 1079.5400 | -25  | 0    | K.GYLFPEGAAR.L                   |
| 63 - 76     | 1504.6171 | 1503.6098 | 1503.6599 | -33  | 0    | R.LPGFHCCVGSGEK.L                |
| 77 - 83     | 849.4025  | 848.3952  | 848.4643  | -81  | 0    | K.LLPESYK.Q                      |
| 141 - 146   | 791.4414  | 790.4342  | 790.4701  | -45  | 0    | K.NILYLR.E                       |
| 147 - 159   | 1458.7461 | 1457.7388 | 1457.7613 | -15  | 1    | R.EIDDADKLVEAIK.A                |
| 225 - 240   | 1562.7090 | 1561.7017 | 1561.7737 | -46  | 0    | K.GTVASGFTAQPNGEVK.E             |
| 270 - 276   | 804.2585  | 803.2513  | 803.3661  | -143 | 0    | K.QQVEEDK.G                      |
| 281 - 286   | 728.3087  | 727.3015  | 727.3541  | -72  | 0    | K.TDAFFK.T                       |
| 311 - 319   | 1134.5621 | 1133.5548 | 1133.5690 | -13  | 1    | R.RVEHVDHSR.K                    |
| 391 - 405   | 1512.6267 | 1511.6194 | 1511.6562 | -24  | 0    | K.VVGAFMEGGSDENK.A Oxidation (M) |

Spot No.: **117**

Mascot score: **81**    Sequence coverage %: **17**

NCBI accession No.: **gi| 15226489**

Matched peptides No.: **6**

Total peptides No.: **13**

Calculated Mr: **35330**

Calculated pI: **6.16**

### Annotated PMF spectra:

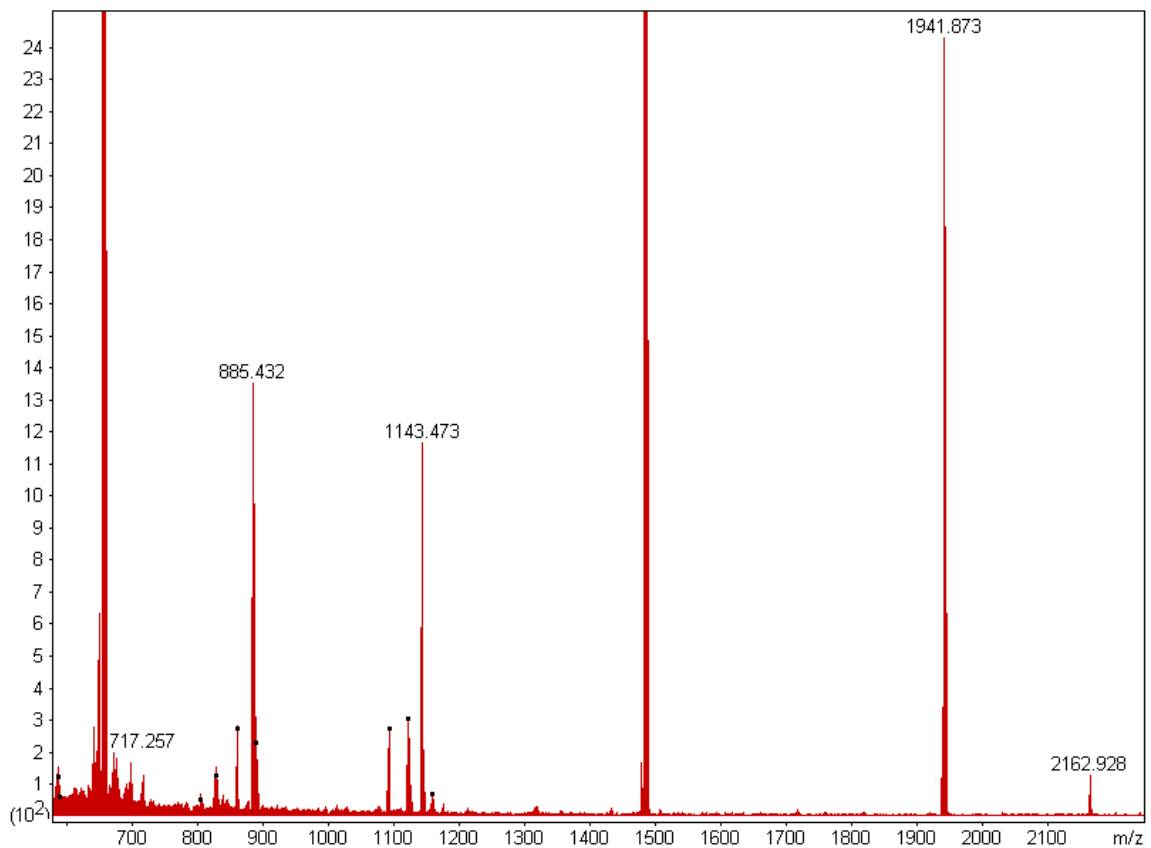

### Probability Based Mowse Score:

Protein score is  $-10 \cdot \log(P)$ , where P is the probability that the observed match is a random event.  
Protein scores greater than 72 are significant ( $p < 0.05$ ).

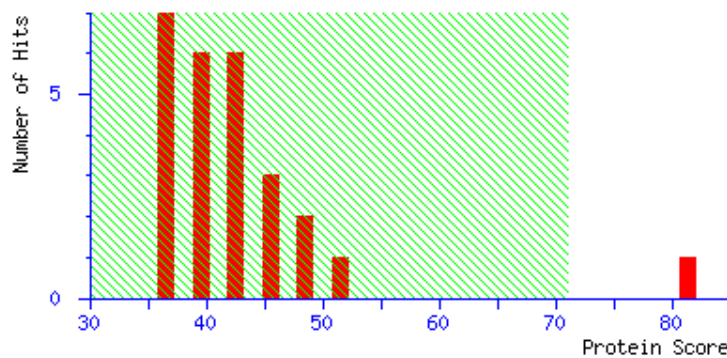

Matched peptide sequences: shown in **Bold Red**

**1** MEITLNSGFK **MPIVGLGWR** MEKEGIRDLI LNAIKIGYRH LDCAADYRNE  
**51** TEVGDALTEA FKTGLVK**RED** **LFITTK**LWNS DHGHVIEACK DSLKKLQLDY  
**101** LDLFLVHFPV ATKHTGVGTT DSALGDDGVL DIDTTISLET TWHDM**EKLVS**  
**151** **MGLVRSIGIS** **HYDVFLTR**DC LAYSKIKPAV NQIETHPYFQ RDSL**VKFCQK**  
**201** HGICVTAHTP LGGATANAEW FGTVSCLDDP VLKDVAEKYK **KTVAQVLRW**  
**251** **GIQR**KTVVIP KTSKPARLEE NFQVDFELS KEDMEVIKSM ERKYRTNQPA  
**301** KFWNIDLYA

Matched peptides information:

| Start - End | Observed  | Mr(expt)  | Mr(calc)  | ppm  | Miss | Sequence          |               |
|-------------|-----------|-----------|-----------|------|------|-------------------|---------------|
| 11 - 20     | 1143.4733 | 1142.4660 | 1142.6270 | -141 | 0    | K.MPIVGLGWR.M     | Oxidation (M) |
| 68 - 76     | 1122.4540 | 1121.4467 | 1121.6081 | -144 | 1    | K.REDLFITTK.L     |               |
| 148 - 155   | 890.3793  | 889.3720  | 889.5055  | -150 | 0    | K.LVSMGLVR.S      | Oxidation (M) |
| 156 - 168   | 1484.6118 | 1483.6045 | 1483.7671 | -110 | 0    | R.SIGISNYDVFLTR.D |               |
| 242 - 249   | 885.4319  | 884.4246  | 884.5444  | -135 | 0    | K.TVAQVLR.W       |               |
| 250 - 254   | 659.2794  | 658.2721  | 658.3551  | -126 | 0    | R.WGIQR.K         |               |

Spot No.: **118**

Mascot score: **97** Sequence coverage %: **38**

NCBI accession No.: **gi| 312281559**

Matched peptides No.: **14**

Total peptides No.: **49**

Calculated Mr: **38617**

Calculated pI: **5.90**

### Annotated PMF spectra:

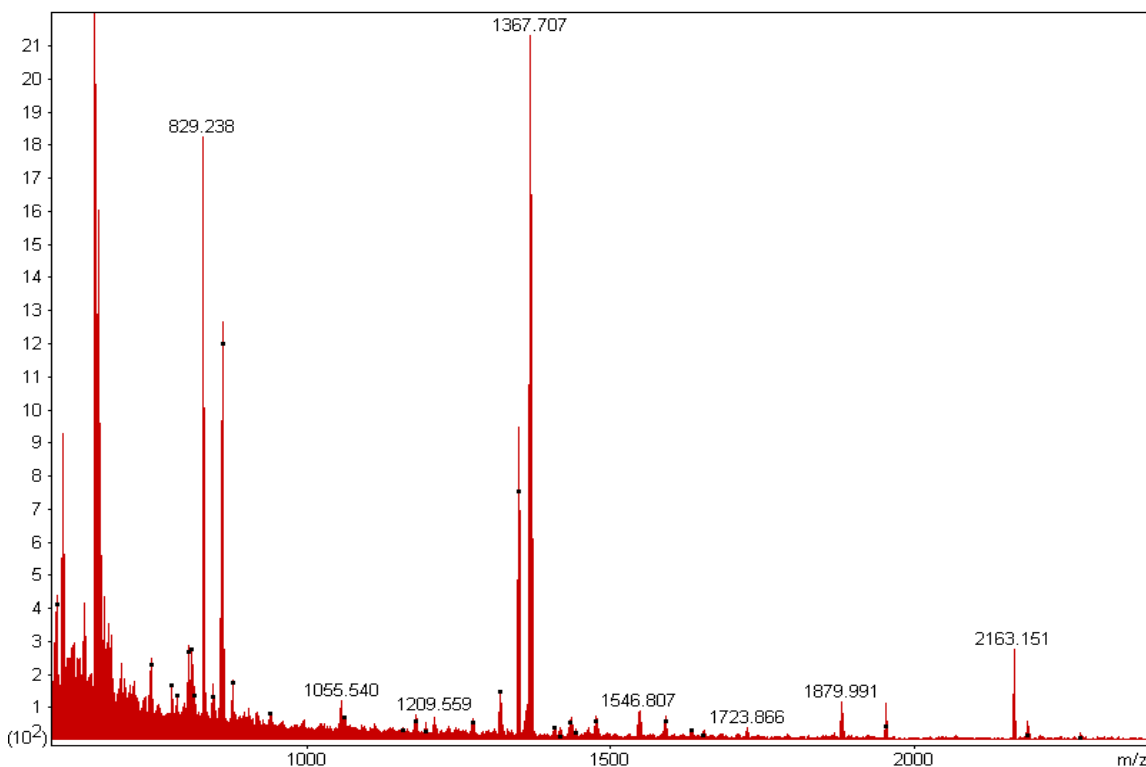

### Probability Based Mowse Score:

Protein score is  $-10 \cdot \log(P)$ , where P is the probability that the observed match is a random event. Protein scores greater than 72 are significant ( $p < 0.05$ ).

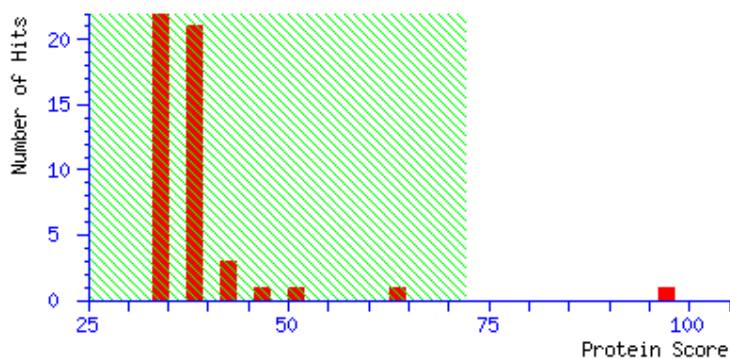

Matched peptide sequences: shown in **Bold Red**

```

1  MADSCGLKRM  KLGSGGLEVS  AQGLGCMSSLS  AFYGVPKPET  EAIALLHHAI
51  DSGITFLDTS  DMYGPHTNEL  LVGKALKNGM  REKVELASKF  GIIYTDVKLE
101 IKGDPAYVRA  SCEASLKRLD  VECIDLYYQH  RIDTCVPIEI  TMGELKKLVE
151 EGKIKYIGLS  EASASTIRRA  HAVHPITAVQ  LEWSLWARDV  EDDIVPTCRE
201 LGIGIVAYSP  LGKGFASGP  KLVENLNND  FRKRLPRFQQ  ENLDHNKILY
251 EKVCAMSEKK  GCTPAQLALA  WVHHQGDDVC  PIPGTTRIEI  FNQNIGALSV
301 KLTPEEMAEL  EAISQPESVK  GERYMAMVPT  YKNSDTPPLS  SWKTA

```

Matched peptides information:

| Start - End | Observed  | Mr (expt) | Mr (calc) | ppm | Miss | Sequence                  |
|-------------|-----------|-----------|-----------|-----|------|---------------------------|
| 75 - 81     | 805.3887  | 804.3814  | 804.4276  | -57 | 1    | K.ALKNGMR.E Oxidation (M) |
| 84 - 98     | 1682.8561 | 1681.8488 | 1681.9291 | -48 | 1    | K.VELASKFGIIYTDVK.L       |
| 90 - 98     | 1055.5399 | 1054.5326 | 1054.5699 | -35 | 0    | K.FGIIYTDVK.L             |
| 103 - 109   | 777.3403  | 776.3331  | 776.3817  | -63 | 0    | K.GDPAYVR.A               |
| 118 - 131   | 1879.9907 | 1878.9834 | 1878.9046 | 42  | 1    | K.RLDVECIDLYYQHR.I        |
| 119 - 131   | 1723.8652 | 1722.8579 | 1722.8035 | 32  | 0    | R.LDVECIDLYYQHR.I         |
| 156 - 168   | 1367.7067 | 1366.6994 | 1366.7092 | -7  | 0    | K.YIGLSEASASTIR.R         |
| 170 - 188   | 2185.1561 | 2184.1488 | 2184.1592 | -5  | 0    | R.AHAVHPITAVQLEWSLWAR.D   |
| 189 - 199   | 1318.5768 | 1317.5695 | 1317.5871 | -13 | 0    | R.DVEDDIVPTCR.E           |
| 200 - 213   | 1416.8016 | 1415.7943 | 1415.8024 | -6  | 0    | R.ELGIGIVAYSPLGK.G        |
| 214 - 221   | 810.3715  | 809.3643  | 809.4072  | -53 | 0    | K.GFFASGPK.L              |
| 222 - 232   | 1347.6402 | 1346.6329 | 1346.6579 | -19 | 0    | K.LVENLNNDFR.K            |
| 222 - 233   | 1475.7471 | 1474.7398 | 1474.7528 | -9  | 1    | K.LVENLNNDFRK.R           |
| 288 - 301   | 1546.8067 | 1545.7994 | 1545.8151 | -10 | 0    | R.IENFNQNIGALSVK.L        |

Spot No.: **119**

Mascot score: **129** Sequence coverage %: **30**

NCBI accession No.: **gi| 15226610**

Matched peptides No.: **13**

Total peptides No.: **33**

Calculated Mr: **39815**

Calculated pI: **5.80**

### Annotated PMF spectra:

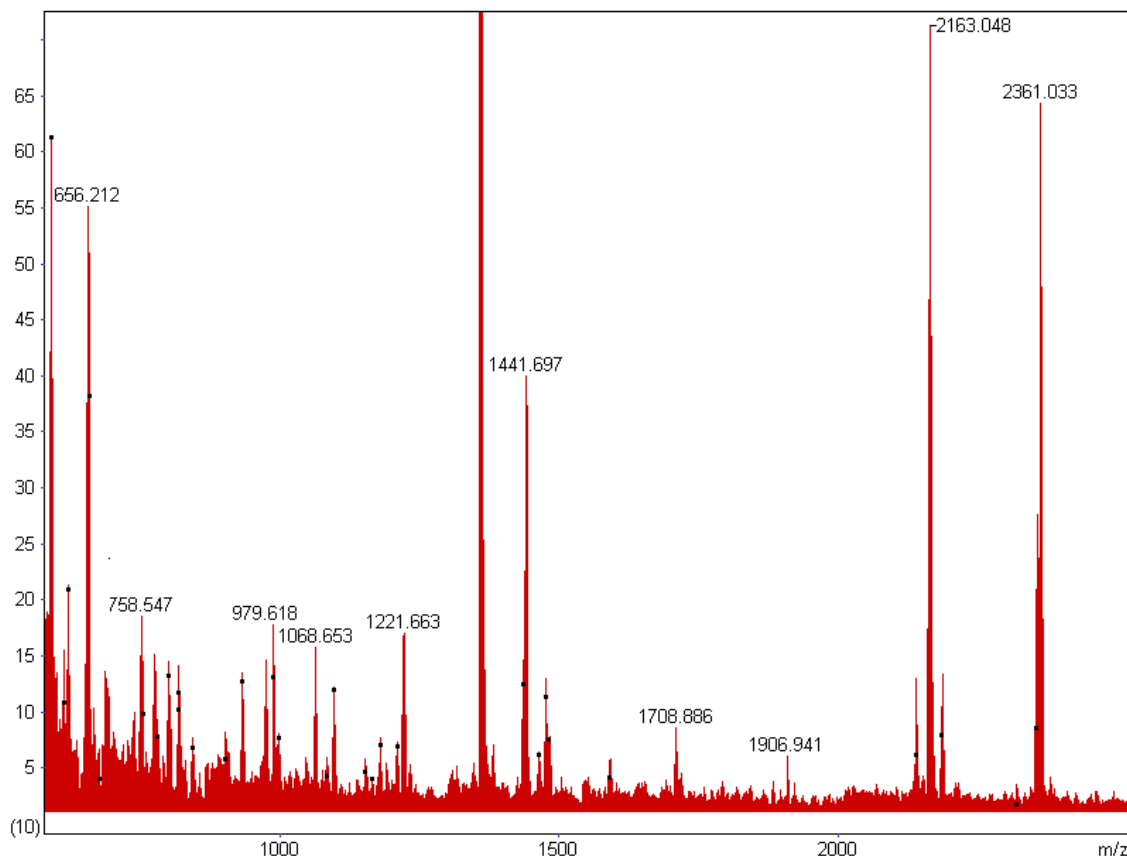

### Probability Based Mowse Score:

Protein score is  $-10 \cdot \log(P)$ , where P is the probability that the observed match is a random event. Protein scores greater than 72 are significant ( $p < 0.05$ ).

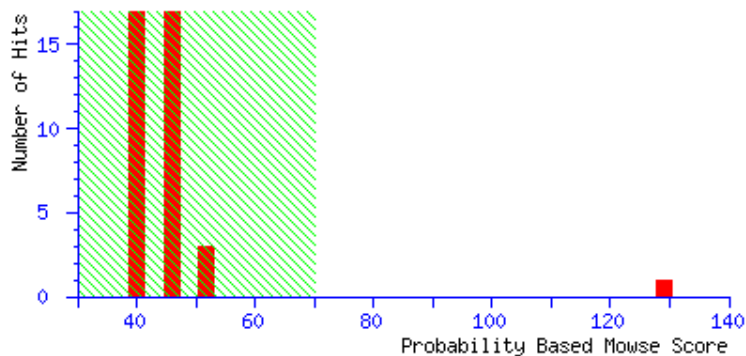

Matched peptide sequences: shown in **Bold Red**

```

1  MAKSQIWFGF ALLALLLVSA VADDVWVLTD DSFEKEVVGKD KGALVEFYAP
51 WCGHCKKLAP EYEKLGASFK KAKSVLIAKV DCDEQKSVCT KYGVSGYPTI
101 QWFPKGSLEP QKYEGPRNAE ALAEYVNKEG GTNVKLAAVP QNVVVLTPDN
151 FDEIVLDQNK DVLVEFYAPW CGHCKSLAPT YEKVATVFKQ EEGVVIANLD
201 ADAHKALGEK YGVSGFPTLK FFPKDNKAGH DYDGGRDLDD FVSFINEKSG
251 TSRDSKGQLT SKAGIVESLD ALVKELVAAS EDEKKAVLSR IEEEEASTLKG
301 STRYGKLYL KLAKSYIEKG SDYASKETER LGRVLGKISIS PVKADELTLK
351 RNILTTFVAS S

```

Matched peptides information:

| Start - End | Observed  | Mr(expt)  | Mr(calc)  | ppm | Miss | Sequence                           |
|-------------|-----------|-----------|-----------|-----|------|------------------------------------|
| 58 - 64     | 849.5003  | 848.4931  | 848.4279  | 77  | 0    | K.LAPEYEK.L                        |
| 106 - 112   | 758.5469  | 757.5396  | 757.3970  | 188 | 0    | K.GSLEPQK.Y                        |
| 106 - 117   | 1360.7583 | 1359.7510 | 1359.6783 | 54  | 1    | K.GSLEPQKYE <b>GPR.N</b>           |
| 113 - 117   | 621.4037  | 620.3964  | 620.2918  | 169 | 0    | K.YEGPR.N                          |
| 118 - 128   | 1221.6631 | 1220.6558 | 1220.6037 | 43  | 0    | R.NAEALAEYVNK.E                    |
| 118 - 135   | 1906.9411 | 1905.9338 | 1905.9432 | -5  | 1    | R.NAEALAEYVNKEGGTNV <b>K.L</b>     |
| 176 - 183   | 908.5459  | 907.5386  | 907.4651  | 81  | 0    | K.SLAP <b>TYEK.V</b>               |
| 184 - 205   | 2354.2067 | 2353.1994 | 2353.2278 | -12 | 1    | K.VATVFKQEEGVVIANLDADAH <b>K.A</b> |
| 190 - 205   | 1708.8858 | 1707.8785 | 1707.8428 | 21  | 0    | K.QEEGVVIANLDADAH <b>K.A</b>       |
| 211 - 220   | 1068.6532 | 1067.6459 | 1067.5652 | 76  | 0    | K.YGVSGFPTLK.F                     |
| 237 - 248   | 1441.6966 | 1440.6893 | 1440.6773 | 8   | 0    | R.DLDDFVSFINEK.S                   |
| 275 - 284   | 1090.6325 | 1089.6252 | 1089.5190 | 98  | 0    | K.ELVAASEDEK.K                     |
| 315 - 326   | 1347.7004 | 1346.6931 | 1346.6354 | 43  | 1    | K.SYIEK <b>GSYASK.E</b>            |

Spot No.: **120**

Mascot score: **85**    Sequence coverage %: **14**

NCBI accession No.: **gi| 1145344987**

Matched peptides No.: **11**

Total peptides No.: **17**

Calculated Mr: **76292**

Calculated pI: **5.49**

### Annotated PMF spectra:

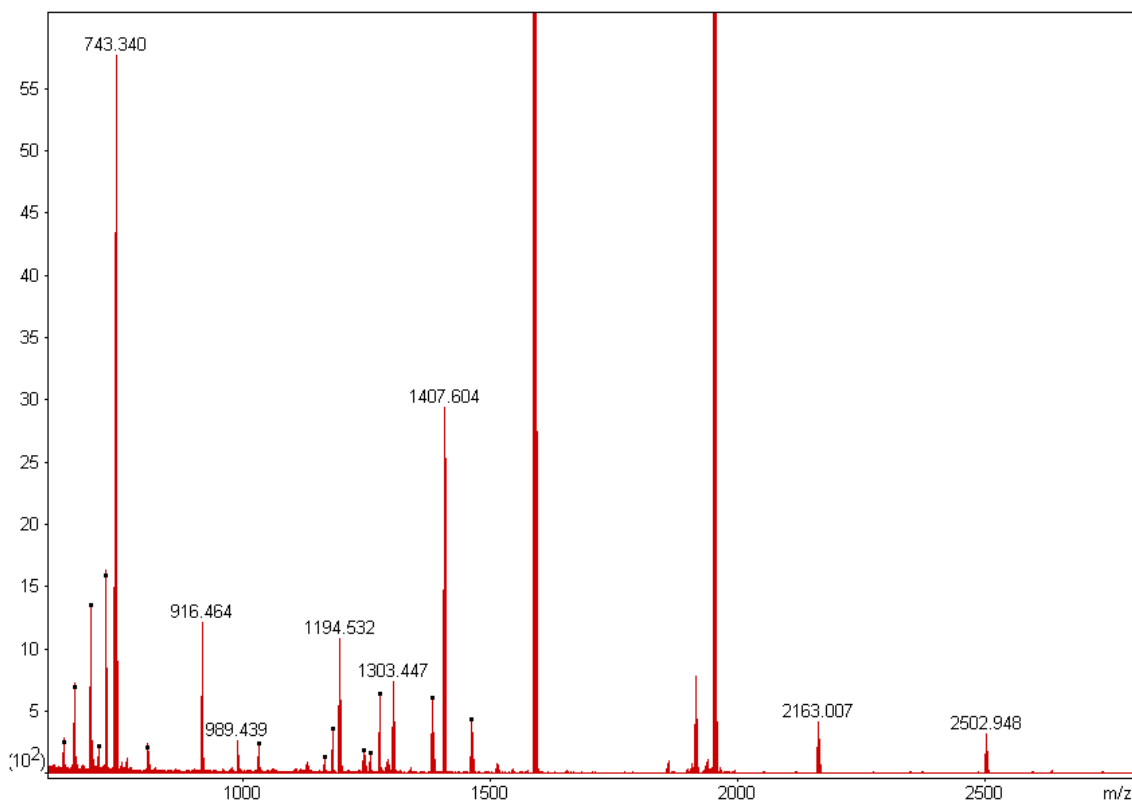

### Probability Based Mowse Score:

Protein score is  $-10 \cdot \log(P)$ , where P is the probability that the observed match is a random event. Protein scores greater than 72 are significant ( $p < 0.05$ ).

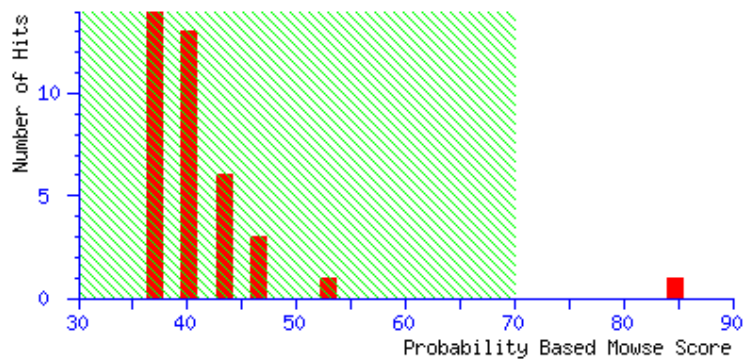



Matched peptide sequences: shown in **Bold Red**

```

1  MGICYSLPDA  AADKARTLAT  AAGTQWSNGL  GASSAAAAKA  ARKAKLTKYA
51  LVKCEFDAET  AAKAKRLSVI REMLFEQIAL WKAWSAGTLP  LDYSVLMHWS
101 KYCHANEECS  KRLRNVALQV  QNASAAHAAY  VNFMTETFIE  GIDETIDVIE
151 EAMNVYELYE  KSEYDYRFAL  KTSKDEEKNA  IKKGEMEIKL QEAKKAINEC
201 AGKVESILVP  LFKRTITELE  NFAKKCMQKR  ERTGEEAIAT  AAKFERANSV
251 AYAKLKKRTY  TAADAITAAK  NAIVDNLPE QLNEINAKLD EMKRHGMALA
301 LIFQDFVPYI  KLIFGPDRMN  IFADELCKKI DGFKSLKKA  AEIHDKIQAL
351 TSEIDVEEFK  RMVEEFEQVV  HTECNTVSSH  STAYVKSLSD  IVKAERALER
401 AENVYKSKAP  NFMPPIGDK  LAKFNDDKAA  WNGALKDAQD AVTIAKERSV
451 ADLNAHKESF  DNLFIKDDST  FHSFIIVAIE  NACAIVTEAH  KTIKAVKARQ
501 IRDAAEEPEA  EEVIEVPEVD  FSQADASQKE  AEVSKAEAEA  KMKEAEAEV
551 KAKEAAEAAE  KARQVAIREE  NEAKQEVLLR  KAAEEAKKAA  EEAKAKQEAE
601 AKAEAAKIQ AEKEAKAEKE  VAKAAKALEQ  QVSIAEKKAE  KEASNAASQQ
651 DAVDAVRDAT  IKETLARASS  VKEVSIANA  ASIGTEL

```

Matched peptides information:

| Start - End | Observed  | Mr(expt)  | Mr(calc)  | ppm  | Miss | Sequence                            |
|-------------|-----------|-----------|-----------|------|------|-------------------------------------|
| 66 - 71     | 743.3400  | 742.3328  | 742.4813  | -200 | 1    | <b>K.RLSVIR.E</b>                   |
| 72 - 82     | 1407.6035 | 1406.5962 | 1406.7268 | -93  | 0    | <b>R.EMLFEQIALWK.A</b>              |
| 184 - 194   | 1275.5158 | 1274.5085 | 1274.6540 | -114 | 1    | <b>K.GEMEIKLQEAK.K</b>              |
| 271 - 288   | 1951.9251 | 1950.9178 | 1951.0010 | -43  | 0    | <b>K.NAIVDNLPEQLNEINAK.L</b>        |
| 289 - 294   | 807.3289  | 806.3216  | 806.3956  | -92  | 1    | <b>K.LDEMKR.H</b> Oxidation (M)     |
| 319 - 328   | 1256.5284 | 1255.5211 | 1255.5577 | -29  | 0    | <b>R.MNIFADELCK.K</b> Oxidation (M) |
| 329 - 334   | 707.2374  | 706.2301  | 706.4014  | -242 | 1    | <b>K.KIDGFK.S</b>                   |
| 401 - 406   | 723.2428  | 722.2356  | 722.3599  | -172 | 0    | <b>R.AENVYK.S</b>                   |
| 437 - 446   | 1031.3963 | 1030.3890 | 1030.5295 | -136 | 0    | <b>K.DAQDAVTIAK.E</b>               |
| 492 - 497   | 659.2690  | 658.2618  | 658.4377  | -267 | 1    | <b>K.TIKAVK.A</b>                   |
| 609 - 616   | 916.4640  | 915.4568  | 915.5025  | -50  | 1    | <b>K.IQAEKEAK.A</b>                 |

Spot No.: **121**

Mascot score: **83**    Sequence coverage %: **22**

NCBI accession No.: **gi| 26450910**

Matched peptides No.: **10**

Total peptides No.: **48**

Calculated Mr: **68864**

Calculated pI: **8.70**

### Annotated PMF spectra:

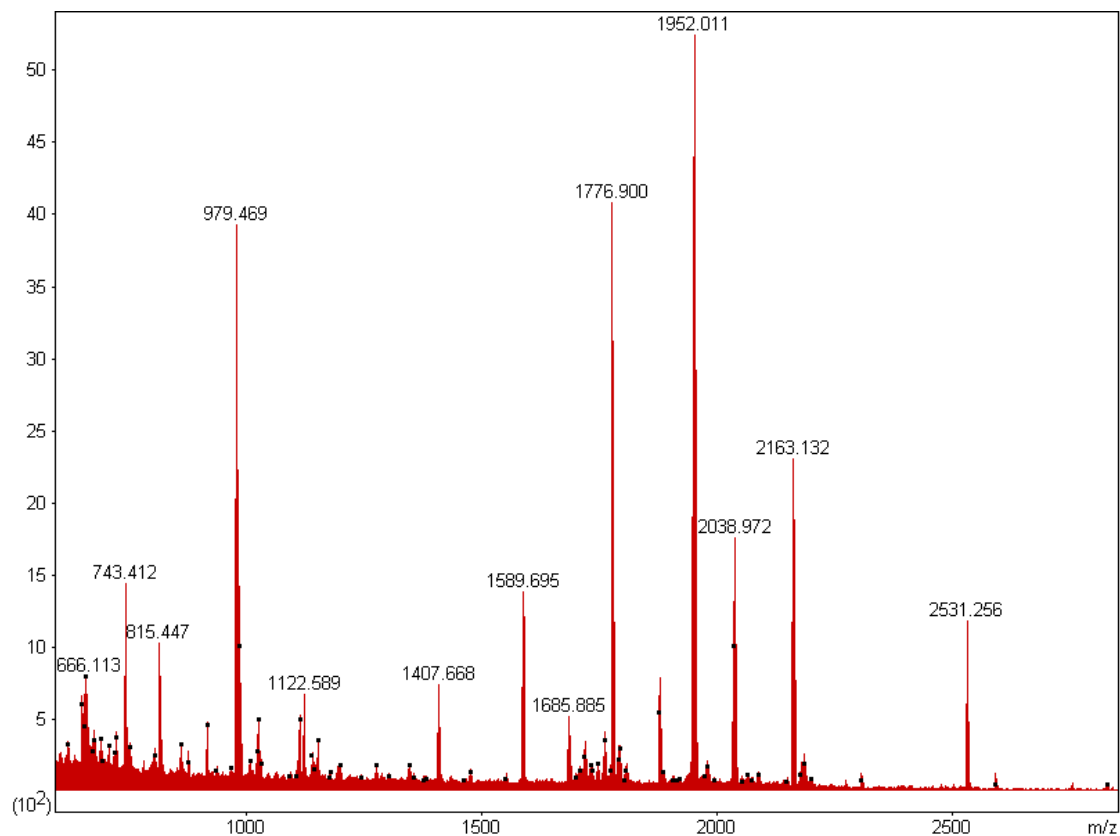

### Probability Based Mowse Score:

Protein score is  $-10 \cdot \log(P)$ , where P is the probability that the observed match is a random event. Protein scores greater than 72 are significant ( $p < 0.05$ ).

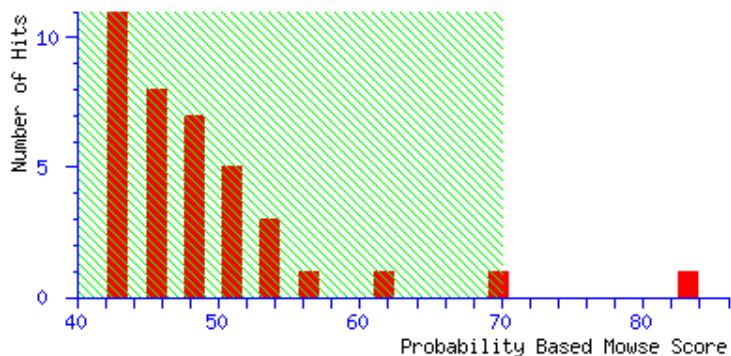

Matched peptide sequences: shown in **Bold Red**

```

1 MLRSLLLRRS VGHSLGTLSP SSSTIRSSFS PHRTLCTTGQ TLTPPPPPPP
51 RPPPPPPATA SEAQFRKYAG YAALAIIFSGV ATYFSFPFPE NAKHKKAQIF
101 RYAPLPEDLH TVSNWSGTHE VQTRNFMQPE NLADLEALVK ESHEKKLRIR
151 PVGSGLSPNG IGLSRSGMVN LALMDKVLEV DKEKKRVTVQ AGIRVQQQLVD
201 AIKDYGLTLQ NFASIREEQQI GGIIQVGAHG TGARLPPIDE QVISMKLVTP
251 AKGTIELSRE KDPELFHLAR CGLGGLGVVA EVTLCQVARH ELVEHTYVSN
301 LQEIKNHKK LLSANKHVKY LYIPYTDTVV VVTCNPVSKW SGPPKDKPKY
351 TTDEAVQHVR DLYRESIVKY RVQDSGKKSP DSSEPDIQEL SFTELKLL
401 ALDPLNDVHV AKVNQAEAEF WKKSEGYRVG WSDEILGFDC GGQQWVSESC
451 FPAGTLANPS MKDLEYIEEL KKLIEKEAIP APAPIEQRWT ARSKSPISPA
501 FSTSEDDIFS WVGIIIMYLPT ADPRHRKDIT DEFFHYRHLT QKQLWDQFSA
551 YEHWAKIEIP KDKEELEALQ ARIRKRFPVD AYNKARELD PNRILSNMW
601 EKLFPVSTTA

```

Matched peptides information:

| Start - End | Observed  | Mr(expt)  | Mr(calc)  | ppm | Miss | Sequence                           |
|-------------|-----------|-----------|-----------|-----|------|------------------------------------|
| 10 - 26     | 1685.8849 | 1684.8776 | 1684.8744 | 2   | 0    | R.SVGHSLGTLSPSSSTIR.S              |
| 166 - 182   | 1878.0779 | 1877.0706 | 1876.9638 | 57  | 1    | R.SGMVNLALMDKVLVDK.E Oxidation (M) |
| 217 - 234   | 1791.8954 | 1790.8881 | 1790.9388 | -28 | 0    | R.EQQIGGIIQVGAHG <b>TGAR.L</b>     |
| 340 - 349   | 1139.5509 | 1138.5436 | 1138.6135 | -61 | 1    | K.WSGPPKDKPK.Y                     |
| 361 - 369   | 1122.5886 | 1121.5813 | 1121.6080 | -24 | 1    | R.DLYRESIVK.Y                      |
| 378 - 396   | 2178.0767 | 2177.0694 | 2177.0488 | 9   | 1    | K.KSPDSSEPDIQEL <b>SFTEL.R</b> .D  |
| 397 - 412   | 1760.9208 | 1759.9135 | 1759.9832 | -40 | 1    | R.DKLLALDPLNDVHVAK.V               |
| 463 - 471   | 1151.5470 | 1150.5397 | 1150.5757 | -31 | 0    | K.DLEYIEELK.K                      |
| 473 - 488   | 1774.9018 | 1773.8945 | 1773.9988 | -59 | 1    | K.LIEKEAIPAPAPIEQR.W               |
| 588 - 593   | 743.4123  | 742.4050  | 742.3609  | 59  | 0    | R.ELDPNR.I                         |

Spot No.: **122**

Mascot score: **126** Sequence coverage %: **40**

NCBI accession No.: **gi| 207667274**

Matched peptides No.: **11**

Total peptides No.: **26**

Calculated Mr: **42520**

Calculated pI: **8.51**

### Annotated PMF spectra:

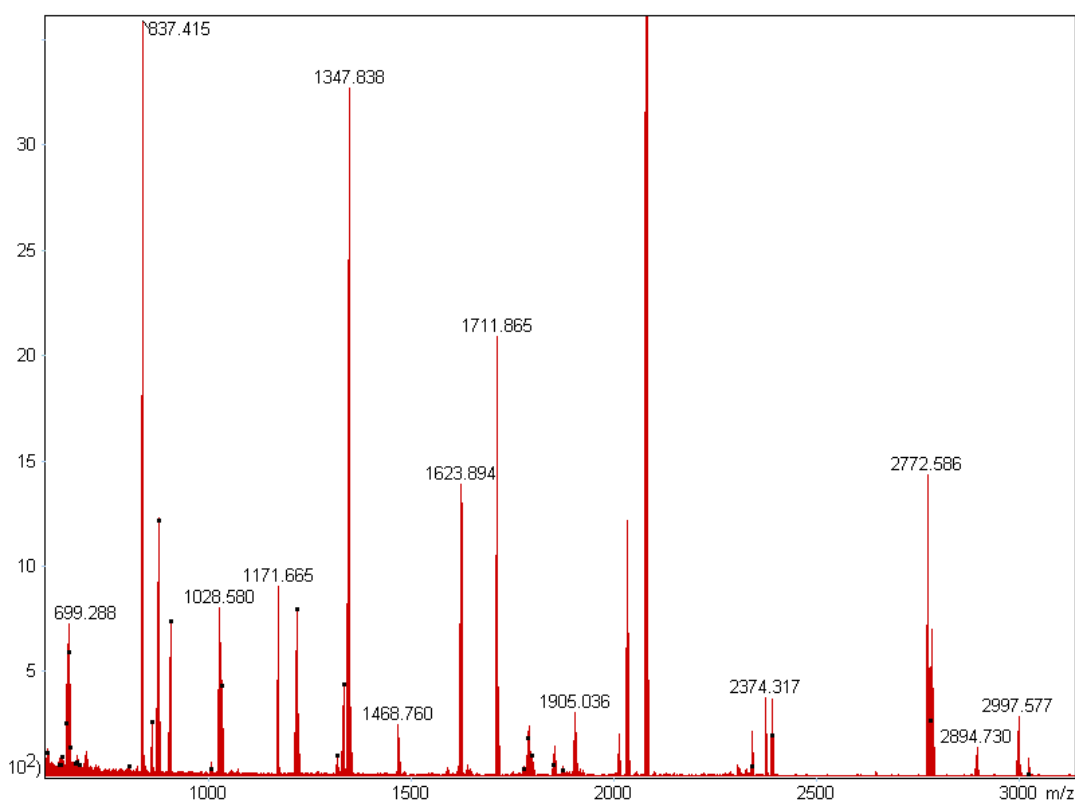

### Probability Based Mowse Score:

Protein score is  $-10 \cdot \log(P)$ , where P is the probability that the observed match is a random event. Protein scores greater than 72 are significant ( $p < 0.05$ ).

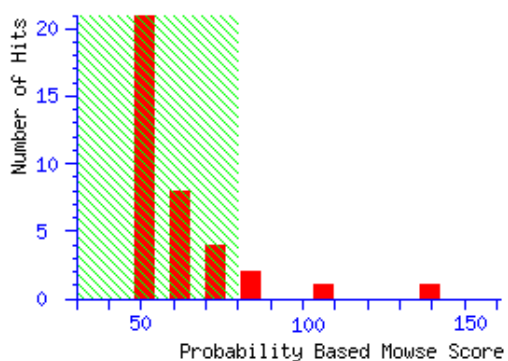

Matched peptide sequences: shown in **Bold Red**

```

1  MAAAASSISIG STVPRASSSS SSSSLPQSRQ QAVNFNYSLP RFTALRSSTL
51  LSGLDSSSFA KSLRGSVTKP QSTDTKPYGL NINASYKVAV LGAAGGIGQP
101 LSELLIKMSPL VSTLHLYDIA NVKGVAADLS HCNTPSQVRD FTGPAELADC
151 LKDVNVVVIP AGVPRKPGMT RDDLFNINAG IVKTLVEAVA DNCPNAFIHI
201 ISNPVNSTVP IAAEVLRRKKG VYDPKKLFGV TTLDVVRANT FVSQKKNLKL
251 IDVDVPVIGG HAGITILPLL SKTKPSVSFT DEEIEKLTVR IQNAGTEVVD
301 AKAGAGSATL SMAYAAARFV ESSLRALDGD GDVYECSEFVD STLTDLPFFA
351 SRIKIGRNGV EAVIESDLQG LTEYEHKALE ALKPELKASI EKGVAFANKP
401 AN

```

Matched peptides information:

| Start - End | Observed  | Mr(expt)  | Mr(calc)  | ppm | Miss | Sequence                         |
|-------------|-----------|-----------|-----------|-----|------|----------------------------------|
| 88 - 106    | 1777.1096 | 1776.1023 | 1776.0873 | 8   | 0    | K.VAVLGAAGGIGQPLSELLIK.M         |
| 124 - 139   | 1711.8653 | 1710.8580 | 1710.8108 | 28  | 0    | K.GVAADLSHCNTPSQVR.D             |
| 153 - 165   | 1334.7995 | 1333.7922 | 1333.7718 | 15  | 0    | K.DVNVVVIPAGVPR.K                |
| 172 - 183   | 1318.6895 | 1317.6822 | 1317.6929 | -8  | 0    | R.DDLFNINAGIVK.T                 |
| 226 - 237   | 1347.8376 | 1346.8303 | 1346.7922 | 28  | 1    | K.KLFGVTTLDVVR.A                 |
| 227 - 237   | 1219.7223 | 1218.7150 | 1218.6972 | 15  | 0    | K.LFGVTTLDVVR.A                  |
| 250 - 272   | 2340.4358 | 2339.4285 | 2339.3828 | 20  | 0    | K.LIDVDVPVIGGHAGITILPLLSK.T      |
| 273 - 290   | 2079.1512 | 2078.1439 | 2078.0895 | 26  | 1    | K.TKPSVSFTDEEIEKLTVR.I           |
| 303 - 318   | 1468.7600 | 1467.7527 | 1467.7140 | 26  | 0    | K.AGAGSATLSMAYAAAR.F             |
| 319 - 325   | 837.4154  | 836.4081  | 836.4392  | -37 | 0    | R.FVESSLR.A                      |
| 326 - 352   | 2997.5770 | 2996.5697 | 2996.3386 | 77  | 0    | R.ALDGDGDVYECSEFVDSTLTDLPFFASR.I |

Spot No.: **123**

Mascot score: **88**    Sequence coverage %: **30**

NCBI accession No.: **gi| 9454574**

Matched peptides No.: **11**

Total peptides No.: **43**

Calculated Mr: **33474**

Calculated pI: **7.03**

### Annotated PMF spectra:

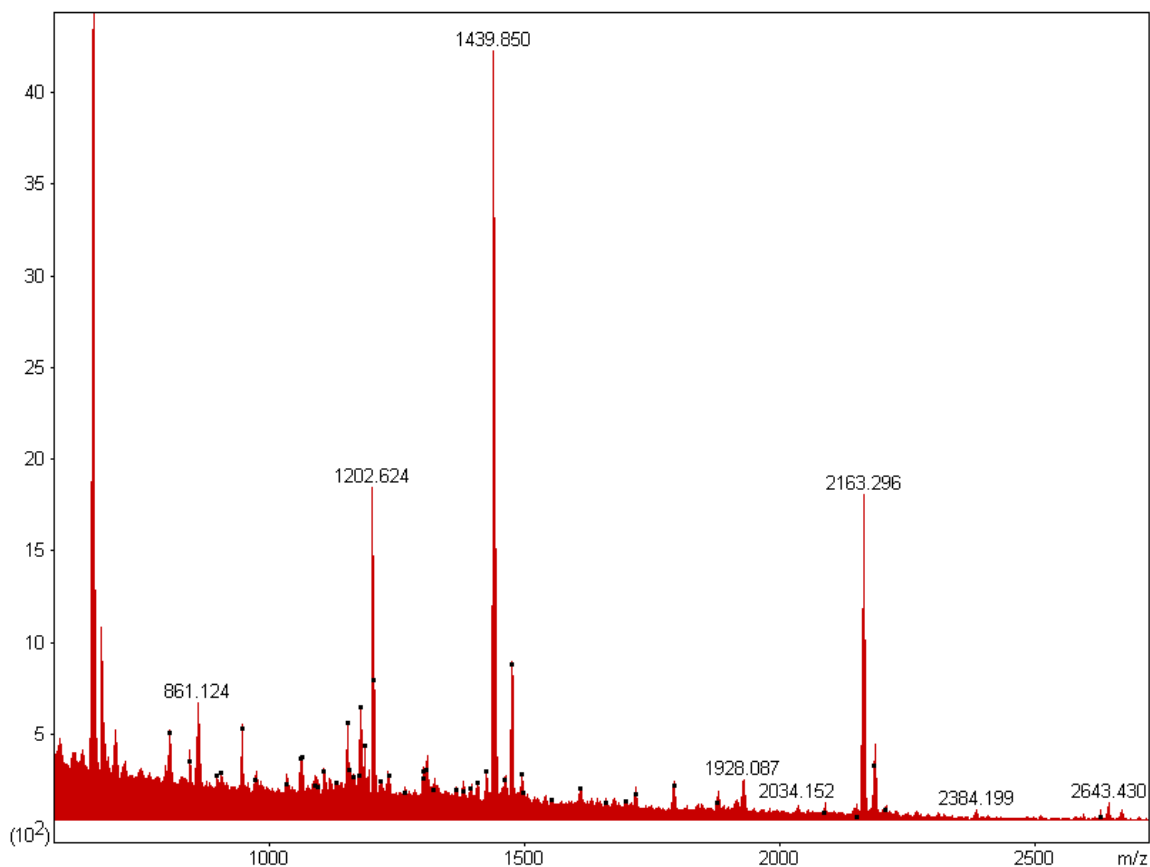

### Probability Based Mowse Score:

Protein score is  $-10 \cdot \log(P)$ , where P is the probability that the observed match is a random event. Protein scores greater than 72 are significant ( $p < 0.05$ ).

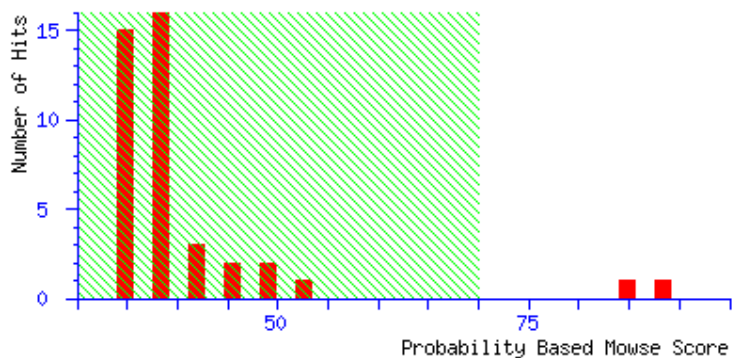

## Matched peptide sequences: shown in **Bold Red**

| Start - End | Observed  | Mr(expt)  | Mr(calC)  | ppm | Miss Sequence                                |
|-------------|-----------|-----------|-----------|-----|----------------------------------------------|
| 9 - 22      | 1439.8495 | 1438.8422 | 1438.7304 | 78  | 0 K.STSLFSSNPTISAK.I                         |
| 169 - 177   | 947.4864  | 946.4791  | 946.4720  | 8   | 0 K.TGLSDAIDR.A                              |
| 178 - 195   | 1928.0870 | 1927.0797 | 1926.8781 | 105 | 0 R.ANLYMEAGADASFVEAPR.D Oxidation (M)       |
| 178 - 201   | 2627.3398 | 2626.3325 | 2626.1857 | 56  | 1 R.ANLYMEAGADASFVEAPRDDDELK.E               |
| 178 - 201   | 2643.4299 | 2642.4226 | 2642.1806 | 92  | 1 R.ANLYMEAGADASFVEAPRDDDELK.E Oxidation (M) |
| 209 - 220   | 1425.8104 | 1424.8031 | 1424.6653 | 97  | 1 K.GYRLCNMLEGGR.T                           |
| 212 - 220   | 1065.5484 | 1064.5411 | 1064.4743 | 63  | 0 R.LCNMLEGGR.T Oxidation (M)                |
| 271 - 279   | 1186.6396 | 1185.6323 | 1185.5488 | 70  | 0 K.MITFEFNR.L                               |
| 271 - 279   | 1202.6240 | 1201.6167 | 1201.5437 | 61  | 0 K.MITFEFNR.L Oxidation (M)                 |
| 280 - 292   | 1609.9718 | 1608.9645 | 1608.8035 | 100 | 0 R.LVNLDWYELETK.Y                           |
| 293 - 304   | 1365.7721 | 1364.7648 | 1364.7048 | 44  | 1 K.YSNLRNALGETK.-                           |

## Matched peptides information:

| Start - End | Observed  | Mr(expt)  | Mr(calC)  | ppm | Miss Sequence                                |
|-------------|-----------|-----------|-----------|-----|----------------------------------------------|
| 9 - 22      | 1439.8495 | 1438.8422 | 1438.7304 | 78  | 0 K.STSLFSSNPTISAK.I                         |
| 169 - 177   | 947.4864  | 946.4791  | 946.4720  | 8   | 0 K.TGLSDAIDR.A                              |
| 178 - 195   | 1928.0870 | 1927.0797 | 1926.8781 | 105 | 0 R.ANLYMEAGADASFVEAPR.D Oxidation (M)       |
| 178 - 201   | 2627.3398 | 2626.3325 | 2626.1857 | 56  | 1 R.ANLYMEAGADASFVEAPRDDDELK.E               |
| 178 - 201   | 2643.4299 | 2642.4226 | 2642.1806 | 92  | 1 R.ANLYMEAGADASFVEAPRDDDELK.E Oxidation (M) |
| 209 - 220   | 1425.8104 | 1424.8031 | 1424.6653 | 97  | 1 K.GYRLCNMLEGGR.T                           |
| 212 - 220   | 1065.5484 | 1064.5411 | 1064.4743 | 63  | 0 R.LCNMLEGGR.T Oxidation (M)                |
| 271 - 279   | 1186.6396 | 1185.6323 | 1185.5488 | 70  | 0 K.MITFEFNR.L                               |
| 271 - 279   | 1202.6240 | 1201.6167 | 1201.5437 | 61  | 0 K.MITFEFNR.L Oxidation (M)                 |
| 280 - 292   | 1609.9718 | 1608.9645 | 1608.8035 | 100 | 0 R.LVNLDWYELETK.Y                           |
| 293 - 304   | 1365.7721 | 1364.7648 | 1364.7048 | 44  | 1 K.YSNLRNALGETK.-                           |

Spot No.: **124**

Mascot score: **94**    Sequence coverage %: **22**

NCBI accession No.: **gi| 22330196**

Matched peptides No.: **8**

Total peptides No.: **12**

Calculated Mr: **41927**

Calculated pI: **6.56**

### Annotated PMF spectra:

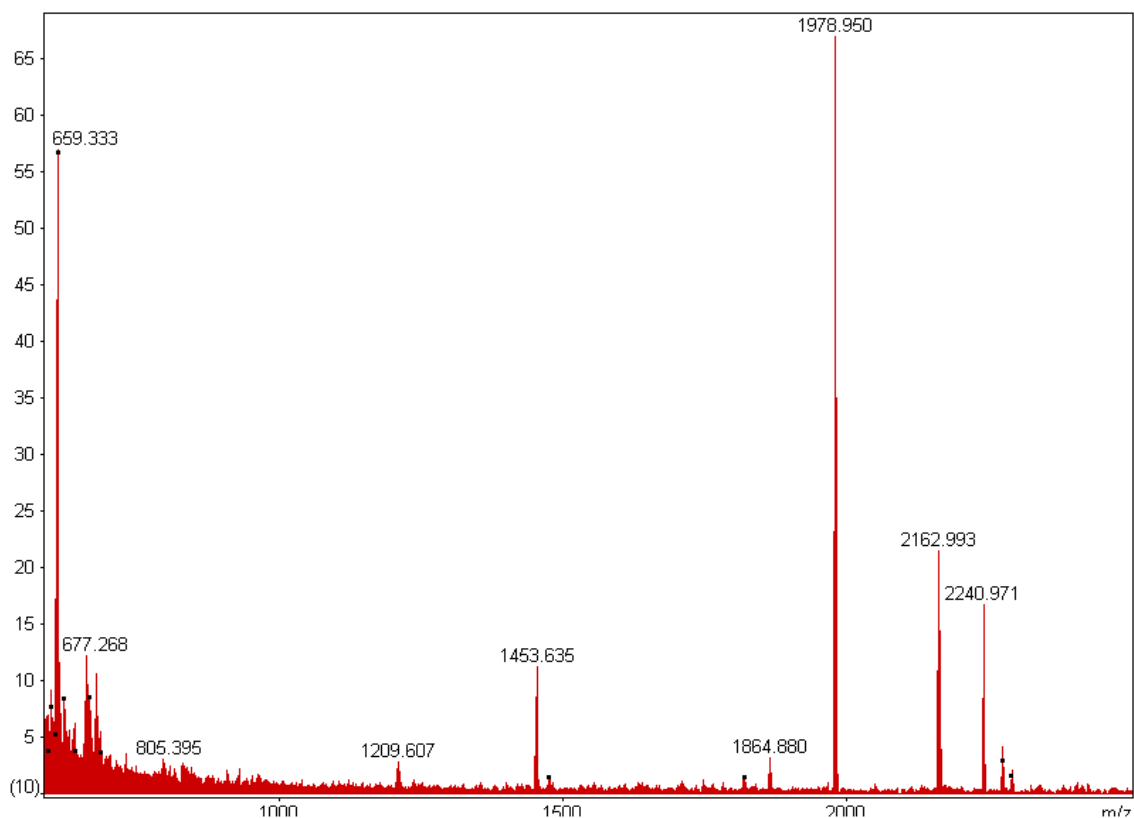

### Probability Based Mowse Score:

Protein score is  $-10 \cdot \log(P)$ , where P is the probability that the observed match is a random event. Protein scores greater than 72 are significant ( $p < 0.05$ ).

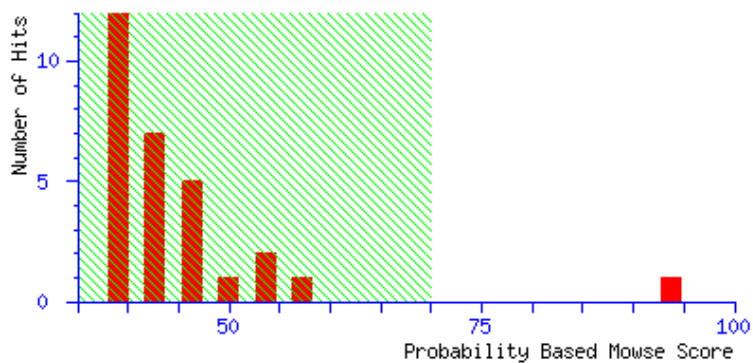



Matched peptide sequences: shown in **Bold Red**

```

1  MSLLSPLPLL HSFSSSTVATK STASRITATP SKIRFSVINA TSENGNSGGG
51  KNDRDEDPSF NPFQFVTDMP SSRSAIQLPE SPAEDGNVGQ MLYRTEDKGG
101 EYGSTIKSGK LRWFVRETGS KESRRGTIVF VHGAPTQSFS YRTVMSELSD
151 AGFHCFAPDW IGFGFSDKPQ PGYGFNYTEK EYHEAFDKLL EVLEVKSPFF
201 LVVQGFLVGS YGLTWALKNP SKVEKLAILN SPLTVSSPVP GLFKQLRIPL
251 FGEFTCQNAI LAERFIEGGS PYVLKNEKAD VYRLPYLSSG GPGFALLETA
301 KKINFGDTLS QIANGFSSGS WDKPTLLAWG IADKYLPQSI AEEFEKQNPQ
351 NVKLRLIEGA GHLPQEDWPE KVVAALRAFF

```

Matched peptides information:

| Start - End | Observed  | Mr(expt)  | Mr(calc)  | ppm  | Miss | Sequence                                |
|-------------|-----------|-----------|-----------|------|------|-----------------------------------------|
| 74 - 94     | 2275.0747 | 2274.0674 | 2274.0950 | -12  | 0    | R.SAIQLPESPAEDGNVGQMLYR.T               |
| 74 - 94     | 2291.0753 | 2290.0680 | 2290.0899 | -10  | 0    | R.SAIQLPESPAEDGNVGQMLYR.T Oxidation (M) |
| 95 - 100    | 677.2677  | 676.2604  | 676.3392  | -116 | 1    | R.TEDKGG.E                              |
| 113 - 116   | 607.3344  | 606.3271  | 606.3278  | -1   | 0    | R.WFVR.E                                |
| 248 - 264   | 1978.9501 | 1977.9428 | 1977.9982 | -28  | 0    | R.IPLFGEFTCQNAILAER.F                   |
| 265 - 275   | 1209.6073 | 1208.6000 | 1208.6441 | -36  | 0    | R.FIEGGSPYVLK.N                         |
| 335 - 346   | 1453.6345 | 1452.6272 | 1452.7136 | -59  | 0    | K.YLPQSIAEEFEK.Q                        |
| 356 - 371   | 1818.8689 | 1817.8616 | 1817.8948 | -18  | 0    | R.LIEGAGHLPQEDWPEK.V                    |

Spot No.: **125**

Mascot score: **98**    Sequence coverage %: **25**

NCBI accession No.: **gi| 5903052**

Matched peptides No.: **10**

Total peptides No.: **28**

Calculated Mr: **42000**

Calculated pI: **6.98**

### Annotated PMF spectra:

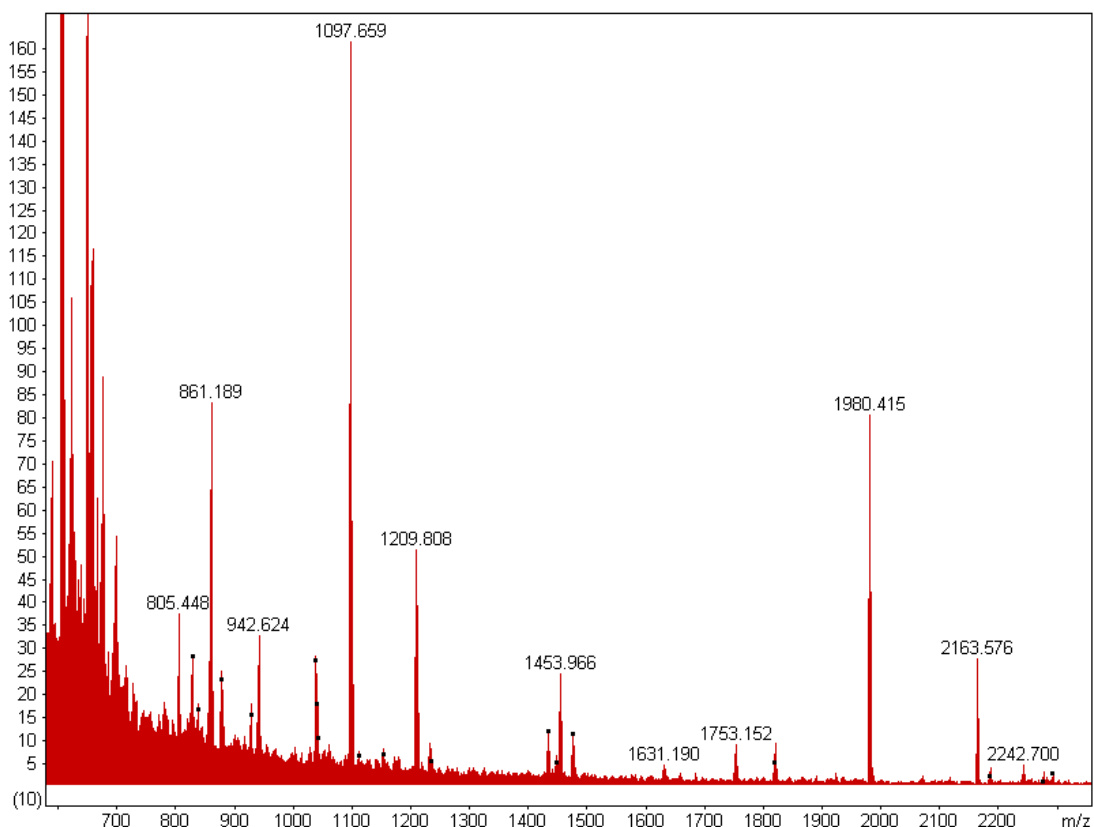

### Probability Based Mowse Score:

Protein score is  $-10 \cdot \log(P)$ , where  $P$  is the probability that the observed match is a random event. Protein scores greater than 72 are significant ( $p < 0.05$ ).

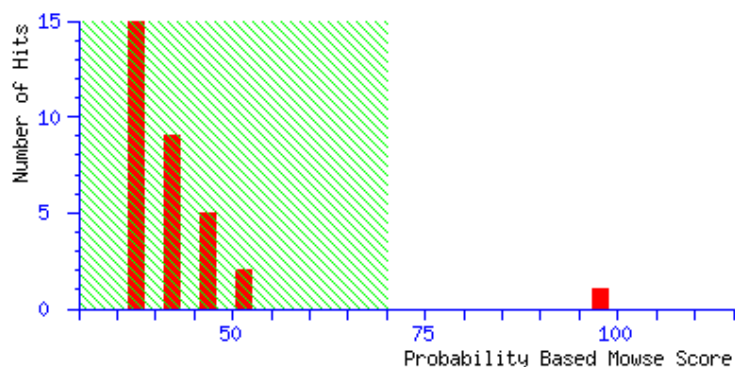

## Matched peptide sequences: shown in **Bold Red**

```

1  MSLLSPLPLL HSFSSSTVATK STASRITATP SKIRFSVINA TSENGNSGG
51  KNDRDEDPSF NPFQFVTDNP SSRSAIQLPE SPAEDGNVGQ MLYRTEDKGK
101 EYGSTIKSGK LRWFVRETGS KESRRGTVF VHGAPTQSFS YRTVMSELS
151 AGFHCFAPDW IGFGFSDKPQ PGYGFNYTEK EYHEAFDKLL EVLEVKSPFF
201 LVVQVRMCSY GLTWALKNPS KVEKLAILNS PLTVSSPVP
L FFKQLRIPLF
251 GEFTCQNAIL AERFIEGGSP YVLKNEKADV YRLPYLSSGG PGFALLE
TAK
301 KINFGDTLSQ IANGFSSGSW DKPTLLAWGI ADKYLPQSLA EEFEKQNPQN
351 VKLRLIEGAG HLPQEDWPEK VVAALRAFF

```

## Matched peptides information:

| Start - End | Observed  | Mr(expt)  | Mr(calc)  | ppm | Miss | Sequence                  |
|-------------|-----------|-----------|-----------|-----|------|---------------------------|
| 74 - 94     | 2275.6566 | 2274.6493 | 2274.0950 | 244 | 0    | R.SAIQLPESPAEDGNVGQMLYR.T |
| 95 - 100    | 677.3239  | 676.3166  | 676.3392  | -33 | 1    | R.TEDKGE                  |
| 113 - 116   | 607.3615  | 606.3542  | 606.3278  | 44  | 0    | R.WFVRE                   |
| 181 - 188   | 1038.5660 | 1037.5587 | 1037.4454 | 109 | 0    | K.EYHEAFDKL               |
| 189 - 196   | 942.6240  | 941.6167  | 941.5797  | 39  | 0    | K.LLEVLEK.S               |
| 264 - 274   | 1209.8080 | 1208.8007 | 1208.6441 | 130 | 0    | R.FIEGGSPYVLK.N           |
| 278 - 282   | 623.3410  | 622.3337  | 622.3075  | 42  | 0    | K.ADVYR.L                 |
| 334 - 345   | 1453.9665 | 1452.9592 | 1452.7136 | 169 | 0    | K.YLPQSLAEFEK.Q           |
| 355 - 370   | 1819.2999 | 1818.2926 | 1817.8948 | 219 | 0    | R.LIEGAGHLPQEDWPEK.V      |
| 371 - 376   | 628.3909  | 627.3836  | 627.4068  | -37 | 0    | K.VVAALR.A                |

Spot No.: **126**

Mascot score: **91**    Sequence coverage %: **28**

NCBI accession No.: **gi| 15242351**

Matched peptides No.: **10**

Total peptides No.: **18**

Calculated Mr: **41377**

Calculated pI: **5.76**

### Annotated PMF spectra:

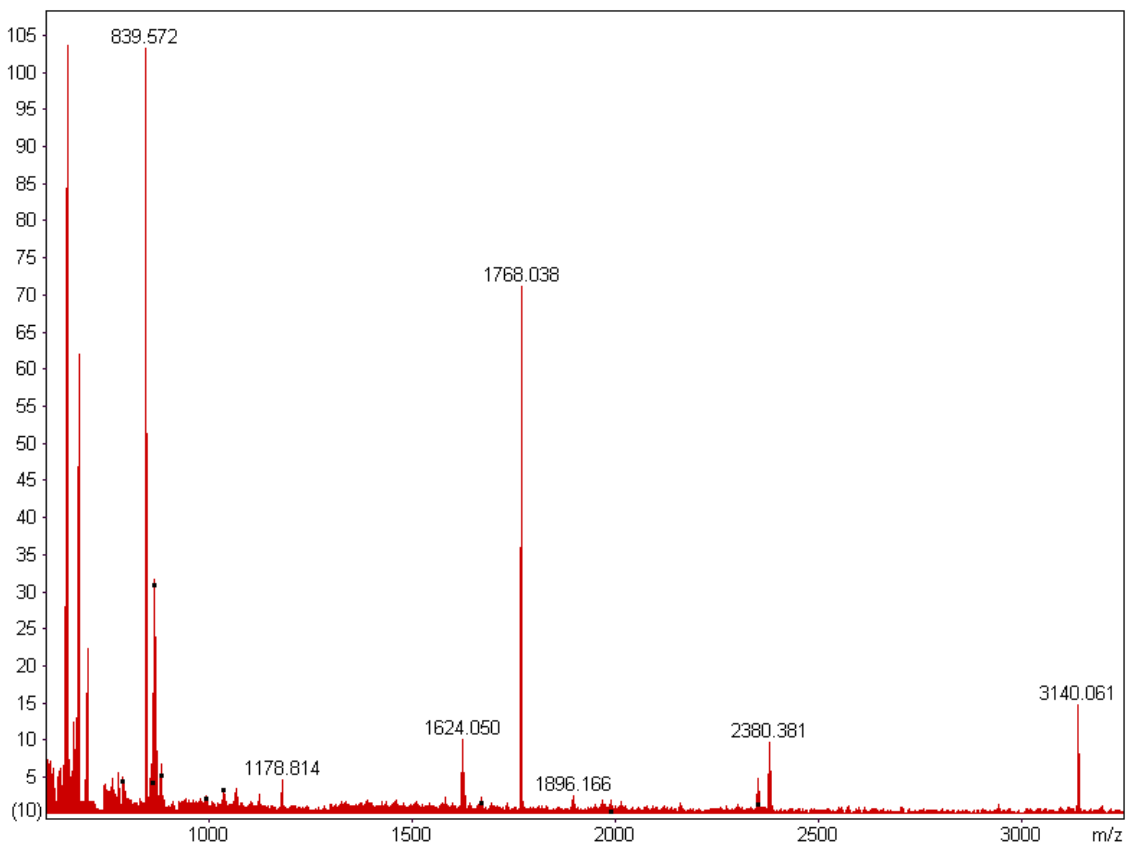

### Probability Based Mowse Score:

Protein score is  $-10 \cdot \log(P)$ , where P is the probability that the observed match is a random event. Protein scores greater than 72 are significant ( $p < 0.05$ ).

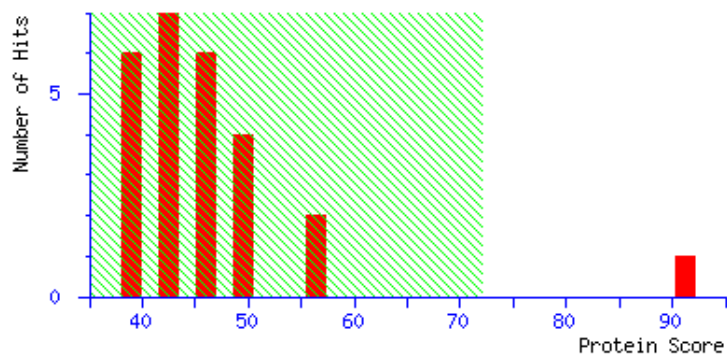

Matched peptide sequences: shown in **Bold Red**

```

1  MVEPANTVGL PVNPTPLLKD ELDIVIPTIR NLDLFLEMWRP FLQPYHLIIV
51 QDGDPSKKIH VPEGYDYELY NRNDINRILG PKASCISFKD SACRCFGYMV
101 SKKKYIFTID DDCFVAKDPS GKAVNALEQH IKNLLCPSSP FFFNTLYDPY
151 REGADFVRGY PFSLRREGVST AVSHGLWLNI PDYDAPTQLV KPKERNTRYV
201 DAVMTIPKGT LFPMCGMNLA FDRDLIGPAM YFGLMGDGQP IGRYDDMWAG
251 WCIKVICDHL SLGVKTGLPY IYHSKASNPV VNLKKEYKGI FWQEEIIPFF
301 QNAKLSKEAV TVQQCYIELS RMVKEKLSSL DPYFDKLADA MVTWIEAWDE
351 LNPPAASGKA

```

Matched peptides information:

| Start - End | Observed  | Mr (expt) | Mr (calc) | ppm  | Miss | Sequence                |
|-------------|-----------|-----------|-----------|------|------|-------------------------|
| 1 - 19      | 1989.1779 | 1988.1706 | 1989.0969 | -266 | 0    | -.MVEPANTVGLPVNPTPLLK.D |
| 58 - 72     | 1896.1659 | 1895.1586 | 1894.9213 | 125  | 1    | K.KIHVPEGYDYELYNR.N     |
| 59 - 72     | 1768.0380 | 1767.0307 | 1766.8264 | 116  | 0    | K.IHVPEGYDYELYNR.N      |
| 59 - 77     | 2380.3810 | 2379.3737 | 2379.1243 | 105  | 1    | K.IHVPEGYDYELYNRNDINR.I |
| 133 - 151   | 2351.2985 | 2350.2912 | 2350.1092 | 77   | 0    | K.NLLCPSSPFFFNTLYDPYR.E |
| 159 - 165   | 839.5719  | 838.5646  | 838.4337  | 156  | 0    | R.GYPFSLR.E             |
| 266 - 275   | 1178.8140 | 1177.8067 | 1177.6131 | 164  | 0    | K.TGLPYIYHSK.A          |
| 276 - 284   | 989.6581  | 988.6509  | 988.5342  | 118  | 0    | K.ASNPFVNLK.K           |
| 308 - 321   | 1668.0968 | 1667.0895 | 1666.8236 | 160  | 0    | K.EAVTVQQCYIELSK.M      |
| 322 - 326   | 650.1518  | 649.1445  | 649.3469  | -212 | 1    | K.MVKEK.L Oxidation (M) |

Spot No.: **127**

Mascot score: **81**    Sequence coverage %: **90**

NCBI accession No.: **gi| 115443951**

Matched peptides No.: **12**

Total peptides No.: **55**

Calculated Mr: **27078**

Calculated pI: **9.30**

### Annotated PMF spectra:

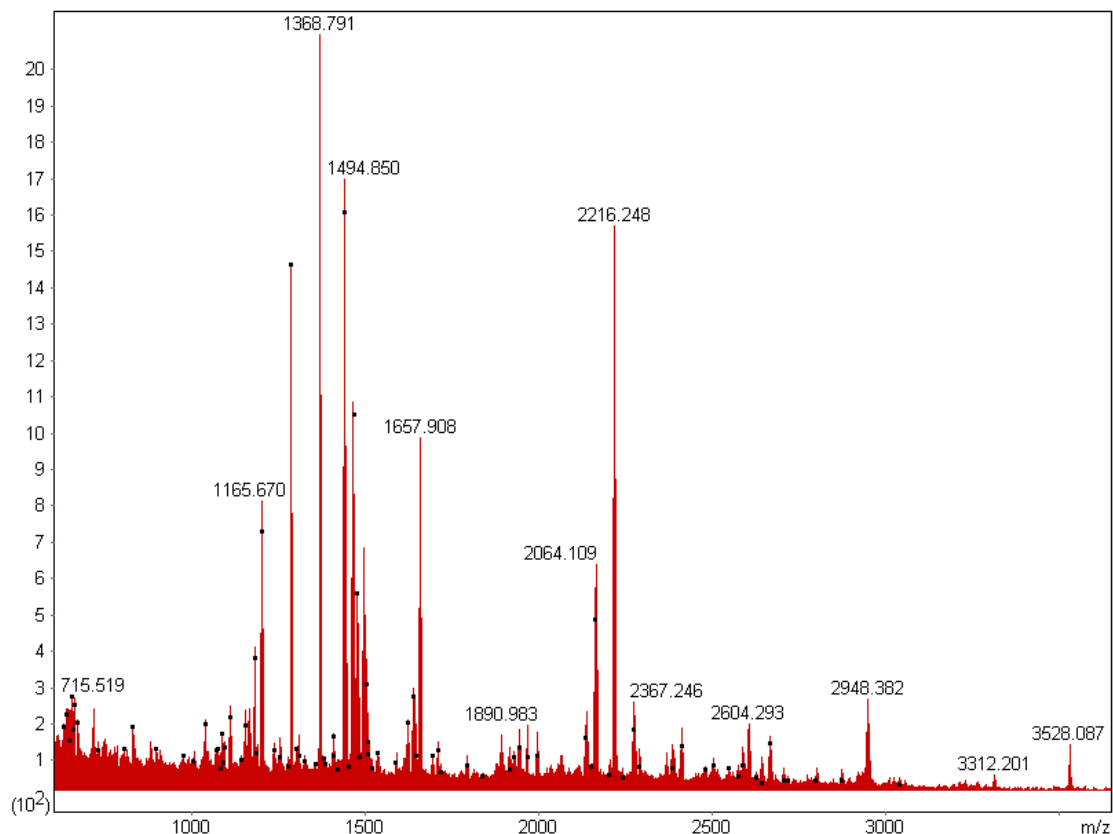

### Probability Based Mowse Score:

Protein score is  $-10 \cdot \log(P)$ , where P is the probability that the observed match is a random event. Protein scores greater than 72 are significant ( $p < 0.05$ ).

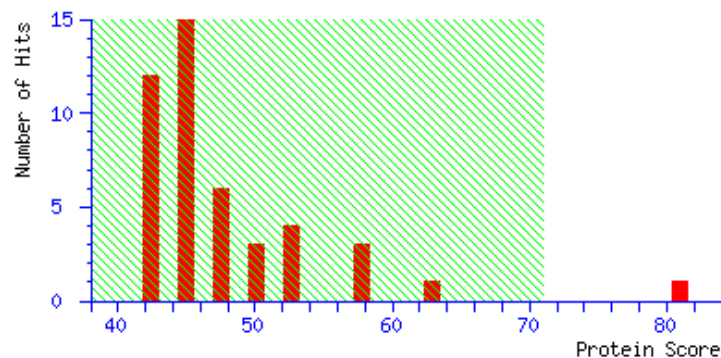

Matched peptide sequences: shown in **Bold Red**

1 **MMPSASDAAA** **AAAALELQES** **GWEELR**REAR KLEGDL DVKL **SSYARLAARS**  
51 **SSAADAASAS** **SPSERSSWKS** **MEFEIQSLLD** KLQDVNDAMS **RCAASTAPT**  
101 **SVSQKLARHR** DILHEFAQEF RRTRGNLSSI **REHADLLSSV** **RDDITESKAT**  
151 **GGMSPRVHLL** **RERASIHGSI** NQIDEVIGQA QSTRVALSNQ RALFGDVQGK  
201 **VKQLGEKFPV** **IRGLLGAIKR** KSKDIIIS AVIAACTIFL IYWLSK

Matched peptides information:

| Start - End | Observed  | Mr(expt)  | Mr(calc)  | ppm | Miss | Sequence                                  |
|-------------|-----------|-----------|-----------|-----|------|-------------------------------------------|
| 1 - 26      | 2705.1697 | 2704.1624 | 2704.2472 | -31 | 0    | - .MMPSASDAAAAAALQLQESGWEE LR.R           |
| 2 - 26      | 2574.2489 | 2573.2416 | 2573.2067 | 14  | 0    | M.MPSASDAAAAAALQLQESGWEE LR.R             |
| 40 - 49     | 1107.6084 | 1106.6011 | 1106.6196 | -17 | 1    | K.LSSYARLAAR.S                            |
| 50 - 65     | 1480.7894 | 1479.7821 | 1479.6437 | 94  | 0    | R.SSSAADAASASSPSE R.S                     |
| 66 - 81     | 1927.9153 | 1926.9080 | 1926.9397 | -16 | 1    | R.SSWKSMFEFIQSLLDK.L                      |
| 70 - 81     | 1439.7769 | 1438.7696 | 1438.7014 | 47  | 0    | K.SMEFEIQSLLDK.L                          |
| 70 - 91     | 2585.3710 | 2584.3637 | 2584.2149 | 58  | 1    | K.SMEFEIQSLLDKQLQDVNDAMSR.C Oxidation (M) |
| 106 - 110   | 652.4408  | 651.4336  | 651.3929  | 62  | 1    | K.LARHR.D                                 |
| 123 - 131   | 1003.5660 | 1002.5587 | 1002.5570 | 2   | 1    | R.TRGNLSSIR.E                             |
| 132 - 148   | 1914.8844 | 1913.8771 | 1913.9330 | -29 | 1    | R.EHADLLSSVRDDITESK.A                     |
| 157 - 161   | 637.3811  | 636.3738  | 636.4071  | -52 | 0    | R.VHLLR.E                                 |
| 203 - 212   | 1186.6419 | 1185.6346 | 1185.6870 | -44 | 1    | K.QLGEKFPVIR.G                            |

Spot No.: **128**

Mascot score: **95**

Sequence coverage %: **34**

NCBI accession No.: **gi| 312281543**

Matched peptides No.: **14**

Total peptides No.: **49**

Calculated Mr: **50983**

Calculated pI: **6.67**

### Annotated PMF spectra:

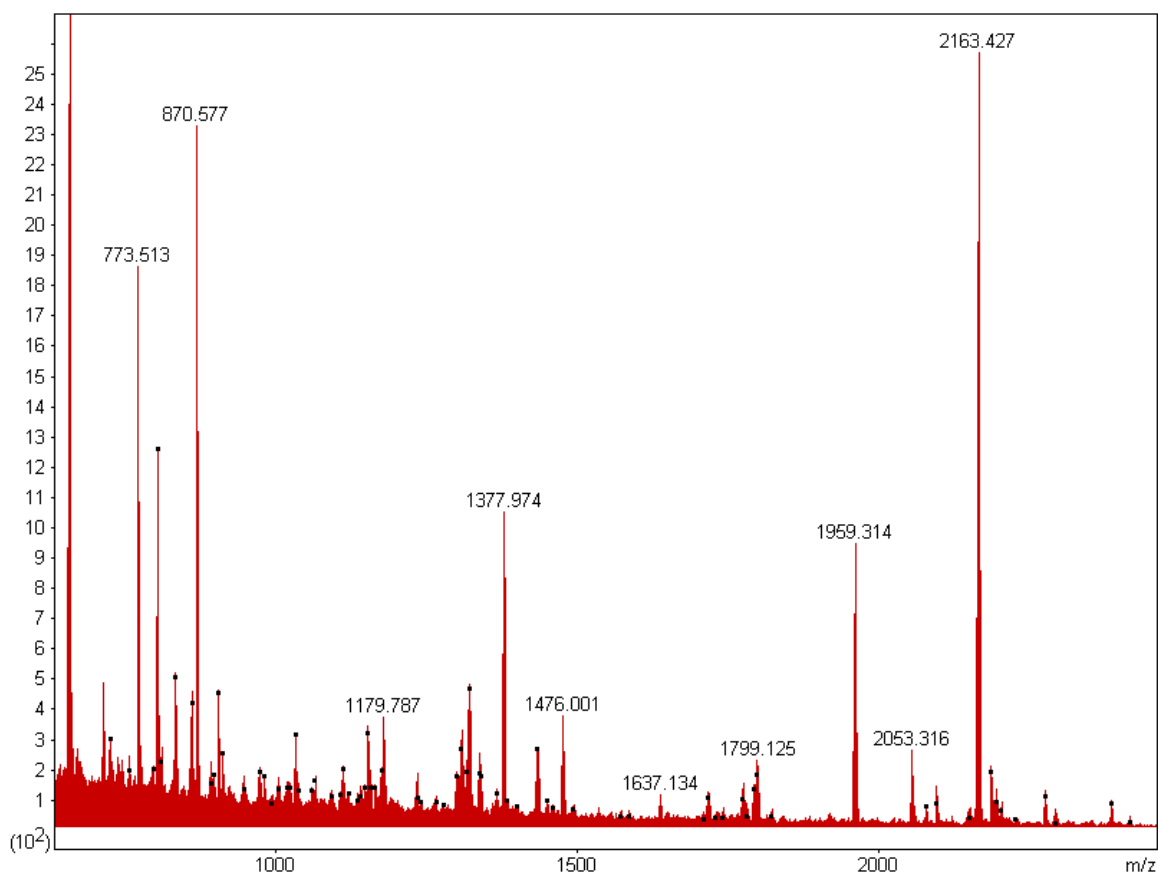

### Probability Based Mowse Score:

Protein score is  $-10 \cdot \log(P)$ , where P is the probability that the observed match is a random event. Protein scores greater than 72 are significant ( $p < 0.05$ ).

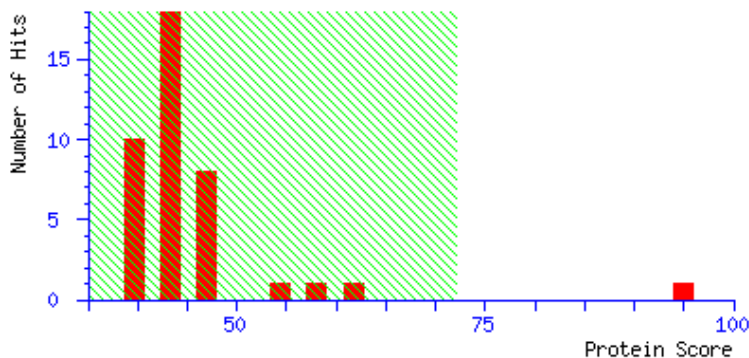



Matched peptide sequences: shown in **Bold Red**

```

1 MSSTHQLTSS LISSSSSTFL APSNFNRRAR NGCLPMAKRV NTCKCVATPQ
51 EKIEYKTNVS RNSNMSKLQA GYLFPEIARR RSAHLLKYPD AQIISLGIGD
101 TTEPIPEVIT SAIAEKAHEL STIEGYSYGYG PEQGAKPLRA AIAKTFYSGL
151 GIGDDDIFVS DGAKCDISRL QVMFGSKVTI AVQDPSYPAY VDSSVIMGQT
201 GQFNTDVQKY GNIEYMKCTP ENGFFPDLST VGRTDIIFFC SPNNPTGAAA
251 TREQLKQLVE FAKNGSIIV YDSAYAMYMS DDNPRSIFEI PGAEEVAMET
301 ASFSKYAGFT GVRLGWTVIP KQLLYSDGFP VAKDFNRIIC TCFNGASNLS
351 QAGALACLTP EGLEAMHKVI GFYKENTNII IDTFTSLGYD VYGGKNAPYV
401 WVHFPNQSSW DVFAEILEKT HVVTPGSGF GPGGEGFVRV SAFGHRENIL
451 EACRRFKQLY K

```

Matched peptides information:

| Start - End | Observed  | Mr (expt) | Mr (calc) | ppm | Miss | Sequence                  |               |
|-------------|-----------|-----------|-----------|-----|------|---------------------------|---------------|
| 31 - 38     | 906.6143  | 905.6070  | 905.4099  | 218 | 0    | R.NGCLPMAK.R              | Oxidation (M) |
| 68 - 79     | 1377.9744 | 1376.9671 | 1376.7452 | 161 | 0    | K.LQAGYLFPEIAR.R          |               |
| 117 - 136   | 2094.3036 | 2093.2963 | 2092.9701 | 156 | 0    | K.AHELSTIEGYSYGYGPEQGAK.P |               |
| 210 - 217   | 1033.6347 | 1032.6274 | 1032.4586 | 164 | 0    | K.YGNIEYMK.C              | Oxidation (M) |
| 218 - 233   | 1797.1237 | 1796.1164 | 1795.8200 | 165 | 0    | K.CTPENGFFPDLSTVGR.T      |               |
| 234 - 252   | 2053.3161 | 2052.3088 | 2051.9735 | 163 | 0    | R.TDIIFFCSPNNPTGAAATR.E   |               |
| 257 - 263   | 834.5486  | 833.5413  | 833.4647  | 92  | 0    | K.QLVEFAK.K               |               |
| 306 - 313   | 870.5775  | 869.5702  | 869.4396  | 150 | 0    | K.YAGFTGVR.L              |               |
| 314 - 321   | 913.6077  | 912.6004  | 912.5433  | 63  | 0    | R.LGWTVIP.Q               |               |
| 322 - 333   | 1337.8834 | 1336.8761 | 1336.7027 | 130 | 0    | K.QLLYSDGFPVAK.D          |               |
| 369 - 374   | 726.4701  | 725.4628  | 725.4112  | 71  | 0    | K.VIGFYK.E                |               |
| 420 - 439   | 1959.3139 | 1958.3066 | 1957.9647 | 175 | 0    | K.THVVTPGSGFGPGGEGFVR.V   |               |
| 440 - 446   | 773.5129  | 772.5057  | 772.3980  | 139 | 0    | R.VSAFGHR.E               |               |
| 447 - 454   | 1004.6406 | 1003.6333 | 1003.4756 | 157 | 0    | R.ENILEACR.R              |               |

Spot No.: **129**

Mascot score: **156**    Sequence coverage %: **40**

NCBI accession No.: **gi| 15239282**

Matched peptides No.: **18**

Total peptides No.: **43**

Calculated Mr: **40643**

Calculated pI: **8.32**

### Annotated PMF spectra:

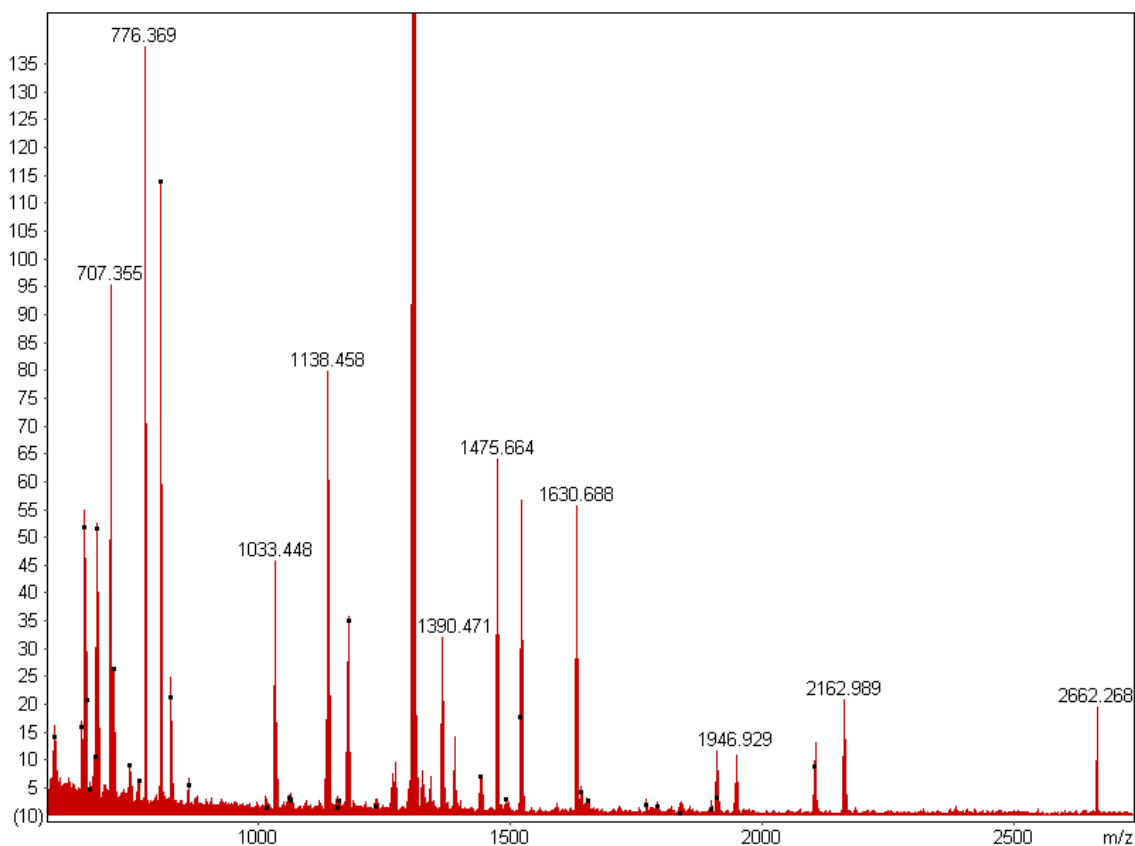

### Probability Based Mowse Score:

Protein score is  $-10 \cdot \log(P)$ , where P is the probability that the observed match is a random event. Protein scores greater than 72 are significant ( $p < 0.05$ ).

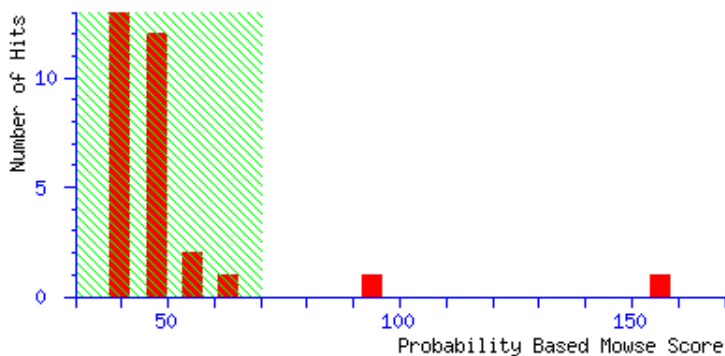

Matched peptide sequences: shown in **Bold Red**

**1** MAAAISSAAVS LPSSKSSSLL TKISSVSPQR IFLKKSTVCY RRVVSVKAQV  
**51** TDDTTEAPPV KVVKESKK**QE** **EGIVVNKFKP** **KNPYTGR**CLL NTKITGDDAP  
**101** GETWHIVFTT EGEVPYR**EGQ** **SIGVIPEGID** KNGKPHKLRL **YSIASSAIGD**  
**151** **FGDSK**TVSLC VKRLVYTNDG GEIVK**GVCSN** **FLCDLKP**GDE **AKITGP**VGKE  
**201** MLMPKDPNAT IIMLGTGTGI APFR**SFLWKM** **FFEEHEDYKF** NGLAWLFLGV  
**251** PTSSSLLYKE EFEKMK**KEKNP** DNFR**LDFAVS** REQTNEK**GEK** **MYIQTRMAEY**  
**301** **AEELWELLK** **DNTFVYMCGL** **KGMEKGIDDI** **MVSLAAKGI** **DWLEYK**QLK  
**351** **RSEQWNVEVY**

Matched peptides information:

| Start - End | Observed  | Mr(expt)  | Mr(calc)  | ppm | Miss | Sequence                        |
|-------------|-----------|-----------|-----------|-----|------|---------------------------------|
| 69 - 77     | 1015.4746 | 1014.4673 | 1014.5346 | -66 | 0    | K.QEEGIVVNK.F                   |
| 82 - 87     | 707.3550  | 706.3477  | 706.3398  | 11  | 0    | K.NPYTGR.C                      |
| 118 - 131   | 1441.6547 | 1440.6474 | 1440.7460 | -68 | 0    | R.EGQSIGVIPEGIDK.N              |
| 140 - 155   | 1630.6885 | 1629.6812 | 1629.7886 | -66 | 0    | R.LYSIASSAIGDFGDSK.T            |
| 176 - 192   | 1909.7993 | 1908.7920 | 1908.8710 | -41 | 0    | K.GVCSNFLCDLKPGEAK.I            |
| 225 - 229   | 680.3747  | 679.3674  | 679.3693  | -3  | 0    | R.SFLWK.M                       |
| 230 - 239   | 1374.4809 | 1373.4736 | 1373.5598 | -63 | 0    | K.MFFEEHEDYK.F                  |
| 230 - 239   | 1390.4706 | 1389.4633 | 1389.5547 | -66 | 0    | K.MFFEEHEDYK.F Oxidation (M)    |
| 275 - 281   | 807.4221  | 806.4148  | 806.4286  | -17 | 0    | R.LDFAVSR.E                     |
| 291 - 296   | 827.3824  | 826.3751  | 826.4007  | -31 | 0    | K.MYIQTR.M Oxidation (M)        |
| 297 - 309   | 1640.6884 | 1639.6811 | 1639.7803 | -60 | 0    | R.MAEYAEELWELLK.K Oxidation (M) |
| 297 - 310   | 1768.7718 | 1767.7645 | 1767.8753 | -63 | 1    | R.MAEYAEELWELLK.D Oxidation (M) |
| 310 - 321   | 1475.6642 | 1474.6569 | 1474.6949 | -26 | 1    | K.KDNTFVYMCGLK.G                |
| 310 - 321   | 1491.6536 | 1490.6463 | 1490.6898 | -29 | 1    | K.KDNTFVYMCGLK.G Oxidation (M)  |
| 326 - 337   | 1232.5462 | 1231.5389 | 1231.6482 | -89 | 0    | K.GIDDIWVSLAAK.D                |
| 338 - 346   | 1138.4575 | 1137.4502 | 1137.5342 | -74 | 0    | K.DGIDWLEYK.K                   |
| 338 - 347   | 1266.5367 | 1265.5294 | 1265.6292 | -79 | 1    | K.DGIDWLEYK.Q                   |
| 351 - 360   | 1309.5316 | 1308.5243 | 1308.6098 | -65 | 1    | K.RSEQWNVEVY.-                  |

Spot No.: **130**

Mascot score: **94**    Sequence coverage %: **21**

NCBI accession No.: **gi| 11228579**

Matched peptides No.: **8**

Total peptides No.: **20**

Calculated Mr: **36905**

Calculated pI: **5.39**

### Annotated PMF spectra:

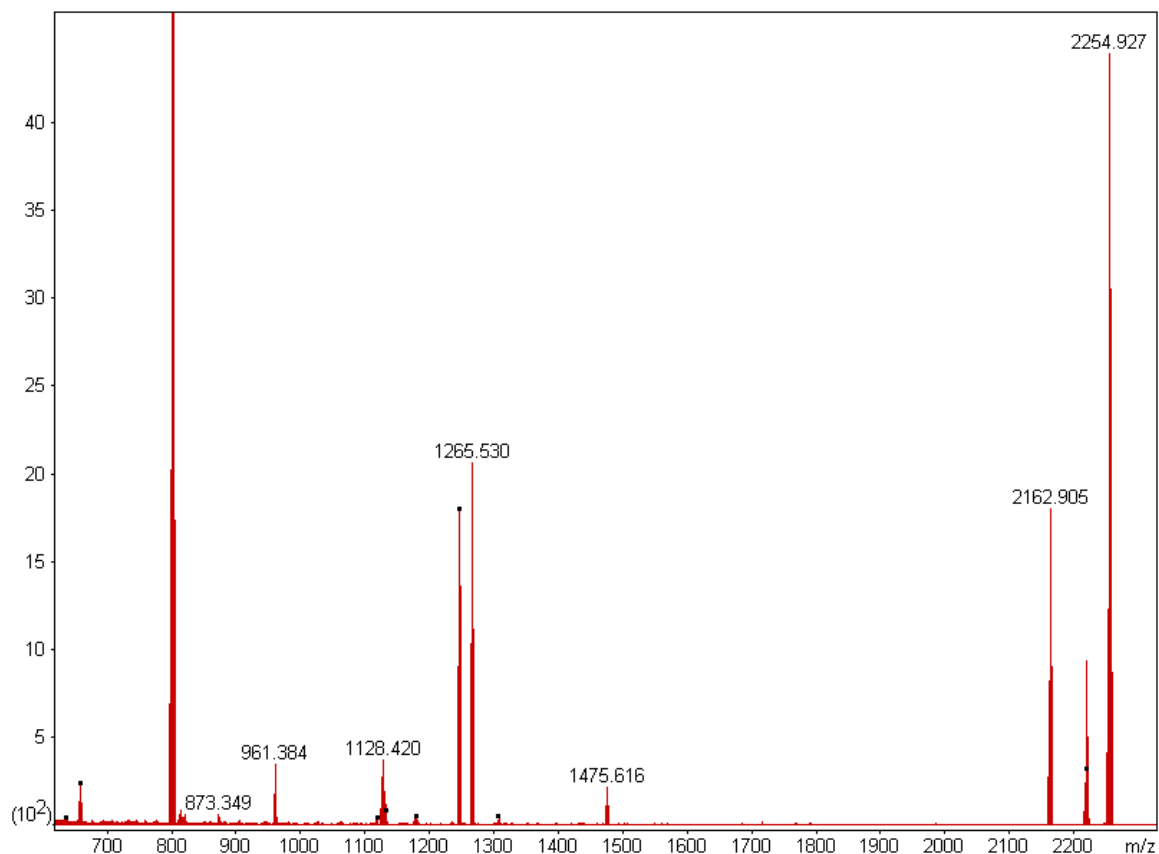

### Probability Based Mowse Score:

Protein score is  $-10 \cdot \log(P)$ , where P is the probability that the observed match is a random event. Protein scores greater than 72 are significant ( $p < 0.05$ ).

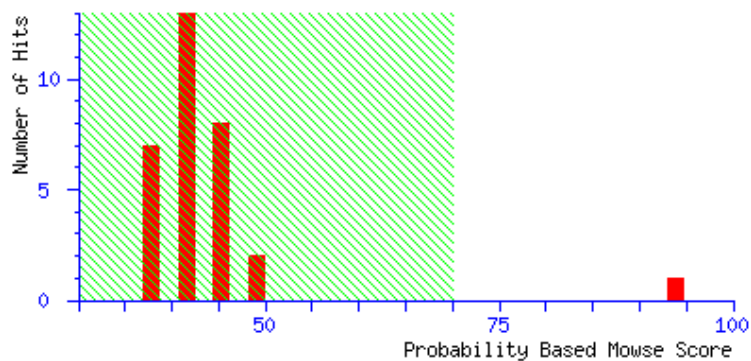

Matched peptide sequences: shown in **Bold Red**

**1** ESAPSLAVVG VTGAVGQEFLL SVLSDRDFPY SSIKMLASKR SAGKRVAFDG  
**51** HEYTVEELTA DSFNGVDIAL FSAGGSISKE **FGPLAAEKGT IVVDNSSAFR**  
**101** MVDGVPLVIP EVNPEAMKGI KVGMGKGLI ANPNCSTIIC LMAVTPLHHH  
**151** AKVKRMVVST YQAASGAGAA AMEELVQQTR EVLEGKPPTC NIFGQQYAFN  
**201** LFSHNAPILD NGYNEEEMKL VKETR**KIWND TEVKVTATCI RVPVMR**AHAE  
**251** SVNLQFENPL DENTAREILK **KAPGVYIIDD RASNTFPTPL** DVSNKDDVAV  
**301** GRIR**R**D**V**S**Q**D **GNFGLDIFVC GDQIR**KGAAL NAVQIAEMLL

Matched peptides information:

| Start - End | Observed  | Mr(expt)  | Mr(calc)  | ppm  | Miss | Sequence                 |
|-------------|-----------|-----------|-----------|------|------|--------------------------|
| 80 - 88     | 961.3838  | 960.3766  | 960.4916  | -120 | 0    | K.EFGPLAAEK.G            |
| 89 - 100    | 1265.5303 | 1264.5230 | 1264.6412 | -93  | 0    | K.GTIVVDNSSAFR.M         |
| 226 - 234   | 1132.4595 | 1131.4522 | 1131.5924 | -124 | 1    | R.KIWNDTEVK.V            |
| 235 - 241   | 820.3312  | 819.3239  | 819.4273  | -126 | 0    | K.VTATCIR.V              |
| 242 - 246   | 617.2216  | 616.2144  | 616.3367  | -198 | 0    | R.VPVMR.A Oxidation (M)  |
| 271 - 281   | 1246.5550 | 1245.5477 | 1245.6717 | -100 | 1    | K.KAPGVYIIDDR.A          |
| 272 - 281   | 1118.4414 | 1117.4341 | 1117.5768 | -128 | 0    | K.APGVYIIDDR.A           |
| 306 - 325   | 2254.9270 | 2253.9197 | 2254.0325 | -50  | 0    | R.DVSQDGNFGLDIFVCGDQIR.K |

Spot No.: **131**

Mascot score: **96**    Sequence coverage %: **8**

NCBI accession No.: **gi| 116060520**

Matched peptides No.: **11**

Total peptides No.: **17**

Calculated Mr: **106933**

Calculated pI: **6.77**

### Annotated PMF spectra:

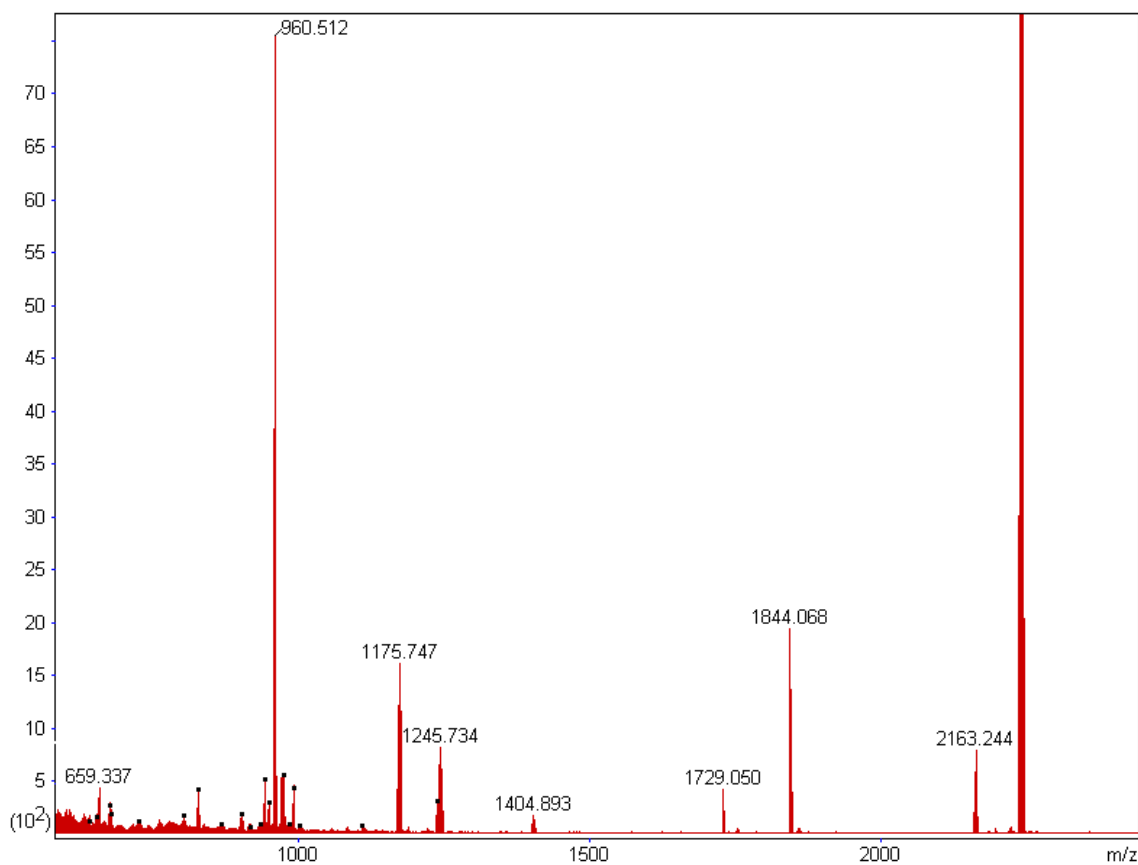

### Probability Based Mowse Score:

Protein score is  $-10 \cdot \log(P)$ , where P is the probability that the observed match is a random event. Protein scores greater than 72 are significant ( $p < 0.05$ ).

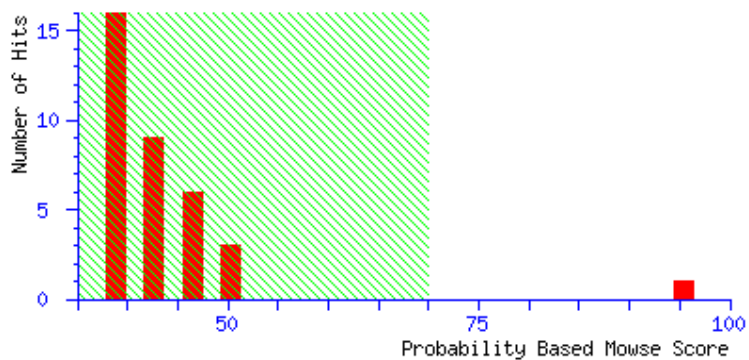

Matched peptide sequences: shown in **Bold Red**

**1 MEPEKR**ARSS LGVARASRPT IELGKRIDAN VEPPLTRAE **ARDGER**FPTE  
**51** KLTRALIREG WSENKRRALV MKSTGDDGTM VNPMLRETL LRLANSETLR  
**101** EIRRRVNETA KEKRRTP EIG ARDRSEYGRG MTEADCKPWS APELVHASAD  
**151** DVEAFFKDLA SEVELSELEQ FVPHGVRKRK LIENLHAYRV SSHRGVMMVK  
**201** IVYLAQYKRD VDACRNAWTE DILGHALDSL RDALLTPKSA EDQETELKCV  
**251** FGLLNHSIQE DLVDTAKIFD EVLRFVHERS LAASKSCSGT AALVLARSMA  
**301** ATLTALVPHA SQSHEDSIKL AQKVAVCLEG AVSNGSARAD GHLVTRLSEV  
**351** IASLGSVNAD AFISAPREQG LDVVQKLRTK SKRRQMPLSH RLCQVIDDVE  
**401** KRVQSLTHAA SPAVIAIKVH NLVK**LLNEVL** **DKSGDEAMMS** ELSQKFINAQ  
**451** EDGEVARKAM VNVACSWAVD ASDDAVNER**Q** **RVTRVFLNEL** TQSPRPLILH  
**501** WIKENSANLR **QEDDKIGR**IS GLLIQLLOGD VIRMQQLLDF IIAEGILEER  
**551** ISHDLSMAFH RYLSDIVKDD NAKREILDDS TAQTARQLIG SESEKENTKV  
**601** VVIPATNVLD FSSDEERLLC TSFAEVSAN LASKVAELKG ALNASAIHK  
**651** TLGRVLTVCL MHDATKGLF AEIVGDMGPE VTKDVLSTVS MDVLSVENLE  
**701** NTNSIFNCAH **WRMCAAFDR**W KFARSLVDFQ LCLLHNVPKG KRAVAEGLVE  
**751** ANTTQLVQLA KSTNIAHKCL HIWTRILVVI PLIGVVLMSA SASNKFSQLI  
**801** LDVLDLSIIGK TVVEESAEDI IAESDMGETL VDRLVALFSV VSVGQIPKWA  
**851** PVPK**LPFRE** **LSSVKL**ALSK SIESK**SIAGM** **VCVRLQRAIS** **LPLTKLR**TRS  
**901** VNPWK**ILASG** **ASSDR**SKLSD AEKAEFWLQG TVRRPGNLA WQNCNAEPTF  
**951** ITENKILS

Matched peptides information:

| Start - End | Observed  | Mr(expt)  | Mr(calc)  | ppm | Miss | Sequence                           |
|-------------|-----------|-----------|-----------|-----|------|------------------------------------|
| 1 - 6       | 805.4094  | 804.4021  | 804.3800  | 28  | 1    | - . <b>MEPEKR</b> .A Oxidation (M) |
| 39 - 46     | 903.4320  | 902.4247  | 902.4206  | 5   | 1    | R. <b>AEARDGER</b> .F              |
| 425 - 432   | 943.4750  | 942.4677  | 942.5386  | -75 | 0    | K. <b>LLNEVL</b> DK.S              |
| 480 - 484   | 659.3374  | 658.3301  | 658.3875  | -87 | 1    | R. <b>QVTR</b> .V                  |
| 511 - 518   | 960.5118  | 959.5045  | 959.4672  | 39  | 1    | R. <b>QEDDKIGR</b> .I              |
| 713 - 719   | 870.4022  | 869.3949  | 869.3524  | 49  | 0    | R. <b>MCAAFDR</b> .W               |
| 856 - 865   | 1175.7474 | 1174.7401 | 1174.6710 | 59  | 1    | K. <b>LPFRELSSVK</b> .L            |
| 876 - 884   | 992.5152  | 991.5080  | 991.4943  | 14  | 0    | K. <b>SIAGMVCVR</b> .L             |
| 885 - 895   | 1239.7298 | 1238.7225 | 1238.7710 | -39 | 1    | R. <b>LQRAISLPLTK</b> .L           |
| 888 - 897   | 1111.6574 | 1110.6501 | 1110.7124 | -56 | 1    | R. <b>AISLPLTKLR</b> .T            |
| 906 - 915   | 976.5137  | 975.5065  | 975.4985  | 8   | 0    | K. <b>ILASGASSDR</b> .S            |

Spot No.: **132**

Mascot score: **133**    Sequence coverage %: **32**

NCBI accession No.: **gi| 2317731**

Matched peptides No.: **13**

Total peptides No.: **39**

Calculated Mr: **41875**

Calculated pI: **5.93**

### Annotated PMF spectra:

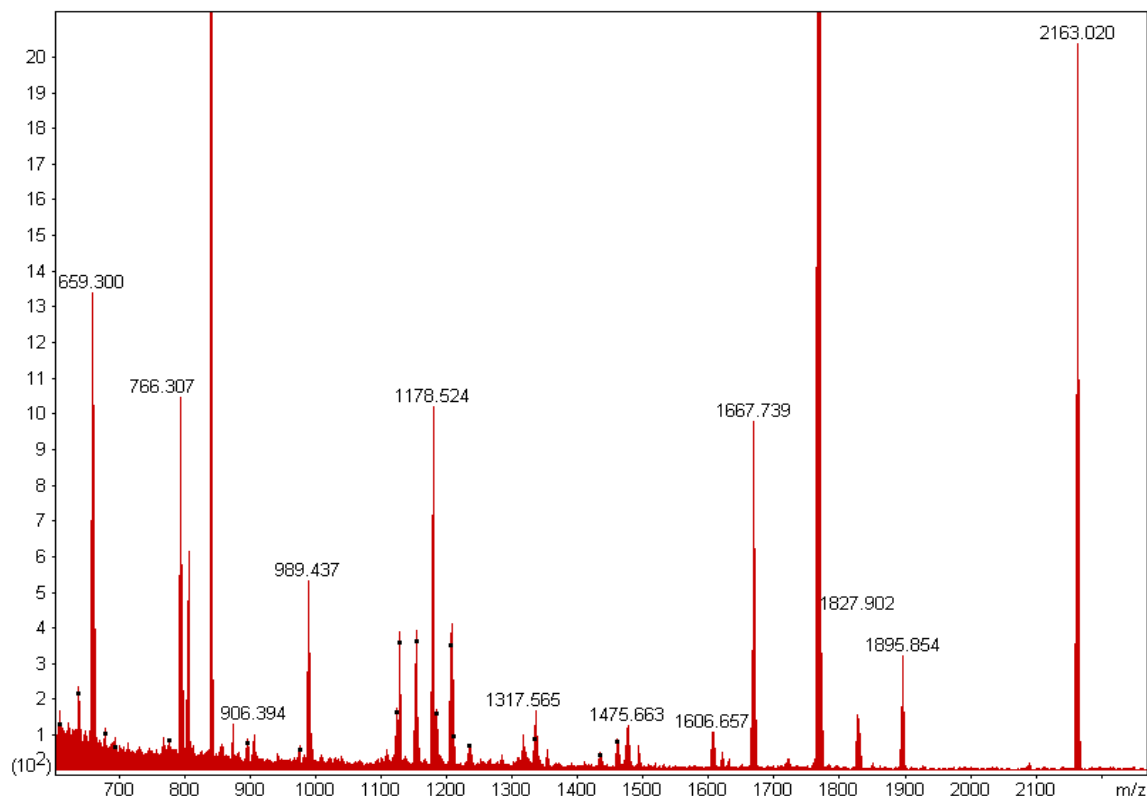

### Probability Based Mowse Score:

Protein score is  $-10 \cdot \log(P)$ , where P is the probability that the observed match is a random event. Protein scores greater than 72 are significant ( $p < 0.05$ ).

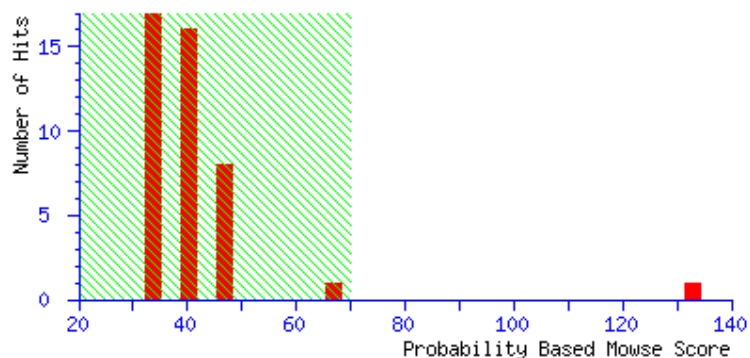



Matched peptide sequences: shown in **Bold Red**

**1** MVEPANTVGL PVNPTPLLKD ELDIVIPTIR NLDFLEMWRP FLQPYHLIIV  
**51** QDGDPSK**KIH VPEGYDYELY** NRNDINRILG PK**ASCISFKD** **SACRC**FGYMV  
**101** SKKKY**IFTID DDCFVAKDPS** GK**AVNALEQH** **IKNLL**CPSSP FFFNTLYDPY  
**151** **REGADFVRGY PFSL**REGVST AVSHGLWLNI PDYDAPTQLV KPKERNTRY**V**  
**201** **DAVMTNPKGT** LFPMCGMNLA FDRDLIGPAM YFVLMGDGQP IGRY**DDMWAG**  
**251** **WCIK**VICDHL SLGVKT**TGLPY IYH**SKASNPF VNLKKEYKGI FWQEEIIPFF  
**301** QNAKLS**KEAV TVQQCYIELS** KMVKE**LSSL** **DPYFDK**LADA MVTWIEAWDE  
**351** LNPPAASGKS LRAV

Matched peptides information:

| Start - End | Observed  | Mr(expt)  | Mr(calc)  | ppm | Miss | Sequence                               |
|-------------|-----------|-----------|-----------|-----|------|----------------------------------------|
| 58 - 72     | 1895.8537 | 1894.8464 | 1894.9213 | -40 | 1    | K.KIH <b>VPEGYDYELY</b> NR.N           |
| 59 - 72     | 1767.7695 | 1766.7622 | 1766.8264 | -36 | 0    | K.IH <b>VPEGYDYELY</b> NR.N            |
| 83 - 89     | 812.3390  | 811.3317  | 811.3898  | -72 | 0    | K.A <b>SCISFK</b> .D                   |
| 90 - 94     | 608.1921  | 607.1848  | 607.2384  | -88 | 0    | K.D <b>SACR</b> .C                     |
| 105 - 117   | 1606.6572 | 1605.6499 | 1605.7385 | -55 | 0    | K.Y <b>IFTIDDDCFVAK</b> .D             |
| 123 - 132   | 1122.5363 | 1121.5290 | 1121.6193 | -80 | 0    | K.A <b>VNALEQH</b> IK.N                |
| 152 - 158   | 793.3104  | 792.3031  | 792.3766  | -93 | 0    | R.E <b>GADFVR</b> .G                   |
| 159 - 165   | 839.3653  | 838.3580  | 838.4337  | -90 | 0    | R.G <b>YPFSLR</b> .E                   |
| 199 - 208   | 1153.5164 | 1152.5091 | 1152.5485 | -34 | 0    | R.Y <b>VDAVMTNPK</b> .G Oxidation (M)  |
| 244 - 254   | 1460.5353 | 1459.5280 | 1459.5901 | -43 | 0    | R.Y <b>DDMWAGWCIK</b> .V Oxidation (M) |
| 266 - 275   | 1178.5237 | 1177.5164 | 1177.6131 | -82 | 0    | K.T <b>GLPYIYH</b> SK.A                |
| 308 - 321   | 1667.7394 | 1666.7321 | 1666.8236 | -55 | 0    | K.E <b>AVTVQQCYIELS</b> K.M            |
| 327 - 336   | 1184.5086 | 1183.5013 | 1183.5761 | -63 | 0    | K.L <b>SSLDPYFDK</b> .L                |

Spot No.: **133**

Mascot score: **174** Sequence coverage %: **26**

NCBI accession No.: **gi| 18391442**

Matched peptides No.: **15**

Total peptides No.: **27**

Calculated Mr: **42878**

Calculated pI: **5.40**

### Annotated PMF spectra:

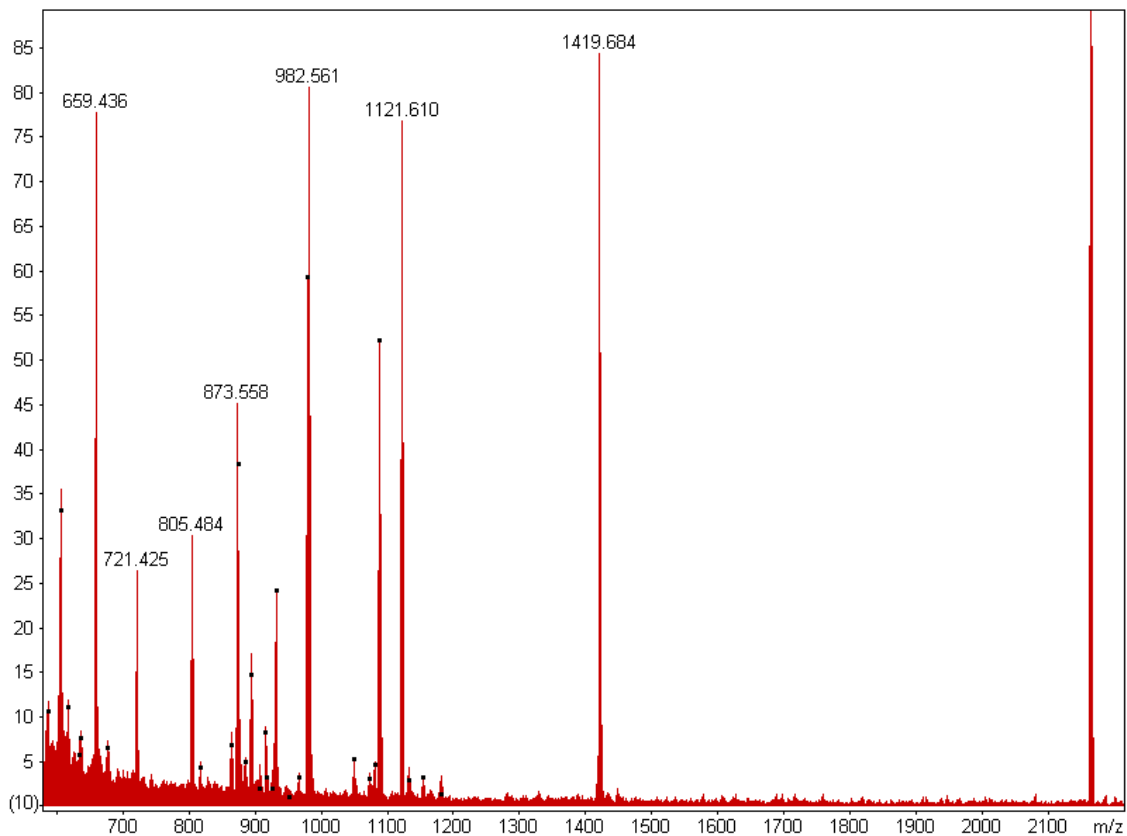

### Probability Based Mowse Score:

Protein score is  $-10 \cdot \log(P)$ , where P is the probability that the observed match is a random event. Protein scores greater than 72 are significant ( $p < 0.05$ ).

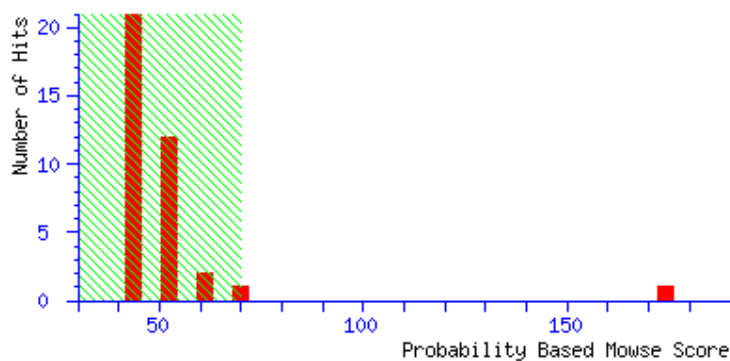

Matched peptide sequences: shown in **Bold Red**

**1** MTSRYWVWSL PVKDSASSLW NRLQEQISKH **SFDTVPVYRFN** **IPNLRVGTLD**  
**51** SLLALGDDLL **KSNSFVEGVS** **QKIRRQIEEL** ERISGVESNA LTVDGVVPVDS  
**101** YLTR**FWWDEA** **KYPTMSPLKE** VVDNIQSQVA KIEDDLKVRV **AEYNNIRGQL**  
**151** **HAINRKQSGS** **LAVRDLSNLV** KPEDIVESEH LVTLLAVVPK YSQKDWLACY  
**201** ETLTDYVWPR SSKKLFEDNE YALYTVTLFT **RVADNFR**IAA **REKGFQVR**DF  
**251** EQSVEAQETR KQELAK**LVQD** **QESLR**SLLQ WCYTSYGEVF SSWMHFC AVR  
**301** TFAESIMRYG LPPAFLACVL SPAVKSEKKV **RSILER**LCDS TNSLYWKSEE  
**351** DAGAMAGLAG DSETHPYVSF TINLA

Matched peptides information:

| Start - End | Observed  | Mr(expt)  | Mr(calc)  | ppm | Miss | Sequence        |               |
|-------------|-----------|-----------|-----------|-----|------|-----------------|---------------|
| 30 - 38     | 1121.6103 | 1120.6030 | 1120.5302 | 65  | 0    | K.HSFDTVPVYR.F  |               |
| 39 - 45     | 873.5577  | 872.5505  | 872.4868  | 73  | 0    | R.FNIPNLR.V     |               |
| 62 - 72     | 1181.6174 | 1180.6101 | 1180.5724 | 32  | 0    | K.SNSFVEGVSQK.I |               |
| 75 - 82     | 1072.6099 | 1071.6026 | 1071.5672 | 33  | 1    | R.RQIEELER.I    |               |
| 76 - 82     | 916.5278  | 915.5205  | 915.4661  | 59  | 0    | R.QIEELER.I     |               |
| 105 - 111   | 894.4897  | 893.4824  | 893.4283  | 61  | 0    | R.FWWDEAK.Y     |               |
| 112 - 119   | 952.5311  | 951.5238  | 951.4735  | 53  | 0    | K.YPTMSPLK.E    | Oxidation (M) |
| 140 - 147   | 978.5567  | 977.5494  | 977.4930  | 58  | 0    | R.VAEYNNIR.G    |               |
| 148 - 155   | 885.5243  | 884.5170  | 884.4828  | 39  | 0    | R.GQLMAINR.K    |               |
| 157 - 164   | 817.4690  | 816.4617  | 816.4454  | 20  | 0    | K.QSGSLAVR.D    |               |
| 232 - 237   | 721.4246  | 720.4173  | 720.3555  | 86  | 0    | R.VADNFR.I      |               |
| 242 - 248   | 863.5164  | 862.5092  | 862.4661  | 50  | 1    | R.EKGFQVR.D     |               |
| 244 - 248   | 606.3957  | 605.3884  | 605.3286  | 99  | 0    | K.GFQVR.D       |               |
| 267 - 275   | 1087.6380 | 1086.6307 | 1086.5669 | 59  | 0    | K.LVQDQESLR.S   |               |
| 332 - 336   | 617.3872  | 616.3800  | 616.3544  | 41  | 0    | R.SILER.L       |               |

Spot No.: **134**

Mascot score: **97**

Sequence coverage %: **31**

NCBI accession No.: **gi| 312281543**

Matched peptides No.: **11**

Total peptides No.: **32**

Calculated Mr: **48352**

Calculated pI: **6.81**

### Annotated PMF spectra:

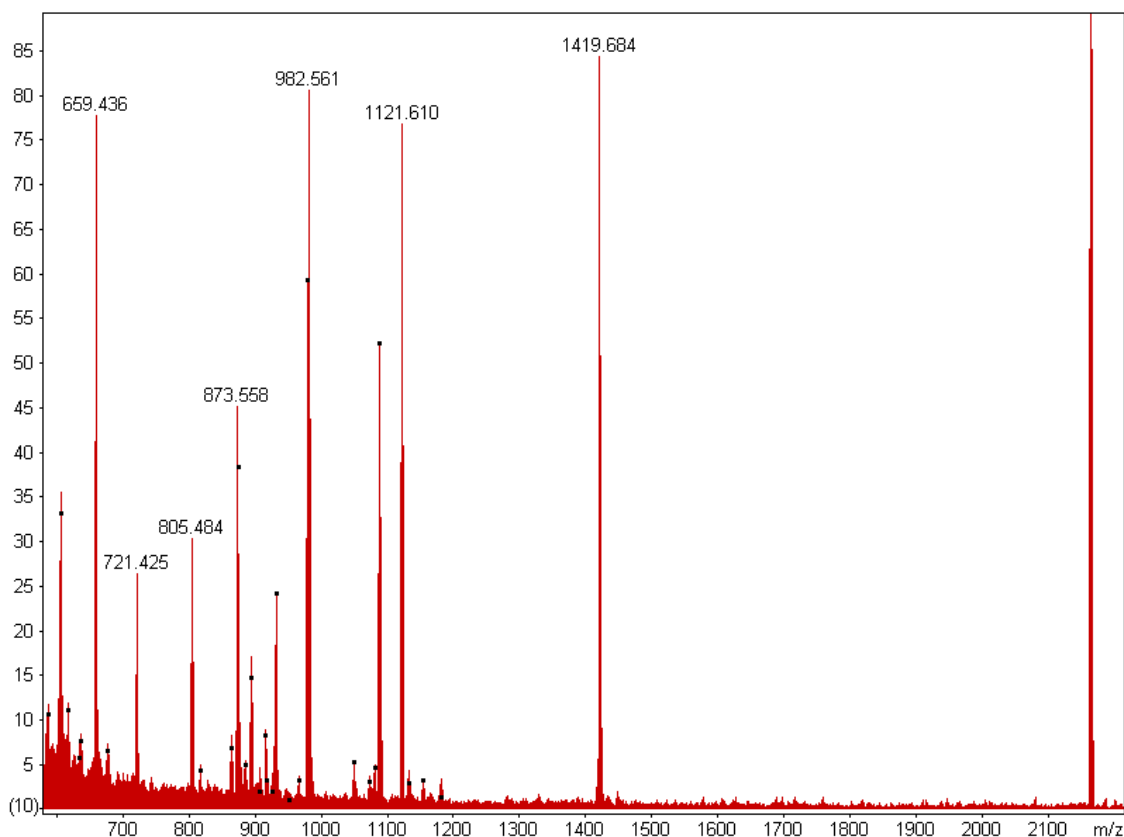

### Probability Based Mowse Score:

Protein score is  $-10 \cdot \log(P)$ , where P is the probability that the observed match is a random event. Protein scores greater than 72 are significant ( $p < 0.05$ ).

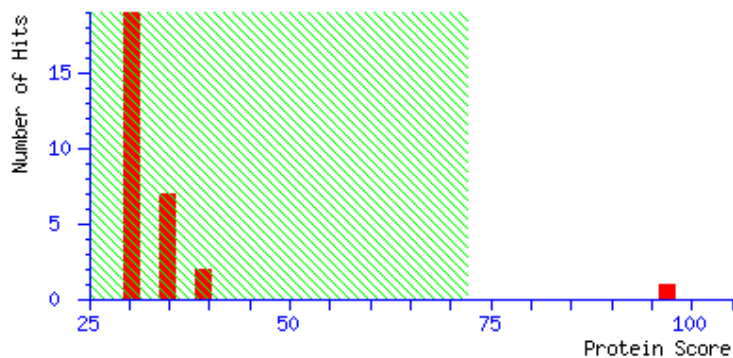

Matched peptide sequences: shown in **Bold Red**

1 MSSTHQLTSS LISSSSSTFL APSNFRNRAR NGCLPMAKRV NTCKCVATPQ  
 51 EKIEYKTNVS RNSNMSKLQA **GYLFPEIARR** RSAHLLKYPD AQIISLGIGD  
 101 TTEPIPEVIT SAIAEK**AHEL** **STIEGYSGYG** **PEQGAKPLRA** AIAK**TFYSGL**  
 151 **GIGDDDIFVS** **DGAKCDISRL** QVMFGSKVTI AVQDPSYPAY VDSSVIMGQT  
 201 GQFNIDVQKY GNIEYMK**CTP** **ENGFFPDLST** **VGRTDIIFFC** **SPNNPTGAAA**  
 251 **TREQLKQLVE** FAKKNGSIIV YDSAYAMYMS DDNPRSIFEI PGAEVAMET  
 301 ASFSKY**AGFT** **GVRLGWTVIP** **KQLLYSDGFP** **VAKDFNRIIC** TCFNGASNLS  
 351 QAGALACLTP EGLEAMHKVI GFYKENTNII IDTFTSLGYD VYGGKNAPYV  
 401 WVHFPNQSSW DVFAEILEKT **HVVTPGSGF** **GPGGEGFVRV** **SAFGHRENIL**  
 451 **EACRRFKQLY** K

Matched peptides information:

| Start - End | Observed  | Mr (expt) | Mr (calc) | ppm | Miss | Sequence                 |
|-------------|-----------|-----------|-----------|-----|------|--------------------------|
| 68 - 79     | 1377.8489 | 1376.8416 | 1376.7452 | 70  | 0    | K.LQAGYLFPEIAR.R         |
| 117 - 136   | 2094.1568 | 2093.1495 | 2092.9701 | 86  | 0    | K.AHELSTIEGYSGYGPEQGAK.P |
| 145 - 164   | 2077.0959 | 2076.0886 | 2075.9688 | 58  | 0    | K.TFYSGLGIGDDDIFVSDGAK.C |
| 218 - 233   | 1796.8889 | 1795.8816 | 1795.8200 | 34  | 0    | K.CTPENGFFPDLSTVGR.T     |
| 234 - 252   | 2053.1050 | 2052.0977 | 2051.9735 | 61  | 0    | R.TDIIFFCSPNNPTGAAATR.E  |
| 306 - 313   | 870.4710  | 869.4637  | 869.4396  | 28  | 0    | K.YAGFTGVR.L             |
| 322 - 333   | 1337.7687 | 1336.7614 | 1336.7027 | 44  | 0    | K.QLLYSDGFPVAK.D         |
| 420 - 439   | 1959.0586 | 1958.0513 | 1957.9647 | 44  | 0    | K.THVVTPGSGFGPGGEGFVR.V  |
| 440 - 446   | 773.4222  | 772.4149  | 772.3980  | 22  | 0    | R.VSAFGHR.E              |
| 447 - 454   | 1004.5606 | 1003.5533 | 1003.4756 | 77  | 0    | R.ENILEACR.R             |
| 447 - 455   | 1160.6340 | 1159.6267 | 1159.5768 | 43  | 1    | R.ENILEACRR.F            |

Spot No.: **135**

Mascot score: **104**    Sequence coverage %: **34**

NCBI accession No.: **gi| 4139264**

Matched peptides No.: **12**

Total peptides No.: **42**

Calculated Mr: **41888**

Calculated pI: **5.29**

### Annotated PMF spectra:

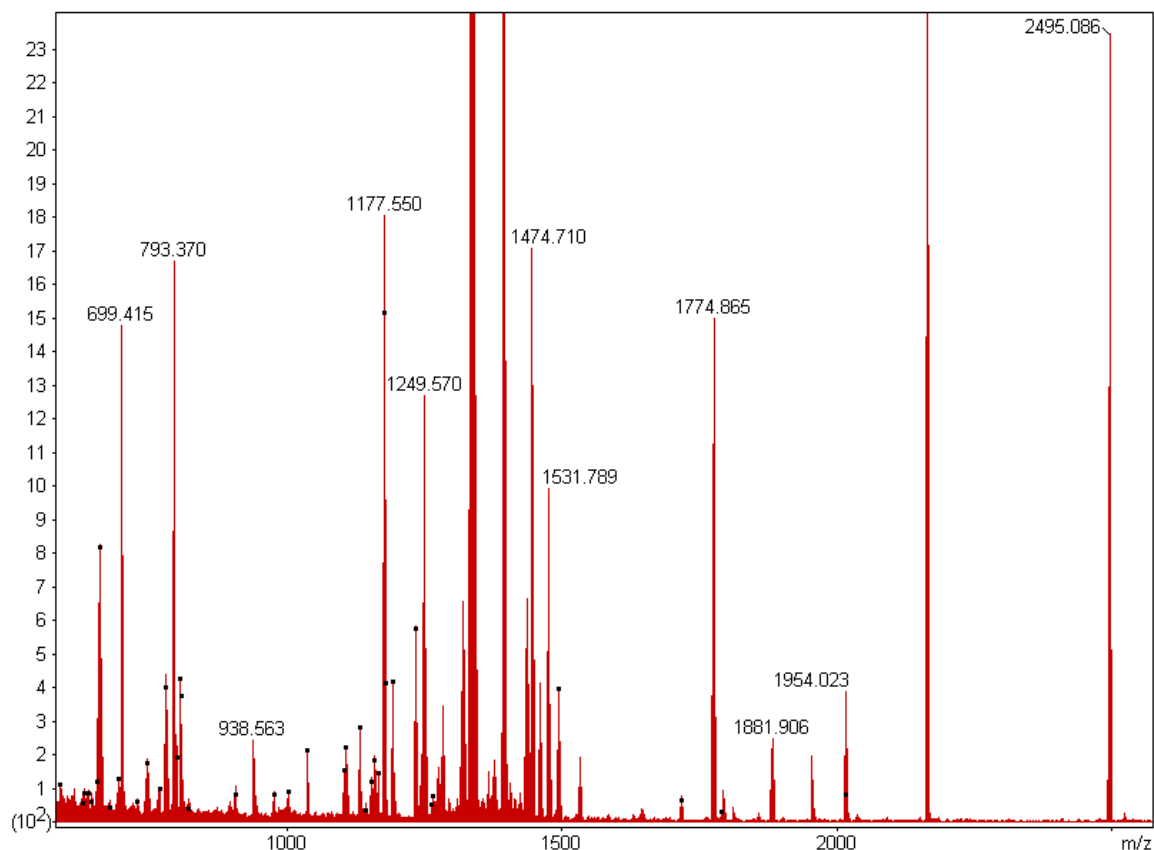

### Probability Based Mowse Score:

Protein score is  $-10 \cdot \log(P)$ , where  $P$  is the probability that the observed match is a random event. Protein scores greater than 72 are significant ( $p < 0.05$ ).

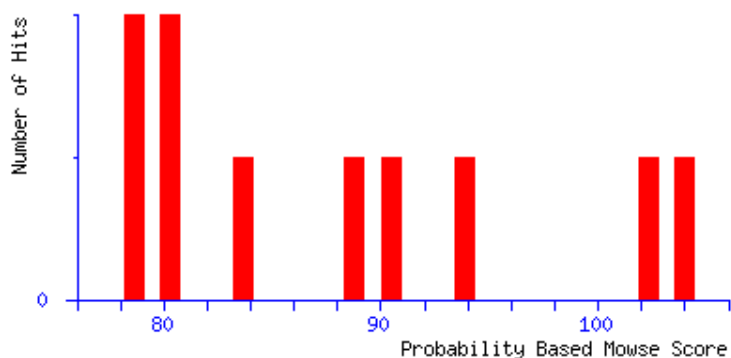

Matched peptide sequences: shown in **Bold Red**

**1** MADGEDIQPL VCDNGTGMVK **AGFAGDDAPR** AVFPSIVGRP **RHTGVMVGMG**  
**51** **QKDAYVGDEA** **QSKR**GILTLK YPIEHGIVSN WDDMENIWHH TFYNELRVAP  
**101** **EEHPVLLTEA** **PLNPK**ANREK MTHIMFETFN VPAMYVAIQV VLSLYASGRT  
**151** TGIVLDSGDG VSHTVPIYEG YALPHAILRL DLAGR**DLTDS** **LMKILTERGY**  
**201** **MFTTTAEREI** VRDIKEKLAY VALDYEQELE TAKSSSSVEK **NYELPDGQVI**  
**251** **TIGAER**FRCP EVLFQPSLVG MEAPGIHETT YNSIMK**CDVD** **IRKDLYGNIV**  
**301** LSGGSTMFPG IADR**MSKEIT** **ALAPSSMKIK** **VVAPPERKYS** VWIGGSILAS  
**351** LSTFQQMWIS **KGEYDESGPS** **IVHRKCF**

Matched peptides information:

| Start - End | Observed  | Mr(expt)  | Mr(calc)  | ppm  | Miss | Sequence                        |
|-------------|-----------|-----------|-----------|------|------|---------------------------------|
| 21 - 30     | 976.4043  | 975.3970  | 975.4410  | -45  | 0    | K.AGFAGDDAPR.A                  |
| 42 - 52     | 1176.5546 | 1175.5473 | 1175.5427 | 4    | 0    | R.HTGVMVGMGQK.D 2 Oxidation (M) |
| 53 - 64     | 1338.6523 | 1337.6450 | 1337.6211 | 18   | 1    | K.DAYVGDEAQSKR.G                |
| 98 - 115    | 1954.0234 | 1953.0161 | 1953.0571 | -21  | 0    | R.VAPEEHPVLLTEAPLNPK.A          |
| 186 - 193   | 938.5626  | 937.5554  | 937.4426  | 120  | 0    | R.DLTDSLTK.I Oxidation (M)      |
| 194 - 198   | 631.2904  | 630.2831  | 630.3701  | -138 | 0    | K.ILTER.G                       |
| 199 - 208   | 1192.4877 | 1191.4804 | 1191.5230 | -36  | 0    | R.GYMFTTAER.E Oxidation (M)     |
| 241 - 256   | 1774.8647 | 1773.8574 | 1773.8897 | -18  | 0    | K.NYELPDGQVITIGAER.F            |
| 287 - 293   | 905.4110  | 904.4037  | 904.4436  | -44  | 1    | K.CDVDIRK.D                     |
| 315 - 328   | 1493.7152 | 1492.7079 | 1492.7629 | -37  | 1    | R.MSKEITALAPSSMK.I              |
| 331 - 337   | 767.3690  | 766.3617  | 766.4337  | -94  | 0    | K.VVAPPER.K                     |
| 362 - 374   | 1445.6520 | 1444.6447 | 1444.6583 | -9   | 0    | K.GEYDESGPSIVHR.K               |

Spot No.: **136**

Mascot score: **95**    Sequence coverage %: **27**

NCBI accession No.: **gi| 145327759**

Matched peptides No.: **13**

Total peptides No.: **47**

Calculated Mr: **41079**

Calculated pI: **5.44**

### Annotated PMF spectra:

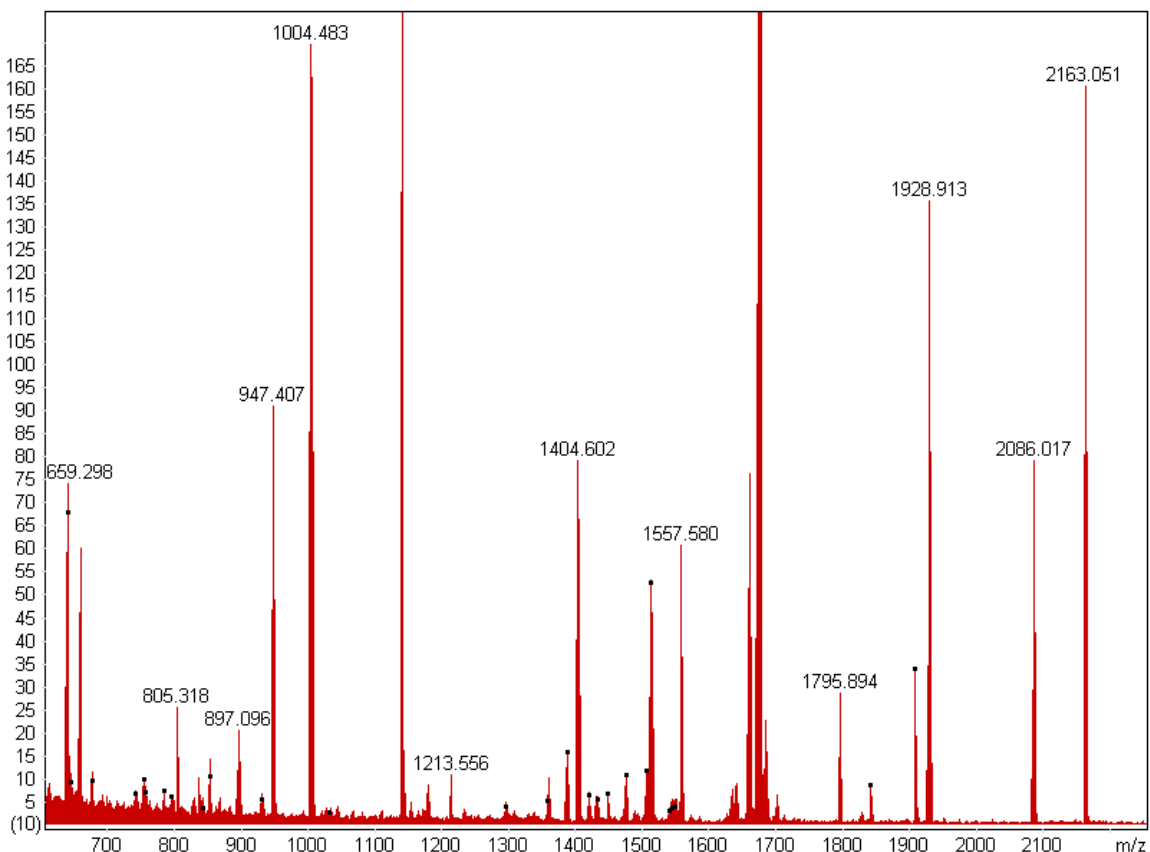

### Probability Based Mowse Score:

Protein score is  $-10 \cdot \log(P)$ , where P is the probability that the observed match is a random event. Protein scores greater than 72 are significant ( $p < 0.05$ ).

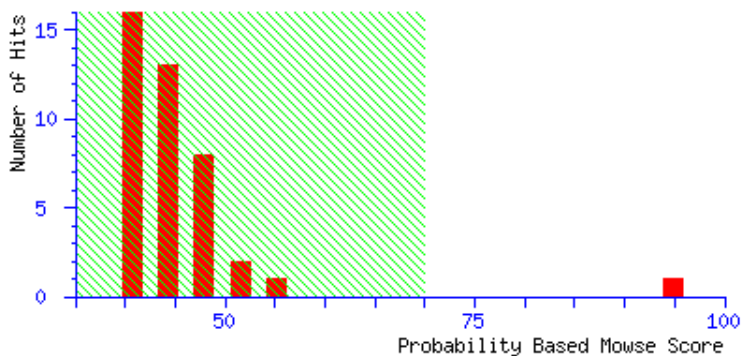



Matched peptide sequences: shown in **Bold Red**

**1 MVHDYATTTN GTSKR**CSALP TTINTVDVSSV SDLFEFICSG PLVNK**IGITP**  
**51 QRVGQSIDKW** LLYGSQLCRL **FQLNELKLT**I **PQK**ARLYHYY IPVFIWCEDQ  
**101 IALHNSKFKD** GDDVPPLVIG FSAPQCGGKT TLVFALDYLF KTTKKKSATI  
**151 SVDDFYLTAE** GQAE LRKKNP GNALLEYRGN AGSHDLKLSV ETLEALSFLT  
**201 KEGLMKVPR** YNK**SAYSGR**G DRADSSTWPE VEGPLSVILF EGWMLGFKPL  
**251 PADVVKAVDP** QLEVVN**KNLE** **AYYDAWDK**YI DAWVVI**KIQD** **PSYVYR**WRLQ  
**301 AEIAMR**QDGQ AGMSDEEVND FVSR**YLPAYK** **AYLPTLYAEG** **PSGSDPDR**VL  
**351 AIDIDEERNP** ILAN

Matched peptides information:

| Start - End | Observed  | Mr(expt)  | Mr(calc)  | ppm  | Miss | Sequence               |               |
|-------------|-----------|-----------|-----------|------|------|------------------------|---------------|
| 1 - 14      | 1541.6594 | 1540.6521 | 1540.6828 | -20  | 0    | -.MVHDYATTTNGTSK.R     | Oxidation (M) |
| 2 - 15      | 1550.5195 | 1549.5122 | 1549.7485 | -152 | 1    | M.VHDYATTTNGTSK.R      |               |
| 46 - 52     | 784.3154  | 783.3081  | 783.4603  | -194 | 0    | K.IGITPQR.V            |               |
| 70 - 77     | 1004.4830 | 1003.4757 | 1003.5702 | -94  | 0    | R.LFQLNELK.L           |               |
| 70 - 83     | 1684.8484 | 1683.8411 | 1683.9923 | -90  | 1    | R.LFQLNELKLTPQK.A      |               |
| 206 - 210   | 646.2557  | 645.2484  | 645.3632  | -178 | 1    | K.MKVPR.Y              | Oxidation (M) |
| 214 - 219   | 640.2194  | 639.2121  | 639.2976  | -134 | 0    | K.SAYSGR.G             |               |
| 268 - 278   | 1387.5521 | 1386.5448 | 1386.6092 | -46  | 0    | K.NLEAYYDAWDK.Y        |               |
| 288 - 296   | 1140.5280 | 1139.5207 | 1139.5611 | -35  | 0    | K.IQDPSYVYR.W          |               |
| 299 - 306   | 931.4116  | 930.4044  | 930.4957  | -98  | 0    | R.LQAEIAMR.Q           |               |
| 299 - 306   | 947.4067  | 946.3994  | 946.4906  | -96  | 0    | R.LQAEIAMR.Q           | Oxidation (M) |
| 325 - 330   | 754.3030  | 753.2957  | 753.4061  | -147 | 0    | R.YLPAYK.A             |               |
| 331 - 348   | 1908.8467 | 1907.8394 | 1907.8901 | -27  | 0    | K.AYLPTLYAEGPSGSDPDR.V |               |

Spot No.: **137**

Mascot score: **163**    Sequence coverage %: **37**

NCBI accession No.: **gi| 27752799**

Matched peptides No.: **23**

Total peptides No.: **100**

Calculated Mr: **47920**

Calculated pI: **6.12**

### Annotated PMF spectra:

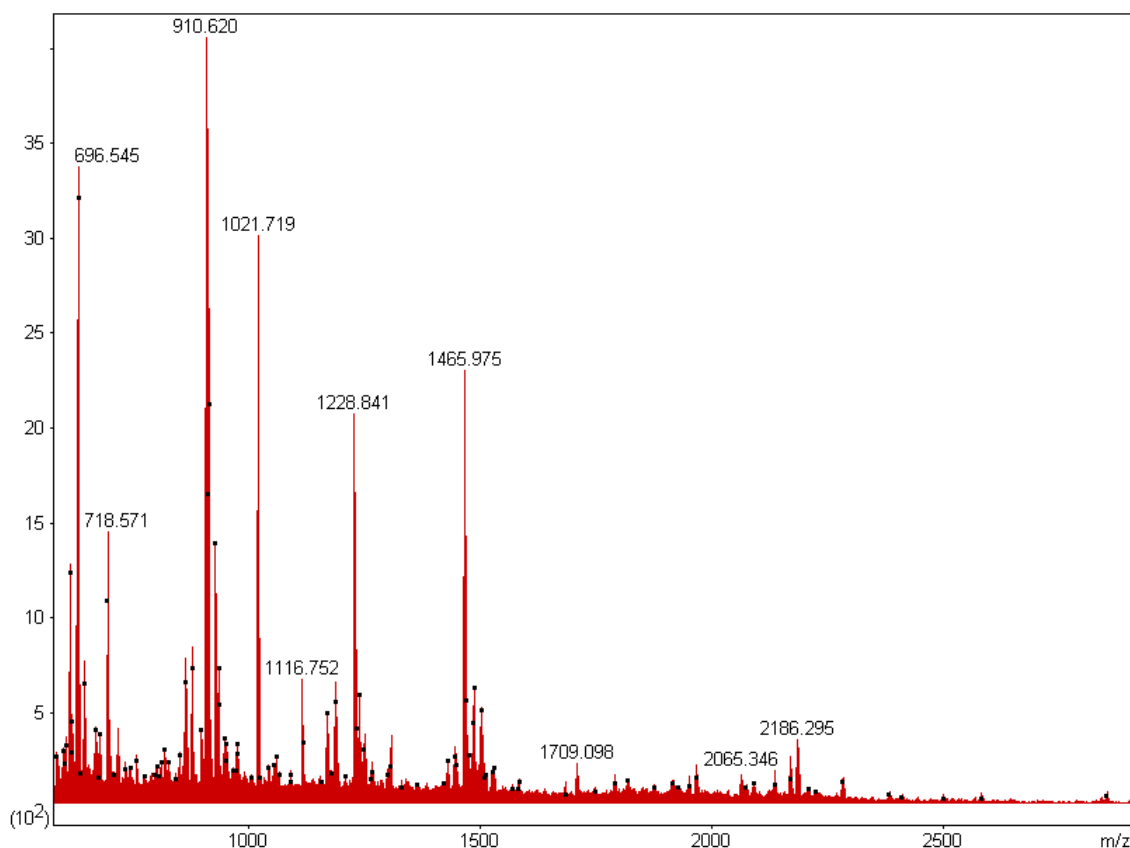

### Probability Based Mowse Score:

Protein score is  $-10 \cdot \log(P)$ , where P is the probability that the observed match is a random event. Protein scores greater than 72 are significant ( $p < 0.05$ ).

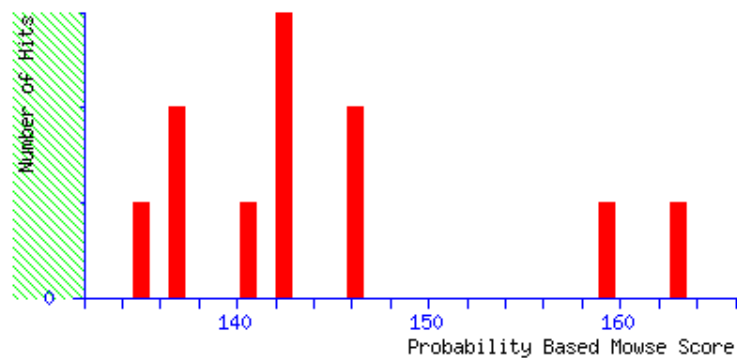

## Matched peptide sequences: shown in **Bold Red**

**1** KLTYYTPEYE **TKD**T**DILAA**F**** RVTPQPGVPP EEAGAAVAEE SSTGTWTTVM  
**51** TDGLTSLDRY KGRCYHIEPV PGEETQFIAY VAYPLDLFEE GSVTNMFTSI  
**101** VGNVFGFKAL **AAL**R**LEDL**R**** PPAYTK**T**F**Q**G**** **PP**H**GI**Q**VER**D**** **KL**N**K**Y**GR**P**LL**  
**151** GCTIKPKLGL SAKNYGRA**V**Y **E**C**L**R**G**G**L**D**F**T**** **K**D**D**E**N**V**N**S**Q**P**** **F**M**R**W**R**D**R**F**L**F****  
**201** CAEAIYKSQA ETGEIK**G**H**Y**L**** **N**A**T**A**G**T**C**E**E**M**** **I**K**R**A**V**F**A**R**E**L**** **G**V**P**I**V**M**H**D**Y**L****  
**251** TGGFTANTSL SHYCR**D**N**G**L**L** **L**H**I**H**R**A**M**H**A**V**** **I**D**R**Q**K**N**H**G**M**H**** **F**R**V**L**A**K**A**L**R**L****  
**301** **S**G**G**D**H**I**H**A**G**T**** **V**V**G**K**L**E**G**D**R**E**** **S**T**L**G**F**V**D**L**L**R**** **D**D**Y**V**E**K**D**R**S**R**** **G**I**F**F**T**Q**D**W**V**S****  
**351** LPGVLPV**A**S**G** **G**I**H**V**W**H**M**P**A**L**** **T**E**I**F**G**D**D**S**V**L**** **Q**F**G**G**G**T**L**G**H**P**** **W**G**N**A**P**G**A**V**A**N****  
**401** **R**V**A**L**E**A**C**V**Q**A**** **R**N**E**G**R**D**L**A**V**E**** **G**N**E**I**I**R**E**A**C**K****

## Matched peptides information:

| Start - End | Observed  | Mr(expt)  | Mr(calc)  | ppm | Miss | Sequence                                      |
|-------------|-----------|-----------|-----------|-----|------|-----------------------------------------------|
| 13 - 21     | 1021.7192 | 1020.7119 | 1020.5240 | 184 | 0    | K.DTDILAAFR.V                                 |
| 109 - 114   | 614.5770  | 613.5697  | 613.3911  | 291 | 0    | K.ALAALR.L                                    |
| 109 - 119   | 1240.9074 | 1239.9001 | 1239.7299 | 137 | 1    | K.ALAALRLEDLR.I                               |
| 115 - 119   | 645.5211  | 644.5138  | 644.3493  | 255 | 0    | R.LEDLR.I                                     |
| 127 - 139   | 1465.9745 | 1464.9672 | 1464.7474 | 150 | 0    | K.TFQGGPPHGIQVER.D                            |
| 127 - 141   | 1709.0982 | 1708.0909 | 1707.8693 | 130 | 1    | K.TFQGGPPHGIQVERD.K.L                         |
| 168 - 174   | 910.6204  | 909.6132  | 909.4378  | 193 | 0    | R.AVYECLR.G                                   |
| 175 - 193   | 2170.2591 | 2169.2518 | 2168.9797 | 125 | 1    | R.GGLDFTKDDENVNSQP <b>FMR.W</b>               |
| 175 - 193   | 2186.2950 | 2185.2877 | 2184.9746 | 143 | 1    | R.GGLDFTKDDENVNSQP <b>FMR.W</b> Oxidation (M) |
| 194 - 197   | 632.4821  | 631.4748  | 631.3190  | 247 | 1    | R.WRDR.F                                      |
| 217 - 233   | 1951.1448 | 1950.1375 | 1949.9087 | 117 | 1    | K.GHYLNATAGTCEMIKR.A                          |
| 217 - 233   | 1967.1767 | 1966.1694 | 1965.9037 | 135 | 1    | K.GHYLNATAGTCEMIKR.A Oxidation (M)            |
| 266 - 275   | 1187.8352 | 1186.8279 | 1186.6571 | 144 | 0    | R.DNGLLLHHR.A                                 |
| 276 - 283   | 912.6357  | 911.6284  | 911.4647  | 180 | 0    | R.AMHAVIDR.Q                                  |
| 276 - 283   | 928.6206  | 927.6134  | 927.4596  | 166 | 0    | R.AMHAVIDR.Q Oxidation (M)                    |
| 284 - 292   | 1170.7794 | 1169.7721 | 1169.5512 | 189 | 1    | R.QKNHGMHFR.V Oxidation (M)                   |
| 286 - 292   | 898.5647  | 897.5575  | 897.4028  | 172 | 0    | K.NHGMHFR.V                                   |
| 286 - 292   | 914.5761  | 913.5688  | 913.3977  | 187 | 0    | K.NHGMHFR.V Oxidation (M)                     |
| 300 - 314   | 1447.9248 | 1446.9175 | 1446.7579 | 110 | 0    | R.LSGGDHINAGTVVGK.L                           |
| 315 - 330   | 1820.1763 | 1819.1690 | 1818.9476 | 122 | 1    | K.LEGDRESTLGFVDLLR.D                          |
| 320 - 330   | 1249.8243 | 1248.8170 | 1248.6714 | 117 | 0    | R.ESTLGFVDLLR.D                               |
| 402 - 411   | 1116.7520 | 1115.7447 | 1115.5757 | 152 | 0    | R.VALEACVQAR.N                                |
| 416 - 426   | 1228.8415 | 1227.8342 | 1227.6459 | 153 | 0    | R.DLAVEGNEIIR.E                               |

Spot No.: **138**

Mascot score: **140**    Sequence coverage %: **38**

NCBI accession No.: **gi| 15222551**

Matched peptides No.: **17**

Total peptides No.: **31**

Calculated Mr: **44721**

Calculated pI: **5.71**

### Annotated PMF spectra:

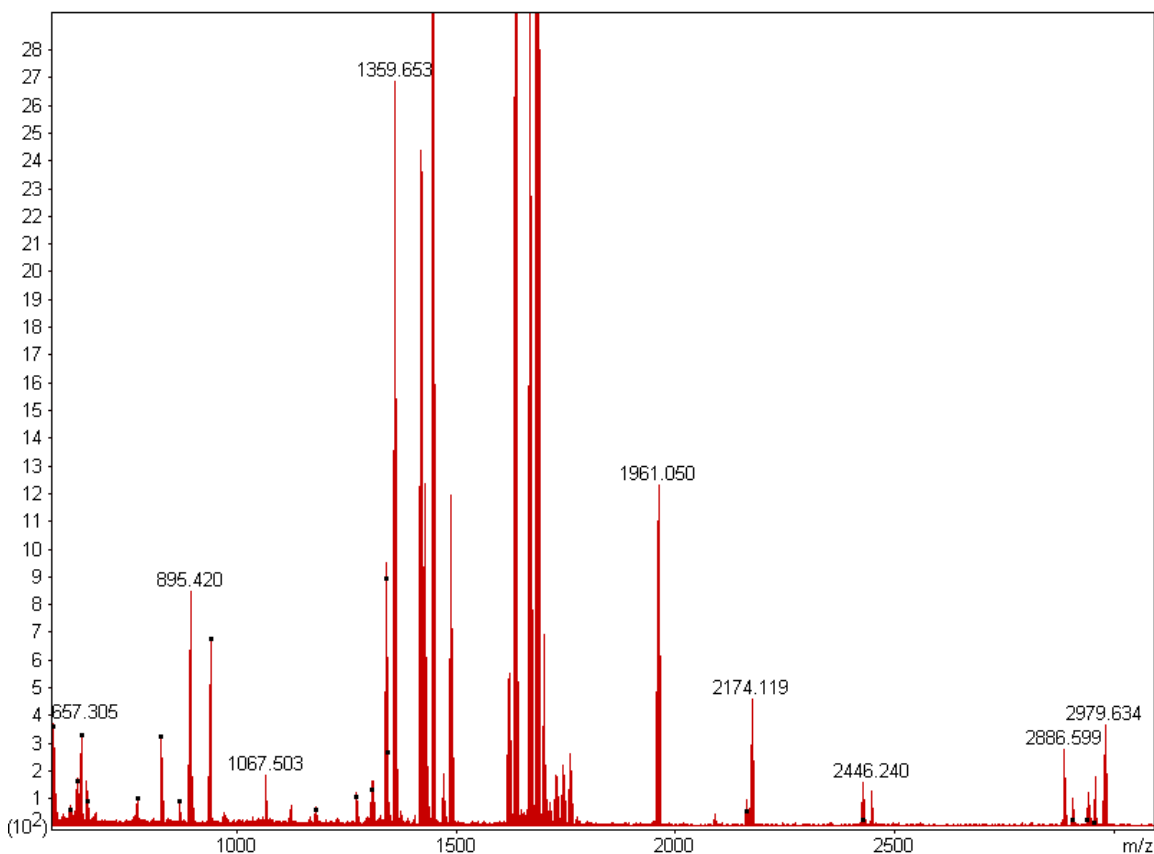

### Probability Based Mowse Score:

Protein score is  $-10 \cdot \log(P)$ , where P is the probability that the observed match is a random event. Protein scores greater than 72 are significant ( $p < 0.05$ ).

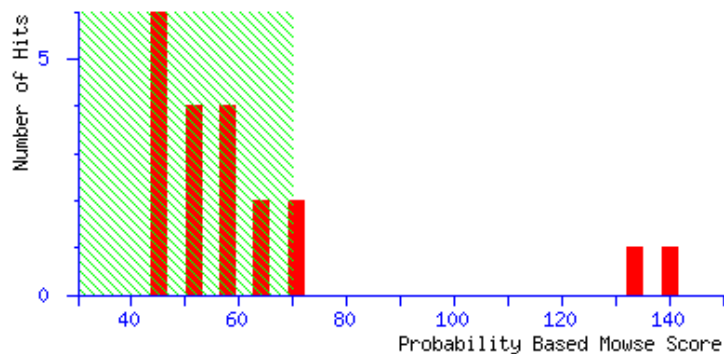

Matched peptide sequences: shown in **Bold Red**

**1** MAVSTIYSTQ ALNSTHFLTS SSSSKQVFLY RRQPQTNRFF NTLITCAQET  
**51** IVIGLAADSG CGK**STFMRRL** TSVFGGAAKP PKGGN**PDSNT LISDTT****TVIC**  
**101** **LDDYHSLDRY** GRKEQKV**TAL DPRAN****DFDLM YEQVK**ALKN**G IAVEK**PIY**NH**  
**151** VTGLLD**PPEL IQPPK****ILVIE GLH**PM**FDERV** RDLLDFSIYL DISNEVK**FAW**  
**201** KIQR**DMAERG HSLES****IKASI EARKP****DFDAF IDPQK**QYADA VIEVL**P**TTLI  
**251** PDDNEGK**VLRLIM**KEGVK YFSPVYLFDE GSTISWIPCG RKL**TCS**YPGI  
**301** **KFNYEPDSYF DHEVSV****LEMD GQFDR****LDELI YVESHL****SNLS TKFYGE****VTQQ**  
**351** **MLK**HAD**FPGS NNGT**GLFQTI VGL**KIRDL****YE QL**IANKATAR AEAKA

Matched peptides information:

| Start - End | Observed  | Mr(expt)  | Mr(calc)  | ppm | Miss | Sequence                                           |
|-------------|-----------|-----------|-----------|-----|------|----------------------------------------------------|
| 64 - 68     | 657.3046  | 656.2973  | 656.2952  | 3   | 0    | K.STFMR.R Oxidation (M)                            |
| 83 - 109    | 2979.6342 | 2978.6269 | 2978.3564 | 91  | 0    | K.GGNPDSNTLISDTT <b>TVICLDDYHSLDR.Y</b>            |
| 124 - 135   | 1472.6747 | 1471.6674 | 1471.6653 | 1   | 0    | R.A <b>NDFDL</b> MYEQVK.A                          |
| 124 - 135   | 1488.6843 | 1487.6770 | 1487.6602 | 11  | 0    | R.A <b>NDFDL</b> MYEQVK.A Oxidation (M)            |
| 166 - 179   | 1668.8171 | 1667.8098 | 1667.8705 | -36 | 0    | K.I <b>LVIEGLH</b> PMFDER.V                        |
| 166 - 179   | 1684.8915 | 1683.8842 | 1683.8654 | 11  | 0    | K.I <b>LVIEGLH</b> PMFDER.V Oxidation (M)          |
| 205 - 209   | 621.3171  | 620.3098  | 620.2588  | 82  | 0    | R.D <b>MAER.G</b>                                  |
| 205 - 209   | 637.2711  | 636.2638  | 636.2537  | 16  | 0    | R.D <b>MAER.G</b> Oxidation (M)                    |
| 210 - 217   | 870.4720  | 869.4648  | 869.4607  | 5   | 0    | R.G <b>HSLESIK.A</b>                               |
| 218 - 223   | 646.3613  | 645.3540  | 645.3446  | 15  | 0    | K.A <b>SIEAR.K</b>                                 |
| 224 - 235   | 1420.6985 | 1419.6912 | 1419.7034 | -9  | 0    | R.K <b>PDFDAFIDPQK.Q</b>                           |
| 302 - 325   | 2939.5152 | 2938.5079 | 2938.2392 | 91  | 0    | K.F <b>NYEPDSYFDHEVSVLEMDGQFDR.L</b>               |
| 302 - 325   | 2955.5042 | 2954.4969 | 2954.2341 | 89  | 0    | K.F <b>NYEPDSYFDHEVSVLEMDGQFDR.L</b> Oxidation (M) |
| 326 - 342   | 1961.0503 | 1960.0430 | 1960.0153 | 14  | 0    | R.L <b>DELIYVESHL</b> SNLSTK.F                     |
| 343 - 353   | 1343.6355 | 1342.6282 | 1342.6591 | -23 | 0    | K.F <b>YGEVTQQMLK.H</b>                            |
| 343 - 353   | 1359.6527 | 1358.6454 | 1358.6540 | -6  | 0    | K.F <b>YGEVTQQMLK.H</b> Oxidation (M)              |
| 375 - 386   | 1475.7386 | 1474.7313 | 1474.8143 | -56 | 1    | K.I <b>RDLYEQLIANK.A</b>                           |

Spot No.: **139**

Mascot score: **93** Sequence coverage %: **48**

NCBI accession No.: **gi| 13926291**

Matched peptides No.: **15**

Total peptides No.: **122**

Calculated Mr: **35335**

Calculated pI: **5.55**

### Annotated PMF spectra:

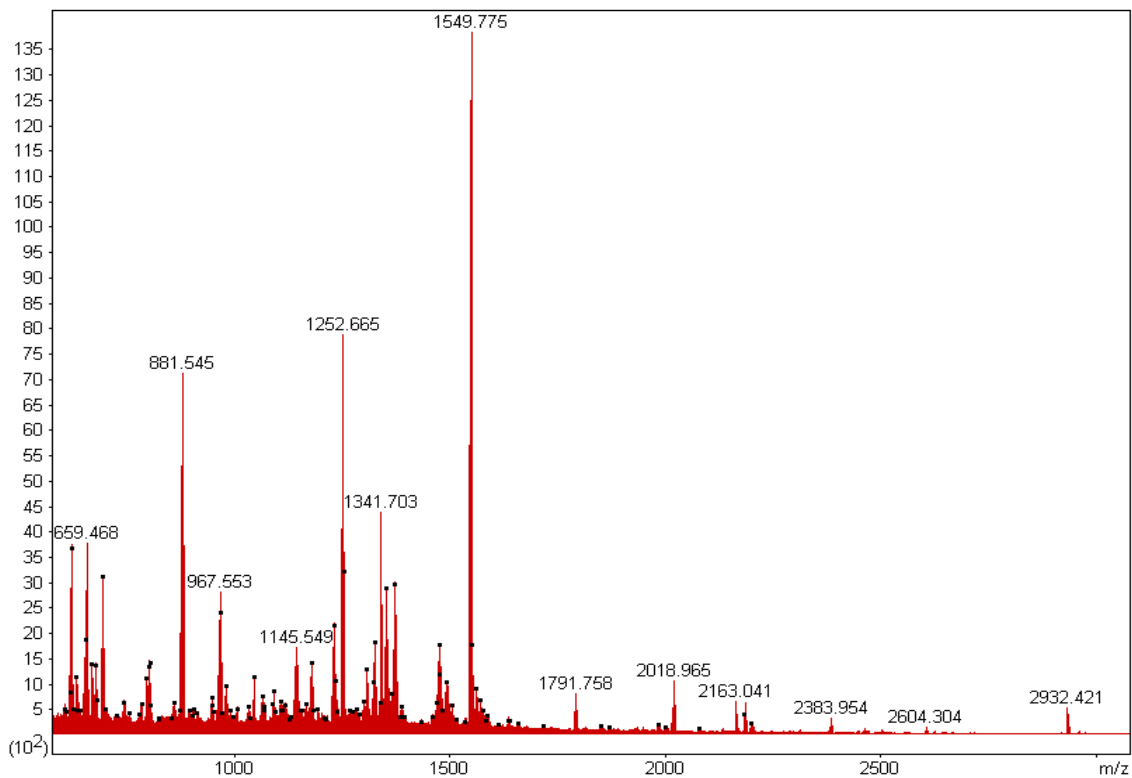

### Probability Based Mowse Score:

Protein score is  $-10 \cdot \log(P)$ , where P is the probability that the observed match is a random event. Protein scores greater than 72 are significant ( $p < 0.05$ ).

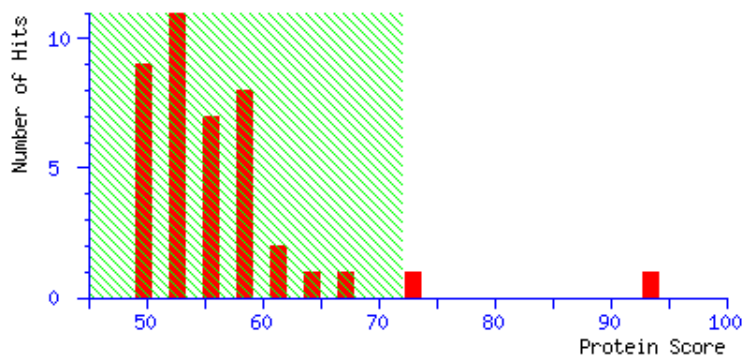

Matched peptide sequences: shown in **Bold Red**

1 MAASLQSTAT FLQSAKIATA **PSRGSSHLRS** TQAVGKSFGL ETSSARLTCS  
 51 **FQSDFK**DFTG KCSDAVKIAG FALATSALVV SGASAEGAPK **RLTYDEIQSK**  
 101 **TYMEVK**GTGT ANQCPTIDGG SETFSFKPGK YAGKKKCFEP TSFTVKADSV  
 151 **SKNAPPEFQN** TKLMTRLTYT LDEIEGPFV ASDGSVNFKE **EDGIDYAAVT**  
 201 **VQLPGGERVP** **FLFTVKQLDA** **SGKPD**SFTGK **FLVPSYRGSS** **FLDPKGRGGS**  
 251 **TGYDNAVALP** **AGGRGDEEEL** **VKENVKNSAA** **SVGEITLKVT** **KSKPETGEVI**  
 301 **GVFESLQPSD** **TDLGAK**VPKD VKIQGVWYGQ LE

Matched peptides information:

| Start - End | Observed  | Mr (expt) | Mr (calc) | ppm | Miss | Sequence                      |
|-------------|-----------|-----------|-----------|-----|------|-------------------------------|
| 24 - 36     | 1327.6472 | 1326.6399 | 1326.7004 | -46 | 1    | R.GSSHLRSTQAVGK.S             |
| 47 - 56     | 1232.5979 | 1231.5906 | 1231.5543 | 29  | 0    | R.LTCSFQSDFK.D                |
| 91 - 100    | 1252.6651 | 1251.6578 | 1251.6459 | 10  | 1    | K.RLTYDEIQSK.T                |
| 92 - 100    | 1096.5341 | 1095.5268 | 1095.5448 | -16 | 0    | R.LTYDEIQSK.T                 |
| 101 - 106   | 786.4901  | 785.4828  | 785.3629  | 153 | 0    | K.TYMEVK.G Oxidation (M)      |
| 147 - 152   | 606.3794  | 605.3722  | 605.3020  | 116 | 0    | K.ADSVSK.N                    |
| 153 - 162   | 1145.5487 | 1144.5414 | 1144.5513 | -9  | 0    | K.NAPPEFQNTK.L                |
| 190 - 208   | 2018.9649 | 2017.9576 | 2017.9593 | -1  | 0    | K.EEDGIDYAAVTVQLPGER.V        |
| 209 - 216   | 950.5348  | 949.5275  | 949.5637  | -38 | 0    | R.VFFLFTVK.Q                  |
| 224 - 237   | 1613.7542 | 1612.7469 | 1612.8250 | -48 | 1    | K.PDSFTGKFLVPSYR.G            |
| 231 - 237   | 881.5445  | 880.5373  | 880.4807  | 64  | 0    | K.FLVPSYR.G                   |
| 248 - 264   | 1562.7964 | 1561.7891 | 1561.7485 | 26  | 0    | R.GGSTGYDNAVALPAGGR.G         |
| 265 - 276   | 1388.6855 | 1387.6782 | 1387.6831 | -3  | 1    | R.GDEEELVKENK.N               |
| 273 - 288   | 1659.7999 | 1658.7926 | 1658.8839 | -55 | 1    | K.ENVKNSAASVGEITLK.V          |
| 292 - 316   | 2604.3037 | 2603.2964 | 2603.2966 | -0  | 1    | K.SKPETGEVIGVFESLQPSDSDLGAK.V |

Spot No.: **140**

Mascot score: **103**    Sequence coverage %: **20**

NCBI accession No.: **gi| 154017627**

Matched peptides No.: **8**

Total peptides No.: **23**

Calculated Mr: **47865**

Calculated pI: **6.04**

### Annotated PMF spectra:

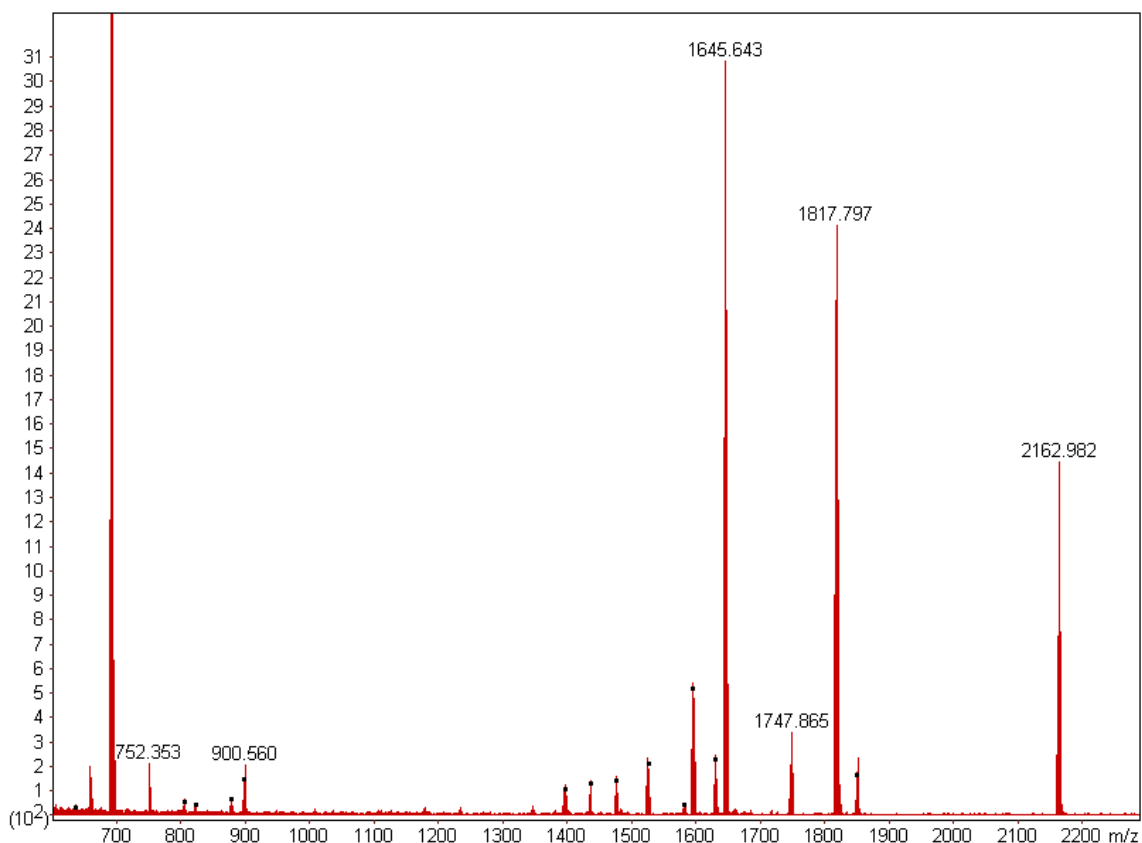

### Probability Based Mowse Score:

Protein score is  $-10 \cdot \log(P)$ , where P is the probability that the observed match is a random event. Protein scores greater than 72 are significant ( $p < 0.05$ ).

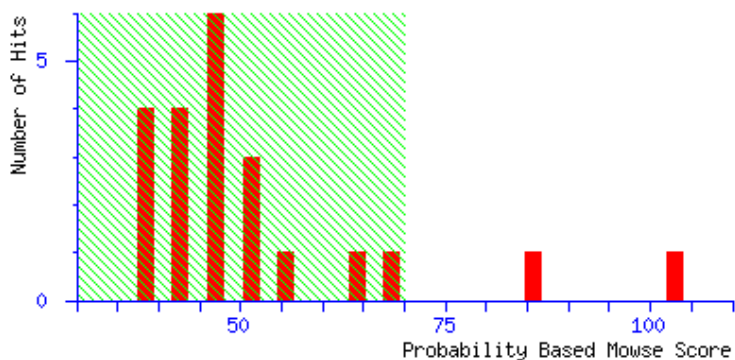



Matched peptide sequences: shown in **Bold Red**

**1 MAQILAPSMQ CQMKLSKGLT SSMTSPWTS ILLKQGQKGS** IKCSTKFRVC  
**51 ASLQSDHGTV NRVEQLLNLD VTPYTDKIIA** EYIWIGGTGI DLRSKSRTL  
**101 KPVEHPSELP KWNVDGSSTG QAPGQDSEVI** LYPQAIKDP FRGGNNILVI  
**151 CDAYTPAGEP IPTNKRHKA** EIFNMQKVAS EVPWFGIEQE YTLQPNVSW  
**201 PLGWVPGAYP GPQGPYYCGV GADKSFGRDV** SDAHAKACLY AGINISGTNG  
**251 EVMPGQWEFQ VGPSVGIEAG DHVWCARYLL ERITEQIGVV** MTLDPKPIEG  
**301 DWNGAGCHTN YSTKTMREEG GFEVIKKAIL NLSLRHKDHI** SAYGEGNERR  
**351 LTGKHETADI NTFSWGVANR GCSIRVGRDT** EKEGKGYLED RRPASNMDPY  
**401 VVTGLLAETT ILWEPTLEAE ALAAQKLSLN** V

Matched peptides information:

| Start - End | Observed  | Mr(expt)  | Mr(calc)  | ppm | Miss Sequence                           |
|-------------|-----------|-----------|-----------|-----|-----------------------------------------|
| 2 - 17      | 1849.7922 | 1848.7849 | 1848.9260 | -76 | 1 M.AQILAPSMQCQMKLSK.G Oxidation (M)    |
| 15 - 34     | 2162.9815 | 2161.9742 | 2162.1657 | -89 | 1 K.LSKGLTSSMTSPWTSILLK.Q Oxidation (M) |
| 63 - 77     | 1747.8653 | 1746.8580 | 1746.9040 | -26 | 0 R.VEQLLNLDVTPYTDK.I                   |
| 278 - 282   | 693.3967  | 692.3894  | 692.3857  | 5   | 0 R.YLLER.I                             |
| 328 - 335   | 899.5485  | 898.5412  | 898.5600  | -21 | 0 K.AILNLSLR.H                          |
| 355 - 370   | 1817.7971 | 1816.7898 | 1816.8493 | -33 | 0 K.HETADINTFSWGVANR.G                  |
| 371 - 375   | 592.3017  | 591.2944  | 591.2799  | 25  | 0 R.GCSIR.V                             |
| 386 - 391   | 752.3533  | 751.3460  | 751.3501  | -5  | 0 K.GYLED.R                             |

Spot No.: **141**

Mascot score: **114**    Sequence coverage %: **28**

NCBI accession No.: **gi| 15233888**

Matched peptides No.: **13**

Total peptides No.: **27**

Calculated Mr: **46526**

Calculated pI: **6.08**

### Annotated PMF spectra:

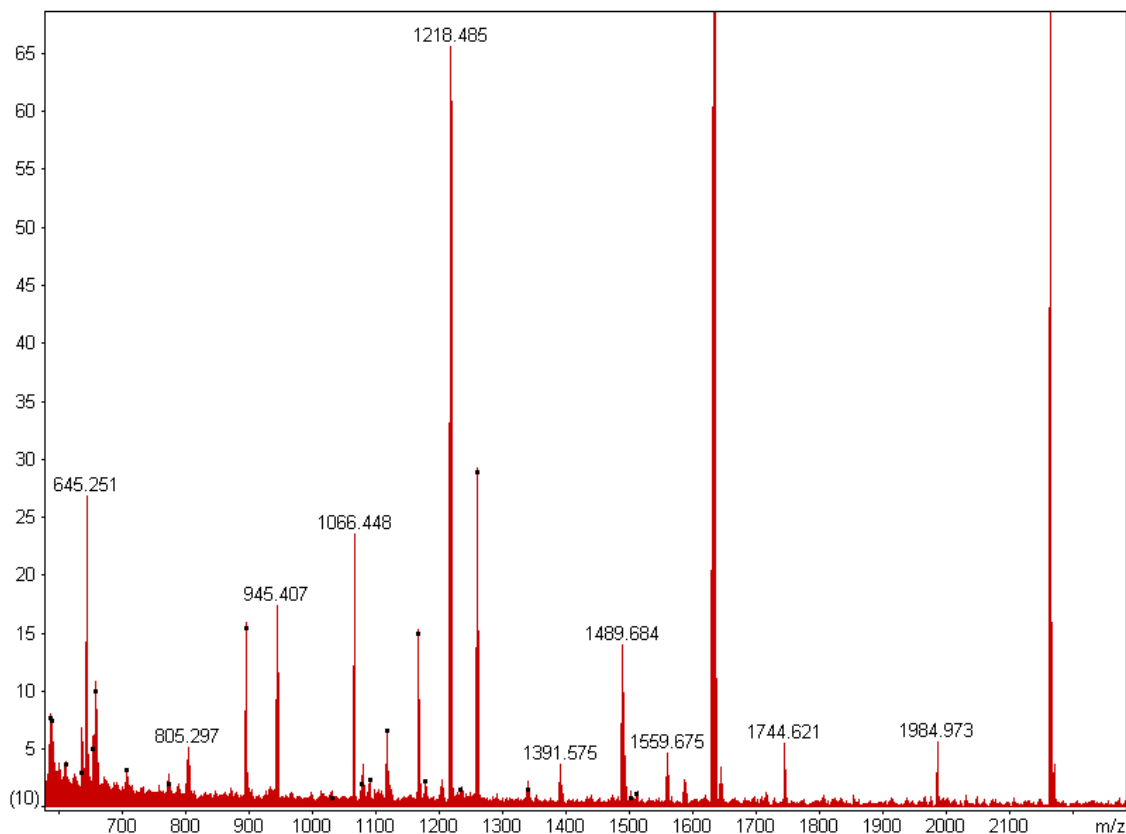

### Probability Based Mowse Score:

Protein score is  $-10 \cdot \log(P)$ , where P is the probability that the observed match is a random event. Protein scores greater than 72 are significant ( $p < 0.05$ ).

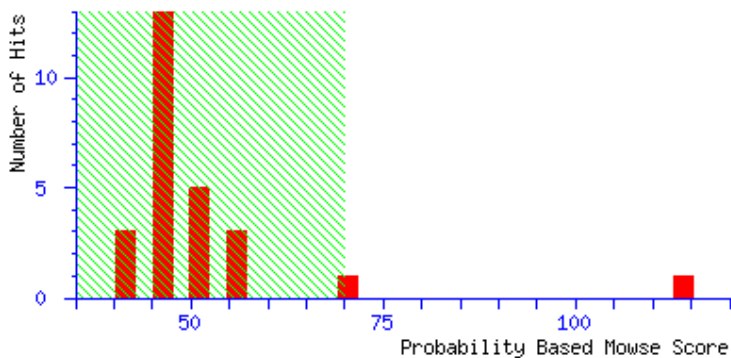

Matched peptide sequences: shown in **Bold Red**

```

1  MASLLGTSSS AIWASPSLSS PSSKPPSSSPI CFRPGKLFGS KLNAGIQIRP
51  KKNRSRYHVS VMNVATEINS TEQVVGKFDS KKSARPVYYPF AAIVGQDEMK
101 LCLLLNVIDP KIGGVMIMGD RGTGKSTTVR SLVDLLPEIN VVAGDPYNSD
151 PIDPEFMGVE VRERVEKGEQ VPVIATKIMM VDLPLGATED RVCGTIDIEK
201 ALTEGVKAFF PGLLAKANRG ILYVDEVNLL DDHLVDVLLD SAASGWNNTVE
251 REGISISHPA RFILIGSGNP EEGELRPQLL DRFGMHAQVG TVRDADLRVK
301 IVEERARFDS NPKDFRDYK TEQDKLQDQI STARANLSSV QIDRELKVKI
351 SRVCSSELNVD GLRGDIVTNR AAKALAALKG KDRVTPDDVA TVIPNCLRHR
401 LRKDPLESID SGVLVSEKFA EIFS

```

Matched peptides information:

| Start - End | Observed  | Mr(expt)  | Mr(calc)  | ppm  | Miss | Sequence                         |
|-------------|-----------|-----------|-----------|------|------|----------------------------------|
| 112 - 125   | 1391.5753 | 1390.5680 | 1390.7061 | -99  | 1    | K.IGGVMIMGDRGTGK.S               |
| 178 - 191   | 1559.6747 | 1558.6674 | 1558.7661 | -63  | 0    | K.INMVDLPLGATEDR.V Oxidation (M) |
| 208 - 216   | 945.4066  | 944.3994  | 944.5331  | -142 | 0    | K.AFEPGLLAK.A                    |
| 252 - 261   | 1066.4485 | 1065.4412 | 1065.5567 | -108 | 0    | R.EGISISHPAR.F                   |
| 283 - 293   | 1218.4854 | 1217.4781 | 1217.5975 | -98  | 0    | R.FGMHAQVGTVR.D Oxidation (M)    |
| 294 - 298   | 589.1955  | 588.1882  | 588.2867  | -167 | 0    | R.DADLR.V                        |
| 301 - 305   | 645.2508  | 644.2435  | 644.3493  | -164 | 0    | K.IVEER.A                        |
| 308 - 313   | 707.2008  | 706.1936  | 706.3286  | -191 | 0    | R.FDSNPK.D                       |
| 321 - 334   | 1632.7068 | 1631.6995 | 1631.8115 | -69  | 1    | K.TEQDKLQDQISTAR.A               |
| 326 - 334   | 1031.4367 | 1030.4294 | 1030.5407 | -108 | 0    | K.LQDQISTAR.A                    |
| 353 - 363   | 1261.5227 | 1260.5154 | 1260.6132 | -78  | 0    | R.VCSSELNVDGLR.G                 |
| 364 - 370   | 774.2940  | 773.2867  | 773.4032  | -151 | 0    | R.GDIVTNR.A                      |
| 404 - 418   | 1587.7119 | 1586.7046 | 1586.8039 | -63  | 0    | K.DPLESIDSGVLVSEK.F              |

Spot No.: **142**

Mascot score: **101**    Sequence coverage %: **34**

NCBI accession No.: **gi| 297841979**

Matched peptides No.: **12**

Total peptides No.: **28**

Calculated Mr: **32482**

Calculated pI: **5.03**

### Annotated PMF spectra:

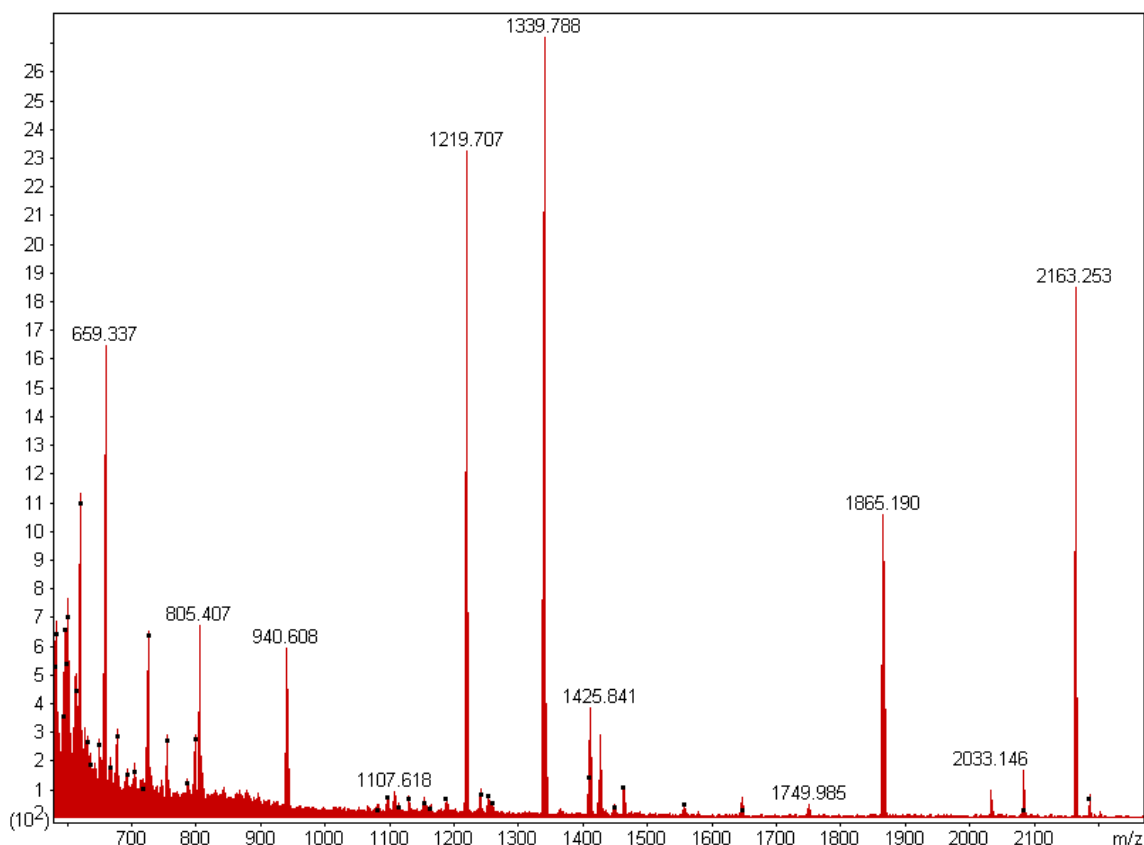

### Probability Based Mowse Score:

Protein score is  $-10 \cdot \log(P)$ , where P is the probability that the observed match is a random event. Protein scores greater than 72 are significant ( $p < 0.05$ ).

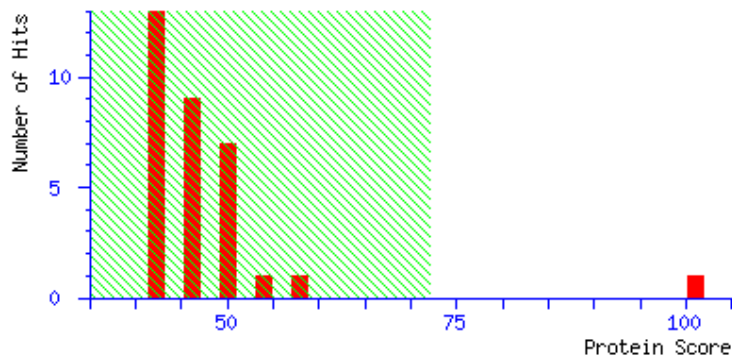

Matched peptide sequences: shown in **Bold Red**

```

  1 MATNGSASSA QLSQKEADV R MMCAAEEVHLG TKNCNYQMER YVFKRRNDGI
 51 YIFNLGKTWD KLQMAARVIV AIENPQDIIV QSARPYGQRA VLKFAQYTGA
101 NAIAGRHTPG TFTNQMQTSF SEPRLILTD PRTDHPPIKE GALGNIPIIA
151 FCDTDSMPRF VDIGIPANNK GKHSIGCLFW LLARMVLQMR GTIGAAQKWD
201 VMVDLFFYRE PEETKPEDED EAAPQAEYGL PAPEYGMVGG DQWTTAQIPD
251 AAWPGEAQAP ISAAPAAGSW SDSAAAPADG GWDTAVPPPG APAAGWE

```

Matched peptides information:

| Start - End | Observed  | Mr(expt)  | Mr(calc)  | ppm | Miss | Sequence                             |
|-------------|-----------|-----------|-----------|-----|------|--------------------------------------|
| 33 - 40     | 1114.5496 | 1113.5423 | 1113.4331 | 98  | 0    | K.NCNYQMER.Y                         |
| 33 - 40     | 1130.5271 | 1129.5198 | 1129.4281 | 81  | 0    | K.NCNYQMER.Y Oxidation (M)           |
| 46 - 57     | 1409.8755 | 1408.8682 | 1408.7463 | 87  | 1    | R.RNDGIYIFNLGK.T                     |
| 47 - 57     | 1253.7313 | 1252.7240 | 1252.6452 | 63  | 0    | R.RNDGIYIFNLGK.T                     |
| 58 - 67     | 1219.7069 | 1218.6996 | 1218.6179 | 67  | 1    | K.TWDLQMAAR.V                        |
| 62 - 67     | 705.3059  | 704.2987  | 704.3639  | -93 | 0    | K.LQMAAR.V Oxidation (M)             |
| 68 - 84     | 1865.1899 | 1864.1826 | 1864.0418 | 76  | 0    | R.VIVAIENPQDIIVQSAR.P                |
| 85 - 89     | 620.2695  | 619.2622  | 619.3078  | -74 | 0    | R.PYGQR.A                            |
| 94 - 106    | 1339.7878 | 1338.7805 | 1338.6680 | 84  | 0    | K.FAQYTGANAIAGR.H                    |
| 107 - 124   | 2082.0874 | 2081.0801 | 2080.9273 | 73  | 0    | R.HTPGTFTNQMQTSFSEPR.L Oxidation (M) |
| 125 - 132   | 940.6075  | 939.6003  | 939.5753  | 27  | 0    | R.LLILTDPR.T                         |
| 160 - 170   | 1187.6857 | 1186.6784 | 1186.6346 | 37  | 0    | R.FVDIGIPANNK.G                      |

Spot No.: **143**

Mascot score: **191**    Sequence coverage %: **37**

NCBI accession No.: **gi| 15228149**

Matched peptides No.: **16**

Total peptides No.: **23**

Calculated Mr: **42787**

Calculated pI: **6.17**

### Annotated PMF spectra:

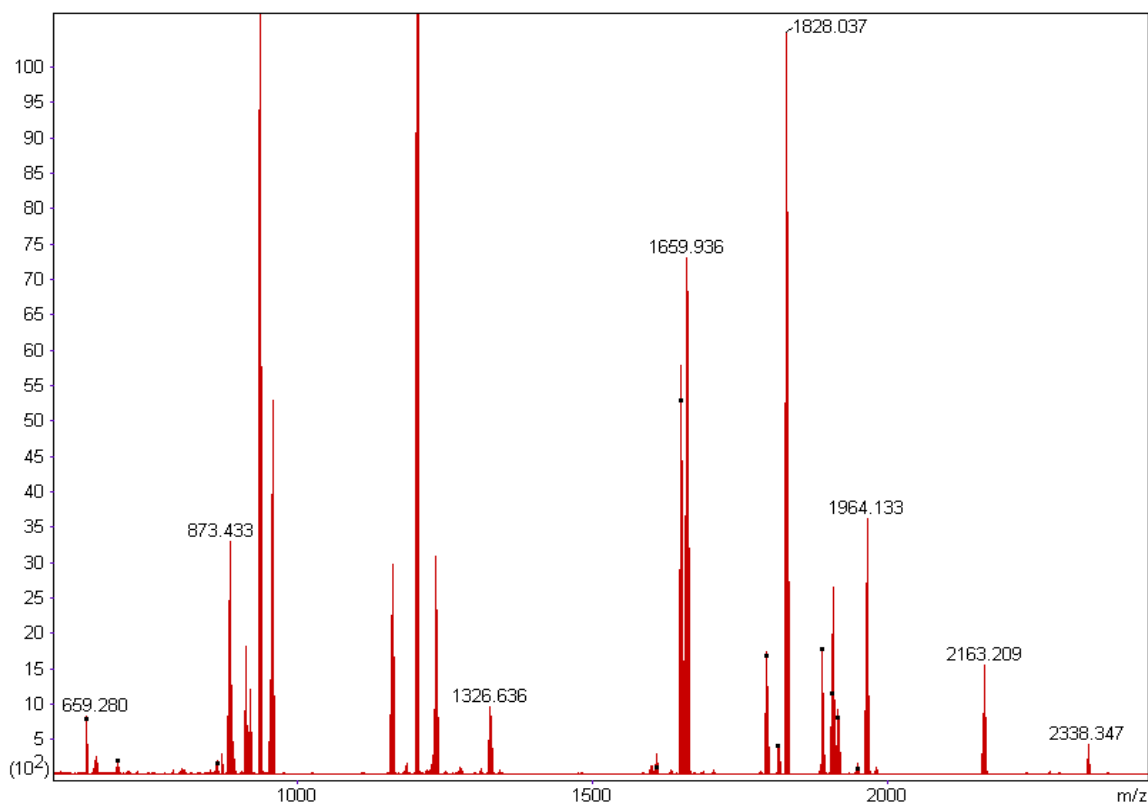

### Probability Based Mowse Score:

Protein score is  $-10 \cdot \log(P)$ , where P is the probability that the observed match is a random event. Protein scores greater than 72 are significant ( $p < 0.05$ ).

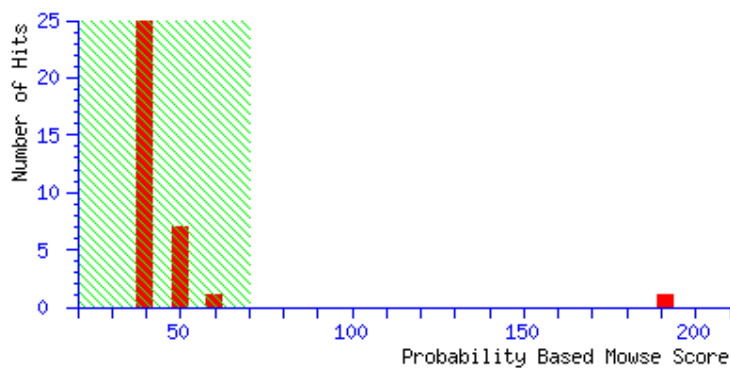

Matched peptide sequences: shown in **Bold Red**

```

1  METSIACYSR GILPPSVSSQ RSSTLVSPPS YSTSSSFKRL KSSSIFGDSL
51  RLAPKSQLKA TKAKSNGAST VTKCEIGQSL EEFLAQATPD KGLRTLLMCM
101 GEALRTIAFK VRTASCGGTA CVNSFGDEQL AVDMLADKLL FEALQYSHVC
151 KYACSEEVPE LQDMGGPVEG GFSVAFDPLD GSSIVDTNFT VGTIFGVWPG
201 DKLTGITGGD QVAAAMGIYG PRTTYVLAVK GFPGTHEFL LDEGKWQHVK
251 ETTEIAEGKM FSPGNLRATF DNSEYSKLID YYVKEKYTLR YTGGMVPDVN
301 QIIVKEKGIF TNVTSPTAKA KLRLLEFEVAP LGLLIENAGG FSSDGHKSVL
351 DKTIINLDDR TQVAYGSKNE IIRFEETLYG TSRLKNVPIG VTA

```

Matched peptides information:

| Start - End | Observed  | Mr(expt)  | Mr(calc)  | ppm | Miss | Sequence                               |
|-------------|-----------|-----------|-----------|-----|------|----------------------------------------|
| 95 - 105    | 1326.6365 | 1325.6292 | 1325.6142 | 11  | 0    | R.TLLMCMGEALR.T 2 Oxidation (M)        |
| 139 - 151   | 1607.8453 | 1606.8380 | 1606.8177 | 13  | 0    | K.LLFEALQYSHVCK.Y                      |
| 203 - 222   | 1948.1061 | 1947.0988 | 1946.9884 | 57  | 0    | K.LTGITGGDQVAAAMGIYGPR.T               |
| 203 - 222   | 1964.1334 | 1963.1261 | 1962.9833 | 73  | 0    | K.LTGITGGDQVAAAMGIYGPR.T Oxidation (M) |
| 223 - 230   | 894.4541  | 893.4468  | 893.5222  | -84 | 0    | R.TTYVLAVK.G                           |
| 231 - 245   | 1659.9355 | 1658.9282 | 1658.8304 | 59  | 0    | K.GFPGTHEFLLLDEGK.W                    |
| 231 - 250   | 2338.3466 | 2337.3393 | 2337.1906 | 64  | 1    | K.GFPGTHEFLLLDEGKWQHVK.E               |
| 260 - 267   | 921.4341  | 920.4268  | 920.4538  | -29 | 0    | K.MFSPGNLR.A                           |
| 260 - 267   | 937.4226  | 936.4153  | 936.4487  | -36 | 0    | K.MFSPGNLR.A Oxidation (M)             |
| 268 - 277   | 1161.5097 | 1160.5024 | 1160.4986 | 3   | 0    | R.ATFDNSEYSK.L                         |
| 278 - 284   | 913.4442  | 912.4369  | 912.4957  | -64 | 0    | K.LIDYYVK.E                            |
| 291 - 305   | 1649.9063 | 1648.8990 | 1648.8495 | 30  | 0    | R.YTGGMVPDVNQIIVK.E Oxidation (M)      |
| 308 - 319   | 1235.6544 | 1234.6471 | 1234.6558 | -7  | 0    | K.GIFTNVTSPTAK.A                       |
| 353 - 360   | 959.5035  | 958.4962  | 958.5083  | -13 | 0    | K.TIINLDDR.T                           |
| 369 - 383   | 1828.0366 | 1827.0293 | 1826.9162 | 62  | 1    | K.NEIRFEETLYGTSR.L                     |
| 374 - 383   | 1202.5993 | 1201.5920 | 1201.5615 | 25  | 0    | R.FEETLYGTSR.L                         |

Spot No.: **144**

Mascot score: **93** Sequence coverage %: **44**

NCBI accession No.: **gi| 21593565**

Matched peptides No.: **18**

Total peptides No.: **70**

Calculated Mr: **35982**

Calculated *pI*: **7.00**

### Annotated PMF spectra:

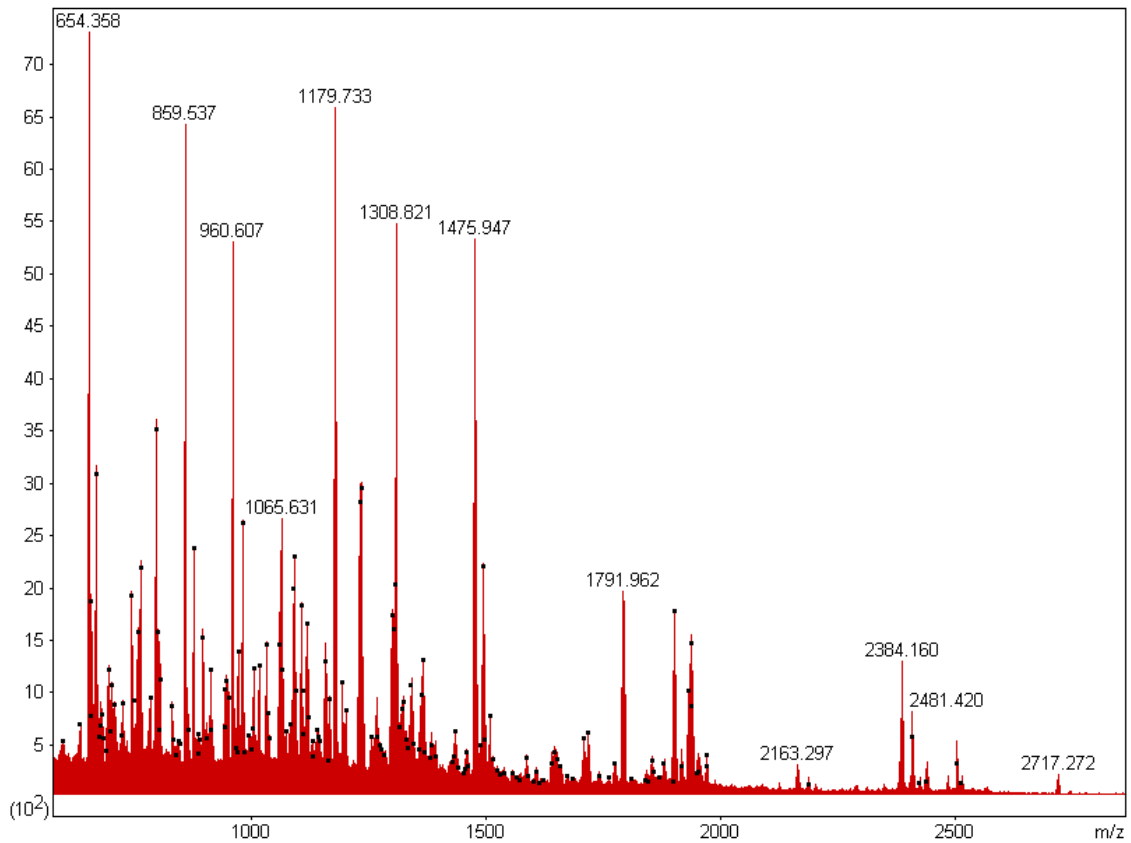

### Probability Based Mowse Score:

Protein score is  $-10 \cdot \log(P)$ , where  $P$  is the probability that the observed match is a random event. Protein scores greater than 72 are significant ( $p < 0.05$ ).

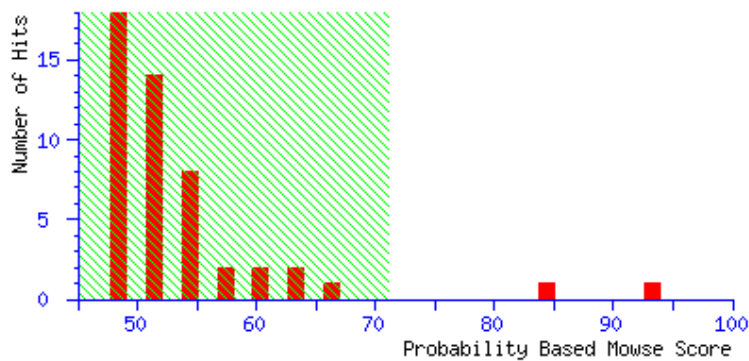



## Matched peptide sequences: shown in **Bold Red**

**1** MAKKPVRVLV TGAAGQIGYA LVPMIARGIM LGADQPVLH MLDIPFAAEA  
**51** LNGVK**MELVD AAFPLLK**GVV ATTDAVEACT GVNVAVMVGG FPRK**EGMERK**  
**101** **DVMSKNVSIY KSQASALEKH AAPNCKVLV ANPANTNALI LKEFAPSIPE**  
**151** **KNITCLTRLD HNRALGQVSE RLSVPVSDVK** NVIIWGNHSS TQYPDVNHAT  
**201** **VKTSSGEKPV RELVKNDEWL NGEFISTVQQ** RGAAIIKARK **LSSALSAASS**  
**251** **ACDHIR**DWVW GTPEGTFVSM GVYSDGSYNV PAGLIYSFPV TCRNGEWTIV  
**301** QGLPIDDASR **KKMDLTAEEL** **KEEKDLAYSC** LS

## Matched peptides information:

| Start - End | Observed  | Mr(expt)  | Mr(calc)  | ppm | Miss | Sequence                                |
|-------------|-----------|-----------|-----------|-----|------|-----------------------------------------|
| 56 - 67     | 1362.8580 | 1361.8507 | 1361.7265 | 91  | 0    | K.MELVDAA <b>FPLLK</b> .G Oxidation (M) |
| 95 - 100    | 749.4068  | 748.3996  | 748.3537  | 61  | 1    | K.E <b>GMERK</b> .D                     |
| 95 - 100    | 765.4020  | 764.3947  | 764.3487  | 60  | 1    | K.E <b>GMERK</b> .D Oxidation (M)       |
| 101 - 111   | 1283.7182 | 1282.7109 | 1282.6591 | 40  | 1    | K.D <b>VMSKNVSIYK</b> .S                |
| 106 - 111   | 723.4077  | 722.4004  | 722.3963  | 6   | 0    | K.N <b>VSIYK</b> .S                     |
| 106 - 119   | 1537.9035 | 1536.8962 | 1536.8147 | 53  | 1    | K.N <b>VSIYKSQASALEK</b> .H             |
| 120 - 126   | 797.4227  | 796.4155  | 796.3650  | 63  | 0    | K.H <b>AAPNCK</b> .V                    |
| 127 - 142   | 1650.1574 | 1649.1501 | 1648.9876 | 99  | 0    | K.VLVV <b>ANPANTNALILK</b> .E           |
| 143 - 151   | 1017.6117 | 1016.6044 | 1016.5178 | 85  | 0    | K.E <b>FAPSIPEK</b> .N                  |
| 152 - 158   | 877.5318  | 876.5245  | 876.4487  | 86  | 0    | K.N <b>ITCLTR</b> .L                    |
| 159 - 163   | 654.3581  | 653.3508  | 653.3245  | 40  | 0    | R.L <b>DHNR</b> .A                      |
| 164 - 171   | 859.5368  | 858.5296  | 858.4559  | 86  | 0    | R.A <b>LQVSE</b> .L                     |
| 172 - 180   | 943.5980  | 942.5908  | 942.5386  | 55  | 0    | R.L <b>SVPVSDVK</b> .N                  |
| 203 - 211   | 960.6072  | 959.6000  | 959.5036  | 100 | 0    | K.T <b>SSGEKPV</b> .E                   |
| 216 - 231   | 1936.1447 | 1935.1374 | 1934.9122 | 116 | 0    | K.N <b>DEWLNGEFISTVQQR</b> .G           |
| 240 - 256   | 1774.0826 | 1773.0753 | 1772.8839 | 108 | 1    | R.K <b>LSSALSAASSACDHIR</b> .D          |
| 241 - 256   | 1646.0110 | 1645.0037 | 1644.7889 | 131 | 0    | K.L <b>SSALSAASSACDHIR</b> .D           |
| 313 - 321   | 1065.6312 | 1064.6239 | 1064.5060 | 111 | 0    | K.M <b>DLTAEELK</b> .E Oxidation (M)    |

Spot No.: **145**

Mascot score: **81**    Sequence coverage %: **27**

NCBI accession No.: **gi| 303275508**

Matched peptides No.: **22**

Total peptides No.: **87**

Calculated Mr: **99906**

Calculated pI: **5.37**

### Annotated PMF spectra:

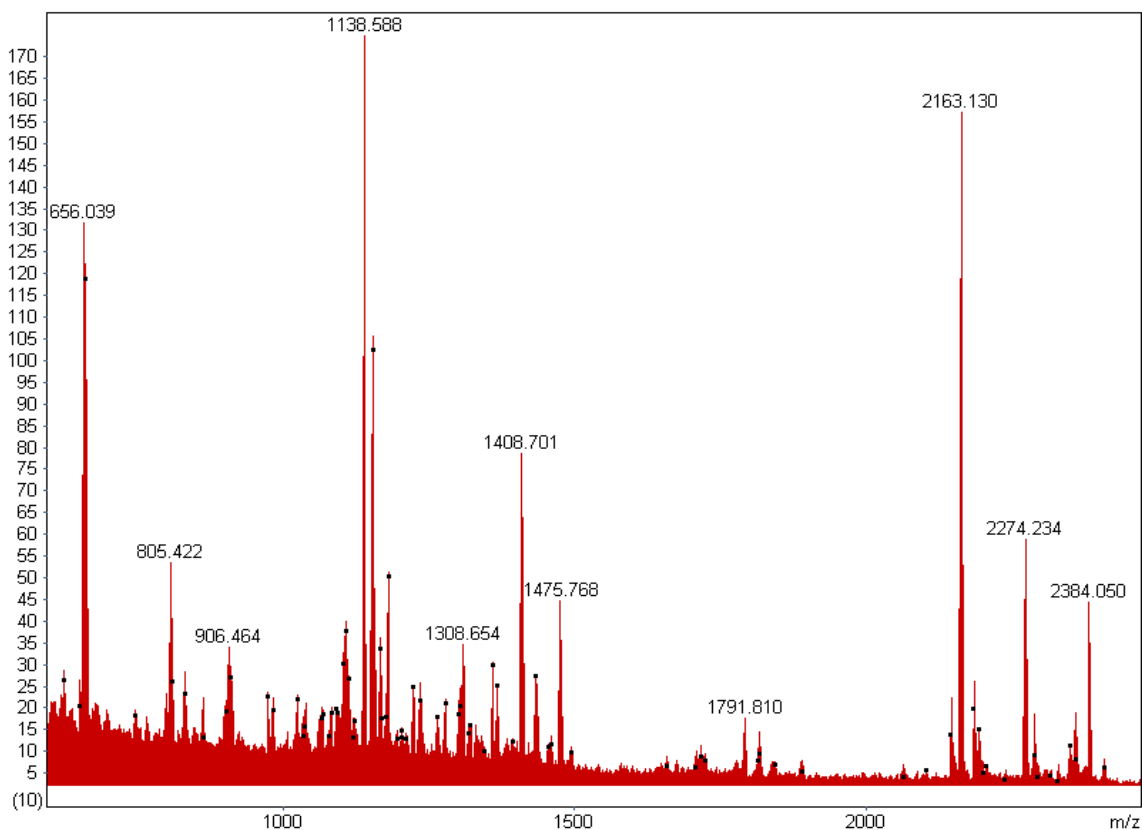

### Probability Based Mowse Score:

Protein score is  $-10 \cdot \log(P)$ , where P is the probability that the observed match is a random event. Protein scores greater than 72 are significant ( $p < 0.05$ ).

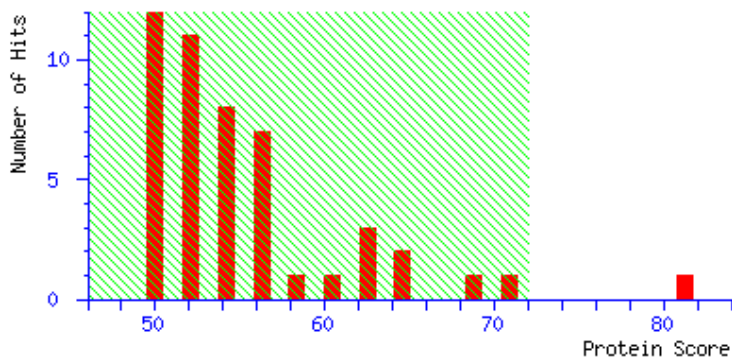

Matched peptide sequences: shown in **Bold Red**

1 **MPSFDKQVSR** PAAKAGAPAP ARARSGGPDF FVIAHVHKQS DAEAFFEARF  
 51 GLEPSSNDVR SPLRDGSNRA KPSTSERGGP  **TSAAGKKIAD** LQTKLAHAMA  
 101 AVQEGDAATE **QARIERERAA** **VAWADAMAAA** **DAARESAVAD** **AAVTRDGVQR**  
 151 **ALEREVSELR** AALAAAETMN ARAKAAEAAT HAAGAKAAKA KNDKLAARVA  
 201 LLTEARIGSS HRFYPYDPVRA VHAEAEDAER RASDASAASD ATRAELAETK  
 251 RAMEKIASEM **ETLKKAGAVA** **NEMLADAKGE** **LERARETSRD** **GEKLAAEAAA**  
 301 **EAAAAASASA** **TTIAELRAAL** ETTGGSRQRA MEELSRLRDD ATTAKEESER  
 351 **AKKTAEEDF** **LRAATETELA** KTRRDLDDAN ARASATESEL AKTRRDLDDA  
 401 NARASATESE **LAKTRRDLDD** **ANASASASAT** **TTRDEATREA** **RESAAREMEE**  
 451 **TRATLTARHD** AALAALAATH AATTKELEAR LDAARADASE AAARAEAFEA  
 501 EAAATTKELE ARLDAAKADA SEAAARAEAF EAEAAANAAA AVVVAPPPAAA  
 551 PPPPSEELDA LKAAHAAEMA KINEANDEIV AWAR**QAAKEE** **AEEALGANAR**  
 601 DALAKAARAE KALEDASLEH ASRVASLKQT FKEAMERKNE **ELKVALSAAR**  
 651 SSGADDVARA EAKVASATTE ARAKIAAAER **AAREAKAATD** **AEEAKAAATE**  
 701 KARDDAVECL NVAR**AECEAE** **VKAAELRAAN** VEYDLETLRN RLRQSENAGK  
 751 RALLELSDEL ASAERRAMEK VMKSEEAACK ADATNAQLAR **ELWACRQKME**  
 801 **TNEAELRRDL** ELSRKASDL **LREVNAARRR** EAMRGGGGGG DDASGAGRSA  
 851 **ADADAVVAEM** **QRELEAEIAA** SEAAAAASAK REGASRRKLA DVNTKLTEAE  
 901 HALHETKIAL MKSERRANDF ERDLEKETSK **SARLELACAK** GGVKLPK

Matched peptides information:

| Start - End | Observed  | Mr(expt)  | Mr(calc)  | ppm | Miss | Sequence                         |
|-------------|-----------|-----------|-----------|-----|------|----------------------------------|
| 1 - 10      | 1194.5838 | 1193.5765 | 1193.5863 | -8  | 1    | -.MPSFDKQVSR.P                   |
| 1 - 10      | 1210.5630 | 1209.5557 | 1209.5812 | -21 | 1    | -.MPSFDKQVSR.P Oxidation (M)     |
| 78 - 86     | 745.3693  | 744.3620  | 744.3766  | -20 | 0    | R.GGPTSAAGK.K                    |
| 117 - 134   | 1816.9436 | 1815.9363 | 1815.8686 | 37  | 1    | R.ERAAVAWADAMAAAADAAR.E          |
| 119 - 145   | 2602.3197 | 2601.3124 | 2601.2605 | 20  | 1    | R.AAVAWADAMAAAADAARESAVADA VTR.D |
| 151 - 160   | 1201.5879 | 1200.5806 | 1200.6462 | -55 | 1    | R.ALEREVSELR.A                   |
| 256 - 265   | 1165.5756 | 1164.5683 | 1164.6060 | -32 | 1    | K.IASEMETLKK.A Oxidation (M)     |
| 266 - 283   | 1844.8850 | 1843.8777 | 1843.9098 | -17 | 1    | K.AGAVANEMLADAKGELER.A           |
| 294 - 317   | 2201.0816 | 2200.0743 | 2200.1335 | -27 | 0    | K.LAAEAAEAAAAASASATTIAELR.A      |
| 353 - 362   | 1179.5992 | 1178.5919 | 1178.5931 | -1  | 1    | K.KTAEEDFLR.A                    |
| 404 - 415   | 1263.6359 | 1262.6286 | 1262.6466 | -14 | 1    | R.ASATESELAKTR.R                 |
| 417 - 438   | 2239.1649 | 2238.1576 | 2237.9996 | 71  | 1    | R.DLDDANASASASATTTTRDEATR.E      |
| 442 - 452   | 1308.6535 | 1307.6462 | 1307.5775 | 53  | 1    | R.ESAAREMEETR.A                  |
| 585 - 600   | 1657.8264 | 1656.8191 | 1656.8067 | 8   | 1    | R.QAAKEEAEALGANAR.D              |
| 639 - 650   | 1300.6004 | 1299.5931 | 1299.7146 | -93 | 1    | K.NEELKVALSAAR.S                 |
| 684 - 695   | 1175.5387 | 1174.5314 | 1174.5829 | -44 | 1    | R.EAKAATDAAEAK.A                 |
| 715 - 727   | 1475.7676 | 1474.7603 | 1474.7085 | 35  | 1    | R.AECEAEVKAAELR.A                |
| 791 - 798   | 1090.5376 | 1089.5303 | 1089.5389 | -8  | 1    | R.ELWACRQK.M                     |
| 799 - 807   | 1092.5169 | 1091.5096 | 1091.4917 | 16  | 0    | K.METNEAELR.R                    |
| 823 - 828   | 659.3862  | 658.3789  | 658.3398  | 59  | 0    | R.EVNAAR.R                       |
| 849 - 862   | 1433.7253 | 1432.7180 | 1432.6616 | 39  | 0    | R.SAADADAVVAEMQR.E               |
| 931 - 940   | 1118.5197 | 1117.5124 | 1117.5913 | -71 | 1    | K.SARLELACAK.G                   |

Spot No.: **146**

Mascot score: **85**

Sequence coverage %: **22**

NCBI accession No.: **gi| 168030082**

Matched peptides No.: **12**

Total peptides No.: **26**

Calculated Mr: **43708**

Calculated pI: **9.82**

### Annotated PMF spectra:

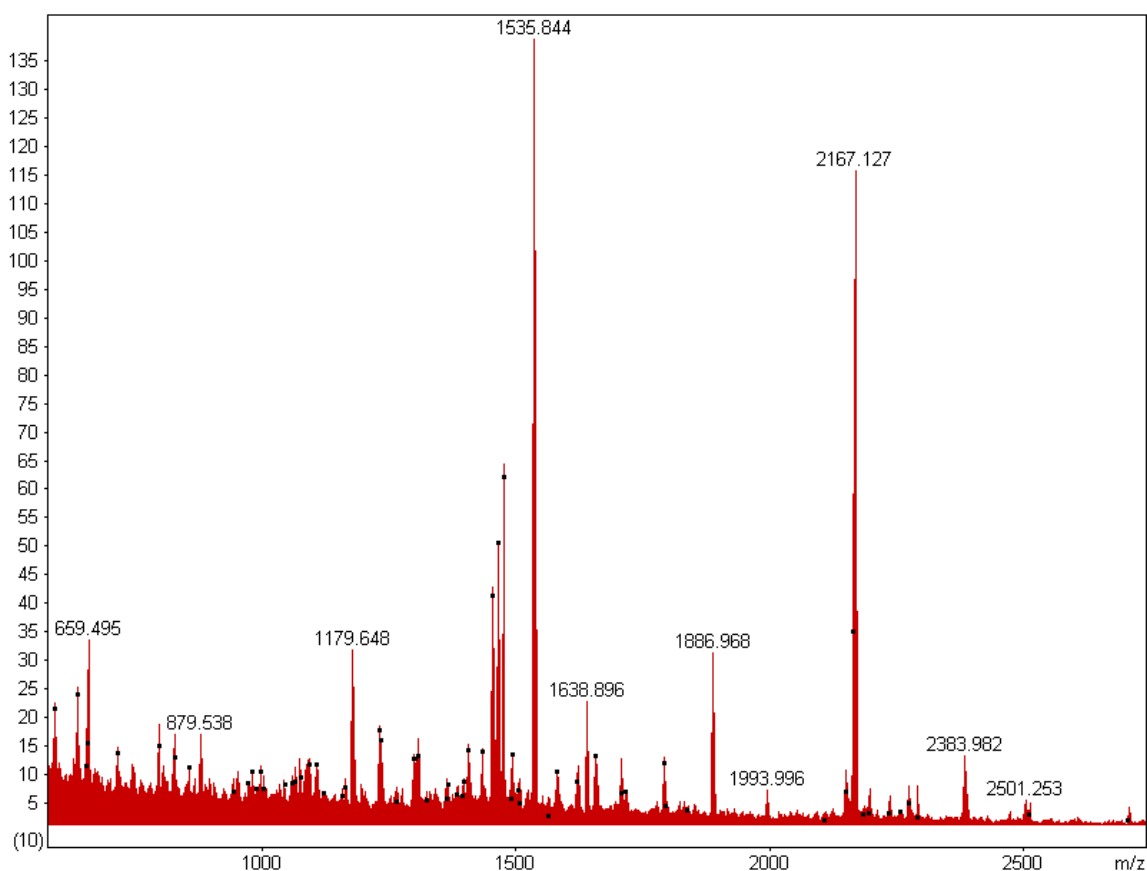

### Probability Based Mowse Score:

Protein score is  $-10 \cdot \log(P)$ , where P is the probability that the observed match is a random event. Protein scores greater than 72 are significant ( $p < 0.05$ ).

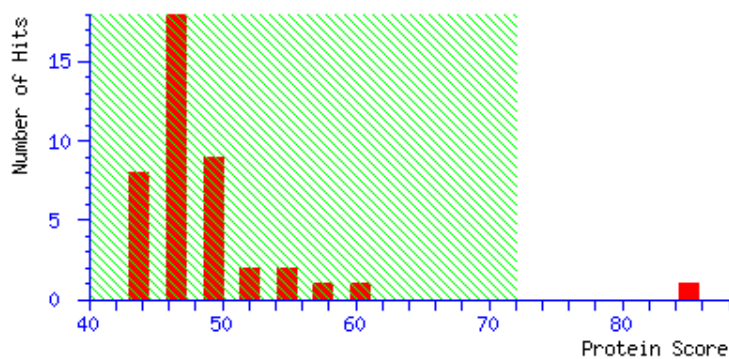

Matched peptide sequences: shown in **Bold Red**

```

1  MMEADVRRNN LLKEKVAVLE FKINKLGIAG RAYYEASKIK LRRNRYLIRA
51 ARTQNMLLHS ALFILEQKEM VSRKEASNLI GIRKQASDLR IKFDSLLRKKS
101 ITNQHILAKQ ITDTRATEIQ CADVLDPNTP PLITIRWLDI RLEAIFRTK
151 NTHLESLTNI IALKNNHIMQ LKMVMCDGIK SRDQAKAELE DLLSTLFPGG
201 RPVGMSKAEQ IKLNGLIVNL KEVMEVDTMR AMYQQLLFQQ KQILYLEQVK
251 AELILTLQKL RNEAPIPATH KRRSTFRLEE VGGIAASVKE SMQRLTVQTA
301 QKDTFPELL VEGTHKLISL IHQRTADMEE METNAVPEKL VLAETESKLV
351 FLLKGLDRKV KFLESMKAKQ IAKAVKPSTS MG

```

Matched peptides information:

| Start - End | Observed  | Mr (expt) | Mr (calc) | ppm  | Miss | Sequence                                 |
|-------------|-----------|-----------|-----------|------|------|------------------------------------------|
| 1 - 7       | 851.5259  | 850.5186  | 850.3677  | 177  | 0    | -.MMEADVRR.R                             |
| 9 - 13      | 601.3595  | 600.3522  | 600.3595  | -12  | 0    | R.NNLLK.E                                |
| 16 - 22     | 805.5194  | 804.5121  | 804.4745  | 47   | 0    | K.VAVLEFK.I                              |
| 93 - 97     | 637.4023  | 636.3950  | 636.3231  | 113  | 0    | K.FDSL.R.K                               |
| 149 - 164   | 1796.0223 | 1795.0150 | 1795.0203 | -3   | 1    | K.TKNTHLESLTNII <b>ALK</b> .N            |
| 202 - 212   | 1203.7613 | 1202.7540 | 1202.6329 | 101  | 1    | R.PVGM <b>SKAEQ</b> IK.L Oxidation (M)   |
| 251 - 259   | 1028.4995 | 1027.4922 | 1027.6277 | -132 | 0    | K.AELILTLQK.L                            |
| 290 - 294   | 650.3183  | 649.3110  | 649.2853  | 40   | 0    | K.ESMQR.L                                |
| 290 - 302   | 1535.8972 | 1534.8899 | 1534.7773 | 73   | 1    | K.ESMQRLTVQ <b>TAQK</b> .D Oxidation (M) |
| 295 - 302   | 888.5193  | 887.5121  | 887.5076  | 5    | 0    | R.LTVQ <b>TAQK</b> .D                    |
| 360 - 367   | 997.5718  | 996.5645  | 996.5314  | 33   | 1    | K.VK <b>FLES</b> MK.A Oxidation (M)      |
| 368 - 373   | 658.4631  | 657.4558  | 657.4173  | 59   | 1    | K.AKQ <b>IAK</b> .A                      |

Spot No.: **147**

Mascot score: **89** Sequence coverage %: **25**

NCBI accession No.: **gi| 15223186**

Matched peptides No.: **14**

Total peptides No.: **58**

Calculated Mr: **53980**

Calculated pI: **6.21**

### Annotated PMF spectra:

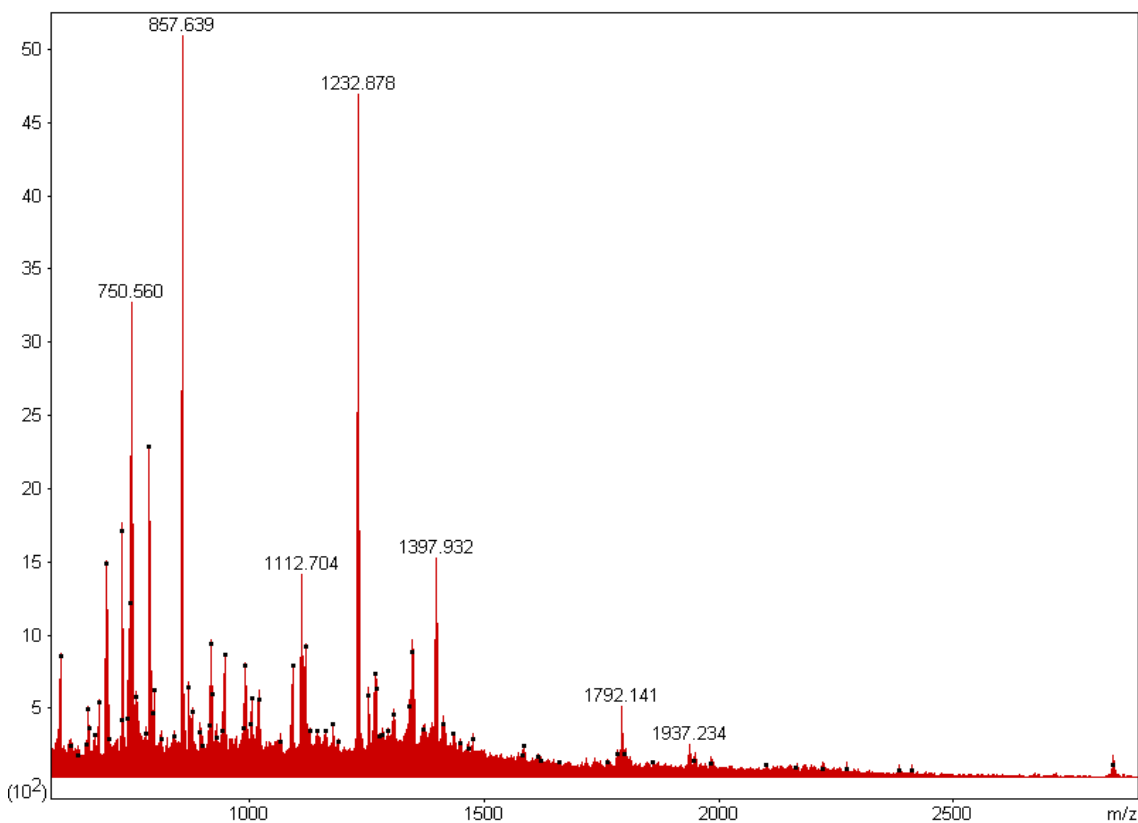

### Probability Based Mowse Score:

Protein score is  $-10 \cdot \log(P)$ , where P is the probability that the observed match is a random event. Protein scores greater than 72 are significant ( $p < 0.05$ ).

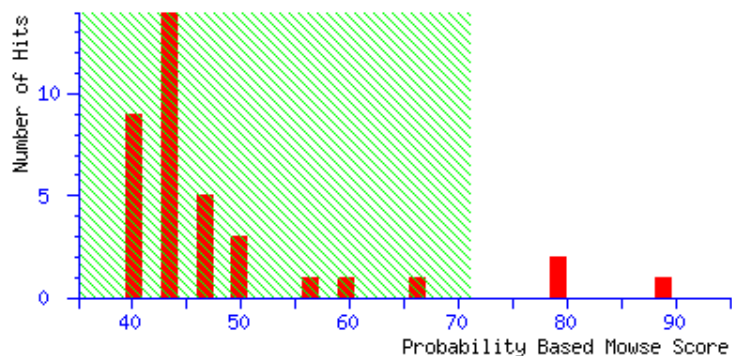

## Matched peptide sequences: shown in **Bold Red**

1 MSLKALDYES LNENVKNCQY AVRGELYLR SELQKEGKKI IFTNVGNPHA  
 51 LGQKPLTFPR QVVSQCQAPF LLDDPNVGM I FPADAIARAK HYLSTSGGL  
 101 GAYSDSRGLP GVRKEVAEFI ERRDGYPSDP ELIFLTDGAS KGVMQILNCV  
 151 IRGQKDGILV PVPQYPLYS A TISLLGGTLV PYYLEESENU GLDVMNLRQS  
 201 VAQARSQGIT VRAMVIINPG NPTGQCLSEA NIREILRFCC DERLVLLGDE  
 251 VYQQNIYQDE RPFISSKKVL MDMGAPISKE VQLISFHTVS KGYWGECCQR  
 301 GGYFEMTNIP PRTVEEIIYKV ASIALSPNVS AQIFMGLMVS PPKPGDISYD  
 351 QFVRESKGI L ESLRRRARM TDGFNSCKNV VCNFTEGAMY SFPQIKLPSK  
 401 AIQAAKQAGK VPDVVFYCLKL LEATGISTVP GSGFGQKEGV FHLRTTILPA  
 451 EEEMPEIMDS FKKFNDEFMS QYADNFGYSR M

## Matched peptides information:

| Start - End | Observed  | Mr(expt)  | Mr(calc)  | ppm  | Miss | Sequence                                |
|-------------|-----------|-----------|-----------|------|------|-----------------------------------------|
| 24 - 29     | 750.5604  | 749.5531  | 749.4072  | 195  | 0    | R.GELYLR.A                              |
| 89 - 107    | 1983.2932 | 1982.2859 | 1981.9857 | 151  | 1    | R.AKHYSLSGGLGAYSDSR.G                   |
| 91 - 107    | 1784.1868 | 1783.1795 | 1782.8537 | 183  | 0    | K.HYLSLSGGLGAYSDSR.G                    |
| 108 - 113   | 598.4600  | 597.4528  | 597.3598  | 156  | 0    | R.GLPGVR.K                              |
| 114 - 122   | 1120.8152 | 1119.8079 | 1119.5924 | 193  | 1    | R.KEVAEFIER.R                           |
| 115 - 122   | 992.7129  | 991.7057  | 991.4974  | 210  | 0    | K.EVAEFIER.R                            |
| 199 - 205   | 759.5446  | 758.5374  | 758.4035  | 177  | 0    | R.QSVAQAR.S                             |
| 213 - 233   | 2271.4941 | 2270.4868 | 2270.1147 | 164  | 0    | R.AMVIINPGNPTGQCLSEANIR.E Oxidation (M) |
| 292 - 300   | 1112.7039 | 1111.6966 | 1111.4505 | 121  | 0    | K.GYWGECCQR.G                           |
| 301 - 312   | 1397.9321 | 1396.9248 | 1396.6445 | 191  | 0    | R.GGYFEMTNIPPR.T Oxidation (M)          |
| 358 - 364   | 787.6207  | 786.6134  | 786.4599  | 195  | 0    | K.GILESLR.R                             |
| 358 - 365   | 943.6984  | 942.6911  | 942.5610  | 138  | 1    | K.GILESLRR.R                            |
| 438 - 444   | 857.6390  | 856.6317  | 856.4555  | 106  | 0    | K.EGVFHLR.T                             |
| 464 - 481   | 2221.4137 | 2220.4064 | 2220.8881 | -117 | 1    | K.FNDEFMSQYADNFGYSR.-                   |

Spot No.: **148**

Mascot score: **85**    Sequence coverage %: **38**

NCBI accession No.: **gi| 15240013**

Matched peptides No.: **12**

Total peptides No.: **106**

Calculated Mr: **35349**

Calculated pI: **5.55**

### Annotated PMF spectra:

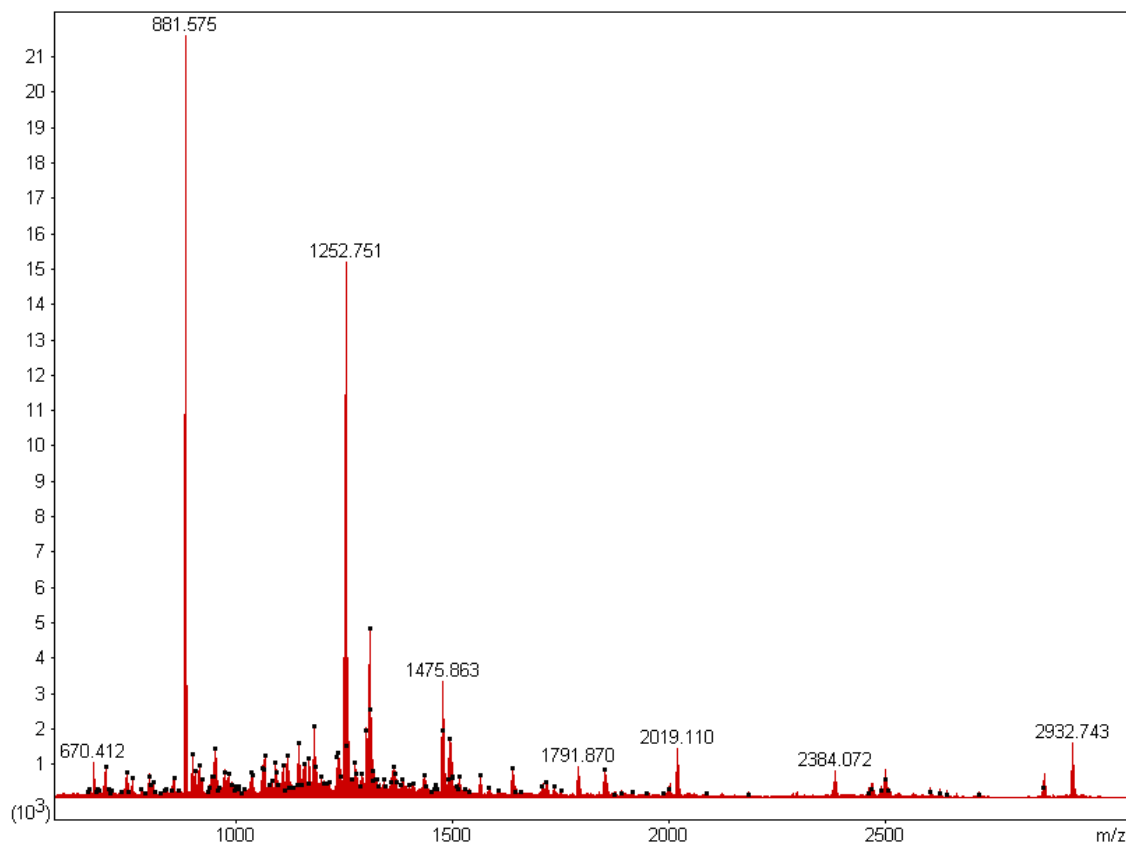

### Probability Based Mowse Score:

Protein score is  $-10 \cdot \log(P)$ , where P is the probability that the observed match is a random event. Protein scores greater than 72 are significant ( $p < 0.05$ ).

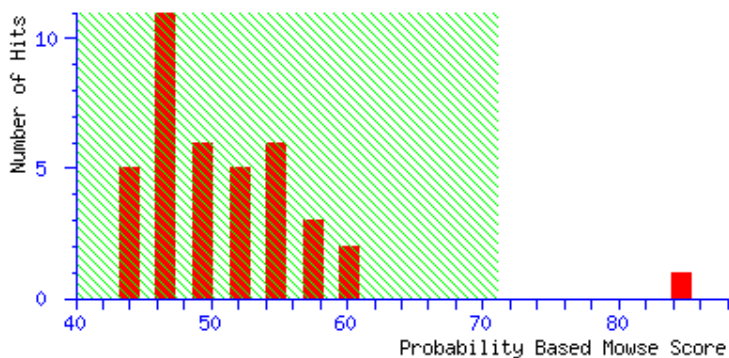



Matched peptide sequences: shown in **Bold Red**

**1** MAASLQSTAT FLQSAKIATA PSRGSSHLRS TQAVGKSFGL ETSSAR**LTCS**  
**51** **FQSDFK**DFTG KCSDAVKIAG FALATSALVV SGASAEGAPK **RLTYDEIQSK**  
**101** TYMEVKGTGT ANQCPTIDGG SETFSFKPGK YAGK**KCFEP** **TSFTVK**ADSV  
**151** SK**NAPPEFQN** **TKLM**TRLTYT LDEIEGPFV ASDGSVNFKE **EDGIDYAAVT**  
**201** **VQLP**GGERP **FLFTVK**QLDA SGKPDSTGK **FLVPSYRGSS** **FLDPKGRGGS**  
**251** **TGYD**NAVALP **AGGR**GDEEEL VKENVKNTAA SVGEITLKVT **KSKPETGEVI**  
**301** **GVFESLQPSD** **TDLGAK**VPKD VKIQGVWYGO LE

Matched peptides information:

| Start - End | Observed  | Mr(expt)  | Mr(calc)  | ppm | Miss | Sequence                                 |
|-------------|-----------|-----------|-----------|-----|------|------------------------------------------|
| 47 - 56     | 1232.6664 | 1231.6591 | 1231.5543 | 85  | 0    | R.LTCSFQSDFK.D                           |
| 91 - 100    | 1252.7507 | 1251.7434 | 1251.6459 | 78  | 1    | K.RLTYDEIQSK.T                           |
| 135 - 146   | 1490.8452 | 1489.8379 | 1489.7276 | 74  | 1    | K.KCFEPTSFTVK.A                          |
| 136 - 146   | 1362.7391 | 1361.7318 | 1361.6326 | 73  | 0    | K.FCFEPTSFTVK.A                          |
| 153 - 162   | 1145.6255 | 1144.6182 | 1144.5513 | 58  | 0    | K.NAPPEFQNTK.L                           |
| 190 - 208   | 2019.1101 | 2018.1028 | 2017.9593 | 71  | 0    | K.EEDGIDYAAVTVQLPgger.V                  |
| 209 - 216   | 950.6258  | 949.6185  | 949.5637  | 58  | 0    | R.VPFLFTVK.Q                             |
| 231 - 237   | 881.5753  | 880.5681  | 880.4807  | 99  | 0    | K.FLVPSYR.G                              |
| 238 - 245   | 850.4990  | 849.4917  | 849.4232  | 81  | 0    | R.GSSFLDPK.G                             |
| 248 - 264   | 1562.8869 | 1561.8796 | 1561.7485 | 84  | 0    | R.GGSTGYDNAVALPAGGR.G                    |
| 289 - 316   | 2932.7428 | 2931.7355 | 2931.5077 | 78  | 1    | K.VTKSKPETGEVIGVFESLQPSD <b>TDLGAK.V</b> |
| 292 - 316   | 2604.5315 | 2603.5242 | 2603.2966 | 87  | 0    | K.SKPETGEVIGVFESLQPSD <b>TDLGAK.V</b>    |

Spot No.: **149**

Mascot score: **96**    Sequence coverage %: **58**

NCBI accession No.: **gi| 312282325**

Matched peptides No.: **15**

Total peptides No.: **78**

Calculated Mr: **35258**

Calculated pI: **5.92**

### Annotated PMF spectra:

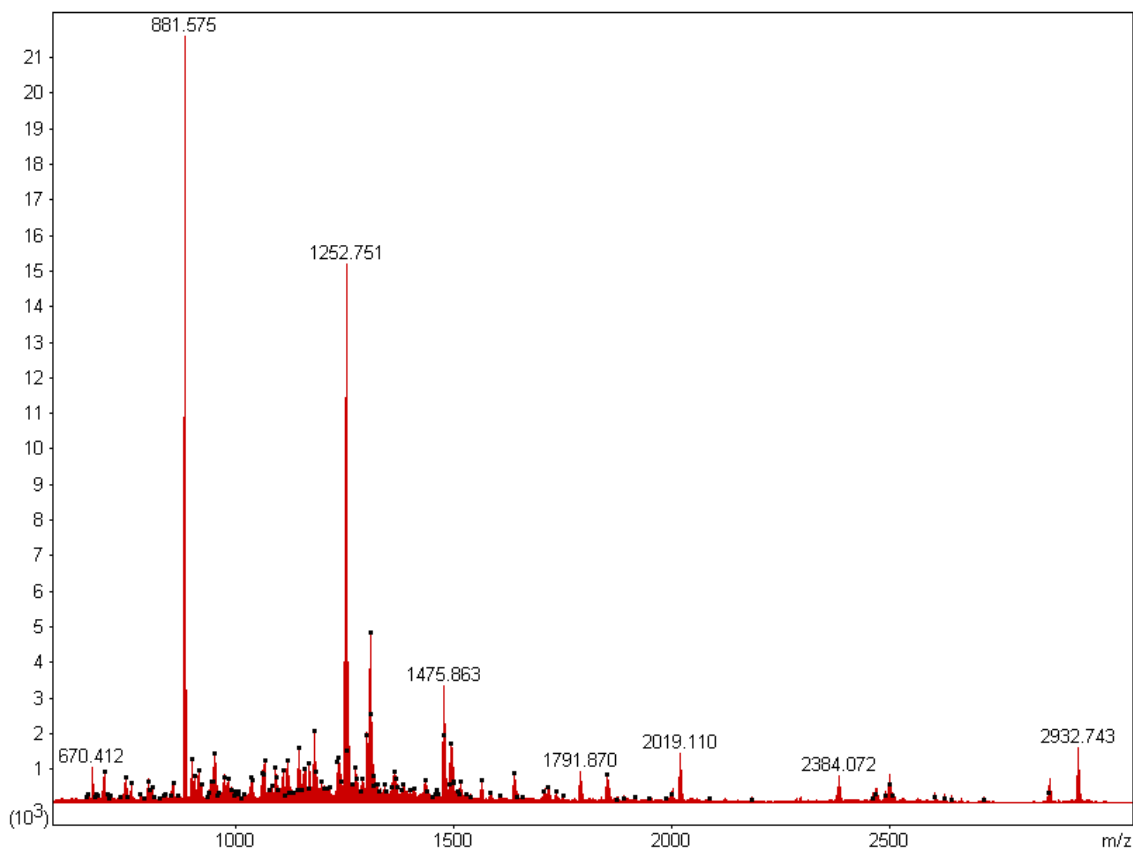

### Probability Based Mowse Score:

Protein score is  $-10 \cdot \log(P)$ , where P is the probability that the observed match is a random event. Protein scores greater than 72 are significant ( $p < 0.05$ ).

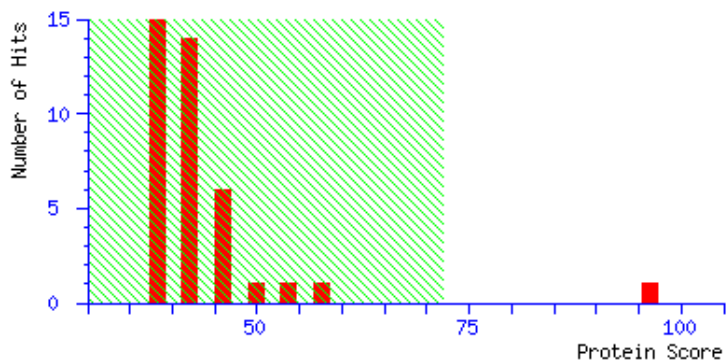

Matched peptide sequences: shown in **Bold Red**

```

1 MATSLQAATT FLQPAKIAAS PSRSVHLRSN QTVAKSFGL E SSPARLTCSL
51 HSDFKDFAGK CSDAAKVAGF ALATSALVVS GASAEGAPKR LYDEIQSKT
101 YMEVKGTGTA NQCPTIDGGS EAFSFKPGKY TGKKCFEPT SFTVKADSVS
151 KNAPPDFQNT KLMTRLTYTL DEIEGPFEVG SDGSVKFKEE DGIDYAAVTV
201 QLPGGERVPF LFTVKQLEAS GKPDSFSGKF LVPSYRGSSF LDPKRGGST
251 GYDNAVALPA GRGDEEELS KENVKNIAAS VGEILKITK SKPETGEVIG
301 VFESLQPSDT DLGAKVPKDV KIQGVWYGQL E

```

Matched peptides information:

| Start - End | Observed  | Mr(expt)  | Mr(calc)  | ppm | Miss | Sequence                      |
|-------------|-----------|-----------|-----------|-----|------|-------------------------------|
| 24 - 35     | 1339.7411 | 1338.7338 | 1338.7368 | -2  | 1    | R.SVHLRSNQTVAK.S              |
| 56 - 66     | 1169.6141 | 1168.6068 | 1168.5183 | 76  | 1    | K.DFAGKCSDAAK.V               |
| 90 - 99     | 1252.7736 | 1251.7663 | 1251.6459 | 96  | 1    | K.RLYDEIQSK.T                 |
| 91 - 99     | 1096.6268 | 1095.6195 | 1095.5448 | 68  | 0    | R.LTYDEIQSK.T                 |
| 106 - 129   | 2427.2785 | 2426.2712 | 2426.1173 | 63  | 1    | K.GTGTANQCPTIDGGSEAFSFKPGK.Y  |
| 134 - 145   | 1490.8477 | 1489.8404 | 1489.7276 | 76  | 1    | K.KCFEPTSFTVK.A               |
| 135 - 145   | 1362.7298 | 1361.7225 | 1361.6326 | 66  | 0    | K.FCFEPTSFTVK.A               |
| 152 - 161   | 1131.6279 | 1130.6206 | 1130.5356 | 75  | 0    | K.NAPPDFQNTK.L                |
| 166 - 186   | 2256.1854 | 2255.1781 | 2255.0845 | 42  | 0    | R.LTYTLDEIEGPFVEGSDGSVK.F     |
| 187 - 207   | 2294.2667 | 2293.2594 | 2293.1226 | 60  | 1    | K.FKEEDGIDYAAVTVQLPgger.V     |
| 208 - 215   | 950.6444  | 949.6372  | 949.5637  | 77  | 0    | R.VPFLFTVK.Q                  |
| 216 - 229   | 1450.8250 | 1449.8177 | 1449.7100 | 74  | 1    | K.QLEASGKPSFSGK.F             |
| 230 - 236   | 881.6103  | 880.6031  | 880.4807  | 139 | 0    | K.FLVPSYR.G                   |
| 247 - 263   | 1562.8903 | 1561.8830 | 1561.7485 | 86  | 0    | R.GGSTGYDNAVALPAGGR.G         |
| 291 - 315   | 2604.4668 | 2603.4595 | 2603.2966 | 63  | 1    | K.SKPETGEVIGVFESLQPSDIDLGAK.V |

Spot No.: **150**

Mascot score: **99**

Sequence coverage %: **47**

NCBI accession No.: **gi| 30690323**

Matched peptides No.: **21**

Total peptides No.: **129**

Calculated Mr: **39646**

Calculated pI: **9.44**

### Annotated PMF spectra:

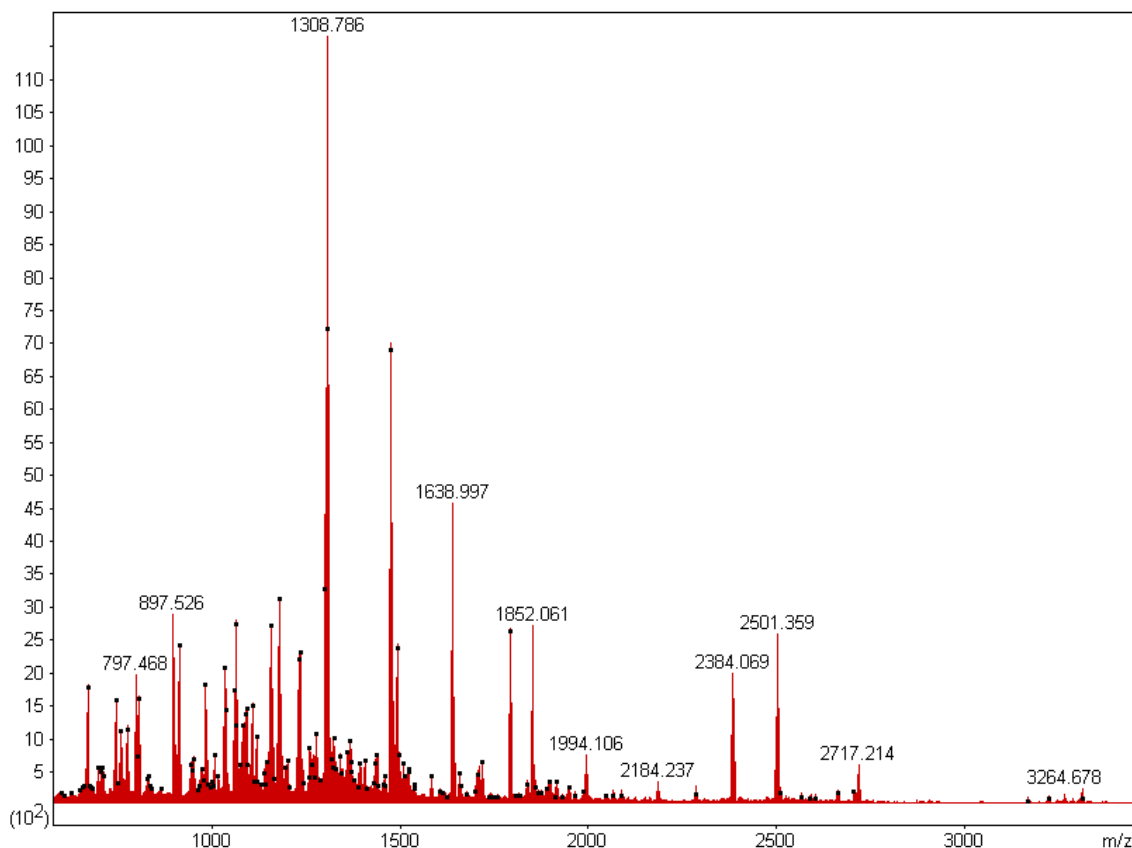

### Probability Based Mowse Score:

Protein score is  $-10 \cdot \log(P)$ , where P is the probability that the observed match is a random event. Protein scores greater than 72 are significant ( $p < 0.05$ ).

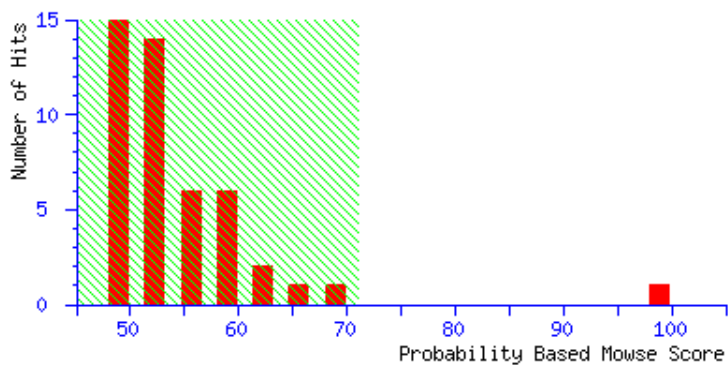

## Matched peptide sequences: shown in **Bold Red**

**1 MVEEAQLDPK SKSIPNENLK** FGERALSAGG AAFISAVIVN PLDVVKTRL**Q**  
**51 AQAAGVPYQG SCRLGCFDTN** STLVHDLRS**N** **SAPGMCRITG** SASVCSNDQY  
**101 KGTLDVIFYKI IRQEGFSRLW** RGTNASLTLA IPTVGIYMPC YDYFR**NIMEE**  
**151 FTTEKSPSLT VYVPLVAGTI** AR**SLACISCY** **PVELARTRMQ** **AFKGTQRNVK**  
**201 LPGVWKTLDV VVNPVKGSNN** GYR**MLWTGLG** **AQLARDVPFS** **AICWSILEPT**  
**251 RRSIQSAMGE EPRAGSIIGA** NFAAGFVAGA VAAAAATCPLD VAKTRR**QIEK**  
**301 NTDRAMTMTT RQTLAEIWRD** **GGMRGMFSGA** **GARVGRAGPS** VAIVVSFYEV  
**351 VKYGLHNFHQ Q**

## Matched peptides information:

| Start - End | Observed  | Mr(expt)  | Mr(calc)  | ppm | Miss | Sequence                        |
|-------------|-----------|-----------|-----------|-----|------|---------------------------------|
| 1 - 12      | 1390.7680 | 1389.7607 | 1389.6810 | 57  | 1    | -MVEEAQLDPKSK.S Oxidation (M)   |
| 11 - 20     | 1129.6146 | 1128.6073 | 1128.6138 | -6  | 1    | K.SKSIPNENLK.F                  |
| 13 - 20     | 914.6449  | 913.6376  | 913.4869  | 165 | 0    | K.SIPNENLK.F                    |
| 49 - 63     | 1605.8662 | 1604.8589 | 1604.7729 | 54  | 0    | R.LQAQAAGVPYQGSCL               |
| 79 - 87     | 995.5725  | 994.5652  | 994.3960  | 170 | 0    | R.SNSAPGMCR.I Oxidation (M)     |
| 146 - 155   | 1241.6719 | 1240.6646 | 1240.5645 | 81  | 0    | R.NIMEEFTTEK.S                  |
| 146 - 155   | 1257.7319 | 1256.7246 | 1256.5594 | 131 | 0    | R.NIMEEFTTEK.S Oxidation (M)    |
| 173 - 186   | 1638.9972 | 1637.9899 | 1637.7905 | 122 | 0    | R.SLACISCYPVELAR.T              |
| 187 - 193   | 897.5256  | 896.5184  | 896.4538  | 72  | 1    | R.TRMQAFK.G Oxidation (M)       |
| 189 - 197   | 1082.6900 | 1081.6827 | 1081.5339 | 138 | 1    | R.MQAFKGTQR.N Oxidation (M)     |
| 194 - 200   | 802.5461  | 801.5388  | 801.4457  | 116 | 1    | K.GTQRNVK.L                     |
| 224 - 235   | 1316.6883 | 1315.6810 | 1315.7071 | -20 | 0    | R.MLWTGLGAQLAR.D                |
| 236 - 251   | 1891.0719 | 1890.0646 | 1889.9346 | 69  | 0    | R.DVPFSAICWSILEPTR.R            |
| 253 - 263   | 1204.6890 | 1203.6817 | 1203.5554 | 105 | 0    | R.SIQSAMGEPR.A                  |
| 297 - 304   | 1003.6226 | 1002.6153 | 1002.5094 | 106 | 1    | R.QIEKNTDR.A                    |
| 301 - 311   | 1329.7661 | 1328.7588 | 1328.5813 | 134 | 1    | K.NTDRAMTMTTR.Q 2 Oxidation (M) |
| 305 - 311   | 827.5001  | 826.4929  | 826.3677  | 151 | 0    | R.AMTMTTR.Q Oxidation (M)       |
| 312 - 319   | 1016.6188 | 1015.6115 | 1015.5451 | 65  | 0    | R.QLAEIWR.D                     |
| 320 - 333   | 1369.7564 | 1368.7491 | 1368.6027 | 107 | 1    | R.DGGMRGMFSGAGAR.V              |
| 325 - 336   | 1165.6690 | 1164.6617 | 1164.5822 | 68  | 1    | R.GMFSGAGARVGR.A                |
| 353 - 361   | 1143.6539 | 1142.6466 | 1142.5257 | 106 | 0    | K.YGLHNFHQ.-                    |

Spot No.: **151**

Mascot score: **146**    Sequence coverage %: **54**

NCBI accession No.: **gi| 166359602**

Matched peptides No.: **20**

Total peptides No.: **132**

Calculated Mr: **24136**

Calculated pI: **6.17**

### Annotated PMF spectra:

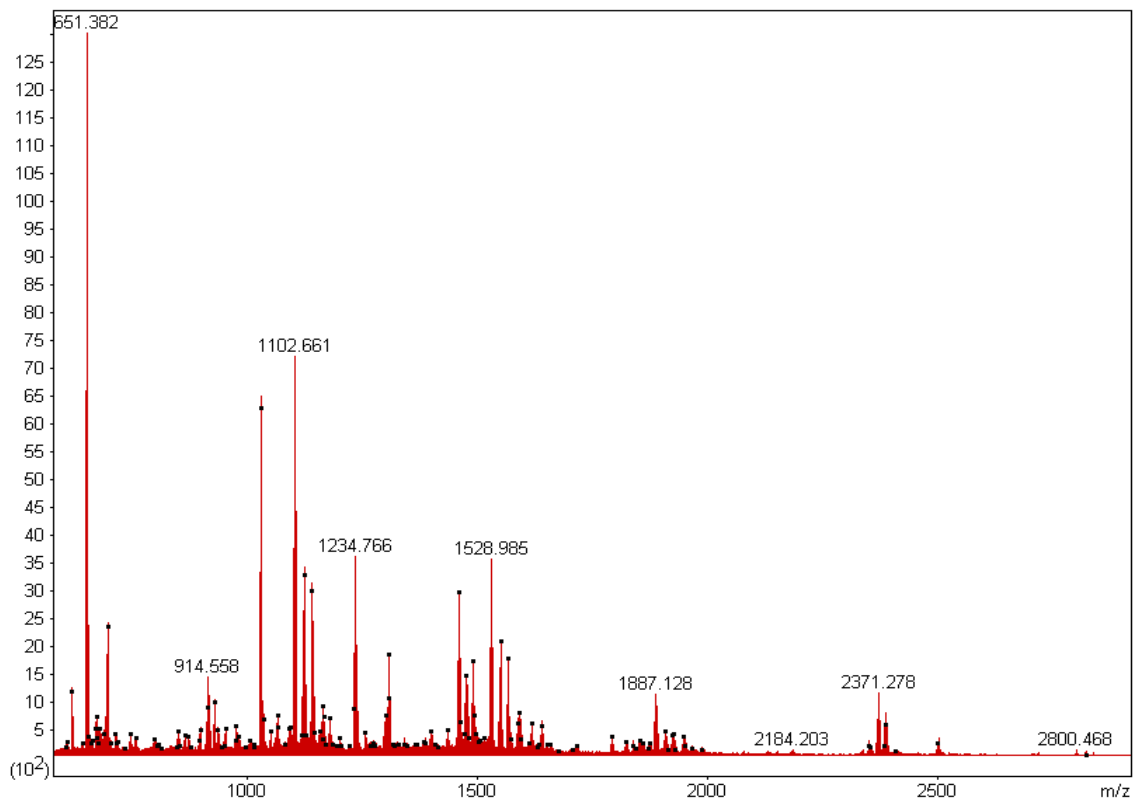

### Probability Based Mowse Score:

Protein score is  $-10 \cdot \log(P)$ , where P is the probability that the observed match is a random event. Protein scores greater than 72 are significant ( $p < 0.05$ ).

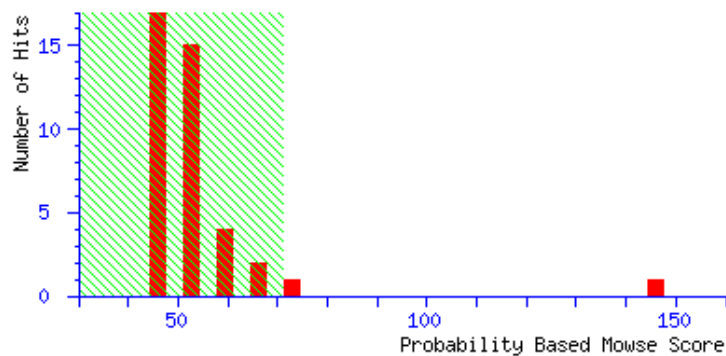

## Matched peptide sequences: shown in **Bold Red**

**1** MVLK**VYGP**H**F ASPKRALVTL VEKGVAFETI PVDLMKGEHK QPAYLALQPF**  
**51** **GTVP**AVVD**GD YKIFESRAVM RYVAEKYRSQ GPDLLGKTVE DRGQVEQWLD**  
**101** VEATTYHPPL LNLTLHVMFA SVMGFADQK **LIKESEEKLA AVLDVYEAHL**  
**151** **SK**SKYLAGDF VSLADLAHLP FTDYLVGPIG **KAYMIKDRKH** VSAWDDISS  
**201** RPAWKEVLEK YSLPA

## Matched peptides information:

| Start - End | Observed  | Mr(expt)  | Mr(calc)  | ppm | Miss | Sequence                                                 |
|-------------|-----------|-----------|-----------|-----|------|----------------------------------------------------------|
| 5 - 14      | 1102.6607 | 1101.6534 | 1101.5607 | 84  | 0    | K.VYGP <b>H</b> F <b>ASPK.R</b>                          |
| 15 - 23     | 1028.7354 | 1027.7281 | 1027.6390 | 87  | 1    | K.RALVTL <b>VEK.G</b>                                    |
| 16 - 23     | 872.5592  | 871.5519  | 871.5379  | 16  | 0    | R.ALVTL <b>VEK.G</b>                                     |
| 24 - 36     | 1435.8628 | 1434.8555 | 1434.7429 | 79  | 0    | K.GVAFETIPVDLMK <b>.G</b> Oxidation (M)                  |
| 24 - 40     | 1871.0620 | 1870.0547 | 1869.9659 | 48  | 1    | K.GVAFETIPVDLMK <b>GEHK.Q</b>                            |
| 24 - 40     | 1887.1275 | 1886.1202 | 1885.9608 | 85  | 1    | K.GVAFETIPVDLMK <b>GEHK.Q</b> Oxidation (M)              |
| 37 - 62     | 2800.4676 | 2799.4603 | 2799.4232 | 13  | 1    | K.GE <b>HK</b> QPAYLALQPF <b>GTVP</b> AVVD <b>GDYK.I</b> |
| 41 - 62     | 2349.3284 | 2348.3211 | 2348.2053 | 49  | 0    | K.QPAYLALQPF <b>GTVP</b> AVVD <b>GDYK.I</b>              |
| 63 - 67     | 651.3822  | 650.3749  | 650.3388  | 56  | 0    | K.IFESR <b>.A</b>                                        |
| 63 - 71     | 1124.6752 | 1123.6679 | 1123.5808 | 78  | 1    | K.IFESRA <b>VMR.Y</b> Oxidation (M)                      |
| 68 - 76     | 1066.6711 | 1065.6638 | 1065.5641 | 94  | 1    | R.A <b>VMRY</b> VAEK <b>.Y</b>                           |
| 68 - 76     | 1082.6550 | 1081.6477 | 1081.5590 | 82  | 1    | R.A <b>VMRY</b> VAEK <b>.Y</b> Oxidation (M)             |
| 72 - 76     | 609.3175  | 608.3102  | 608.3170  | -11 | 0    | R.Y <b>VAEK.Y</b>                                        |
| 72 - 78     | 928.5605  | 927.5532  | 927.4814  | 77  | 1    | R.Y <b>VAEKYR.S</b>                                      |
| 79 - 87     | 914.5583  | 913.5510  | 913.4869  | 70  | 0    | R.S <b>QGP</b> DLL <b>GK.T</b>                           |
| 88 - 92     | 619.3321  | 618.3248  | 618.2973  | 44  | 0    | K.T <b>VEDR.G</b>                                        |
| 131 - 138   | 975.5807  | 974.5734  | 974.5284  | 46  | 1    | K.L <b>IK</b> SEEK <b>.L</b>                             |
| 139 - 152   | 1528.9850 | 1527.9777 | 1527.8297 | 97  | 0    | K.L <b>AAV</b> LDVYEAHL <b>SK.S</b>                      |
| 182 - 186   | 641.3212  | 640.3139  | 640.3254  | -18 | 0    | K.A <b>YMIK.D</b> Oxidation (M)                          |
| 182 - 188   | 912.5058  | 911.4985  | 911.4535  | 49  | 1    | K.A <b>YMIKDR.K</b> Oxidation (M)                        |

Spot No.: **152**

Mascot score: **171**      Sequence coverage %: **39**

NCBI accession No.: **gi| 30959098**

Matched peptides No.: **25**      Total peptides No.: **108**

Calculated Mr: **49918**      Calculated pI: **6.12**

### Annotated PMF spectra:

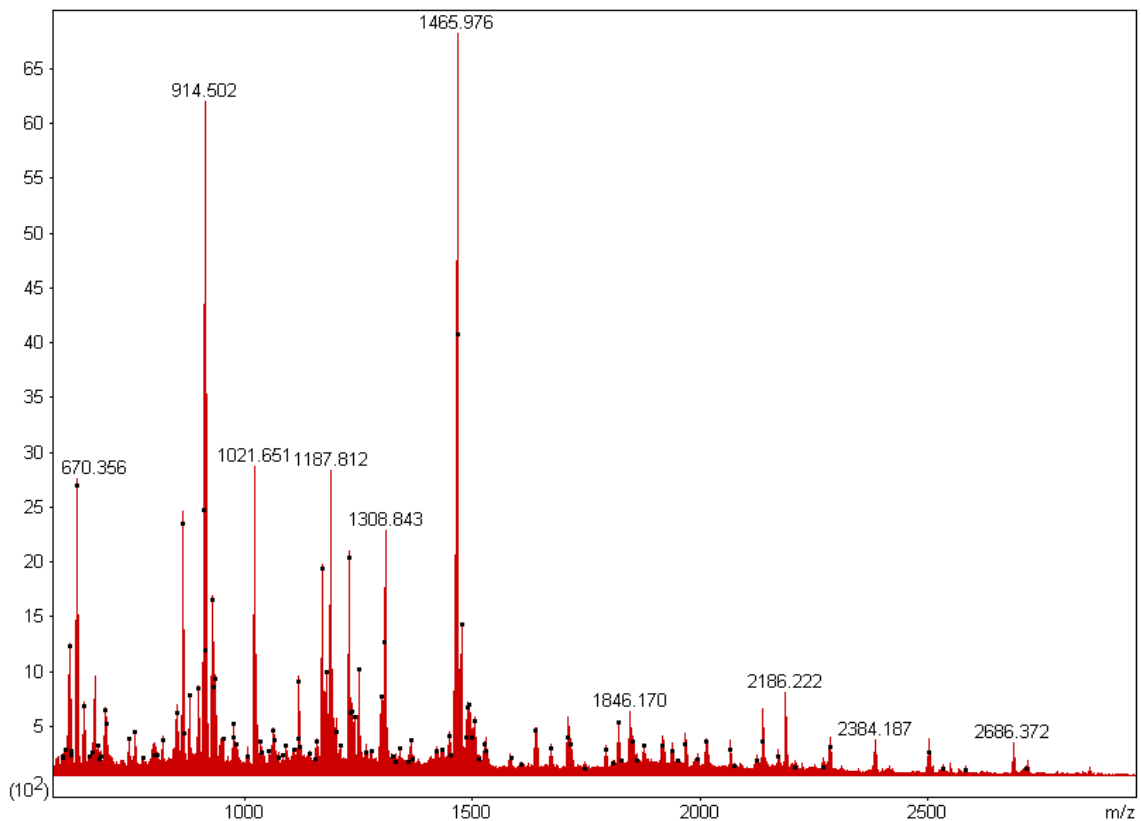

### Probability Based Mowse Score:

Protein score is  $-10 \cdot \log(P)$ , where P is the probability that the observed match is a random event. Protein scores greater than 72 are significant ( $p < 0.05$ ).

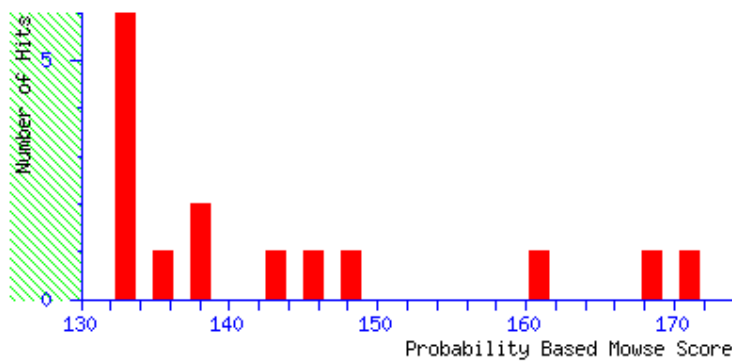



## Matched peptide sequences: shown in **Bold Red**

```

1  SVGFKAGVKE  YKLTYYTPEY  ETKDTDILAA  FRVTPQPGVP  PEEAGAAVAA
51 ESSTGTWTTV  WTDGLTSLDR  YKGRCYHIEP  VAGEENQYIA  YVAYPLDLFE
101 EGXVXXMFXX  IVGNVFGFKA  LAALRLEDLR  IPPAYTKTFQ  GPPHGIQVER
151 DKLNKYGRPL  LGCTIKPKLG  LSAKNYGRAV  YECLRGGLDF  TKDDENVNSQ
201 PFMRWRDRFL  FCAEALYKAQ  TETGEIKGHY  LNATAGTCEE  MIKRAVFARE
251 LGVPIVMHDY  LTGGFTANTS  LAHYCRDNGL  LLHIHRAMHA  VIDRQKNHGM
301 HRVVLAKALR  LSGGDHIHAG  TVVGKLEGDR  ESTLGFVDLL  RDDYIEKDRS
351 RGIFFTQDWV  SLPGVLPVAS  GGIHVWHMPA  LTEIFGDDSV  LQFGGGTLGH
401 PWGNAPGAVA  NRVALEACVQ  ARNEGRDLAV  EGNEIIREAS  KWSPELAAA

```

## Matched peptides information:

| Start - End | Observed  | Mr(expt)  | Mr(calc)  | ppm | Miss | Sequence                                       |
|-------------|-----------|-----------|-----------|-----|------|------------------------------------------------|
| 24 - 32     | 1021.6509 | 1020.6436 | 1020.5240 | 117 | 0    | K.DTDILAAFR.V                                  |
| 120 - 125   | 614.4258  | 613.4186  | 613.3911  | 45  | 0    | K.ALAALR.L                                     |
| 120 - 130   | 1240.8798 | 1239.8725 | 1239.7299 | 115 | 1    | K.ALAALRLEDLR.I                                |
| 126 - 130   | 645.3686  | 644.3614  | 644.3493  | 19  | 0    | R.LEDLR.I                                      |
| 138 - 150   | 1465.9758 | 1464.9685 | 1464.7474 | 151 | 0    | K.TFQGGPPHGIQVER.D                             |
| 138 - 152   | 1709.0891 | 1708.0818 | 1707.8693 | 124 | 1    | K.TFQGGPPHGIQVERDK.L                           |
| 179 - 185   | 910.5267  | 909.5195  | 909.4378  | 90  | 0    | R.AVYECLR.G                                    |
| 186 - 204   | 2170.2273 | 2169.2200 | 2168.9797 | 111 | 1    | R.GGLDFTKDDENVNSQP <b>PFMR.W</b>               |
| 186 - 204   | 2186.2217 | 2185.2144 | 2184.9746 | 110 | 1    | R.GGLDFTKDDENVNSQP <b>PFMR.W</b> Oxidation (M) |
| 205 - 208   | 632.3520  | 631.3447  | 631.3190  | 41  | 1    | R.WRDR.F                                       |
| 219 - 227   | 976.4622  | 975.4549  | 975.4873  | -33 | 0    | K.AQTETGEIK.G                                  |
| 228 - 244   | 1967.1442 | 1966.1369 | 1965.9037 | 119 | 1    | K.GHYLNATAGTCE <b>EMIKR.A</b> Oxidation (M)    |
| 277 - 286   | 1187.8122 | 1186.8049 | 1186.6571 | 125 | 0    | R.DNGLLLHHR.A                                  |
| 287 - 294   | 912.5449  | 911.5376  | 911.4647  | 80  | 0    | R.AMHAVIDR.Q                                   |
| 287 - 294   | 928.5407  | 927.5334  | 927.4596  | 80  | 0    | R.AMHAVIDR.Q Oxidation (M)                     |
| 295 - 303   | 1170.7653 | 1169.7580 | 1169.5512 | 177 | 1    | R.QKNHG <b>MFHFR.V</b> Oxidation (M)           |
| 297 - 303   | 898.5056  | 897.4984  | 897.4028  | 107 | 0    | K.NHG <b>MFHFR.V</b>                           |
| 297 - 303   | 914.5017  | 913.4945  | 913.3977  | 106 | 0    | K.NHG <b>MFHFR.V</b> Oxidation (M)             |
| 311 - 325   | 1447.9468 | 1446.9395 | 1446.7579 | 126 | 0    | R.LSGGDHIHAGTVVGK.L                            |
| 326 - 341   | 1820.1888 | 1819.1815 | 1818.9476 | 129 | 1    | K.LEGDRESTLGFVDLLR.D                           |
| 331 - 341   | 1249.8378 | 1248.8305 | 1248.6714 | 127 | 0    | R.ESLGFVDLLR.D                                 |
| 331 - 347   | 2013.2321 | 2012.2248 | 2012.0102 | 107 | 1    | R.ESLGFVDLLR <b>DDYIEK.D</b>                   |
| 342 - 349   | 1053.6126 | 1052.6053 | 1052.4774 | 122 | 1    | R.DDYIEKDR.S                                   |
| 413 - 422   | 1116.7105 | 1115.7032 | 1115.5757 | 114 | 0    | R.VALEACV <b>QAR.N</b>                         |
| 427 - 437   | 1228.8208 | 1227.8135 | 1227.6459 | 137 | 0    | R.DLAVEGNEIIR.E                                |

Spot No.: **153**

Mascot score: **101**

Sequence coverage %: **45**

NCBI accession No.: **gi| 15240599**

Matched peptides No.: **13**

Total peptides No.: **57**

Calculated Mr: **35262**

Calculated pI: **5.08**

### Annotated PMF spectra:

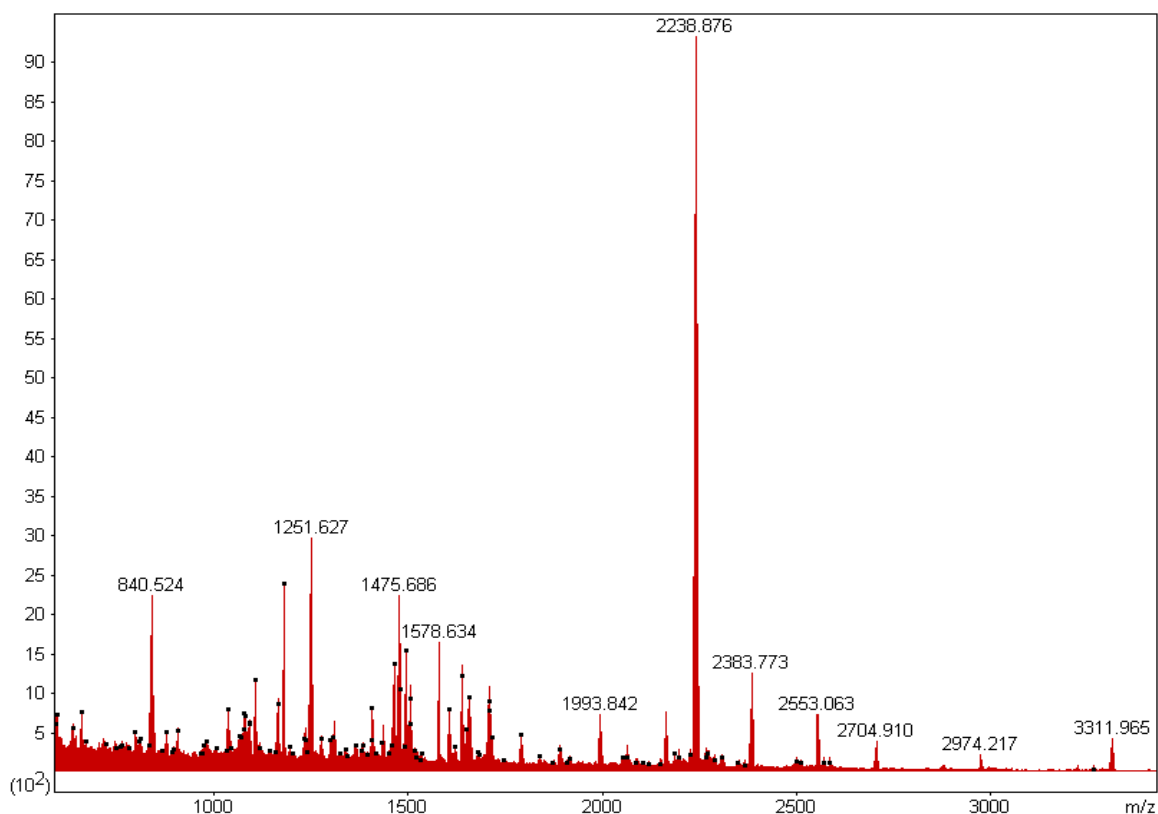

### Probability Based Mowse Score:

Protein score is  $-10 \cdot \log(P)$ , where P is the probability that the observed match is a random event. Protein scores greater than 72 are significant ( $p < 0.05$ ).

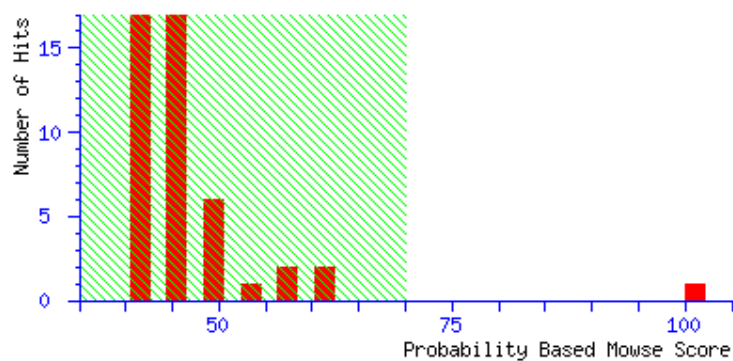

Matched peptide sequences: shown in **Bold Red**

**1 MGQDRGFGFP TQRLCSLSSL ALSHLGKQDL NLVSKTCGDT TDMFSTRGSY**  
**51 QVSTQVSQSY FDGYCGWVHG SSSLQOQFLP PQNQCMKQVP LQVDGWISKA**  
**101 EEQCSQKRFL VFDQSGDQTT LLLASDIRKS FETLKQHACP DMKEELQRSN**  
**151 KDLFVCHGMQ GNSEPD LKED SEELNALLYS EDESGYCSEE DEVTSADHSP**  
**201 SIVVSGREDQ KTF LGSYGQP LNAKRRKILE TSNESMRDAE SSCGSCDNTR**  
**251 ISFLKRSKLS SNKIGEEKIF ETVSLLRSVV PGEELVDPIL VIDRAIDYLK**  
**301 SLKMEAKNRE A**

Matched peptides information:

| Start - End | Observed  | Mr(expt)  | Mr(calc)  | ppm  | Miss | Sequence                        |
|-------------|-----------|-----------|-----------|------|------|---------------------------------|
| 2 - 13      | 1365.5944 | 1364.5871 | 1364.6586 | -52  | 1    | M.GQDRGFGFPTQR.L                |
| 14 - 35     | 2383.7732 | 2382.7659 | 2382.2941 | 198  | 1    | R.LCSLSSLALSHLGKQDLNLVSK.T      |
| 36 - 47     | 1407.6909 | 1406.6836 | 1406.5443 | 99   | 0    | K.TCGD TDMFSTR.G Oxidation (M)  |
| 109 - 128   | 2238.8762 | 2237.8689 | 2238.1532 | -127 | 0    | R.FLVFDQSGDQT TLLASDIR.K        |
| 109 - 129   | 2366.9865 | 2365.9792 | 2366.2482 | -114 | 1    | R.FLVFDQSGDQT TLLASDIRK.S       |
| 130 - 143   | 1707.7195 | 1706.7122 | 1706.7756 | -37  | 1    | K.SFETLKQHACPMK.E Oxidation (M) |
| 136 - 148   | 1657.7221 | 1656.7148 | 1656.7348 | -12  | 1    | K.QHACPMKEELQR.S Oxidation (M)  |
| 227 - 237   | 1307.6347 | 1306.6274 | 1306.6551 | -21  | 1    | R.KILETSNESMR.D                 |
| 227 - 237   | 1323.6453 | 1322.6380 | 1322.6500 | -9   | 1    | R.KILETSNESMR.D Oxidation (M)   |
| 228 - 237   | 1179.5737 | 1178.5664 | 1178.5601 | 5    | 0    | K.ILETSNESMR.D                  |
| 238 - 250   | 1458.6735 | 1457.6662 | 1457.5147 | 104  | 0    | R.DAESSCGSCDNTR.I               |
| 269 - 277   | 1077.5523 | 1076.5450 | 1076.6230 | -72  | 0    | K.IFETVSLLR.S                   |
| 278 - 300   | 2553.0626 | 2552.0553 | 2552.4101 | -139 | 1    | R.SVVPGEELVDPILVIDRAIDYLK.S     |

Spot No.: **154**

Mascot score: **127** Sequence coverage %: **33**

NCBI accession No.: **gi| 26450878**

Matched peptides No.: **10**

Total peptides No.: **14**

Calculated Mr: **34325**

Calculated pI: **5.09**

### Annotated PMF spectra:

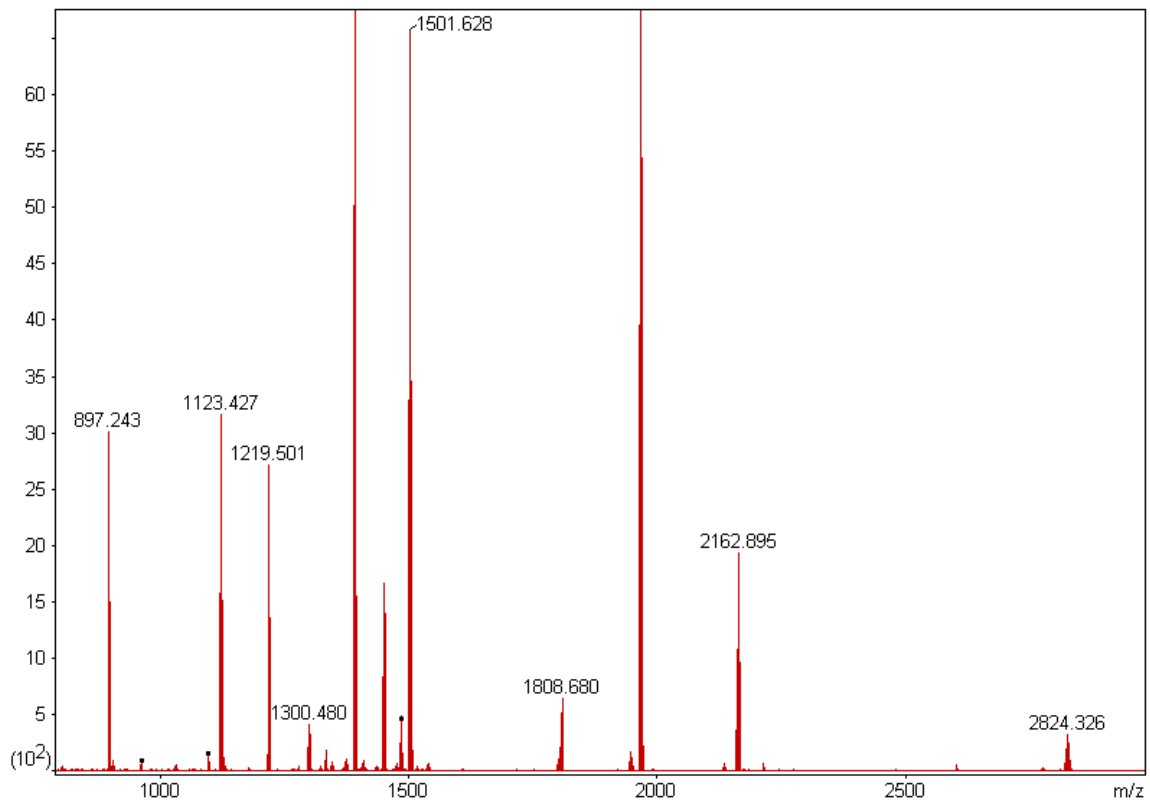

### Probability Based Mowse Score:

Protein score is  $-10 \cdot \log(P)$ , where P is the probability that the observed match is a random event. Protein scores greater than 72 are significant ( $p < 0.05$ ).

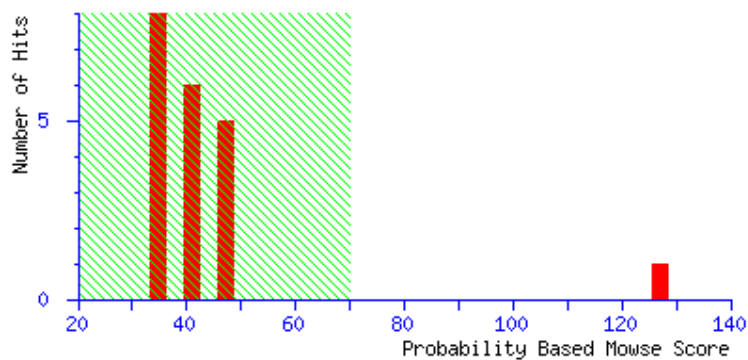

Matched peptide sequences: shown in **Bold Red**

```

1 MTSSNITPRA MATQOLENAD QLIDSVETFI LDCDGVIVKG DKLIEGVPET
51 LDMLRAKGKR LVFVTNNSTK SRKQYGKKFE TLGLNVNEEE IFASSFAAAA
101 YLQSINFPKD KKVYVIGEEG ILKELELAGF QYLGPPDDGK RQIELKPGFL
151 MEHDHDVGAV VVGFDRYFNY YKIQYGTLCI RENPGCLFIA TNRDAVTHLT
201 DAQEWAGGGS MVGALVGSTQ REPLVVGKPS TFMMDYLADK FGIQKSQICM
251 VGDRLDTDIL FGQNGGCKTL LVLSGVTSIS MLESPENKIQ PDFYTSKISD
301 FLSPKAATV

```

Matched peptides information:

| Start - End | Observed  | Mr(expt)  | Mr(calc)  | ppm  | Miss Sequence                                  |
|-------------|-----------|-----------|-----------|------|------------------------------------------------|
| 43 - 55     | 1485.6061 | 1484.5988 | 1484.7908 | -129 | 0 K.LIEGVPETLDMLR.A                            |
| 43 - 55     | 1501.6284 | 1500.6211 | 1500.7858 | -110 | 0 K.LIEGVPETLDMLR.A Oxidation (M)              |
| 113 - 123   | 1219.5011 | 1218.4938 | 1218.6860 | -158 | 0 K.VYVIGEEGILK.E                              |
| 124 - 140   | 1808.6804 | 1807.6731 | 1807.8628 | -105 | 0 K.ELELAGFQYLGPPDDGK.R                        |
| 124 - 141   | 1964.8144 | 1963.8071 | 1963.9639 | -80  | 1 K.ELELAGFQYLGPPDDGKR.Q                       |
| 142 - 166   | 2824.3256 | 2823.3183 | 2823.4014 | -29  | 0 R.QIELKPGFLMEHDHDVGAVVVGFD.R.Y Oxidation (M) |
| 167 - 172   | 897.2426  | 896.2354  | 896.4068  | -191 | 0 R.YFNYYK.I                                   |
| 173 - 181   | 1123.4275 | 1122.4202 | 1122.5856 | -147 | 0 K.IQYGTLCIR.E                                |
| 182 - 193   | 1391.5129 | 1390.5056 | 1390.6663 | -116 | 0 R.ENPGCLFIATNR.D                             |
| 289 - 297   | 1098.3473 | 1097.3400 | 1097.5393 | -182 | 0 K.IQPDFYTSK.I                                |

Spot No.: **155**

Mascot score: **90**    Sequence coverage %: **35**

NCBI accession No.: **gi| 225437683**

Matched peptides No.: **20**

Total peptides No.: **109**

Calculated Mr: **46872**

Calculated pI: **8.44**

### Annotated PMF spectra:

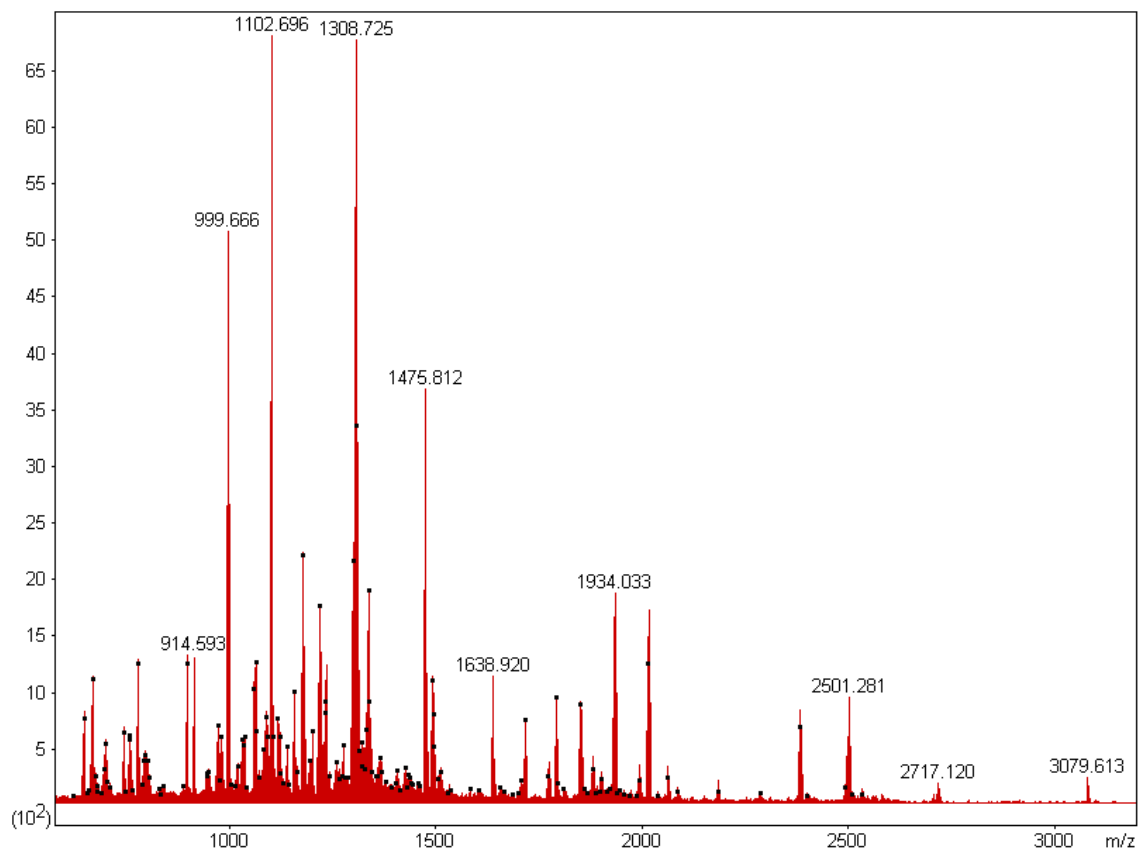

### Probability Based Mowse Score:

Protein score is  $-10 \cdot \log(P)$ , where P is the probability that the observed match is a random event. Protein scores greater than 72 are significant ( $p < 0.05$ ).

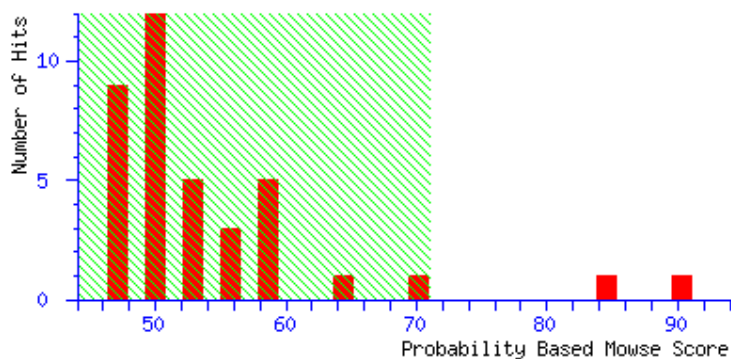

## Matched peptide sequences: shown in **Red**

**1 MASVSIAPAS GLREPNQNTV GVDRLPDEM DMKIRDDKEM** EDTVVDGNMT  
**51 ETGHIIIVTTI GGKNGQPKQT ISYMAERVVG** HGSFGVVFQA **KCLETGETVA**  
**101 IKKVLQDKRY KNRELQTMRL LDHPNVVSLK** HCFFSTTEKE ELYLNLVLEY  
**151 VPETVHRVIK HYNKMNQRMP MIYVKLYTYQ** ICRALAYIHG GIGVCHRDIK  
**201 PQNLLVNPHT HQLKLCDFGS AKVLVKGELN** ISYICSRYYR APELIFGATE  
**251 YTTAIDIWSA GCVLAELLG QPLFPGESGV** DQLVEIIKVL **GTPTREEIKC**  
**301 MNPNYTEFKF PQIKAHPWHK IFHKRMPPEA** **VDLVSRLLOQY** SPNLRSTALE  
**351 ALIHPFFDEL REPNTRLPNG RFLPPLFNFK** PHELK**GVPVD MLVKLIPEHA**  
**401 RKQCAFLGL**

## Matched peptides information:

| Start - End | Observed  | Mr(expt)  | Mr(calc)  | ppm | Miss | Sequence                         |
|-------------|-----------|-----------|-----------|-----|------|----------------------------------|
| 1 - 13      | 1259.7054 | 1258.6981 | 1258.6703 | 22  | 0    | -.MASVSIAPASGLR.E                |
| 1 - 13      | 1275.7016 | 1274.6943 | 1274.6653 | 23  | 0    | -.MASVSIAPASGLR.E Oxidation (M)  |
| 14 - 24     | 1157.6387 | 1156.6314 | 1156.5473 | 73  | 0    | R.EPQNGTVGVDR.L                  |
| 25 - 33     | 1092.5663 | 1091.5590 | 1091.4627 | 88  | 0    | R.LPDEMNDMK.I                    |
| 25 - 33     | 1124.6722 | 1123.6649 | 1123.4525 | 189 | 0    | R.LPDEMNDMK.I 2 Oxidation (M)    |
| 64 - 77     | 1638.9200 | 1637.9127 | 1637.7831 | 79  | 1    | K.NGQPKQTISYMAER.V Oxidation (M) |
| 92 - 102    | 1220.7883 | 1219.7810 | 1219.6118 | 139 | 0    | K.CLETGETVAIK.K                  |
| 104 - 109   | 758.5155  | 757.5083  | 757.4446  | 84  | 1    | K.VLQDKR.Y                       |
| 114 - 119   | 793.4953  | 792.4881  | 792.3800  | 136 | 0    | R.ELQTMRL.L Oxidation (M)        |
| 120 - 130   | 1234.6665 | 1233.6592 | 1233.7081 | -40 | 0    | R.LLDHPNVVSLK.H                  |
| 161 - 168   | 1090.5683 | 1089.5610 | 1089.5138 | 43  | 1    | K.HYNKMNQR.M                     |
| 165 - 175   | 1426.7696 | 1425.7623 | 1425.6931 | 49  | 1    | K.MNQRMPMIYVK.L Oxidation (M)    |
| 165 - 175   | 1442.7402 | 1441.7329 | 1441.6880 | 31  | 1    | K.MNQRMPMIYVK.L 2 Oxidation (M)  |
| 165 - 175   | 1458.7633 | 1457.7560 | 1457.6829 | 50  | 1    | K.MNQRMPMIYVK.L 3 Oxidation (M)  |
| 169 - 175   | 897.4932  | 896.4859  | 896.4500  | 40  | 0    | R.MPMIYVK.L Oxidation (M)        |
| 289 - 299   | 1242.6827 | 1241.6754 | 1241.6979 | -18 | 1    | K.VLGTPTREEIK.C                  |
| 315 - 324   | 1300.5975 | 1299.5902 | 1299.6989 | -84 | 1    | K.AHPWHKIFHK.R                   |
| 325 - 336   | 1369.7058 | 1368.6985 | 1368.7184 | -14 | 1    | K.RMPPEAVDLVSR.L                 |
| 386 - 394   | 973.5891  | 972.5818  | 972.5314  | 52  | 0    | K.GVPVDMLVK.L Oxidation (M)      |
| 386 - 401   | 1773.8973 | 1772.8900 | 1772.9971 | -60 | 1    | K.GVPVDMLVKLIPEHAR.K             |

Spot No.: **156**

Mascot score: **94** Sequence coverage %: **17**

NCBI accession No.: **gi| 159485986**

Matched peptides No.: **10**

Total peptides No.: **38**

Calculated Mr: **48240**

Calculated pI: **9.58**

### Annotated PMF spectra:

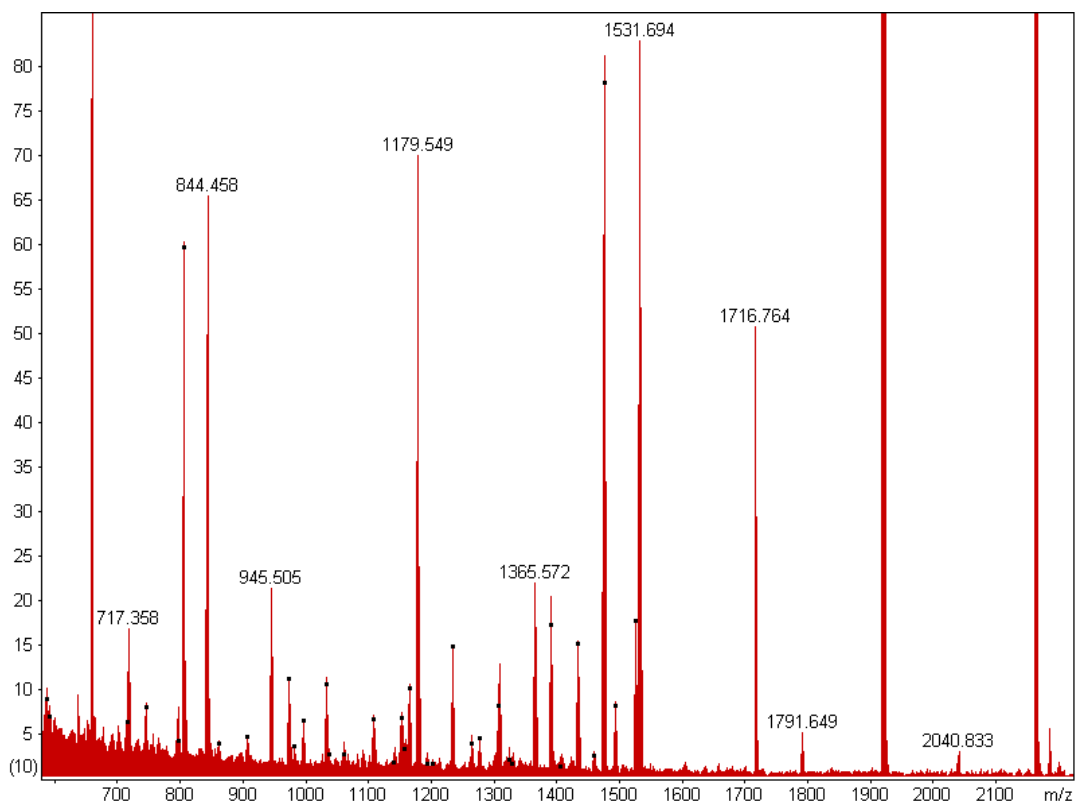

### Probability Based Mowse Score:

Protein score is  $-10 \cdot \log(P)$ , where  $P$  is the probability that the observed match is a random event. Protein scores greater than 72 are significant ( $p < 0.05$ ).

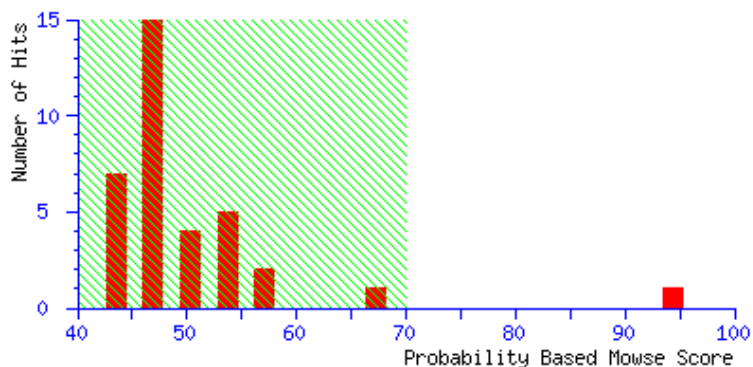



## Matched peptide sequences: shown in **Bold Red**

**1** **MPKGYGPQRL** VSFTEAQASG GSSISTLGSP GSAVNHSSRM SQQOPLERVI  
**51** LGELSPEKKP LPAAAAALRA IERAHRAARA **ATRSARQQKD** GVVASPAQFP  
**101** VLHDGLDLFR ALSGRWVPGP WGGPDEDQNM DQPSAGGSGS GSPRAAAAAA  
**151** DVAAVADTAG QAAAAGAGTG QATAMNDGVT QTSR**QNTEDG** **SGAEARRGTV**  
**201** SASGGASKRA SGTGAGSKAT **EMSGLASVEE** **APGAQEVDRA** AAAAAAEEAQAA  
**251** AAEEAEEAADA KAAAAAQAAA **AAKSKAVAVA** **AKAAEAEEAAA** AAAAAAETAAA  
**301** AEKARLERVT MPDSSAR**VTG** **MPGGDGLSEW** **LAARLRPAIP** KPKIPKAPAT  
**351** TAFLAAAAAAA ASTGVTTDST VQAPANAPAA SLRPCGPGAS ALQAAAA**AGV**  
**401** **QER**FLPAVAP ASAAKPSLHI AAPRGREALL ARGPGVGLNM VAGTGTTWSG  
**451** GYGYGSSSFG AGSYGGSGYG GRAGARPTGR MGSADSULA YGREKGGV

## Matched peptides information:

| Start - End | Observed  | Mr(expt)  | Mr(calc)  | ppm | Miss | Sequence                        |               |
|-------------|-----------|-----------|-----------|-----|------|---------------------------------|---------------|
| 1 - 9       | 1033.4805 | 1032.4732 | 1032.5175 | -43 | 1    | <b>-.MPKGYGPQR.L</b>            |               |
| 4 - 9       | 677.3046  | 676.2974  | 676.3293  | -47 | 0    | <b>K.GYGPQR.L</b>               |               |
| 77 - 83     | 716.3572  | 715.3499  | 715.4089  | -82 | 1    | <b>R.AARAATR.S</b>              |               |
| 84 - 89     | 717.3576  | 716.3503  | 716.3929  | -59 | 1    | <b>R.SARQK.D</b>                |               |
| 185 - 196   | 1234.5882 | 1233.5809 | 1233.5222 | 48  | 0    | <b>R.QNTEDGSGAEAR.R</b>         |               |
| 185 - 197   | 1390.6256 | 1389.6183 | 1389.6233 | -4  | 1    | <b>R.QNTEDGSGAEARR.G</b>        |               |
| 219 - 239   | 2163.0287 | 2162.0214 | 2161.9797 | 19  | 0    | <b>K.ATEMSGLASVEEAPGAQEVDRA</b> | Oxidation (M) |
| 274 - 282   | 844.4575  | 843.4502  | 843.5178  | -80 | 1    | <b>K.SKAVAVAAK.A</b>            |               |
| 318 - 334   | 1716.7641 | 1715.7568 | 1715.8301 | -43 | 0    | <b>R.VTGMPGGDGLSEWLAAR.L</b>    |               |
| 398 - 403   | 659.3703  | 658.3630  | 658.3398  | 35  | 0    | <b>R.AGVQER.F</b>               |               |

Spot No.: **157**

Mascot score: **98**

Sequence coverage %: **49**

NCBI accession No.: **gi| 312281705**

Matched peptides No.: **25**

Total peptides No.: **150**

Calculated Mr: **48202**

Calculated pI: **6.08**

### Annotated PMF spectra:

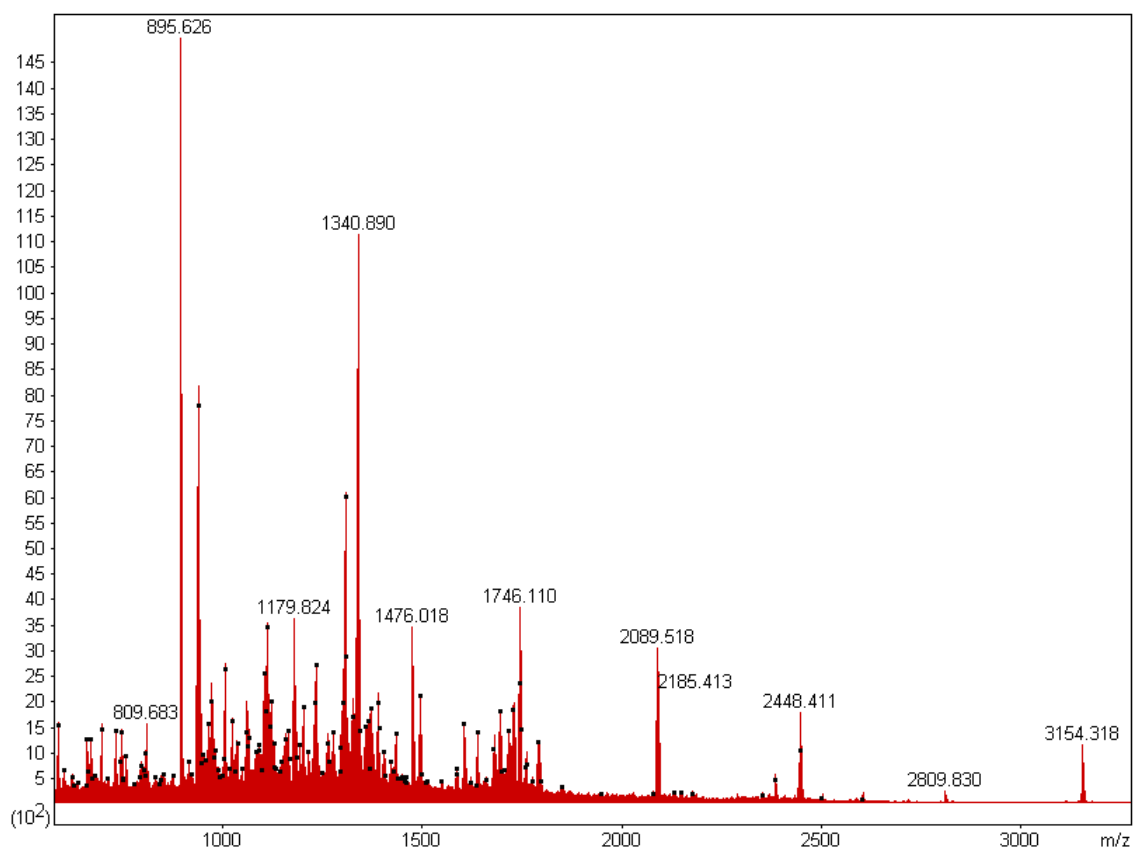

### Probability Based Mowse Score:

Protein score is  $-10 \cdot \log(P)$ , where P is the probability that the observed match is a random event. Protein scores greater than 72 are significant ( $p < 0.05$ ).

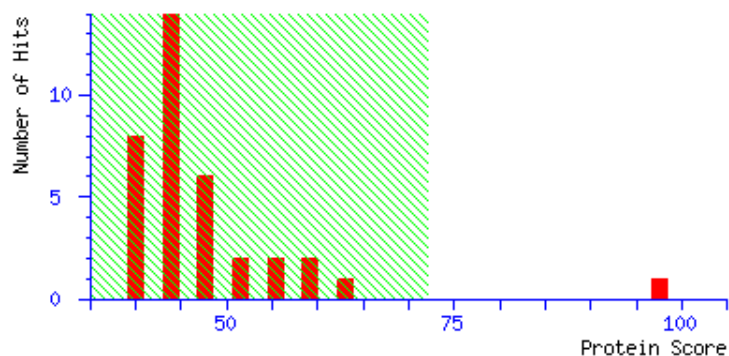

## Matched peptide sequences: shown in **Bold Red**

```

1 MAAAVSTVGA INRAPLSLNG SGAGAASVPA TTFLGKKVVT TSRFAQSNKK
51 SSGSFKVVAV KEDKQTDGDR WKGLAYDMSD DQQDITRGKG LVDSVFAQPM
101 GTGTHHAVLS SYEYISQGLR QYNLDNMDG FYIAPAFMDK LVVHITKNFL
151 TLPNIKVPLI LGIWGGKQG KSFQCELVMA KMGINPIMMS AGELESGNAG
201 EPAKLIRQRY REAADMIKKG KMCCLFINDL DAGAGRMGGI TQYTVNNQMV
251 NATLMNIADN PTNVQLPGMY NKEDNARVPI IVTGNDFSTL YAPLIRDGRM
301 EKFYWAPTRE DRIGVCKGIF RTDKINDEDI VTLVDQFPQG SIDFFGALRA
351 RVYDDEVRRK VEGLGVEKIG KRLVNSREGP PVFEQPEMIL EKLMEYGNML
401 VMEQENVKRV QLADQYLNEA ALGDANADAI DRGIFYG

```

## Matched peptides information:

| Start - End | Observed  | Mr(expt)  | Mr(calc)  | ppm | Miss | Sequence                                    |
|-------------|-----------|-----------|-----------|-----|------|---------------------------------------------|
| 65 - 72     | 1005.6833 | 1004.6760 | 1004.4676 | 208 | 1    | K.QTDGDRWK.G                                |
| 73 - 87     | 1744.0665 | 1743.0592 | 1742.7417 | 182 | 0    | K.GLAYDMSDDQQDITR.G Oxidation (M)           |
| 121 - 140   | 2384.3450 | 2383.3377 | 2383.0323 | 128 | 0    | R.QYNLDNMDGQFYIAPAFMDK.L                    |
| 141 - 147   | 809.6827  | 808.6755  | 808.5171  | 196 | 0    | K.LVVHITK.N                                 |
| 148 - 156   | 1059.7919 | 1058.7846 | 1058.6124 | 163 | 0    | K.NFLTLPNIK.V                               |
| 182 - 204   | 2352.4496 | 2351.4423 | 2351.0443 | 169 | 0    | K.MGINPIMMSAGELESGNAGEPAK.L 3 Oxidation (M) |
| 210 - 218   | 1096.7576 | 1095.7503 | 1095.5382 | 194 | 1    | R.YREADMIC.K                                |
| 210 - 218   | 1112.7508 | 1111.7435 | 1111.5332 | 189 | 1    | R.YREADMIC.K Oxidation (M)                  |
| 212 - 218   | 793.5775  | 792.5702  | 792.3687  | 254 | 0    | R.EADMIC.K Oxidation (M)                    |
| 222 - 236   | 1729.0484 | 1728.0411 | 1727.7430 | 173 | 0    | K.MCCLFINDLDAGAGR.M Oxidation (M)           |
| 278 - 296   | 2089.5182 | 2088.5109 | 2088.1619 | 167 | 0    | R.VPIIVTGNDFSTLYAPLIR.D                     |
| 297 - 302   | 751.5327  | 750.5254  | 750.3330  | 256 | 1    | R.DGRMEK.F Oxidation (M)                    |
| 300 - 309   | 1344.8954 | 1343.8881 | 1343.6332 | 190 | 1    | R.MEKFYWAPTR.E Oxidation (M)                |
| 303 - 309   | 940.6795  | 939.6722  | 939.4603  | 226 | 0    | K.FYWAPTR.E                                 |
| 303 - 312   | 1340.8900 | 1339.8827 | 1339.6309 | 188 | 1    | K.FYWAPTREDR.I                              |
| 322 - 349   | 3154.3180 | 3153.3107 | 3152.5666 | 236 | 1    | R.TDKINDEDIVTLVDQFPQGSIDFFGALR.A            |
| 325 - 349   | 2809.8298 | 2808.8225 | 2808.3970 | 152 | 0    | K.INDEDIVTLVDQFPQGSIDFFGALR.A               |
| 350 - 358   | 1122.7735 | 1121.7662 | 1121.5465 | 196 | 1    | R.ARVYDDEV.R                                |
| 352 - 358   | 895.6260  | 894.6187  | 894.4083  | 235 | 0    | R.VYDDEV.R                                  |
| 352 - 359   | 1023.7215 | 1022.7142 | 1022.5033 | 206 | 1    | R.VYDDEV.RK.F                               |
| 359 - 368   | 1105.8171 | 1104.8098 | 1104.6179 | 174 | 1    | R.KFVEGLGVEK.I                              |
| 360 - 368   | 977.7059  | 976.6986  | 976.5229  | 180 | 0    | K.FVEGLGVEK.I                               |
| 372 - 377   | 744.5939  | 743.5867  | 743.4402  | 197 | 1    | K.RLVNSR.E                                  |
| 409 - 432   | 2602.7464 | 2601.7391 | 2601.2783 | 177 | 1    | K.RVQLADQYLNEAALGDANADAIDR.G                |
| 410 - 432   | 2446.5957 | 2445.5884 | 2445.1772 | 168 | 0    | R.VQLADQYLNEAALGDANADAIDR.G                 |

Spot No.: **158**

Mascot score: **82**

Sequence coverage %: **54**

NCBI accession No.: **gi| 223515525**

Matched peptides No.: **9**

Total peptides No.: **55**

Calculated Mr: **17518**

Calculated pI: **10.83**

### Annotated PMF spectra:

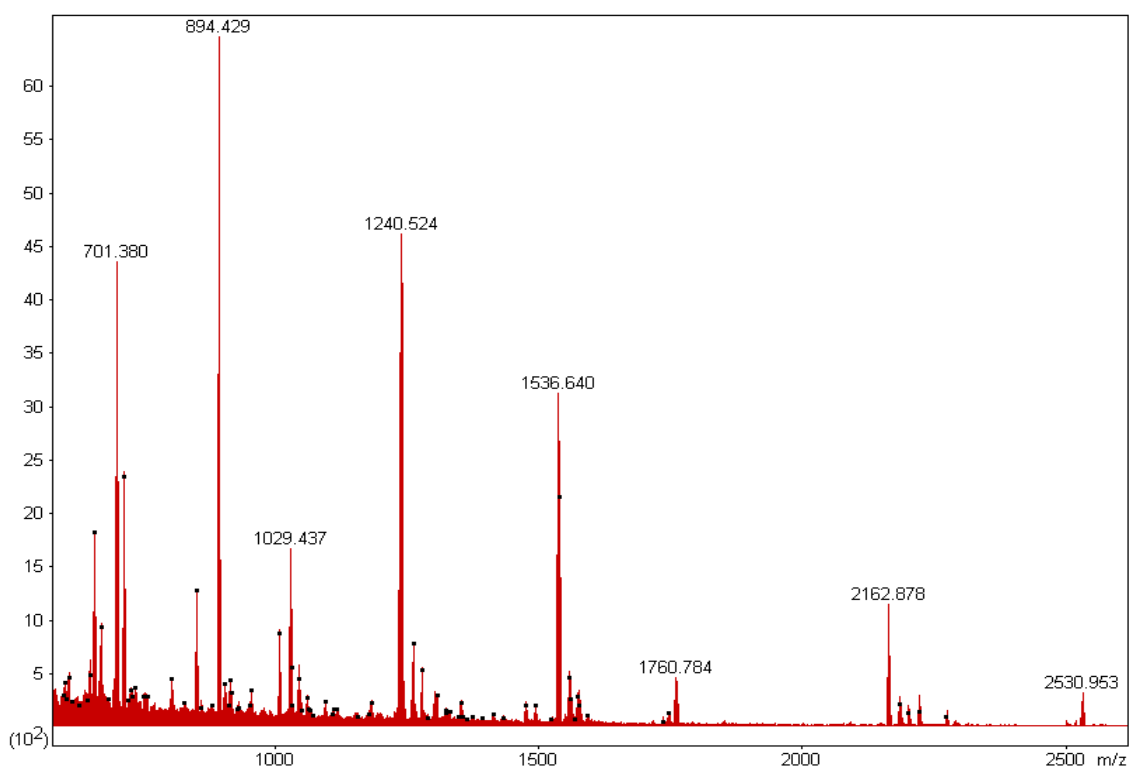

### Probability Based Mowse Score:

Protein score is  $-10 \cdot \log(P)$ , where P is the probability that the observed match is a random event. Protein scores greater than 72 are significant ( $p < 0.05$ ).

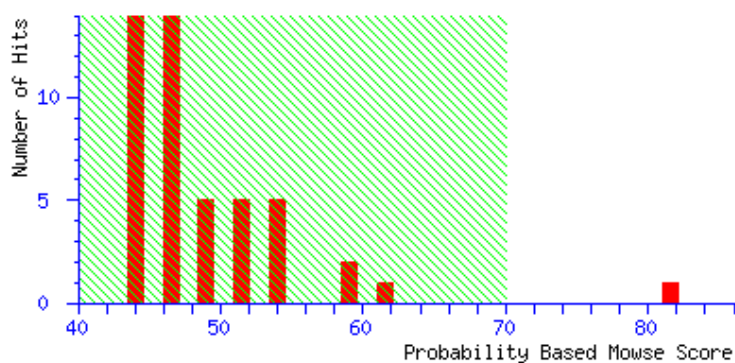

Matched peptide sequences: shown in **Bold Red**

1 AIVVRR**QAEV LAADGDHVR**I **QLDGRHAR**LR ETLVAELR**QR GA**AE**QLHDA**  
51 **ARLRQEQHPH** HHHLDFV**FELD RIGPRQPHRA LHP**RG**AEVQR AHAF**EF**GDRG**  
101 **RRVAGPGEAG IPGVR**HYGND HAYWTGCQAA TVWPFFSVGL KRHSR**SAASA**  
151 **AWSRIA**

Matched peptides information:

| Start - End | Observed  | Mr(expt)  | Mr(calc)  | ppm  | Miss | Sequence           |
|-------------|-----------|-----------|-----------|------|------|--------------------|
| 6 - 19      | 1536.6396 | 1535.6323 | 1535.7804 | -96  | 1    | R.RQAEVLAADGDHVR.I |
| 20 - 25     | 701.3802  | 700.3729  | 700.3868  | -20  | 0    | R.IQLDGR.H         |
| 20 - 28     | 1065.4357 | 1064.4284 | 1064.5839 | -146 | 1    | R.IQLDGRHAR.L      |
| 39 - 52     | 1493.6025 | 1492.5952 | 1492.7495 | -103 | 1    | R.QRGAAEQLHDAAR.L  |
| 76 - 84     | 1111.4633 | 1110.4560 | 1110.6159 | -144 | 1    | R.QPHRALHPR.G      |
| 85 - 90     | 659.3662  | 658.3589  | 658.3398  | 29   | 0    | R.GAEVQR.A         |
| 91 - 101    | 1262.5222 | 1261.5149 | 1261.5952 | -64  | 1    | R.AHAFEFGDRGR.R    |
| 103 - 115   | 1179.4846 | 1178.4773 | 1178.6408 | -139 | 0    | R.VAGPGEAGIPGVR.H  |
| 146 - 154   | 906.4189  | 905.4116  | 905.4355  | -26  | 0    | R.SAASAWSR.I       |

Spot No.: **159**

Mascot score: **96**    Sequence coverage %: **27**

NCBI accession No.: **gi| 166406194**

Matched peptides No.: **15**

Total peptides No.: **119**

Calculated Mr: **47715**

Calculated pI: **5.84**

### Annotated PMF spectra:

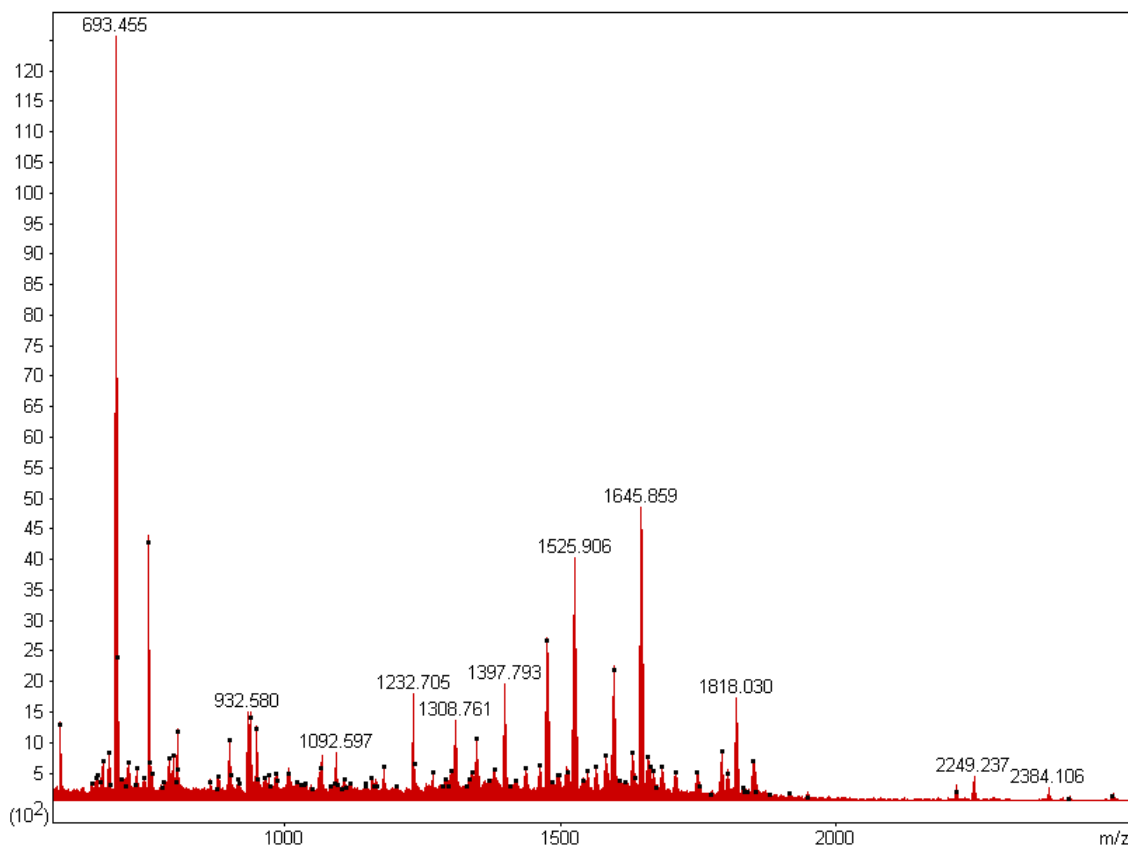

### Probability Based Mowse Score:

Protein score is  $-10 \cdot \log(P)$ , where P is the probability that the observed match is a random event. Protein scores greater than 72 are significant ( $p < 0.05$ ).

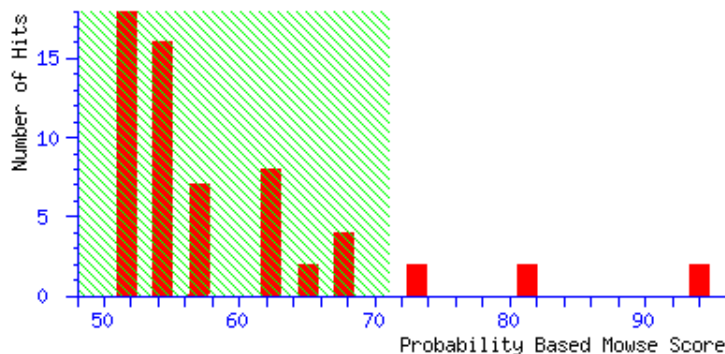

## Matched peptide sequences: shown in **Bold Red**

**1** MAQILAASPT CQMRL**TKPSS** **IASSK**LWNSV VLKQKEQSSS KVRSEFKVMAL  
**51** QSDNSTINRV **ESLLNLDTKP** **FTDR**IIAEYI WIGGSGIDLR SKSR**TLEKPV**  
**101** **EDPSEL**PKWN YDGSSTGQAP GEDSEVILYP QAIFRDPFRG GNMILVICDT  
**151** YTPAGEPIPT NKRRA**AAEIF** **SNKKV**NEEIP WFGIEQEYTL LQPNVNWPLG  
**201** WPVGAYPGPQ GPYYCGVGAE KSWGR**DISDA** **HYK**ACLYAGI NISGTNGEVM  
**251** PGQWEFQVGP SVGIEAGDHV WCAR**YLLER**I TEQAGVVLTL DPKPIEGDWN  
**301** GAGCHTNYST KSMREDGGFE VIKK**AILNLS** **LRHMEHISAY** **GEGNERR**LG  
**351** **KHETASIDQF** **SWG**VANRGCS IRVGR**DETEK** **GKGYLED**RRP ASNMDPYIVT  
**401** SLLAETLLW EPTLEAEALA AOKLSLKV

## Matched peptides information:

| Start - End | Observed  | Mr(expt)  | Mr(calc)  | ppm | Miss | Sequence                                   |
|-------------|-----------|-----------|-----------|-----|------|--------------------------------------------|
| 15 - 25     | 1118.6023 | 1117.5950 | 1117.6343 | -35 | 0    | R.LTKPSS <b>IASSK</b> .L                   |
| 60 - 74     | 1748.0518 | 1747.0445 | 1746.9152 | 74  | 0    | R.VESLLNLDTKP <b>FTDR</b> .I               |
| 95 - 108    | 1581.8891 | 1580.8818 | 1580.8297 | 33  | 0    | R.TLEK <b>PVEDPSEL</b> PK.W                |
| 166 - 173   | 879.4962  | 878.4889  | 878.4498  | 45  | 0    | R. <b>AAEIF</b> SNK.K                      |
| 226 - 233   | 948.5132  | 947.5059  | 947.4348  | 75  | 0    | R. <b>DISDA</b> HYK.A                      |
| 275 - 279   | 693.4549  | 692.4477  | 692.3857  | 89  | 0    | R. <b>YLLER</b> .I                         |
| 325 - 332   | 899.6318  | 898.6245  | 898.5600  | 72  | 0    | K. <b>AILNLS</b> L.R.H                     |
| 333 - 346   | 1629.8539 | 1628.8466 | 1628.7001 | 90  | 0    | R. <b>HMEHISAY</b> GEGNER.R                |
| 333 - 346   | 1645.8592 | 1644.8519 | 1644.6950 | 95  | 0    | R. <b>HMEHISAY</b> GEGNER.R Oxidation (M)  |
| 333 - 347   | 1801.9793 | 1800.9720 | 1800.7961 | 98  | 1    | R. <b>HMEHISAY</b> GEGNER.L Oxidation (M)  |
| 348 - 367   | 2217.2330 | 2216.2257 | 2216.0974 | 58  | 1    | R.LTG <b>KHETASIDQF</b> SWG <b>VANR</b> .G |
| 352 - 367   | 1818.0300 | 1817.0227 | 1816.8493 | 95  | 0    | K. <b>HETASIDQF</b> SWG <b>VANR</b> .G     |
| 373 - 379   | 804.4766  | 803.4693  | 803.4137  | 69  | 1    | R.VGR <b>DETEK</b> .K                      |
| 381 - 388   | 937.5547  | 936.5474  | 936.4665  | 86  | 1    | K. <b>GKGYLED</b> R.R                      |
| 383 - 388   | 752.4234  | 751.4162  | 751.3501  | 88  | 0    | K. <b>GYLED</b> R.R                        |

Spot No.: **160**

Mascot score: **120**    Sequence coverage %: **50**

NCBI accession No.: **gi| 312281705**

Matched peptides No.: **27**

Total peptides No.: **147**

Calculated Mr: **48202**

Calculated pI: **6.08**

### Annotated PMF spectra:

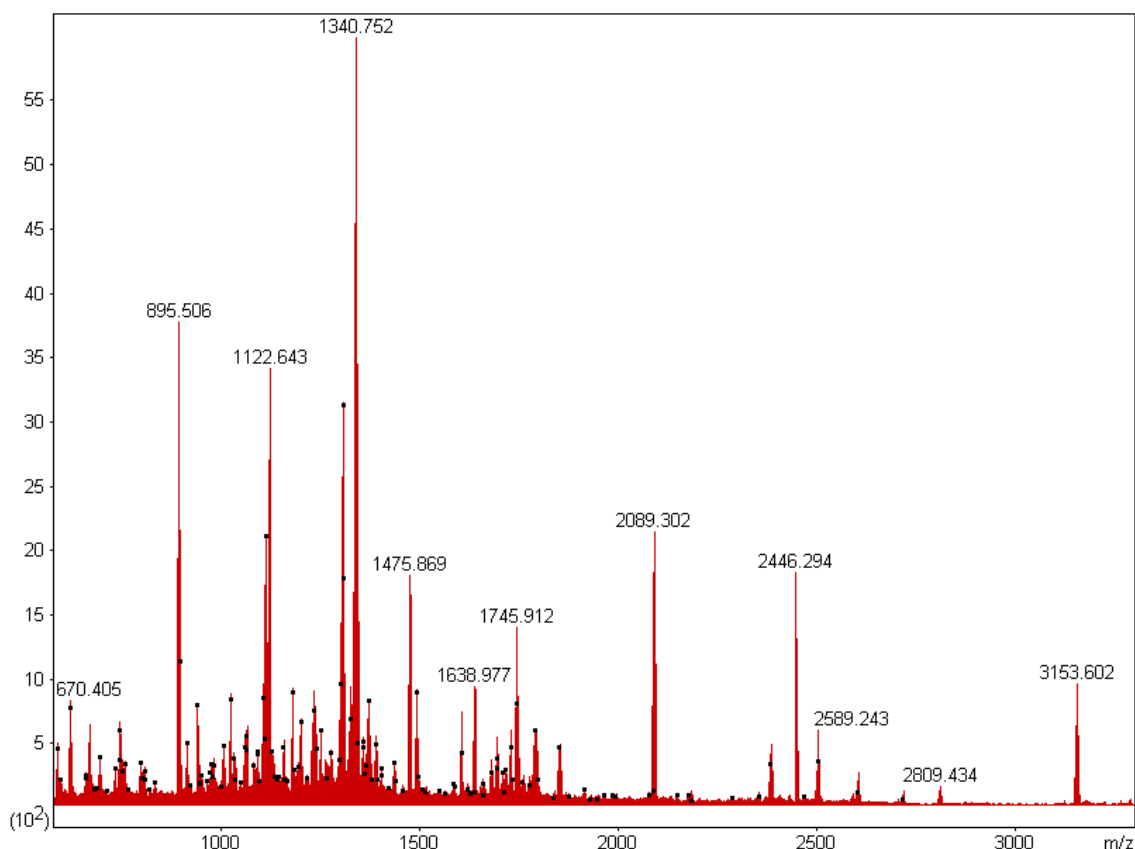

### Probability Based Mowse Score:

Protein score is  $-10 \cdot \log(P)$ , where P is the probability that the observed match is a random event. Protein scores greater than 72 are significant ( $p < 0.05$ ).

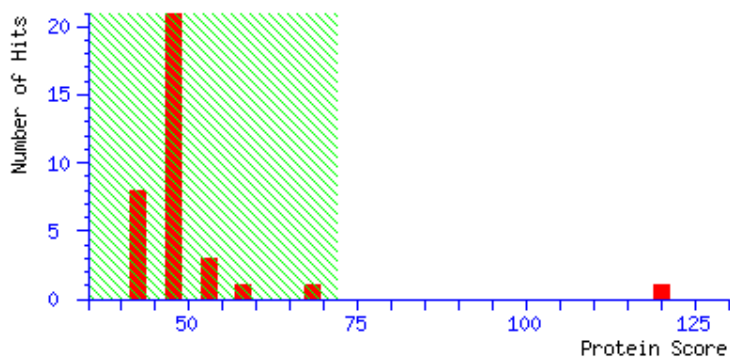



## Matched peptide sequences: shown in **Bold Red**

1 MAAAVSTVGA INRAPLSLNG SGAGAASVPA TTFLGKKVVT TSRFAQSNKK  
 51 **SSGSFKVVAV KEDKQTDGDR WKGLAYDMSD DQQDITRGKG LVDSVFAQPM**  
 101 GTGTHHAVLS SYEYISQGLR **QYNLDNMDG FYIAPAFMDK LVVHITKNFL**  
 151 TLPNIKVPLI LGIWGGKGGQ KSFQCELVMA **KMGINPIMMS AGELESGNAG**  
 201 **EPAKLIRQRY REAADMIKKG KCCLFINDL DAGAGRMGGT TQYTVNNQMV**  
 251 NATLMNIADN PTNVQLPGMY NKEDNARVPI **IVTGNDFSTL YAPLIRDGRM**  
 301 **EKFYWAPTRE DRIGVCKGIF RTDKINDEDI VTLVDQFPQG SIDFFGALRA**  
 351 **RVYDDEVRKF VEGGLGVEKIG KRLVNSREGP PVFEQPEMTL EKLMEYGNML**  
 401 **VMEQENVKRV QLADQYLNEA ALGDANADAI DRGTFYFG**

## Matched peptides information:

| Start - End | Observed  | Mr (expt) | Mr (calc) | ppm | Miss Sequence                                 |
|-------------|-----------|-----------|-----------|-----|-----------------------------------------------|
| 51 - 61     | 1108.5867 | 1107.5794 | 1107.6288 | -45 | 1 K.SSGSFKVVAVK.E                             |
| 65 - 72     | 1005.5475 | 1004.5402 | 1004.4676 | 72  | 1 K.QTDGDRWK.G                                |
| 73 - 87     | 1743.8751 | 1742.8678 | 1742.7417 | 72  | 0 K.GLAYDMSDDQQDITR.G Oxidation (M)           |
| 121 - 140   | 2384.0544 | 2383.0471 | 2383.0323 | 6   | 0 R.QYNLDNMDGFYIAPAFMDK.L                     |
| 141 - 147   | 809.5610  | 808.5538  | 808.5171  | 45  | 0 K.LVVHITK.N                                 |
| 182 - 204   | 2352.1759 | 2351.1686 | 2351.0443 | 53  | 0 K.MGINPIMMSAGELESGNAGEPAK.L 3 Oxidation (M) |
| 208 - 211   | 622.3981  | 621.3908  | 621.3347  | 90  | 1 R.QRYR.E                                    |
| 210 - 218   | 1112.6107 | 1111.6034 | 1111.5332 | 63  | 1 R.YREADMIC.K Oxidation (M)                  |
| 222 - 236   | 1712.8980 | 1711.8907 | 1711.7480 | 83  | 0 K.MCCLFINDLDAGAGR.M                         |
| 222 - 236   | 1728.8831 | 1727.8758 | 1727.7430 | 77  | 0 K.MCCLFINDLDAGAGR.M Oxidation (M)           |
| 278 - 296   | 2089.3015 | 2088.2942 | 2088.1619 | 63  | 0 R.VPIIVTGNDFSTLYAPLIR.D                     |
| 278 - 296   | 2089.7555 | 2088.7482 | 2088.1619 | 281 | 0 R.VPIIVTGNDFSTLYAPLIR.D                     |
| 297 - 302   | 751.4040  | 750.3967  | 750.3330  | 85  | 1 R.DGRMEK.F Oxidation (M)                    |
| 300 - 309   | 1344.7363 | 1343.7290 | 1343.6332 | 71  | 1 R.MEKFYWAPTR.E Oxidation (M)                |
| 303 - 309   | 940.5599  | 939.5526  | 939.4603  | 98  | 0 K.FYWAPTR.E                                 |
| 303 - 312   | 1340.7522 | 1339.7449 | 1339.6309 | 85  | 1 K.FYWAPTREDR.I                              |
| 322 - 349   | 3153.6023 | 3152.5950 | 3152.5666 | 9   | 1 R.TDKINDEDIVTLVDQFPQSIDFFGALR.A             |
| 325 - 349   | 2809.4342 | 2808.4269 | 2808.3970 | 11  | 0 K.INDEDIVTLVDQFPQSIDFFGALR.A                |
| 350 - 358   | 1122.6428 | 1121.6355 | 1121.5465 | 79  | 1 R.ARVDDEVR.K                                |
| 352 - 358   | 895.5063  | 894.4990  | 894.4083  | 101 | 0 R.VYDDEVR.K                                 |
| 352 - 359   | 1023.5947 | 1022.5874 | 1022.5033 | 82  | 1 R.VYDDEVRK.F                                |
| 359 - 368   | 1105.6777 | 1104.6704 | 1104.6179 | 48  | 1 R.KFVEGLGVEK.I                              |
| 360 - 368   | 977.5640  | 976.5567  | 976.5229  | 35  | 0 K.FVEGLGVEK.I                               |
| 372 - 377   | 744.5007  | 743.4934  | 743.4402  | 72  | 1 K.RLVNSR.E                                  |
| 373 - 377   | 588.4139  | 587.4066  | 587.3391  | 115 | 0 R.LVNSR.E                                   |
| 409 - 432   | 2602.3869 | 2601.3796 | 2601.2783 | 39  | 1 K.RVQLADQYLNEAALGDANADAIDR.G                |
| 410 - 432   | 2446.2937 | 2445.2864 | 2445.1772 | 45  | 0 R.VQLADQYLNEAALGDANADAIDR.G                 |

Spot No.: **161**

Mascot score: **84** Sequence coverage %: **15**

NCBI accession No.: **gi| 116060520**

Matched peptides No.: **7**

Total peptides No.: **21**

Calculated Mr: **30727**

Calculated pI: **5.06**

### Annotated PMF spectra:

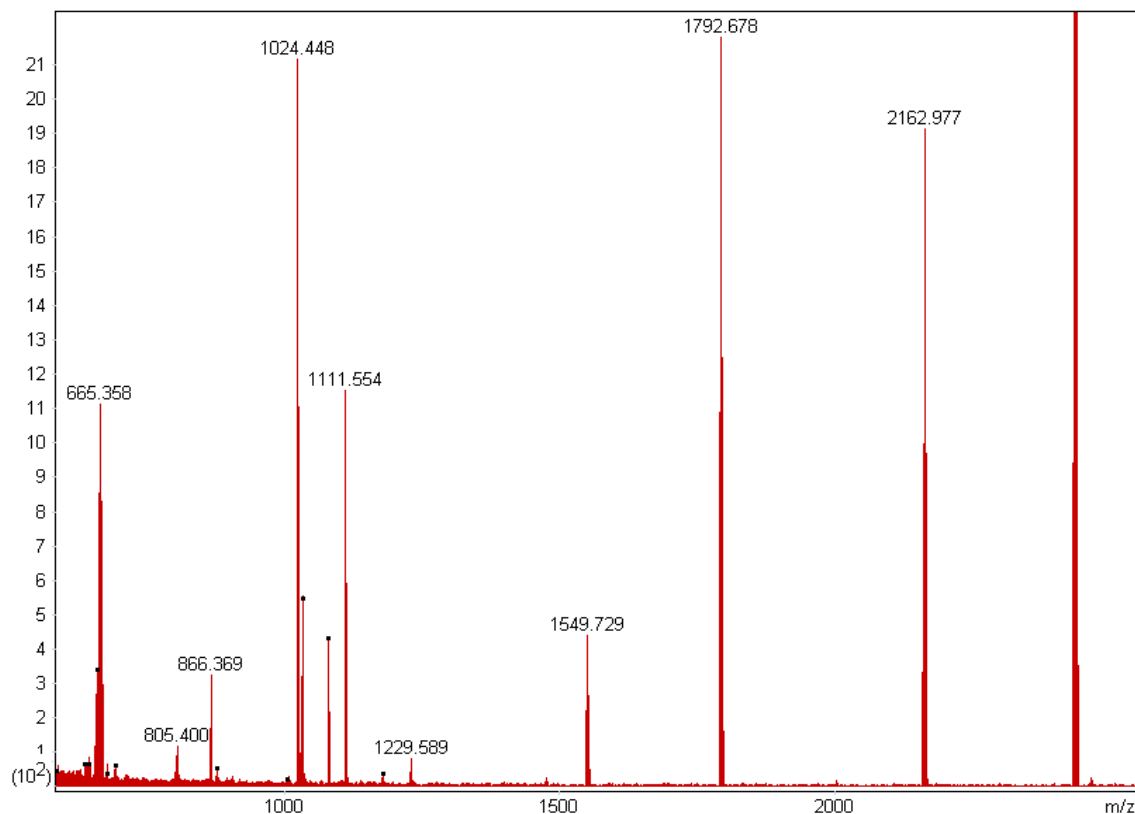

### Probability Based Mowse Score:

Protein score is  $-10 \cdot \log(P)$ , where P is the probability that the observed match is a random event. Protein scores greater than 72 are significant ( $p < 0.05$ ).

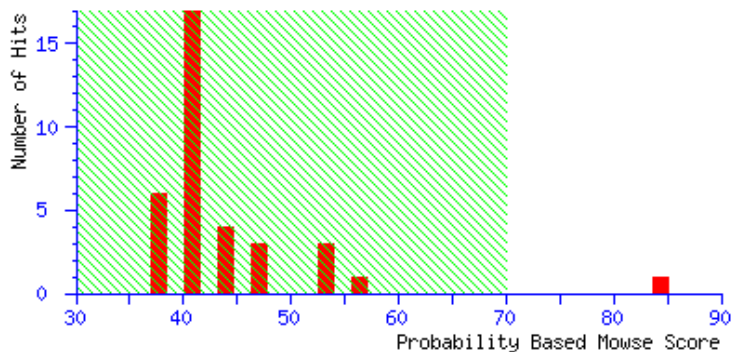

## Matched peptide sequences: shown in **Bold Red**

1 MAASASSLAL SSFNPKSLPF GVSRLPASVSL LSPSLSFKLN SDSVSFSIAA  
51 KWNTPASRFV RNVAITSEFE VEEDGFADVA PPKE**EQSF SAD** LKLFVGNLPP  
101 NVDSAQLAQL FESAGNVEMV EVIYDKITGR SRGFGFVTMS SVSEVEAAAQ  
151 QFNGYELDGR PLR**VNAGPPP** **PKREDFSRG** PRSSFSSSGS GYGGGGSSGA  
201 GSGNRVYVGN LSWGVDDMAL ESLFSEQGKV VEAR**VIYDRD** **SGRSKGF**GFV  
251 TYDSSQEVQN AIKSLDGADL DGRQIR**VSEA** **EARPPRRQY**

## Matched peptides information:

| Start - End | Observed  | Mr(expt)  | Mr(calc)  | ppm | Miss | Sequence       |
|-------------|-----------|-----------|-----------|-----|------|----------------|
| 84 - 92     | 1024.4478 | 1023.4405 | 1023.4873 | -46 | 0    | K.EQSF SADLK.L |
| 164 - 172   | 876.4655  | 875.4582  | 875.4865  | -32 | 0    | R.VNAGPPPK.R   |
| 164 - 173   | 1032.5032 | 1031.4959 | 1031.5876 | -89 | 1    | R.VNAGPPPKR.E  |
| 173 - 179   | 866.3694  | 865.3622  | 865.4042  | -49 | 1    | K.REDFSR.G     |
| 235 - 239   | 665.3575  | 664.3502  | 664.3544  | -6  | 0    | R.VIYDR.D      |
| 235 - 243   | 1080.5080 | 1079.5007 | 1079.5360 | -33 | 1    | R.VIYDRD SGR.S |
| 277 - 286   | 1111.5543 | 1110.5470 | 1110.5781 | -28 | 0    | R.VSEAEARPPR.R |

Spot No.: **162**

Mascot score: **93**    Sequence coverage %: **33**

NCBI accession No.: **gi| 15240578**

Matched peptides No.: **26**

Total peptides No.: **129**

Calculated Mr: **77064**

Calculated pI: **5.17**

### Annotated PMF spectra:

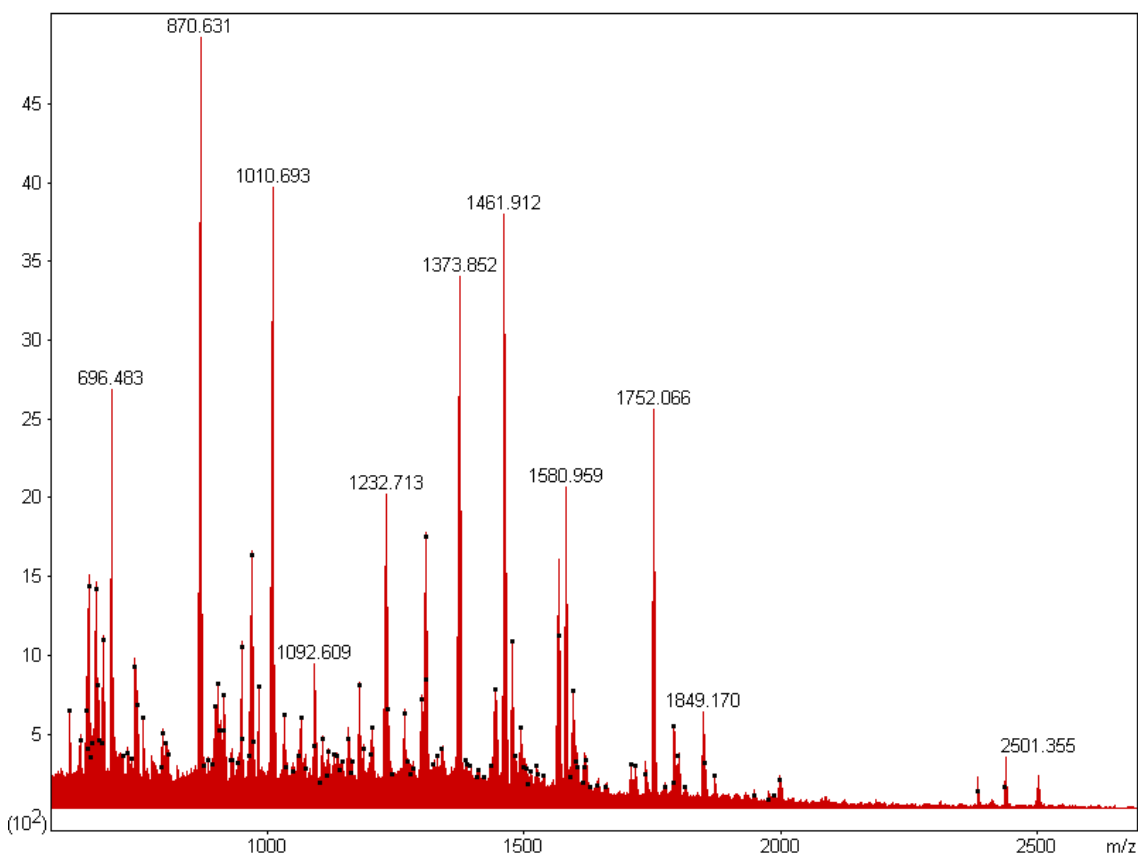

### Probability Based Mowse Score:

Protein score is  $-10 \cdot \log(P)$ , where  $P$  is the probability that the observed match is a random event. Protein scores greater than 72 are significant ( $p < 0.05$ ).

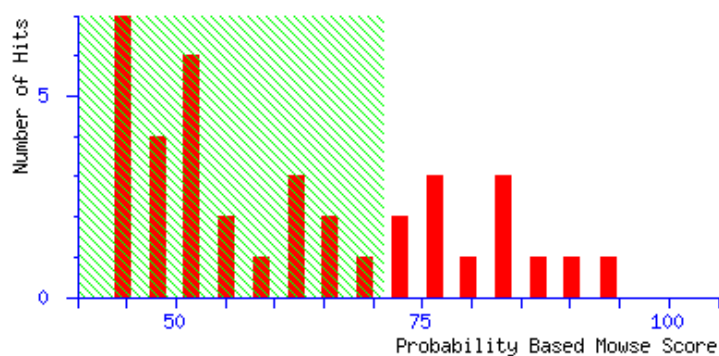

## Matched peptide sequences: shown in **Bold Red**

```

1 MASSAAQIHI LGGIGFPTSS SSSSTKNLDN KTNSIPRSVF FGNRTSPFTT
51 PTSAFRLMGR RNMNASRYTV GPVRVVNEKV VGIDLGTTNS AVAAAMEGGKP
101 TIVTNAEGQR TTPSVVAYTK SKDRLVGVQIA KRQAVVNPEN TFFSVKRF IG
151 RRMNEVAEES KQVSYRVIKD ENGNVKLDCP AIGKQFAAEE ISAQVLRKLV
201 DDASRFLNDK VTKAVITVPA YFNDSQRTAT KDAGR IAGLE VLRIINEPTA
251 ASLAYGFERK SNETILVFDL GGGTFDVSVL EVGDGVFEVL STSGDTHLGG
301 DDFDKR VVDW LASTFKDEG IDLLKDKQAL QRLTEAAEKA KIELSSLTQT
351 NMSLPFITAT ADGPKHIETT LTRGKFEELC SDLLDRVR TP VENSLRDAKL
401 SFKDIDEVIL VGGSTRIPAV QDLVRKLTGK EPNVSVNPDE VVALGAAVQA
451 GVLSGDVSDI VLLDVTPLSL GLETLGGVMT KIIPRNTTLP TSK SEVFSTA
501 ADGQTSVEIN VLQGEREFVR DNKSIGSFRL DGIPPAPRGV PQIEVKFDID
551 ANGILSVSAS DKGTGKKQDI TITGASTLPK DEVD TMVQEA ERFAKEDKEK
601 RDAIDTKNQA DSVVYQTEKQ LKELGEKIPG PVKEKVEAKL QELKEK IASG
651 STQEIKDTMA ALNQEVMQIG QSLYNQPQPG GADSPPGGEA SSSSDTSSSA
701 KGGDNGGDVI DADFTDSN

```

## Matched peptides information:

| Start - End | Observed  | Mr(expt)  | Mr(calc)  | ppm | Miss | Sequence                    |
|-------------|-----------|-----------|-----------|-----|------|-----------------------------|
| 125 - 131   | 728.4366  | 727.4293  | 727.4592  | -41 | 0    | R.LVGQIAK.R                 |
| 133 - 147   | 1736.0425 | 1735.0352 | 1734.9053 | 75  | 1    | R.QAVVNPENTFFSVKR.F         |
| 148 - 152   | 648.4318  | 647.4245  | 647.3867  | 58  | 1    | R.FIGRR.M                   |
| 153 - 161   | 1036.5963 | 1035.5890 | 1035.4542 | 130 | 0    | R.MNEVAEESK.Q               |
| 162 - 166   | 652.4084  | 651.4011  | 651.3340  | 103 | 0    | K.QVSYR.V                   |
| 167 - 176   | 1115.6327 | 1114.6254 | 1114.5982 | 24  | 1    | R.VIKDENGNVK.L              |
| 170 - 184   | 1629.8887 | 1628.8814 | 1628.7828 | 61  | 1    | K.DENGNVKLDCPAIGK.Q         |
| 185 - 197   | 1461.9123 | 1460.9050 | 1460.7623 | 98  | 0    | K.QFAAEEISAQVLR.K           |
| 185 - 198   | 1589.9552 | 1588.9479 | 1588.8573 | 57  | 1    | K.QFAAEEISAQVLRK.L          |
| 198 - 205   | 903.5664  | 902.5591  | 902.4821  | 85  | 1    | R.KLVDDASR.F                |
| 214 - 227   | 1580.9592 | 1579.9519 | 1579.7995 | 97  | 0    | K.AVITVPAYFNDSQR.T          |
| 236 - 243   | 870.6306  | 869.6233  | 869.5334  | 103 | 0    | R.IAGLEVLR.I                |
| 244 - 259   | 1752.0660 | 1751.0587 | 1750.8890 | 97  | 0    | R.IINEPTAASLAYGFER.K        |
| 307 - 316   | 1165.6594 | 1164.6521 | 1164.6179 | 29  | 0    | R.VVDWLASTFK.K              |
| 318 - 327   | 1145.6543 | 1144.6470 | 1144.5975 | 43  | 1    | K.DEGIDLLKDK.Q              |
| 328 - 332   | 615.4082  | 614.4009  | 614.3500  | 83  | 0    | K.QALQR.L                   |
| 366 - 373   | 970.6167  | 969.6094  | 969.5243  | 88  | 0    | K.HIETTLTR.G                |
| 389 - 396   | 915.5648  | 914.5575  | 914.4821  | 82  | 0    | R.TPVENSLR.D                |
| 400 - 416   | 1849.1702 | 1848.1629 | 1847.9993 | 89  | 1    | K.LSFKDIDEVILVGGSTR.I       |
| 404 - 416   | 1373.8522 | 1372.8449 | 1372.7198 | 91  | 0    | K.DIDEVILVGGSTR.I           |
| 417 - 425   | 1010.6926 | 1009.6853 | 1009.5920 | 92  | 0    | R.IPAVQDLVR.K               |
| 494 - 516   | 2437.3228 | 2436.3155 | 2436.1769 | 57  | 0    | K.SEVFSTAADGQTSVEINVLQGER.E |
| 517 - 523   | 907.5413  | 906.5340  | 906.4559  | 86  | 1    | R.EFVRDNK.S                 |
| 524 - 529   | 666.4117  | 665.4045  | 665.3497  | 82  | 0    | K.SIGSFR.L                  |
| 581 - 592   | 1421.7814 | 1420.7741 | 1420.6140 | 113 | 0    | K.DEVDTMVQEAER.F            |
| 647 - 656   | 1033.6062 | 1032.5989 | 1032.5451 | 52  | 0    | K.IASGSTQEIK.D              |

Spot No.: **163**

Mascot score: **110**    Sequence coverage %: **31**

NCBI accession No.: **gi| 116059538**

Matched peptides No.: **23**

Total peptides No.: **87**

Calculated Mr: **62851**

Calculated pI: **6.32**

### Annotated PMF spectra:

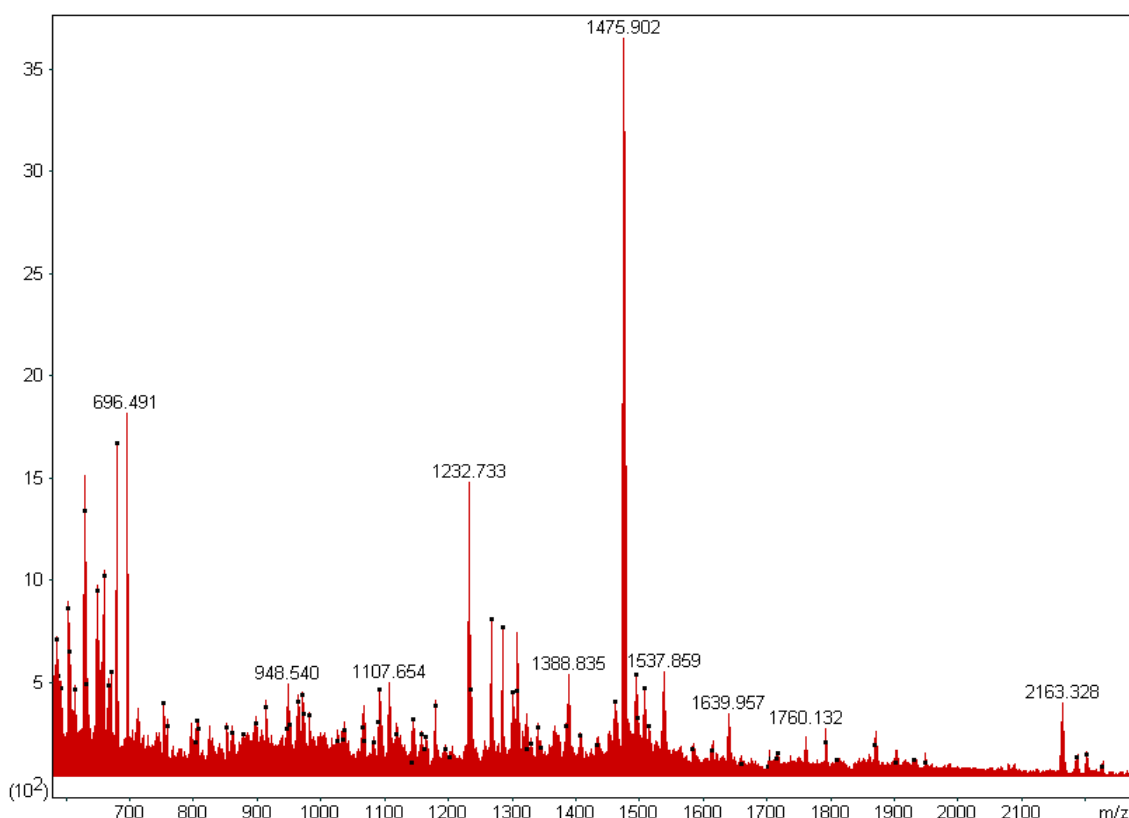

### Probability Based Mowse Score:

Protein score is  $-10 \cdot \log(P)$ , where P is the probability that the observed match is a random event. Protein scores greater than 72 are significant ( $p < 0.05$ ).

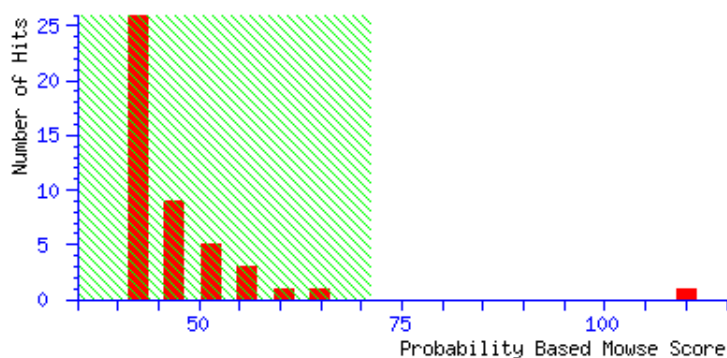

## Matched peptide sequences: shown in **Bold Red**

**1 MRHDEELRAR** FPDAAALDDST MVDDVSIALV RAAIK**ATTSG** RGTVACAARR  
**51 LETDADRALA** AADEKDSARS **SISADGSVSR** EAHELAMLTA AIARSGIRTK  
**101 GDVSYR**IVCA SADSRTLAQ SSTAIEQCSM TVRDANCCVD VAGWTLCCFFT  
**151 ATGWEGEGEN** DLEAALQDAL DADK**VFNQLG** KRTRTVVHRR SRL**KHEGSPT**  
**201 TSNGDGASRV** **ALRR**MNSAEA GESSELEDD SFNGSRERET **SSVERV**GSPS  
**251 LDDCTNIVSD** ING**RELNIGE** **KVSSGSFGAL** **YRGTYSTRSD** **DGTLNRRVVA**  
**301 LKYLK**SVDNG**** **GNF**DARRDF **QEV**RILRKIN HENVIGYVGS VIEGQDLCI  
**351 TEFAGNGNLI** DYMAAKNRPF GTREVAR**ITL** **GIARGMNF** **IH** **EGLKMMHR**DL  
**401 KASNVLLDDS** LTPK**ICDFGL** **ARVM**AKNPGQ MTAETGTYRW MAPEVIGHMQ  
**451 YDYSADVVSF** AILFWELTG GQVPFAELNP LQAAVAVVQR **GMRPEIPRNC**  
**501 DPYLVEIMRK** CWKTAPSARP TFRVLVAMFE AYLDVLPERE **QAE**EKKQRPF  
**551 SKFFRWKQKK** KSCN

## Matched peptides information:

| Start - End | Observed  | Mr(expt)  | Mr(calc)  | ppm  | Miss | Sequence                        |
|-------------|-----------|-----------|-----------|------|------|---------------------------------|
| 3 - 10      | 1025.5611 | 1024.5538 | 1024.5050 | 48   | 1    | R.HDEELRAR.F                    |
| 36 - 41     | 592.2698  | 591.2625  | 591.2976  | -59  | 0    | K.ATTSGR.G                      |
| 70 - 80     | 1065.6386 | 1064.6313 | 1064.5098 | 114  | 0    | R.SSISADGSVSR.E                 |
| 101 - 106   | 696.4911  | 695.4839  | 695.3239  | 130  | 0    | K.GDVSYR.I                      |
| 175 - 181   | 805.4892  | 804.4820  | 804.4494  | 41   | 0    | K.VFNQLGK.R                     |
| 193 - 209   | 1713.9145 | 1712.9072 | 1712.8078 | 58   | 1    | R.LKHEGSPTTSNGDGASR.V           |
| 210 - 214   | 614.2993  | 613.2921  | 613.4024  | -180 | 1    | R.VALRR.M                       |
| 237 - 245   | 1092.6358 | 1091.6285 | 1091.5207 | 99   | 1    | R.ERETSSVER.V                   |
| 239 - 245   | 807.5043  | 806.4970  | 806.3770  | 149  | 0    | R.ETSSVER.V                     |
| 265 - 271   | 802.4881  | 801.4808  | 801.4232  | 72   | 0    | R.ELNIGEK.V                     |
| 272 - 288   | 1809.0076 | 1808.0003 | 1807.8853 | 64   | 1    | K.VSSGSFGALYRGTYSTR.S           |
| 289 - 296   | 877.3896  | 876.3823  | 876.3937  | -13  | 0    | R.SDDGTLNR.R                    |
| 289 - 297   | 1033.6057 | 1032.5984 | 1032.4948 | 100  | 1    | R.SDDGTLNRR.V                   |
| 306 - 317   | 1307.7960 | 1306.7887 | 1306.6014 | 143  | 1    | K.SVDNGGNFEDARR.D               |
| 318 - 327   | 1322.7669 | 1321.7596 | 1321.7143 | 34   | 1    | R.DFFQEVRIILR.K                 |
| 378 - 394   | 1870.0325 | 1869.0252 | 1869.0294 | -2   | 1    | R.ITLGIARGMNFIEGLK.M            |
| 385 - 394   | 1145.6779 | 1144.6706 | 1144.5699 | 88   | 0    | R.GMNFIEGLK.M                   |
| 385 - 398   | 1717.0239 | 1716.0166 | 1715.8058 | 123  | 1    | R.GMNFIEGLKMMHR.D Oxidation (M) |
| 395 - 398   | 606.1959  | 605.1886  | 605.2414  | -87  | 0    | K.MMHR.D 2 Oxidation (M)        |
| 415 - 422   | 951.5641  | 950.5568  | 950.4644  | 97   | 0    | K.ICDFGLAR.V                    |
| 491 - 498   | 971.6181  | 970.6108  | 970.5018  | 112  | 0    | R.GMRPEIPR.N Oxidation (M)      |
| 499 - 510   | 1537.8591 | 1536.8518 | 1536.7428 | 71   | 1    | R.NCDPYLVEIMRK.C                |
| 540 - 546   | 861.3691  | 860.3618  | 860.4239  | -72  | 1    | R.EQAEKK.Q                      |

Spot No.: **164**

Mascot score: **181** Sequence coverage %: **58**

NCBI accession No.: **gi| 26450878**

Matched peptides No.: **18**

Total peptides No.: **62**

Calculated Mr: **34325**

Calculated pI: **5.09**

### Annotated PMF spectra:

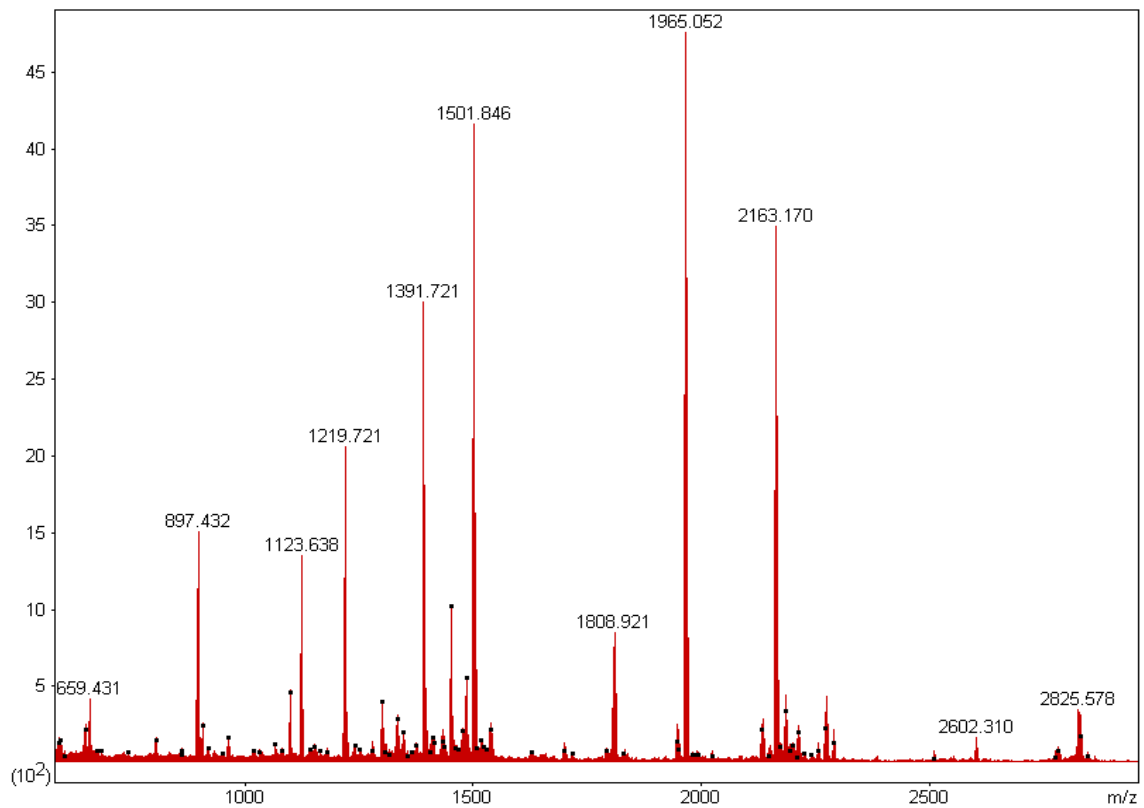

### Probability Based Mowse Score:

Protein score is  $-10 \cdot \log(P)$ , where P is the probability that the observed match is a random event. Protein scores greater than 72 are significant ( $p < 0.05$ ).

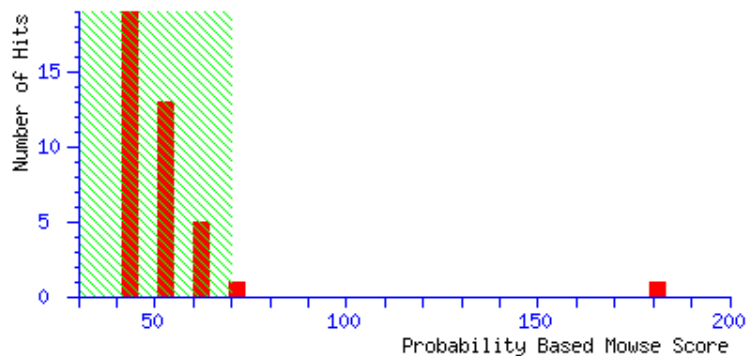



Matched peptide sequences: shown in **Bold Red**

```

1 MTSSNITPRA MATQOLENAD QLIDSVETFI LDCDGVWIKG DKLIEGVPET
51 LDMLRAKGR LVFVTNNSTK SRKQYGKKFE TLGLNVNEEE IFASSFAAAA
101 YLQSINFPKD KKVYVIGEEG ILKELELAGF QYLGGPDDGK RQIELKPGFL
151 MEHDHDVGAV VVGFDRYFNY YKIQYGTLCI RENPGCLFIA TNRDAVTHLT
201 DAQEWAGGGS MVGALVGSTQ REPLVVGKPS TFMMDYLADK FGIQKSQICM
251 VGDRDLTDIL FGQNGGCKTL LVLSGVTSSIS MLESPENKIQ PDFYTSKISD
301 FLSPKAATV

```

Matched peptides information:

| Start - End | Observed  | Mr (expt) | Mr (calc) | ppm | Miss Sequence                                   |
|-------------|-----------|-----------|-----------|-----|-------------------------------------------------|
| 43 - 55     | 1485.8210 | 1484.8137 | 1484.7908 | 15  | 0 K.LIEGVPETLDMLR.A                             |
| 43 - 55     | 1501.8456 | 1500.8383 | 1500.7858 | 35  | 0 K.LIEGVPETLDMLR.A Oxidation (M)               |
| 60 - 70     | 1278.7359 | 1277.7286 | 1277.7092 | 15  | 1 K.RLVFVTNNSTK.S                               |
| 61 - 72     | 1365.7049 | 1364.6976 | 1364.7412 | -32 | 1 R.LVFVTNNSTKR.K                               |
| 112 - 123   | 1347.7600 | 1346.7527 | 1346.7809 | -21 | 1 K.KVYVIGEEGILK.E                              |
| 113 - 123   | 1219.7212 | 1218.7139 | 1218.6860 | 23  | 0 K.VYVIGEEGILK.E                               |
| 124 - 140   | 1808.9207 | 1807.9134 | 1807.8628 | 28  | 0 K.ELELAGFQYLGPPDDGK.R                         |
| 124 - 141   | 1965.0520 | 1964.0447 | 1963.9639 | 41  | 1 K.ELELAGFQYLGPPDDGKR.Q                        |
| 167 - 172   | 897.4318  | 896.4245  | 896.4068  | 20  | 0 R.YFNYYK.I                                    |
| 173 - 181   | 1123.6379 | 1122.6306 | 1122.5856 | 40  | 0 K.IQYGTLCIR.E                                 |
| 182 - 193   | 1391.7209 | 1390.7136 | 1390.6663 | 34  | 0 R.ENPGCLFIATNR.D                              |
| 194 - 221   | 2830.5316 | 2829.5243 | 2829.3352 | 67  | 0 R.DAVTHLTDAGEWAGGSMVGALVGSTQR.E Oxidation (M) |
| 222 - 240   | 2173.1747 | 2172.1674 | 2172.0483 | 55  | 0 R.EPLVVGKPSFMMDYLADK.F 2 Oxidation (M)        |
| 241 - 245   | 592.3954  | 591.3881  | 591.3380  | 85  | 0 K.FGIQK.S                                     |
| 246 - 254   | 1081.5228 | 1080.5155 | 1080.4692 | 43  | 0 K.SQICMVGDR.L Oxidation (M)                   |
| 269 - 288   | 2134.1979 | 2133.1906 | 2133.1239 | 31  | 0 K.TLLVLSGVTSSISMLESPENK.I Oxidation (M)       |
| 289 - 297   | 1098.5612 | 1097.5539 | 1097.5393 | 13  | 0 K.IQPDFYTSK.I                                 |
| 298 - 305   | 906.5189  | 905.5116  | 905.4858  | 28  | 0 K.ISDFLSPK.A                                  |

Spot No.: **165**

Mascot score: **109**    Sequence coverage %: **58**

NCBI accession No.: **gi| 7525040**

Matched peptides No.: **26**

Total peptides No.: **178**

Calculated Mr: **53957**

Calculated pI: **5.38**

### Annotated PMF spectra:

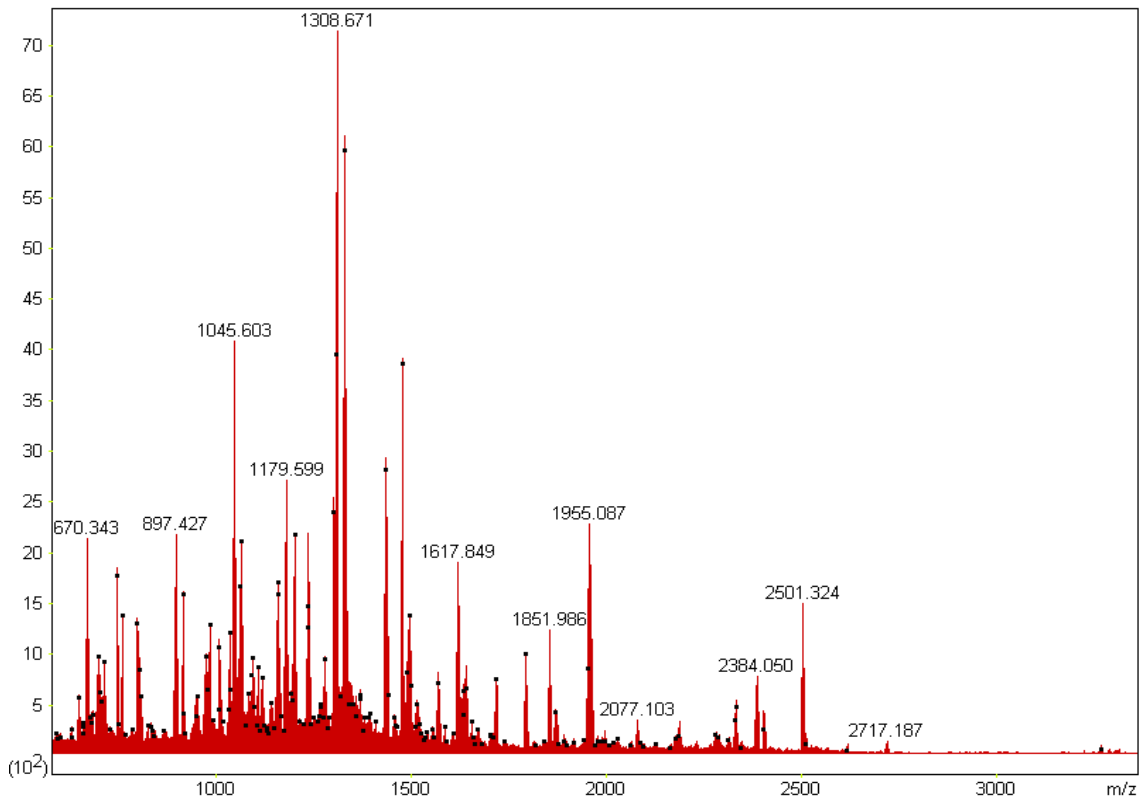

### Probability Based Mowse Score:

Protein score is  $-10 \cdot \log(P)$ , where P is the probability that the observed match is a random event. Protein scores greater than 72 are significant ( $p < 0.05$ ).

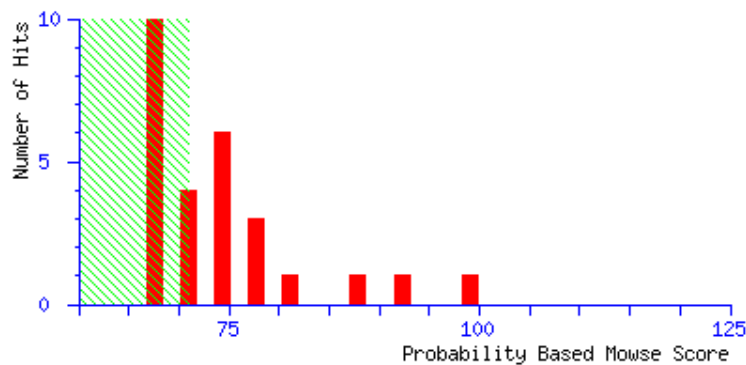

## Matched peptide sequences: shown in **Bold Red**

**1 MRTNPTTNSP EVSIREKKNL** GRIAQIIGPV LDVAFPPGKM **PNIYNALVVK**  
**51 GRDTLGQEIIN VTCEVQQLLG NNRVRAVAMS ATEGLKRGMD VVDMGNPLSV**  
**101 PVGGATLGRIF FNVLGEPVDN LGPVDTRTTS PIHKSAPAFI ELDTKLSIFE**  
**151 TGIKVVDLLA PYRRGGKIGL FGGAGVGKTV LIMELINNIA KAHGGVSVFG**  
**201 GVGERTREGN DLYMEMKESG VINEQNLAES KVALVYGQMN EPPGARMRVG**  
**251 LTAL TMAEYF RDVNEQDVLL FIDNIFRFVQ AGSEVSALLG RMPSAVGYQP**  
**301 TLSTEMGTLQ ERITSTKKGS ITSIQAVYVP ADDLTDPAFA TTF AHLDATT**  
**351 VLSRGLAAKG IYPAVDPLDS TSTMLQPRIV GEEHYETAQQ VKQTLQR.YKE**  
**401 LQDIIAILGL DELSEEDRLT VARARKIERF LSQPFVFAEV FTGSPGKYVG**  
**451 LAETIRGFNL ILSGEFDSLP EQAFYLVGNI DEATAKATNL EMESKLLK**

## Matched peptides information:

| Start - End | Observed  | Mr(expt)  | Mr(calc)  | ppm | Miss Sequence                                 |
|-------------|-----------|-----------|-----------|-----|-----------------------------------------------|
| 1 - 15      | 1702.8993 | 1701.8920 | 1701.8468 | 27  | 1 -.MRTNPTTNSPEVSIR.E                         |
| 18 - 22     | 587.3671  | 586.3598  | 586.3551  | 8   | 1 K.KNLGR.I                                   |
| 40 - 50     | 1277.6726 | 1276.6653 | 1276.6849 | -15 | 0 K.MPNIYNALVVK.G Oxidation (M)               |
| 51 - 73     | 2614.3503 | 2613.3430 | 2613.2929 | 19  | 1 K.GRDTLGQEIINVTCEVQQLGNRR.V                 |
| 53 - 73     | 2401.2487 | 2400.2414 | 2400.1703 | 30  | 0 R.DTLGQEIINVTCEVQQLGNRR.V                   |
| 76 - 87     | 1249.6223 | 1248.6150 | 1248.6496 | -28 | 1 R.AVAMSATEGLKR.G Oxidation (M)              |
| 87 - 109    | 2330.2193 | 2329.2120 | 2329.1519 | 26  | 1 K.RGMDVVDMGNPLSVPVGGATLGR.I 2 Oxidation (M) |
| 88 - 109    | 2174.1402 | 2173.1329 | 2173.0508 | 38  | 0 R.GMDVVDMGNPLSVPVGGATLGR.I 2 Oxidation (M)  |
| 110 - 127   | 1955.0870 | 1954.0797 | 1954.0160 | 33  | 0 R.IFNVLGEPVDNLGPVDTR.T                      |
| 128 - 134   | 783.4099  | 782.4026  | 782.4286  | -33 | 0 R.TTSPHK.S                                  |
| 146 - 154   | 1007.5456 | 1006.5383 | 1006.5699 | -31 | 0 K.LSIFETGK.V                                |
| 155 - 163   | 1045.6027 | 1044.5954 | 1044.5968 | -1  | 0 K.VVDLLAPYR.R                               |
| 155 - 164   | 1201.6779 | 1200.6706 | 1200.6979 | -23 | 1 K.VVDLLAPYRR.G                              |
| 168 - 178   | 975.5296  | 974.5223  | 974.5549  | -33 | 0 K.IGLFGGAGVGK.T                             |
| 192 - 205   | 1328.6974 | 1327.6901 | 1327.6633 | 20  | 0 K.AHGGVSVFVGGER.T                           |
| 206 - 217   | 1518.7435 | 1517.7362 | 1517.6490 | 57  | 1 R.TREGNDLYMEMK.E 2 Oxidation (M)            |
| 232 - 246   | 1617.8494 | 1616.8421 | 1616.7981 | 27  | 0 K.VALVYGQMNPEPPGAR.M Oxidation (M)          |
| 249 - 261   | 1487.7927 | 1486.7854 | 1486.7490 | 25  | 0 R.VGLTAL TMAEYFR.D Oxidation (M)            |
| 262 - 277   | 1950.0415 | 1949.0342 | 1948.9894 | 23  | 0 R.DVNEQDVLLFIDNIFR.F                        |
| 278 - 291   | 1433.7987 | 1432.7914 | 1432.7674 | 17  | 0 R.FVQAGSEVSALLGR.M                          |
| 292 - 312   | 2328.1795 | 2327.1722 | 2327.0773 | 41  | 0 R.MPSAVGYQPTLSTEMGTLQER.I 2 Oxidation (M)   |
| 355 - 378   | 2501.3239 | 2500.3166 | 2500.2995 | 7   | 1 R.GLAARKIYPAVDPLDSTSTMLQPR.I                |
| 360 - 378   | 2061.1146 | 2060.1073 | 2060.0248 | 40  | 0 K.GIYPAVDPLDSTSTMLQPR.I                     |
| 360 - 378   | 2077.1026 | 2076.0953 | 2076.0198 | 36  | 0 K.GIYPAVDPLDSTSTMLQPR.I Oxidation (M)       |
| 379 - 392   | 1630.8577 | 1629.8504 | 1629.7998 | 31  | 0 R.IVGEHYETAQQVK.Q                           |
| 393 - 397   | 645.3808  | 644.3735  | 644.3606  | 20  | 0 K.QLQR.Y                                    |

Spot No.: **166**

Mascot score: **128**    Sequence coverage %: **32**

NCBI accession No.: **gi| 21537360**

Matched peptides No.: **14**

Total peptides No.: **27**

Calculated Mr: **39459**

Calculated pI: **6.97**

### Annotated PMF spectra:

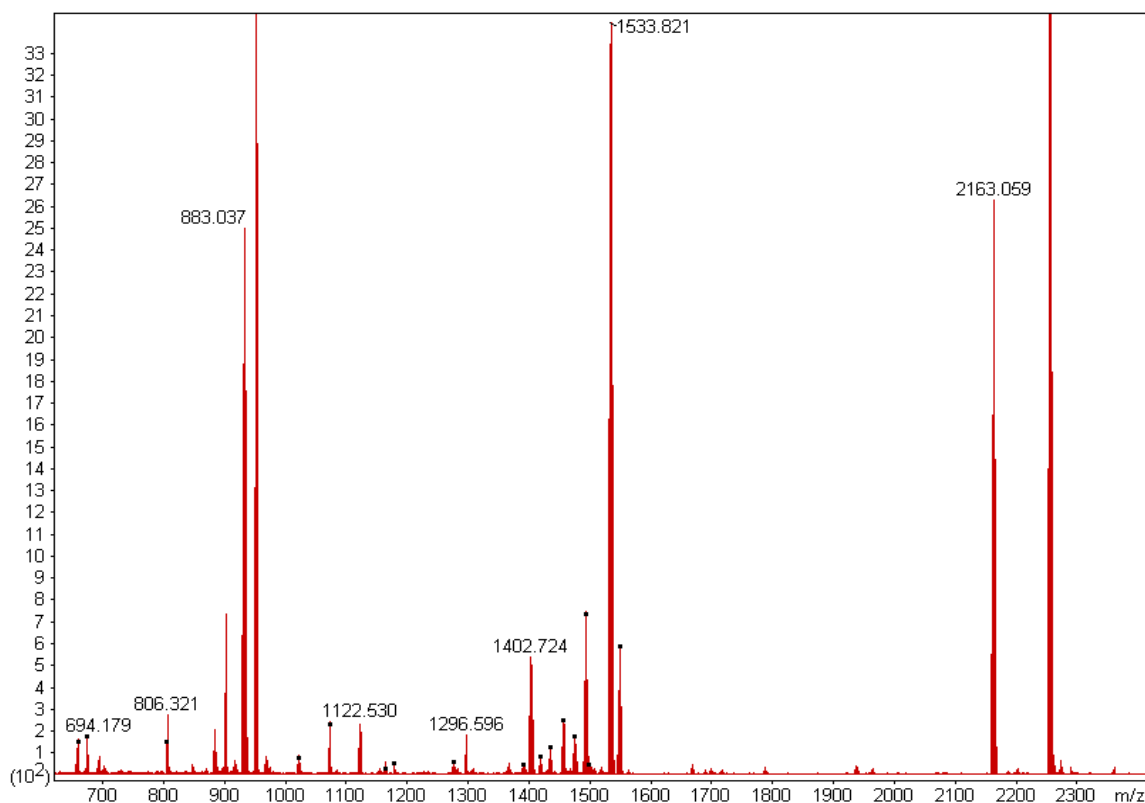

### Probability Based Mowse Score:

Protein score is  $-10 \cdot \log(P)$ , where P is the probability that the observed match is a random event. Protein scores greater than 72 are significant ( $p < 0.05$ ).

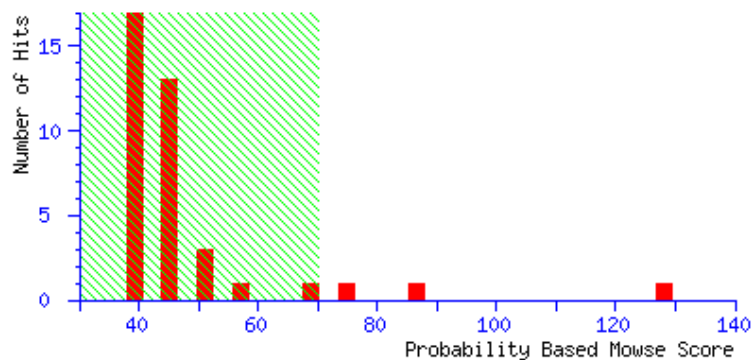

Matched peptide sequences: shown in **Bold Red**

**1** MVRIIPMAAS SIRPSLACFS DSPR**FPISLL SRNLSRTLHV** PQSQLFGLTS  
**51** HKLLRRSVNC LGVAESGKAA QSTTQDDLLT WVKNDK**RML HVVYRV**GDMD  
**101** RTIK**FYTECL GMKLLRKRDI** PEEKYTNAFL GYGPEDSHFV IELTYNYGVD  
**151** KYDIGAGFGH FGIAVDDVAK TVELVKAKGG **KVSREPGPVK** GGK**TVIAFIE**  
**201** **DPDGYKFELL ERGPTPEPLC** QVMLR**VGDL** **RAIKFYEKAF GMELLTRDN**  
**251** **PEYKYTIAMM GYGPEDKFPV** LELTYNYGVT EYDKGNAYAQ ISIGTDDVYK  
**301** TAEAIKLFGG KITREPGPLP GISTK**ITACL** **DPDGWKS**VFV **DNIDFLKELE**  
**351**

Matched peptides information:

| Start - End | Observed  | Mr(expt)  | Mr(calc)  | ppm  | Miss Sequence                 |
|-------------|-----------|-----------|-----------|------|-------------------------------|
| 25 - 36     | 1402.7240 | 1401.7167 | 1401.8092 | -66  | 1 R.FPISLLSRNLSR.T            |
| 88 - 95     | 1073.4019 | 1072.3946 | 1072.5964 | -188 | 1 R.RMLHVYR.V                 |
| 89 - 95     | 917.4062  | 916.3990  | 916.4953  | -105 | 0 R.MLHVYR.V                  |
| 89 - 95     | 933.3959  | 932.3887  | 932.4902  | -109 | 0 R.MLHVYR.V Oxidation (M)    |
| 105 - 113   | 1164.4500 | 1163.4427 | 1163.4991 | -48  | 0 K.FYTECLGMK.L Oxidation (M) |
| 182 - 190   | 968.4315  | 967.4242  | 967.5451  | -125 | 1 K.VSREPGPVK.G               |
| 194 - 212   | 2255.1875 | 2254.1802 | 2254.1521 | 12   | 1 K.TVIAFIEDPDGYKFELLER.G     |
| 207 - 212   | 806.3209  | 805.3136  | 805.4334  | -149 | 0 K.FELLER.G                  |
| 226 - 231   | 674.2248  | 673.2176  | 673.3395  | -181 | 0 R.VGDLDR.A                  |
| 239 - 246   | 952.4013  | 951.3940  | 951.4848  | -95  | 0 K.AFGMELLR.T Oxidation (M)  |
| 247 - 254   | 1022.4218 | 1021.4145 | 1021.4828 | -67  | 1 R.TRDNPEYK.Y                |
| 255 - 267   | 1475.7058 | 1474.6985 | 1474.6472 | 35   | 0 K.YTIAMMGYGPEDK.F           |
| 326 - 336   | 1275.5213 | 1274.5140 | 1274.5965 | -65  | 0 K.ITACLDPDGWK.S             |
| 337 - 347   | 1296.5965 | 1295.5892 | 1295.6762 | -67  | 0 K.SVFVDNIDFLK.E             |

Spot No.: **167**

Mascot score: **168**    Sequence coverage %: **46**

NCBI accession No.: **gi| 15239061**

Matched peptides No.: **15**

Total peptides No.: **33**

Calculated Mr: **30685**

Calculated pI: **4.99**

### Annotated PMF spectra:

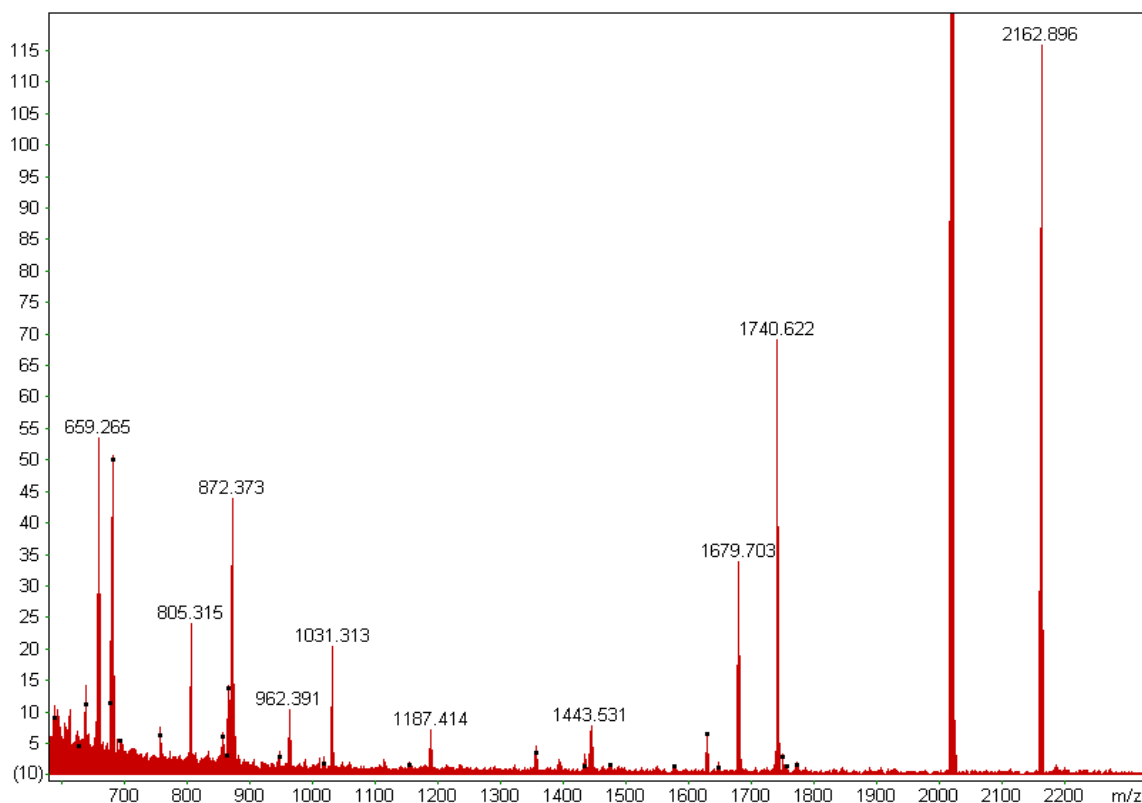

### Probability Based Mowse Score:

Protein score is  $-10 \cdot \log(P)$ , where P is the probability that the observed match is a random event.  
Protein scores greater than 72 are significant ( $p < 0.05$ ).

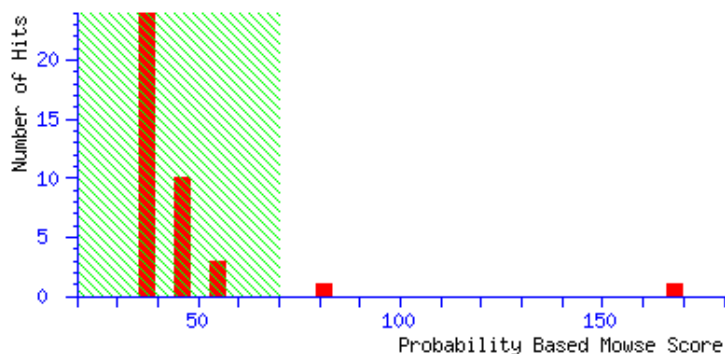

Matched peptide sequences: shown in **Bold Red**

**1** MFR**NQYD****TDV** **TTWSPTGR****LF** **QVEYAMEAVK** **QGSAAIGLR****S** RSHVVLACVN  
**51** KAQSELSSHQ RKIF**KVDDHI** **GVAIAGLTAD** **GRVLSRYMRS** **ESINHSFTYE**  
**101** **SPLPVGR****LVV** HLAD**KAQVCT** **QRSWKR****PYGV** GLLVGG**LD****ES** GAHLYY**NCPS**  
**151** GNYFEYQAF**A** IGSRSQA**AKT** **YLERRFESFG** **DSSREDLIK****D** **AILAVRET****LQ**  
**201** **GETLK****SSLCT** VAILGVDE**PF** HFLDQEA**IQK** VIDTFEK**VPE** EEEGE**GEAGE**  
**251** GEAEAAEA**AP** AER**GGGVAGD** **QDVAPMEM**

Matched peptides information:

| Start - End | Observed  | Mr(expt)  | Mr(calc)  | ppm  | Miss | Sequence                                |
|-------------|-----------|-----------|-----------|------|------|-----------------------------------------|
| 4 - 18      | 1740.6225 | 1739.6152 | 1739.7751 | -92  | 0    | R.NQYD <b>TDVTTWSPTGR</b> .L            |
| 19 - 30     | 1443.5313 | 1442.5240 | 1442.7115 | -130 | 0    | R.LF <b>QVEYAMEAVK</b> .Q Oxidation (M) |
| 31 - 39     | 872.3729  | 871.3657  | 871.4875  | -140 | 0    | K.QGSAAIG <b>LR</b> .S                  |
| 66 - 82     | 1679.7027 | 1678.6954 | 1678.8639 | -100 | 0    | K.VDDHIG <b>VAIAGLTADGR</b> .V          |
| 90 - 107    | 2019.8128 | 2018.8055 | 2018.9698 | -81  | 0    | R.SESINHSFT <b>YESPLVGR</b> .L          |
| 116 - 122   | 862.3057  | 861.2984  | 861.4127  | -133 | 0    | K.A <b>QVCTQR</b> .S                    |
| 170 - 174   | 681.2474  | 680.2401  | 680.3493  | -161 | 0    | K.TYLER. <b>R</b>                       |
| 175 - 184   | 1187.4136 | 1186.4063 | 1186.5367 | -110 | 1    | R.RFESFGD <b>SSR</b> .E                 |
| 176 - 184   | 1031.3127 | 1030.3054 | 1030.4356 | -126 | 0    | R.FESFGD <b>SSR</b> .E                  |
| 176 - 189   | 1629.5785 | 1628.5712 | 1628.7682 | -121 | 1    | R.FESFGD <b>SSREDLIK</b> .D             |
| 185 - 196   | 1355.6527 | 1354.6454 | 1354.7820 | -101 | 1    | R.EDLIK <b>DAILAVR</b> .E               |
| 190 - 196   | 757.2913  | 756.2840  | 756.4494  | -219 | 0    | K.DAILAVR. <b>E</b>                     |
| 190 - 205   | 1756.5701 | 1755.5628 | 1755.9730 | -234 | 1    | K.DAILAVRET <b>LQGETLK</b> .S           |
| 197 - 205   | 1018.4001 | 1017.3928 | 1017.5342 | -139 | 0    | R.ET <b>LQGETLK</b> .S                  |
| 264 - 278   | 1433.5762 | 1432.5689 | 1432.5963 | -19  | 0    | R.GGGVAG <b>DQDVAPMEM</b> .-            |

Spot No.: **168**

Mascot score: **96**    Sequence coverage %: **33**

NCBI accession No.: **gi| 15220151**

Matched peptides No.: **8**

Total peptides No.: **29**

Calculated Mr: **30619**

Calculated pI: **4.97**

### Annotated PMF spectra:

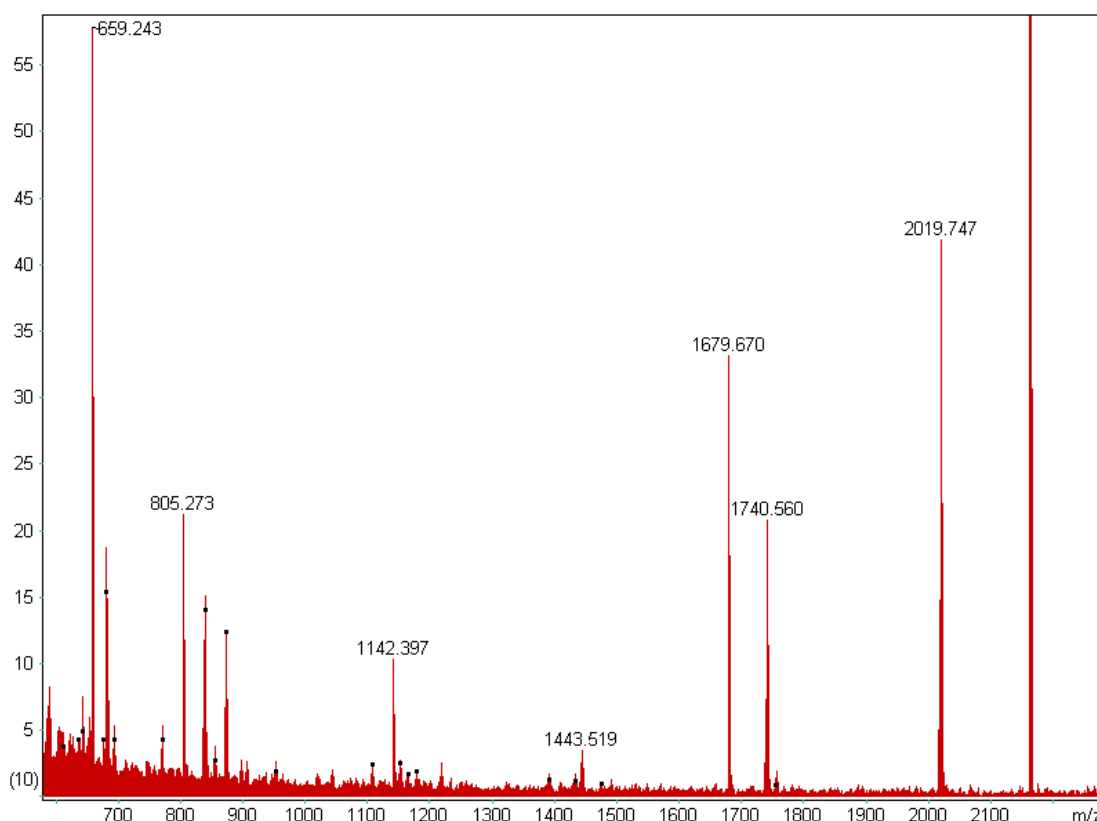

### Probability Based Mowse Score:

Protein score is  $-10 \cdot \log(P)$ , where P is the probability that the observed match is a random event. Protein scores greater than 72 are significant ( $p < 0.05$ ).

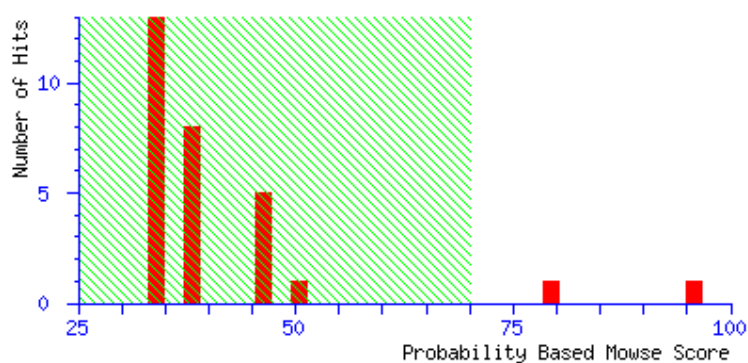



Matched peptide sequences: shown in **Bold Red**

**1** MFR**NQYD**TDV **TTWSPTGR**LF **QVEYAMEAVK** **QGSAAI**GLRS RSHVVLACVN  
**51** **KAQSEL**SSHQ RKIFKV**DDHI** **GVAIAG**L**TAD** **GRVLSRYMRS** **ESINHS**F**TYE**  
**101** **SPLPVGR**LVV H**LADKAQ**VCT QRSWKR**PYGV** GLLV**GGLDES** GAHLY**NCPS**  
**151** GNYFEY**QAFA** IGSRS**QAAKT** **YLERK**F**FESFQ** ESSK**EDLIK**D **DAI**RE**T**LQ  
**201** GETLK**SSLCT** VSVL**GVDEPF** HFLD**QESIQK** VIDT**FEKVPE** EEED**AGEGEA**  
**251** EPEA**APGAAG** TGE**QGGSGDQ** DVAP**MEI**

Matched peptides information:

| Start - End | Observed  | Mr(expt)  | Mr(calc)  | ppm  | Miss | Sequence                                |
|-------------|-----------|-----------|-----------|------|------|-----------------------------------------|
| 4 - 18      | 1740.5595 | 1739.5522 | 1739.7751 | -128 | 0    | R.NQYD <b>TDVTTWSPTGR</b> .L            |
| 19 - 30     | 1443.5189 | 1442.5116 | 1442.7115 | -139 | 0    | R.LF <b>QVEYAMEAVK</b> .Q Oxidation (M) |
| 31 - 39     | 872.3471  | 871.3398  | 871.4875  | -169 | 0    | K. <b>QGSAAI</b> GLR.S                  |
| 52 - 61     | 1142.3970 | 1141.3897 | 1141.5476 | -138 | 0    | K. <b>AQSEL</b> SSHQR.K                 |
| 66 - 82     | 1679.6700 | 1678.6627 | 1678.8639 | -120 | 0    | K.V <b>DDHIGVAIAG</b> L <b>TADGR</b> .V |
| 90 - 107    | 2019.7471 | 2018.7398 | 2018.9698 | -114 | 0    | R.S <b>ESINHS</b> F <b>TYESPLVGR</b> .L |
| 170 - 174   | 681.2157  | 680.2084  | 680.3493  | -207 | 0    | K. <b>TYLER</b> .K                      |
| 190 - 196   | 805.2726  | 804.2654  | 804.4164  | -188 | 0    | K. <b>DAI</b> MAIR.E Oxidation (M)      |

Spot No.: **169**

Mascot score: **94**

Sequence coverage %: **15**

NCBI accession No.: **gi| 225461150**

Matched peptides No.: **12**

Total peptides No.: **33**

Calculated Mr: **86688**

Calculated pI: **6.66**

### Annotated PMF spectra:

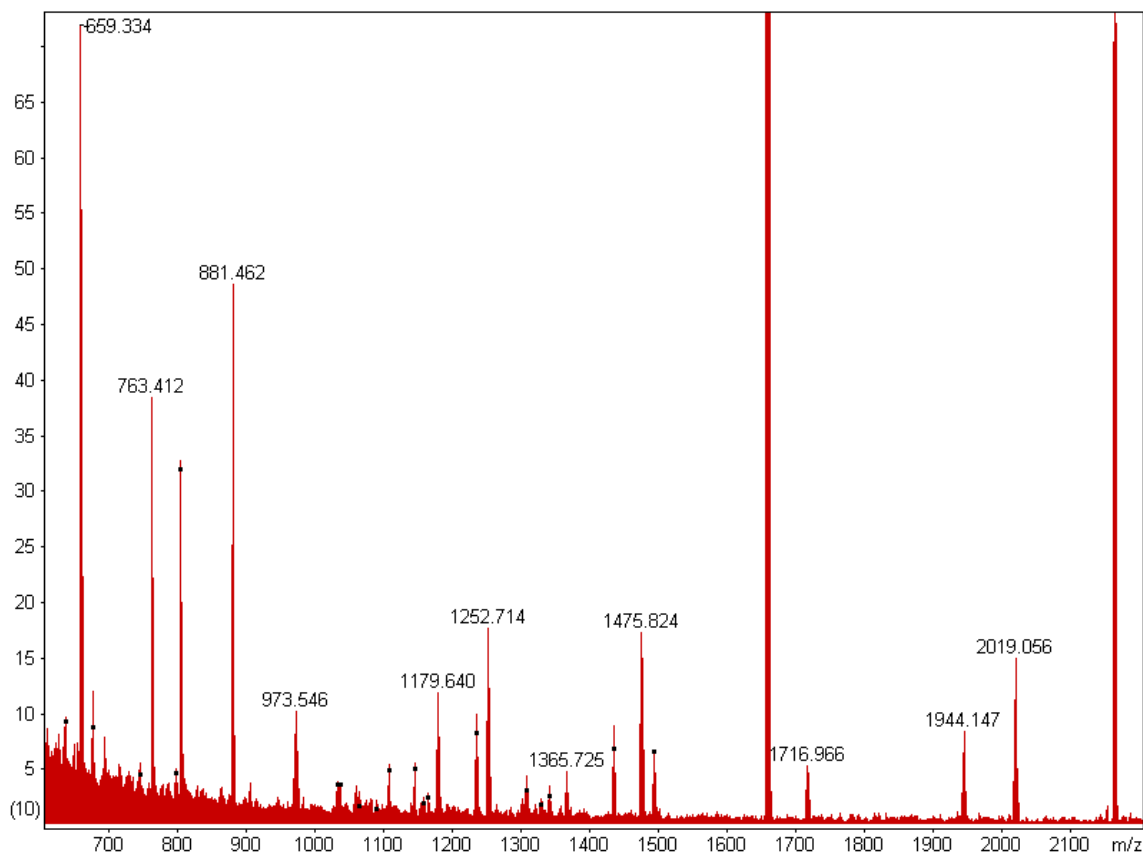

### Probability Based Mowse Score:

Protein score is  $-10 \cdot \log(P)$ , where P is the probability that the observed match is a random event. Protein scores greater than 72 are significant ( $p < 0.05$ ).

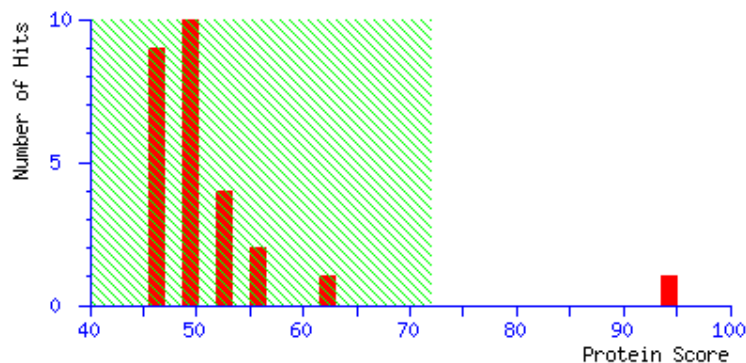

Matched peptide sequences: shown in **Bold Red**

```

1  MVGPANSGRT RQAFSVVNGG QENGGPPSSA GSECGGIEFT KEDVEALLNE
51 KMKGKNKFNL KEKCDQMMDY IRKLRLCIKW FQELEGSYLL EQEKLRLNMLD
101 CAERKCNELE VLMKNKEEL NSIIMELRKN CASLHEKLTK ESEKLAAMD
151 SLTREKEARL AAERLQTSLT DELGKAQREH LSASQKITSL NDMYKRLQEY
201 NTSLQQYNSK LQTELPTVNE ALKRVEKEKA AVVENLSTLR GHYNALQDQF
251 TLTRASQDEA MKQREALVND VVCLRGELQQ ARDDRDRYLS QVEVLTTEVV
301 KYKECTGKSF AELENLSLKS NELEARCLSQ SDQIKALQDK LGAAEKKLQV
351 SDLSAMETRT EYEEQKKLIH DLQNRLADAE IKIIEGEKLR KKLHNTILEL
401 KGNIRVFCRV RPLLADDSAA EAKVISYPTS TEFFGRGIDL MQSGQKHSFT
451 FDKVFMPDAP QQEVFVEISQ LVQSALDGYK VCIFAYGQTG SGKTHMTMGR
501 PGNPEQGLI PRSLEQIFET RQSLKSQGWK YEMQVSMLEI YNETIRDLLS
551 TNRSCSDVSR TENGVAGKQY AIKHDGNGNT HVSDLTVVVDV RSTREVSFLL
601 DQAAQSRSVG KTQMNEQSSR SHFVFTLRIS GVNESTEQQV QGVNLNIDLA
651 GSERLSKSGS TGDRLKETQA INKSLSSLSL VIFALAKKED HVPFRNSKLT
701 YLLQPCLGGD SKTLMFVNIS PDPSSSLGESL CSLRFAARVN ACEIGIPRQ
751 TNMRPSDSRL SYG

```

Matched peptides information:

| Start - End | Observed  | Mr (expt) | Mr (calc) | ppm | Miss Sequence                     |
|-------------|-----------|-----------|-----------|-----|-----------------------------------|
| 1 - 11      | 1145.5746 | 1144.5673 | 1144.5771 | -9  | 1 -.MVGPANSGRTR.Q                 |
| 42 - 53     | 1434.8466 | 1433.8393 | 1433.7072 | 92  | 1 K.EDVEALLNEKMK.G Oxidation (M)  |
| 56 - 61     | 763.4122  | 762.4049  | 762.4388  | -44 | 1 K.NKFNLK.E                      |
| 117 - 128   | 1475.8236 | 1474.8163 | 1474.7337 | 56  | 0 K.EEELNSIIMELR.K                |
| 146 - 156   | 1234.6996 | 1233.6923 | 1233.6387 | 43  | 1 K.LAAMD <del>SL</del> TREK.E    |
| 255 - 264   | 1179.6400 | 1178.6327 | 1178.5350 | 83  | 1 R.ASQDEAMKQR.E Oxidation (M)    |
| 347 - 359   | 1493.8309 | 1492.8236 | 1492.7555 | 46  | 1 K.KLQVSDLSAMETR.T Oxidation (M) |
| 348 - 359   | 1365.7246 | 1364.7173 | 1364.6606 | 42  | 0 K.LQVSDLSAMETR.T Oxidation (M)  |
| 447 - 453   | 881.4618  | 880.4545  | 880.4079  | 53  | 0 K.HSFTFDK.V                     |
| 508 - 521   | 1658.9956 | 1657.9883 | 1657.9151 | 44  | 1 K.GLIPRSLEQIFETR.Q              |
| 531 - 546   | 2019.0557 | 2018.0484 | 2017.9489 | 49  | 0 K.YEMQVSMLEIYNETIR.D            |
| 749 - 754   | 805.4046  | 804.3973  | 804.4024  | -6  | 1 R.RQTNMR.P                      |

Spot No.: **170**

Mascot score: **84**    Sequence coverage %: **21**

NCBI accession No.: **gi| 15240013**

Matched peptides No.: **6**

Total peptides No.: **10**

Calculated Mr: **35349**

Calculated pI: **5.55**

### Annotated PMF spectra:

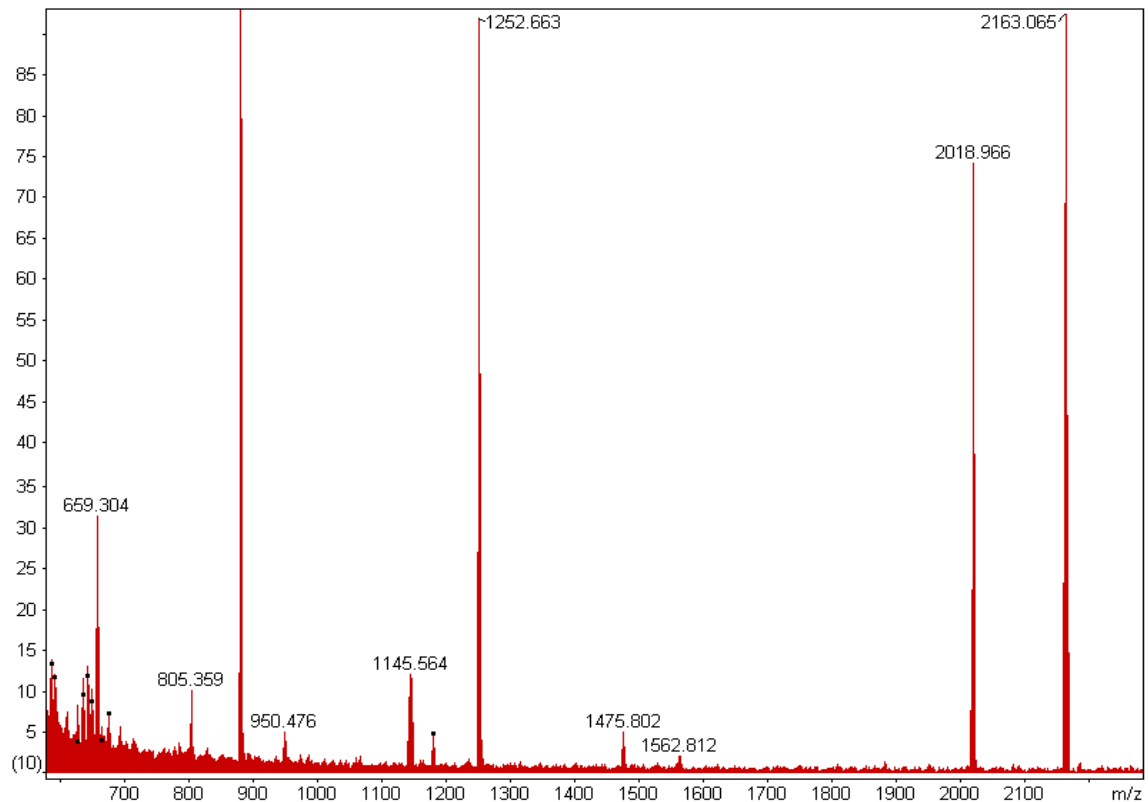

### Probability Based Mowse Score:

Protein score is  $-10 \cdot \log(P)$ , where P is the probability that the observed match is a random event. Protein scores greater than 72 are significant ( $p < 0.05$ ).

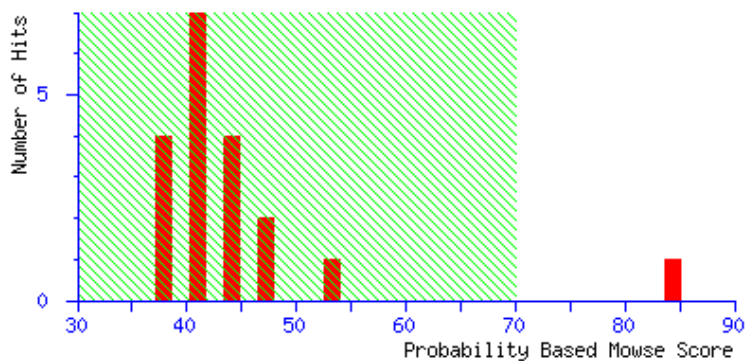

Matched peptide sequences: shown in **Bold Red**

1 MAASLQSTAT FLQSAKIATA PSRGSSHLRS TQAVGKSFGL ETSSARLTCS  
51 FQSDFKDFTG KCSDAVKIAG FALATSALVV SGASAEGAPK **RLTYDEIQSK**  
101 TYMEVKGTGT ANQCPTIDGG SETFSFKPGK YAGKKFCFEP TSFTVKADSV  
151 SK**NAPPEFQN** **TKLM**TRLTYT LDEIEGPFV ASDGSVNFKE **EDGIDYAAVT**  
201 **VQLP**GGERP **FLFTVK**QLDA SGKPDSFTGK **FLVPSYR**GSS FLDPKGRGGS  
251 **TGYD**NAVALP **AGGR**GDEEEL VKENVKNTAA SVGEITLKVT KSKPETGEVI  
301 GVFE**SLQ**PSD TDLGAKV**PKD** VKIQGVWY**Q** LE

Matched peptides information:

| Start | End | Observed  | Mr(expt)  | Mr(calc)  | ppm | Miss | Sequence               |
|-------|-----|-----------|-----------|-----------|-----|------|------------------------|
| 91    | 100 | 1252.6627 | 1251.6554 | 1251.6459 | 8   | 1    | K.RLTYDEIQSK.T         |
| 153   | 162 | 1145.5645 | 1144.5572 | 1144.5513 | 5   | 0    | K.NAPPEFQNTK.L         |
| 190   | 208 | 2018.9656 | 2017.9583 | 2017.9593 | -0  | 0    | K.EEDGIDYAAVTVQLPGER.V |
| 209   | 216 | 950.4765  | 949.4692  | 949.5637  | -99 | 0    | R.VPFLTVK.Q            |
| 231   | 237 | 881.4463  | 880.4390  | 880.4807  | -47 | 0    | K.FLVPSYR.G            |
| 248   | 264 | 1562.8119 | 1561.8046 | 1561.7485 | 36  | 0    | R.GGSTGYDNAVALPAGGR.G  |

Spot No.: 171

Mascot score: 119 Sequence coverage %: 29

NCBI accession No.: gi| 49359169

Matched peptides No.: 9

Total peptides No.: 18

Calculated Mr: 37078

Calculated pI: 6.78

### Annotated PMF spectra:

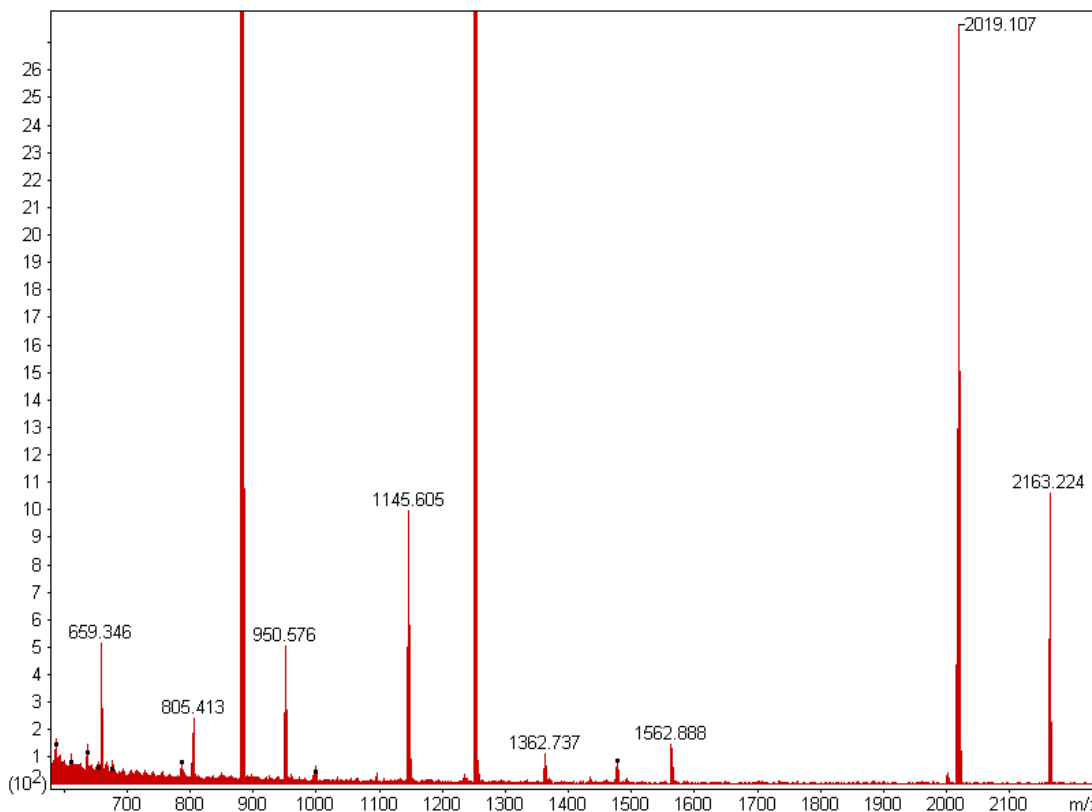

### Probability Based Mowse Score:

Protein score is  $-10 \cdot \log(P)$ , where P is the probability that the observed match is a random event. Protein scores greater than 72 are significant ( $p < 0.05$ ).

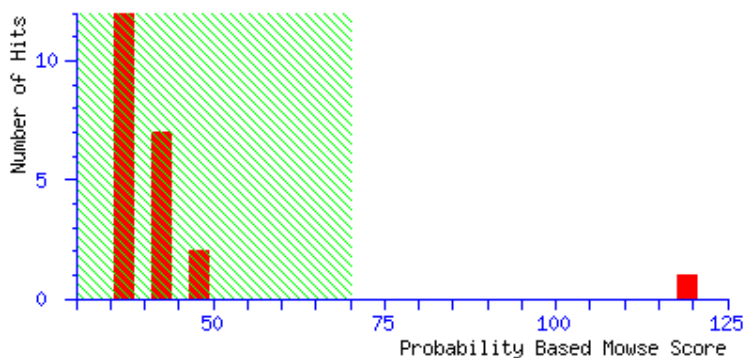

Matched peptide sequences: shown in **Bold Red**

```

1 MGRKKLELSE RHSVAMAASL QSAATFFQSA KISTAPSRGS AHLRSAQTVG
51 KSFGLLETSSA RLTCYQSDI KDFAGKCSDA VKIAGFALAT SALVVSGASA
101 EGAPKRLTYD EIQSKTYMEV KGTGTANQCP TIDGGSETFS FKPGKYAGKK
151 FCFEPTSFTV KAESVSKNAP PEFQNTKLMT RLCTCLDEIE GPFEVSSDGS
201 VNFKEEDGID YAAVTVQLPG GERVPFLFTV KQLDASGKPD NFTGKFLVPS
251 YRGPSFLDPK GRGGSTGYDN AVALPAGGRG DEEELSKENV KNTAASVGEI
301 TLKVTKSKPE TGEVIGVFQS LQPSDIDLGA KVPKDVKIQG VWYGOLE

```

Matched peptides information:

| Start - End | Observed  | Mr(expt)  | Mr(calc)  | ppm | Miss | Sequence                 |
|-------------|-----------|-----------|-----------|-----|------|--------------------------|
| 106 - 115   | 1252.7434 | 1251.7361 | 1251.6459 | 72  | 1    | K.RLTYDEIQSK.T           |
| 116 - 121   | 786.3347  | 785.3274  | 785.3629  | -45 | 0    | K.TYMEVK.G Oxidation (M) |
| 151 - 161   | 1362.7367 | 1361.7294 | 1361.6326 | 71  | 0    | K.FCFEPTSFTVK.A          |
| 168 - 177   | 1145.6049 | 1144.5976 | 1144.5513 | 40  | 0    | K.NAPPEFQNTK.L           |
| 205 - 223   | 2019.1073 | 2018.1000 | 2017.9593 | 70  | 0    | K.EEDGIDYAAVTVQLPGGER.V  |
| 224 - 231   | 950.5762  | 949.5689  | 949.5637  | 5   | 0    | R.VPFLFTVK.Q             |
| 232 - 245   | 1477.8415 | 1476.8342 | 1476.7209 | 77  | 0    | K.QLDASGKPDNFTGK.F       |
| 246 - 252   | 881.5084  | 880.5011  | 880.4807  | 23  | 0    | K.FLVPSYR.G              |
| 263 - 279   | 1562.8884 | 1561.8811 | 1561.7485 | 85  | 0    | R.GGSTGYDNAVALPAGGR.G    |

Spot No.: 172

Mascot score: 84 Sequence coverage %: 21

NCBI accession No.: gi| 18408627

Matched peptides No.: 9

Total peptides No.: 22

Calculated Mr: 34680

Calculated pI: 8.31

### Annotated PMF spectra:

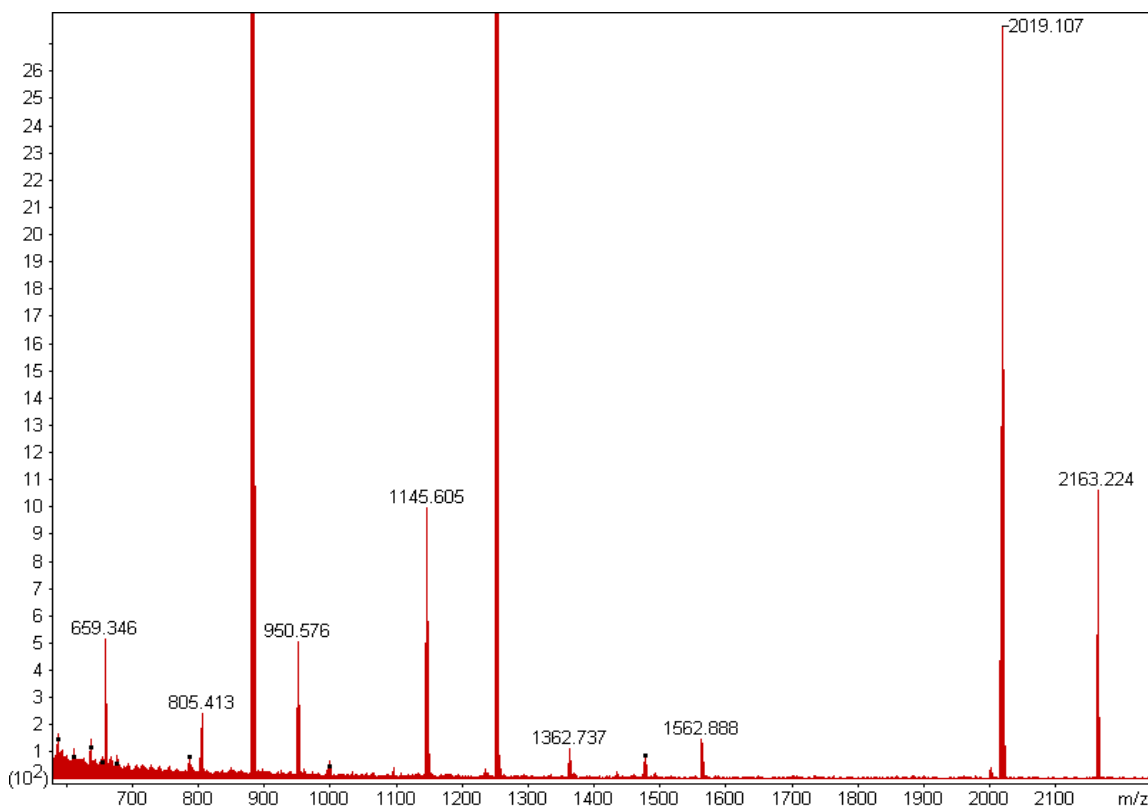

### Probability Based Mowse Score:

Protein score is  $-10 \cdot \log(P)$ , where P is the probability that the observed match is a random event. Protein scores greater than 72 are significant ( $p < 0.05$ ).

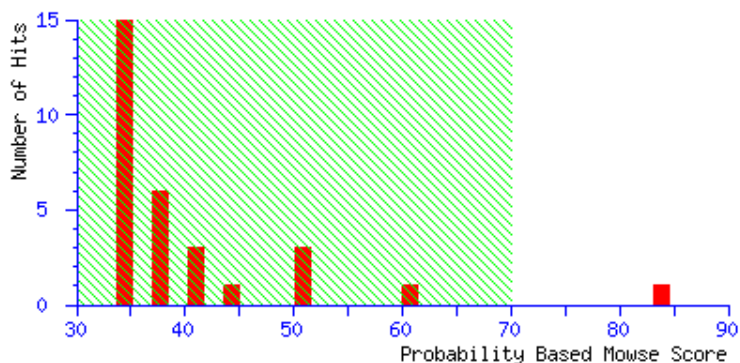



Matched peptide sequences: shown in **Bold Red**

**1** MATVKISLSL ASLSPSSSSS SIQSKLSPSF IPNAAPAKAV KLRFMNGKSLR  
**51** AKPMVYRSSR SVGVTCASASS SLTTLPSALL FDCDGVLDVT EKDGHR**ISFN**  
**101** **DTFKER**DLNV TWDVDLYGEL LKIGGGKERM **TAYFNK**VGWPEKAPK**DEAER**  
**151** **KEFIAGLHKQ** **KTELFMVLIE** **KLLPLRPGV** **AKLVDQALTN** GVKVAVCSTS  
**201** NEK**AVSAIVS** **CLLGP**ERAEK IKIFAGDVVP **KKKPDPAIYN** LAAETLGVDP  
**251** SKCVVVEDSA IGLAAAKAAG MTCIVTKSGY TADEFENAD AVFDCIGDPP  
**301** EERFDLAFCG SLLRKQFVS

Matched peptides information:

| Start - End | Observed  | Mr(expt)  | Mr(calc)  | ppm  | Miss | Sequence                                |
|-------------|-----------|-----------|-----------|------|------|-----------------------------------------|
| 97 - 104    | 971.3330  | 970.3258  | 970.4760  | -155 | 0    | R.ISFN <b>DTFK</b> .E                   |
| 97 - 106    | 1256.4828 | 1255.4755 | 1255.6197 | -115 | 1    | R.ISFN <b>DTFKER</b> .D                 |
| 130 - 136   | 890.2513  | 889.2440  | 889.4004  | -176 | 0    | R.M <b>TAYFNK</b> .V Oxidation (M)      |
| 146 - 151   | 747.2303  | 746.2231  | 746.3559  | -178 | 1    | K. <b>DEAER</b> .E                      |
| 160 - 171   | 1494.6317 | 1493.6244 | 1493.8163 | -128 | 1    | K. <b>QKTELFMVLIEK</b> .K Oxidation (M) |
| 162 - 171   | 1238.4981 | 1237.4908 | 1237.6628 | -139 | 0    | K. <b>TELFMVLIEK</b> .K Oxidation (M)   |
| 173 - 182   | 1063.5609 | 1062.5536 | 1062.6913 | -130 | 0    | K. <b>LLPLRPGVAK</b> .L                 |
| 204 - 217   | 1471.6254 | 1470.6181 | 1470.7864 | -114 | 0    | K. <b>AVSAIVSCLLGP</b> .A               |
| 223 - 231   | 945.3912  | 944.3839  | 944.5331  | -158 | 0    | K. <b>IFAGDVVPK</b> .K                  |

Spot No.: **173**

Mascot score: **84**

Sequence coverage %: **24**

NCBI accession No.: **gi| 312282781**

Matched peptides No.: **10**

Total peptides No.: **23**

Calculated Mr: **27997**

Calculated pI: **6.00**

### Annotated PMF spectra:

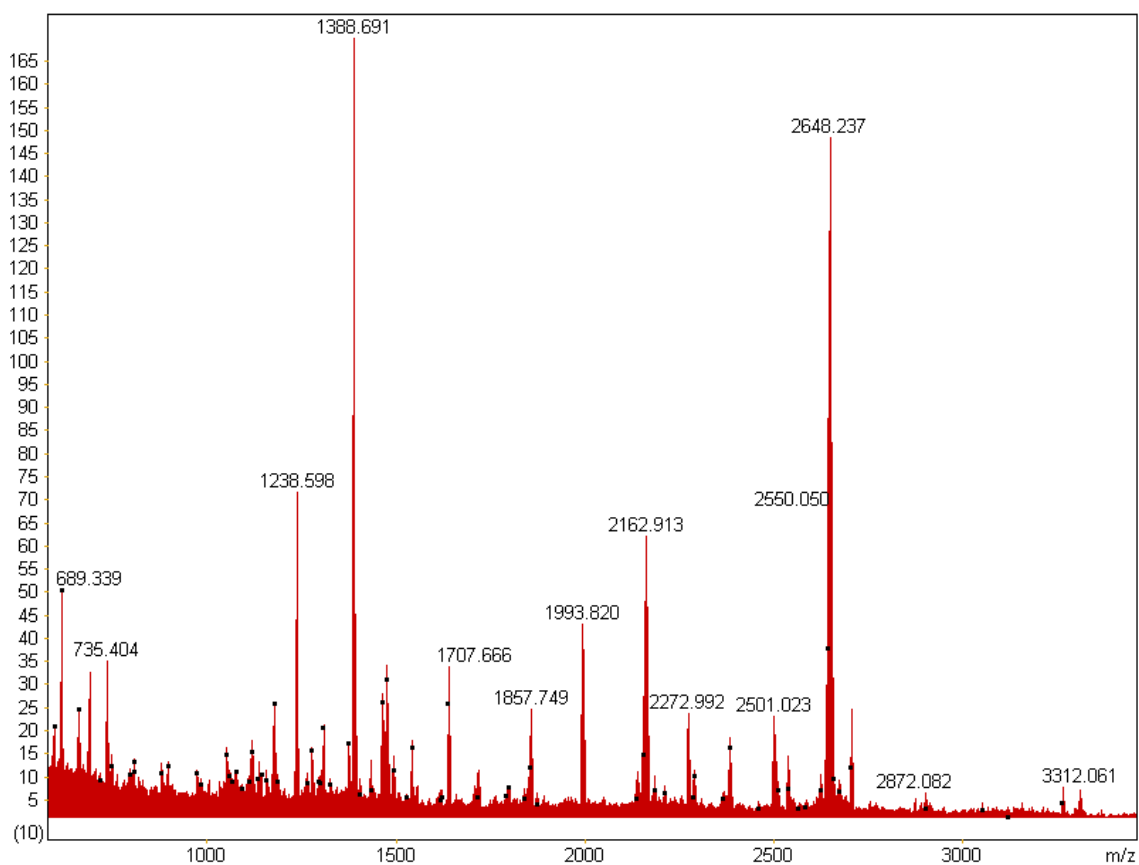

### Probability Based Mowse Score:

Protein score is  $-10 \cdot \log(P)$ , where  $P$  is the probability that the observed match is a random event. Protein scores greater than 72 are significant ( $p < 0.05$ ).

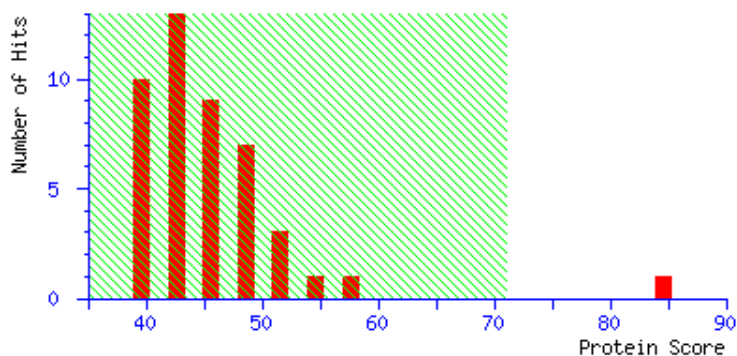

Matched peptide sequences: shown in **Bold Red**

```

1 MASRALSSFT TKPAPSPKPH GVSSASSPAF SIGFSRKTSG RAMVVAAAPV
51 DTNNMPMTGV VFQPFEEVKK ADLAIPIKSH VSLARQGYAD ATEAAINEQI
101 NVEYNVSYVY HSMYAYFDRD NVALKGLAKF FKESSEEERG HA EKFM EYQN
151 KRGGRVKLHP IVSPISEFEH AEKGDALYAM ELALSLEKLT NEKLLNVHSV
201 ATENNDPQLA DVFETEFLGE QIEAIKKISD FITQLRMVGK GHGVWHFDQS
251 LLN

```

Matched peptides information:

| Start - End | Observed  | Mr(expt)  | Mr(calc)  | ppm | Miss | Sequence                         |
|-------------|-----------|-----------|-----------|-----|------|----------------------------------|
| 79 - 85     | 769.5782  | 768.5709  | 768.4242  | 191 | 0    | K.SHVSLAR.Q                      |
| 120 - 125   | 659.5341  | 658.5268  | 658.3650  | 246 | 0    | R.DNVALK.G                       |
| 130 - 139   | 1287.6679 | 1286.6606 | 1286.5779 | 64  | 1    | K.FFKESSEEER.G                   |
| 140 - 151   | 1497.7578 | 1496.7505 | 1496.6718 | 53  | 1    | R.GHA EKFM EYQNK.R Oxidation (M) |
| 145 - 151   | 959.5492  | 958.5419  | 958.4218  | 125 | 0    | K.FMEYQNK.R                      |
| 145 - 151   | 975.5365  | 974.5292  | 974.4167  | 115 | 0    | K.FMEYQNK.R Oxidation (M)        |
| 145 - 152   | 1115.6351 | 1114.6278 | 1114.5229 | 94  | 1    | K.FMEYQNK.R.G                    |
| 145 - 152   | 1131.5949 | 1130.5876 | 1130.5179 | 62  | 1    | K.FMEYQNK.R.G Oxidation (M)      |
| 158 - 173   | 1833.0210 | 1832.0137 | 1831.9468 | 37  | 0    | K.LHP IVSPISEFEHAEK.G            |
| 228 - 236   | 1092.7344 | 1091.7271 | 1091.5975 | 119 | 0    | K.ISDFITQLR.M                    |

Spot No.: **174**

Mascot score: **100**    Sequence coverage %: **21**

NCBI accession No.: **gi| 18408627**

Matched peptides No.: **9**

Total peptides No.: **19**

Calculated Mr: **34680**

Calculated pI: **8.31**

### Annotated PMF spectra:

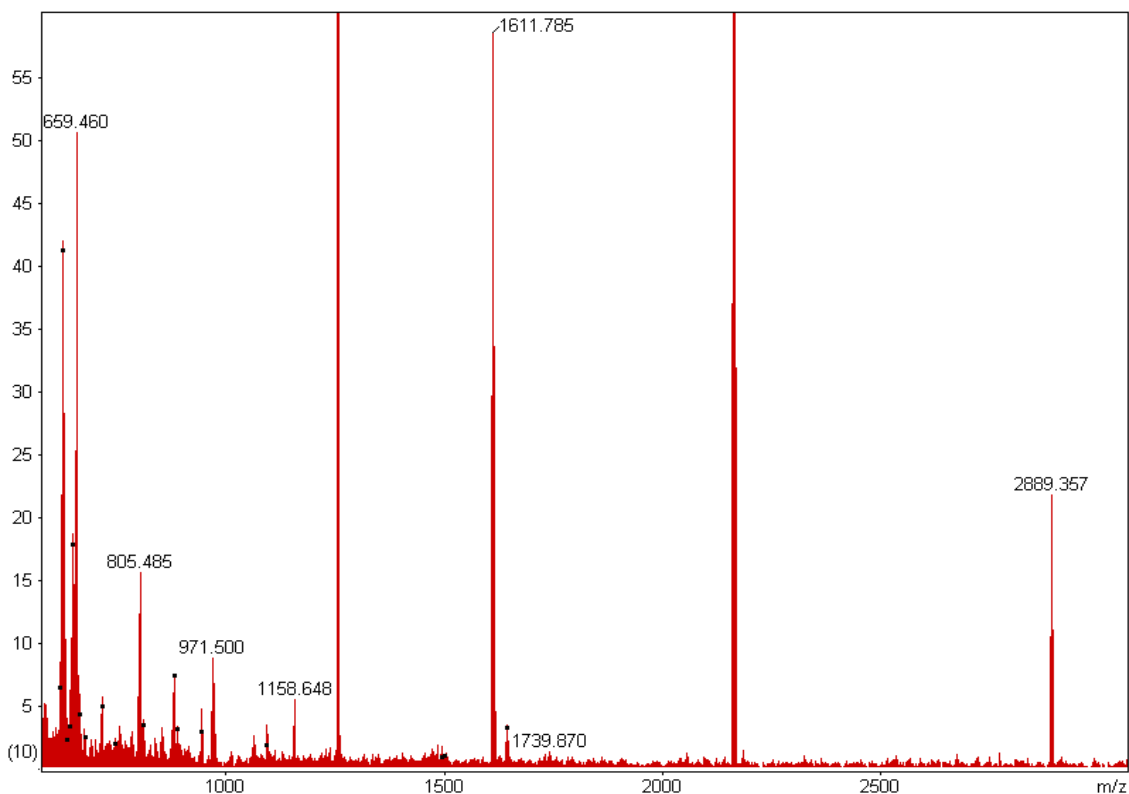

### Probability Based Mowse Score:

Protein score is  $-10 \cdot \log(P)$ , where P is the probability that the observed match is a random event. Protein scores greater than 72 are significant ( $p < 0.05$ ).

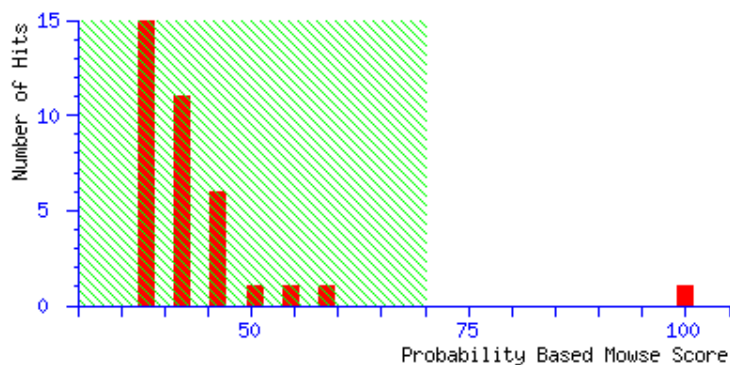

Matched peptide sequences: shown in **Bold Red**

**1** MATVKISLSL ASLSPSSSSS SIQSKLSPSF IPNAAPAKAV KLRFNGKSLR  
**51** AKPMVYRSSR SVGVTCSSASS SLTTLPSALL FDCDGVLDVT EKDGHR**ISFN**  
**101** **DTFKER**DLNV TWDVDLYGEL LK**IGGGKERM** **TAYFNK**VGWP EKAPKDEAER  
**151** KEFIAGLHK**Q** **KTELFMVLIE** **KKLLPLRPGV** AKLVDQALTN GVK**VAVCSTS**  
**201** **NEKA**VSAIVS CLLGPERAEK IK**IFAGDVVP** **KKKPDPAIYN** LAAETLGVDP  
**251** SK**CVVVEDSA** **IGLAAAK**AAG MTCIVTKSGY TADEDFENAD AVFDCIGDPP  
**301** EERFDLAFCG SLLRKQFVS

Matched peptides information:

| Start - End | Observed  | Mr(expt)  | Mr(calc)  | ppm | Miss | Sequence                               |
|-------------|-----------|-----------|-----------|-----|------|----------------------------------------|
| 97 - 104    | 971.5005  | 970.4932  | 970.4760  | 18  | 0    | R. <b>ISFNDTFK.E</b>                   |
| 97 - 106    | 1256.6203 | 1255.6130 | 1255.6197 | -5  | 1    | R. <b>ISFNDTFKER.D</b>                 |
| 123 - 129   | 716.4403  | 715.4330  | 715.3977  | 49  | 1    | K. <b>IGGGKER.M</b>                    |
| 130 - 136   | 890.4219  | 889.4146  | 889.4004  | 16  | 0    | R. <b>MTAYFNK.V</b> Oxidation (M)      |
| 160 - 171   | 1494.8055 | 1493.7982 | 1493.8163 | -12 | 1    | K. <b>QKTELFMVLIEK.K</b> Oxidation (M) |
| 162 - 171   | 1238.6130 | 1237.6057 | 1237.6628 | -46 | 0    | K. <b>TELFMVLIEK.K</b> Oxidation (M)   |
| 194 - 203   | 1094.5573 | 1093.5500 | 1093.5074 | 39  | 0    | K. <b>VAVCSTSNEK.A</b>                 |
| 223 - 231   | 945.5579  | 944.5506  | 944.5331  | 18  | 0    | K. <b>IFAGDVVPK.K</b>                  |
| 253 - 267   | 1502.7375 | 1501.7302 | 1501.7810 | -34 | 0    | K. <b>CVVVEDSAIGLAAAK.A</b>            |

Spot No.: **175**

Mascot score: **85**

Sequence coverage %: **36**

NCBI accession No.: **gi| 15222972**

Matched peptides No.: **8**

Total peptides No.: **42**

Calculated Mr: **34442**

Calculated pI: **5.93**

### Annotated PMF spectra:

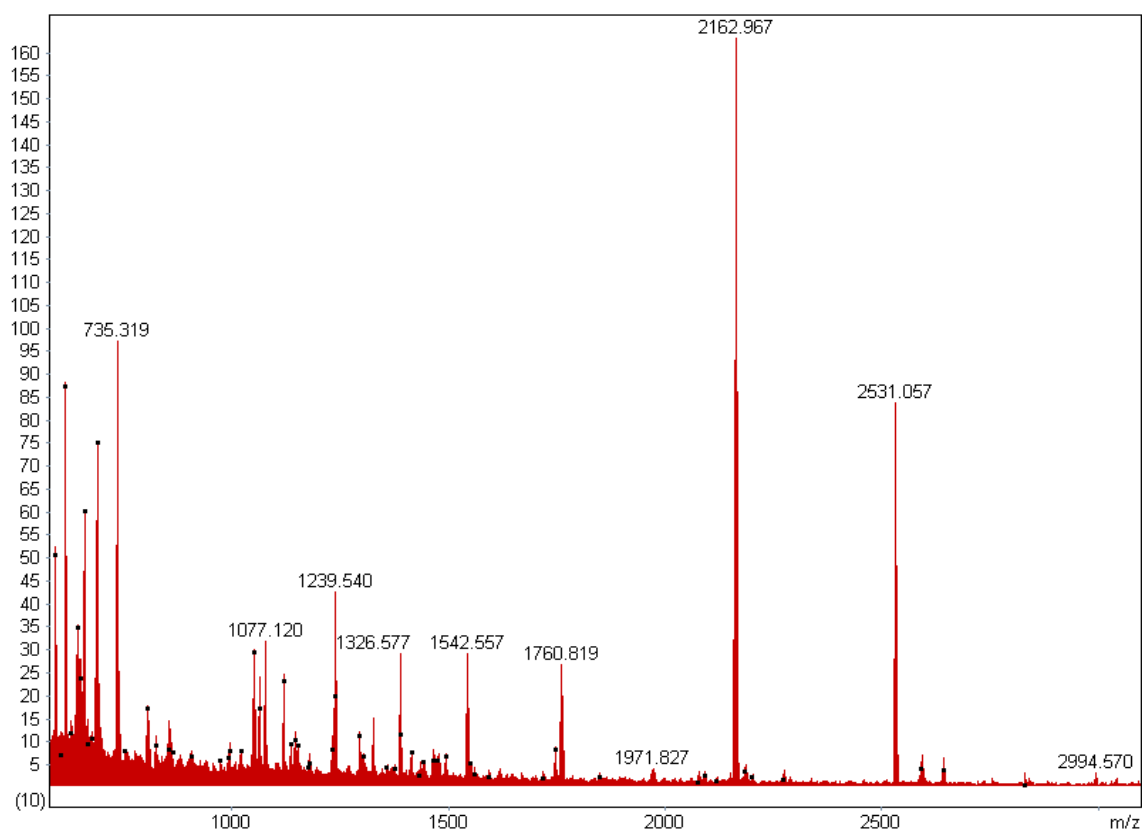

### Probability Based Mowse Score:

Protein score is  $-10 \cdot \log(P)$ , where P is the probability that the observed match is a random event. Protein scores greater than 72 are significant ( $p < 0.05$ ).

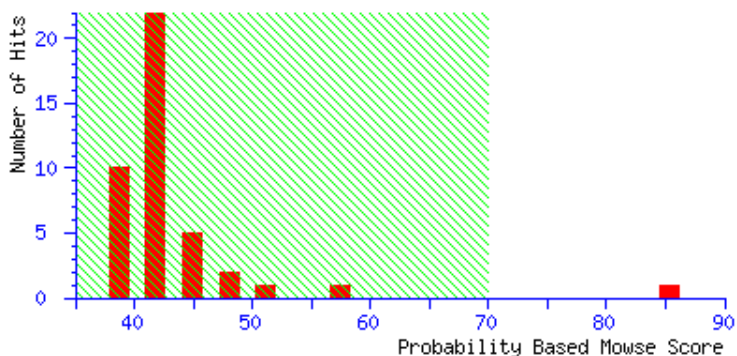

Matched peptide sequences: shown in **Bold Red**

**1 MALVVICGQP CSGKSIAAVT LAETLKESET KQSVRIIDEA SFHLDRNQNY**  
**51 ANMPAEKNLR** GKLRSDVDRS **VSTGEIVVD SLNSIKGYRY** ELWCIAARAAG  
**101 IRYCVVYCDV** DEAHCRQWNK ERSDRGEDGY DDGIFEDLVR **RFEKPERRNR**  
**151 WDSPLFELYP** SREVIDKSSP VILEAVTYLT KTVDSKTQDV RILQPSIATQ  
**201 AARFSEANSL** YELDRATQEI INAIVEQQLS GAAISR**VTLG NELPPIEICR**  
**251 PIGLPELRR** RRTFVK**LMGQ SSSLGPPLPT DADSAKRRFV** DYLNREFGGN  
**301 NA**

Matched peptides information:

| Start - End | Observed  | Mr(expt)  | Mr(calc)  | ppm  | Miss | Sequence                                 |
|-------------|-----------|-----------|-----------|------|------|------------------------------------------|
| 2 - 14      | 1388.6576 | 1387.6503 | 1387.6952 | -32  | 0    | M.ALVVICGQPCSGK.S                        |
| 27 - 35     | 1063.3355 | 1062.3282 | 1062.5305 | -190 | 1    | K.ESETKQSVR.I                            |
| 36 - 57     | 2592.2308 | 2591.2235 | 2591.2074 | 6    | 1    | R.IIDEASFHLDRNQNYANMPAEK.N Oxidation (M) |
| 47 - 57     | 1295.6112 | 1294.6039 | 1294.5612 | 33   | 0    | R.NQNYANMPAEK.N Oxidation (M)            |
| 70 - 86     | 1760.8193 | 1759.8120 | 1759.9567 | -82  | 0    | R.SVSTGEIVIVDSLNSIK.G                    |
| 142 - 147   | 805.3438  | 804.3365  | 804.4130  | -95  | 0    | R.FEKPER.R                               |
| 237 - 259   | 2642.1420 | 2641.1347 | 2641.4737 | -128 | 1    | R.VTLGNELPPIEICRPIGLPELRR.L              |
| 267 - 286   | 1971.8268 | 1970.8195 | 1970.9619 | -72  | 0    | K.LMGQSSSLGPPLPTDADSAK.R                 |

Spot No.: 176

Mascot score: 83

Sequence coverage %: 19

NCBI accession No.: gi| 147795173

Matched peptides No.: 19

Total peptides No.: 61

Calculated Mr: 112287

Calculated pI: 8.88

### Annotated PMF spectra:

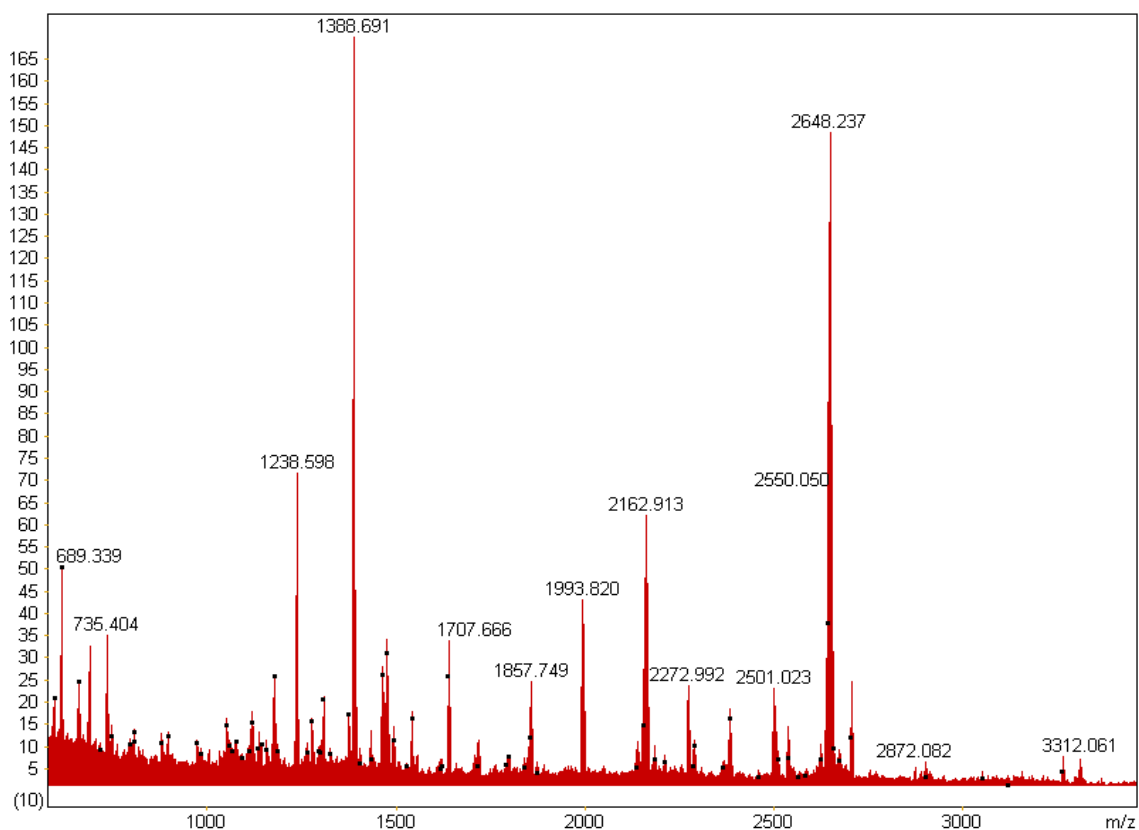

### Probability Based Mowse Score:

Protein score is  $-10 \cdot \log(P)$ , where P is the probability that the observed match is a random event. Protein scores greater than 72 are significant ( $p < 0.05$ ).

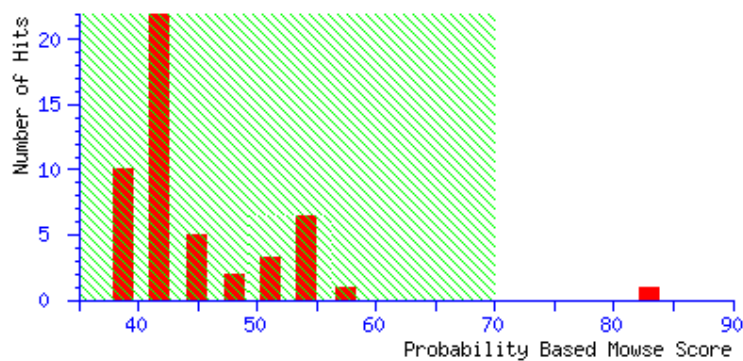



## Matched peptide sequences: shown in **Bold Red**

1 MSGSGGFAVS RTPSGDR**FYN** **SPAMRRHQQL** LLQQQQQVEQ **RRHQQQKQLR**  
51 SEPAAEAEAR TSDDDSTLSK PSVCSASPPR PAANMTNIDR LVESVTPVVP  
101 AQYTSEASIR GWRTREIDHN PFFFLGDLWE SFKEWSVYGV GVPLLLNGSD  
151 SVKQYVVPFL SGIQLYIDPR KPLSWLRRPG EESDAESSRE TSSAGSSDCE  
201 AERRAKGVAD GAWSQHNPMM LNSQRMSRLS **LREKSHMSSS** **SDEAEAKVRH**  
251 **SFMVRVVGRF** MVLTHCQRFI TCLWLASIVE XISLQCLILF QVGRKALGVS  
301 FGMKVLINPK CLWLQIFSS PTKQRGLILC VVVQPSDLSI FVSSSVKTVP  
351 TKGRKK**DGCG** **FSLAQFCYAR** **TLPTGNLNSR** FKGIWGLTVL IRLPLSVWLY  
401 **IEGNNNFYIR** NRYSAFSRIH NRDERLRVGF CRSEITLSKL IRMGVRARNG  
451 NDRFR**TIWTP** **EMDRYFIDLM** **LEQVNKGNRI** DDHLFSKRAW KQMTALFNAK  
501 FNFQYEKDV L KNRHKTLRNL YKAIKNLLCQ RGFSWDEQRQ MVTADNNVWD  
551 EYIKGHPDAR SYRIKTIPYY NDLCFIYRNA **TPEQKGMHFG** **HDGNLDNSIS**  
601 **GSKMSGISPV** TSVDDGEPTD IIHESHS GG NKIVTATQPM SLGEVAVEAL  
651 HDIMINEEYD ISLSKETVDE KPQAPPGETG PSMHRTRTY WQPPMDR**YFI**  
701 **DLMLDQVQKG** **NQVDGVFRKQ** **AWMEMIASFN** **AKFGFKYDMD** VLKRNFRKTLR  
751 RQYNVIRSL DLNGFIWDDT RQMVTADDCV WQDYIKHTN ARQYMTRPVP  
801 YYQDLCVICR ELSIDGRDTD LGYDEPDDIP EVKFQGV LKI SESPAA SFSS  
851 EEQLGELKES SHSGLRRNKR QLENPSNSAT PKRIRK**KDGN** **MASALREMT**  
901 AVSSISEKNK DDENSGSISI ESVIEAVQAL PDMDEELVLD ACDFLEDEKK  
951 AKTFLALDVK LRKK**WLIRKL** RPQQL

## Matched peptides information:

1 MSGSGGFAVS RTPSGDR**FYN** **SPAMRRHQQL** LLQQQQQVEQ **RRHQQQKQLR**  
51 SEPAAEAEAR TSDDDSTLSK PSVCSASPPR PAANMTNIDR LVESVTPVVP  
101 AQYTSEASIR GWRTREIDHN PFFFLGDLWE SFKEWSVYGV GVPLLLNGSD  
151 SVKQYVVPFL SGIQLYIDPR KPLSWLRRPG EESDAESSRE TSSAGSSDCE  
201 AERRAKGVAD GAWSQHNPMM LNSQRMSRLS **LREKSHMSSS** **SDEAEAKVRH**  
251 **SFMVRVVGRF** MVLTHCQRFI TCLWLASIVE XISLQCLILF QVGRKALGVS  
301 FGMKVLINPK CLWLQIFSS PTKQRGLILC VVVQPSDLSI FVSSSVKTVP  
351 TKGRKK**DGCG** **FSLAQFCYAR** **TLPTGNLNSR** FKGIWGLTVL IRLPLSVWLY  
401 **IEGNNNFYIR** NRYSAFSRIH NRDERLRVGF CRSEITLSKL IRMGVRARNG  
451 NDRFR**TIWTP** **EMDRYFIDLM** **LEQVNKGNRI** DDHLFSKRAW KQMTALFNAK  
501 FNFQYEKDV L KNRHKTLRNL YKAIKNLLCQ RGFSWDEQRQ MVTADNNVWD  
551 EYIKGHPDAR SYRIKTIPYY NDLCFIYRNA **TPEQKGMHFG** **HDGNLDNSIS**  
601 **GSKMSGISPV** TSVDDGEPTD IIHESHS GG NKIVTATQPM SLGEVAVEAL  
651 HDIMINEEYD ISLSKETVDE KPQAPPGETG PSMHRTRTY WQPPMDR**YFI**  
701 **DLMLDQVQKG** **NQVDGVFRKQ** **AWMEMIASFN** **AKFGFKYDMD** VLKRNFRKTLR  
751 RQYNVIRSL DLNGFIWDDT RQMVTADDCV WQDYIKHTN ARQYMTRPVP  
801 YYQDLCVICR ELSIDGRDTD LGYDEPDDIP EVKFQGV LKI SESPAA SFSS  
851 EEQLGELKES SHSGLRRNKR QLENPSNSAT PKRIRK**KDGN** **MASALREMT**  
901 AVSSISEKNK DDENSGSISI ESVIEAVQAL PDMDEELVLD ACDFLEDEKK  
951 AKTFLALDVK LRKK**WLIRKL** RPQQL

Spot No.: 177

Mascot score: 82

Sequence coverage %: 25

NCBI accession No.: gi| 226523893

Matched peptides No.: 31

Total peptides No.: 128

Calculated Mr: 129198

Calculated pI: 9.62

### Annotated PMF spectra:

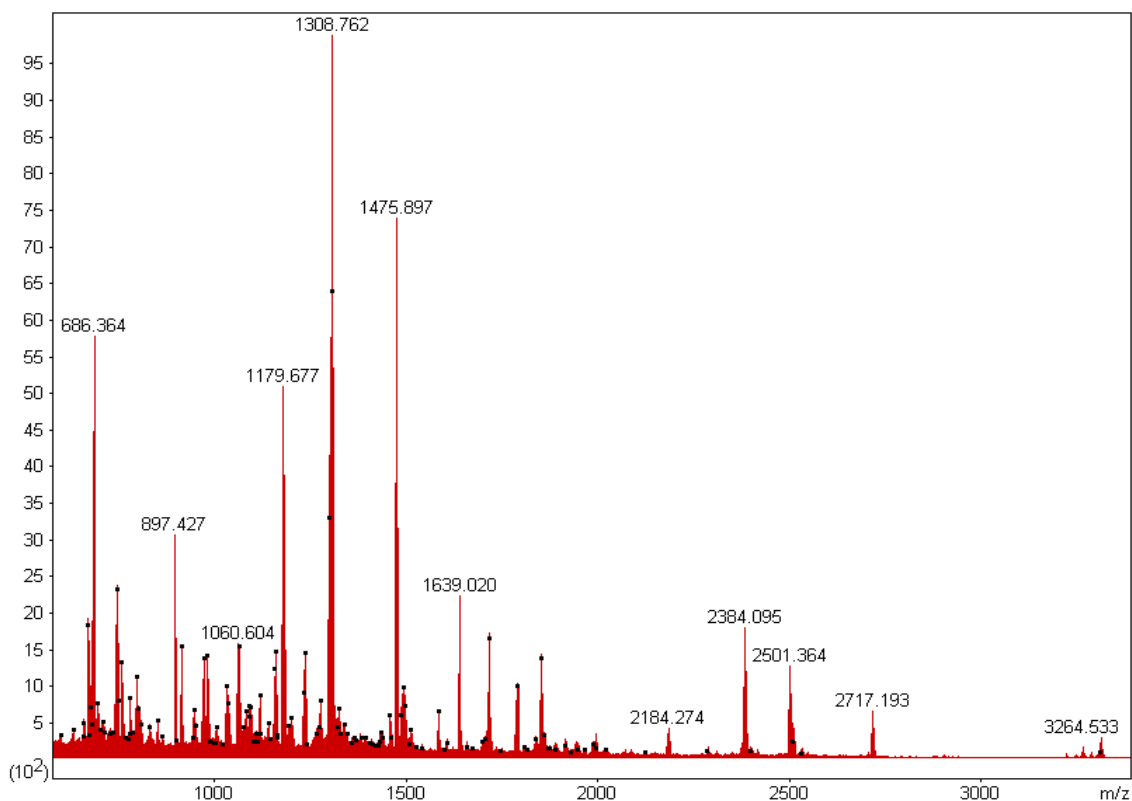

### Probability Based Mowse Score:

Protein score is  $-10 \cdot \log(P)$ , where P is the probability that the observed match is a random event. Protein scores greater than 72 are significant ( $p < 0.05$ ).

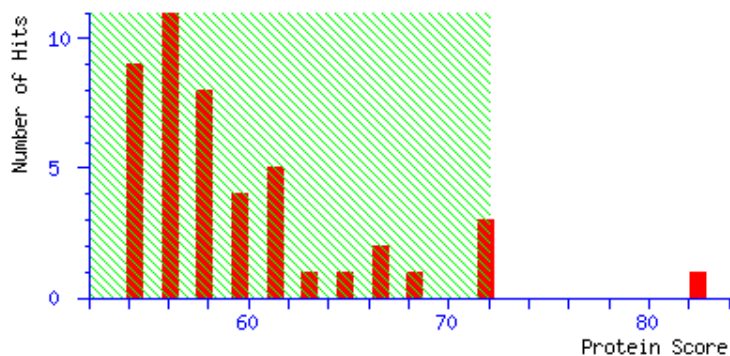

## Matched peptide sequences: shown in **Bold Red**

```

1 MVLTTNNQGV AALASRMTKP AVIVAPRSNT TRLEDFEIQR KLGKGSFGVV
51 YAVTRRRDPT ERKRTYVMKQ ISMGPSRRDQ EEAINECRVL AKLNHAHVVR
101 YHESFVASGN RLCIVMEYAP KGTVHSLVQG AKPKALSEDV VWRLLTQSAL
151 GLHHIHGLKI LHRDIKAENI FLDKDGNAKI GDLGVAKVMT HAVDFAKTLV
201 GTPYYLSPDL CENKPYNHKS DVWSLGCVVY EMMTGSHPFN AQNQGALFVK
251 ILKGKYPPVR DASFSADLKE LMDRCLTVNQ TRRPDTAGIL RSRAARAKAN
301 ALGLQLPSDV PPPSNPREAF AAAARPVTDQ PPKPDQATQ LAARQORRAA
351 TAVGSSRADR AAARGGPNGG P'TETALQAVE RIASARGADR VGRRVGHVPGD
401 FVRVRLGEIS GLPVGYGGAG GLAYAAARMA DASAAARRPS TATHDRTAGR
451 SAAVIAGIAA AAAGGGVRGV AAAESELLRRI RAESARTAAR ADDAARHRAV
501 AVDAARDAED EASRRRKEAG DAMRAARERR REREEERQK VLAERRRARV
551 EAAAIAAEES RAKLAAAKAE LVNQRRRQS GRVNTGGYDG NGPETAGKRL
601 ETDRTPPSFP LRKTALPPSP LQGLAAATGA APAGAAPRRA PSSRKPTAAN
651 PGTVAAPARPA SAMPVTAPVT VLVGSRVGEV STSRPKSAE RREAARVADA
701 DLVAALPESP GADGVRTRDV PPTAIHPFDR PDDFDEARAM AELAARHVPP
751 KVNFEGKNRS EQPETPKPAR DDGWDEGVSP SPAAPSRRSR PRTAGGVVDV
801 AKARRDAAEA SRAAVRAAKS PKKSPKSPK ASHPSSRPAS AFIRRTGDIF
851 GGARGRARPV TARDVSDSTS SESSSSKMPH PAVSSYAEAH ERRTRAPHPS
901 PPVQGTAAA IGVARLAVLA VDHFVASAGE GNDGSLGSLG AGSGSSISSE
951 EISRAAAEA AAARAAASVA SEGRAEPASS SSGTSSSSSR DGVEGDKENR
1001 DGGVPAFVFG DATGDASGDD DDDYSPSAF EDSGNLRAAA GSPDPAGAV
1051 ARALRATVRA LESVLGSPHP SINS DAGLKP FVDDEEESSE SGSEPGTNPS
1101 TPRSEYSDA ARHSECSDSE ERFVRAHGAS RAERVEELVS EMTATEDAAV
1151 ALVGAESFGL LYDFLARSE AAQDGRLHEK PGTPEKVRQL SERVFDIVPR
1201 EKAEAVALAH RYAYLVERLE AV

```

## Matched peptides information:

| Start - End | Observed  | Mr(expt)  | Mr(calc)  | ppm  | Miss | Sequence                                        |
|-------------|-----------|-----------|-----------|------|------|-------------------------------------------------|
| 58 - 63     | 745.3946  | 744.3873  | 744.3766  | 14   | 1    | R.DPT <b>ERK</b> .R                             |
| 64 - 69     | 797.3515  | 796.3442  | 796.4265  | -103 | 1    | K. <b>RTYVMK</b> .Q                             |
| 65 - 69     | 657.2327  | 656.2254  | 656.3203  | -145 | 0    | R. <b>TYVMK</b> .Q Oxidation (M)                |
| 65 - 77     | 1497.9091 | 1496.9018 | 1496.7479 | 103  | 1    | R. <b>TYVMKQISMGPSR</b> .R                      |
| 65 - 77     | 1513.8842 | 1512.8769 | 1512.7429 | 89   | 1    | R. <b>TYVMKQISMGPSR</b> .R Oxidation (M)        |
| 79 - 92     | 1674.8790 | 1673.8717 | 1673.8042 | 40   | 1    | R. <b>DQEEAINECRVLAK</b> .L                     |
| 93 - 100    | 945.5112  | 944.5039  | 944.5304  | -28  | 0    | K. <b>LNHAHVVR</b> .Y                           |
| 135 - 143   | 1074.5824 | 1073.5751 | 1073.5506 | 23   | 0    | K. <b>ALSEDVVWR</b> .L                          |
| 167 - 179   | 1434.8666 | 1433.8593 | 1433.7150 | 101  | 1    | K. <b>AENIFLDKDGNAK</b> .I                      |
| 188 - 197   | 1118.5784 | 1117.5711 | 1117.5590 | 11   | 0    | K. <b>VMTHAVDPAK</b> .T                         |
| 256 - 260   | 631.2763  | 630.2690  | 630.3489  | -127 | 0    | K. <b>YPPVR</b> .D                              |
| 270 - 274   | 679.3334  | 678.3261  | 678.3007  | 38   | 0    | K. <b>ELMDR</b> .C Oxidation (M)                |
| 283 - 293   | 1241.6548 | 1240.6475 | 1240.7000 | -42  | 1    | R. <b>RPDTAGILRSR</b> .A                        |
| 361 - 381   | 2023.0821 | 2022.0748 | 2022.0242 | 25   | 1    | R. <b>AAARGGPNGGPTETALQAV</b> <b>ER</b> .I      |
| 469 - 479   | 1158.6695 | 1157.6622 | 1157.6153 | 41   | 1    | R. <b>GVAAAESELRR</b> .I                        |
| 480 - 486   | 802.4276  | 801.4204  | 801.4457  | -32  | 1    | R. <b>IRAESAR</b> .T                            |
| 497 - 506   | 1065.5644 | 1064.5571 | 1064.5839 | -25  | 1    | R. <b>HRAVAVDAAR</b> .D                         |
| 518 - 524   | 749.3433  | 748.3360  | 748.3174  | 25   | 0    | K. <b>EAGDAMR</b> .A                            |
| 579 - 598   | 1965.0928 | 1964.0855 | 1963.8984 | 95   | 1    | R. <b>QSGRVNTGGYDGNGPETAGK</b> .R               |
| 605 - 612   | 914.5542  | 913.5469  | 913.5022  | 49   | 0    | R. <b>TPPSFPLR</b> .K                           |
| 739 - 746   | 832.4666  | 831.4594  | 831.4272  | 39   | 0    | R. <b>AMAE<b>LAAR</b></b> .H                    |
| 739 - 751   | 1406.7897 | 1405.7824 | 1405.7500 | 23   | 1    | R. <b>AMAE<b>LAARHVPPK</b></b> .V Oxidation (M) |
| 789 - 802   | 1412.7661 | 1411.7588 | 1411.7896 | -22  | 1    | R. <b>SRPRTAGGVVDVAK</b> .A                     |
| 813 - 819   | 686.3641  | 685.3568  | 685.4235  | -97  | 1    | R. <b>AAVRAAK</b> .S                            |
| 878 - 893   | 1838.1080 | 1837.1007 | 1836.8689 | 126  | 1    | K. <b>MPHPAVSSYAEAHERR</b> .T                   |
| 965 - 990   | 2384.0954 | 2383.0881 | 2383.0847 | 1    | 1    | R. <b>AAASVASEGRAEPASSSGTSSSSSR</b> .D          |
| 1038 - 1052 | 1307.7834 | 1306.7761 | 1306.6629 | 87   | 0    | R. <b>AAAGSPDPAGAVAR</b> .A                     |
| 1113 - 1122 | 1235.6618 | 1234.6545 | 1234.4520 | 164  | 0    | R. <b>HSECS<b>DSEER</b></b> .F                  |
| 1168 - 1176 | 989.5283  | 988.5210  | 988.4686  | 53   | 1    | R. <b>RSEAAQDGR</b> .L                          |
| 1189 - 1200 | 1458.8390 | 1457.8317 | 1457.7991 | 22   | 1    | R. <b>QLSERVFDIVPR</b> .E                       |
| 1201 - 1211 | 1194.6639 | 1193.6566 | 1193.6516 | 4    | 1    | R. <b>EKA<b>EAVALAH</b></b> .Y                  |

Spot No.: **178**

Mascot score: **92**

Sequence coverage %: **28**

NCBI accession No.: **gi| 312282781**

Matched peptides No.: **9**

Total peptides No.: **28**

Calculated Mr: **27997**

Calculated pI: **6.00**

### Annotated PMF spectra:

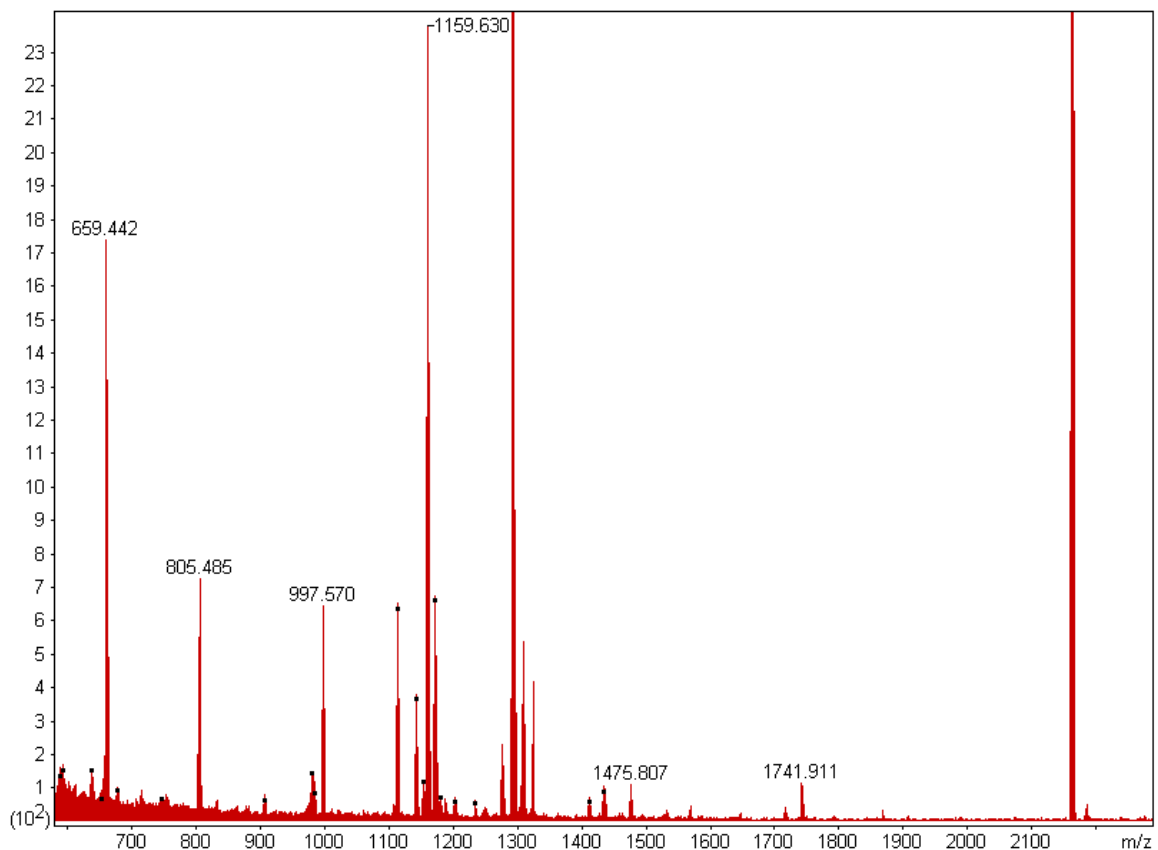

### Probability Based Mowse Score:

Protein score is  $-10 \cdot \log(P)$ , where P is the probability that the observed match is a random event. Protein scores greater than 72 are significant ( $p < 0.05$ ).

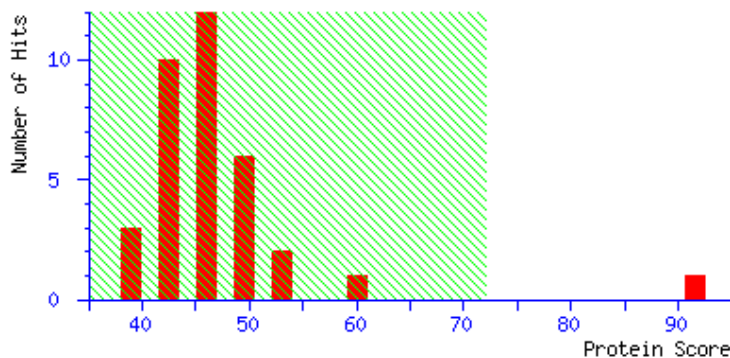

Matched peptide sequences: shown in **Bold Red**

```
1 MASRALSSFT TKPAPSPKPH GVSSASSPAF SIGFSRKTSG RAMVVAAPV
51 DTNNMPMTGV VFQPFEEVKK ADLAIPIKSH VSLARQGYAD ATEAAINEQI
101 NVEYNVSYVY HSMYAYFDRD NVALKGLAKF FKESSEEERG HAEKFMEYQN
151 KRGGRVKLHP IVSPISEFEH AEKGDALYAM ELALSLEKLT NEKLLNVHSV
201 ATENNDPQLA DFBVETEFLEGE QIEAIKKISD FITQLRMVGK GHGVWHFDQS
251 LLN
```

Matched peptides information:

| Start - End | Observed  | Mr(expt)  | Mr(calc)  | ppm  | Miss Sequence                       |
|-------------|-----------|-----------|-----------|------|-------------------------------------|
| 79 - 85     | 769.3198  | 768.3125  | 768.4242  | -145 | 0 K.SHVSLAR.Q                       |
| 120 - 125   | 659.2740  | 658.2668  | 658.3650  | -149 | 0 R.DNVALK.G                        |
| 130 - 139   | 1287.4622 | 1286.4549 | 1286.5779 | -96  | 1 K.FFKESSEEER.G                    |
| 133 - 139   | 865.2333  | 864.2260  | 864.3461  | -139 | 0 K.ESSEEER.G                       |
| 145 - 151   | 975.2854  | 974.2781  | 974.4167  | -142 | 0 K.FMEYQNK.R Oxidation (M)         |
| 156 - 173   | 2059.9988 | 2058.9915 | 2059.1102 | -58  | 1 R.VKLHPIVSPISFEFEHAEK.G           |
| 158 - 173   | 1832.8250 | 1831.8177 | 1831.9468 | -70  | 0 K.LHPIVSPISFEFEHAEK.G             |
| 174 - 188   | 1639.6794 | 1638.6721 | 1638.8174 | -89  | 0 K.GDALYAMELALSLEK.L Oxidation (M) |
| 228 - 236   | 1092.4888 | 1091.4815 | 1091.5975 | -106 | 0 K.ISDFITQLR.M                     |

Spot No.: **179**

Mascot score: **89**

Sequence coverage %: **28**

NCBI accession No.: **gi| 88175069**

Matched peptides No.: **7**

Total peptides No.: **18**

Calculated Mr: **24790**

Calculated pI: **5.16**

### Annotated PMF spectra:

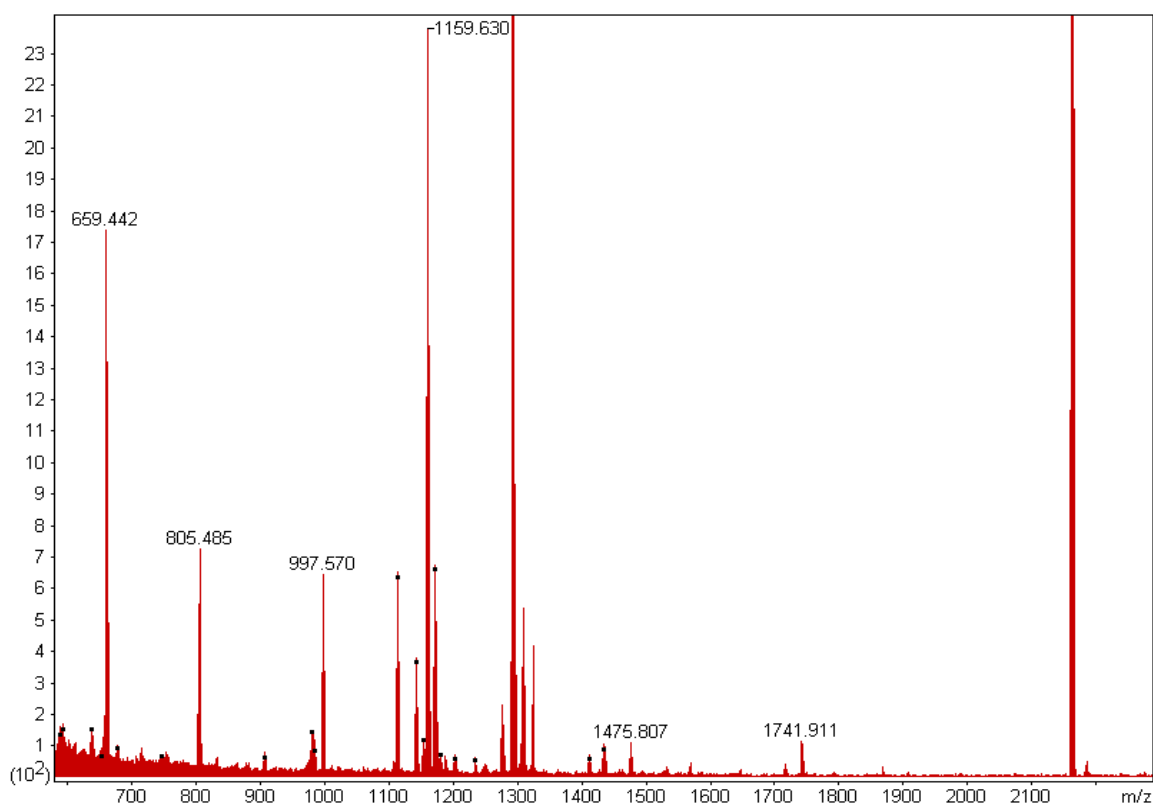

### Probability Based Mowse Score:

Protein score is  $-10 \cdot \log(P)$ , where P is the probability that the observed match is a random event. Protein scores greater than 72 are significant ( $p < 0.05$ ).

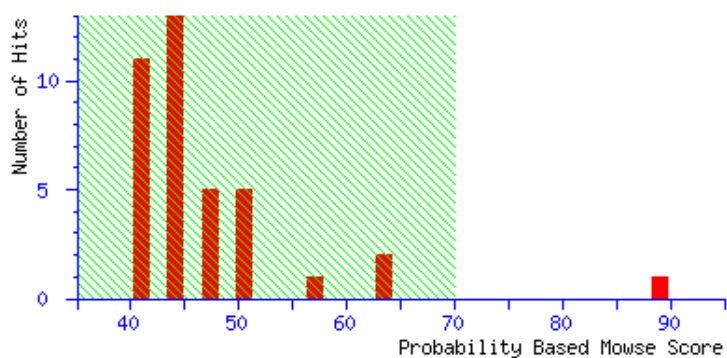

Matched peptide sequences: shown in **Bold Red**

**1** GASGIGEATA RELVKNGARV VLADVQDDLQ RALATDLGAD AASYTRCDVT  
**51** DEAQVAAAVD LAVARHGKLD TIFMNAGVVG SLAR**SPLGAL DLDDFDRVMA**  
**101** VNTR**GVMAGV KHAAR**VVMVPR RSGSIICTAS IAGVLGMITP HPYSVSKSAV  
**151** VGLVR**AVAGE VARGV**RVNA ISPNYIPTPL VMR**ILEEWYP ERSAD**EHRLI  
**201** **VERDINEMEG** VWLEPEDIAR **AAVYLASDES KYVM**

Matched peptides information:

| Start - End | Observed  | Mr(expt)  | Mr(calc)  | ppm | Miss | Sequence                      |
|-------------|-----------|-----------|-----------|-----|------|-------------------------------|
| 85 - 97     | 1433.7808 | 1432.7735 | 1432.6834 | 63  | 0    | R.SPLGALDLDDFDR.V             |
| 105 - 111   | 677.3683  | 676.3611  | 676.3578  | 5   | 0    | R.GVMAGVK.H Oxidation (M)     |
| 105 - 115   | 1112.6299 | 1111.6226 | 1111.5920 | 28  | 1    | R.GVMAGVKHAAR.V Oxidation (M) |
| 156 - 167   | 1171.6330 | 1170.6257 | 1170.6469 | -18 | 1    | R.AVAGEVARGVR.V               |
| 184 - 192   | 1234.6948 | 1233.6875 | 1233.6030 | 69  | 0    | R.ILEEWYPER.S                 |
| 193 - 203   | 1324.7269 | 1323.7196 | 1323.6895 | 23  | 1    | R.SADHRLIVER.D                |
| 221 - 231   | 1153.6329 | 1152.6256 | 1152.5662 | 52  | 0    | R.AAVYLASDESK.Y               |

Spot No.: **180**

Mascot score: **84**

Sequence coverage %: **29**

NCBI accession No.: **gi| 183206803**

Matched peptides No.: **16**

Total peptides No.: **91**

Calculated Mr: **54896**

Calculated pI: **6.27**

### Annotated PMF spectra:

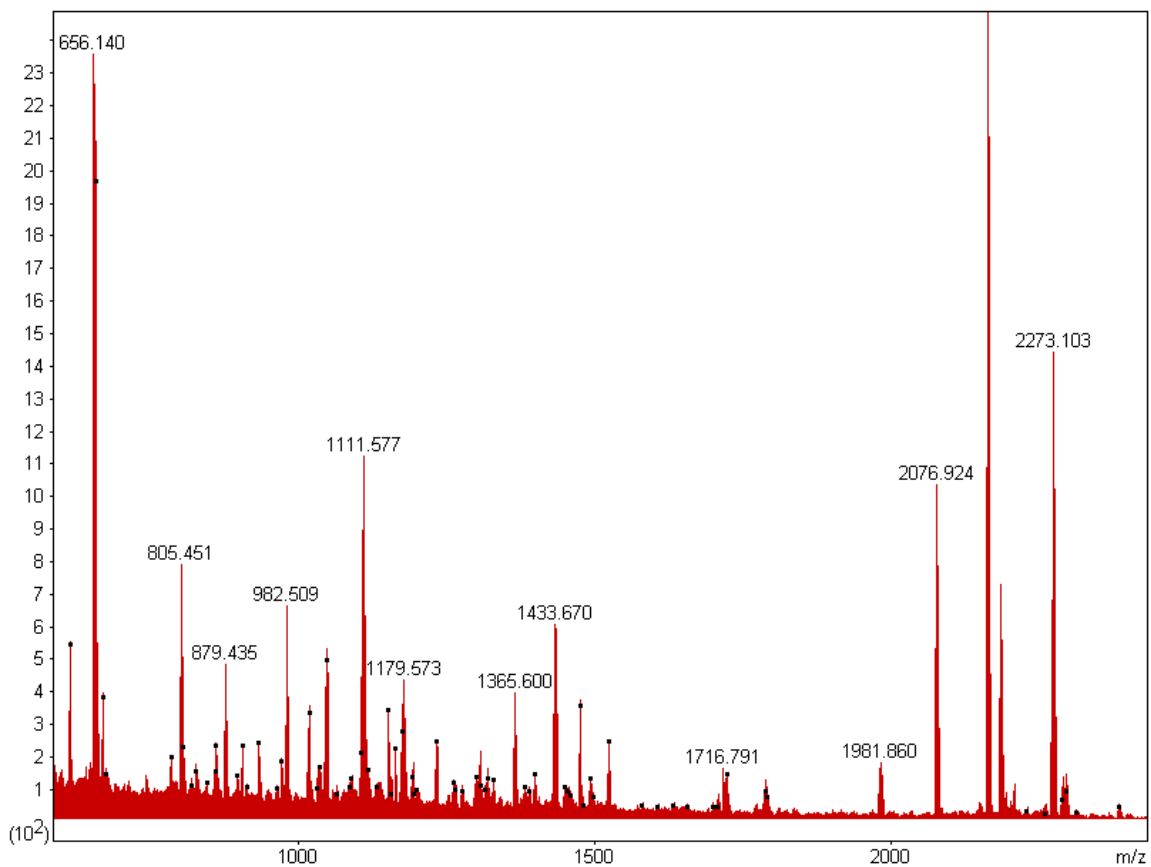

### Probability Based Mowse Score:

Protein score is  $-10 \cdot \log(P)$ , where P is the probability that the observed match is a random event. Protein scores greater than 72 are significant ( $p < 0.05$ ).

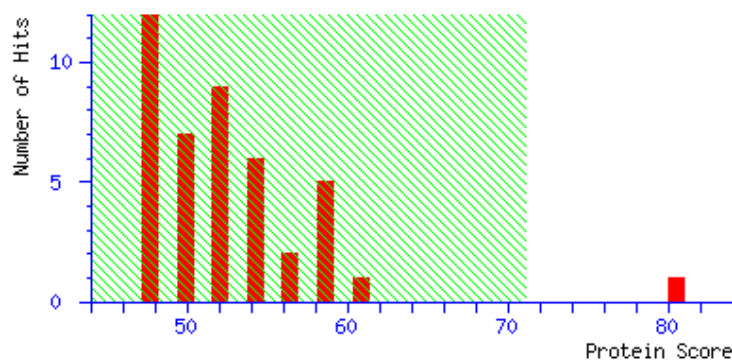



Matched peptide sequences: shown in **Bold Red**

1 **MHSSL**SFAAV **CRPEAV**GPRT **LSNGR**GSSVI **ADSSAIL**SIR LTRAMQP**DVC**  
 51 RNLKLR**RTQV** **RSDAAPS**AVG SHTGE**FDTKA** **FRRTL**TRKEN YNRK**GFGHKE**  
 101 **ETLEAM**DKEY TSDII**KT**LKE NNNEY**TW**GNV TVK**LAES**FGF CWG**VERAV**Q**I**  
 151 **AYEAR**KQFPD **QKLWIT**NEIM **HNPTV**N**QRLK** **EMQIE**DIPVM **EEGKK**FDVVN  
 201 NDDVVILPAF GAAL**SEM**QIL DEK**GVK**IAD**T** **TCPWV**SKVWN TVEK**HKKES**F  
 251 TSVI**HGK**KGH EETVAT**SSFA** GKYI**I**VKDIK EATY**VCD**YIL AGK**L**DG**SSST**  
 301 KEE**FLK**KFEK AIS**RGF**DPDC **DLVKV**GIAN**Q** **TTMLK**GETEE **IGK**LLEKT**MM**  
 351 **QKYG**VEFINE HFMC**FNT**ICD AT**QER**QDAMY NLV**KEK**LDLI L**VVG**GWN**SSN**  
 401 TSH**LQEI**AEQ NGT**PTY**WIDS EK**RIG**PGNRI AYK**LSH**GELV GKEN**WL**PTGP  
 451 LKIGITSGAS TPD**KIL**EDTL KVV**FKM**KDEE **ALQ**MV

Matched peptides information:

| Start - End | Observed  | Mr (expt) | Mr (calc) | ppm | Miss Sequence                                     |
|-------------|-----------|-----------|-----------|-----|---------------------------------------------------|
| 2 - 25      | 2569.0767 | 2568.0694 | 2568.2979 | -89 | 1 M.HSSL <b>SFAAVCRPEAVGPRTLSNGR</b> .G           |
| 26 - 40     | 1475.7141 | 1474.7068 | 1474.7991 | -63 | 0 R.GSS <b>VIADSSAILSIR</b> .L                    |
| 57 - 61     | 659.4546  | 658.4474  | 658.3875  | 91  | 1 R. <b>RTQVR</b> .S                              |
| 100 - 108   | 1065.5144 | 1064.5071 | 1064.4696 | 35  | 0 K.E <b>ETLEAMDK</b> .E                          |
| 147 - 155   | 1020.4968 | 1019.4895 | 1019.5400 | -49 | 0 R. <b>AVQIAYEAR</b> .K                          |
| 163 - 178   | 1981.8603 | 1980.8530 | 1980.9840 | -66 | 0 K.L <b>WITNEIMHNPTVNQR</b> .L Oxidation (M)     |
| 163 - 180   | 2206.9711 | 2205.9638 | 2206.1681 | -93 | 1 K.L <b>WITNEIMHNPTVNQRLK</b> .E                 |
| 181 - 195   | 1791.6926 | 1790.6853 | 1790.8430 | -88 | 1 K. <b>EMQIEDIPVMEGKK</b> .F Oxidation (M)       |
| 227 - 237   | 1277.6640 | 1276.6567 | 1276.6122 | 35  | 0 K. <b>IADTTCPWVSK</b> .V                        |
| 315 - 324   | 1165.5601 | 1164.5528 | 1164.5121 | 35  | 0 R. <b>GFD</b> PCDL <b>VK</b> .V                 |
| 325 - 335   | 1175.5333 | 1174.5260 | 1174.6380 | -95 | 0 K. <b>VGIANQTTMLK</b> .G                        |
| 336 - 343   | 862.4543  | 861.4470  | 861.4080  | 45  | 0 K. <b>GETEEIGK</b> .L                           |
| 344 - 352   | 1153.5425 | 1152.5352 | 1152.5882 | -46 | 1 K.L <b>L</b> EKT <b>MMQK</b> .Y 2 Oxidation (M) |
| 476 - 485   | 1193.5664 | 1192.5591 | 1192.5468 | 10  | 1 K. <b>MKDEEALQMV</b> .-                         |
| 478 - 485   | 934.5047  | 933.4975  | 933.4113  | 92  | 0 K. <b>DEEALQMV</b> .-                           |

Spot No.: **181**

Mascot score: **276**    Sequence coverage %: **49**

NCBI accession No.: **gi| 27752799**

Matched peptides No.: **35**

Total peptides No.: **127**

Calculated Mr: **47920**

Calculated pI: **6.12**

### Annotated PMF spectra:

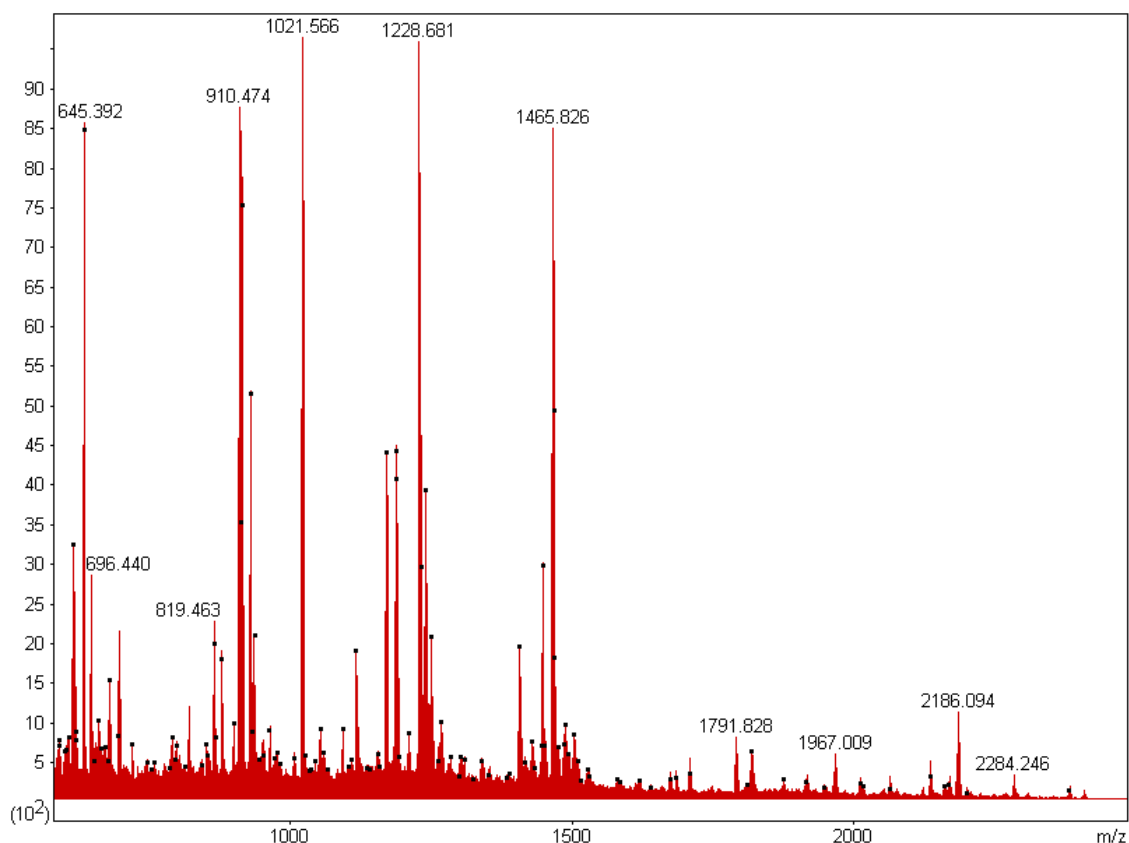

### Probability Based Mowse Score:

Protein score is  $-10 \cdot \log(P)$ , where P is the probability that the observed match is a random event. Protein scores greater than 72 are significant ( $p < 0.05$ ).

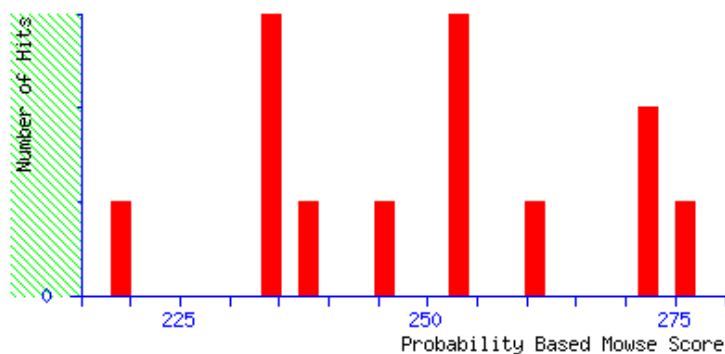

## Matched peptide sequences: shown in **Bold Red**

**1** **KLTYTPEYE** **TKDTDILAAF** **RVTPQGVPP** EEAGA AVAAE SSTGTWTTVW  
**51** TDGLTSLDRY KGRCYHIEPV PGEETQFIAY VAYPLDLFEE GSVTNMFTSI  
**101** VGNVFGFKAL **AALRLEDLRI** **PPAYTKTFQG** **PPHGIQVERD** **KLNKYGRPLL**  
**151** GCTIKPKLGL **SAKNYGRAVY** **ECLRGGLDFT** **KDDENVNSQP** **FMRWRDRFLF**  
**201** **CAEAIYKSQA** **ETGEIKGHYL** **NATAGTCEEM** **IKRAVFAREL** **GVPIVMHDYL**  
**251** TGGFTANTSL SHYCRDNGLL **LHIHRAMHAV** **IDRQKNHGMH** **FRVLAKALRL**  
**301** **SGGDHIHAGT** **VVGKLEGDRE** **STLGFVDLLR** DDYVEKDRSR GIFFTQDWVS  
**351** LPGVLPVASG GIHVWHMPAL TEIFGDDSVL QFGGGTLGHP WGNAPGAVAN  
**401** **RVALEACVQA** **RNEGRDLAVE** **GNEIIREACK**

## Matched peptides information:

| Start - End | Observed  | Mr(expt)  | Mr(calc)  | ppm | Miss | Sequence                               |
|-------------|-----------|-----------|-----------|-----|------|----------------------------------------|
| 2 - 12      | 1407.6910 | 1406.6837 | 1406.6605 | 16  | 0    | K.LTYTPEYETK.D                         |
| 13 - 21     | 1021.5664 | 1020.5591 | 1020.5240 | 34  | 0    | K.DTDILAAFR.V                          |
| 109 - 114   | 614.4297  | 613.4224  | 613.3911  | 51  | 0    | K.ALAALR.L                             |
| 109 - 119   | 1240.7712 | 1239.7639 | 1239.7299 | 27  | 1    | K.ALAALRLEDLR.I                        |
| 115 - 119   | 645.3922  | 644.3849  | 644.3493  | 55  | 0    | R.LEDLR.I                              |
| 120 - 126   | 789.4398  | 788.4325  | 788.4432  | -14 | 0    | R.IPPAYTK.T                            |
| 127 - 139   | 1465.8260 | 1464.8187 | 1464.7474 | 49  | 0    | K.TFQGGPPHGIQVER.D                     |
| 127 - 141   | 1708.9505 | 1707.9432 | 1707.8693 | 43  | 1    | K.TFQGGPPHGIQVERDK.L                   |
| 158 - 163   | 588.3508  | 587.3435  | 587.3642  | -35 | 0    | K.LGLSAK.N                             |
| 168 - 174   | 910.4742  | 909.4669  | 909.4378  | 32  | 0    | R.AVYECLR.G                            |
| 175 - 193   | 2170.0637 | 2169.0564 | 2168.9797 | 35  | 1    | R.GGLDFTKDDENVNSQPQFMR.W               |
| 175 - 193   | 2186.0938 | 2185.0865 | 2184.9746 | 51  | 1    | R.GGLDFTKDDENVNSQPQFMR.W Oxidation (M) |
| 182 - 193   | 1451.7019 | 1450.6946 | 1450.6147 | 55  | 0    | K.DDENVNSQPQFMR.W                      |
| 182 - 193   | 1467.7661 | 1466.7588 | 1466.6096 | 102 | 0    | K.DDENVNSQPQFMR.W Oxidation (M)        |
| 194 - 197   | 632.3617  | 631.3544  | 631.3190  | 56  | 1    | R.WRDR.F                               |
| 198 - 207   | 1261.6589 | 1260.6516 | 1260.6213 | 24  | 0    | R.FLFCAEAIYK.S                         |
| 208 - 216   | 962.4861  | 961.4788  | 961.4716  | 7   | 0    | K.SQAETGEIK.G                          |
| 217 - 232   | 1810.8806 | 1809.8733 | 1809.8026 | 39  | 0    | K.GHYLNATAGTCEEMIK.R Oxidation (M)     |
| 217 - 233   | 1967.0088 | 1966.0015 | 1965.9037 | 50  | 1    | K.GHYLNATAGTCEEMIKR.A Oxidation (M)    |
| 266 - 275   | 1187.6923 | 1186.6850 | 1186.6571 | 24  | 0    | R.DNGLLLHIHR.A                         |
| 276 - 283   | 912.4961  | 911.4888  | 911.4647  | 26  | 0    | R.AMHAVIDR.Q                           |
| 276 - 283   | 928.4888  | 927.4815  | 927.4596  | 24  | 0    | R.AMHAVIDR.Q Oxidation (M)             |
| 284 - 292   | 1154.5621 | 1153.5548 | 1153.5563 | -1  | 1    | R.QKNHGMHFR.V                          |
| 284 - 292   | 1170.6472 | 1169.6399 | 1169.5512 | 76  | 1    | R.QKNHGMHFR.V Oxidation (M)            |
| 286 - 292   | 898.4459  | 897.4386  | 897.4028  | 40  | 0    | K.NHGMHFR.V                            |
| 286 - 292   | 914.4437  | 913.4364  | 913.3977  | 42  | 0    | K.NHGMHFR.V Oxidation (M)              |
| 286 - 296   | 1325.6517 | 1324.6444 | 1324.6823 | -29 | 1    | K.NHGMHFRVLAK.A Oxidation (M)          |
| 300 - 314   | 1447.8007 | 1446.7934 | 1446.7579 | 25  | 0    | R.LSGGDHIHAGTVVGK.L                    |
| 300 - 319   | 2018.0969 | 2017.0896 | 2017.0341 | 28  | 1    | R.LSGGDHIHAGTVVGKLEGDR.E               |
| 315 - 319   | 589.3404  | 588.3331  | 588.2867  | 79  | 0    | K.LEGDR.E                              |
| 315 - 330   | 1820.0329 | 1819.0256 | 1818.9476 | 43  | 1    | K.LEGDRESTLGFVDLLR.D                   |
| 320 - 330   | 1249.6985 | 1248.6912 | 1248.6714 | 16  | 0    | R.ESTLGFVDLLR.D                        |
| 402 - 411   | 1116.6053 | 1115.5980 | 1115.5757 | 20  | 0    | R.VALEACVQAR.N                         |
| 412 - 426   | 1684.9266 | 1683.9193 | 1683.8540 | 39  | 1    | R.NEGRDLAVEGNEIIR.E                    |
| 416 - 426   | 1228.6809 | 1227.6736 | 1227.6459 | 23  | 0    | R.DLAVEGNEIIR.E                        |

Spot No.: **182**

Mascot score: **94**

Sequence coverage %: **29**

NCBI accession No.: **gi| 3121825**

Matched peptides No.: **8**

Total peptides No.: **15**

Calculated Mr: **29049**

Calculated pI: **7.70**

### Annotated PMF spectra:

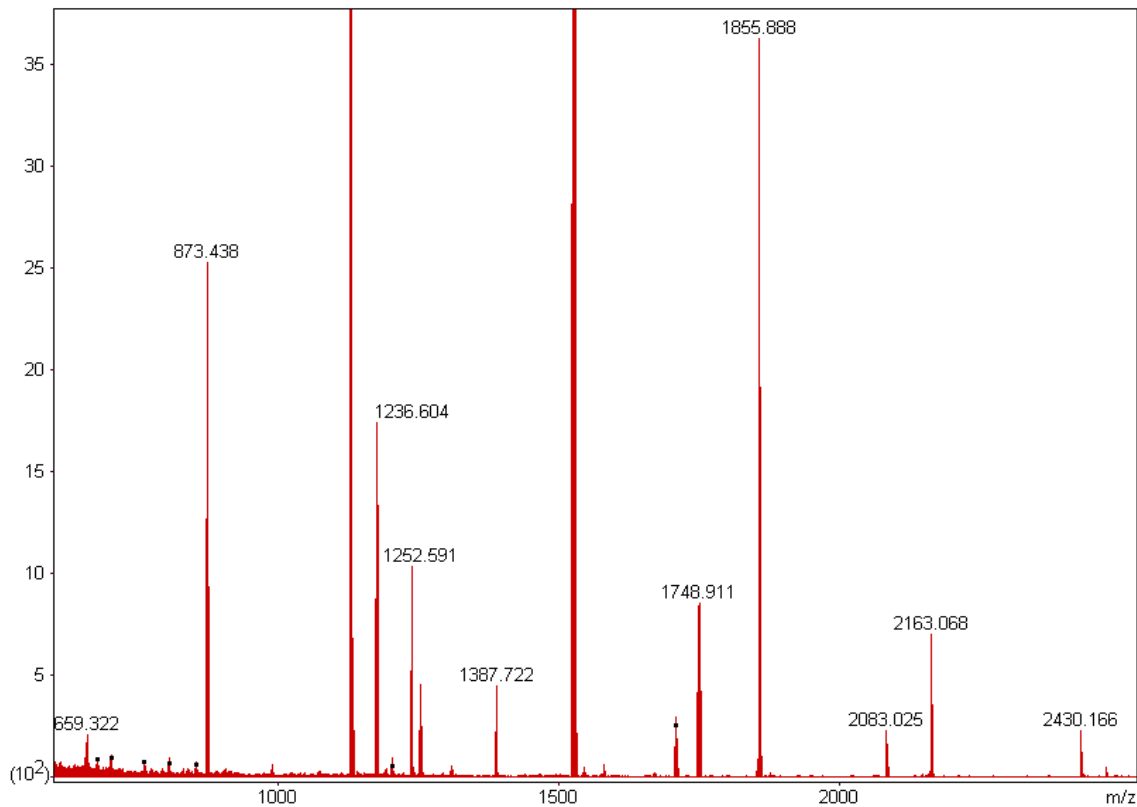

### Probability Based Mowse Score:

Protein score is  $-10 \cdot \log(P)$ , where P is the probability that the observed match is a random event. Protein scores greater than 72 are significant ( $p < 0.05$ ).

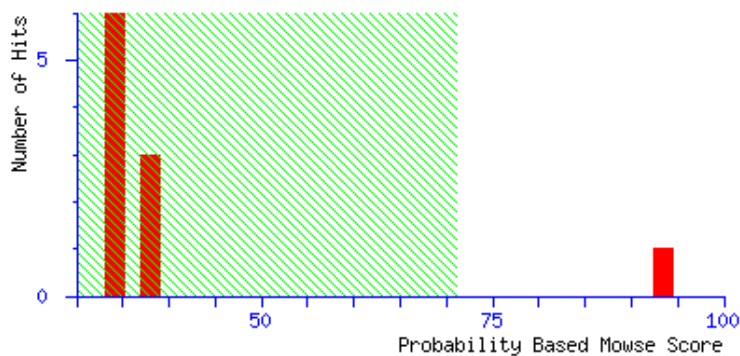

Matched peptide sequences: shown in **Bold Red**

```
1 MACVASSTTL ISSPSSRVFP AKSSLSSPSV SFLRTLSSPS ASASLRSGFA
51 RRSSLSTSR RSFAVKAQAD DLPLVGNKAP DFEAEAVFDQ EFIKVKLSDY
101 IGKKYVILFF YPLDFTFVCP TEITAFSDRH SEFEKLNTEV LGVSVDSVFS
151 HLAWVQTDRK SGGGLDLYNP LISDVTKSIS KSGVLIHDQ GIALRGLFII
201 DKEGVIQHST INNLGIGRSV DETMRTLQAL QYTGNPDEVC PAGWKPEKES
251 MKPDPKLSKE YFSAI
```

Matched peptides information:

| Start - End | Observed  | Mr(expt)  | Mr(calc)  | ppm  | Miss | Sequence                            |
|-------------|-----------|-----------|-----------|------|------|-------------------------------------|
| 79 - 94     | 1855.8522 | 1854.8449 | 1854.8676 | -12  | 0    | K.APDFEAEAVFDQ <b>EFIK.V</b>        |
| 160 - 177   | 1877.8816 | 1876.8743 | 1875.9942 | 269  | 1    | R.KSGGLDLYNP <b>LISDVTK.S</b>       |
| 161 - 177   | 1748.8496 | 1747.8423 | 1747.8992 | -33  | 0    | K.SGGGLDLYNP <b>LISDVTK.S</b>       |
| 182 - 195   | 1525.7985 | 1524.7912 | 1524.8413 | -33  | 0    | K.SFGVLIHDQ <b>GIALR.G</b>          |
| 196 - 202   | 805.3134  | 804.3061  | 804.4745  | -209 | 0    | R.GLFIIDK <b>E</b>                  |
| 196 - 218   | 2495.4287 | 2494.4214 | 2493.3703 | 222  | 1    | R.GLFIID <b>KEGVIQHSTINNLGIGR.S</b> |
| 203 - 218   | 1707.8212 | 1706.8139 | 1706.9064 | -54  | 0    | K.EGVIQHSTIN <b>NLGIGR.S</b>        |
| 219 - 225   | 853.2713  | 852.2640  | 852.3647  | -118 | 0    | R.SV <b>DETMR.T</b> Oxidation (M)   |

Spot No.: **183**

Mascot score: **94** Sequence coverage %: **29**

NCBI accession No.: **gi| 1498198**

Matched peptides No.: **8**

Total peptides No.: **12**

Calculated Mr: **28966**

Calculated pI: **8.76**

### Annotated PMF spectra:

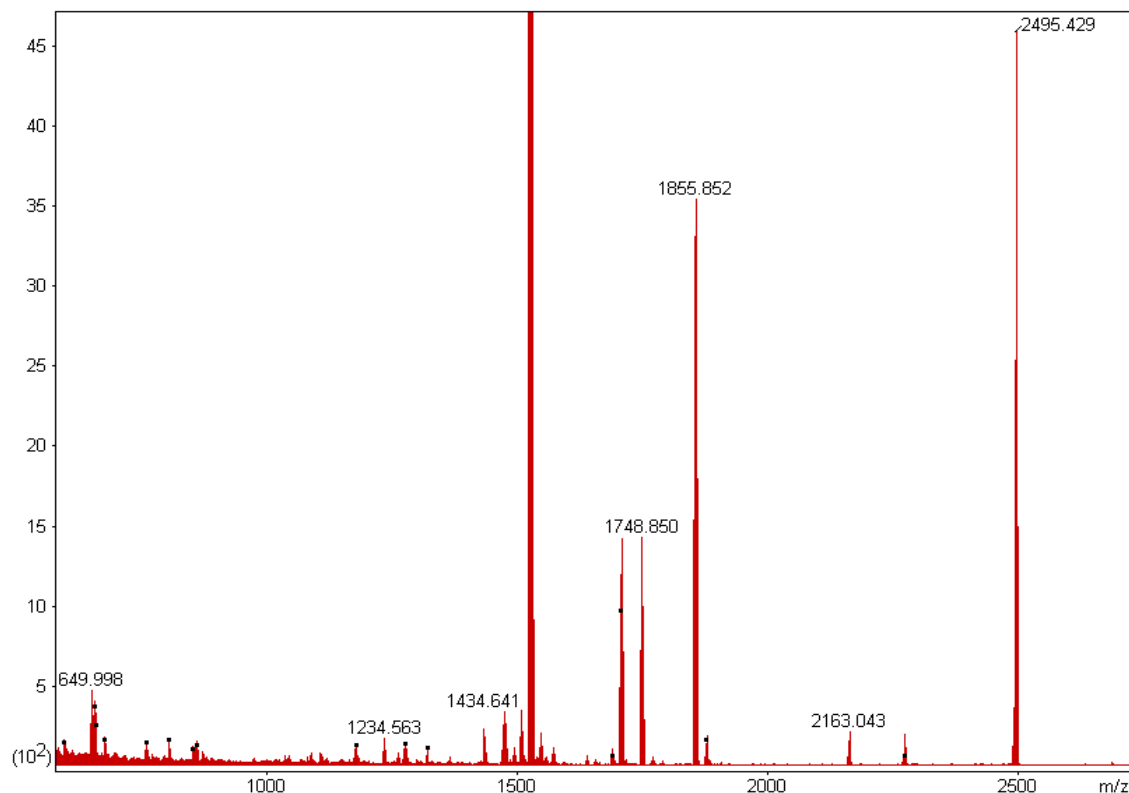

### Probability Based Mowse Score:

Protein score is  $-10 \cdot \log(P)$ , where P is the probability that the observed match is a random event. Protein scores greater than 72 are significant ( $p < 0.05$ ).

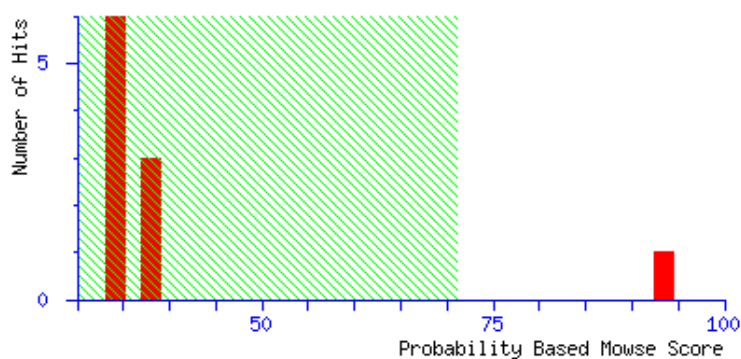

Matched peptide sequences: shown in **Bold Red**

```
1 MASVASSTTL ISSPSSRVFP AKSSLSSPSV SFLRTLSSPS ASASLRSGFA
51 RRSSLSSTSR RSFAVKAQAD DLPLVGNKAP DFKAEAVFDQ EFIKVKLSDY
101 NGKKYVILFF YPLDFTFVCP TEITAFSDRH SEFEKLNTEV LGVSVDSVFS
151 HLAWVQTDRK SGGLGDLNYP LISDVTKSIS KSGVLIHDQ GIALRGLFII
201 DKEGVIQHST INNLGIGRSV DETMRTLQAL QYTGNPDEVC PAGWKSGEKS
251 MKPDPKLSKE YFSAI
```

Matched peptides information:

| Start - End | Observed  | Mr (expt) | Mr (calc) | ppm  | Miss | Sequence                           |
|-------------|-----------|-----------|-----------|------|------|------------------------------------|
| 79 - 94     | 1855.8522 | 1854.8449 | 1853.9200 | 299  | 1    | <b>K.APDFKAEAVFDQEFIK.V</b>        |
| 160 - 177   | 1877.8816 | 1876.8743 | 1875.9942 | 269  | 1    | <b>R.KSGGLGDLNYPLISDVTK.S</b>      |
| 161 - 177   | 1748.8496 | 1747.8423 | 1747.8992 | -33  | 0    | <b>K.SGGLGDLNYPLISDVTK.S</b>       |
| 182 - 195   | 1525.7985 | 1524.7912 | 1524.8413 | -33  | 0    | <b>K.SFGVLIHDQGIALR.G</b>          |
| 196 - 202   | 805.3134  | 804.3061  | 804.4745  | -209 | 0    | <b>R.GLFIIDK.E</b>                 |
| 196 - 218   | 2495.4287 | 2494.4214 | 2493.3703 | 222  | 1    | <b>R.GLFIIDKEGVIQHSTINNLGIGR.S</b> |
| 203 - 218   | 1707.8212 | 1706.8139 | 1706.9064 | -54  | 0    | <b>K.EGVIQHSTINNLGIGR.S</b>        |
| 219 - 225   | 853.2713  | 852.2640  | 852.3647  | -118 | 0    | <b>R.SVDETMR.T Oxidation (M)</b>   |

Spot No.: **184**

Mascot score: **116**    Sequence coverage %: **48**

NCBI accession No.: **gi| 15231176**

Matched peptides No.: **10**

Total peptides No.: **30**

Calculated Mr: **19574**

Calculated pI: **5.09**

### Annotated PMF spectra:

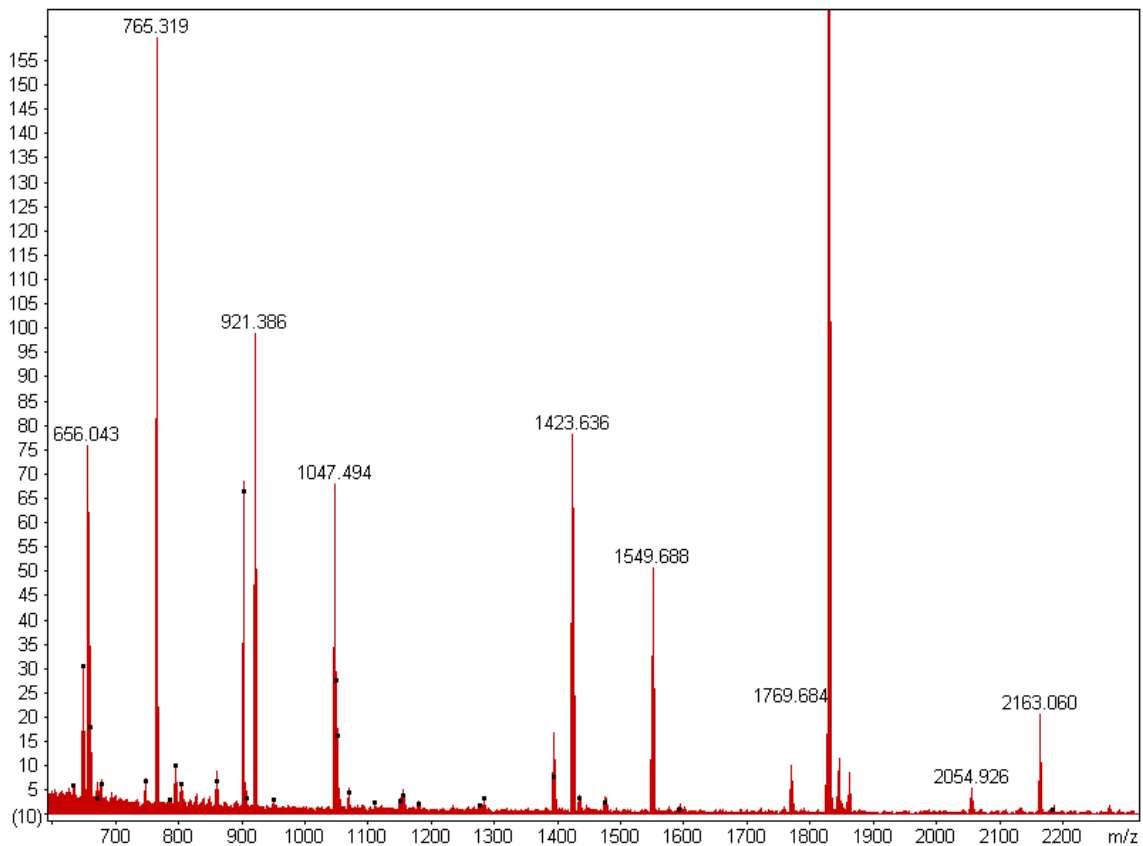

### Probability Based Mowse Score:

Protein score is  $-10 \cdot \log(P)$ , where P is the probability that the observed match is a random event. Protein scores greater than 72 are significant ( $p < 0.05$ ).

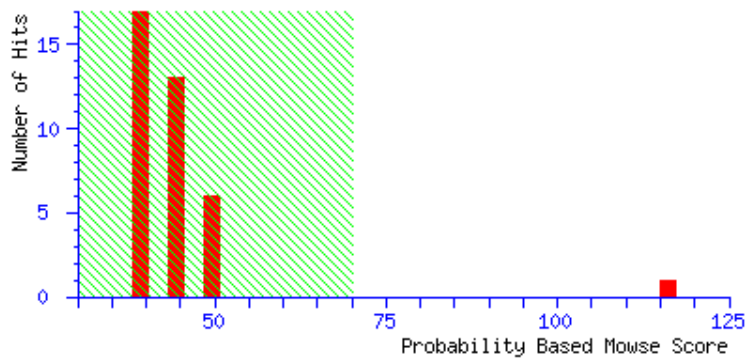



Matched peptide sequences: shown in **Bold Red**

1 MSGAGKKIAD VAFKAS**TID WDGMAKVLVT DEARREFSNL RRAFDEVNTQ**  
51 **LQTKFSQEPE PIDWDYYRKG** IGAGIVDKYK EAYDSIEIPK YVDKVTPEYK  
101 PK**FDALLVEL KEAEQKSLKE** SERLEKEIAD VQEIS**KKLST MTADEYFEKH**  
151 **PELKKKFDDE IRNDNWGY**

Matched peptides information:

| Start - End | Observed  | Mr(expt)  | Mr(calc)  | ppm  | Miss Sequence                         |
|-------------|-----------|-----------|-----------|------|---------------------------------------|
| 18 - 26     | 1052.3842 | 1051.3769 | 1051.4644 | -83  | 0 R.TIDWDGMAK.V Oxidation (M)         |
| 27 - 34     | 902.4150  | 901.4078  | 901.4869  | -88  | 0 K.VLVTDEAR.R                        |
| 36 - 41     | 765.3186  | 764.3113  | 764.3817  | -92  | 0 R.EFSNLR.R                          |
| 36 - 42     | 921.3857  | 920.3784  | 920.4828  | -113 | 1 R.EFSNLR.R.A                        |
| 42 - 54     | 1549.6883 | 1548.6810 | 1548.7896 | -70  | 1 R.RAFDEVNTQLQTK.F                   |
| 43 - 54     | 1393.5747 | 1392.5674 | 1392.6885 | -87  | 0 R.AFDEVNTQLQTK.F                    |
| 55 - 68     | 1844.7592 | 1843.7519 | 1843.8053 | -29  | 0 K.FSQEPEPIDWDYYR.K                  |
| 103 - 111   | 1047.4944 | 1046.4871 | 1046.6012 | -109 | 0 K.FDALLVELK.E                       |
| 138 - 154   | 2054.9262 | 2053.9189 | 2053.9666 | -23  | 1 K.LSTMTADEYFEKHPELK.K Oxidation (M) |
| 157 - 162   | 794.2927  | 793.2854  | 793.3606  | -95  | 0 K.FDDEIR.N                          |

Spot No.: **185**

Mascot score: **156**    Sequence coverage %: **45**

NCBI accession No.: **gi| 15239282**

Matched peptides No.: **19**

Total peptides No.: **49**

Calculated Mr: **40643**

Calculated pI: **8.32**

### Annotated PMF spectra:

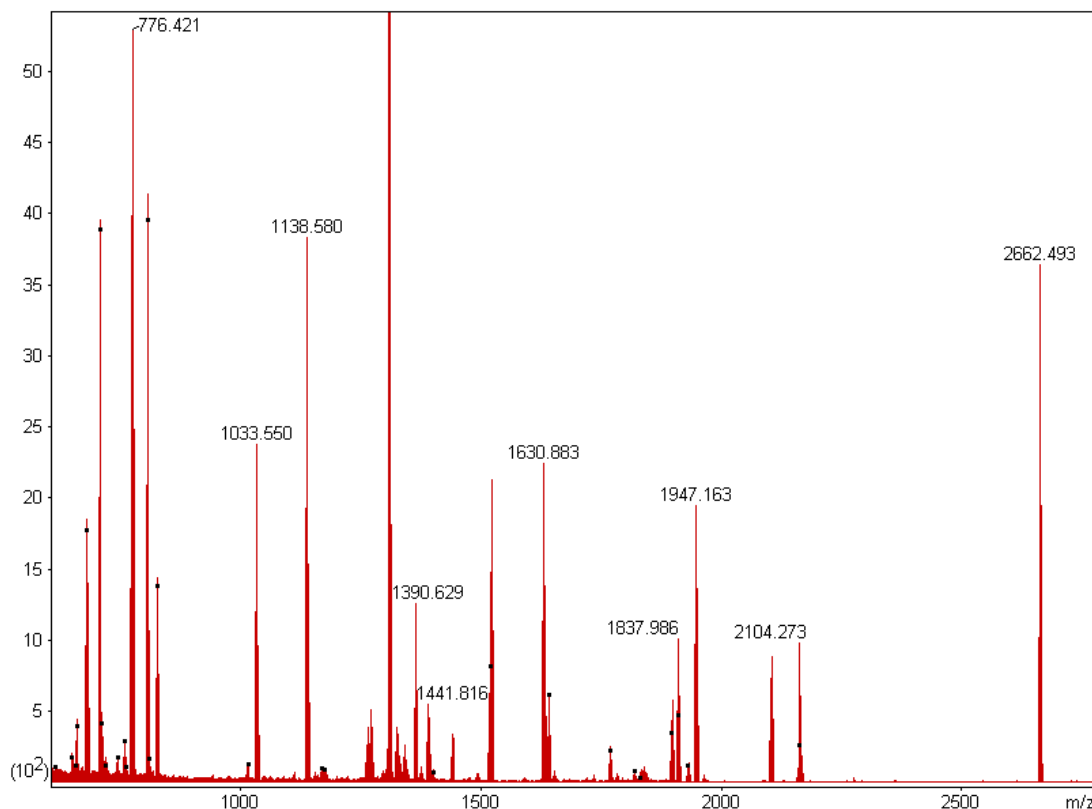

### Probability Based Mowse Score:

Protein score is  $-10 \cdot \log(P)$ , where P is the probability that the observed match is a random event. Protein scores greater than 72 are significant ( $p < 0.05$ ).

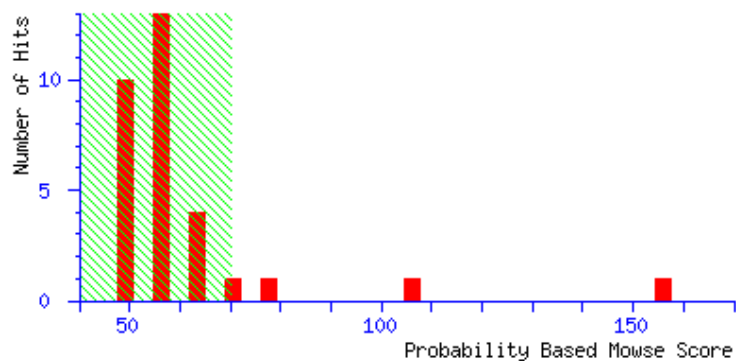

## Matched peptide sequences: shown in **Bold Red**

**1** **MAAAISAAVS LPSSK**SSLL TKISSVSPQR IFLKKSTVCY RRVVSVKAQV  
**51** TTDTEAPPV KVKESKK**QE EGI**VVNKFKP **KNPYTGR**CLL NTKITGDDAP  
**101** GETWHIVFTT EGEVPYR**EGQ SIG**VIPEGID **KNGKPHKLRL YSIASSAIGD**  
**151** **FGDSK**TVSLC VKRLVYTNDG GEIVK**GVCSN FL**CDLKP**GDE AKITGPV**GKE  
**201** **MLMPK**DPNAT IIMLTGTGI APFRSFLW**KM FFE**EHEDYKF NGLAWLFLGV  
**251** PTSSSLYKE EFEKMKEKNP DNFR**LDFAVS RE**QTNEKGEK **MYIQTRMAEY**  
**301** **AEELWELLK DNTFV**YMCGL **KGMEK**GIDDI MVSLAA**KDGI DW**LEYKKQLK  
**351** **RSEQWN**VEVY

## Matched peptides information:

| Start - End | Observed  | Mr(expt)  | Mr(calc)  | ppm | Miss | Sequence                               |
|-------------|-----------|-----------|-----------|-----|------|----------------------------------------|
| 2 - 15      | 1272.6370 | 1271.6297 | 1271.7085 | -62 | 0    | <b>M.AAAISAAVSLPSSK.S</b>              |
| 69 - 77     | 1015.5140 | 1014.5067 | 1014.5346 | -27 | 0    | <b>K.QEEGI</b> VVNK.F                  |
| 82 - 87     | 707.3896  | 706.3823  | 706.3398  | 60  | 0    | <b>K.NPYTGR.C</b>                      |
| 118 - 131   | 1441.8165 | 1440.8092 | 1440.7460 | 44  | 0    | <b>R.EGQSIG</b> VIPEGIDK.N             |
| 132 - 137   | 680.4021  | 679.3948  | 679.3765  | 27  | 0    | <b>K.NGKPHK.L</b>                      |
| 140 - 155   | 1630.8828 | 1629.8755 | 1629.7886 | 53  | 0    | <b>R.LYSIASSAIGDFGDSK.T</b>            |
| 176 - 192   | 1910.0109 | 1909.0036 | 1908.8710 | 69  | 0    | <b>K.GVCSNFLCDLKP</b> GDEAK.I          |
| 193 - 205   | 1400.7542 | 1399.7469 | 1399.7567 | -7  | 1    | <b>K.ITGPV</b> GKEM <b>LMPK.D</b>      |
| 230 - 239   | 1374.6482 | 1373.6409 | 1373.5598 | 59  | 0    | <b>K.MFFE</b> EHEDYK.F                 |
| 230 - 239   | 1390.6288 | 1389.6215 | 1389.5547 | 48  | 0    | <b>K.MFFE</b> EHEDYK.F Oxidation (M)   |
| 275 - 281   | 807.4803  | 806.4730  | 806.4286  | 55  | 0    | <b>R.LDFAVSR.E</b>                     |
| 291 - 296   | 811.4411  | 810.4338  | 810.4058  | 35  | 0    | <b>K.MYIQTR.M</b>                      |
| 291 - 296   | 827.4341  | 826.4268  | 826.4007  | 32  | 0    | <b>K.MYIQTR.M</b> Oxidation (M)        |
| 297 - 309   | 1640.8870 | 1639.8797 | 1639.7803 | 61  | 0    | <b>R.MAEYAEELWELLK.K</b> Oxidation (M) |
| 297 - 310   | 1768.9945 | 1767.9872 | 1767.8753 | 63  | 1    | <b>R.MAEYAEELWELLK.D</b> Oxidation (M) |
| 311 - 321   | 1347.6761 | 1346.6688 | 1346.5999 | 51  | 0    | <b>K.DNTFV</b> YMCGLK.G                |
| 338 - 346   | 1138.5802 | 1137.5729 | 1137.5342 | 34  | 0    | <b>K.DGIDW</b> LEYK.K                  |
| 338 - 347   | 1266.6620 | 1265.6547 | 1265.6292 | 20  | 1    | <b>K.DGIDW</b> LEYK.Q                  |
| 351 - 360   | 1309.6883 | 1308.6810 | 1308.6098 | 54  | 1    | <b>K.RSEQWN</b> VEVY.-                 |

Spot No.: **186**

Mascot score: **85**    Sequence coverage %: **25**

NCBI accession No.: **gi| 84468402**

Matched peptides No.: **8**

Total peptides No.: **18**

Calculated Mr: **33553**

Calculated pI: **4.55**

### Annotated PMF spectra:

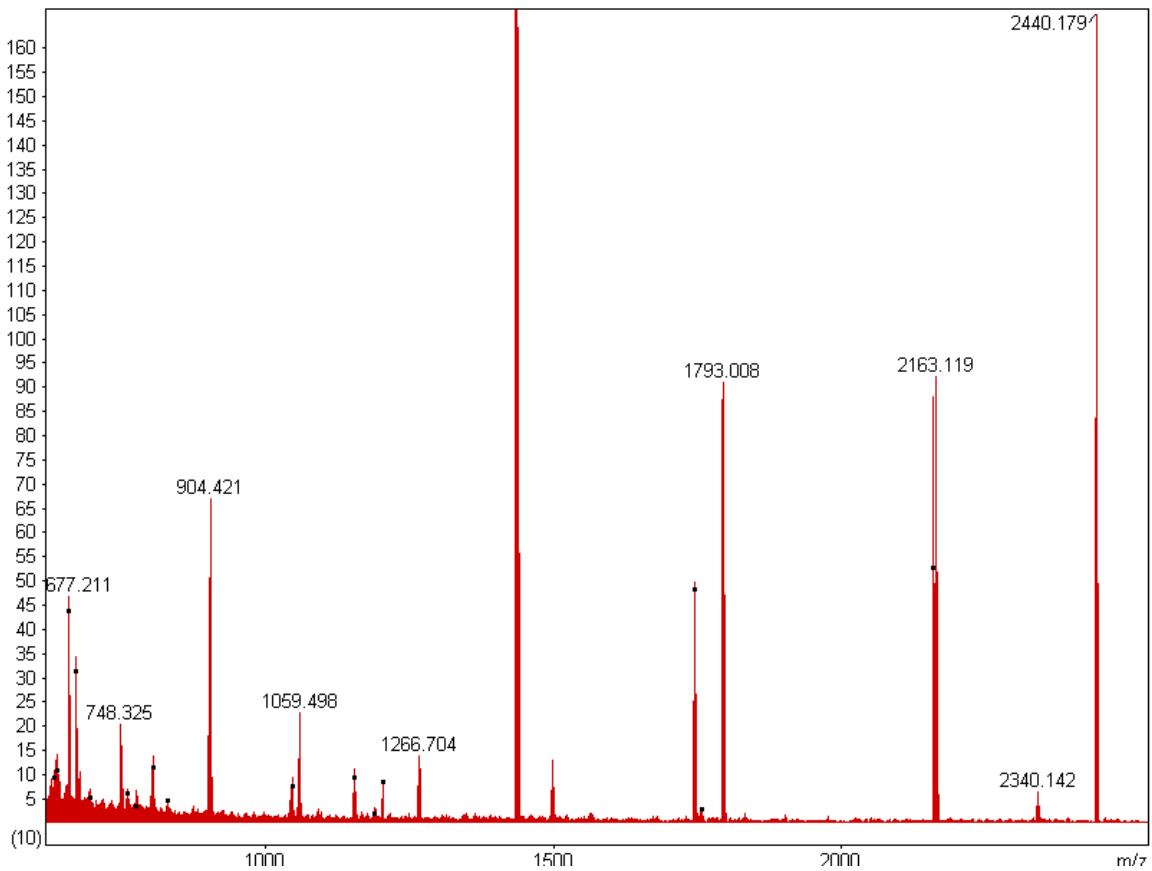

### Probability Based Mowse Score:

Protein score is  $-10 \cdot \log(P)$ , where P is the probability that the observed match is a random event. Protein scores greater than 72 are significant ( $p < 0.05$ ).

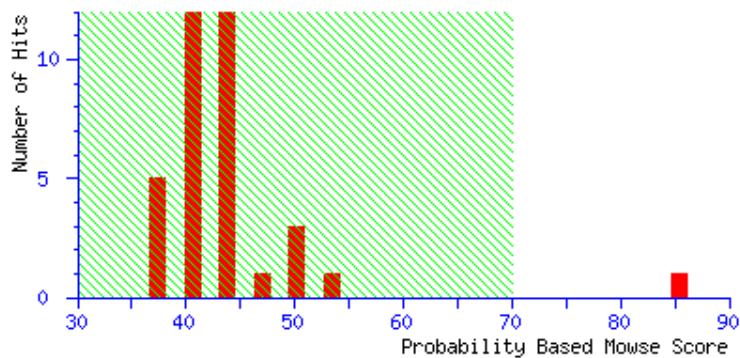

Matched peptide sequences: shown in **Bold Red**

```

1 MEFWGTEVKS GESLKVEPED DKIIHLSAAC LGEVSKDKGG EPVSLYVKID
51 NQKLQLGILS SEKIPQISFD LVFEKEFELS HNWKYGSIFF TGFKMESLLV
101 SDDDEDSDDS IEEDNPNVAA NGKPEVEVKN GAKPGVNEAQ QNKTSDPKKK
151 QKDIENDVSA DDEEDSSETD SDEDSSEDEP VANGQIESSD DEDDSEEDDE
201 DSDDEETPKK TEGGTRKRAE SSKKTPVAVK RAKFATPEKT GSKNGVHVDI
251 PYPKQIVKSG ANNKPPMKQQ TPQSTGDYSC KPCKRSFKTE DALGSHNRAK
301 HSAK

```

Matched peptides information:

| Start - End | Observed  | Mr(expt)  | Mr(calc)  | ppm  | Miss Sequence |                                           |
|-------------|-----------|-----------|-----------|------|---------------|-------------------------------------------|
| 1 - 15      | 1743.9520 | 1742.9447 | 1742.8185 | 72   | 1             | -.MEFWGTEVKS <b>GESLK.V</b> Oxidation (M) |
| 23 - 36     | 1497.6973 | 1496.6900 | 1496.8021 | -75  | 0             | K.IIHLSAACL <b>GEVSK.D</b>                |
| 49 - 53     | 617.1900  | 616.1828  | 616.3180  | -219 | 0             | K.IDNQK.L                                 |
| 64 - 75     | 1435.7105 | 1434.7032 | 1434.7759 | -51  | 0             | K.IPQISFDLV <b>FEK.E</b>                  |
| 76 - 84     | 1189.6505 | 1188.6432 | 1188.5564 | 73   | 0             | K.EFELSHNWK.Y                             |
| 211 - 217   | 748.3252  | 747.3179  | 747.3875  | -93  | 1             | K.TEGGTRK.V                               |
| 217 - 223   | 776.2838  | 775.2765  | 775.4188  | -183 | 1             | K.RVAESSK.K                               |
| 259 - 268   | 1059.4975 | 1058.4902 | 1058.5179 | -26  | 0             | K.SGANNKPPMK.Q Oxidation (M)              |

Spot No.: **187**

Mascot score: **88**    Sequence coverage %: **29**

NCBI accession No.: **gi| 15232645**

Matched peptides No.: **8**

Total peptides No.: **25**

Calculated Mr: **27743**

Calculated pI: **7.79**

### Annotated PMF spectra:

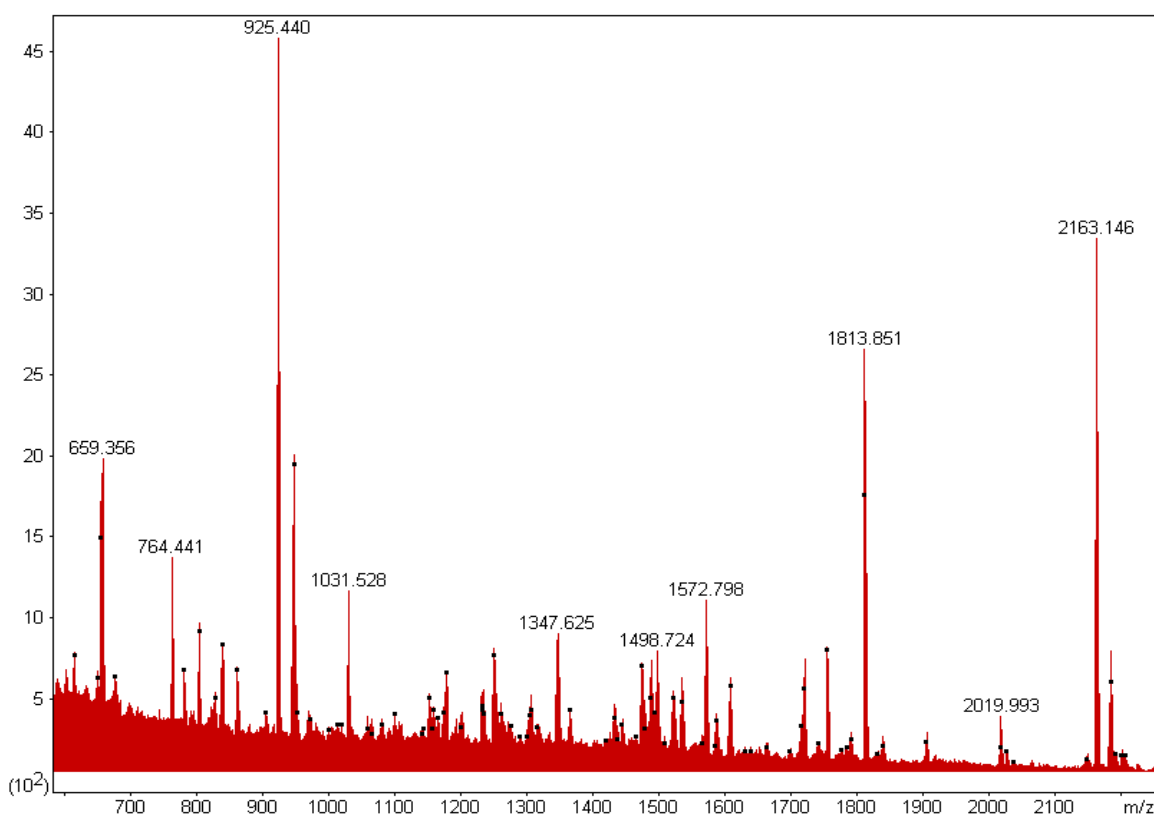

### Probability Based Mowse Score:

Protein score is  $-10 \cdot \log(P)$ , where P is the probability that the observed match is a random event. Protein scores greater than 72 are significant ( $p < 0.05$ ).

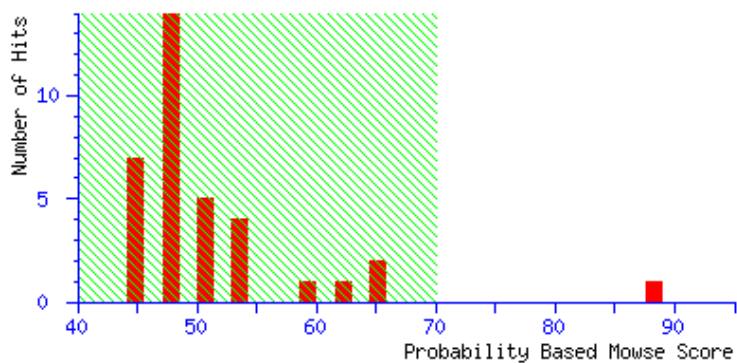

Matched peptide sequences: shown in **Bold Red**

**1 MSYSRQSMGS GSRSTR**GYEF GR**TYVVRPKG** KHQATIVWLH GLGDMGSSSS  
**51 QLLESLPLPN IKWICPTAPS RPVSLLGGFP** CTAWFDVGEI SEDLHDDIEG  
**101 LDASAAHIAN LLSAEPTDVK VGIGGFSMGA** AIALYSTTCY ALGR**YGTGHA**  
**151 YTINLRATVG LSGWLPWRS LRSKIESSNE** VARRAASIPI LLAHGTSDDV  
**201 VPYRFGEKSA HSLAMAGFR**Q TMFKPYEGLG HYTVPKEMDE VVHWLVSRIG  
**251 LEGSR**

Matched peptides information:

| Start - End | Observed  | Mr(expt)  | Mr(calc)  | ppm  | Miss | Sequence                |
|-------------|-----------|-----------|-----------|------|------|-------------------------|
| 1 - 5       | 659.3563  | 658.3490  | 658.2744  | 113  | 0    | -.MSYSR.Q Oxidation (M) |
| 1 - 13      | 1433.7223 | 1432.7150 | 1432.6187 | 67   | 1    | -.MSYSRQSMGSGSR.S       |
| 6 - 16      | 1153.5505 | 1152.5432 | 1152.5306 | 11   | 1    | R.QSMGSGSRSTR.G         |
| 23 - 29     | 862.3890  | 861.3818  | 861.5072  | -146 | 0    | R.TYVVRPK.G             |
| 145 - 156   | 1365.6462 | 1364.6389 | 1364.6837 | -33  | 0    | R.YGTGHAYTINLR.A        |
| 157 - 172   | 1755.8688 | 1754.8615 | 1754.9580 | -55  | 1    | R.ATVGLSGWLPWRSR.S      |
| 175 - 184   | 1160.5210 | 1159.5137 | 1159.5945 | -70  | 1    | K.IESSNEVARR.A          |
| 205 - 219   | 1608.7953 | 1607.7880 | 1607.7878 | 0    | 1    | R.FGEKSAHSLAMAGFR.Q     |

Spot No.: **188**

Mascot score: **85**    Sequence coverage %: **51**

NCBI accession No.: **gi| 145334185**

Matched peptides No.: **6**

Total peptides No.: **12**

Calculated Mr: **12734**

Calculated pI: **7.79**

### Annotated PMF spectra:

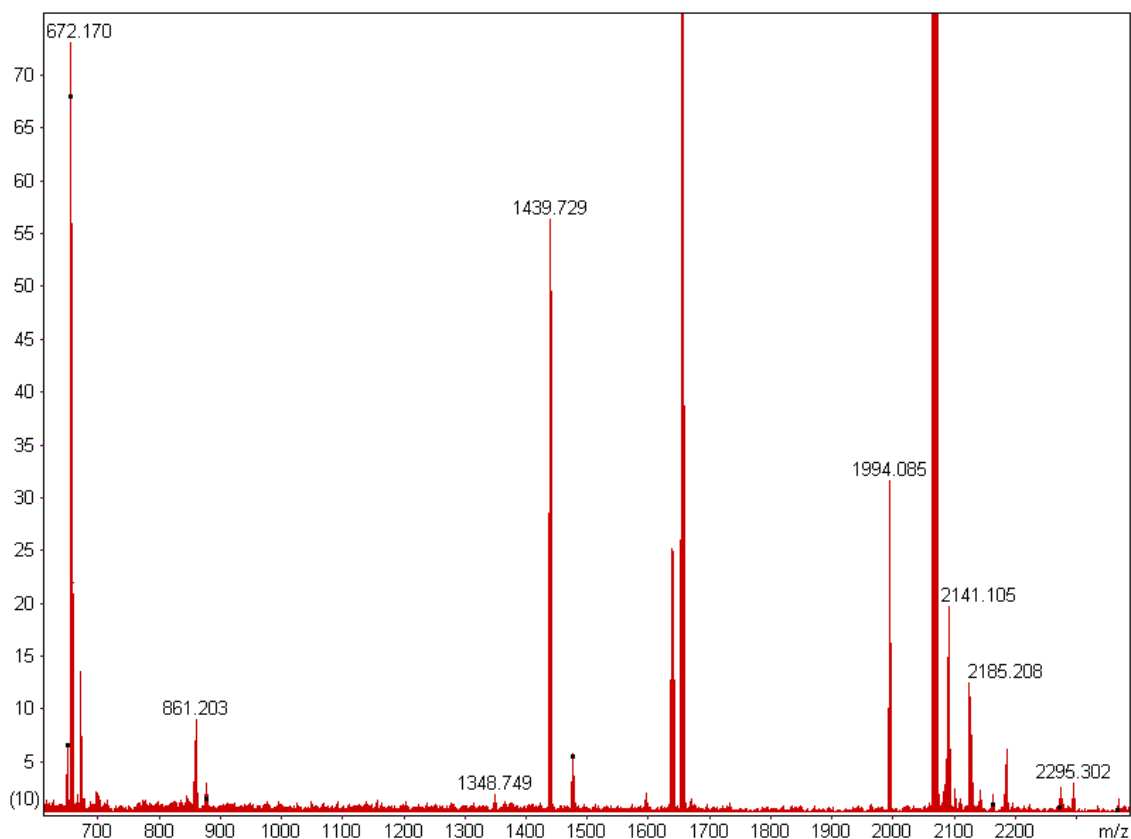

### Probability Based Mowse Score:

Protein score is  $-10 \cdot \log(P)$ , where P is the probability that the observed match is a random event. Protein scores greater than 72 are significant ( $p < 0.05$ ).

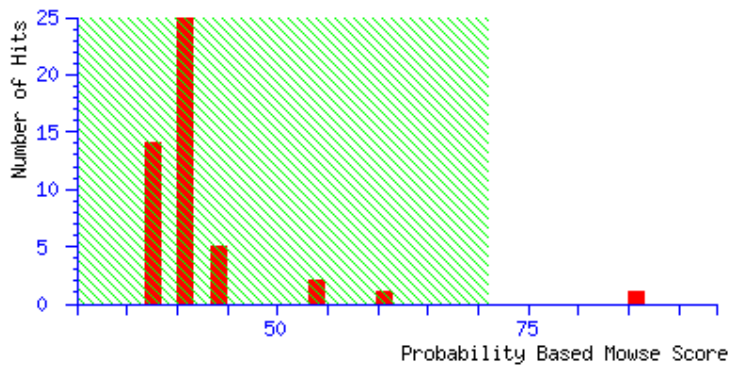



Matched peptide sequences: shown in **Bold Red**

**1 M L T L Q H S S F V S F C P N D N K L R S F A N G V T I M S K R R D F S E K S N E E R P I L R I K V**  
**51 P N T I V A R S A I A V L S L G F I D A G Y S G D W S R I G V I S K E T E E L L K I A A F L V V P L**  
**101 C I F L A L S F S N D S T D**

Matched peptides information:

| Start - End    | Observed         | Mr(expt)         | Mr(calc)         | ppm         | Miss     | Sequence                                                       |
|----------------|------------------|------------------|------------------|-------------|----------|----------------------------------------------------------------|
| <b>1 - 18</b>  | <b>2125.1147</b> | <b>2124.1074</b> | <b>2123.9769</b> | <b>61</b>   | <b>0</b> | <b>-.M L T L Q H S S F V S F C P N D N K . L</b>               |
| <b>1 - 18</b>  | <b>2141.1053</b> | <b>2140.0980</b> | <b>2139.9718</b> | <b>59</b>   | <b>0</b> | <b>-.M L T L Q H S S F V S F C P N D N K . L</b> Oxidation (M) |
| <b>2 - 18</b>  | <b>1994.0852</b> | <b>1993.0779</b> | <b>1992.9364</b> | <b>71</b>   | <b>0</b> | <b>M . L T L Q H S S F V S F C P N D N K . L</b>               |
| <b>19 - 31</b> | <b>1439.7288</b> | <b>1438.7215</b> | <b>1438.7602</b> | <b>-27</b>  | <b>1</b> | <b>K . L R S F A N G V T I M S K . R</b> Oxidation (M)         |
| <b>58 - 78</b> | <b>2185.2082</b> | <b>2184.2009</b> | <b>2184.0851</b> | <b>53</b>   | <b>0</b> | <b>R . S A I A V L S L G F I D A G Y S G D W S R . I</b>       |
| <b>85 - 91</b> | <b>861.2026</b>  | <b>860.1953</b>  | <b>860.4491</b>  | <b>-295</b> | <b>0</b> | <b>K . E T E E L L K . I</b>                                   |

Spot No.: **189**

Mascot score: **89** Sequence coverage %: **32**

NCBI accession No.: **gi| 15223288**

Matched peptides No.: **9**

Total peptides No.: **27**

Calculated Mr: **24640**

Calculated pI: **5.73**

### Annotated PMF spectra:

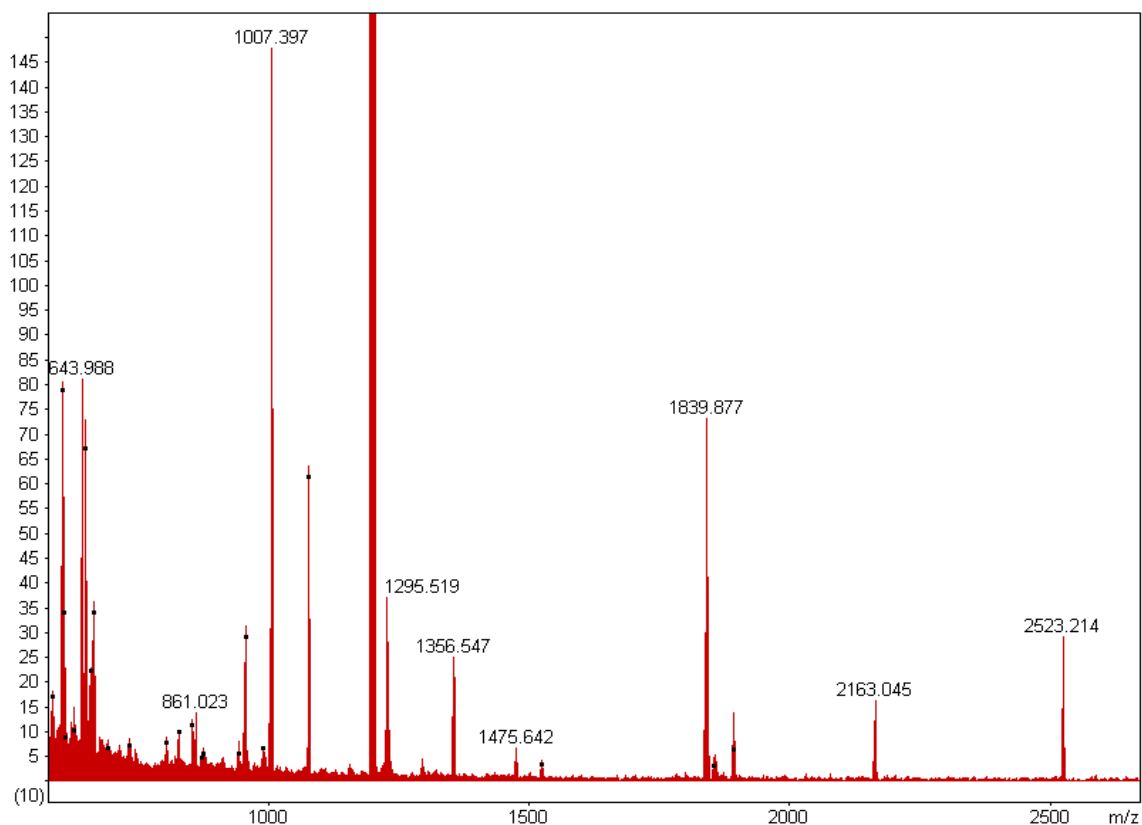

### Probability Based Mowse Score:

Protein score is  $-10 \cdot \log(P)$ , where P is the probability that the observed match is a random event. Protein scores greater than 72 are significant ( $p < 0.05$ ).

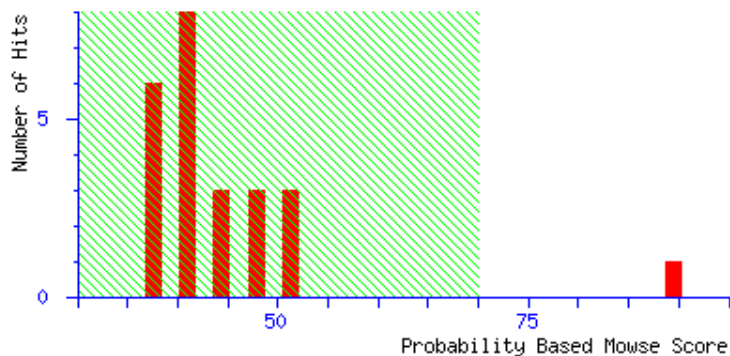

Matched peptide sequences: shown in **Bold Red**

**1** MSEETKDNQR **LQRPAPRLNE** **RILSSLSRRS** VAAHPWHDLE IGPGAPQIFN  
**51** VVVEITKGSK VKYELDK**KTG** **LIKVDRIILYS** **SVVYPHNYGF** **VPRTL**CECDND  
**101** PIDVLVIMQE PVLPGCFLRA RAIGLMPMID QGEKDDK**IIA** **VCVDDPEYKH**  
**151** YTDIK**ELPPH** **RLSEIRRFEE** **DYKKNENKEV** AVNDFLPSES AVEAIQYSMD  
**201** LYAEYILHTL RR

Matched peptides information:

| Start - End | Observed  | Mr(expt)  | Mr(calc)  | ppm  | Miss | Sequence              |
|-------------|-----------|-----------|-----------|------|------|-----------------------|
| 11 - 17     | 837.3993  | 836.3920  | 836.4980  | -127 | 0    | R.LQRPAPR.L           |
| 22 - 28     | 775.3361  | 774.3289  | 774.4599  | -169 | 0    | R.ILSSLSR.R           |
| 68 - 73     | 659.2851  | 658.2778  | 658.4377  | -243 | 1    | K.KTGLIK.V            |
| 77 - 93     | 2011.0447 | 2010.0374 | 2010.0363 | 1    | 0    | R.ILYSSVVYPHNYGFVPR.T |
| 138 - 149   | 1421.6363 | 1420.6290 | 1420.6908 | -43  | 0    | K.IIAVCVDDPEYK.H      |
| 156 - 161   | 748.3218  | 747.3145  | 747.4028  | -118 | 0    | K.ELPPHR.L            |
| 162 - 166   | 617.2342  | 616.2269  | 616.3544  | -207 | 0    | R.LSEIR.R             |
| 167 - 173   | 1004.4161 | 1003.4088 | 1003.4763 | -67  | 1    | R.RFFEDYK.K           |
| 168 - 174   | 976.3845  | 975.3772  | 975.4702  | -95  | 1    | R.RFFEDYKK.N          |

Spot No.: **190**

Mascot score: **109**    Sequence coverage %: **50**

NCBI accession No.: **gi| 18391006**

Matched peptides No.: **11**

Total peptides No.: **43**

Calculated Mr: **20049**

Calculated pI: **5.37**

### Annotated PMF spectra:

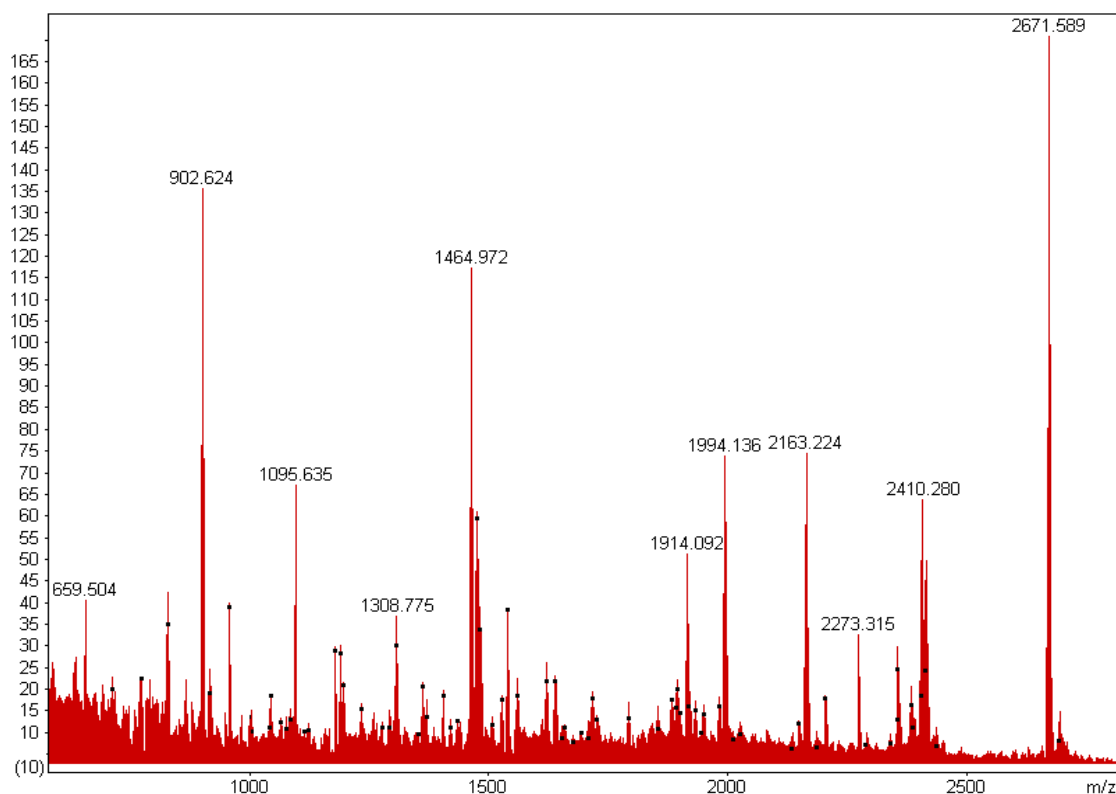

### Probability Based Mowse Score:

Protein score is  $-10 \cdot \log(P)$ , where P is the probability that the observed match is a random event. Protein scores greater than 72 are significant ( $p < 0.05$ ).

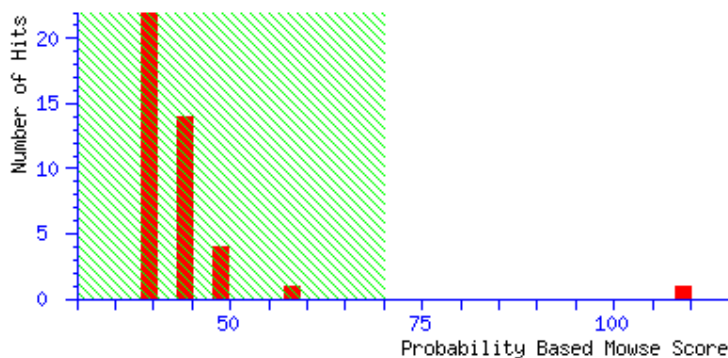

Matched peptide sequences: shown in **Bold Red**

| Start - End      | Observed         | Mr(expt)         | Mr(calc)         | ppm        | Miss Sequence                           |
|------------------|------------------|------------------|------------------|------------|-----------------------------------------|
| <b>1 - 11</b>    | <b>1232.7433</b> | <b>1231.7360</b> | <b>1231.6594</b> | <b>62</b>  | <b>1 - .MGLVTEEVRAK.A</b>               |
| <b>2 - 9</b>     | <b>902.6243</b>  | <b>901.6170</b>  | <b>901.4869</b>  | <b>144</b> | <b>0 M.GLVTEEVR.A</b>                   |
| <b>10 - 22</b>   | <b>1559.8088</b> | <b>1558.8015</b> | <b>1558.6756</b> | <b>81</b>  | <b>1 R.AKAEMYGDEICR.E Oxidation (M)</b> |
| <b>12 - 22</b>   | <b>1360.7076</b> | <b>1359.7003</b> | <b>1359.5435</b> | <b>115</b> | <b>0 K.AEMYGDEICR.E Oxidation (M)</b>   |
| <b>31 - 51</b>   | <b>2388.3455</b> | <b>2387.3382</b> | <b>2387.2042</b> | <b>56</b>  | <b>1 K.EISMPNGLLPLKDIEEVGYDR.E</b>      |
| <b>43 - 51</b>   | <b>1095.6352</b> | <b>1094.6279</b> | <b>1094.4880</b> | <b>128</b> | <b>0 K.DIEEVGYDR.E</b>                  |
| <b>43 - 59</b>   | <b>1994.1357</b> | <b>1993.1284</b> | <b>1992.9793</b> | <b>75</b>  | <b>1 K.DIEEVGYDRESGVVWLK.Q</b>          |
| <b>52 - 59</b>   | <b>917.5906</b>  | <b>916.5834</b>  | <b>916.5018</b>  | <b>89</b>  | <b>0 R.ESGVVWLK.Q</b>                   |
| <b>100 - 118</b> | <b>2288.2788</b> | <b>2287.2715</b> | <b>2287.1987</b> | <b>32</b>  | <b>0 K.ELLIWVTINEIYTEEPPTK.I</b>        |
| <b>123 - 129</b> | <b>775.5519</b>  | <b>774.5447</b>  | <b>774.4236</b>  | <b>156</b> | <b>0 K.TPTLSR.T</b>                     |
| <b>157 - 170</b> | <b>1433.8679</b> | <b>1432.8606</b> | <b>1432.7409</b> | <b>84</b>  | <b>1 K.SSEATEAKEVAIK.E</b>              |

Matched peptides information:

| Start - End      | Observed         | Mr(expt)         | Mr(calc)         | ppm        | Miss Sequence                           |
|------------------|------------------|------------------|------------------|------------|-----------------------------------------|
| <b>1 - 11</b>    | <b>1232.7433</b> | <b>1231.7360</b> | <b>1231.6594</b> | <b>62</b>  | <b>1 - .MGLVTEEVRAK.A</b>               |
| <b>2 - 9</b>     | <b>902.6243</b>  | <b>901.6170</b>  | <b>901.4869</b>  | <b>144</b> | <b>0 M.GLVTEEVR.A</b>                   |
| <b>10 - 22</b>   | <b>1559.8088</b> | <b>1558.8015</b> | <b>1558.6756</b> | <b>81</b>  | <b>1 R.AKAEMYGDEICR.E Oxidation (M)</b> |
| <b>12 - 22</b>   | <b>1360.7076</b> | <b>1359.7003</b> | <b>1359.5435</b> | <b>115</b> | <b>0 K.AEMYGDEICR.E Oxidation (M)</b>   |
| <b>31 - 51</b>   | <b>2388.3455</b> | <b>2387.3382</b> | <b>2387.2042</b> | <b>56</b>  | <b>1 K.EISMPNGLLPLKDIEEVGYDR.E</b>      |
| <b>43 - 51</b>   | <b>1095.6352</b> | <b>1094.6279</b> | <b>1094.4880</b> | <b>128</b> | <b>0 K.DIEEVGYDR.E</b>                  |
| <b>43 - 59</b>   | <b>1994.1357</b> | <b>1993.1284</b> | <b>1992.9793</b> | <b>75</b>  | <b>1 K.DIEEVGYDRESGVVWLK.Q</b>          |
| <b>52 - 59</b>   | <b>917.5906</b>  | <b>916.5834</b>  | <b>916.5018</b>  | <b>89</b>  | <b>0 R.ESGVVWLK.Q</b>                   |
| <b>100 - 118</b> | <b>2288.2788</b> | <b>2287.2715</b> | <b>2287.1987</b> | <b>32</b>  | <b>0 K.ELLIWVTINEIYTEEPPTK.I</b>        |
| <b>123 - 129</b> | <b>775.5519</b>  | <b>774.5447</b>  | <b>774.4236</b>  | <b>156</b> | <b>0 K.TPTLSR.T</b>                     |
| <b>157 - 170</b> | <b>1433.8679</b> | <b>1432.8606</b> | <b>1432.7409</b> | <b>84</b>  | <b>1 K.SSEATEAKEVAIK.E</b>              |

Spot No.: **191**

Mascot score: **81**

Sequence coverage %: **27**

NCBI accession No.: **gi| 312281797**

Matched peptides No.: **10**

Total peptides No.: **29**

Calculated Mr: **29391**

Calculated pI: **8.94**

### Annotated PMF spectra:

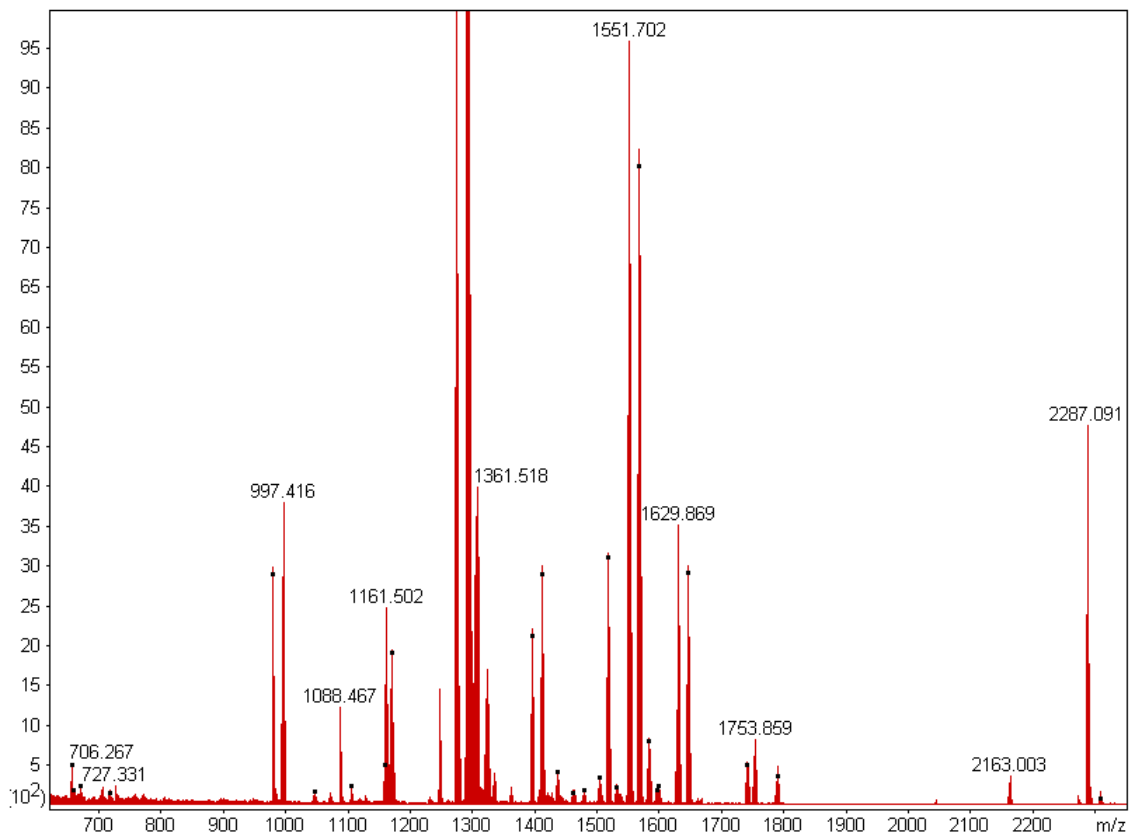

### Probability Based Mowse Score:

Protein score is  $-10 \cdot \log(P)$ , where P is the probability that the observed match is a random event. Protein scores greater than 72 are significant ( $p < 0.05$ ).

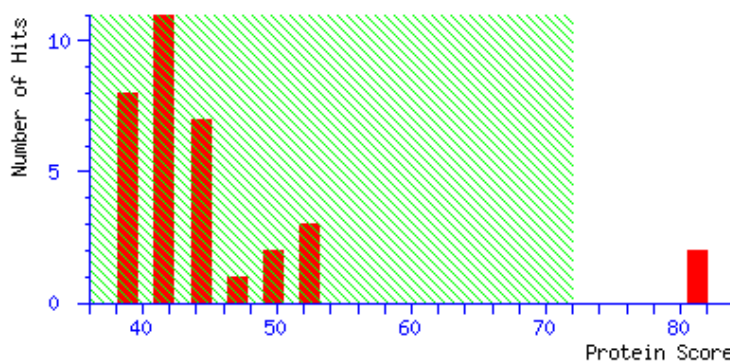

Matched peptide sequences: shown in **Bold Red**

```

1 MAAQALVSSS LTSSVQTARQ IFGTKPAVST SRRKSSFVVK ATSTPPVKQG
51 ANRPLWFASS QSLTYLDGSL PGDYGFDPGL LSDPEGTGGF IEPRWLAYGE
101 IINGRFAMLG AAGAIAP EIL GKAGLIPAET ALPWFQTGVI PPAGTYSYWA
151 DNYTLFVLEM ALMGFAEHRR LQDWYNPGSM GKQYFLGLEK GFSGSGEPAY
201 PGGPFFNPLG FGKNEKSMKE LKLKEIKNGR LAMLAILGYF VQGLVTGVGP
251 YQNLLDHLAD FVNNNVLTSL KFH

```

Matched peptides information:

| Start - End | Observed  | Mr (expt) | Mr (calc) | ppm  | Miss | Sequence                             |
|-------------|-----------|-----------|-----------|------|------|--------------------------------------|
| 95 - 105    | 1291.5727 | 1290.5654 | 1290.6720 | -83  | 0    | R.WLAYGEIINGR.F                      |
| 106 - 122   | 1629.8690 | 1628.8617 | 1628.8960 | -21  | 0    | R.FAMLGAAGAIAP EILGK.A               |
| 106 - 122   | 1645.8903 | 1644.8830 | 1644.8909 | -5   | 0    | R.FAMLGAAGAIAP EILGK.A Oxidation (M) |
| 170 - 182   | 1551.7019 | 1550.6946 | 1550.7300 | -23  | 1    | R.RLQDWYNPGSMGK.Q                    |
| 170 - 182   | 1567.7170 | 1566.7097 | 1566.7249 | -10  | 1    | R.RLQDWYNPGSMGK.Q Oxidation (M)      |
| 171 - 182   | 1395.5834 | 1394.5761 | 1394.6289 | -38  | 0    | R.LQDWYNPGSMGK.Q                     |
| 171 - 182   | 1411.5901 | 1410.5828 | 1410.6238 | -29  | 0    | R.LQDWYNPGSMGK.Q Oxidation (M)       |
| 183 - 190   | 997.4163  | 996.4091  | 996.5280  | -119 | 0    | K.QYFLGLEK.G                         |
| 191 - 213   | 2287.0913 | 2286.0840 | 2286.0746 | 4    | 0    | K.GFSGSGEPAYPGGPFFNPLGFGK.N          |
| 191 - 216   | 2658.2530 | 2657.2457 | 2657.2551 | -4   | 1    | K.GFSGSGEPAYPGGPFFNPLGFGKNEK.S       |

Spot No.: **192**

Mascot score: **94**

Sequence coverage %: **35**

NCBI accession No.: **gi| 312282625**

Matched peptides No.: **8**

Total peptides No.: **16**

Calculated Mr: **28229**

Calculated pI: **6.84**

### Annotated PMF spectra:

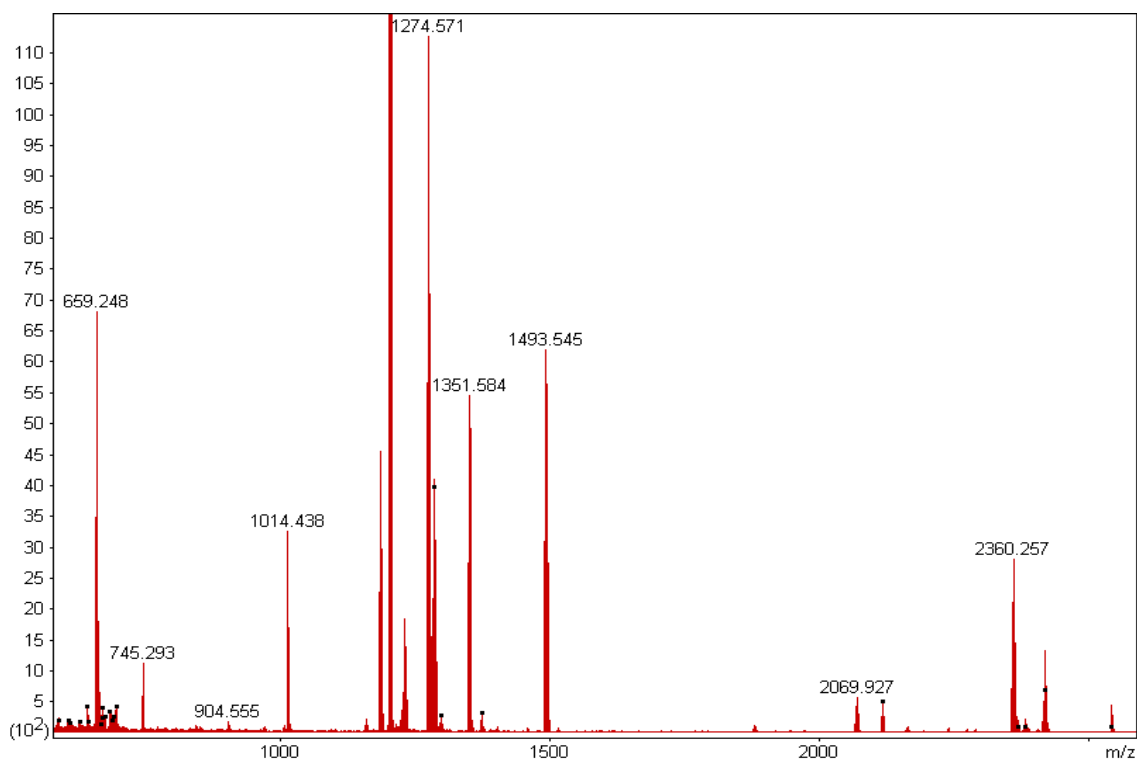

### Probability Based Mowse Score:

Protein score is  $-10 \cdot \log(P)$ , where P is the probability that the observed match is a random event. Protein scores greater than 72 are significant ( $p < 0.05$ ).

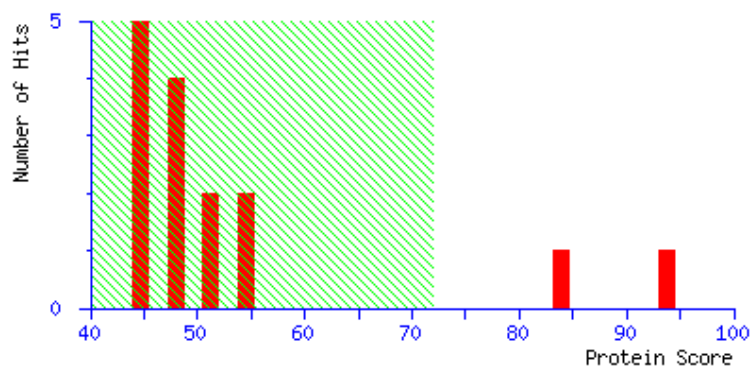



Matched peptide sequences: shown in **Bold Red**

```

1 MAYSACFLHQ SALASSAARS SSSSSSQRYV SLSKPVQIVC KAQQPHEDDN
51 SAVSRRLALT LLVGAAAVGS KVSPADAAYG EAANVFGKPK ANTDFTAYSG
101 DGFKVQVPAK WNPSREIEYP GQVLRVEDNF DATSNLNMV TPTDKKSITD
151 YGSPEEFLSQ VNYLLGKQAY FGETASEGGF DANAVATANI LETNVQEVGG
201 KPYYYLSVLT RTADGDEGGK HQLITATVNG GKLYICKAQA GDKRWFKGAN
251 KFVEKAATSF SVA

```

Matched peptides information:

| Start - End | Observed  | Mr (expt) | Mr (calc) | ppm  | Miss | Sequence                  |               |
|-------------|-----------|-----------|-----------|------|------|---------------------------|---------------|
| 91 - 104    | 1493.5451 | 1492.5378 | 1492.6470 | -73  | 0    | K.ANTDFTAYSGDGFK.V        |               |
| 111 - 115   | 659.2482  | 658.2409  | 658.3187  | -118 | 0    | K.WNPSR.E                 |               |
| 116 - 125   | 1203.5416 | 1202.5343 | 1202.6295 | -79  | 0    | R.EIEYPGQVLR.Y            |               |
| 126 - 146   | 2418.3031 | 2417.2958 | 2417.1057 | 79   | 1    | R.YEDNFDATSNLNMVMTPTDKK.S | Oxidation (M) |
| 147 - 167   | 2360.2571 | 2359.2498 | 2359.1583 | 39   | 0    | K.SITDYGSPEEFLSQVNYLLGK.Q |               |
| 202 - 211   | 1274.5708 | 1273.5635 | 1273.6707 | -84  | 0    | K.PYYYLSVLR.T             |               |
| 233 - 237   | 696.2585  | 695.2512  | 695.3676  | -167 | 0    | K.LYICK.A                 |               |
| 238 - 244   | 745.2925  | 744.2853  | 744.3878  | -138 | 1    | K.AQAGDKR.W               |               |

Spot No.: **193**

Mascot score: **81** Sequence coverage %: **37**

NCBI accession No.: **gi| 312282463**

Matched peptides No.: **10**

Total peptides No.: **37**

Calculated Mr: **30515**

Calculated pI: **7.63**

### Annotated PMF spectra:

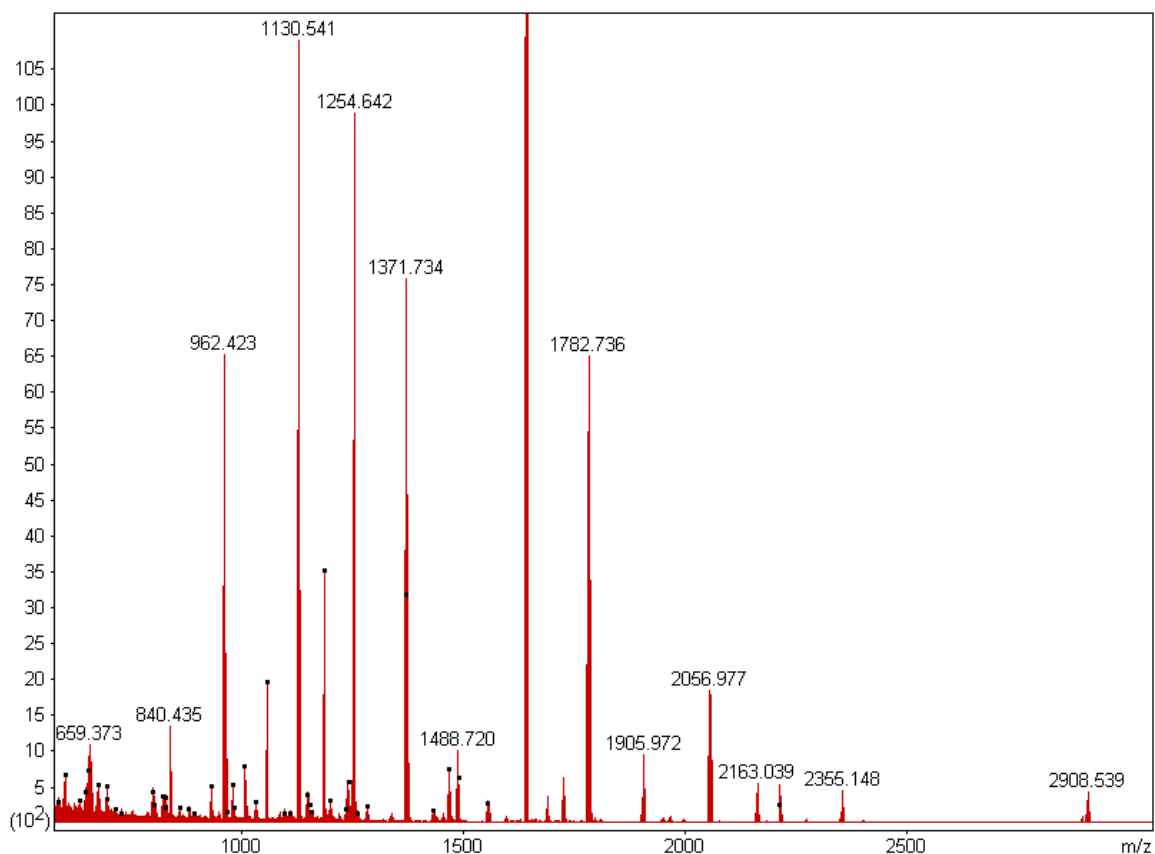

### Probability Based Mowse Score:

Protein score is  $-10 \cdot \log(P)$ , where P is the probability that the observed match is a random event. Protein scores greater than 72 are significant ( $p < 0.05$ ).

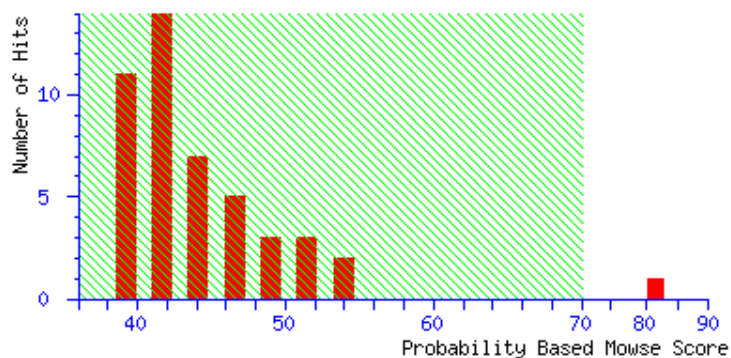

Matched peptide sequences: shown in **Bold Red**

**1** MATSSTFSSL LPSPPALLSD HRSPPPSIRY SFSPLTTPKS SRLGFTVPEK  
**51** RNLAANSSLV EVSIGGESDP PPSSSGSGGD DKQIALLLK **LLSVVSGLNR**  
**101** GLVASVDDLE RAEVAAKELE **TAGGPVDLTD DLDKLQGW** **LLYSSAFSSR**  
**151** **SLGGSRPGLP TGRLIPVTLG QVFQR**IDVFS KDFDNIAEVE LGAPWPFPPPL  
**201** EATATLAHKF **ELLGTCKIKI TFEKTTVKTS GMLSQIPPF** **IPRLPDSFRP**  
**251** SSNPGTGDFE VTYVDDTMRI TR**GDRGELRV** FVIA

Matched peptides information:

| Start - End | Observed  | Mr(expt)  | Mr(calc)  | ppm | Miss | Sequence                 |
|-------------|-----------|-----------|-----------|-----|------|--------------------------|
| 91 - 100    | 1057.5970 | 1056.5897 | 1056.6291 | -37 | 0    | K.LLSVVSGLNR.G           |
| 118 - 138   | 2214.1251 | 2213.1178 | 2213.1063 | 5   | 1    | K.ELETAGGPVDLTDLDKLQGW.W |
| 141 - 150   | 1130.5413 | 1129.5340 | 1129.5768 | -38 | 0    | R.LLYSSAFSSR.S           |
| 151 - 163   | 1254.6418 | 1253.6345 | 1253.6840 | -39 | 0    | R.SLGGSRPGLPTGR.L        |
| 164 - 175   | 1370.7345 | 1369.7272 | 1369.8082 | -59 | 0    | R.LIPVTLGQVFQR.I         |
| 210 - 217   | 967.4446  | 966.4374  | 966.4845  | -49 | 0    | K.FELGTCK.I              |
| 229 - 243   | 1641.7879 | 1640.7806 | 1640.8522 | -44 | 0    | K.TSGMLSQIPPFIPR.L       |
| 273 - 279   | 802.3879  | 801.3806  | 801.4093  | -36 | 1    | R.GDRGELR.V              |

Spot No.: **194**

Mascot score: **81**    Sequence coverage %: **29**

NCBI accession No.: **gi| 148515008**

Matched peptides No.: **6**

Total peptides No.: **13**

Calculated Mr: **25544**

Calculated pI: **8.77**

### Annotated PMF spectra:

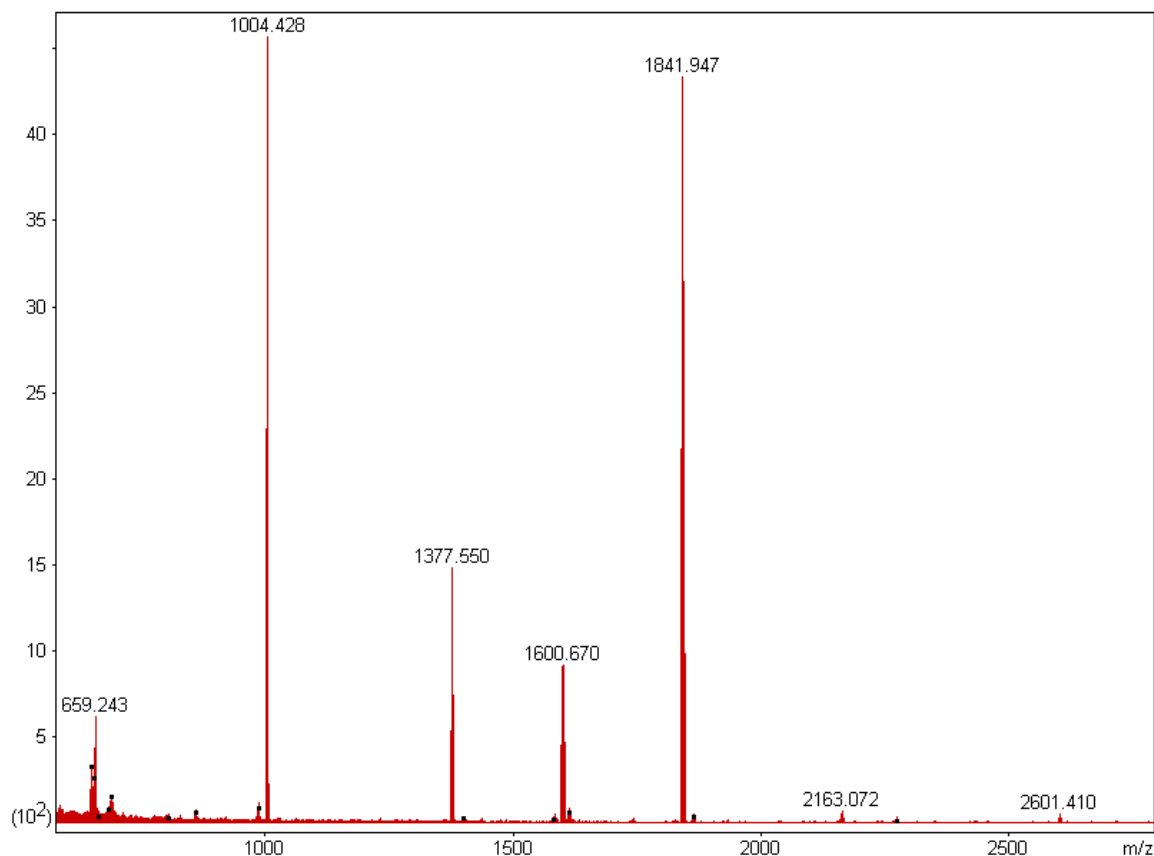

### Probability Based Mowse Score:

Protein score is  $-10 \cdot \log(P)$ , where P is the probability that the observed match is a random event. Protein scores greater than 72 are significant ( $p < 0.05$ ).

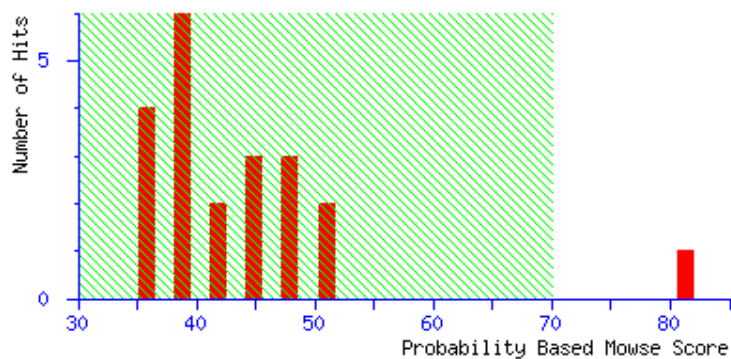

Matched peptide sequences: shown in **Bold Red**

```
1 MAIRSVATRK TLAGLKETSS RLLGFRGIQT FTLPLDPYDY SALEPAISGE
51 IMQLHHQKHH QTYVTNYNNA LEQLDQAVNK GDASTVVKLQ SAIKFNGGGH
101 VNHSIFWKNL APVNQGGGEP PKGALGG AID THEGSLEGLV KKMNAEGAAL
151 QGSGWVWLGL DKELKKLVVD TTANQDPLVT KGASLVPLVG IDVWEHAYYL
201 QYKNVRPDYL KNVWKVINWK YASEVYEKEC K
```

Matched peptides information:

| Start - End | Observed  | Mr(expt)  | Mr(calc)  | ppm  | Miss | Sequence                 |
|-------------|-----------|-----------|-----------|------|------|--------------------------|
| 109 - 122   | 1377.5495 | 1376.5422 | 1376.7048 | -118 | 0    | K.NLAPVNQGGGEPK.G        |
| 123 - 141   | 1841.9469 | 1840.9396 | 1840.9683 | -16  | 0    | K.GALGG AIDTHEGSLEGLVK.K |
| 167 - 181   | 1613.7422 | 1612.7349 | 1612.8672 | -82  | 0    | K.LVVDTTANQDPLVTK.G      |
| 204 - 211   | 1004.4276 | 1003.4203 | 1003.5451 | -124 | 0    | K.NVRPDYLK.N             |
| 216 - 220   | 659.2430  | 658.2357  | 658.3802  | -219 | 0    | K.VINWK.Y                |
| 221 - 228   | 988.3469  | 987.3396  | 987.4549  | -117 | 0    | K.YASEVYEK.E             |

Spot No.: **195**

Mascot score: **98**

Sequence coverage %: **50**

NCBI accession No.: **gi| 1405561**

Matched peptides No.: **11**

Total peptides No.: **57**

Calculated Mr: **24147**

Calculated pI: **9.23**

### Annotated PMF spectra:

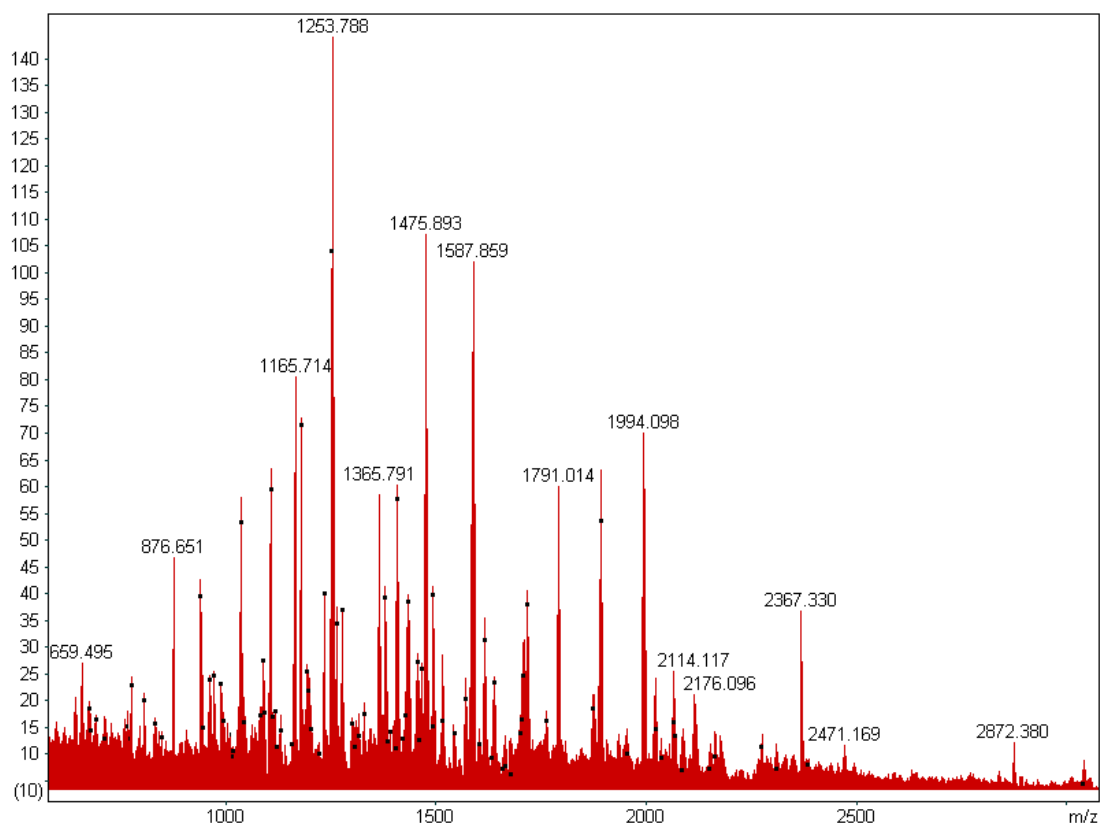

### Probability Based Mowse Score:

Protein score is  $-10 \cdot \log(P)$ , where P is the probability that the observed match is a random event. Protein scores greater than 72 are significant ( $p < 0.05$ ).

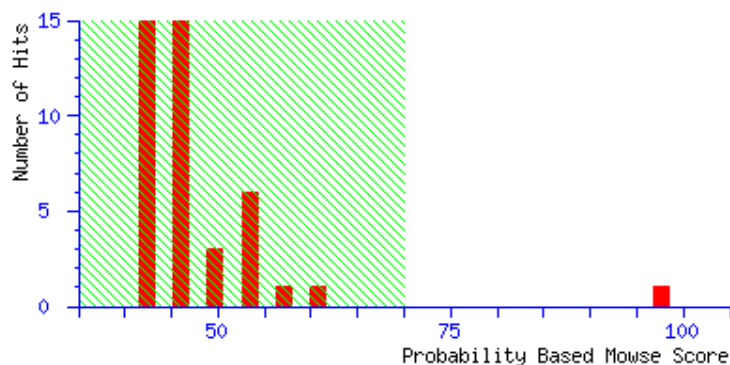

Matched peptide sequences: shown in **Bold Red**

**1** MARRADEEYD YLFK**VVLIGD** **SGVGKSNLLS** **RFTRNEFCLE** SKSTIGVEFA  
**51** TR**TLQVEGRT** **VKAQIWDTAG** QERY**YRAITSA** **YYRGAVGALL** VYDVTKPTTF  
**101** EQVWLKELRD HADSNIVIML IGNKTDLKHS **RAVRTEDAQG** **FMLRKKALSF**  
**151** **IETSALKATH** **VEKAFQTILC** LRFTGIISKK **SLSSDEPAPS** **VIKEAVKHIV**  
**201** **VGGSEANTKK** PCCSN

Matched peptides information:

| Start - End | Observed  | Mr(expt)  | Mr(calc)  | ppm | Miss | Sequence             |
|-------------|-----------|-----------|-----------|-----|------|----------------------|
| 15 - 25     | 1043.6818 | 1042.6745 | 1042.6023 | 69  | 0    | K.VVLIGDSGVGK.S      |
| 26 - 34     | 1093.6895 | 1092.6822 | 1092.6040 | 72  | 1    | K.SNLLSRFTR.N        |
| 53 - 62     | 1130.7152 | 1129.7079 | 1129.6455 | 55  | 1    | R.TLQVEGRTVK.A       |
| 74 - 83     | 1263.7999 | 1262.7926 | 1262.6407 | 120 | 1    | R.YRAITSAYYR.G       |
| 76 - 83     | 944.6407  | 943.6334  | 943.4763  | 167 | 0    | R.AITSAYYR.G         |
| 132 - 144   | 1493.8865 | 1492.8792 | 1492.7456 | 89  | 1    | R.AVRTEDAQGFMLR.K    |
| 146 - 157   | 1307.8139 | 1306.8066 | 1306.7496 | 44  | 1    | K.KALSFETSALK.A      |
| 147 - 157   | 1179.7340 | 1178.7267 | 1178.6547 | 61  | 0    | K.ALSFIETSALK.A      |
| 158 - 172   | 1763.9593 | 1762.9520 | 1762.9400 | 7   | 1    | K.ATNVEKAFQTILCLR.F  |
| 181 - 193   | 1329.8098 | 1328.8025 | 1328.6823 | 90  | 0    | K.SLSSDEPAPSVIK.E    |
| 194 - 209   | 1638.9738 | 1637.9665 | 1637.8737 | 57  | 1    | K.EAVKHIVVGGSEANTK.K |

Spot No.: **196**

Mascot score: **89** Sequence coverage %: **39**

NCBI accession No.: **gi| 148515008**

Matched peptides No.: **7**

Total peptides No.: **12**

Calculated Mr: **25544**

Calculated pI: **8.77**

### Annotated PMF spectra:

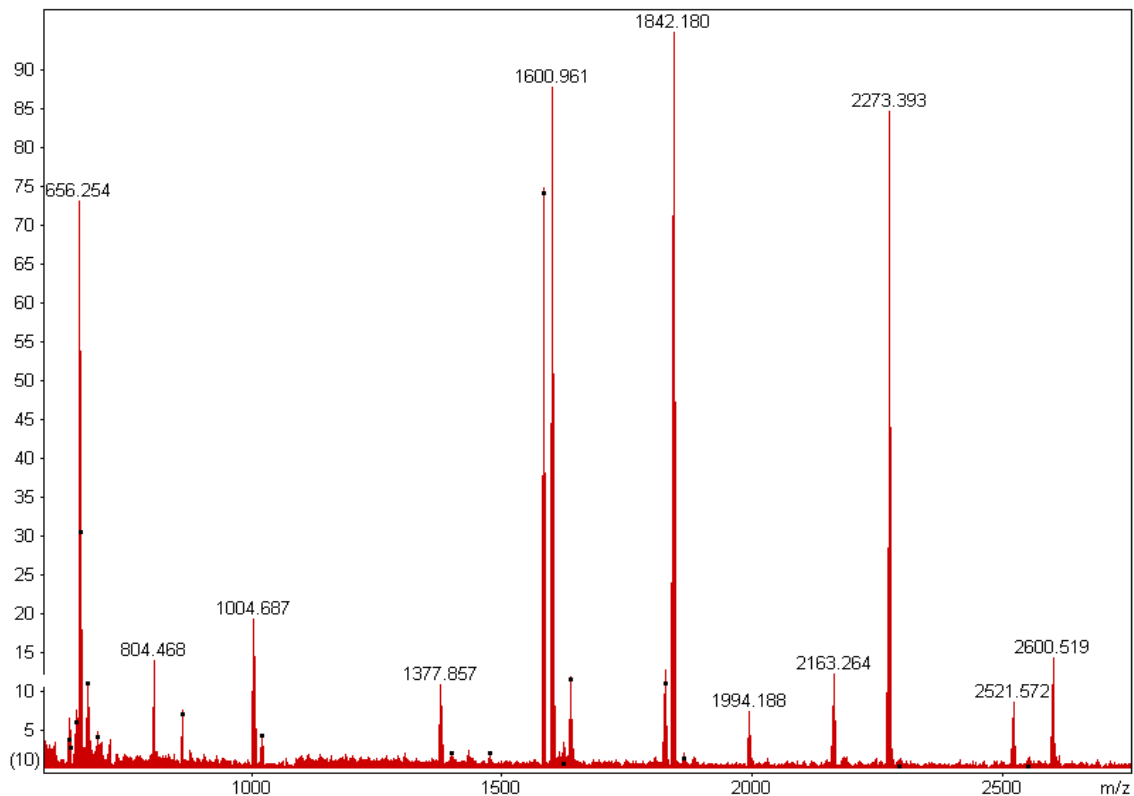

### Probability Based Mowse Score:

Protein score is  $-10 \cdot \log(P)$ , where P is the probability that the observed match is a random event. Protein scores greater than 72 are significant ( $p < 0.05$ ).

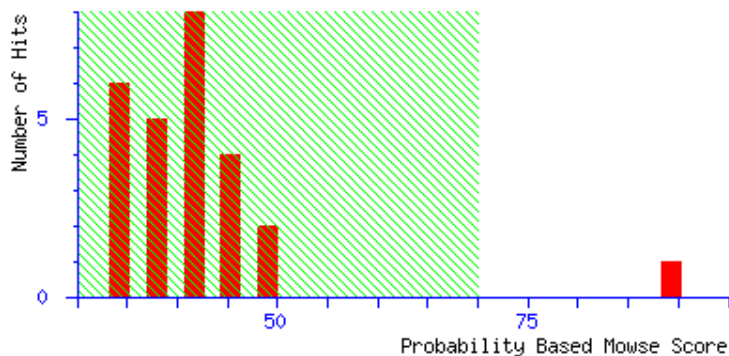



Matched peptide sequences: shown in **Bold Red**

1 **MAIRSVATR**K TLAGLKETSS RLLGFRGIQT FTLPLDPYDY SALEPAISGE  
51 **IMQLHHQKHH QTYVTNYNNA LEQLDQAVNK** GDASTVVVKLQ **SAIK**FNNGGGH  
101 **VNHSIFWKNL APVNQGGGEP PKGALGGAI**D **THFGSLEGLV** **KKMNAEGAAL**  
151 **QSGGWVWLGL DKELKKLVVD TTANQDPLVT KGASLVPLVG** **IDVWEHAYYL**  
201 **QYK**NVRPDYL **KNVWKVINWK YASEVYEKEC** K

Matched peptides information:

| Start - End | Observed  | Mr(expt)  | Mr(calc)  | ppm | Miss | Sequence                                  |
|-------------|-----------|-----------|-----------|-----|------|-------------------------------------------|
| 1 - 9       | 1004.6874 | 1003.6801 | 1003.5597 | 120 | 1    | -. <b>MAIRSVATR</b> .K                    |
| 1 - 9       | 1020.6133 | 1019.6060 | 1019.5546 | 50  | 1    | -. <b>MAIRSVATR</b> .K Oxidation (M)      |
| 59 - 80     | 2600.5194 | 2599.5121 | 2599.2415 | 104 | 0    | K. <b>HHQTYVTNYNNALEQLDQAVNK</b> .G       |
| 89 - 94     | 659.4775  | 658.4703  | 658.4014  | 105 | 0    | K. <b>LQSAIK</b> .F                       |
| 109 - 122   | 1377.8566 | 1376.8493 | 1376.7048 | 105 | 0    | K. <b>NLAPVNQGGGEPK</b> .G                |
| 123 - 141   | 1842.1803 | 1841.1730 | 1840.9683 | 111 | 0    | K. <b>GALGGAI</b> D <b>THFGSLEGLV</b> K.K |
| 182 - 203   | 2521.5723 | 2520.5650 | 2520.3053 | 103 | 0    | K. <b>GASLVPLVGIDVWEHAYYLQYK</b> .H       |

Spot No.: **197**

Mascot score: **88** Sequence coverage %: **42**

NCBI accession No.: **gi| 2792230**

Matched peptides No.: **8**

Total peptides No.: **38**

Calculated Mr: **19967**

Calculated pI: **7.00**

### Annotated PMF spectra:

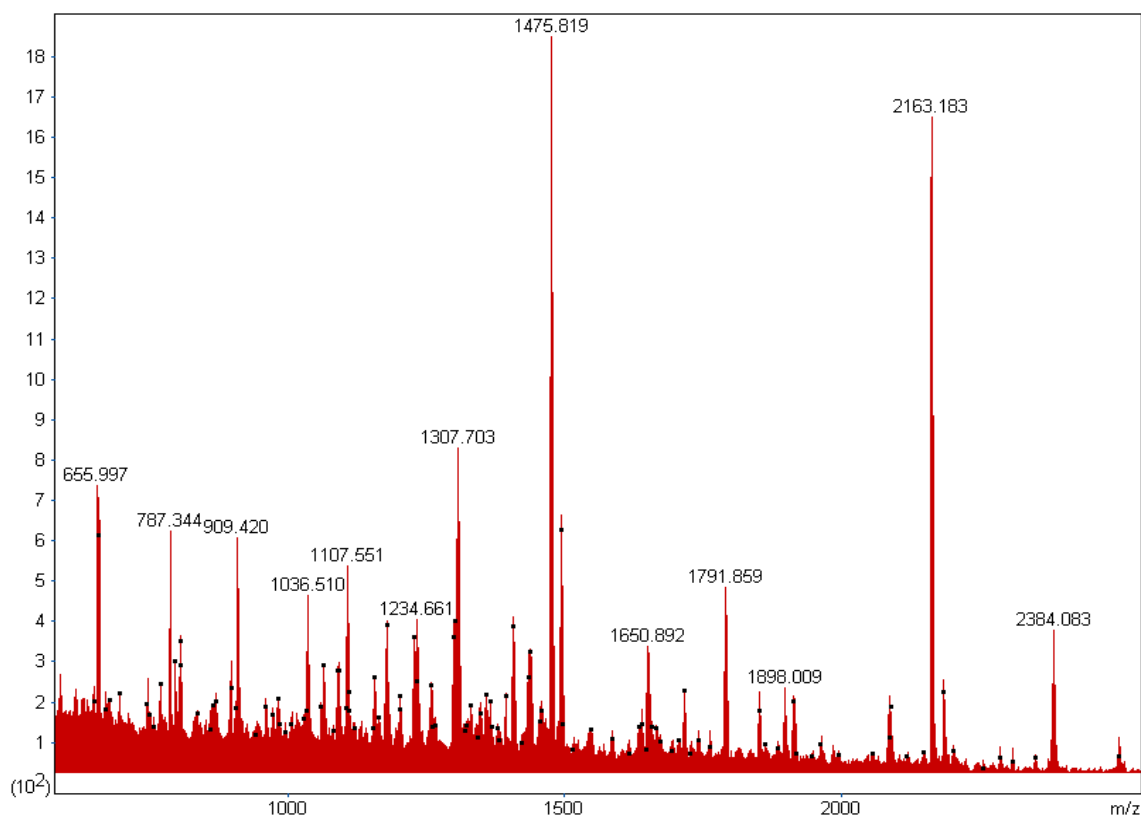

### Probability Based Mowse Score:

Protein score is  $-10 \cdot \log(P)$ , where P is the probability that the observed match is a random event. Protein scores greater than 72 are significant ( $p < 0.05$ ).

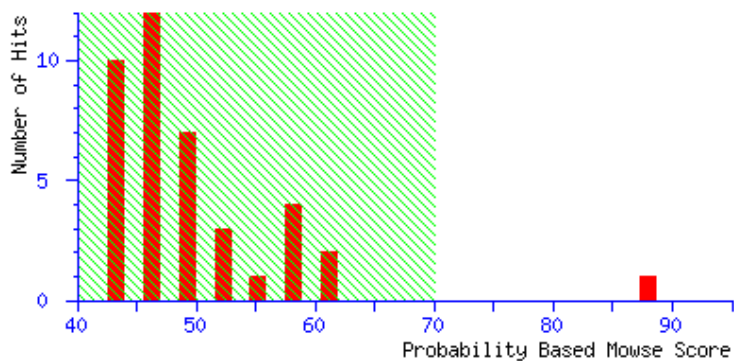

Matched peptide sequences: shown in **Bold Red**

1 **GGWGKTTLAA NVYRNEREK**F ECHAWVSISQ TYSIKDVLK**C LSLELDLKKE**  
51 IQGNIGDMDS ATLQNELYK**F LMDQKYLIVL** DDVWVPETVN DLFSIFVSNL  
101 KGSRLVTTR **IDGVAHLAFP DKRITLEPLS** **EKKSWELFCK** TAFPRDKNHE  
151 RPTK**LTVLAQ QIVSKCEGFP LAL**

Matched peptides information:

| Start - End | Observed  | Mr(expt)  | Mr(calc)  | ppm  | Miss Sequence              |
|-------------|-----------|-----------|-----------|------|----------------------------|
| 1 - 14      | 1493.7956 | 1492.7883 | 1492.7787 | 6    | 1 -.GGWGKTTLAANVYR.N       |
| 6 - 17      | 1407.7434 | 1406.7361 | 1406.7266 | 7    | 1 K.TTLAANVYRNER.E         |
| 40 - 48     | 1090.5271 | 1089.5198 | 1089.5740 | -50  | 0 K.CLSLELDLK.K            |
| 70 - 75     | 797.2867  | 796.2794  | 796.3789  | -125 | 0 K.FLMDQK.Y Oxidation (M) |
| 111 - 123   | 1438.7456 | 1437.7383 | 1437.7728 | -24  | 1 R.IDGVAHLAFDPKR.I        |
| 124 - 133   | 1157.5816 | 1156.5743 | 1156.6703 | -83  | 1 R.ITLEPLSEKK.S           |
| 155 - 173   | 2087.0935 | 2086.0862 | 2086.1496 | -30  | 1 K.LTVLAQQIVSKCEGFP.L.-   |
| 166 - 173   | 906.3922  | 905.3849  | 905.4317  | -52  | 0 K.CEGFP.L.-              |

Spot No.: **198**

Mascot score: **82** Sequence coverage %: **15**

NCBI accession No.: **gi| 21592994**

Matched peptides No.: **8**

Total peptides No.: **15**

Calculated Mr: **34061**

Calculated pI: **9.04**

### Annotated PMF spectra:

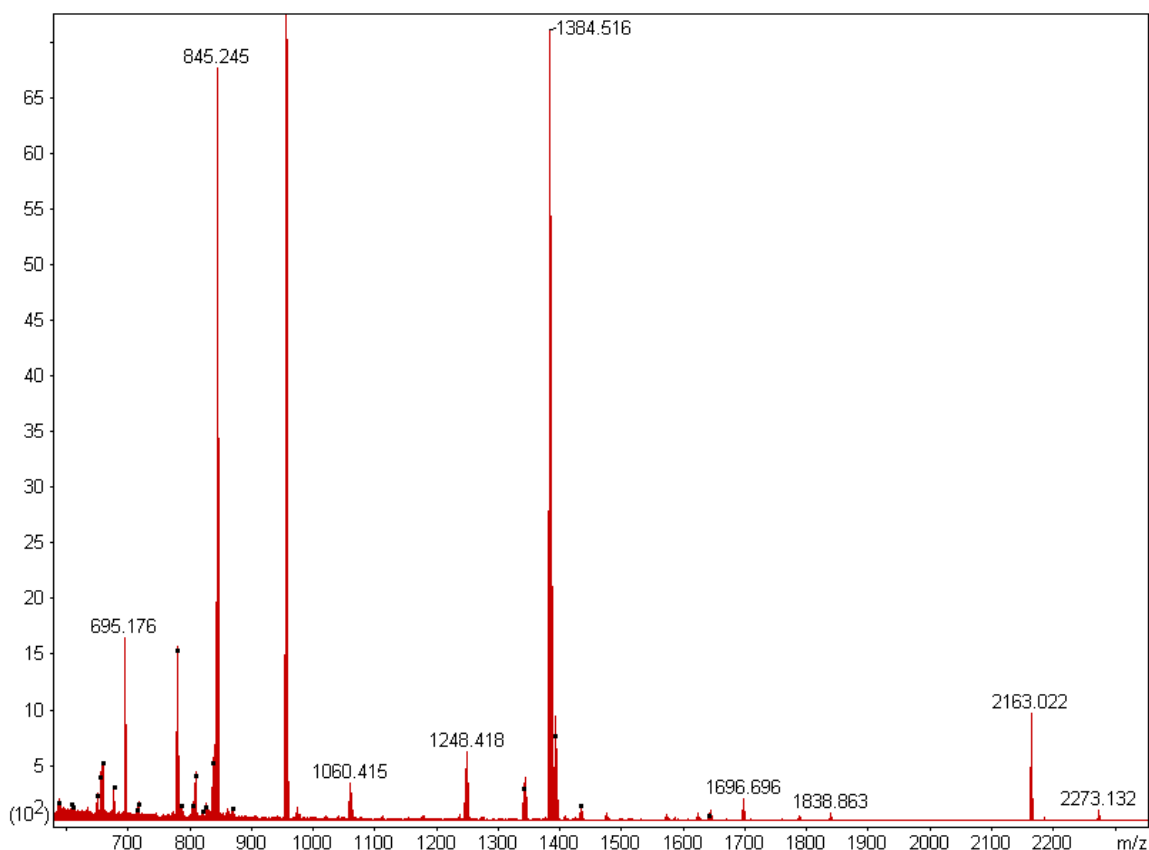

### Probability Based Mowse Score:

Protein score is  $-10 \cdot \log(P)$ , where P is the probability that the observed match is a random event. Protein scores greater than 72 are significant ( $p < 0.05$ ).

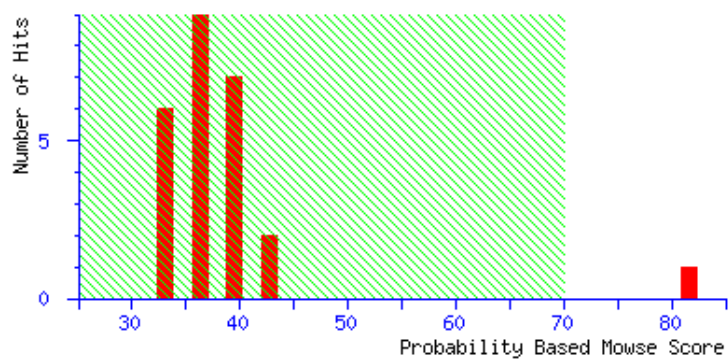

Matched peptide sequences: shown in **Bold Red**

```

1 MAATAISSLS FPALGQSDKI SNFASSRPLA SAIRICTKFS RLSLNSRSTS
51 KSLIHCMNSV TADVPPVSET KSKFLKAYKR PIPSIYNTVL QELIVQQHLM
101 RYKKTIRYDP VFALGFVTYV DQLMEGYPSD QDRDAIFKAY IEALNEDPKQ
151 YRIDAQKMEE WARSQTSASL VDFSSKEGDI EAVLKDIAGR AGSKEGFSYS
201 RFFAVGLFRL LELASATDPT VLDKLCASLN INKKSVDRL DVYRNLLSKL
251 VQANELLKEY VEREKKKQEE RAQSQKANET ISKCLGDTLY NPSFLVERKS
301

```

Matched peptides information:

| Start - End | Observed  | Mr(expt)  | Mr(calc)  | ppm  | Miss | Sequence                             |
|-------------|-----------|-----------|-----------|------|------|--------------------------------------|
| 153 - 163   | 1392.5012 | 1391.4939 | 1391.6503 | -112 | 1    | <b>R.IDAQKMEEWAR.S</b> Oxidation (M) |
| 158 - 163   | 821.1717  | 820.1645  | 820.3537  | -231 | 0    | <b>K.MEEWAR.S</b>                    |
| 158 - 163   | 837.1740  | 836.1667  | 836.3487  | -218 | 0    | <b>K.MEEWAR.S</b> Oxidation (M)      |
| 177 - 185   | 973.3390  | 972.3317  | 972.5128  | -186 | 0    | <b>K.EGDIEAVLK.D</b>                 |
| 195 - 201   | 845.2452  | 844.2379  | 844.3715  | -158 | 0    | <b>K.EGFSYSR.F</b>                   |
| 202 - 209   | 956.3825  | 955.3752  | 955.5280  | -160 | 0    | <b>R.FFAVGLFR.L</b>                  |
| 239 - 244   | 780.2322  | 779.2249  | 779.3814  | -201 | 0    | <b>R.DLDVYR.N</b>                    |
| 259 - 263   | 695.1755  | 694.1682  | 694.3286  | -231 | 0    | <b>K.EYVER.E</b>                     |

Spot No.: **199**

Mascot score: **116** Sequence coverage %: **49**

NCBI accession No.: **gi| 21593565**

Matched peptides No.: **16**

Total peptides No.: **62**

Calculated Mr: **35982**

Calculated pI: **7.00**

### Annotated PMF spectra:

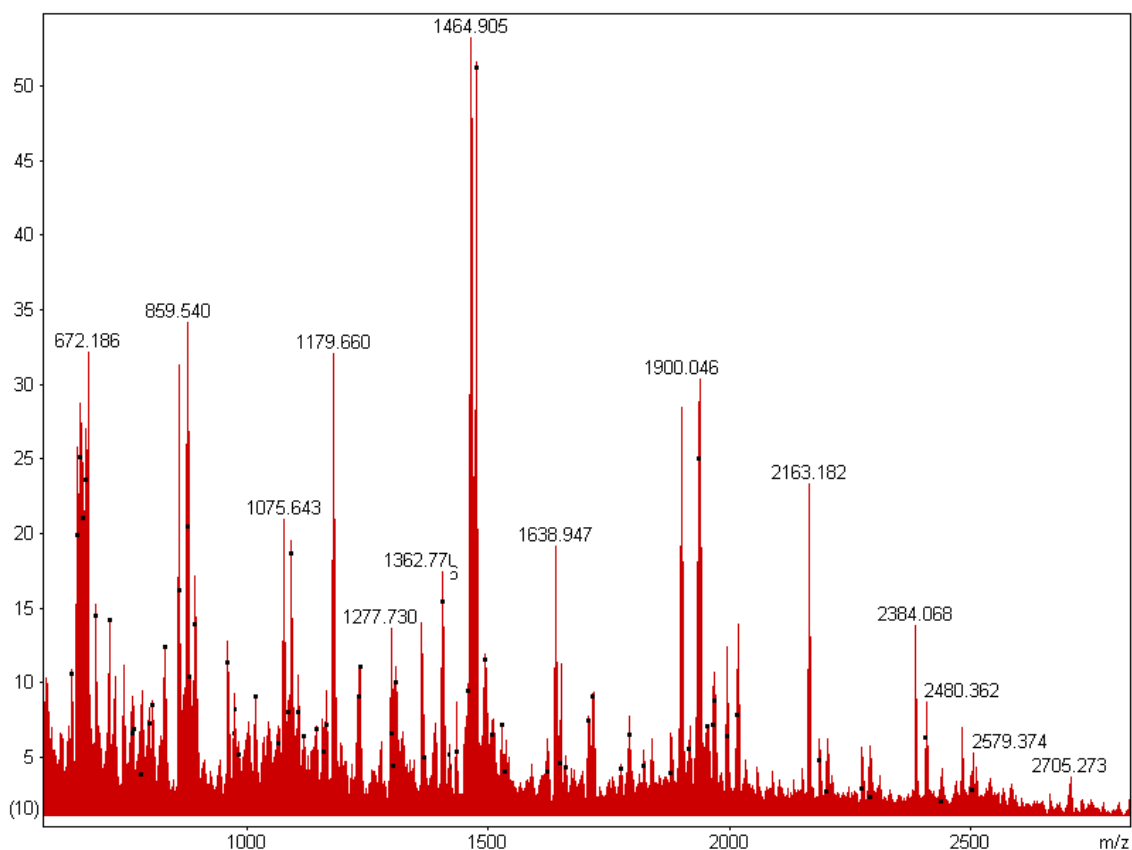

### Probability Based Mowse Score:

Protein score is  $-10 \cdot \log(P)$ , where P is the probability that the observed match is a random event. Protein scores greater than 72 are significant ( $p < 0.05$ ).

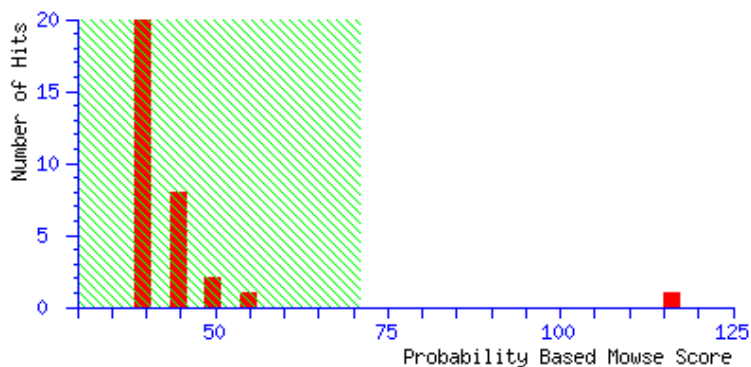

Matched peptide sequences: shown in **Bold Red**

**1** **MAKKPVR**LVLTGAAGQIGYALVPMIARG LGADQPVLH MLDIPFAAEA  
**51** **LNGVKMELVD** AAFPLLKGVV ATTDAVEACT GVNVAVMVGG FPRKEGMERK  
**101** **DVMSKRVSIY** **KSQASALEKH** AAPNCKVLV ANPANTNALI LKEFAPSIPE  
**151** **KNITCLTRLD** HNRALGQVSE RLSVPVSDVK NVIIWGNHSS TQYPDVNHAT  
**201** **VKTSSGKPV** RELVKNDEWL NGEFISTVQQ RGAAIKARK **LSSALSAASS**  
**251** **ACDHIRDWV** GTPEGTFSM GVYSDGSYNV PAGLIYSFPV TCRNGEWTIV  
**301** **QGLPIDDASR** **KKMDLTAEEL** **KEEKDLAYSC** LS

Matched peptides information:

| Start - End | Observed  | Mr (expt) | Mr (calc) | ppm  | Miss Sequence                            |
|-------------|-----------|-----------|-----------|------|------------------------------------------|
| 1 - 7       | 829.3607  | 828.3534  | 828.5004  | -177 | 1 -.MAKKPVR.V                            |
| 4 - 27      | 2480.3617 | 2479.3544 | 2479.4461 | -37  | 1 K.KPVRVLVTGAAGQIGYALVPMIAR.G           |
| 8 - 27      | 2016.2217 | 2015.2144 | 2015.1238 | 45   | 0 R.VLVTGAAGQIGYALVPMIAR.G Oxidation (M) |
| 56 - 67     | 1362.7761 | 1361.7688 | 1361.7265 | 31   | 0 K.MELVDAAPLLK.G Oxidation (M)          |
| 68 - 94     | 2705.2730 | 2704.2657 | 2704.3677 | -38  | 1 K.GVVATTDAVEACTGVNVAVMVGGFPRK.E        |
| 95 - 99     | 637.4127  | 636.4055  | 636.2537  | 239  | 0 K.EGMRK.K Oxidation (M)                |
| 95 - 100    | 765.4579  | 764.4507  | 764.3487  | 133  | 1 K.EGMERK.D Oxidation (M)               |
| 101 - 111   | 1299.6981 | 1298.6908 | 1298.6540 | 28   | 1 K.DVMSKRVSIYK.S Oxidation (M)          |
| 120 - 126   | 797.4788  | 796.4716  | 796.3650  | 134  | 0 K.HAAPNCK.V                            |
| 127 - 142   | 1650.0463 | 1649.0390 | 1648.9876 | 31   | 0 K.VLVVANPANTNALILK.E                   |
| 143 - 151   | 1017.5791 | 1016.5718 | 1016.5178 | 53   | 0 K.EFAPSIPEK.N                          |
| 152 - 158   | 877.2666  | 876.2593  | 876.4487  | -216 | 0 K.NITCLTR.L                            |
| 164 - 171   | 859.5397  | 858.5324  | 858.4559  | 89   | 0 R.ALGQVSER.L                           |
| 203 - 211   | 960.5618  | 959.5546  | 959.5036  | 53   | 0 K.TSSGKPV.R.E                          |
| 240 - 256   | 1773.9535 | 1772.9462 | 1772.8839 | 35   | 1 R.KLSSALSAASSACDHIR.D                  |
| 313 - 321   | 1065.5541 | 1064.5468 | 1064.5060 | 38   | 0 K.MDLTAEELK.E Oxidation (M)            |

Spot No.: **200**

Mascot score: **85**    Sequence coverage %: **20**

NCBI accession No.: **gi| 167891400**

Matched peptides No.: **6**

Total peptides No.: **13**

Calculated Mr: **26275**

Calculated pI: **7.01**

### Annotated PMF spectra:

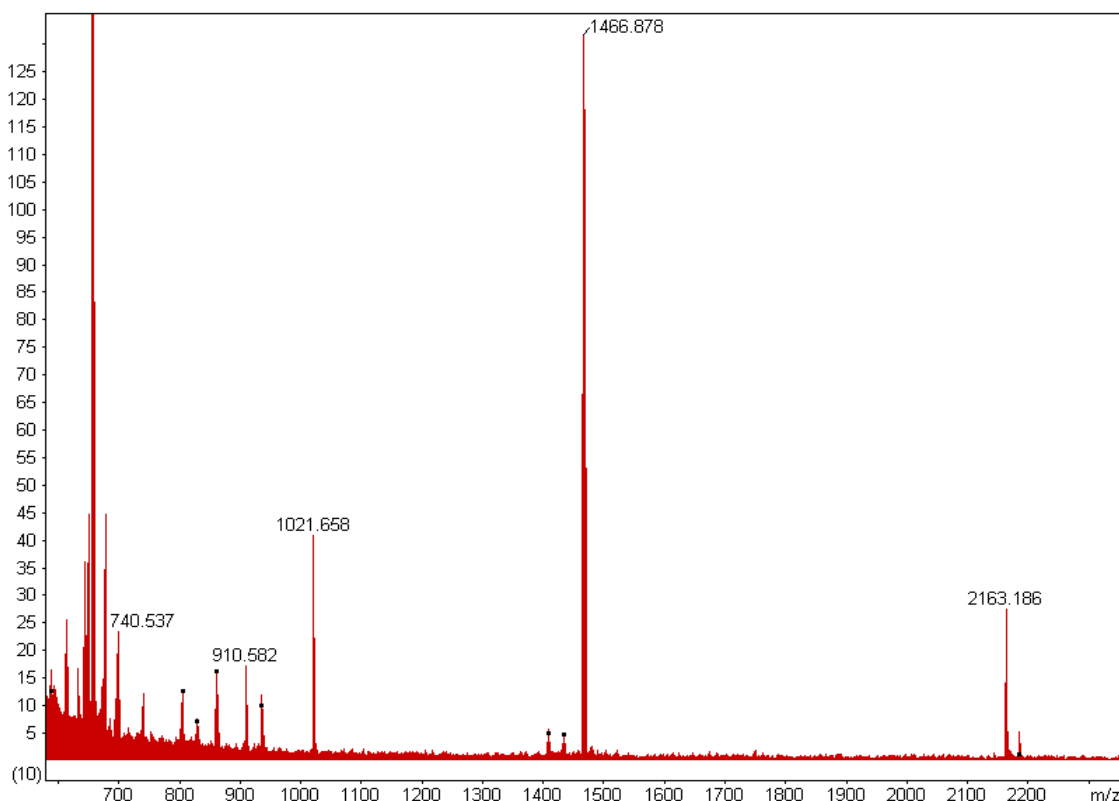

### Probability Based Mowse Score:

Protein score is  $-10 \cdot \log(P)$ , where P is the probability that the observed match is a random event. Protein scores greater than 72 are significant ( $p < 0.05$ ).

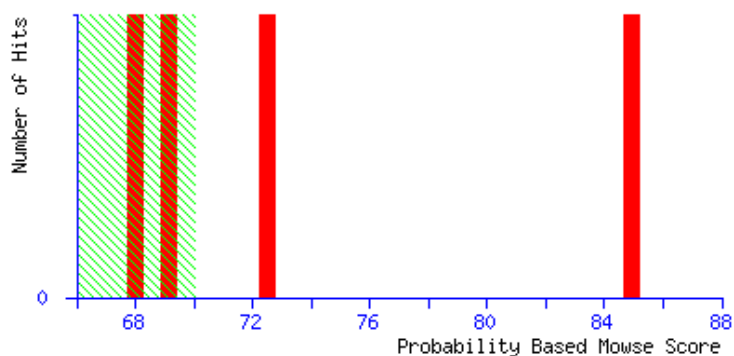



Matched peptide sequences: shown in **Bold Red**

**1** K**ASAGFKAGV** K**DYKLTYYTP** **EYETKDTDIL** **AAFRVTPQPG** VPPEEAGAAV  
**51** AAESSTGTWT TVWTDGLTSL DRYKGR**CYHI** ETVVGEENQY IAYVAYPLDL  
**101** FEEG**SVTNMF** TSIVGNVFGF **KALRALRLED** LRIPPSYSKT FQGPPHGIQV  
**151** ERDKLNKYGR PLLGCTIKPK LGLS**AKNYGR** **AVYECLRGGL** DFTKDDENVN  
**201** SQPFMR**WRDR** XLFC**AEALYK** AQSETGEIKG HYL

Matched peptides information:

| Start - End      | Observed         | Mr(expt)         | Mr(calc)         | ppm         | Miss     | Sequence               |
|------------------|------------------|------------------|------------------|-------------|----------|------------------------|
| <b>2 - 11</b>    | <b>935.6005</b>  | <b>934.5933</b>  | <b>934.5236</b>  | <b>75</b>   | <b>1</b> | <b>K.ASAGFKAGVK.D</b>  |
| <b>15 - 25</b>   | <b>1407.7824</b> | <b>1406.7751</b> | <b>1406.6605</b> | <b>81</b>   | <b>0</b> | <b>K.LTYYTPEYETK.D</b> |
| <b>26 - 34</b>   | <b>1021.6585</b> | <b>1020.6512</b> | <b>1020.5240</b> | <b>125</b>  | <b>0</b> | <b>K.DTDILAAFR.V</b>   |
| <b>122 - 127</b> | <b>699.3762</b>  | <b>698.3689</b>  | <b>698.4551</b>  | <b>-123</b> | <b>1</b> | <b>K.ALRALR.L</b>      |
| <b>181 - 187</b> | <b>910.5824</b>  | <b>909.5751</b>  | <b>909.4378</b>  | <b>151</b>  | <b>0</b> | <b>R.AVYECLR.G</b>     |
| <b>207 - 210</b> | <b>632.4319</b>  | <b>631.4246</b>  | <b>631.3190</b>  | <b>167</b>  | <b>1</b> | <b>R.WRDR.X</b>        |

Spot No.: **201**

Mascot score: **112**    Sequence coverage %: **53**

NCBI accession No.: **gi| 20230245**

Matched peptides No.: **12**

Total peptides No.: **25**

Calculated Mr: **26115**

Calculated pI: **6.47**

### Annotated PMF spectra:

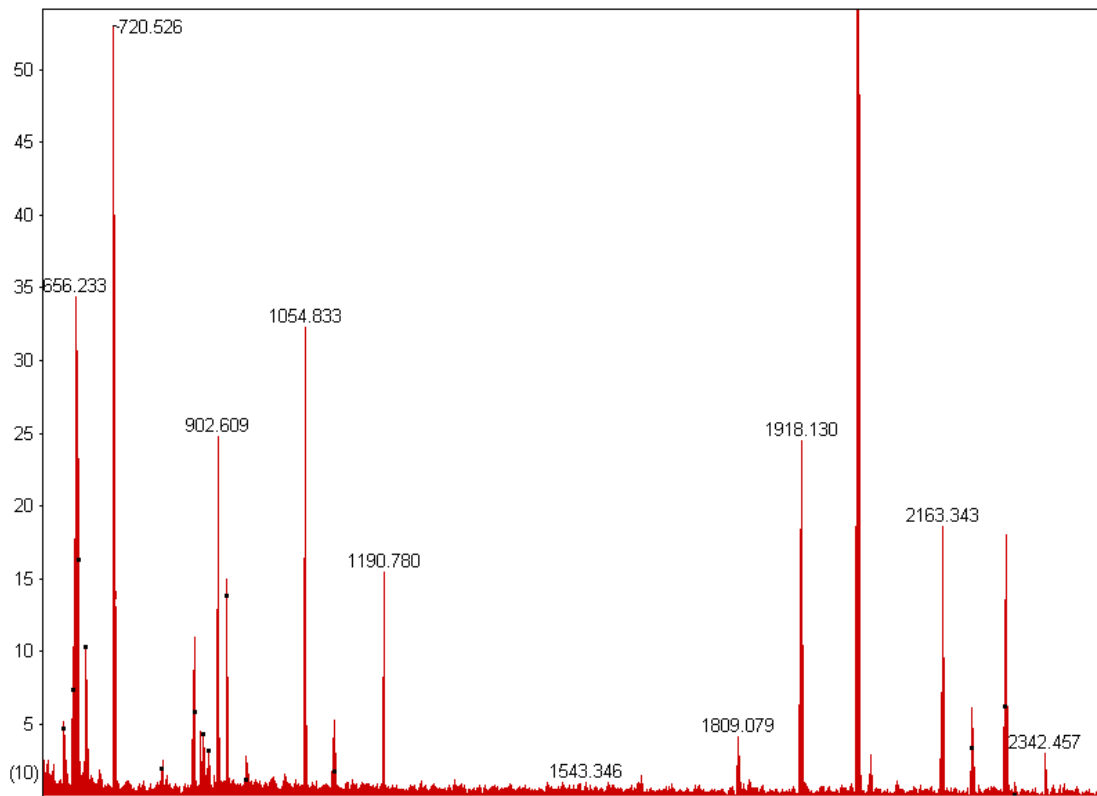

### Probability Based Mowse Score:

Protein score is  $-10 \cdot \log(P)$ , where P is the probability that the observed match is a random event. Protein scores greater than 72 are significant ( $p < 0.05$ ).

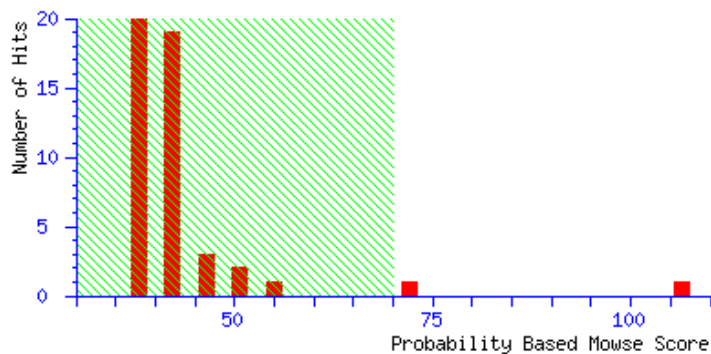

Matched peptide sequences: shown in **Bold Red**

**1** MNDGDVSR**QI** **QQMVR**FIRQE AEEK**ANEISV** **SAEEEFNIEK** LQLVEAEKKK  
**51** **IRQDYEKKEK** **QADV**RKKIDY SMQLNASRIK VLQAQDDIVN AMKDAAAKDL  
**101** LNVSSDANAY KQLLKALIVQ CLLRL**KEPSV** **LLRCRKEDLG** **FVESVLDDAK**  
**151** **EEYAGKAKVH** **APEVAVDTEI** **FLPGPPKSHD** **SHDLHCAGGV** **VLASRDGKIV**  
**201** **CENTLDARLD** **VAFR**MKLPVI RRSLFGQVAA

Matched peptides information:

| Start - End | Observed  | Mr(expt)  | Mr(calc)  | ppm | Miss | Sequence                 |
|-------------|-----------|-----------|-----------|-----|------|--------------------------|
| 9 - 15      | 902.6093  | 901.6020  | 901.4804  | 135 | 0    | R.QIQMVR.F               |
| 9 - 15      | 918.6229  | 917.6156  | 917.4753  | 153 | 0    | R.QIQMVR.F Oxidation (M) |
| 25 - 40     | 1809.0788 | 1808.0715 | 1807.8475 | 124 | 0    | K.ANEISVSAEEEFNIEK.L     |
| 51 - 57     | 951.6292  | 950.6220  | 950.4821  | 147 | 1    | K.IRQDYEK.K              |
| 61 - 65     | 588.4119  | 587.4046  | 587.3027  | 173 | 0    | K.QADV.R.K               |
| 125 - 133   | 1054.8328 | 1053.8255 | 1053.6546 | 162 | 1    | R.LKEPSVLLR.C            |
| 137 - 156   | 2214.3457 | 2213.3384 | 2213.0376 | 136 | 1    | K.EDLGFVESVLDDAKEEYAGK.A |
| 159 - 177   | 2016.3768 | 2015.3695 | 2015.0728 | 147 | 0    | K.VHAPEVAVDTEIFLPGPPK.S  |
| 178 - 195   | 1918.1301 | 1917.1228 | 1916.8912 | 121 | 0    | K.SHDSHDLHCAGGVVLASR.D   |
| 199 - 208   | 1190.7796 | 1189.7723 | 1189.5761 | 165 | 0    | K.IVCENTLDAR.L           |
| 209 - 214   | 720.5262  | 719.5189  | 719.3966  | 170 | 0    | R.LDVAFR.M               |
| 217 - 221   | 597.5257  | 596.5184  | 596.4010  | 197 | 0    | K.LPVIR.R                |

Spot No.: **202**

Mascot score: **86**    Sequence coverage %: **17**

NCBI accession No.: **gi| 15222251**

Matched peptides No.: **10**

Total peptides No.: **24**

Calculated Mr: **45544**

Calculated pI: **5.96**

### Annotated PMF spectra:

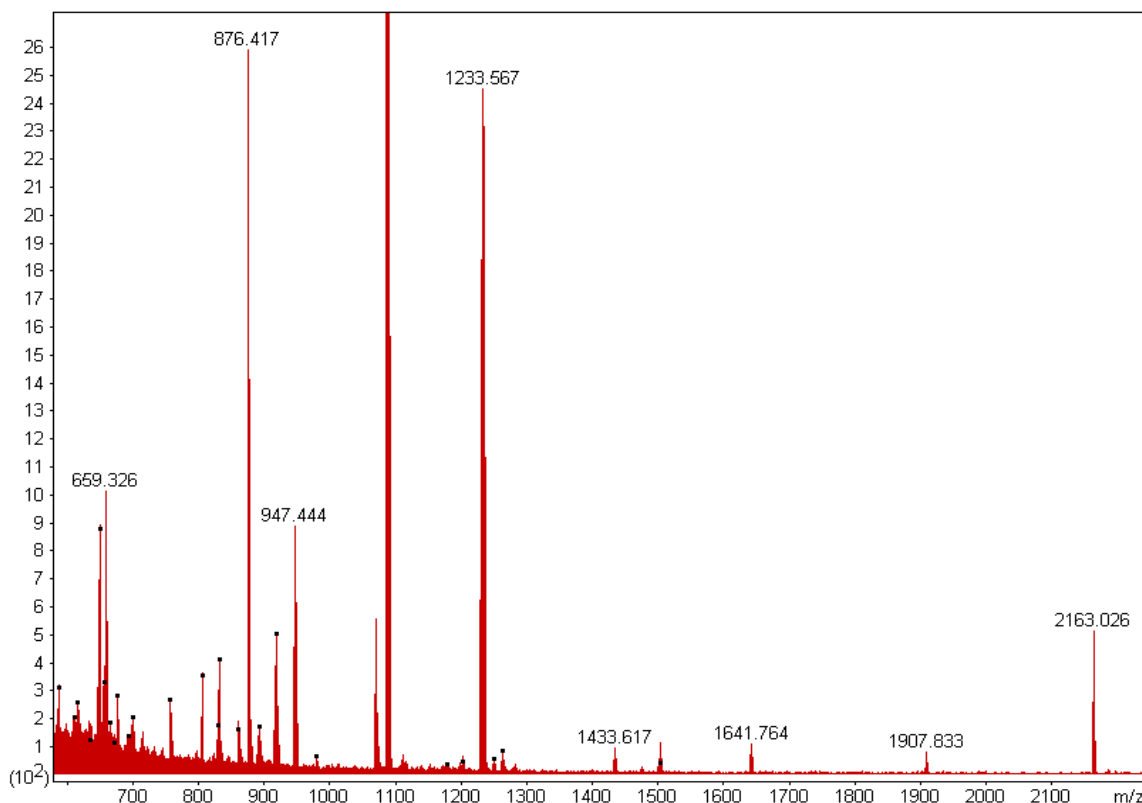

### Probability Based Mowse Score:

Protein score is  $-10 \cdot \log(P)$ , where P is the probability that the observed match is a random event. Protein scores greater than 72 are significant ( $p < 0.05$ ).

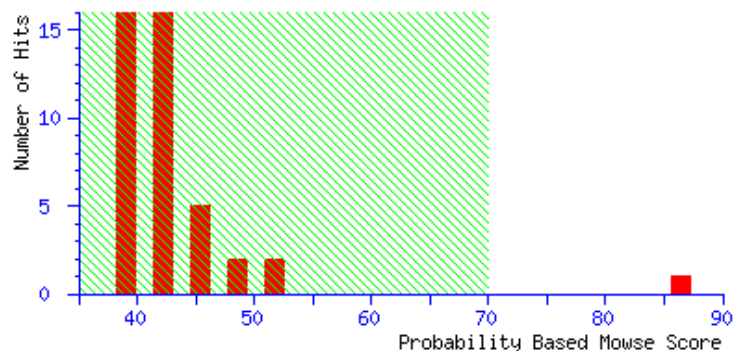

Matched peptide sequences: shown in **Bold Red**

```

1  MGKKLDALLG RSFKTNKFKS LITLALTRLS ILKNQRQARL SQAISDVTEL
51 LKLGQHEHAY HRVDQVVKDQ NTLDVLFFFIH GYFTLCLDRI HLFEHNRDCP
101 EELLEAVSGL LFAASRIGEF PELQEIRNVL ISRFGKDLAA RSIELRSNCG
151 VDPKIIQKLS TRPPPKEVRM KALKEIAAEN NIVLKLDQAS TSTEGTTNMQ
201 GTSDVSKTKL TSKDGRGEGY GLSDSVKRGK KKYKDVADAA QAAFESAAHA
251 AEAQAAAVEL SQFSPRGHDS PGNIGGENSF HGENKESEQ EQEGNDDSSE
301 GEGDVMSESK RSMSDSEDII DVPVMSFRED PVKLLEKDTI IYDSEETQP
351 SVETITISKS KDEQNRMVGS NRADTRHVDH MVRSIEDPIM RKAGLKGPVS
401 VRTRQVRGY

```

Matched peptides information:

| Start - End | Observed  | Mr(expt)  | Mr(calc)  | ppm  | Miss | Sequence        |
|-------------|-----------|-----------|-----------|------|------|-----------------|
| 5 - 11      | 757.4073  | 756.4001  | 756.4494  | -65  | 0    | K.LDALLGR.S     |
| 18 - 28     | 1262.5305 | 1261.5232 | 1261.7758 | -200 | 1    | K.FKSLITLALTR.L |
| 208 - 213   | 677.2529  | 676.2456  | 676.4119  | -246 | 1    | K.TKLTSK.D      |
| 217 - 227   | 1111.4741 | 1110.4668 | 1110.5193 | -47  | 0    | R.GEGYGLSDSVK.R |
| 329 - 333   | 587.1636  | 586.1563  | 586.2962  | -239 | 0    | R.EDPVK.L       |
| 329 - 337   | 1070.4635 | 1069.4562 | 1069.6019 | -136 | 1    | R.EDPVKLEK.D    |
| 360 - 366   | 876.4169  | 875.4096  | 875.4097  | -0   | 1    | K.SKDEQNR.M     |
| 377 - 383   | 893.3443  | 892.3371  | 892.4338  | -108 | 0    | R.HVDHMVR.S     |
| 384 - 392   | 1088.4928 | 1087.4855 | 1087.5695 | -77  | 1    | R.SIEDPIMRK.A   |
| 403 - 407   | 659.3257  | 658.3184  | 658.3875  | -105 | 1    | R.TRQVR.G       |

Spot No.: **203**

Mascot score: **111**    Sequence coverage %: **23**

NCBI accession No.: **gi| 11072026**

Matched peptides No.: **27**

Total peptides No.: **79**

Calculated Mr: **114361**

Calculated pI: **6.69**

### Annotated PMF spectra:

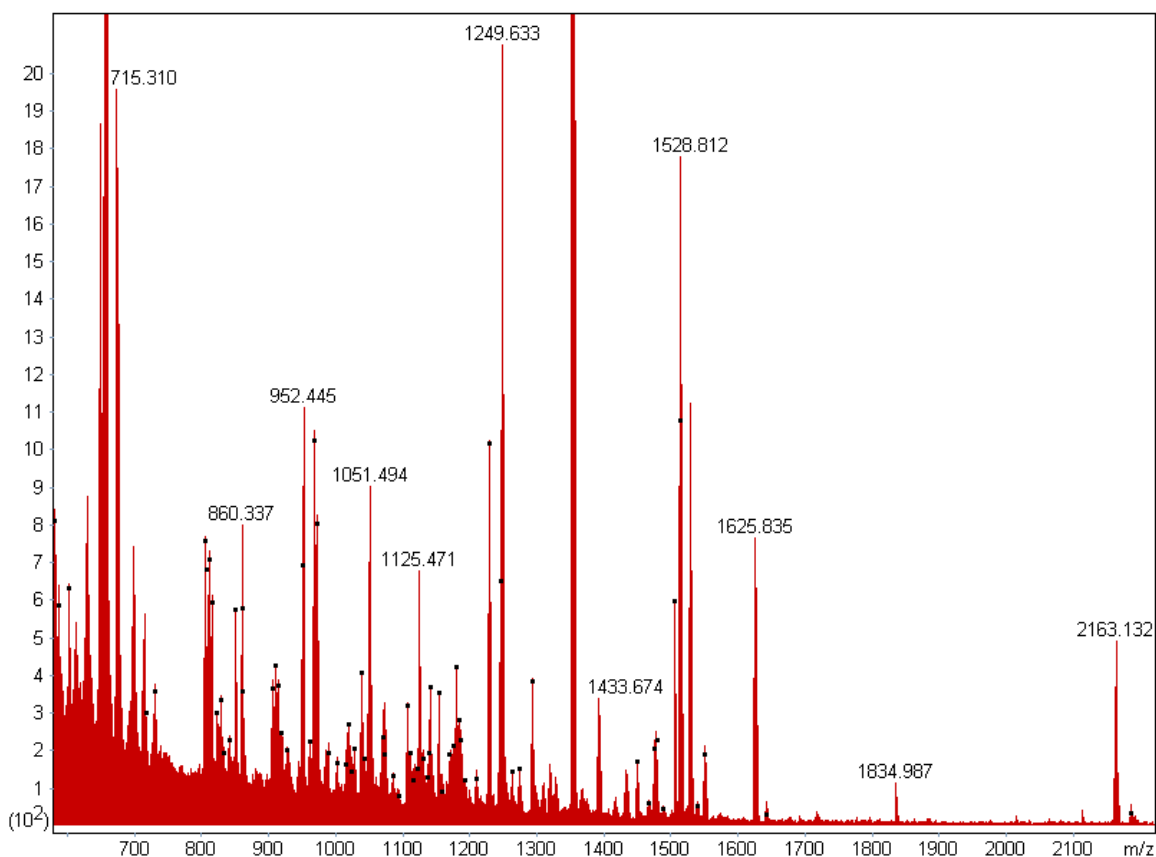

### Probability Based Mowse Score:

Protein score is  $-10 \cdot \log(P)$ , where P is the probability that the observed match is a random event. Protein scores greater than 72 are significant ( $p < 0.05$ ).

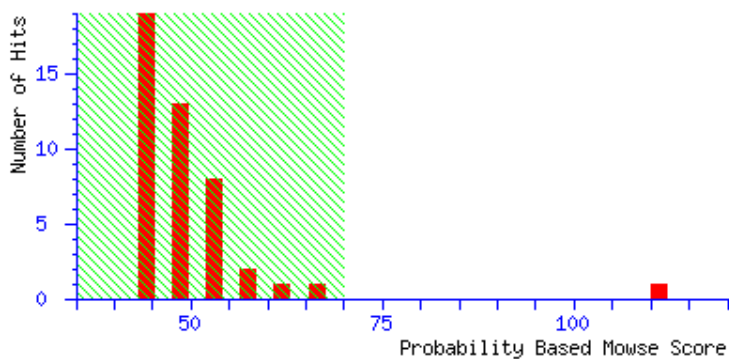

## Matched peptide sequences: shown in **Bold Red**

1 **MTENEGNDKK** IEGSNPKKKL NVVTFTGAAG LPGCDTVCVN LSAKEILDLA  
 51 EEIIHKSTRV HDAVALVSLD KLSYENVVLP LAELEARQLS LIQCCVFPKM  
 101 LSPHDNVRKA STEAEQKIDA HILSCRKRED VYRIIKIYAA KGESISPEAK  
 151 **CYLQCLVRDF** **EDNGLNLTAI** **KREEVERLKY** EIDELSLRYI QNLNEDSSCL  
 201 FFTDELAGL PLEFLQNLK TONKEFKLTL ESR**HVAAIL** **LCKIAKTRKT**  
 251 **VAMAYGKRCG** DTNIPVLQRL VQSRHRLACV CGYAHFADYA LDRRMSK**TSM**  
 301 **RVIRFLEDIS** SSLTDLAIRE **FSILEDLKRK** EEGEIPFGVE DLLYYIKRVE  
 351 ELQFDLDFGD IRQYFPVNLV LSGIFKICQD LFGIKFEEVT EVDVWYHDIR  
 401 **AFAVFDSGSG** **KLLGYFYLD** **FTREGKCNHS** CVVALQNNAL FSNGACQIPV  
 451 ALLIAQFAKD GSGEAVPLGF SDVVNLFHEF GHVVQHICNR ASFAR**FSGLR**  
 501 **VDPDFREIPS** QLLENWQDIT KPLVDEVCKT LKRWRYS**FS** **LKSLQEILYC**  
 551 LFDQIIYSDD DADLLQLIRS **LHPKVMIGLP** VVEGTNPASC FPRAVIGSEA  
 601 TCYSRLWSEV YAADIFASKF GDGHPNLYAG LQFRDKVLAP GGGKEPMELL  
 651 TNFLGREPST QAFIASRTNY NKVRIHEIII FPKPNNLSFL **NKLVVSESSL**  
 701 **NTGRFEEVGL** **ARHSLSRST** **ACRETAVQQR** **RMVFVVEAKG** **KKGMAARQYQ**  
 751 RTPPPMPKIE DDGNPRFVIF IR**MANVYLWY** **PLSIIAGGTT** **AKIMVAAKDN**  
 801 **LLGKYIYKDT** **IARNIAAVIY** **RVNYTSFCLF** LCDVISNCFY LQQDEKEIQK  
 851 TAIKQHRVLR TATEFRYGYK LVENGNMRAA LSTSDVIELP TQDQLKTVFD  
 901 **KVKDYFGDAK** ESFGKLSLNL PGSDEKTEET SDEKAKILVF FTK**MIYNRFT**  
 951 GPEAEQLTLG WLILMSQPSR YGLQK**VTVKI** **LSDGVK**HVAL SLSSTCLV

## Matched peptides information:

| Start - End | Observed  | Mr(expt)  | Mr(calc)  | ppm  | Miss | Sequence                               |
|-------------|-----------|-----------|-----------|------|------|----------------------------------------|
| 2 - 9       | 906.3996  | 905.3924  | 905.3726  | 22   | 0    | M.TENEGNDK.K                           |
| 151 - 158   | 1111.4806 | 1110.4733 | 1110.5314 | -52  | 0    | K.CYLQCLVR.D                           |
| 159 - 171   | 1449.6915 | 1448.6842 | 1448.7147 | -21  | 0    | R.DFEDNGLNLTAIK.R                      |
| 234 - 243   | 1153.4832 | 1152.4759 | 1152.6325 | -136 | 0    | R.HVAAILLELCK.I                        |
| 249 - 257   | 968.4356  | 967.4283  | 967.5161  | -91  | 1    | R.KTVAMAYGK.R                          |
| 298 - 304   | 862.3534  | 861.3461  | 861.4854  | -162 | 1    | K.TSMRVIR.F                            |
| 320 - 329   | 1249.6329 | 1248.6256 | 1248.6714 | -37  | 1    | R.EFSILEDLKR.K                         |
| 401 - 411   | 1085.5281 | 1084.5208 | 1084.5189 | 2    | 0    | R.AFAVFDGSGK.L                         |
| 412 - 423   | 1538.7111 | 1537.7038 | 1537.7639 | -39  | 0    | K.LLGYFYLDMPTR.E                       |
| 496 - 506   | 1308.6358 | 1307.6285 | 1307.6622 | -26  | 1    | R.FSGLRVDPDFR.E                        |
| 536 - 542   | 815.4044  | 814.3971  | 814.4225  | -31  | 0    | R.YSFSALK.S                            |
| 570 - 574   | 581.3037  | 580.2964  | 580.3333  | -64  | 0    | R.SLHPK.V                              |
| 693 - 712   | 2163.1320 | 2162.1247 | 2162.1331 | -4   | 1    | K.LVVSESSLNTGRFEEVGLAR.H               |
| 713 - 719   | 833.3079  | 832.3006  | 832.4191  | -142 | 0    | R.HSLFSSR.T                            |
| 720 - 730   | 1319.4103 | 1318.4030 | 1318.6412 | -181 | 1    | R.TACRETAVQQR.R                        |
| 731 - 739   | 1094.4068 | 1093.3995 | 1093.5954 | -179 | 1    | R.RMVVFVEAK.G Oxidation (M)            |
| 732 - 741   | 1107.4971 | 1106.4898 | 1106.6158 | -114 | 1    | R.RMVVFVEAKGK.K                        |
| 732 - 741   | 1123.4776 | 1122.4703 | 1122.6107 | -125 | 1    | R.RMVVFVEAKGK.K Oxidation (M)          |
| 742 - 747   | 633.2643  | 632.2570  | 632.3428  | -136 | 1    | K.KGMAAR.Q                             |
| 773 - 792   | 2185.1100 | 2184.1027 | 2184.1289 | -12  | 0    | R.MANVYLWYPLSIIAGGTTAK.I Oxidation (M) |
| 799 - 804   | 659.3428  | 658.3355  | 658.3650  | -45  | 0    | K.DNLLGK.Y                             |
| 809 - 821   | 1475.7233 | 1474.7160 | 1474.8256 | -74  | 1    | K.DTIARNIAAVIYR.V                      |
| 814 - 821   | 919.4327  | 918.4254  | 918.5287  | -112 | 0    | R.NIAAVIYR.V                           |
| 902 - 910   | 1042.4865 | 1041.4792 | 1041.5131 | -33  | 1    | K.VKDYFGDAK.E                          |
| 944 - 948   | 696.2942  | 695.2869  | 695.3425  | -80  | 0    | K.MIYNR.F                              |
| 976 - 986   | 1158.4856 | 1157.4783 | 1157.7020 | -193 | 1    | K.VTVKILSDGVK.H                        |
| 980 - 986   | 731.3150  | 730.3077  | 730.4225  | -157 | 0    | K.ILSDGVK.H                            |

Spot No.: **204**

Mascot score: **117**    Sequence coverage %: **23**

NCBI accession No.: **gi| 31593440**

Matched peptides No.: **11**

Total peptides No.: **29**

Calculated Mr: **36256**

Calculated pI: **7.07**

### Annotated PMF spectra:

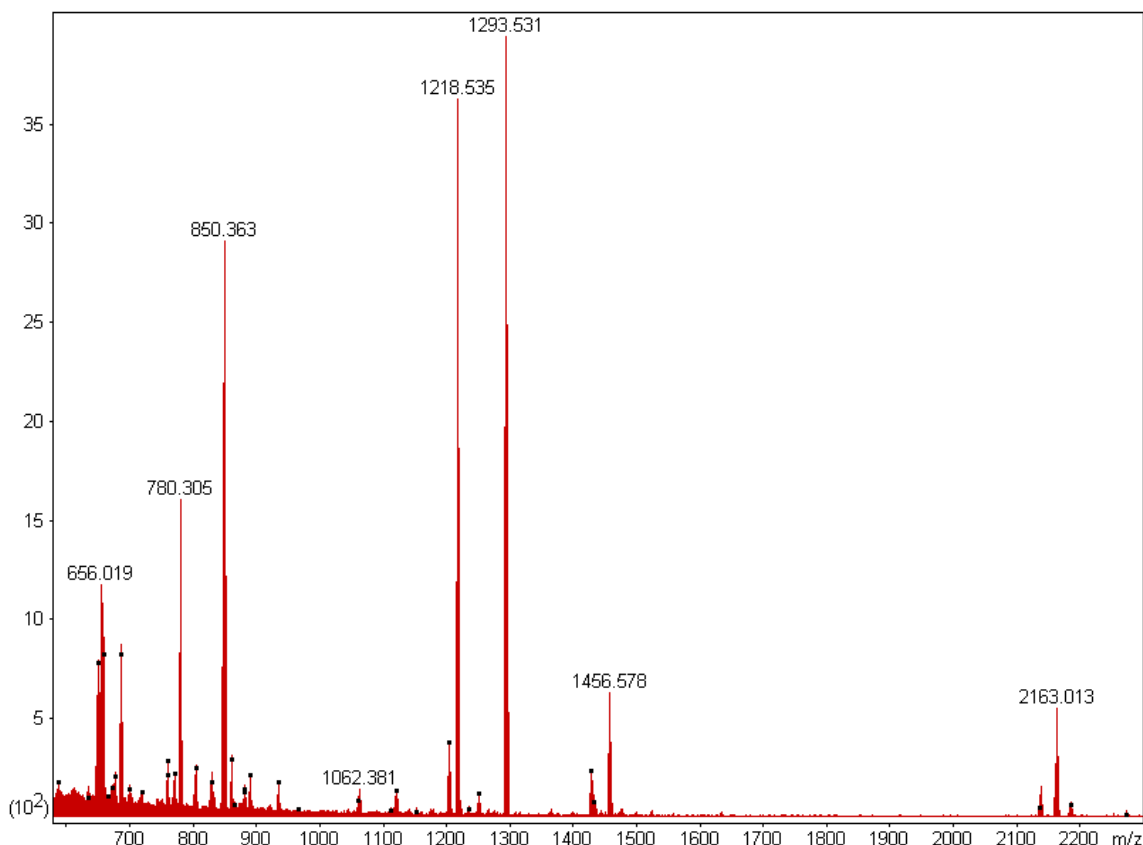

### Probability Based Mowse Score:

Protein score is  $-10 \cdot \log(P)$ , where P is the probability that the observed match is a random event. Protein scores greater than 72 are significant ( $p < 0.05$ ).

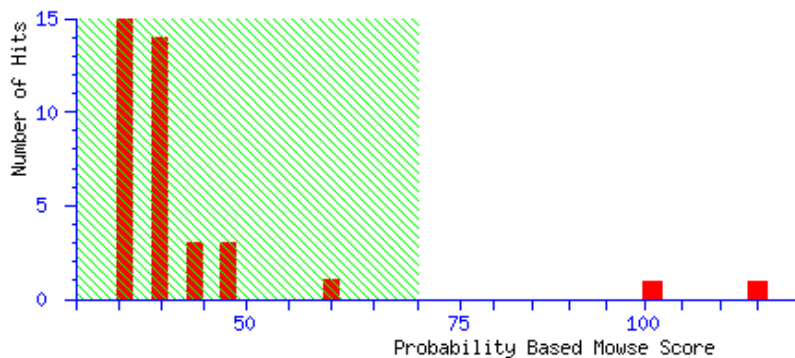



Matched peptide sequences: shown in **Bold Red**

```

1 MAEGLVLKGT MCAHTDMVTA IATPVDNSDV IVTSSRDKSI ILWKLTKEDK
51 SYGVAQRRMT GHSHFVQDVV LSSDGQFALS GSWDGELRLW DLATGESTRR
101 FVGHTKDVLS VAFSTDNRQI VSASRDRTIK LWNTLGECKY TISEADGHKE
151 WVSCVRFSPN TLVPTIVSAS WDKTVKVWNL QNCKLRNTLA GHSGYLNTVA
201 VSPDGSLCAS GKDGVILLW DLAEGKLYS LEAGSIIHSL CFSPNRYWLC
251 AATENSIRIW DLESKSVVED LKVDLKAEAE KTDGSTGIGN KTKVIYCTSL
301 NWSADGNTLF SGYTHGVIRW WGIGRY

```

Matched peptides information:

| Start - End | Observed  | Mr(expt)  | Mr(calc)  | ppm  | Miss | Sequence          |
|-------------|-----------|-----------|-----------|------|------|-------------------|
| 39 - 44     | 759.3563  | 758.3490  | 758.4690  | -158 | 0    | K.SIILWK.L        |
| 48 - 57     | 1152.4356 | 1151.4283 | 1151.5571 | -112 | 1    | K.EDKSYGVAQR.R    |
| 51 - 57     | 780.3047  | 779.2974  | 779.3926  | -122 | 0    | K.SYGVAQR.R       |
| 119 - 125   | 760.3113  | 759.3040  | 759.4239  | -158 | 0    | R.QIVSASR.D       |
| 140 - 149   | 1120.3747 | 1119.3674 | 1119.5196 | -136 | 0    | K.YTISEADGHK.E    |
| 150 - 156   | 935.3391  | 934.3318  | 934.4331  | -108 | 0    | K.EWVSCVR.F       |
| 177 - 184   | 1061.3694 | 1060.3621 | 1060.5124 | -142 | 0    | K.VWNLQNCK.L      |
| 214 - 226   | 1428.6363 | 1427.6290 | 1427.7660 | -96  | 0    | K.DGVILLWDLAEGK.K |
| 259 - 265   | 890.3339  | 889.3266  | 889.4545  | -144 | 0    | R.IWDLESK.S       |
| 320 - 325   | 687.3212  | 686.3140  | 686.3864  | -106 | 0    | R.VWGIGR.Y        |
| 320 - 326   | 850.3626  | 849.3553  | 849.4497  | -111 | 1    | R.VWGIGRY.-       |

Spot No.: **205**

Mascot score: **107**    Sequence coverage %: **32**

NCBI accession No.: **gi| 312282483**

Matched peptides No.: **13**

Total peptides No.: **27**

Calculated Mr: **34165**

Calculated pI: **8.40**

### Annotated PMF spectra:

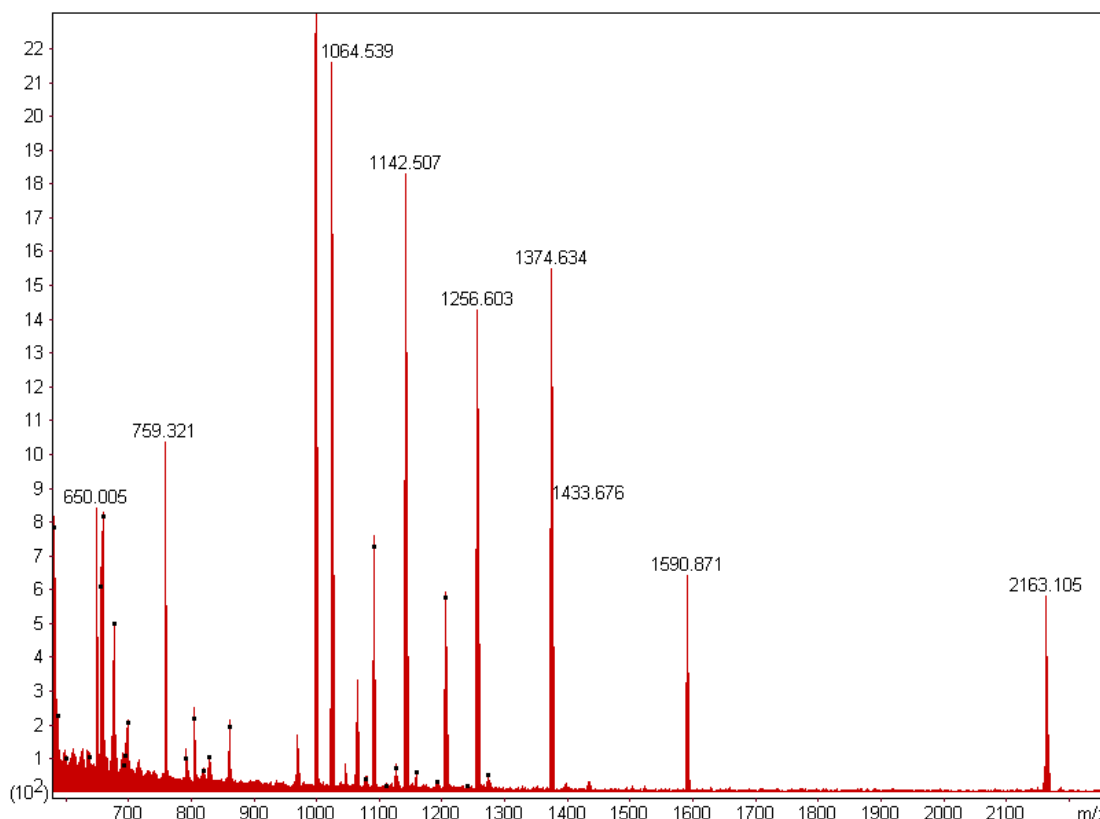

### Probability Based Mowse Score:

Protein score is  $-10 \cdot \log(P)$ , where  $P$  is the probability that the observed match is a random event. Protein scores greater than 72 are significant ( $p < 0.05$ ).

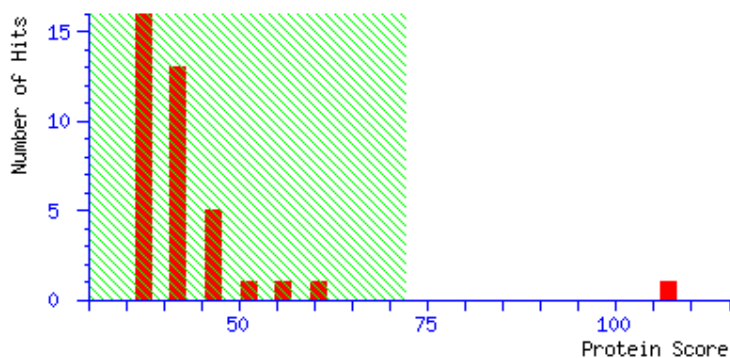

Matched peptide sequences: shown in **Bold Red**

1 MATVANFLAK PIATVVPRLS SAGASTSSFI FFDPKPNSLL LKQSLIRIPS  
 51 RRRLSAVKVK AGAASPGKVG SPAAKDEKVQ **KIHSGEEFDE** ALKNAKNKLV  
 101 **VAEFATSKSD** QSNKIYPFMV **DLSRTCNDVV** FLLIMGDESE KTRELCRREK  
 151 **IEKVPHFSFY** **KSMEKIHEEE** GIGPDQLMGD VLYYGDNHSA VVQLHGRADV  
 201 **EKLIDENRTG** **GKLIVLDVGL** **KHCGPCVKVY** **PTVLKLSRSM** **SETVVFARMN**  
 251 **GDENDSCMEF** **LKDMNVIEVP** **TLFIRDGDI** **CGRYVGSKG** **ELIGEILRYS**  
 301 **GVRVTY**

Matched peptides information:

| Start - End | Observed  | Mr (expt) | Mr (calc) | ppm  | Miss | Sequence                     |
|-------------|-----------|-----------|-----------|------|------|------------------------------|
| 82 - 93     | 1374.6344 | 1373.6271 | 1373.6463 | -14  | 0    | K.IHSGEEFDEALK.N             |
| 99 - 108    | 1064.5391 | 1063.5318 | 1063.5914 | -56  | 0    | K.LVVAEFATSK.S               |
| 115 - 124   | 1256.6028 | 1255.5955 | 1255.6271 | -25  | 0    | K.IYPFMVDLSR.T Oxidation (M) |
| 154 - 161   | 1024.4627 | 1023.4554 | 1023.5178 | -61  | 0    | K.VPHFSFYK.S                 |
| 203 - 208   | 759.3207  | 758.3134  | 758.3922  | -104 | 0    | K.LIDENR.T                   |
| 213 - 221   | 969.5574  | 968.5502  | 968.6270  | -79  | 0    | K.LIVLDVGLK.H                |
| 229 - 235   | 819.3687  | 818.3614  | 818.4902  | -157 | 0    | K.VYPTVLK.L                  |
| 239 - 248   | 1126.5249 | 1125.5176 | 1125.5488 | -28  | 0    | R.SMSETVVFAR.M               |
| 239 - 248   | 1142.5074 | 1141.5001 | 1141.5438 | -38  | 0    | R.SMSETVVFAR.M Oxidation (M) |
| 277 - 283   | 792.2572  | 791.2500  | 791.3232  | -93  | 0    | R.DGDICGR.Y                  |
| 284 - 298   | 1590.8706 | 1589.8633 | 1589.8777 | -9   | 1    | R.YVGSGRGELIGEILR.Y          |
| 290 - 298   | 999.5293  | 998.5220  | 998.5760  | -54  | 0    | K.GELIGEILR.Y                |
| 299 - 303   | 581.2171  | 580.2099  | 580.2969  | -150 | 0    | R.YSGVR.V                    |

Spot No.: **206**

Mascot score: **137**    Sequence coverage %: **38**

NCBI accession No.: **gi| 15237225**

Matched peptides No.: **19**

Total peptides No.: **59**

Calculated Mr: **44133**

Calculated pI: **6.79**

### Annotated PMF spectra:

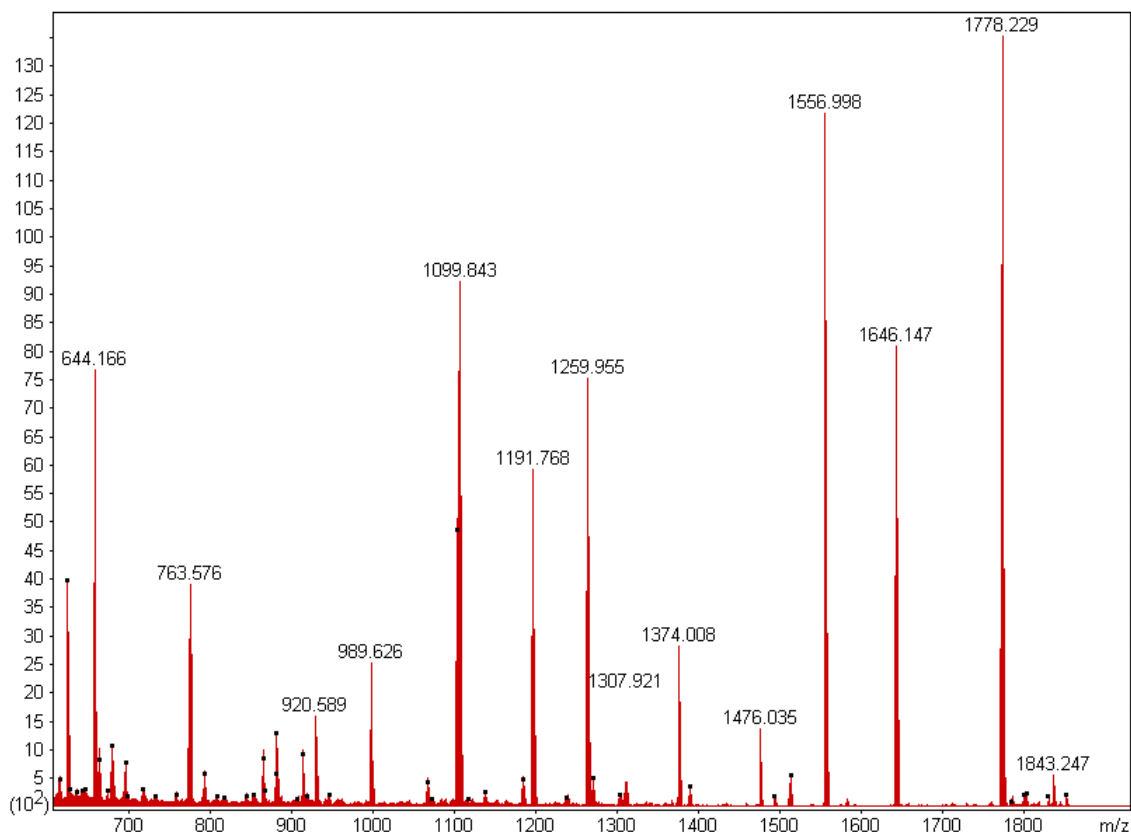

### Probability Based Mowse Score:

Protein score is  $-10 \cdot \log(P)$ , where P is the probability that the observed match is a random event. Protein scores greater than 72 are significant ( $p < 0.05$ ).

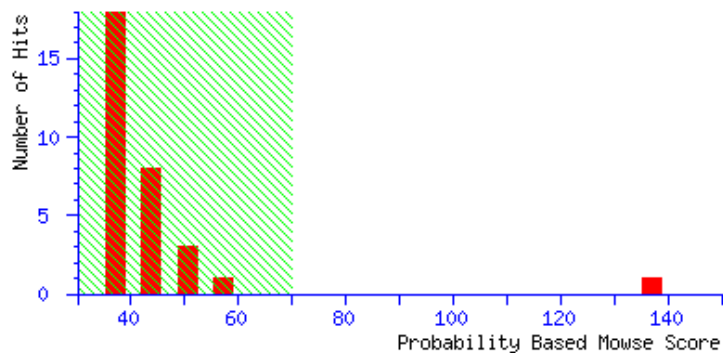

## Matched peptide sequences: shown in **Bold Red**

```

1  MASLQLCDGY LFKPSVSPR FLSQRISHRL IPKASSSPPP SPSPPSSSSSS
51  LSFSRRELLY QSAAVSLSLS SIVGPARADE QLSEWERVFL PIDPGVVLLD
101 IAFVPDEPSR GFLLGTRQTL LETKDGGSTW NPRSIPSAEE EDFNYRFNSI
151 SFKGKEGWII GKPAILLYTA DAGENWDRIP LSSQLPGDMV FIKATEDKSA
201 EMVTDEGAIY VTSNRGYNWK AAIQETVSAT LNRTVSSGIS GASYYTGTFS
251 AVNRSPDGRY VAVSSRGNFF LTWEPGOPYW QPHNRAVARR IQNMGWRADG
301 GLWLLVRGGG LYLSKGTGIT EEFEEVPVQS RFGGILDVGY RSEEEAWAAG
351 GSGILLRTRN GGKSWNRDKA ADNIAANLYA VKFVDDKKGF VLGNDGVLLR
401 YVG

```

## Matched peptides information:

| Start - End | Observed  | Mr(expt)  | Mr(calc)  | ppm  | Miss | Sequence                                    |
|-------------|-----------|-----------|-----------|------|------|---------------------------------------------|
| 21 - 25     | 650.1781  | 649.1708  | 649.3548  | -283 | 0    | R.FLSQR.I                                   |
| 111 - 117   | 763.5756  | 762.5684  | 762.4388  | 170  | 0    | R.GFLLGTR.Q                                 |
| 125 - 133   | 989.6257  | 988.6184  | 988.4363  | 184  | 0    | K.DGGSTWNPR.S                               |
| 134 - 146   | 1556.9981 | 1555.9908 | 1555.6790 | 200  | 0    | R.SIPSAEEEDFN <b>YR.F</b>                   |
| 147 - 153   | 842.5801  | 841.5728  | 841.4334  | 166  | 0    | R.FNSISFK.G                                 |
| 199 - 215   | 1843.2470 | 1842.2397 | 1841.8465 | 213  | 0    | K.SAEMVTDEGA <b>IYVTSNR.G</b>               |
| 199 - 215   | 1859.2700 | 1858.2627 | 1857.8414 | 227  | 0    | K.SAEMVTDEGA <b>IYVTSNR.G</b> Oxidation (M) |
| 221 - 233   | 1374.0083 | 1373.0010 | 1372.7310 | 197  | 0    | K.AAIQETVSAT <b>LNRT</b>                    |
| 260 - 266   | 781.5462  | 780.5389  | 780.4130  | 161  | 0    | R.YVAVSSR.G                                 |
| 290 - 297   | 1060.2752 | 1059.2679 | 1059.5396 | -256 | 1    | R.RIQNMGWR.A                                |
| 291 - 297   | 904.6007  | 903.5934  | 903.4385  | 171  | 0    | R.IQNMGWR.A                                 |
| 291 - 297   | 920.5887  | 919.5815  | 919.4334  | 161  | 0    | R.IQNMGWR.A Oxidation (M)                   |
| 298 - 307   | 1099.8434 | 1098.8361 | 1098.6186 | 198  | 0    | R.ADGG <b>LWLLVR.G</b>                      |
| 316 - 331   | 1778.2292 | 1777.2219 | 1776.8530 | 208  | 0    | K.GTGITEEFEEVPVQ <b>SR.G</b>                |
| 332 - 341   | 1096.7769 | 1095.7696 | 1095.5713 | 181  | 0    | R.GFGILDV <b>GYR.S</b>                      |
| 342 - 357   | 1646.1471 | 1645.1398 | 1644.8107 | 200  | 0    | R.SEEEAWAAGGS <b>GILLR.T</b>                |
| 364 - 369   | 805.5284  | 804.5212  | 804.3878  | 166  | 1    | K.SWNRDK.A                                  |
| 388 - 400   | 1388.0591 | 1387.0518 | 1386.7983 | 183  | 1    | K.KGFVLGNDG <b>VLLR.Y</b>                   |
| 389 - 400   | 1259.9550 | 1258.9477 | 1258.7034 | 194  | 0    | K.GFVLGNDG <b>VLLR.Y</b>                    |

Spot No.: **207**

Mascot score: **81**    Sequence coverage %: **27**

NCBI accession No.: **gi| 308802434**

Matched peptides No.: **8**

Total peptides No.: **25**

Calculated Mr: **34223**

Calculated pI: **6.02**

### Annotated PMF spectra:

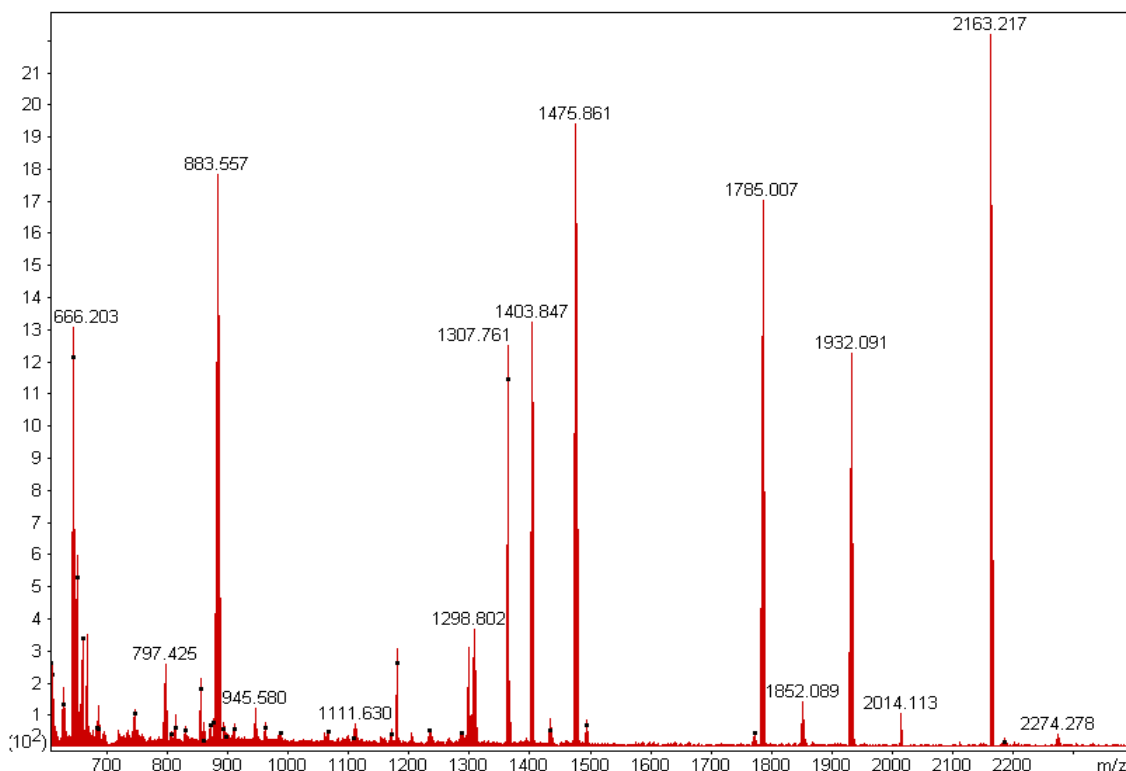

### Probability Based Mowse Score:

Protein score is  $-10 \cdot \log(P)$ , where P is the probability that the observed match is a random event. Protein scores greater than 72 are significant ( $p < 0.05$ ).

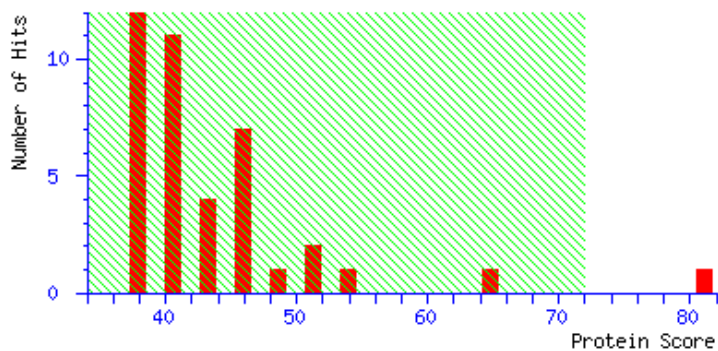

Matched peptide sequences: shown in **Bold Red**

**1 MENYEKVAKI** GEGTYGVVYK AKSLRDDAMV **ALKRIRLDQD** **DEGVPSTAIR**  
**51 EISLLKELRH** **ENVVSLLEVI** **HEETKLYLVF** **EYLDLDLKKH** MDSSPHISND  
**101 RMVIKGYVYQ** ICAGIAFCHS HRVLHRDLKP QNLLIDTTNN VLKLADFGLA  
**151 RAFGIPVRAY** THEVVTWYR APEILLGVRT YSTPVDVWSI GCIMAEMVNH  
**201 APLFPGDSEI** DELFKIFKTL GTPGETLWPE AKQLPDYQEG FPKWKAKPWE  
**251 SLCPALDEAG** VDLLRSLLQY SPEKRISAKY ATQHR**WFDDY** **REHIGR**

Matched peptides information:

| Start - End | Observed  | Mr(expt)  | Mr(calc)  | ppm | Miss | Sequence                      |
|-------------|-----------|-----------|-----------|-----|------|-------------------------------|
| 1 - 6       | 829.3909  | 828.3837  | 828.3323  | 62  | 0    | -.MENYEK.V Oxidation (M)      |
| 1 - 9       | 1111.6301 | 1110.6228 | 1110.5379 | 76  | 1    | -.MENYEKVAK.I                 |
| 2 - 6       | 682.2832  | 681.2759  | 681.2969  | -31 | 0    | M.ENYEK.V                     |
| 23 - 33     | 1234.7328 | 1233.7255 | 1233.6387 | 70  | 1    | K.SLRDDAMVALK.R Oxidation (M) |
| 35 - 50     | 1785.0070 | 1783.9997 | 1783.9064 | 52  | 1    | R.IRLDQDDEGVPSTAIR.E          |
| 57 - 75     | 2274.2778 | 2273.2705 | 2273.2015 | 30  | 1    | K.ELRHENVVSLLEVIHEETK.L       |
| 76 - 89     | 1771.8974 | 1770.8901 | 1770.9807 | -51 | 1    | K.LYLVFEYLDLDLKK.H            |
| 286 - 296   | 1493.8237 | 1492.8164 | 1492.6848 | 88  | 1    | R.WFDDYREHIGR.-               |

Spot No.: **208**

Mascot score: **133**    Sequence coverage %: **36**

NCBI accession No.: **gi| 166359602**

Matched peptides No.: **12**

Total peptides No.: **25**

Calculated Mr: **24136**

Calculated pI: **6.17**

### Annotated PMF spectra:

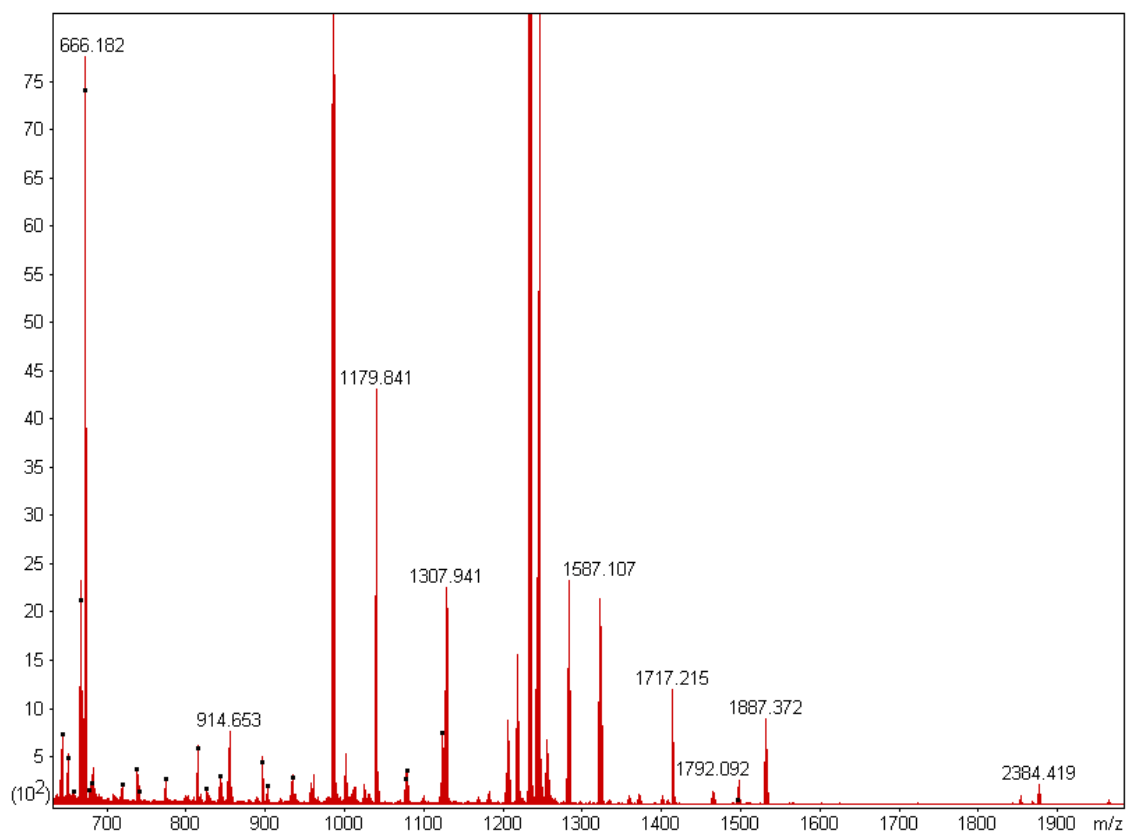

### Probability Based Mowse Score:

Protein score is  $-10 \cdot \log(P)$ , where P is the probability that the observed match is a random event. Protein scores greater than 72 are significant ( $p < 0.05$ ).

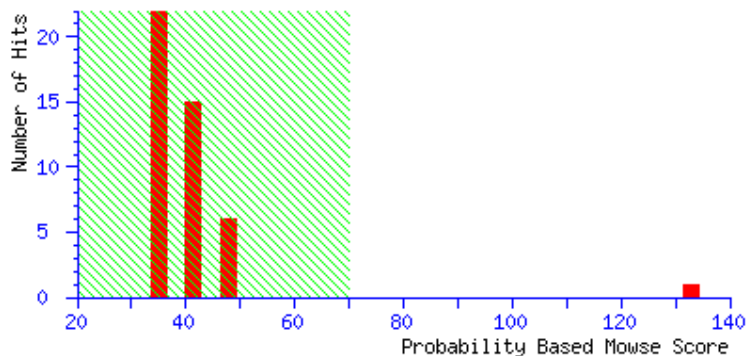



Matched peptide sequences: shown in **Bold Red**

**1** MVLK**VYGPHE** **ASP**KRALVTL **VEK**GVAFETI **PVD**LMKGEHK QPAYLALQPF  
**51** GTVPAVVVDGD YK**IFES**RAVM **RYVAEK**YRSQ **GP**DLLGKTVE **DR**GQVEQWLD  
**101** VEATTYHPPL LNLTLHVMFA SVMGF PADQK LIKESEEK**LA** **AV**LDVYEAHL  
**151** **SK**SKYLAGDF VSLADLAHLP FTDYLVGPIG KAYMIKDRKH VSAWDDISS  
**201** RPAWKEVLEK YSLPA

Matched peptides information:

| Start - End | Observed  | Mr(expt)  | Mr(calc)  | ppm | Miss Sequence                         |
|-------------|-----------|-----------|-----------|-----|---------------------------------------|
| 5 - 14      | 1102.7894 | 1101.7821 | 1101.5607 | 201 | 0 K.VYGPHEASPK.R                      |
| 15 - 23     | 1028.8322 | 1027.8249 | 1027.6390 | 181 | 1 K.RALVTLVEK.G                       |
| 16 - 23     | 872.6784  | 871.6711  | 871.5379  | 153 | 0 R.ALVTLVEK.G                        |
| 24 - 36     | 1420.0190 | 1419.0117 | 1418.7479 | 186 | 0 K.GVAFETIPVDLMK.G                   |
| 24 - 36     | 1436.0269 | 1435.0196 | 1434.7429 | 193 | 0 K.GVAFETIPVDLMK.G Oxidation (M)     |
| 24 - 40     | 1887.3719 | 1886.3646 | 1885.9608 | 214 | 1 K.GVAFETIPVDLMKGEHK.Q Oxidation (M) |
| 63 - 67     | 651.4568  | 650.4496  | 650.3388  | 170 | 0 K.IFESR.A                           |
| 63 - 71     | 1124.7697 | 1123.7624 | 1123.5808 | 162 | 1 K.IFESRAVMR.Y Oxidation (M)         |
| 72 - 76     | 609.4631  | 608.4558  | 608.3170  | 228 | 0 R.YVAEK.Y                           |
| 79 - 87     | 914.6525  | 913.6453  | 913.4869  | 173 | 0 R.SQGPDLLGK.T                       |
| 88 - 92     | 619.4001  | 618.3928  | 618.2973  | 154 | 0 K.TVEDR.G                           |
| 139 - 152   | 1529.1700 | 1528.1627 | 1527.8297 | 218 | 0 K.LAAVLDVYEAHLSK.S                  |

Spot No.: **209**

Mascot score: **115**    Sequence coverage %: **32**

NCBI accession No.: **gi| 15240250**

Matched peptides No.: **9**

Total peptides No.: **32**

Calculated Mr: **30275**

Calculated pI: **8.24**

### Annotated PMF spectra:

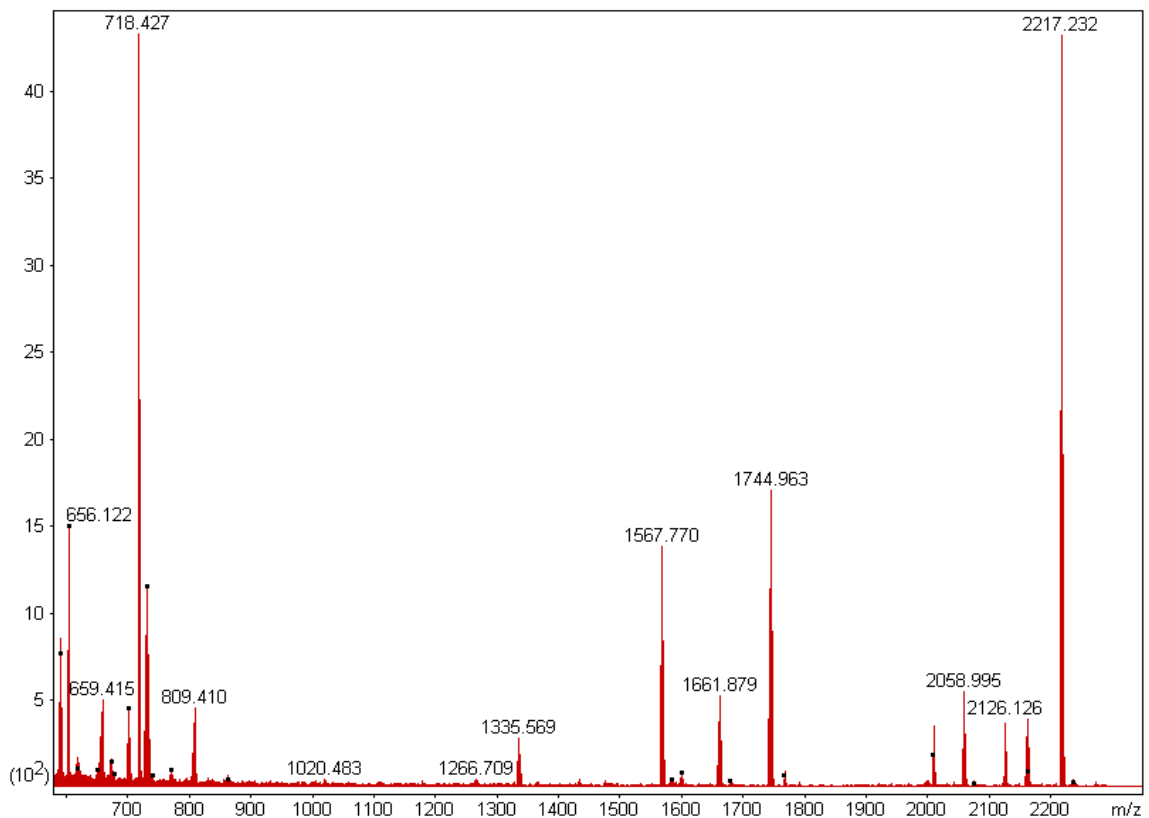

### Probability Based Mowse Score:

Protein score is  $-10 \cdot \log(P)$ , where P is the probability that the observed match is a random event. Protein scores greater than 72 are significant ( $p < 0.05$ ).

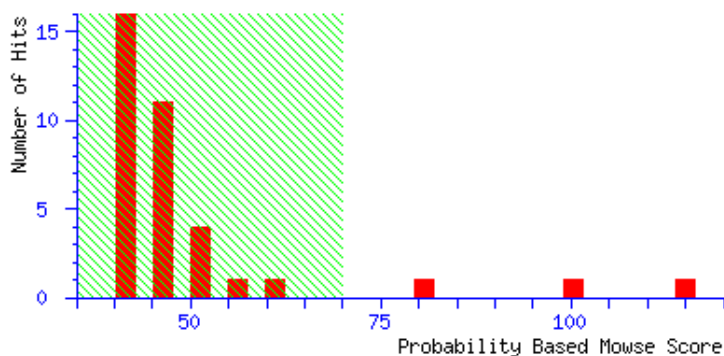

Matched peptide sequences: shown in **Bold Red**

**1** MSTSAASLCC SSTQVNGFGL RPERSLLYQP TSFSFSRRRT HGIVKASSRV  
**51** DRFSK**SDIIV SPSILSANFA KLGEQKAVE LAGCDWIHVD VMDGRFVPMI**  
**101** TIGPLVVDAL RPVTDLPLDV HLMIVEPEQR **VPDFIKAGAD** IVSVHCEQQS  
**151** TIHLHR**TVNQ IKSLGAKAGV** VLNPGTPLSA IEYVLDMVDL VLIMSVNPGF  
**201** GGQSFIESQV **KKISDLRKMC** AEKGVNPNWIE VGGVTPANA **YKVIEAGANA**  
**251** **LVAGSAVFGA KDYAEAIKGI KASKRPAAVA** V

Matched peptides information:

| Start - End | Observed  | Mr(expt)  | Mr(calc)  | ppm | Miss | Sequence                             |
|-------------|-----------|-----------|-----------|-----|------|--------------------------------------|
| 56 - 71     | 1661.8793 | 1660.8720 | 1660.9036 | -19 | 0    | K.SDIIVSPSILSANFAK.L                 |
| 72 - 77     | 673.4064  | 672.3991  | 672.3806  | 27  | 0    | K.LGEQVK.A                           |
| 78 - 95     | 2058.9948 | 2057.9875 | 2057.9299 | 28  | 0    | K.AVELAGCDWIHVDVMDGR.F Oxidation (M) |
| 131 - 136   | 718.4271  | 717.4199  | 717.4061  | 19  | 0    | R.VPDFIK.A                           |
| 157 - 162   | 702.4192  | 701.4119  | 701.4072  | 7   | 0    | R.TVNQIK.S                           |
| 213 - 218   | 731.4594  | 730.4521  | 730.4337  | 25  | 1    | K.ISDLRK.M                           |
| 243 - 261   | 1744.9625 | 1743.9552 | 1743.9519 | 2   | 0    | K.VIEAGANALVAGSAVFGAK.D              |
| 262 - 268   | 809.4098  | 808.4025  | 808.3967  | 7   | 0    | K.DYAEAIK.G                          |
| 269 - 274   | 603.3912  | 602.3839  | 602.3751  | 15  | 1    | K.GIKASK.R                           |
