# Supplementary material
Source: PubMed Central journal article supplement (PMC3734578)
Supplement: supp_M112.022475_mcp.M112.022475-9.pdf [file supp_M112.022475_mcp.M112.022475-9.pdf]

## Primers used in RT-PCR and qRT-PCR

### Spot 8:

W8F3: 5' - AAGGACAGGGTGAACAAAGTGGAT-3'

W8R3: 5' - CTGACCAAACTGAAGTGGGAAACC-3'

### Spot 10:

W10F1: 5' - AGCCGTCACTAATCCAACAAAC-3'

W10R1: 5' - GTCAACACAAATGCTCCAACCT-3'

### Spot 11:

W11F1: 5' - CACATCTACAGGAGCGGCTAAA-3'

W11R1: 5' - GAAGAATCAATGGTCGAGGACA-3'

### Spot 29:

W29F2: 5' - GATTCCTCTGGCATCTTTT -3'

W29R2: 5' - AGCTGAATACCCACTGGTT -3'

### Spot 38:

W38F2: 5' - CACGACGTTCTTGCCGCCTT -3'

W38R2: 5' - CCGCCCGGTCAATATTTTCC-3'

### Spot 39:

W39F3: 5' - ACCTTCCGCTCTCACCGTTC -3'

W39R3: 5' - CGACGAGGACATCGACCATT -3'

### Spot 48:

W48F2:5' - GCACGCAAGAAGAAGTGAACAA -3'

W48R2:5' - GAATAGCCAAAACCACACCAAG -3'

**Spot 81:**

W81F1: 5' - AGGCAATACTTGTGGTTGTTTCG-3'

W81R1: 5' - ATAAGGCATTTCCCTTGGCTCTC-3'

**Spot 83:**

W83F2: 5' - ATGCTATTCTTGCTGTCTCTCTT -3'

W83R2: 5' - CATCCTGACCGTACTTCTTCTTA -3'

**Spot 109:**

W109F1: 5' -AGTTGGTCGATGCTGCTTT-3'

W109R1: 5' -GGATCAATGCGTTGGTGTTT-3'

**Spot 110:**

W110F1: 5' - ACGAGCACGAATACAAGTCC-3'

W110R1: 5' - TGAGTTGTGGAAGCACCTTT-3'

**Spot 113:**

W113F3: 5' - CTCCTTCGCAACAGAATCCCT-3'

W113R3: 5' -TTTACAAACATACCCTCCTTAGCAT-3'

**Spot 118:**

W118F1: 5' -CATTGATCTTTATTACCAGCATCG-3'

W118R1: 5' - TCGCCCACAAGGACCACTCTA-3'

**Spot 128:**

W128F1: 5' - TTGGACTGTCATCCCGAAAC-3'

W128R1: 5' - CTCAAGTCCTTCTGGCGTAA-3'

**Spot 149:**

W149F2: 5'-CTTCGAGCCAACTTCCTTCA-3'

W149R2: 5'-CCACAGCATTATCATACCCA-3'

**Spot 151:**

W151F3: 5'-GAGGCAACCACTTACCACCCA-3'

W151R3: 5'-GCTGCTAATATCGTCCCACCA-3'

**Spot 157:**

W157F1: 5'-ACAAACCGATGGAGACAGAT-3'

W157R1: 5'-GGAAGGATTTACCTTGACCT-3'

**Spot 173:**

W173F3: 5'-ATGTCTCCCTCGCTCGTCAG-3'

W173R3: 5'-TCGGGTGGAGCTTCACTCTT-3'

**Spot 191:**

W191F1: 5'-GGAGACTATGGATTTGACCC-3'

W191R1: 5'-TGCCCAGTAACTGTATGTCC-3'

**Spot 192:**

W192F1: 5'-AACACAGACTTCACGGCATAACA-3'

W192R1: 5'-CCTGAGAGAGGAACTCTTCGGG-3'

**Spot 193:**

W193F1: 5'-GTCGGTGAGGTATCCTTTCG-3'

W193R1: 5'-ACGACCAGTGGGTAGTCCAG-3'

**Spot 194:**

W194F2: 5'-GTGGCTTGGTTTAGACAAAGA-3'

W194R2: 5'-CTCGCTTGCATACTTCCAGTT -3'

**Spot 196:**

W196F1: 5'-CGATTCGTTCTGTAGCGACTAGA -3'

W196R1: 5'-TCGAGGGCATTGTTGTAATTAGT -3'

**Spot 201:**

W201F1: 5'-GGAGGAGAAGGCAAACGAGAT -3'

W201R1: 5'-AACCGAAGCAAACACTGAACAAT -3'

**Spot 205:**

W205F3: 5'-ATACTACGGCGATAACCACTCG-3'

W205R3: 5'-CCTTTACCGGAACCAACATAC-3'

**Spot 208:**

W208F2: 5'-CACAAGGACCTGACCTTTTGG -3'

W208R2: 5'- AAGAACAGCCGCGAGTTTCTC-3'

**Primers for Actin gene:**

F: 5'- CAACTCTCCCGCCATGTATGT-3'

R: 5'- GAGCTGGTCTTGGAAGTCTCC-3'
