# Supplementary material
Source: PubMed Central journal article supplement (PMC3734578)

**Suppl Data 2:** Representative 2-DE gels for proteins from leaves of different NaCl treated plants

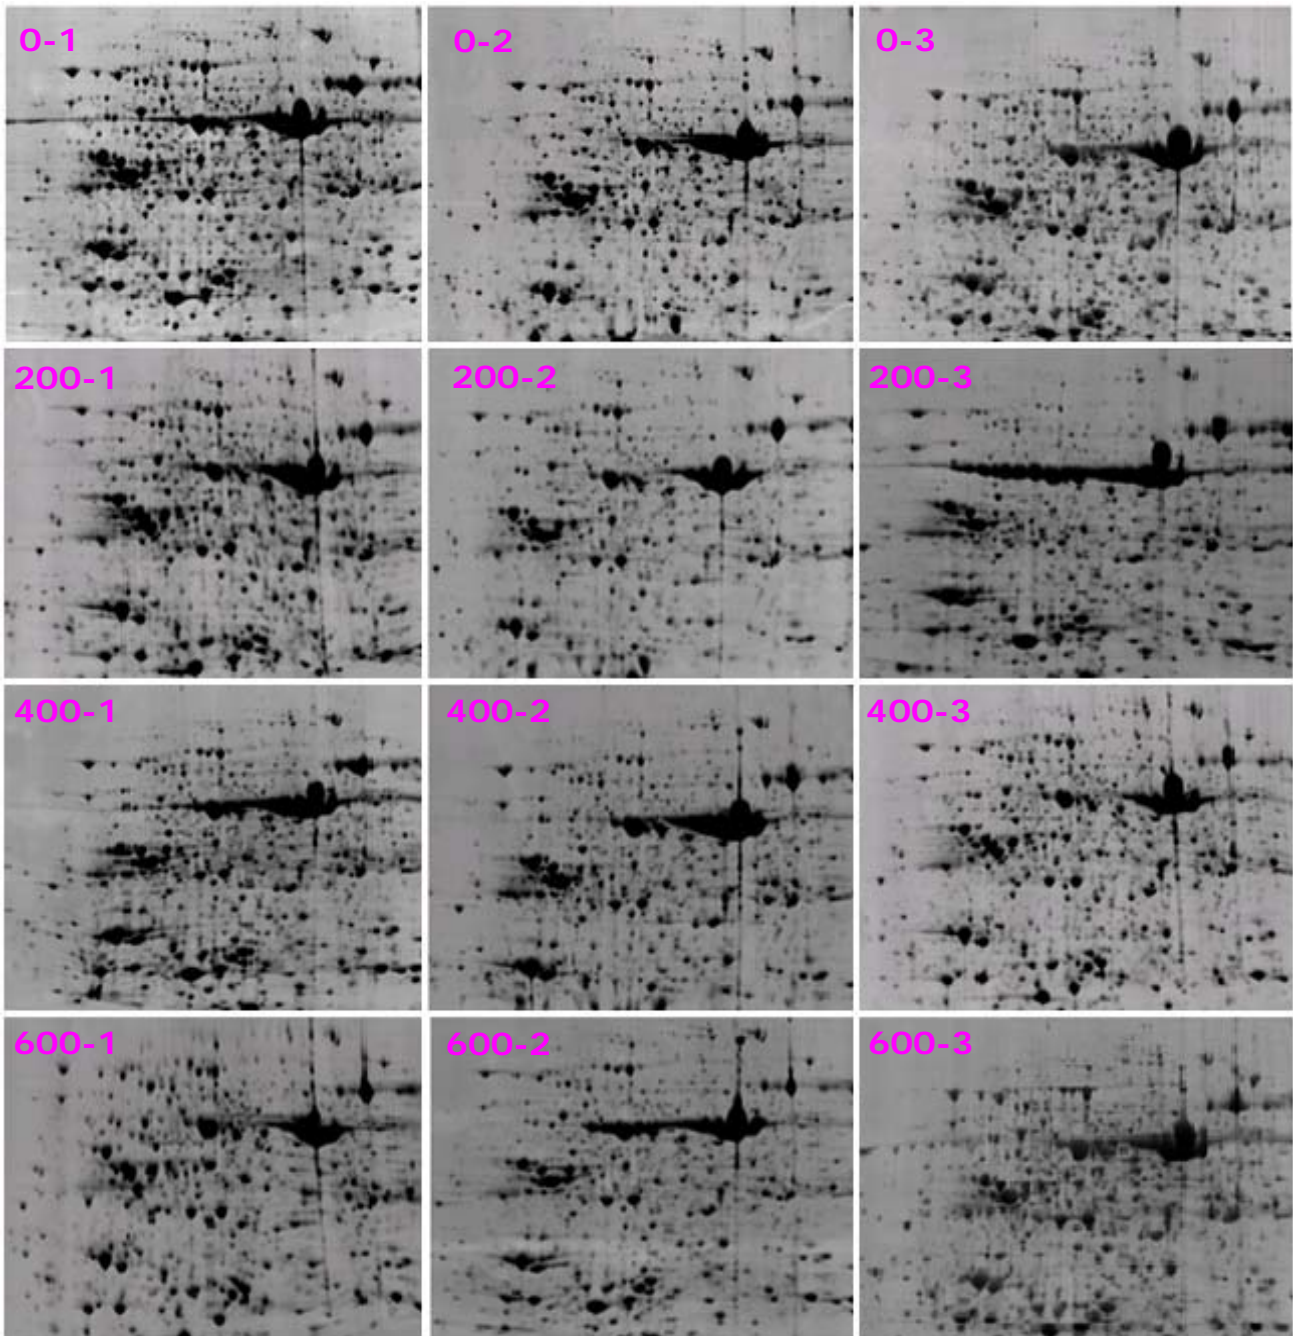

Supplement: supp_M112.022475_mcp.M112.022475-2.pdf [file supp_M112.022475_mcp.M112.022475-2.pdf]
